# Supplementary material
Source: PubMed Central journal article supplement (PMC3146290)
Supplement: ismej20113x1.pdf [file ismej20113x1.pdf]

## Supplementary Figure 1

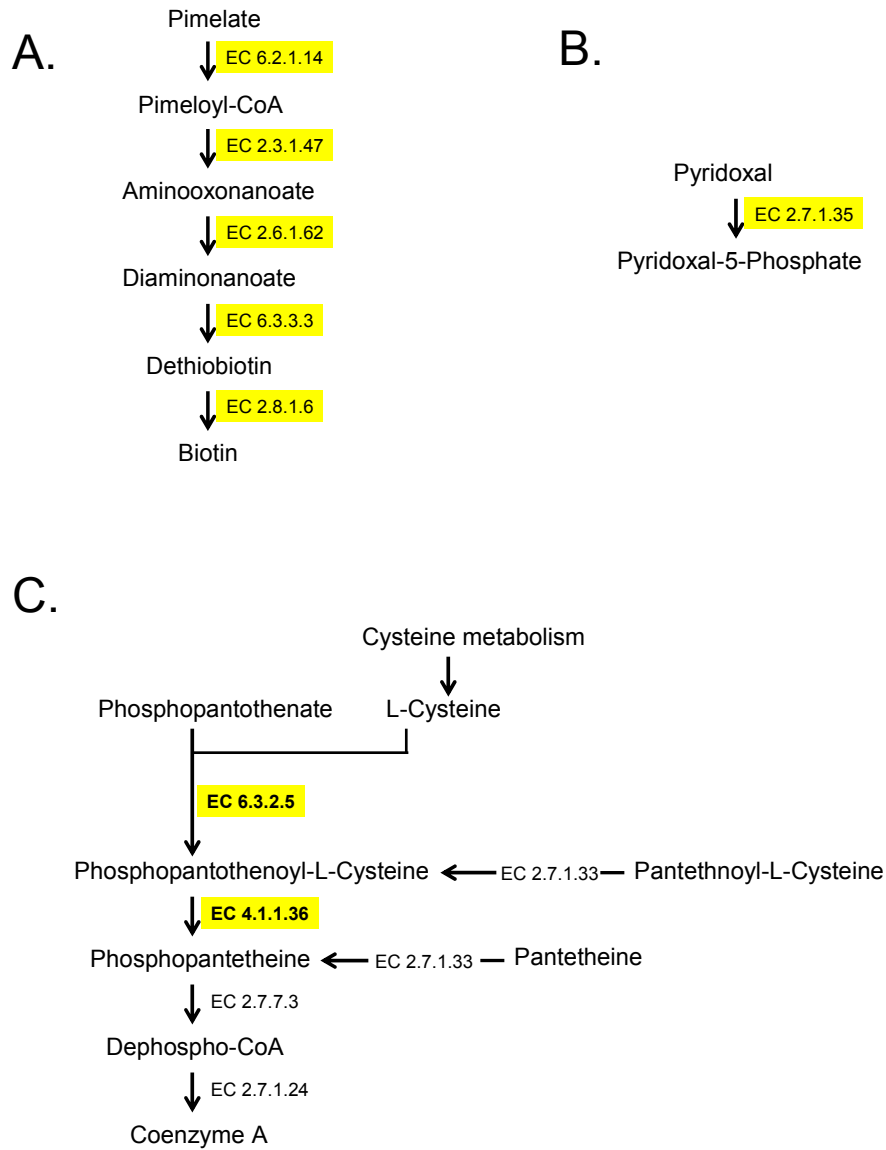

Supplementary Tables 1-4:

Supplementary Table 1: Up and Down Regulated Genes.....Pages 2-11

Supplementary Table 2: Genes Not Expressed.....Pages 12-17

Supplementary Table 3: Sequencing sample details.....Page 18

Supplementary Table 4: Gene Expression Data for All Genes...Pages 19-206

***T. primitia* genes up in coculture**

| Gene Annotation                                                         | TREPR # | Start   | End     | Pure Culture | Co Culture | Ratio |
|-------------------------------------------------------------------------|---------|---------|---------|--------------|------------|-------|
| NAD-reducing hydrogenase subunit HoxE (EC 1.12.1.2)                     | 3286    | 874002  | 874493  | 183.30       | 2230.55    | 12.17 |
| 1.12.7.2)                                                               | 3288    | 870374  | 872107  | 80.78        | 864.46     | 10.70 |
| NAD-reducing hydrogenase subunit HoxF (EC 1.12.1.2)                     | 3287    | 872126  | 874009  | 97.19        | 1030.81    | 10.61 |
| carboxylesterase type B                                                 | 1338    | 2968291 | 2969916 | 263.38       | 1929.71    | 7.33  |
| Methionine biosynthesis and transport regulator MtaR, LysR family       | 3284    | 874786  | 875715  | 26.91        | 161.26     | 5.99  |
| L-arabinose-binding periplasmic protein precursor araF (TC 3.A.1.2.2)   | 3001    | 1166292 | 1167440 | 669.45       | 4007.11    | 5.99  |
| 4.1.3.27)                                                               | 382     | 3961274 | 3962782 | 10.61        | 62.94      | 5.93  |
| Transcriptional regulator, MerR family                                  | 3853    | 321299  | 321640  | 8.80         | 51.85      | 5.89  |
| para-nitrobenzyl esterase (intracellular esterase B)                    | 1337    | 2970016 | 2971620 | 337.28       | 1963.68    | 5.82  |
| hypothetical protein                                                    | 3536    | 631219  | 631452  | 17.17        | 87.86      | 5.12  |
| Periplasmic [Fe] hydrogenase (EC 1.12.7.2)                              | 3283    | 875727  | 877490  | 39.14        | 194.76     | 4.98  |
| hypothetical protein                                                    | 3282    | 877487  | 878695  | 47.19        | 229.54     | 4.86  |
| Methylcobalamin:coenzyme M methyltransferase, methylamine-specific      | 2998    | 1170460 | 1171461 | 37.96        | 183.13     | 4.82  |
| Prephenate and/or aroenate dehydrogenase (unknown specificity)          | 3227    | 927783  | 928649  | 117.78       | 495.34     | 4.21  |
| Tryptophan synthase beta chain like (EC 4.2.1.20)                       | 456     | 3882792 | 3884171 | 151.56       | 624.16     | 4.12  |
| Carboxylesterase, type B precursor                                      | 1599    | 2692216 | 2693931 | 362.10       | 1452.99    | 4.01  |
| L-arabinose transport system permease protein (TC 3.A.1.2.2)            | 2999    | 1169115 | 1170308 | 52.41        | 199.05     | 3.80  |
| hypothetical protein                                                    |         | 537570  | 537692  | 15.87        | 59.08      | 3.72  |
| Conserved domain protein                                                | 3310    | 849023  | 849433  | 17.07        | 61.28      | 3.59  |
| L-arabinose transport ATP-binding protein araG (TC 3.A.1.2.2)           | 3000    | 1167547 | 1169073 | 105.37       | 333.36     | 3.16  |
| 2-keto-3-deoxy-D-arabino-heptulosonate-7-phosphate synthase I beta      | 3226    | 928662  | 929687  | 155.12       | 486.58     | 3.14  |
| RNA polymerase sigma factor RpoD                                        | 3818    | 354130  | 355032  | 29.93        | 93.88      | 3.14  |
| Spermidine Putrescine ABC transporter permease component potB           | 568     | 3757692 | 3758525 | 26.41        | 78.19      | 2.96  |
| Anthranilate phosphoribosyltransferase (EC 2.4.2.18)                    | 384     | 3959654 | 3960709 | 23.70        | 69.68      | 2.94  |
| hypothetical protein                                                    | 1822    | 2428503 | 2428907 | 17.33        | 50.67      | 2.92  |
| Branched-chain amino acid transport ATP-binding protein livG            | 435     | 3902047 | 3902817 | 31.17        | 90.63      | 2.91  |
| Phosphoribosylanthranilate isomerase (EC 5.3.1.24)                      |         | 3958024 | 3958767 | 49.80        | 134.00     | 2.69  |
| Phosphoglycerate mutase family                                          | 2955    | 1219843 | 1220697 | 26.93        | 71.91      | 2.67  |
| ClpB protein                                                            | 638     | 3685111 | 3687729 | 29.43        | 78.25      | 2.66  |
| Two-component response regulator yvqC                                   | 3518    | 648537  | 649157  | 19.35        | 51.03      | 2.64  |
| Cytidine deaminase (EC 3.5.4.5)                                         | 1802    | 2450915 | 2451313 | 25.13        | 65.46      | 2.61  |
| Pyrimidine ABC transporter, substrate-binding component                 | 427     | 3908904 | 3909986 | 26.80        | 69.66      | 2.60  |
| hypothetical protein                                                    |         | 3530451 | 3530573 | 65.57        | 160.17     | 2.44  |
| ABC transporter, periplasmic spermidine putrescine-bind protein potD    | 570     | 3755719 | 3756759 | 336.54       | 807.92     | 2.40  |
| Homolog of plant auxin-responsive GH3-like protein                      | 1121    | 3194547 | 3196250 | 28.84        | 67.91      | 2.35  |
| Heat shock protein 60 family chaperone GroEL                            | 596     | 3728822 | 3730468 | 1335.42      | 3105.94    | 2.33  |
| Lysine 2,3-aminomutase (EC 5.4.3.2)                                     | 566     | 3759958 | 3761019 | 32.99        | 76.30      | 2.31  |
| Acetoin utilization protein AcuB                                        | 1127    | 3189210 | 3189854 | 66.77        | 153.16     | 2.29  |
| Endoribonuclease L-PSP                                                  | 2961    | 1215000 | 1215377 | 47.75        | 108.60     | 2.27  |
| Cell division transporter, ATP-binding protein ftsE (TC 3.A.5.1.1)      |         | 2861251 | 2861931 | 27.94        | 62.95      | 2.25  |
| Glutamine transport ATP-binding protein glnQ (TC 3.A.1.3.2)             | 953     | 3376499 | 3377248 | 38.04        | 84.71      | 2.23  |
| Chaperone protein HtpG                                                  | 3196    | 957207  | 959114  | 142.63       | 315.70     | 2.21  |
| Hypothetical protein YaeJ with similarity to translation release factor | 1030    | 3290592 | 3291017 | 44.71        | 98.52      | 2.20  |

|                                                                              |      |         |         |        |        |      |
|------------------------------------------------------------------------------|------|---------|---------|--------|--------|------|
| Methyltransferase small                                                      | 1456 | 2830844 | 2832103 | 47.66  | 104.95 | 2.20 |
| Kynurenine formamidase, bacterial (EC 3.5.1.9)                               | 3197 | 956537  | 957205  | 32.93  | 72.43  | 2.20 |
| Branched-chain amino acid ABC transporter, amino acid-binding protein        | 432  | 3904910 | 3906109 | 236.03 | 516.86 | 2.19 |
| Ornithine decarboxylase (EC 4.1.1.17) / Arginine decarboxylase (EC 4.1.1.19) | 3147 | 1018648 | 1019817 | 57.49  | 125.63 | 2.19 |
| 4-carboxymuconolactone decarboxylase (EC 4.1.1.44)                           | 3620 | 539625  | 539942  | 192.43 | 416.82 | 2.17 |
| hypothetical protein                                                         | 2494 | 1708273 | 1709193 | 36.96  | 79.90  | 2.16 |
| Uncharacterized protein TP_0983 precursor                                    | 459  | 3881265 | 3881951 | 24.78  | 52.90  | 2.13 |
| Cell division protein                                                        | 3138 | 1027529 | 1028272 | 410.50 | 862.87 | 2.10 |
| hypothetical protein                                                         | 694  | 3622768 | 3622908 | 171.43 | 352.26 | 2.05 |
| hypothetical protein                                                         | 766  | 3546689 | 3548152 | 24.61  | 50.25  | 2.04 |

### ***T. primitia* genes up in pure culture**

| <b>Gene Annotation</b>                                                     | <b>TREPR #</b> | <b>Start</b> | <b>End</b> | <b>Pure Culture</b> | <b>Co Culture</b> | <b>Ratio</b> |
|----------------------------------------------------------------------------|----------------|--------------|------------|---------------------|-------------------|--------------|
| Formate dehydrogenase chain D (EC 1.2.1.2)                                 | 3093           | 1070856      | 1071467    | 62.19               | 1.52              | 40.84        |
| hypothetical protein                                                       | 3096           | 1068556      | 1068936    | 286.84              | 7.35              | 39.05        |
| Formate dehydrogenase chain D (EC 1.2.1.2)                                 | 3097           | 1067822      | 1068559    | 398.91              | 21.46             | 18.59        |
| Electron transport protein hydN                                            | 3098           | 1067277      | 1067795    | 1100.39             | 59.28             | 18.56        |
| Formate dehydrogenase H (EC 1.2.1.2); selenocysteine-containing            | 3099           | 1065082      | 1067280    | 601.46              | 33.44             | 17.98        |
| DNA polymerase III alpha subunit (EC 2.7.7.7)                              | 3289           | 869227       | 869886     | 95.60               | 5.65              | 16.93        |
| hypothetical protein                                                       | 3290           | 1569215      | 1569355    | 107.14              | 6.65              | 16.12        |
| hypothetical protein                                                       | 2615           | 868868       | 869035     | 269.46              | 16.72             | 16.12        |
| 1.12.7.2)                                                                  | 3094           | 1069499      | 1070863    | 494.87              | 31.38             | 15.77        |
| Fe-S-cluster-containing hydrogenase components 2                           | 3095           | 1068951      | 1069496    | 552.29              | 39.27             | 14.06        |
| hypothetical protein                                                       |                | 668548       | 668670     | 90.16               | 7.63              | 11.82        |
| hypothetical protein                                                       |                | 78581        | 78751      | 58.82               | 5.47              | 10.75        |
| Periplasmic binding protein precursor                                      | 3273           | 885955       | 887037     | 697.78              | 77.40             | 9.02         |
| hypothetical protein                                                       |                | 3272279      | 3272416    | 58.39               | 6.79              | 8.60         |
| hypothetical protein                                                       | 3847           | 325023       | 325166     | 104.90              | 13.01             | 8.06         |
| hypothetical protein                                                       |                | 1335569      | 1335694    | 56.00               | 7.44              | 7.52         |
| Transport system permease protein precursor                                | 3272           | 887030       | 888097     | 359.89              | 47.96             | 7.50         |
| Ubiquinone biosynthesis SAM-dependent O-methyltransferase                  | 3278           | 881732       | 882385     | 1356.81             | 183.82            | 7.38         |
| hypothetical protein                                                       |                | 881534       | 881680     | 226.03              | 31.87             | 7.09         |
| Cobalamin biosynthesis protein CbiG                                        | 522            | 3809375      | 3810166    | 99.87               | 15.29             | 6.53         |
| hypothetical protein                                                       | 3558           | 609833       | 610060     | 52.86               | 8.20              | 6.45         |
| Formylmethanofuran dehydrogenase subunit E                                 | 3274           | 885421       | 885945     | 692.75              | 111.87            | 6.19         |
| Periplasmic binding protein precursor                                      | 3277           | 882407       | 883468     | 1388.31             | 256.96            | 5.40         |
| 2.1.1.133)                                                                 | 521            | 3810163      | 3810915    | 98.40               | 19.80             | 4.97         |
| hypothetical protein                                                       | 763            | 3550294      | 3550488    | 231.96              | 47.96             | 4.84         |
| hypothetical protein                                                       | 438            | 3900273      | 3900569    | 60.81               | 12.57             | 4.84         |
| Phage-related protein                                                      | 774            | 3542127      | 3542432    | 72.13               | 15.25             | 4.73         |
| Cobalt-precorrin-8x methylmutase (EC 5.4.1.2)                              | 531            | 3800567      | 3801205    | 235.11              | 51.05             | 4.61         |
| Cobalt-precorrin-6 synthase, anaerobic                                     | 520            | 3810912      | 3812117    | 131.12              | 28.57             | 4.59         |
| hypothetical protein                                                       | 3033           | 1134458      | 1134580    | 98.36               | 22.88             | 4.30         |
| Ferric siderophore transport system, periplasmic binding protein TonB      | 519            | 3812121      | 3812810    | 136.43              | 33.76             | 4.04         |
| 2-polyprenylphenol hydroxylase and related flavodoxin oxidoreductases      | 1325           | 2985738      | 2986022    | 52.82               | 13.11             | 4.03         |
| Iron(III) dicitrate transport system permease protein fecD (TC 3.A.1.14.1) | 3276           | 883461       | 884558     | 506.84              | 127.23            | 3.98         |
| Cobyrinic acid A,C-diamide synthase                                        | 526            | 3805166      | 3806659    | 97.12               | 24.93             | 3.90         |
| Vitamin B12 ABC transporter, ATPase component BtuD                         | 3275           | 884552       | 885319     | 447.20              | 116.46            | 3.84         |
| Glycosyl transferase, family 2                                             | 2389           | 1836405      | 1837325    | 54.35               | 14.16             | 3.84         |

|                                                                           |      |         |         |         |         |      |
|---------------------------------------------------------------------------|------|---------|---------|---------|---------|------|
| Cobalt-precorrin-6x reductase (EC 1.3.1.54)                               |      | 3807912 | 3808658 | 95.17   | 24.95   | 3.82 |
| Sirohydrochlorin cobaltochelataase CbiK (EC 4.99.1.3)                     | 516  | 3815334 | 3816242 | 286.34  | 75.83   | 3.78 |
| TonB-dependent receptor; Outer membrane receptor for ferrienterochelin    | 518  | 3812807 | 3814774 | 82.87   | 22.23   | 3.73 |
| hypothetical protein                                                      |      | 3796685 | 3796810 | 328.00  | 89.33   | 3.67 |
| Dipeptide transport system permease protein dppC (TC 3.A.1.5.2)           | 3268 | 891497  | 892330  | 429.77  | 122.88  | 3.50 |
| hypothetical protein                                                      |      | 3335858 | 3336019 | 80.75   | 23.12   | 3.49 |
| hypothetical protein                                                      | 990  | 1407341 | 1407556 | 60.47   | 17.31   | 3.49 |
| ABC-type cobalamin/Fe3+-siderophores transport systems                    | 3271 | 888094  | 888861  | 232.07  | 69.15   | 3.36 |
| hypothetical protein                                                      |      | 2258891 | 2259022 | 213.74  | 63.93   | 3.34 |
| hypothetical protein                                                      |      | 3542927 | 3543043 | 51.72   | 16.04   | 3.22 |
| Cob(I)alamin adenosyltransferase (EC 2.5.1.17)                            | 530  | 3801205 | 3801708 | 105.37  | 33.30   | 3.16 |
| Cobalt-precorrin-3b C17-methyltransferase                                 | 523  | 3808651 | 3809382 | 80.71   | 26.73   | 3.02 |
| hypothetical protein                                                      | 2720 | 3796129 | 3796686 | 879.71  | 292.35  | 3.01 |
| hypothetical protein                                                      | 536  | 1462944 | 1463141 | 71.07   | 23.62   | 3.01 |
| Dipeptide-binding ABC transporter, periplasmic substrate-binding comp.    | 3270 | 888911  | 890509  | 1202.75 | 406.44  | 2.96 |
| DNA-damage-inducible protein J                                            | 1440 | 2845993 | 2846259 | 82.71   | 27.98   | 2.96 |
| Helix-turn-helix domain protein                                           | 1430 | 2857398 | 2857748 | 62.86   | 21.27   | 2.96 |
| Cobalt-precorrin-6y C5-methyltransferase (EC 2.1.1.-)                     | 525  | 3806656 | 3807915 | 76.25   | 25.87   | 2.95 |
| Dipeptide transport system permease protein dppB (TC 3.A.1.5.2)           | 3269 | 890514  | 891500  | 775.86  | 265.18  | 2.93 |
| Dipeptide transport ATP-binding protein dppF (TC 3.A.1.5.2)               | 3266 | 893251  | 893922  | 697.47  | 242.68  | 2.87 |
| hypothetical protein                                                      |      | 3409480 | 3409626 | 54.79   | 19.12   | 2.87 |
| hypothetical protein                                                      |      | 4041243 | 4041416 | 260.12  | 91.44   | 2.84 |
| Virulence associated protein B                                            | 605  | 3721600 | 3721875 | 105.45  | 37.22   | 2.83 |
| hypothetical protein                                                      | 3503 | 662654  | 662770  | 181.03  | 64.17   | 2.82 |
| hypothetical protein                                                      | 646  | 3676334 | 3677143 | 80.35   | 28.75   | 2.79 |
| L-threonine 3-O-phosphate decarboxylase (EC 4.1.1.81)                     | 528  | 3803164 | 3804219 | 60.66   | 22.05   | 2.75 |
| hypothetical protein                                                      | 361  | 3984083 | 3984316 | 98.71   | 35.94   | 2.75 |
| hypothetical protein                                                      |      | 3285304 | 3285438 | 149.25  | 55.55   | 2.69 |
| hypothetical protein                                                      | 2251 | 2786862 | 2787296 | 357.14  | 132.93  | 2.69 |
| hypothetical protein                                                      | 1516 | 1987378 | 1987521 | 139.86  | 52.06   | 2.69 |
| hypothetical protein                                                      | 3880 | 291840  | 292043  | 349.75  | 132.93  | 2.63 |
| Transcriptional regulator, ArsR family                                    | 2793 | 1376031 | 1376321 | 134.48  | 51.34   | 2.62 |
| D,D-heptose 7-phosphate kinase                                            | 2396 | 1828711 | 1829745 | 51.26   | 19.80   | 2.59 |
| Plasmid maintenance system killer                                         | 3322 | 836035  | 836316  | 110.32  | 43.05   | 2.56 |
| PAP2 family protein                                                       | 419  | 3918046 | 3918837 | 68.27   | 27.06   | 2.52 |
| Vitamin B12 ABC transporter, permease component BtuC                      | 532  | 3799488 | 3800570 | 51.76   | 20.64   | 2.51 |
| predicted protein                                                         | 3281 | 879668  | 880534  | 83.14   | 33.31   | 2.50 |
| carboxylesterase type B                                                   |      | 3895004 | 3895147 | 468.53  | 188.70  | 2.48 |
| hypothetical protein                                                      | 2778 | 1402807 | 1403109 | 99.34   | 40.05   | 2.48 |
| L-2-haloalkanoic acid dehalogenase                                        | 1977 | 2284492 | 2285262 | 77.92   | 31.42   | 2.48 |
| Dephospho-CoA kinase (EC 2.7.1.24)                                        | 3267 | 1028278 | 1028919 | 308.89  | 124.84  | 2.47 |
| Dipeptide transport ATP-binding protein dppD (TC 3.A.1.5.2)               | 3137 | 892335  | 893267  | 531.12  | 214.65  | 2.47 |
| Multi antimicrobial extrusion protein (Na <sup>+</sup> )/drug antiporter) | 1569 | 2731914 | 2733287 | 56.81   | 23.04   | 2.47 |
| hypothetical protein                                                      |      | 78818   | 79132   | 130.57  | 53.34   | 2.45 |
| Uncharacterized protein TP_0753                                           | 1731 | 2532485 | 2532817 | 75.30   | 30.83   | 2.44 |
| hypothetical protein                                                      |      | 2815446 | 2815541 | 3336.84 | 1381.06 | 2.42 |
| hypothetical protein                                                      | 2440 | 1770337 | 1770753 | 74.52   | 31.31   | 2.38 |

|                                                                    |             |                   |                   |                   |                 |              |
|--------------------------------------------------------------------|-------------|-------------------|-------------------|-------------------|-----------------|--------------|
| predicted metal-dependent hydrolase                                | 1688        | 2573507           | 2573977           | 195.74            | 85.13           | 2.30         |
| dTDP-4-dehydrorhamnose reductase (EC 1.1.1.133)                    | 202         | 75026             | 75928             | 89.80             | 39.20           | 2.29         |
| hypothetical protein                                               | 3516        | 649678            | 649911            | 218.88            | 95.85           | 2.28         |
| Transcription antitermination protein NusG                         | 2355        | 1875071           | 1875613           | 302.58            | 135.63          | 2.23         |
| Outer membrane vitamin B12 receptor BtuB<br>1.2.7.7)               | 537<br>3422 | 3794074<br>732798 | 3796101<br>733028 | 192.40<br>1052.17 | 86.30<br>473.34 | 2.23<br>2.22 |
| hypothetical protein                                               | 328         | 4015961           | 4016398           | 70.94             | 31.94           | 2.22         |
| Ubiquinone biosynthesis SAM-dependent O-<br>methyltransferase      |             | 4015438           | 4015665           | 105.73            | 49.19           | 2.15         |
| hypothetical protein                                               | 751         | 3558743           | 3558886           | 139.86            | 65.07           | 2.15         |
| Mutator mutT protein (7,8-dihydro-8-oxoguanine-<br>triphosphatase) | 3471        | 1883010           | 1883387           | 137.93            | 64.17           | 2.15         |
| hypothetical protein                                               | 2347        | 690256            | 690429            | 115.61            | 53.79           | 2.15         |
| Amino acid transporter                                             | 3564        | 603721            | 605130            | 1449.25           | 674.93          | 2.15         |
| Core component NikM of nickel ECF transporter                      | 3292        | 867358            | 868365            | 283.02            | 132.14          | 2.14         |
| hypothetical protein                                               |             | 345083            | 345220            | 284.67            | 135.84          | 2.10         |
| hypothetical protein                                               | 3218        | 937348            | 937512            | 225.61            | 107.80          | 2.09         |
| hypothetical protein                                               | 2805        | 1366237           | 1366476           | 405.86            | 194.67          | 2.08         |
| Uroporphyrinogen-III decarboxylase                                 | 514         | 3817849           | 3818976           | 106.48            | 51.19           | 2.08         |
| hypothetical protein                                               |             | 1500570           | 1500749           | 324.02            | 155.95          | 2.08         |
| Nitrogenase iron protein (EC 1.18.6.1)                             | 541         | 3789166           | 3791367           | 112.22            | 54.54           | 2.06         |
| Adenosylcobinamide-phosphate guanylyltransferase<br>(EC 2.7.7.62)  | 543         | 3787352           | 3787882           | 126.42            | 61.45           | 2.06         |
| hypothetical protein                                               |             | 4017052           | 4017225           | 121.39            | 59.16           | 2.05         |
| Serine phosphatase RsbU, regulator of sigma subunit                |             | 2011343           | 2011795           | 92.92             | 45.29           | 2.05         |
| Phosphinothricin N-acetyltransferase                               | 2912        | 1274940           | 1275449           | 82.51             | 40.22           | 2.05         |
| hypothetical protein                                               |             | 178749            | 178934            | 91.89             | 45.27           | 2.03         |
| COG0523: Putative GTPases (G3E family)                             |             | 2735711           | 2736307           | 78.86             | 39.03           | 2.02         |
| Cobyrinic acid synthase                                            | 529         | 3801705           | 3803180           | 109.15            | 54.25           | 2.01         |

## ***T. azotonutricium* genes up in coculture**

| <b>Gene Annotation</b>                                          | <b>TREAZ #</b> | <b>Start</b> | <b>End</b> | <b>Pure Culture</b> | <b>Co Culture</b> | <b>Ratio</b> |
|-----------------------------------------------------------------|----------------|--------------|------------|---------------------|-------------------|--------------|
| ABC transporter substrate-binding protein - sugar<br>transport  | 1577           | 794228       | 795781     | 38.31               | 547.65            | 14.29        |
| putative membrane protein                                       | 1575           | 798115       | 799464     | 6.67                | 75.06             | 11.25        |
| hypothetical protein                                            | 558            | 1917883      | 1917996    | 8.85                | 79.65             | 9.00         |
| hypothetical protein                                            | 1576           | 795901       | 798039     | 23.85               | 203.11            | 8.51         |
| Inosine-uridine preferring nucleoside hydrolase (EC<br>3.2.2.1) | 1574           | 799701       | 800621     | 23.37               | 100.27            | 4.29         |
| maltose/maltodextrin transport permease                         | 1578           | 793317       | 794204     | 22.55               | 88.78             | 3.94         |
| hypothetical protein                                            | 3021           | 3171453      | 3172115    | 224.32              | 832.70            | 3.71         |
| hypothetical protein                                            | 2253           | 92597        | 92782      | 59.46               | 206.76            | 3.48         |
| hypothetical protein                                            | 2447           | 3750238      | 3750360    | 16.39               | 55.33             | 3.38         |
| HtrA protease/chaperone protein                                 | 3421           | 2764903      | 2766411    | 1613.73             | 5425.07           | 3.36         |
| Ferredoxin                                                      | 2914           | 3274324      | 3275586    | 494.06              | 1565.37           | 3.17         |
| Collagen binding protein Cna                                    | 714            | 1767659      | 1769179    | 163.16              | 513.65            | 3.15         |
| Collagen binding protein Cna                                    | 1765           | 593572       | 595089     | 152.93              | 468.69            | 3.06         |
| LSU ribosomal protein L6p (L9e)                                 | 2666           | 3537428      | 3537967    | 709.65              | 2149.81           | 3.03         |
| Uncharacterized protein TP_0214                                 | 2678           | 3531176      | 3531397    | 622.17              | 1802.04           | 2.90         |
| hypothetical protein                                            |                | 2751730      | 2751873    | 27.97               | 78.67             | 2.81         |
| LSU ribosomal protein L24p (L26e)                               | 2662           | 3539135      | 3539461    | 960.12              | 2622.70           | 2.73         |
| hypothetical protein                                            |                | 1303994      | 1304119    | 20.00               | 54.00             | 2.70         |
| hypothetical protein                                            | 1930           | 437899       | 438171     | 82.72               | 223.35            | 2.70         |

|                                                                                                       |      |         |         |         |         |      |
|-------------------------------------------------------------------------------------------------------|------|---------|---------|---------|---------|------|
| hypothetical protein                                                                                  | 1138 | 3503057 | 3503263 | 97.09   | 262.14  | 2.70 |
| SSU ribosomal protein S21p                                                                            | 1214 | 1201828 | 1202001 | 526.01  | 1417.63 | 2.70 |
| LSU ribosomal protein L17p                                                                            | 2676 | 3531398 | 3531856 | 1042.58 | 2775.66 | 2.66 |
| LSU ribosomal protein L14p (L23e)                                                                     | 2661 | 3539471 | 3539842 | 394.88  | 1024.93 | 2.60 |
| SSU ribosomal protein S17p (S11e)                                                                     | 2660 | 3539858 | 3540130 | 900.74  | 2332.72 | 2.59 |
| hypothetical protein                                                                                  | 1105 | 1349558 | 1349728 | 20.59   | 52.94   | 2.57 |
| SSU ribosomal protein S19p (S15e)                                                                     | 2655 | 3541887 | 3542168 | 485.77  | 1249.11 | 2.57 |
| SSU ribosomal protein S8p (S15Ae)                                                                     | 2665 | 3537980 | 3538378 | 468.19  | 1190.84 | 2.54 |
| hypothetical protein                                                                                  | 1690 | 681256  | 682269  | 131.29  | 333.17  | 2.54 |
| hypothetical protein                                                                                  | 2359 | 3836956 | 3837180 | 35.71   | 90.40   | 2.53 |
| Preprotein translocase secY subunit (TC 3.A.5.1.1)                                                    | 2671 | 3534522 | 3535850 | 335.36  | 839.91  | 2.50 |
| hypothetical protein                                                                                  | 3420 | 2763773 | 2764906 | 301.85  | 754.63  | 2.50 |
| SSU ribosomal protein S14p (S29e)                                                                     | 2664 | 3538388 | 3538573 | 505.46  | 1241.80 | 2.46 |
| hypothetical protein                                                                                  | 629  | 1855804 | 1856811 | 166.34  | 406.65  | 2.44 |
| DNA-directed RNA polymerase alpha subunit (EC 2.7.7.6)                                                | 2675 | 3531846 | 3532901 | 849.13  | 2073.74 | 2.44 |
| LSU ribosomal protein L22p (L17e)                                                                     | 2656 | 3541507 | 3541875 | 720.11  | 1754.76 | 2.44 |
| Phosphomannomutase (EC 5.4.2.8) /<br>Phosphoglucosamine mutase (EC 5.4.2.10)                          | 254  | 2220429 | 2222225 | 104.12  | 250.56  | 2.41 |
| 3-isopropylmalate dehydrogenase (EC 1.1.1.85)                                                         | 3029 | 3161729 | 3162880 | 162.47  | 390.96  | 2.41 |
| LSU ribosomal protein L5p (L11e)                                                                      | 2663 | 3538584 | 3539135 | 954.63  | 2294.92 | 2.40 |
| Recombination inhibitory protein MutS2                                                                | 3464 | 2718721 | 2719116 | 315.19  | 751.90  | 2.39 |
| Outer membrane protein H precursor                                                                    | 551  | 1928159 | 1928686 | 304.55  | 717.27  | 2.36 |
| LSU ribosomal protein L2p (L8e)                                                                       | 2654 | 3542180 | 3543007 | 1026.60 | 2415.96 | 2.35 |
| hypothetical protein                                                                                  | 1691 | 680503  | 681153  | 774.62  | 1810.38 | 2.34 |
| LSU ribosomal protein L29p (L35e)                                                                     | 2659 | 3540134 | 3540361 | 1171.81 | 2735.68 | 2.33 |
| SSU ribosomal protein S5p (S2e)                                                                       |      | 3536467 | 3537048 | 1213.43 | 2823.15 | 2.33 |
| LSU ribosomal protein L16p (L10e)                                                                     | 2658 | 3540371 | 3540796 | 862.35  | 1990.59 | 2.31 |
| LSU ribosomal protein L18p (L5e)                                                                      | 2667 | 3537057 | 3537419 | 864.64  | 1995.17 | 2.31 |
| LSU ribosomal protein L3p (L3e)                                                                       | 2651 | 3544001 | 3544636 | 788.19  | 1782.28 | 2.26 |
| precursor                                                                                             | 552  | 1925611 | 1928148 | 383.72  | 867.36  | 2.26 |
| SSU ribosomal protein S11p (S14e)                                                                     | 2673 | 3533563 | 3533946 | 1214.10 | 2743.47 | 2.26 |
| Dihydroxy-acid dehydratase (EC 4.2.1.9)                                                               | 3030 | 3160069 | 3161727 | 131.18  | 294.48  | 2.24 |
| DNA mismatch repair protein MutS<br>COG0779: clustered with transcription termination<br>protein NusA | 550  | 1928727 | 1931381 | 133.76  | 299.27  | 2.24 |
| Serine protease precursor MucD/AlgY associated with<br>sigma factor RpoE                              | 547  | 1934486 | 1934980 | 175.10  | 391.70  | 2.24 |
| Transcription termination protein NusB                                                                | 3508 | 2677520 | 2679364 | 220.99  | 491.73  | 2.23 |
| SSU ribosomal protein S7p (S5e)                                                                       | 3447 | 2736466 | 2736933 | 240.90  | 534.80  | 2.22 |
| SSU ribosomal protein S7p (S5e)                                                                       | 2647 | 3546788 | 3547258 | 975.53  | 2163.83 | 2.22 |
| LSU ribosomal protein L23p (L23Ae)                                                                    | 2653 | 3543014 | 3543301 | 611.50  | 1348.43 | 2.21 |
| Plasmid maintenance system antidote protein, XRE<br>family                                            | 2077 | 292355  | 292777  | 2131.52 | 4697.27 | 2.20 |
| Uncharacterized protein TP_0374                                                                       | 3507 | 2679377 | 2681053 | 391.11  | 861.87  | 2.20 |
| LSU ribosomal protein L4p (L1e)                                                                       | 2652 | 3543298 | 3543996 | 1344.56 | 2962.39 | 2.20 |
| LSU ribosomal protein L34p                                                                            | 2143 | 223628  | 223783  | 619.35  | 1364.52 | 2.20 |
| Flagellar hook-basal body complex protein flIE                                                        | 892  | 1568194 | 1568502 | 152.60  | 336.04  | 2.20 |
| hypothetical protein                                                                                  | 626  | 1858949 | 1859245 | 128.38  | 281.25  | 2.19 |
| Cell division protein ftsQ                                                                            | 904  | 1556017 | 1556835 | 56.85   | 123.78  | 2.18 |
| Transcriptional regulator, DeoR family                                                                | 1971 | 400460  | 401221  | 219.45  | 476.02  | 2.17 |
| Transcription antitermination protein NusG                                                            | 1288 | 1114129 | 1114686 | 468.58  | 1009.87 | 2.16 |
| COG1801: Uncharacterized conserved protein                                                            | 1049 | 1409475 | 1410308 | 93.64   | 201.04  | 2.15 |
| SSU ribosomal protein S3p (S3e)                                                                       | 2657 | 3540799 | 3541506 | 1106.53 | 2358.66 | 2.13 |
| hypothetical protein                                                                                  | 2292 | 51148   | 52395   | 81.40   | 173.22  | 2.13 |

|                                                                         |      |         |         |         |          |      |
|-------------------------------------------------------------------------|------|---------|---------|---------|----------|------|
| Acetolactate synthase large subunit (EC 2.2.1.6)                        | 3031 | 3158316 | 3160067 | 159.05  | 337.95   | 2.12 |
| YidD                                                                    | 2141 | 224180  | 224398  | 160.55  | 340.60   | 2.12 |
| tRNA (Guanine37-N1) -methyltransferase (EC 2.1.1.31)                    | 2468 | 3729183 | 3729983 | 171.25  | 362.81   | 2.12 |
| Ribosome recycling factor                                               | 619  | 1865960 | 1866514 | 562.27  | 1189.98  | 2.12 |
| SSU ribosomal protein S4p (S9e)                                         | 2674 | 3532911 | 3533546 | 829.62  | 1748.41  | 2.11 |
| hypothetical protein                                                    | 1275 | 1130118 | 1131407 | 4907.29 | 10307.41 | 2.10 |
| Undecaprenyl pyrophosphate synthetase (EC 2.5.1.31)                     | 620  | 1865238 | 1865948 | 260.56  | 545.07   | 2.09 |
| 2-isopropylmalate synthase (EC 2.3.3.13)                                | 3027 | 3164497 | 3166035 | 280.56  | 580.79   | 2.07 |
| 2.7.7.6)                                                                | 1283 | 1117146 | 1120781 | 497.37  | 1028.91  | 2.07 |
| Preprotein translocase subunit YajC (TC 3.A.5.1.1)                      | 3376 | 2804757 | 2805155 | 413.32  | 853.64   | 2.07 |
| hypothetical protein                                                    | 3157 | 3025153 | 3025599 | 105.38  | 216.93   | 2.06 |
| hypothetical protein                                                    | 615  | 1869218 | 1869424 | 169.90  | 349.51   | 2.06 |
| hypothetical protein                                                    | 1060 | 1399684 | 1399899 | 25.58   | 52.33    | 2.05 |
| Endoribonuclease L-PSP                                                  | 572  | 1902509 | 1902895 | 174.87  | 355.57   | 2.03 |
| cell division protein FtsL, putative                                    | 908  | 1552063 | 1552338 | 274.55  | 556.36   | 2.03 |
| 2-isopropylmalate synthase (EC 2.3.3.13)                                | 3448 | 3162892 | 3164493 | 127.15  | 257.47   | 2.03 |
| Peptidyl-prolyl cis-trans isomerase ppiD (EC 5.2.1.8)                   | 3028 | 2735423 | 2736463 | 548.08  | 1109.86  | 2.03 |
| SSU ribosomal protein S10p (S20e)                                       | 2650 | 3544761 | 3545165 | 2334.59 | 4719.92  | 2.02 |
| Methyl-accepting chemotaxis protein                                     | 1310 | 1094976 | 1095431 | 179.12  | 360.99   | 2.02 |
| 2.7.7.6)                                                                | 1282 | 1120792 | 1125546 | 545.80  | 1093.02  | 2.00 |
| LSU ribosomal protein L7/L12 (L23e)                                     | 1284 | 1116613 | 1116993 | 1002.63 | 2007.24  | 2.00 |
| hypothetical protein                                                    | 252  | 2222249 | 2222650 | 132.17  | 263.72   | 2.00 |
| Glycerol-3-phosphate dehydrogenase (NAD(P) <sup>+</sup> ) (EC 1.1.1.94) | 963  | 1500264 | 1501625 | 224.11  | 444.34   | 1.98 |

## ***T. azotonutricium* genes up in pure culture**

| Gene Annotation                                                                                                | TREAZ # | Start   | End     | Pure Culture | Co Culture | Ratio   |
|----------------------------------------------------------------------------------------------------------------|---------|---------|---------|--------------|------------|---------|
| hypothetical protein                                                                                           | 791     | 2215870 | 2216097 | 77.09        | 0.00       | #DIV/0! |
| hypothetical protein                                                                                           | 262     | 1688613 | 1688729 | 77.59        | 0.00       | #DIV/0! |
| hypothetical protein                                                                                           | 2728    | 3720529 | 3720648 | 63.03        | 0.00       | #DIV/0! |
| hypothetical protein                                                                                           | 2483    | 3464837 | 3465133 | 59.12        | 0.00       | #DIV/0! |
| FeMo cofactor biosynthesis protein NifB                                                                        | 1489    | 896526  | 897446  | 58.15        | 2.45       | 23.78   |
| Transmembrane component of general energizing module of ECF transporters                                       | 444     | 2038340 | 2038981 | 78.78        | 3.51       | 22.44   |
| Sulfate-binding protein sbp                                                                                    | 1737    | 631985  | 633055  | 228.04       | 10.51      | 21.69   |
| hypothetical protein                                                                                           | 1093    | 1366629 | 1366850 | 214.95       | 10.51      | 20.44   |
| Aspartate carbamoyltransferase regulatory chain (pyrI)                                                         | 2117    | 250702  | 251148  | 304.93       | 25.22      | 12.09   |
| hypothetical protein                                                                                           | 2343    | 3851733 | 3852158 | 55.29        | 5.29       | 10.44   |
| Aspartate carbamoyltransferase (EC 2.1.3.2)                                                                    | 2116    | 251161  | 252084  | 297.40       | 29.25      | 10.17   |
| Maltose/maltodextrin ABC transporter, permease protein MalG                                                    | 2114    | 252627  | 253481  | 52.69        | 5.27       | 10.00   |
| Nicotinamide-nucleotide adenyltransferase, NadR family (EC 2.7.7.1) / Ribosylnicotinamide kinase (EC 2.7.1.22) |         | 1662636 | 1663007 | 59.30        | 6.06       | 9.78    |
| ATPase component CbiO of energizing module of cobalt ECF transporter                                           | 445     | 2037595 | 2038347 | 202.79       | 20.94      | 9.68    |
| Biotin-protein ligase (EC 6.3.4.15) / Biotin operon repressor                                                  | 447     | 2035955 | 2036974 | 447.01       | 50.79      | 8.80    |
| Mlc, transcriptional repressor of MalT (the transcriptional activator of maltose regulon) and manXYZ operon    | 2081    | 288645  | 289799  | 50.26        | 5.85       | 8.59    |
| hypothetical protein                                                                                           | 1418    | 967746  | 967916  | 97.06        | 13.24      | 7.33    |
| hypothetical protein                                                                                           | 2610    | 3593260 | 3593469 | 76.56        | 10.77      | 7.11    |
| Transposase                                                                                                    |         | 1891141 | 1891443 | 51.32        | 7.45       | 6.89    |
| hypothetical protein                                                                                           | 523     | 1962257 | 1962655 | 1070.35      | 158.29     | 6.76    |



|                                                                                                                                 |      |         |         |         |        |      |
|---------------------------------------------------------------------------------------------------------------------------------|------|---------|---------|---------|--------|------|
| ABC-type nitrate/sulfonate/bicarbonate transport systems, periplasmic components                                                | 1484 | 899596  | 900666  | 56.07   | 8.41   | 6.67 |
| D-tyrosyl-tRNA(Tyr) deacylase (EC 3.1.-.-)                                                                                      | 527  | 1959307 | 1959813 | 205.53  | 31.13  | 6.60 |
| Dihydroorotase (EC 3.5.2.3)                                                                                                     | 2118 | 249418  | 250695  | 180.89  | 28.19  | 6.42 |
| Core component BioY of biotin ECF transporter                                                                                   | 446  | 2037027 | 2037605 | 141.00  | 23.36  | 6.04 |
| hypothetical protein                                                                                                            | 2745 | 3448277 | 3448525 | 54.44   | 9.07   | 6.00 |
| D-3-phosphoglycerate dehydrogenase (EC 1.1.1.95)                                                                                | 2881 | 3308376 | 3309554 | 2071.73 | 353.35 | 5.86 |
| RTX toxin, putative                                                                                                             | 522  | 1962657 | 1964027 | 1202.92 | 205.29 | 5.86 |
| hypothetical protein                                                                                                            | 1148 | 1292431 | 1292628 | 65.99   | 11.42  | 5.78 |
| Cysteine synthase (EC 2.5.1.47)                                                                                                 | 1486 | 898388  | 899338  | 94.21   | 16.58  | 5.68 |
| Zinc ABC transporter, inner membrane permease protein ZnuB                                                                      | 526  | 1959915 | 1960754 | 343.27  | 61.68  | 5.57 |
| Sulfate and thiosulfate import ATP-binding protein cysA (EC 3.6.3.25)                                                           | 1734 | 634751  | 635824  | 103.45  | 18.87  | 5.48 |
| Zinc ABC transporter, ATP-binding protein ZnuC                                                                                  | 525  | 1960747 | 1961478 | 563.61  | 107.73 | 5.23 |
| Phosphoserine aminotransferase (EC 2.6.1.52)                                                                                    | 2880 | 3309588 | 3310691 | 1266.09 | 242.75 | 5.22 |
| TonB-dependent receptor                                                                                                         |      | 1966243 | 1968273 | 250.25  | 48.77  | 5.13 |
| hypothetical protein                                                                                                            | 2361 | 3836209 | 3836343 | 85.82   | 16.79  | 5.11 |
| Nitrogenase iron protein (EC 1.18.6.1)                                                                                          | 1487 | 897462  | 898340  | 154.33  | 30.75  | 5.02 |
| hypothetical protein                                                                                                            | 2495 | 3717043 | 3717477 | 51.84   | 10.37  | 5.00 |
| hypothetical protein                                                                                                            | 1958 | 415639  | 416046  | 54.05   | 11.06  | 4.89 |
| hypothetical protein                                                                                                            | 2489 | 3718605 | 3718880 | 74.55   | 16.36  | 4.56 |
| anti-sigma F factor antagonist (spollAA-2); anti sigma b factor antagonist RsbV                                                 | 3130 | 3053986 | 3054339 | 86.40   | 19.12  | 4.52 |
| hypothetical protein                                                                                                            | 1543 | 1428039 | 1428173 | 74.63   | 16.79  | 4.44 |
| hypothetical protein                                                                                                            | 1030 | 840328  | 840699  | 54.50   | 12.26  | 4.44 |
| transposase, mutator family                                                                                                     | 2687 | 3522440 | 3523681 | 87.43   | 19.94  | 4.38 |
| Endonuclease/exonuclease/phosphatase family protein                                                                             | 1972 | 399357  | 400457  | 53.64   | 12.27  | 4.37 |
| Glutamine synthetase type III, GlnN (EC 6.3.1.2)                                                                                | 2961 | 3230164 | 3232305 | 197.18  | 45.42  | 4.34 |
| serine/threonine kinase                                                                                                         | 518  | 1965188 | 1966228 | 676.92  | 157.93 | 4.29 |
| Redox-sensitive transcriptional regulator (AT-rich DNA-binding protein)                                                         | 2879 | 3310743 | 3311315 | 899.48  | 212.41 | 4.23 |
| hypothetical protein                                                                                                            |      | 3831876 | 3832310 | 108.29  | 25.92  | 4.18 |
| Integrase domain protein                                                                                                        | 2915 | 3272902 | 3274137 | 53.04   | 12.75  | 4.16 |
| ABC transporter, periplasmic substrate-binding protein                                                                          | 2007 | 366260  | 367774  | 123.51  | 29.72  | 4.16 |
| Alkanesulfonates transport system permease protein                                                                              | 1500 | 885440  | 886441  | 91.91   | 22.48  | 4.09 |
| Periplasmic solute binding protein precursor                                                                                    | 524  | 1961479 | 1962249 | 1031.17 | 254.22 | 4.06 |
| Cysteine synthase (EC 2.5.1.47)                                                                                                 | 3538 | 2646421 | 2647341 | 1936.41 | 481.79 | 4.02 |
| Probable AAA family ATPase                                                                                                      | 2168 | 192289  | 194463  | 57.27   | 14.49  | 3.95 |
| Response regulator                                                                                                              | 883  | 1578143 | 1579243 | 56.36   | 14.32  | 3.94 |
| hypothetical protein                                                                                                            | 65   | 2416901 | 2417056 | 54.84   | 14.52  | 3.78 |
| ABC transporter, ATP-binding protein                                                                                            | 945  | 1515538 | 1516515 | 59.88   | 16.12  | 3.71 |
| hypothetical protein                                                                                                            | 3514 | 2670183 | 2670407 | 73.66   | 20.09  | 3.67 |
| Phosphonopyruvate decarboxylase (EC 4.1.1.82)                                                                                   | 2215 | 128641  | 129825  | 197.21  | 55.11  | 3.58 |
| Transcriptional regulator, LuxR family                                                                                          | 1633 | 743966  | 744580  | 51.30   | 14.66  | 3.50 |
| hypothetical protein                                                                                                            | 1215 | 1200918 | 1201808 | 52.81   | 15.17  | 3.48 |
| hypothetical protein                                                                                                            | 783  | 1696186 | 1696551 | 63.01   | 18.49  | 3.41 |
| hypothetical protein                                                                                                            | 1606 | 767235  | 767453  | 105.50  | 30.96  | 3.41 |
| hypothetical protein                                                                                                            | 519  | 1964464 | 1965210 | 513.40  | 150.80 | 3.40 |
| Molybdenum transport ATP-binding protein modC (TC 3.A.1.8.1) / Molybdenum transport system permease protein modB (TC 3.A.1.8.1) |      | 2954491 | 2955156 | 57.14   | 16.92  | 3.38 |
| hypothetical protein                                                                                                            | 482  | 2003758 | 2003928 | 129.41  | 39.71  | 3.26 |
| Cell surface protein                                                                                                            | 3591 | 2580069 | 2583068 | 52.02   | 16.51  | 3.15 |
| Threonyl-tRNA synthetase (EC 6.1.1.3)                                                                                           | 1969 | 401992  | 403776  | 864.91  | 276.21 | 3.13 |

|                                                                                                                                 |         |         |         |        |        |      |
|---------------------------------------------------------------------------------------------------------------------------------|---------|---------|---------|--------|--------|------|
| hypothetical protein                                                                                                            | 556     | 2217022 | 2217135 | 123.89 | 39.82  | 3.11 |
| Integrase domain protein                                                                                                        | 308     | 2160815 | 2162050 | 51.01  | 16.40  | 3.11 |
| Helix-turn-helix domain protein                                                                                                 | 260     | 1919420 | 1919767 | 40.35  | 12.97  | 3.11 |
| hypothetical protein                                                                                                            | 1517    | 926271  | 926387  | 60.34  | 19.40  | 3.11 |
| hypothetical protein                                                                                                            | 1459    | 867432  | 867587  | 90.32  | 29.03  | 3.11 |
| Putative ABC transport system ATP-binding protein Spermidine Putrescine ABC transporter permease component potB (TC_3.A.1.11.1) | 2826    | 3370491 | 3371162 | 52.16  | 16.77  | 3.11 |
| Sulfate adenylyltransferase subunit 2 (EC 2.7.7.4)                                                                              | 3005    | 3182812 | 3183687 | 63.43  | 20.57  | 3.08 |
| Integration host factor beta subunit                                                                                            | 1732    | 636520  | 637422  | 100.00 | 32.50  | 3.08 |
| Sensory box histidine kinase                                                                                                    | 2492    | 3717890 | 3718210 | 129.69 | 42.19  | 3.07 |
| Histone acetyltransferase HPA2 and related acetyltransferases                                                                   | 2984    | 3203998 | 3205086 | 107.08 | 35.16  | 3.05 |
| Phosphoenolpyruvate phosphomutase (EC 5.4.2.9)                                                                                  | 2776    | 3415136 | 3415642 | 52.37  | 17.79  | 2.94 |
| Biotin-protein ligase (EC 6.3.4.15) / Biotin operon repressor                                                                   | 2217    | 125737  | 127035  | 315.87 | 107.47 | 2.94 |
| Site-specific tyrosine recombinase                                                                                              | 51      | 2429845 | 2430624 | 50.06  | 17.33  | 2.89 |
| V-type ATP synthase subunit K (EC 3.6.3.14)                                                                                     | 3403    | 3708494 | 3709720 | 74.23  | 25.69  | 2.89 |
| hypothetical protein                                                                                                            | 2505    | 2776024 | 2776341 | 123.03 | 42.59  | 2.89 |
| hypothetical protein                                                                                                            | 373     | 2107487 | 2107972 | 52.58  | 18.56  | 2.83 |
| hypothetical protein                                                                                                            | 1128    | 1323574 | 1323696 | 209.02 | 73.77  | 2.83 |
| DNA-binding protein                                                                                                             | 2370    | 3827749 | 3828018 | 70.63  | 25.09  | 2.81 |
| hypothetical protein                                                                                                            | 798     | 1679057 | 1680868 | 52.46  | 18.64  | 2.81 |
| 2-aminoethylphosphonate:pyruvate aminotransferase (EC 2.6.1.37)                                                                 | 2216    | 127046  | 128641  | 245.14 | 87.46  | 2.80 |
| hypothetical protein                                                                                                            | 1954    | 421513  | 421878  | 121.88 | 43.63  | 2.79 |
| amino acid ABC transporter, amino acid-binding protein                                                                          | 1912200 | 1913033 | 1003.00 | 359.24 | 2.79   | 2.79 |
| transposase, mutator family                                                                                                     | 2408    | 3789549 | 3790433 | 92.19  | 33.09  | 2.79 |
| hypothetical protein                                                                                                            | 2291    | 52469   | 52981   | 60.55  | 21.97  | 2.76 |
| Predicted L-rhamnose ABC transporter, substrate-binding component                                                               | 28      | 2454433 | 2455506 | 75.02  | 27.26  | 2.75 |
| Sugar ABC transporter, periplasmic sugar-binding protein USSDB1B                                                                | 2109    | 257351  | 258661  | 117.56 | 42.94  | 2.74 |
| ABC-type nitrate/sulfonate/bicarbonate transport systems, periplasmic components                                                | 1499    | 886456  | 887469  | 188.06 | 68.85  | 2.73 |
| Cell surface protein lsdA, transfers heme from hemoglobin to apo-lsdC                                                           | 1119    | 1333594 | 1335216 | 411.84 | 151.20 | 2.72 |
| Neuraminidase NanP                                                                                                              | 869     | 1594078 | 1595892 | 63.67  | 23.57  | 2.70 |
| Ferric iron ABC transporter, iron-binding protein                                                                               | 649     | 1840118 | 1841098 | 577.04 | 215.82 | 2.67 |
| hypothetical protein                                                                                                            | 1716    | 774604  | 774723  | 50.42  | 18.91  | 2.67 |
| transcriptional regulator, Cro/C1 family                                                                                        | 1597    | 653636  | 653932  | 60.81  | 22.80  | 2.67 |
| ABC-type polar amino acid transport system, ATPase component                                                                    | 562     | 1913775 | 1914530 | 102.65 | 38.74  | 2.65 |
| (2.4.1.25)                                                                                                                      | 2460    | 3733124 | 3735151 | 170.62 | 64.54  | 2.64 |
| Ferric iron ABC transporter, permease protein                                                                                   | 647     | 1841886 | 1843454 | 64.41  | 24.39  | 2.64 |
| Phosphate transport system permease protein pstA (TC 3.A.1.7.1)                                                                 | 2299    | 44130   | 44978   | 56.01  | 21.23  | 2.64 |
| Sensor histidine kinase                                                                                                         | 1661    | 713925  | 715127  | 54.08  | 20.59  | 2.63 |
| hypothetical protein                                                                                                            | 2701    | 3508369 | 3509283 | 103.39 | 39.39  | 2.63 |
| Ribosomal RNA small subunit methyltransferase F (EC 2.1.1.-)                                                                    | 152     | 2332757 | 2333392 | 64.57  | 24.80  | 2.60 |
| hypothetical protein                                                                                                            | 712     | 1769654 | 1770256 | 58.14  | 22.43  | 2.59 |
| Methyl-accepting chemotaxis protein                                                                                             | 2582    | 3621777 | 3623627 | 62.70  | 24.32  | 2.58 |
| hypothetical protein                                                                                                            | 3330    | 2851364 | 2851744 | 76.32  | 29.61  | 2.58 |
| Glycine dehydrogenase [decarboxylating] (glycine cleavage system P2 protein) (EC 1.4.4.2)                                       | 2946    | 3242602 | 3244017 | 130.74 | 50.88  | 2.57 |
| hypothetical protein                                                                                                            | 1348    | 1056627 | 1057235 | 65.79  | 25.90  | 2.54 |
| 4-hydroxybenzoate polyprenyltransferase (EC 2.5.1.-)                                                                            | 2927    | 3264142 | 3265005 | 79.37  | 31.29  | 2.54 |
| Voltage-gated chloride channel                                                                                                  |         | 952873  | 953292  | 53.70  | 21.48  | 2.50 |

|                                                                                                                       |      |         |         |         |        |      |
|-----------------------------------------------------------------------------------------------------------------------|------|---------|---------|---------|--------|------|
| hypothetical protein                                                                                                  | 3309 | 2870079 | 2870615 | 52.24   | 20.99  | 2.49 |
| 6-phosphofructokinase (EC 2.7.1.11)                                                                                   | 3452 | 2730120 | 2731226 | 176.76  | 71.20  | 2.48 |
| RNA polymerase sigma factor RpoE                                                                                      | 1623 | 752159  | 752761  | 73.92   | 29.90  | 2.47 |
| CRISPR-associated protein Cas2                                                                                        | 2809 | 3385765 | 3386040 | 60.00   | 24.55  | 2.44 |
| hypothetical protein                                                                                                  | 521  | 1964041 | 1964163 | 90.16   | 36.89  | 2.44 |
| hypothetical protein                                                                                                  | 3119 | 3720038 | 3720241 | 54.19   | 22.17  | 2.44 |
| Uracil-DNA glycosylase (EC 3.2.2.-)                                                                                   | 2485 | 3065182 | 3065931 | 73.43   | 30.04  | 2.44 |
| hypothetical protein                                                                                                  | 658  | 1832850 | 1833341 | 122.20  | 50.41  | 2.42 |
| hypothetical protein                                                                                                  | 1986 | 386122  | 387522  | 77.86   | 32.14  | 2.42 |
| Probable lipoprotein nlpC precursor                                                                                   | 1588 | 780084  | 781226  | 51.66   | 21.67  | 2.38 |
| Sucrose transport protein                                                                                             | 1316 | 1085710 | 1087008 | 74.35   | 31.20  | 2.38 |
| Nitroreductase family protein                                                                                         | 2844 | 3348824 | 3349330 | 74.11   | 31.13  | 2.38 |
| hypothetical protein                                                                                                  | 3545 | 2637363 | 2638052 | 92.89   | 39.19  | 2.37 |
| Glycine dehydrogenase [decarboxylating] (glycine cleavage system P1 protein) (EC 1.4.4.2)                             | 2947 | 3241283 | 3242605 | 92.66   | 39.15  | 2.37 |
| hypothetical protein                                                                                                  | 3666 | 2493800 | 2494207 | 104.42  | 44.23  | 2.36 |
| diguanylate cyclase/phosphodiesterase (GGDEF & EAL domains) with PAS/PAC sensor(s)                                    | 2856 | 3336747 | 3338282 | 51.79   | 21.99  | 2.36 |
| hypothetical protein                                                                                                  | 2569 | 3636939 | 3638072 | 56.05   | 23.83  | 2.35 |
| hypothetical protein                                                                                                  | 793  | 1686598 | 1687713 | 118.39  | 50.45  | 2.35 |
| Transcriptional repressor of the arabinose operon                                                                     | 2764 | 3425137 | 3426192 | 54.98   | 23.46  | 2.34 |
| Periplasmic sugar-binding proteins                                                                                    | 1964 | 483585  | 484562  | 64.48   | 27.64  | 2.33 |
| ABC transporter, ATP-binding protein                                                                                  | 1872 | 408652  | 409353  | 89.87   | 38.52  | 2.33 |
| hypothetical protein                                                                                                  | 2917 | 3270393 | 3270566 | 150.29  | 65.03  | 2.31 |
| FOG: WD40 repeat                                                                                                      | 1751 | 618744  | 621686  | 56.25   | 24.47  | 2.30 |
| Oxidoreductase, aldo/keto reductase family                                                                            | 1109 | 1346635 | 1347555 | 229.89  | 100.27 | 2.29 |
| Radical SAM domain protein                                                                                            | 2539 | 3669908 | 3670894 | 62.37   | 27.38  | 2.28 |
| possible Bacterial Ig-like domain (group 1)                                                                           | 2635 | 3558194 | 3559915 | 138.58  | 61.45  | 2.26 |
| Sugar diacid utilization regulator SdaR                                                                               | 2281 | 64777   | 65955   | 60.27   | 26.74  | 2.25 |
| tRNA:Cm32/Um32 methyltransferase                                                                                      | 2707 | 3503657 | 3504457 | 150.00  | 67.50  | 2.22 |
| Integrase domain protein                                                                                              | 2017 | 356321  | 357556  | 52.23   | 23.68  | 2.21 |
| Phosphate transport system regulatory protein PhoU                                                                    | 2301 | 42719   | 43375   | 83.08   | 37.73  | 2.20 |
| Rhomboid family protein                                                                                               | 2227 | 118384  | 119025  | 84.24   | 38.61  | 2.18 |
| hypothetical protein                                                                                                  | 794  | 1684166 | 1686637 | 59.49   | 27.32  | 2.18 |
| Aminomethyltransferase (glycine cleavage system T protein) (EC 2.1.2.10)                                              | 2949 | 3239784 | 3240872 | 85.02   | 39.29  | 2.16 |
| Uracil-DNA glycosylase (EC 3.2.2.-)                                                                                   | 1702 | 670578  | 670787  | 162.68  | 75.36  | 2.16 |
| Phosphoadenylyl-sulfate reductase [thioredoxin] (EC 1.8.4.8) / Adenylyl-sulfate reductase [thioredoxin] (EC 1.8.4.10) | 1733 | 635814  | 636512  | 138.97  | 64.47  | 2.16 |
| hypothetical protein                                                                                                  | 2005 | 370696  | 371445  | 1176.90 | 549.73 | 2.14 |
| hypothetical protein                                                                                                  | 2434 | 3765078 | 3765419 | 98.24   | 46.19  | 2.13 |
| Protease IV                                                                                                           | 2523 | 3688680 | 3690314 | 67.32   | 31.67  | 2.13 |
| Sulfate adenylyltransferase subunit 1 (EC 2.7.7.4) / Adenylylsulfate kinase (EC 2.7.1.25)                             | 1731 | 637422  | 638783  | 101.76  | 47.94  | 2.12 |
| Outer membrane autotransporter barrel                                                                                 | 3471 | 2711398 | 2712405 | 75.47   | 35.75  | 2.11 |
| Outer membrane autotransporter barrel                                                                                 | 2107 | 259158  | 261098  | 61.08   | 28.99  | 2.11 |
| Mlr3463 protein                                                                                                       | 3592 | 2578651 | 2580054 | 57.38   | 27.26  | 2.10 |
| Amino acid ABC transporter, permease protein                                                                          | 563  | 1913062 | 1913778 | 328.21  | 157.12 | 2.09 |
| DNA polymerase IV (EC 2.7.7.7)                                                                                        | 1159 | 1268245 | 1269414 | 56.03   | 26.95  | 2.08 |
| hypothetical protein                                                                                                  | 1548 | 836763  | 837005  | 115.70  | 55.79  | 2.07 |
| Ribose 5-phosphate isomerase B (EC 5.3.1.6)                                                                           | 191  | 2294942 | 2295400 | 141.92  | 68.78  | 2.06 |
| Glycine cleavage system H protein                                                                                     | 2948 | 3240902 | 3241273 | 87.60   | 42.45  | 2.06 |
| Probable membrane protein                                                                                             | 2087 | 281376  | 282638  | 55.07   | 26.74  | 2.06 |

|                                                                             |      |         |         |        |        |      |
|-----------------------------------------------------------------------------|------|---------|---------|--------|--------|------|
| Queuosine biosynthesis QueD, PTPS-I / Folate biosynthesis, PTPS-III         |      | 2405466 | 2405840 | 98.93  | 48.13  | 2.06 |
| Transposase IS4 family protein                                              | 75   | 3786399 | 3786647 | 74.60  | 36.29  | 2.06 |
| hypothetical protein                                                        | 751  | 1733113 | 1733274 | 142.86 | 69.88  | 2.04 |
| Multiple polyol-specific dehydrogenase (EC 1.1.1.-)                         | 1998 | 377087  | 378619  | 257.83 | 126.31 | 2.04 |
| hypothetical protein                                                        | 978  | 1486119 | 1487501 | 149.42 | 73.26  | 2.04 |
| Putative sugar transporter                                                  | 1117 | 1336737 | 1338146 | 55.36  | 27.15  | 2.04 |
| Expressed protein                                                           | 3345 | 2832902 | 2834002 | 70.91  | 34.77  | 2.04 |
| Uncharacterized homolog of the cytoplasmic domain of flagellar protein FhIB | 2471 | 3727547 | 3727822 | 214.55 | 106.36 | 2.02 |
| Mov34/MPN/PAD-1                                                             | 1739 | 631201  | 631605  | 201.73 | 100.25 | 2.01 |
| hypothetical protein                                                        |      | 1453041 | 1453355 | 57.32  | 28.66  | 2.00 |
| Inosose dehydratase (EC 4.2.1.44)                                           | 2189 | 716262  | 717086  | 87.38  | 43.69  | 2.00 |
| hypothetical protein                                                        | 1660 | 155208  | 155345  | 65.69  | 32.85  | 2.00 |
| hypothetical protein                                                        | 1008 | 3711218 | 3711727 | 61.89  | 30.94  | 2.00 |
| 5-methyltetrahydrofolate--homocysteine methyltransferase (EC 2.1.1.13)      | 157  | 3698576 | 3699868 | 111.46 | 55.73  | 2.00 |
| Putative pheromone precursor lipoprotein                                    | 2517 | 2326125 | 2326586 | 68.33  | 34.16  | 2.00 |

***T. primitia* genes not expressed in either condition**

| <b>Gene Annotation</b>                              | <b>TREPR #</b> | <b>Start</b> | <b>End</b> |
|-----------------------------------------------------|----------------|--------------|------------|
| hypothetical protein                                |                | 30           | 161        |
| hypothetical protein                                |                | 7658         | 7780       |
| hypothetical protein                                |                | 73023        | 73145      |
| hypothetical protein                                |                | 106760       | 106957     |
| hypothetical protein                                | 128            | 145544       | 145657     |
| hypothetical protein                                |                | 147530       | 147646     |
| hypothetical protein                                | 103            | 173083       | 173208     |
| hypothetical protein                                |                | 184218       | 184370     |
| hypothetical protein                                |                | 191008       | 191130     |
| hypothetical protein                                | 48             | 228903       | 229043     |
| hypothetical protein                                |                | 255438       | 255599     |
| hypothetical protein                                |                | 255731       | 255898     |
| hypothetical protein                                |                | 256006       | 256146     |
| hypothetical protein                                | 25             | 256579       | 256734     |
| hypothetical protein                                |                | 258205       | 258354     |
| Transporter                                         | 18             | 261890       | 262258     |
| hypothetical protein                                | 16             | 262987       | 263124     |
| hypothetical protein                                | 15             | 263087       | 263563     |
| Acetyltransferase                                   | 3889           | 283286       | 284350     |
| hypothetical protein                                | 3885           | 287603       | 287728     |
| hypothetical protein                                | 3884           | 287708       | 287842     |
| hypothetical protein                                |                | 303050       | 303172     |
| hypothetical protein                                | 3865           | 306802       | 307545     |
| hypothetical protein                                |                | 341829       | 342008     |
| Iron-sulfur cluster-binding protein                 | 3830           | 341995       | 342807     |
| hypothetical protein                                |                | 405639       | 405773     |
| hypothetical protein                                |                | 427534       | 427674     |
| hypothetical protein                                |                | 434604       | 434732     |
| hypothetical protein                                | 3741           | 436464       | 437312     |
| hypothetical protein                                |                | 440532       | 440726     |
| putative protein family member (5Q829)              | 3736           | 440746       | 441336     |
| Alpha-1,2-fucosyltransferase                        | 3735           | 441373       | 442269     |
| Maltose O-acetyltransferase (EC 2.3.1.79)           | 3733           | 443190       | 443801     |
| hypothetical protein                                |                | 449427       | 449543     |
| hypothetical protein                                |                | 465706       | 465858     |
| hypothetical protein                                |                | 469531       | 469746     |
| hypothetical protein                                |                | 471126       | 471245     |
| hypothetical protein                                | 3686           | 481547       | 482122     |
| hypothetical protein                                | 3675           | 487699       | 488451     |
| hypothetical protein                                | 3666           | 498068       | 498187     |
| hypothetical protein                                | 3658           | 504668       | 504820     |
| hypothetical protein                                | 3647           | 516099       | 516812     |
| hypothetical protein                                | 3646           | 516799       | 517347     |
| hypothetical protein                                | 3645           | 517388       | 517780     |
| hypothetical protein                                | 3631           | 531804       | 531962     |
| hypothetical protein                                | 3628           | 536985       | 537122     |
| hypothetical protein                                |                | 576489       | 576620     |
| hypothetical protein                                |                | 581904       | 582074     |
| Oligopeptide transport system permease protein oppB | 3542           | 624245       | 625225     |

|                                                 |      |         |         |
|-------------------------------------------------|------|---------|---------|
| hypothetical protein                            | 3539 | 628867  | 629118  |
| hypothetical protein                            |      | 723582  | 723695  |
| hypothetical protein                            | 3436 | 723789  | 723938  |
| hypothetical protein                            |      | 784264  | 784377  |
| hypothetical protein                            | 3380 | 787773  | 787889  |
| amino acid ABC transporter, permease protein    | 3346 | 814269  | 814967  |
| amino acid ABC transporter, ATP-binding protein | 3337 | 821623  | 822381  |
| hypothetical protein                            |      | 874542  | 874673  |
| hypothetical protein                            | 3246 | 911792  | 912013  |
| hypothetical protein                            |      | 912101  | 912235  |
| hypothetical protein                            |      | 921188  | 921370  |
| hypothetical protein                            | 3231 | 922468  | 922587  |
| hypothetical protein                            |      | 929981  | 930226  |
| hypothetical protein                            |      | 951703  | 951843  |
| hypothetical protein                            | 3199 | 954695  | 954895  |
| hypothetical protein                            | 3195 | 959256  | 959384  |
| hypothetical protein                            | 3128 | 1037378 | 1037512 |
| hypothetical protein                            | 3106 | 1061036 | 1061209 |
| hypothetical protein                            | 3085 | 1076276 | 1076404 |
| hypothetical protein                            | 3019 | 1149448 | 1149540 |
| hypothetical protein                            |      | 1237088 | 1237201 |
| hypothetical protein                            | 2892 | 1293760 | 1293888 |
| hypothetical protein                            |      | 1293903 | 1294022 |
| hypothetical protein                            |      | 1311493 | 1311648 |
| hypothetical protein                            | 2802 | 1367736 | 1367996 |
| hypothetical protein                            |      | 1396746 | 1396886 |
| hypothetical protein                            | 2752 | 1426040 | 1426207 |
| hypothetical protein                            | 2748 | 1429972 | 1430109 |
| hypothetical protein                            | 2713 | 1466276 | 1466614 |
| hypothetical protein                            | 2703 | 1477034 | 1477240 |
| hypothetical protein                            | 2664 | 1512784 | 1513290 |
| hypothetical protein                            |      | 1589540 | 1590019 |
| hypothetical protein                            | 2593 | 1592674 | 1592817 |
| hypothetical protein                            | 2592 | 1592932 | 1593168 |
| hypothetical protein                            | 2591 | 1593161 | 1593586 |
| Exonuclease SbcC                                | 2590 | 1593849 | 1594610 |
| hypothetical protein                            | 2577 | 1608181 | 1608327 |
| hypothetical protein                            |      | 1722807 | 1722929 |
| hypothetical protein                            | 2304 | 1927527 | 1927649 |
| hypothetical protein                            | 2293 | 1942558 | 1942677 |
| hypothetical protein                            | 2284 | 1950800 | 1951021 |
| ATPase                                          | 2271 | 1965740 | 1965997 |
| hypothetical protein                            | 2272 | 1965994 | 1966125 |
| hypothetical protein                            | 2266 | 1973172 | 1973393 |
| hypothetical protein                            | 2262 | 1976879 | 1977214 |
| hypothetical protein                            | 2261 | 1977204 | 1977425 |
| hypothetical protein                            |      | 1983527 | 1983667 |
| hypothetical protein                            | 2246 | 1991844 | 1991969 |
| hypothetical protein                            |      | 2032504 | 2032671 |
| hypothetical protein                            |      | 2038758 | 2038895 |
| hypothetical protein                            | 2197 | 2040638 | 2040976 |

|                                      |      |         |         |
|--------------------------------------|------|---------|---------|
| hypothetical protein                 | 2194 | 2043079 | 2043630 |
| hypothetical protein                 | 2193 | 2043631 | 2043912 |
| hypothetical protein                 | 2192 | 2043872 | 2044159 |
| hypothetical protein                 | 2190 | 2044429 | 2044596 |
| hypothetical protein                 | 2189 | 2044599 | 2045153 |
| hypothetical protein                 | 2188 | 2045275 | 2045541 |
| hypothetical protein                 | 2184 | 2048338 | 2048946 |
| hypothetical protein                 |      | 2054605 | 2054760 |
| hypothetical protein                 |      | 2054991 | 2055116 |
| hypothetical protein                 | 2170 | 2057000 | 2057131 |
| hypothetical protein                 | 2167 | 2058030 | 2058143 |
| hypothetical protein                 |      | 2059682 | 2059807 |
| probable methyltransferase           | 2164 | 2059780 | 2060406 |
| Plasmid stabilization system protein | 2159 | 2061994 | 2062329 |
| hypothetical protein                 |      | 2075840 | 2075953 |
| hypothetical protein                 | 2132 | 2088512 | 2088625 |
| hypothetical protein                 | 2119 | 2099859 | 2100074 |
| hypothetical protein                 | 2118 | 2100543 | 2100677 |
| hypothetical protein                 | 2117 | 2100720 | 2100836 |
| hypothetical protein                 |      | 2100860 | 2101660 |
| hypothetical protein                 |      | 2111964 | 2112083 |
| hypothetical protein                 | 2107 | 2112721 | 2113329 |
| hypothetical protein                 | 2106 | 2113361 | 2113807 |
| hypothetical protein                 | 2103 | 2116166 | 2116393 |
| hypothetical protein                 |      | 2118258 | 2118389 |
| hypothetical protein                 | 2093 | 2122946 | 2123059 |
| hypothetical protein                 |      | 2123260 | 2123388 |
| hypothetical protein                 | 2090 | 2123916 | 2124044 |
| hypothetical protein                 | 2088 | 2124457 | 2124657 |
| hypothetical protein                 | 2087 | 2124746 | 2125018 |
| ORF009                               | 2085 | 2125575 | 2126795 |
| Phage portal protein, HK97           | 2084 | 2126792 | 2128021 |
| Probable prohead protease            | 2082 | 2128720 | 2129388 |
| Major capsid protein, HK97 family    | 2081 | 2129457 | 2130758 |
| Phage integrase                      | 2080 | 2130883 | 2132121 |
| hypothetical protein                 | 2058 | 2184901 | 2185020 |
| hypothetical protein                 | 2055 | 2185960 | 2186085 |
| hypothetical protein                 |      | 2186124 | 2186282 |
| hypothetical protein                 | 2051 | 2188032 | 2188367 |
| hypothetical protein                 | 2047 | 2191584 | 2191967 |
| hypothetical protein                 | 2041 | 2195534 | 2195968 |
| hypothetical protein                 | 2040 | 2195992 | 2196588 |
| hypothetical protein                 |      | 2196673 | 2196831 |
| hypothetical protein                 | 2036 | 2198728 | 2199282 |
| hypothetical protein                 | 2035 | 2199304 | 2199582 |
| hypothetical protein                 | 2034 | 2199809 | 2200576 |
| hypothetical protein                 |      | 2200786 | 2200938 |
| hypothetical protein                 | 2032 | 2201133 | 2201549 |
| hypothetical protein                 |      | 2202080 | 2202214 |
| hypothetical protein                 | 2021 | 2215828 | 2215953 |
| hypothetical protein                 |      | 2216482 | 2216640 |

|                                                      |      |         |         |
|------------------------------------------------------|------|---------|---------|
| hypothetical protein                                 | 2019 | 2216641 | 2216970 |
| hypothetical protein                                 | 2018 | 2217029 | 2217448 |
| ORF009                                               | 2013 | 2221495 | 2222730 |
| hypothetical protein                                 |      | 2225626 | 2225766 |
| hypothetical protein                                 |      | 2277938 | 2278078 |
| hypothetical protein                                 |      | 2353763 | 2353894 |
| hypothetical protein                                 | 1899 | 2353882 | 2354517 |
| hypothetical protein                                 | 1896 | 2358212 | 2358688 |
| hypothetical protein                                 |      | 2365134 | 2365304 |
| hypothetical protein                                 | 1888 | 2365308 | 2365517 |
| hypothetical protein                                 | 1887 | 2365565 | 2365750 |
| hypothetical protein                                 | 1886 | 2365803 | 2366042 |
| Flagellar motor switch protein flmM                  | 1885 | 2366044 | 2366628 |
| hypothetical protein                                 | 1883 | 2369624 | 2370436 |
| hypothetical protein                                 |      | 2371901 | 2372035 |
| hypothetical protein                                 | 1874 | 2377801 | 2377938 |
| hypothetical protein                                 |      | 2379059 | 2379190 |
| hypothetical protein                                 | 1870 | 2379788 | 2379907 |
| hypothetical protein                                 | 1869 | 2380202 | 2380645 |
| hypothetical protein                                 |      | 2380700 | 2380822 |
| hypothetical protein                                 |      | 2384580 | 2384699 |
| hypothetical protein                                 |      | 2410420 | 2410527 |
| hypothetical protein                                 |      | 2478720 | 2478875 |
| hypothetical protein                                 |      | 2559089 | 2559232 |
| hypothetical protein                                 | 1706 | 2559235 | 2559414 |
| hypothetical protein                                 | 1697 | 2566847 | 2566966 |
| hypothetical protein                                 | 1674 | 2590171 | 2590293 |
| hypothetical protein                                 |      | 2673814 | 2673930 |
| hypothetical protein                                 |      | 2694453 | 2694605 |
| hypothetical protein                                 |      | 2741398 | 2741547 |
| hypothetical protein                                 | 1536 | 2761830 | 2761958 |
| hypothetical protein                                 |      | 2787281 | 2787394 |
| hypothetical protein                                 | 1436 | 2854711 | 2854950 |
| hypothetical protein                                 | 1433 | 2856340 | 2856606 |
| hypothetical protein                                 | 1432 | 2856966 | 2857139 |
| hypothetical protein                                 |      | 2857119 | 2857247 |
| hypothetical protein                                 | 1429 | 2857787 | 2858029 |
| Leader peptidase (Prepilin peptidase) (EC 3.4.23.43) | 1398 | 2898642 | 2899076 |
| General secretion pathway protein E                  | 1396 | 2901255 | 2902757 |
| Type 4 fimbrial assembly protein pilC                | 1395 | 2902757 | 2903812 |
| hypothetical protein                                 | 1393 | 2904278 | 2904505 |
| hypothetical protein                                 | 1391 | 2905016 | 2906020 |
| hypothetical protein                                 | 1390 | 2905998 | 2907152 |
| hypothetical protein                                 | 1389 | 2907172 | 2907660 |
| hypothetical protein                                 | 1387 | 2908225 | 2908890 |
| hypothetical protein                                 | 1327 | 2984646 | 2984771 |
| hypothetical protein                                 |      | 3007994 | 3008113 |
| hypothetical protein                                 |      | 3017845 | 3017988 |
| hypothetical protein                                 |      | 3048769 | 3048906 |
| aminoglycoside 6-adenylyltransferase                 | 1245 | 3083514 | 3083774 |
| hypothetical protein                                 | 1244 | 3083782 | 3084093 |



|                                                 |      |         |         |
|-------------------------------------------------|------|---------|---------|
| hypothetical protein                            | 1242 | 3084517 | 3085089 |
| hypothetical protein                            | 1187 | 3132410 | 3132550 |
| hypothetical protein                            | 1137 | 3177664 | 3177795 |
| 5'-nucleotidase (EC 3.1.3.5)                    | 1134 | 3180348 | 3182177 |
| hypothetical protein                            | 1113 | 3203606 | 3203863 |
| hypothetical protein                            |      | 3241610 | 3241732 |
| hypothetical protein                            | 1045 | 3275215 | 3275850 |
| hypothetical protein                            | 1042 | 3277673 | 3277840 |
| hypothetical protein                            |      | 3319904 | 3320152 |
| hypothetical protein                            |      | 3320163 | 3320324 |
| hypothetical protein                            | 992  | 3334892 | 3335011 |
| hypothetical protein                            | 951  | 3377624 | 3377755 |
| hypothetical protein                            | 947  | 3382231 | 3382392 |
| hypothetical protein                            | 909  | 3421167 | 3422387 |
| hypothetical protein                            | 908  | 3422537 | 3422725 |
| hypothetical protein                            | 907  | 3423523 | 3423699 |
| hypothetical protein                            |      | 3424581 | 3424718 |
| DNA repair protein RadC                         | 898  | 3433297 | 3433764 |
| hypothetical protein                            | 895  | 3435542 | 3435766 |
| hypothetical protein                            | 894  | 3435756 | 3436004 |
| hypothetical protein                            | 891  | 3437378 | 3437587 |
| hypothetical protein                            | 888  | 3439198 | 3439968 |
| Single-stranded DNA-binding protein             | 887  | 3440033 | 3440428 |
| hypothetical protein                            | 885  | 3441316 | 3441705 |
| hypothetical protein                            | 880  | 3443465 | 3444061 |
| hypothetical protein                            | 876  | 3445955 | 3446086 |
| hypothetical protein                            | 877  | 3446059 | 3446307 |
| hypothetical protein                            | 863  | 3457088 | 3457390 |
| hypothetical protein                            |      | 3509185 | 3509301 |
| hypothetical protein                            | 752  | 3558501 | 3558662 |
| Gsl2900 protein                                 | 742  | 3572877 | 3573077 |
| hypothetical protein                            |      | 3576080 | 3576268 |
| hypothetical protein                            | 712  | 3604228 | 3604353 |
| Oligopeptide transport ATP-binding protein oppD | 674  | 3642310 | 3643341 |
| hypothetical protein                            | 654  | 3667715 | 3667828 |
| Type II restriction enzyme BsuBI (EC 3.1.21.4)  | 652  | 3668937 | 3669338 |
| hypothetical protein                            |      | 3681307 | 3681543 |
| hypothetical protein                            |      | 3705357 | 3705491 |
| hypothetical protein                            | 618  | 3705845 | 3706693 |
| Bacterial regulatory proteins, AsnC family      | 576  | 3751484 | 3751720 |
| hypothetical protein                            | 458  | 3882029 | 3882406 |
| hypothetical protein                            | 457  | 3882409 | 3882678 |
| hypothetical protein                            |      | 3906199 | 3906342 |
| hypothetical protein                            |      | 3918834 | 3918953 |
| hypothetical protein                            | 415  | 3921264 | 3921494 |

***T. azotonutricium* genes not expressed in either condition**

| <b>Gene Annotation</b> | <b>TREAZ #</b> | <b>Start</b> | <b>End</b> |
|------------------------|----------------|--------------|------------|
| hypothetical protein   | 2311           | 32157        | 32477      |
| hypothetical protein   | 1995           | 380204       | 380326     |
| hypothetical protein   | 1748           | 623360       | 623500     |
| hypothetical protein   | 1695           | 677905       | 678018     |

|                        |      |         |         |
|------------------------|------|---------|---------|
| hypothetical protein   | 1693 | 680380  | 680502  |
| hypothetical protein   | 1671 | 708742  | 708867  |
| hypothetical protein   | 1670 | 708870  | 709061  |
| hypothetical protein   | 1664 | 712461  | 712595  |
| hypothetical protein   | 1646 | 733842  | 733964  |
| hypothetical protein   | 1485 | 899391  | 899528  |
| hypothetical protein   |      | 940960  | 941085  |
| hypothetical protein   | 1443 | 941158  | 941277  |
| hypothetical protein   | 1244 | 1163639 | 1163770 |
| hypothetical protein   | 1183 | 1239332 | 1239541 |
| hypothetical protein   | 1161 | 1267167 | 1267298 |
| hypothetical protein   | 1056 | 1406968 | 1407099 |
| hypothetical protein   | 977  | 1487534 | 1487647 |
| hypothetical protein   | 813  | 1661588 | 1661716 |
| hypothetical protein   | 812  | 1661762 | 1662304 |
| hypothetical protein   | 778  | 1702265 | 1702399 |
| hypothetical protein   | 713  | 1769399 | 1769518 |
| hypothetical protein   | 604  | 1872659 | 1872850 |
| hypothetical protein   | 597  | 1878392 | 1878595 |
| hypothetical protein   |      | 1884397 | 1884531 |
| hypothetical protein   | 560  | 1916445 | 1916558 |
| hypothetical protein   | 520  | 1964271 | 1964387 |
| hypothetical protein   | 499  | 1983160 | 1983306 |
| hypothetical protein   | 497  | 1985482 | 1985613 |
| hypothetical protein   | 374  | 2107329 | 2107487 |
| hypothetical protein   | 362  | 2114030 | 2114272 |
| hypothetical protein   | 358  | 2117205 | 2117591 |
| hypothetical protein   | 319  | 2149442 | 2149684 |
| hypothetical protein   | 313  | 2154900 | 2155031 |
| hypothetical protein   | 309  | 2160286 | 2160408 |
| Transposase IS4 family |      | 2363437 | 2363610 |
| hypothetical protein   | 3444 | 2739039 | 2739155 |
| hypothetical protein   | 3363 | 2816088 | 2816225 |
| hypothetical protein   | 3120 | 3064981 | 3065142 |
| hypothetical protein   | 3070 | 3124117 | 3124284 |
| hypothetical protein   | 3069 | 3124659 | 3124784 |
| hypothetical protein   | 2988 | 3201792 | 3201938 |
| hypothetical protein   | 2936 | 3254441 | 3254605 |
| hypothetical protein   | 2685 | 3524255 | 3524380 |
| hypothetical protein   | 2564 | 3640681 | 3640803 |
| hypothetical protein   | 2419 | 3780402 | 3780608 |

|                                              | <i>T. primitia</i><br>sample A | <i>T. primitia</i><br>sample B | <i>T. azotonutricium</i><br>sample A | <i>T. azotonutricium</i><br>sample B | co-culture<br>sample A | co-culture<br>sample B |
|----------------------------------------------|--------------------------------|--------------------------------|--------------------------------------|--------------------------------------|------------------------|------------------------|
| Total sequences                              | 15151014                       | 14267420                       | 13194946                             | 13523348                             | 13878935               | 12565943               |
| Mapped sequences                             | 13633119                       | 11749745                       | 11215221                             | 11661398                             | 11882471               | 11379324               |
| Sequences mapping to<br>non 16S or 23S genes | 427444                         | 595988                         | 380752                               | 519125                               | 789755                 | 594670                 |

| <i>T. primitia</i>                                                                                                    |         |       |       | Normalized Avg. RNA-Seq |            |         |
|-----------------------------------------------------------------------------------------------------------------------|---------|-------|-------|-------------------------|------------|---------|
|                                                                                                                       | TREPR # | Start | End   | Single Culture          | Co-Culture | Ratio   |
| hypothetical protein                                                                                                  |         | 30    | 161   | 0                       | 0          | #DIV/0! |
| Chromosomal replication initiator protein dnaA                                                                        | 277     | 301   | 1740  | 66.71299514             | 62.7230716 | 0.94019 |
| hypothetical protein                                                                                                  | 276     | 1755  | 1925  | 11.76470588             | 5.47352941 | 0.46525 |
| DNA polymerase III beta subunit (EC 2.7.7.7)                                                                          | 275     | 1938  | 3041  | 208.5222121             | 124.010426 | 0.59471 |
| DNA recombination and repair protein RecF                                                                             | 274     | 3065  | 4174  | 85.66275924             | 62.0892696 | 0.72481 |
| Uncharacterized protein TP_0004                                                                                       | 273     | 4171  | 4749  | 77.85467128             | 88.5423875 | 1.13728 |
| hypothetical protein                                                                                                  | 272     | 4753  | 5961  | 106.7880795             | 70.865894  | 0.66361 |
| hypothetical protein                                                                                                  | 271     | 6003  | 6791  | 121.8274112             | 164.136421 | 1.34729 |
| UPF0088 protein TP_0032                                                                                               | 270     | 6801  | 7661  | 51.1627907              | 58.4267442 | 1.14198 |
| hypothetical protein                                                                                                  |         | 7658  | 7780  | 0                       | 0          | #DIV/0! |
| Ribose ABC transport system, ATP-binding protein RbsA (TC 3.A.1.2.1)                                                  | 268     | 7765  | 9312  | 29.73497091             | 19.8490627 | 0.66753 |
| Ribose ABC transport system, permease protein RbsC (TC 3.A.1.2.1)                                                     | 267     | 9328  | 10293 | 25.90673575             | 15.4279793 | 0.59552 |
| Ribose ABC transporter, periplasmic ribose-binding protein rbsB (TC 3.A.1.2.1)                                        | 266     | 10349 | 11290 | 195.5366631             | 105.806057 | 0.54111 |
| Ribose operon repressor                                                                                               | 265     | 11325 | 12350 | 18.53658537             | 25.4185366 | 1.37126 |
| Threonine synthase (EC 4.2.3.1)                                                                                       | 264     | 12439 | 13743 | 124.2331288             | 74.2116564 | 0.59736 |
| Mechanosensitive ion channel family protein                                                                           | 263     | 13765 | 15291 | 24.24639581             | 21.9515072 | 0.90535 |
| Porphobilinogen synthase (EC 4.2.1.24)                                                                                | 262     | 15317 | 16303 | 136.9168357             | 235.927992 | 1.72315 |
| Uroporphyrinogen-III methyltransferase (EC 2.1.1.107) / Uroporphyrinogen-III synthase (EC 4.2.1.75)                   | 261     | 16304 | 17884 | 132.9113924             | 153.709177 | 1.15648 |
| Porphobilinogen deaminase (EC 2.5.1.61)                                                                               | 260     | 17881 | 18882 | 85.91408591             | 152.44955  | 1.77444 |
| Siroheme synthase / Precorrin-2 oxidase (EC 1.3.1.76)                                                                 | 259     | 18879 | 19457 | 129.7577855             | 183.524221 | 1.41436 |
| Mov34/MPN/PAD-1                                                                                                       | 258     | 19459 | 19863 | 257.4257426             | 343.179455 | 1.33312 |
| ThiS, thiamine-biosynthesis                                                                                           | 257     | 19857 | 20129 | 375                     | 335.253676 | 0.89401 |
| Threonine synthase (EC 4.2.3.1)                                                                                       | 256     | 20160 | 21362 | 6.655574043             | 9.28951747 | 1.39575 |
| Sulfate-binding protein sbp                                                                                           | 255     | 21474 | 22541 | 8.434864105             | 8.72071228 | 1.03389 |
| Sulfate transport system permease protein cysT                                                                        | 254     | 22551 | 23396 | 6.00240096              | 3.35114046 | 0.5583  |
| Sulfate transport system permease protein cysW                                                                        | 253     | 23393 | 24238 | 1.183431953             | 1.10118343 | 0.9305  |
| Sulfate and thiosulfate import ATP-binding protein cysA (EC 3.6.3.25)                                                 | 252     | 24250 | 25317 | 2.811621368             | 3.48828491 | 1.24067 |
| Phosphoadenylyl-sulfate reductase [thioredoxin] (EC 1.8.4.8) / Adenylyl-sulfate reductase [thioredoxin] (EC 1.8.4.10) | 251     | 25307 | 26017 | 30.98591549             | 30.1429577 | 0.9728  |
| Sulfate adenylyltransferase subunit 2 (EC 2.7.7.4)                                                                    | 250     | 26014 | 26910 | 58.1655481              | 58.2863535 | 1.00208 |
| Sulfate adenylyltransferase subunit 1 (EC 2.7.7.4) / Adenylylsulfate kinase (EC 2.7.1.25)                             | 249     | 26910 | 28295 | 29.60288809             | 32.2483755 | 1.08937 |
| Nitrogenase iron protein (EC 1.18.6.1)                                                                                | 248     | 28502 | 29380 | 15.9453303              | 21.1958998 | 1.32929 |
| Nitrogenase molybdenum-iron protein alpha chain (EC 1.18.6.1)                                                         | 247     | 29477 | 30799 | 8.320726172             | 5.63086233 | 0.67673 |
| Nitrogenase (EC 1.18.6.1)                                                                                             | 246     | 30802 | 32160 | 16.93667158             | 15.7595729 | 0.9305  |
| Dinucleotide-utilizing enzymes involved in molybdopterin and thiamine biosynthesis family 2                           | 245     | 32180 | 33028 | 108.490566              | 158.009434 | 1.45643 |

|                                                                                                          |     |       |       |             |            |         |
|----------------------------------------------------------------------------------------------------------|-----|-------|-------|-------------|------------|---------|
| hypothetical protein                                                                                     | 244 | 33039 | 33293 | 149.6062992 | 157.525591 | 1.05293 |
| Dissimilatory sulfite reductase (desulfoviridin),<br>alpha and beta subunits                             | 243 | 33290 | 34156 | 91.22401848 | 104.224596 | 1.14251 |
| tRNA nucleotidyltransferase (EC 2.7.7.25)                                                                | 242 | 34257 | 35549 | 37.92569659 | 38.8908669 | 1.02545 |
| Alpha amylase                                                                                            | 241 | 35628 | 39512 | 171.9876416 | 182.07518  | 1.05865 |
| 4-alpha-glucanotransferase (amylomaltase) (EC<br>2.4.1.25)                                               | 240 | 39525 | 41555 | 149.1358025 | 135.554321 | 0.90893 |
| Membrane spanning protein                                                                                | 239 | 41722 | 43269 | 22.62443439 | 23.4579832 | 1.03684 |
| Nitrogen regulatory protein P-II                                                                         | 238 | 43256 | 43966 | 57.74647887 | 31.4535211 | 0.54468 |
| nodulin 21-related protein                                                                               | 237 | 43968 | 44837 | 44.87917146 | 44.972382  | 1.00208 |
| Ribose ABC transport system, permease protein<br>RbsC (TC 3.A.1.2.1)                                     | 236 | 44906 | 45814 | 20.92511013 | 29.7186123 | 1.42024 |
| Ribose ABC transport system, permease protein<br>RbsC (TC 3.A.1.2.1)                                     | 235 | 45811 | 46911 | 15.45454545 | 16.9181818 | 1.09471 |
| Predicted nucleoside ABC transporter, ATP-<br>binding component                                          | 234 | 46904 | 48457 | 18.67353509 | 35.9497746 | 1.92517 |
| Membrane lipoprotein TpN38(b) precursor                                                                  | 233 | 48491 | 49579 | 41.36029412 | 66.7086397 | 1.61287 |
| hypothetical protein                                                                                     | 232 | 49751 | 49864 | 35.39823009 | 24.7035398 | 0.69788 |
| Cytochrome c-type biogenesis protein ResA                                                                | 231 | 49877 | 50491 | 17.91530945 | 27.2785016 | 1.52264 |
| Cytochrome c-type biogenesis protein DsbD,<br>protein-disulfide reductase (EC 1.8.1.8)                   | 230 | 50526 | 51497 | 15.44799176 | 27.7904222 | 1.79897 |
| O-acetylhomoserine sulfhydrylase (EC 4.2.99.10)<br>/ O-succinylhomoserine sulfhydrylase (EC<br>4.2.99.9) | 229 | 51714 | 53819 | 203.236554  | 236.500238 | 1.16367 |
| hypothetical protein                                                                                     | 228 | 54022 | 54408 | 2.590673575 | 0          | 0       |
| Adenylosuccinate lyase (EC 4.3.2.2)                                                                      | 227 | 54448 | 55920 | 108.8435374 | 132.295578 | 1.21547 |
| Inosine-5'-monophosphate dehydrogenase (EC<br>1.1.1.205)                                                 | 226 | 55944 | 57380 | 137.1866295 | 147.091574 | 1.0722  |
| hypothetical protein                                                                                     | 225 | 57401 | 58033 | 99.6835443  | 78.0324367 | 0.7828  |
| Lactoylglutathione lyase (EC 4.4.1.5)                                                                    | 224 | 58035 | 58421 | 64.76683938 | 74.7292746 | 1.15382 |
| 4-alpha-glucanotransferase (amylomaltase) (EC<br>2.4.1.25)                                               | 223 | 58517 | 60043 | 150.0655308 | 164.636304 | 1.0971  |
| Multiple sugar ABC transporter, membrane-<br>spanning permease protein MsmG                              | 222 | 60048 | 60902 | 179.1569087 | 201.572014 | 1.12511 |
| Multiple sugar ABC transporter, membrane-<br>spanning permease protein MsmF                              | 221 | 60899 | 61741 | 197.1496437 | 163.555819 | 0.8296  |
| Multiple sugar ABC transporter, substrate-binding<br>protein                                             | 220 | 61820 | 63142 | 338.1240545 | 375.860061 | 1.1116  |
| Adenylosuccinate synthetase (EC 6.3.4.4)                                                                 | 219 | 63334 | 64566 | 193.9935065 | 166.160714 | 0.85653 |
| GMP synthase [glutamine-hydrolyzing] (EC<br>6.3.5.2)                                                     | 218 | 64646 | 66319 | 106.993425  | 101.782128 | 0.95129 |
| hypothetical protein                                                                                     | 217 | 66589 | 66819 | 286.9565217 | 258.921739 | 0.9023  |
| hypothetical protein                                                                                     | 216 | 66816 | 67217 | 122.1945137 | 64.9725686 | 0.53171 |
| hypothetical protein                                                                                     | 215 | 67265 | 68143 | 234.6241458 | 207.719818 | 0.88533 |
| hypothetical protein                                                                                     | 214 | 68140 | 68823 | 308.9311859 | 321.519766 | 1.04075 |
| Virulence associated protein B                                                                           | 213 | 68933 | 69157 | 49.10714286 | 29.078125  | 0.59214 |
| VapC toxin protein                                                                                       | 212 | 69120 | 69557 | 34.32494279 | 19.1636156 | 0.5583  |
| hypothetical protein                                                                                     | 211 | 69569 | 69706 | 36.49635036 | 67.919708  | 1.861   |
| dTDP-glucose 4,6-dehydratase (EC 4.2.1.46)                                                               | 210 | 69853 | 70815 | 336.7983368 | 287.274948 | 0.85296 |
| Flippase                                                                                                 | 209 | 70859 | 72220 | 12.49081558 | 9.5716385  | 0.76629 |
| SAM-dependent methyltransferase (EC 2.1.1.-)                                                             | 207 | 72221 | 73042 | 35.3227771  | 6.80024361 | 0.19252 |

|                                                                                      |     |        |        |             |            |         |
|--------------------------------------------------------------------------------------|-----|--------|--------|-------------|------------|---------|
| hypothetical protein                                                                 |     | 73023  | 73145  | 0           | 0          | #DIV/0! |
| Conserved domain protein                                                             |     | 73099  | 73509  | 9.756097561 | 2.2695122  | 0.23263 |
| hypothetical protein                                                                 |     | 73490  | 73669  | 5.586592179 | 0          | 0       |
| Conserved domain protein                                                             |     | 73733  | 73990  | 35.01945525 | 21.7237354 | 0.62033 |
| Glycosyl transferase, group 2 family protein                                         | 203 | 74016  | 75029  | 29.61500494 | 30.3124383 | 1.02355 |
| dTDP-4-dehydrorhamnose reductase (EC 1.1.1.133)                                      | 202 | 75026  | 75928  | 89.80044346 | 39.2006652 | 0.43653 |
| capsular polysaccharide biosynthesis protein                                         | 201 | 75939  | 77114  | 8.510638298 | 3.95957447 | 0.46525 |
| Glycosyltransferase                                                                  | 200 | 77215  | 78372  | 9.507346586 | 10.4550562 | 1.09968 |
| hypothetical protein                                                                 | 199 | 78445  | 78570  | 64          | 74.44      | 1.16313 |
| hypothetical protein                                                                 |     | 78581  | 78751  | 58.82352941 | 5.47352941 | 0.09305 |
| hypothetical protein                                                                 |     | 78818  | 79132  | 130.5732484 | 53.3407643 | 0.40851 |
| HlpA protein                                                                         | 196 | 79190  | 80074  | 62.21719457 | 44.209276  | 0.71056 |
| Glycosyltransferase                                                                  | 195 | 80146  | 81249  | 23.57207616 | 11.8105168 | 0.50104 |
| Beta-1,3-galactosyltransferase / Beta-1,4-galactosyltransferase                      | 194 | 81253  | 82020  | 24.77183833 | 9.7053455  | 0.39179 |
| Tyrosine-protein kinase wzc (EC 2.7.1.112)                                           | 193 | 82437  | 83168  | 80.71135431 | 81.4664843 | 1.00936 |
| Capsule polysaccharide export protein                                                | 192 | 83165  | 84631  | 103.6834925 | 105.998295 | 1.02233 |
| hypothetical protein                                                                 | 191 | 84721  | 85575  | 15.22248244 | 7.62704918 | 0.50104 |
| Phosphoglycerol transferase I (EC 2.7.8.20)                                          | 190 | 85559  | 87334  | 27.6056338  | 13.1056338 | 0.47474 |
| hypothetical protein                                                                 | 189 | 87419  | 87814  | 0           | 2.3556962  | #DIV/0! |
| hypothetical protein                                                                 | 188 | 87811  | 88050  | 0           | 7.78661088 | #DIV/0! |
| hypothetical protein                                                                 | 187 | 88147  | 88434  | 62.71777003 | 16.2108014 | 0.25847 |
| hypothetical protein                                                                 | 186 | 88431  | 88814  | 7.832898172 | 4.85900783 | 0.62033 |
| Branched-chain amino acid ABC transporter, amino acid-binding protein (TC 3.A.1.4.1) | 185 | 89156  | 90346  | 137.8151261 | 186.1      | 1.35036 |
| FOG: GGDEF domain                                                                    | 184 | 90446  | 91513  | 59.04404873 | 50.5801312 | 0.85665 |
|                                                                                      |     |        |        |             |            |         |
| sensory box histidine kinase/response regulator                                      | 183 | 91482  | 92903  | 81.63265306 | 56.9693878 | 0.69788 |
| Molybdopterin-guanine dinucleotide biosynthesis protein B                            | 182 | 92921  | 93436  | 100.9708738 | 106.600971 | 1.05576 |
| 4-hydroxybenzoyl-CoA thioesterase family active site                                 | 181 | 93435  | 93890  | 105.4945055 | 81.8021978 | 0.77542 |
| Transglutaminase-like domain protein                                                 | 180 | 93895  | 97914  | 42.54789749 | 67.3738492 | 1.58348 |
| hypothetical protein                                                                 | 179 | 97892  | 99085  | 59.51383068 | 85.0163453 | 1.42851 |
| methanol dehydrogenase regulatory protein                                            | 178 | 99054  | 100004 | 126.3157895 | 163.572105 | 1.29495 |
| hypothetical protein                                                                 | 177 | 100170 | 101258 | 297.7941176 | 318.148897 | 1.06835 |
| Diaphanous protein homolog 2                                                         | 176 | 101409 | 102164 | 294.0397351 | 415.335762 | 1.41252 |
| Intergenic (EXPRESSED)                                                               |     | 102165 | 102563 | 3028.350515 | 2774.71263 | 0.91625 |
| Long-chain-fatty-acid--CoA ligase (EC 6.2.1.3)                                       | 175 | 102564 | 104477 | 66.38787245 | 80.257449  | 1.20892 |
| hypothetical protein                                                                 | 174 | 104531 | 105418 | 60.87936866 | 115.394589 | 1.89546 |
| Tripeptide aminopeptidase (EC 3.4.11.4)                                              | 173 | 105418 | 106680 | 150.5546751 | 156.312203 | 1.03824 |
| hypothetical protein                                                                 |     | 106760 | 106957 | 0           | 0          | #DIV/0! |
| Taurine transport ATP-binding protein tauB                                           | 171 | 106946 | 107845 | 2.224694105 | 0          | 0       |
| ABC-type nitrate/sulfonate/bicarbonate transport system, permease component          | 170 | 107847 | 108683 | 1.196172249 | 0          | 0       |
| ABC-type nitrate/sulfonate/bicarbonate transport systems, periplasmic components     | 169 | 108749 | 109810 | 5.655042413 | 1.75400566 | 0.31017 |
| hypothetical protein                                                                 | 168 | 109825 | 111102 | 7.830853563 | 1.45732185 | 0.1861  |
| hypothetical protein                                                                 | 167 | 111117 | 111602 | 10.30927835 | 9.59278351 | 0.9305  |
| transcriptional regulator, PemK family                                               | 166 | 111712 | 112056 | 14.53488372 | 2.70494186 | 0.1861  |

|                                                                                                               |     |        |        |             |            |         |
|---------------------------------------------------------------------------------------------------------------|-----|--------|--------|-------------|------------|---------|
| Endopeptidase essential in most Bacteria (E. coli YgjD/B. subtilis YdiE)                                      | 165 | 112092 | 113150 | 157.8449905 | 156.549149 | 0.99179 |
| Putative periplasmic protein                                                                                  | 164 | 113131 | 114240 | 313.7962128 | 216.473399 | 0.68985 |
| RNA polymerase sigma factor RpoS                                                                              | 163 | 114534 | 115388 | 296.2529274 | 318.156909 | 1.07394 |
| Type 4 fimbriae expression regulatory protein pilR                                                            | 162 | 115568 | 116983 | 10.60070671 | 11.1791519 | 1.05457 |
| Sensor protein of zinc sigma-54-dependent two-component system                                                | 161 | 116980 | 118329 | 20.0148258  | 18.6237954 | 0.9305  |
| hypothetical protein                                                                                          | 160 | 118328 | 118543 | 18.60465116 | 8.65581395 | 0.46525 |
| hypothetical protein                                                                                          | 159 | 118677 | 119177 | 32          | 37.22      | 1.16313 |
| Transcriptional regulator, Hth-3 family                                                                       | 158 | 119308 | 119856 | 111.3138686 | 113.765511 | 1.02202 |
| Acetyl-coenzyme A synthetase (EC 6.2.1.1)                                                                     | 157 | 119858 | 121570 | 223.1308411 | 220.124124 | 0.98652 |
| PHP, C-terminal                                                                                               | 156 | 121577 | 122371 | 182.6196474 | 151.176952 | 0.82782 |
| Pyrroline-5-carboxylate reductase (EC 1.5.1.2)                                                                | 155 | 122394 | 123269 | 262.8571429 | 264.793714 | 1.00737 |
| Probable AAA family ATPase                                                                                    | 154 | 123347 | 125155 | 114.4911504 | 116.3125   | 1.01591 |
| hypothetical protein                                                                                          |     | 125179 | 125328 | 0           | 6.24496644 | #DIV/0! |
| hypothetical protein                                                                                          |     | 125777 | 125959 | 10.98901099 | 0          | 0       |
| hypothetical protein                                                                                          | 151 | 126054 | 126215 | 6.211180124 | 0          | 0       |
| hypothetical protein                                                                                          | 150 | 126277 | 126486 | 143.5406699 | 102.399522 | 0.71338 |
| Glutamate 5-kinase (EC 2.7.2.11)                                                                              | 149 | 126513 | 127304 | 187.5792142 | 273.607098 | 1.45862 |
| Gamma-glutamyl phosphate reductase (EC 1.2.1.41)                                                              | 148 | 127322 | 128581 | 179.5075457 | 276.415409 | 1.53985 |
| hypothetical protein                                                                                          | 147 | 128593 | 128802 | 28.70813397 | 22.2607656 | 0.77542 |
| Acetyltransferase                                                                                             | 146 | 128822 | 129499 | 51.69867061 | 17.8677991 | 0.34561 |
| Ribonuclease D (EC 3.1.26.3)                                                                                  | 145 | 129514 | 130362 | 12.97169811 | 8.77830189 | 0.67673 |
| ENDO-TYPE 6-AMINOHEXANOATE OLIGOMER HYDROLASE                                                                 | 144 | 130355 | 131380 | 52.68292683 | 63.5463415 | 1.2062  |
| Phosphopantothenoylcysteine decarboxylase (EC 4.1.1.36) / Phosphopantothenoylcysteine synthetase (EC 6.3.2.5) | 143 | 131377 | 131928 | 90.74410163 | 116.523593 | 1.28409 |
| Phosphopantothenoylcysteine synthetase (EC 6.3.2.5)                                                           | 142 | 131925 | 132731 | 111.662531  | 129.300248 | 1.15796 |
| Polysaccharide deacetylase                                                                                    | 141 | 132794 | 133870 | 19.51672862 | 13.8364312 | 0.70895 |
| Histone acetyltransferase HPA2 and related acetyltransferases                                                 | 140 | 134066 | 134575 | 33.39882122 | 32.9056974 | 0.98524 |
| lipoprotein, putative                                                                                         | 139 | 134585 | 135640 | 103.3175355 | 156.994313 | 1.51953 |
| hypothetical protein                                                                                          | 138 | 135735 | 136463 | 64.56043956 | 65.1861264 | 1.00969 |
| hypothetical protein                                                                                          |     | 136805 | 136951 | 143.8356164 | 178.452055 | 1.24067 |
| Threonyl-tRNA synthetase (EC 6.1.1.3)                                                                         | 136 | 136970 | 138787 | 168.4094662 | 162.338195 | 0.96395 |
| Nitroreductase                                                                                                | 135 | 138802 | 139335 | 356.4727955 | 469.614447 | 1.31739 |
| Xylitol dehydrogenase (EC 1.1.1.9)                                                                            | 134 | 139422 | 140456 | 102.5145068 | 72.8921663 | 0.71104 |
| Oxidoreductase, short chain dehydrogenase/reductase family                                                    | 133 | 140469 | 141236 | 181.2255541 | 180.76206  | 0.99744 |
| Transcriptional regulator, DeoR family                                                                        | 132 | 141259 | 142056 | 77.79171895 | 133.095358 | 1.71092 |
| Transcriptional regulator, DeoR family                                                                        | 131 | 142246 | 143037 | 2.528445006 | 7.05815424 | 2.7915  |
| Trypsin domain/PDZ domain protein                                                                             | 130 | 143288 | 144526 | 273.8287561 | 233.752423 | 0.85364 |
| Cobalt-zinc-cadmium resistance protein                                                                        | 129 | 144529 | 145500 | 67.97116375 | 69.9552008 | 1.02919 |
| hypothetical protein                                                                                          | 128 | 145544 | 145657 | 0           | 0          | #DIV/0! |
| hypothetical protein                                                                                          | 126 | 145656 | 147533 | 46.88332445 | 43.1291955 | 0.91993 |
| hypothetical protein                                                                                          |     | 147530 | 147646 | 0           | 0          | #DIV/0! |
| Single-stranded DNA-binding protein                                                                           | 125 | 147662 | 148132 | 44.68085106 | 45.5351064 | 1.01912 |
| hypothetical protein                                                                                          | 124 | 148515 | 148664 | 6.711409396 | 0          | 0       |



|                                                                                                                            |     |        |        |             |            |         |
|----------------------------------------------------------------------------------------------------------------------------|-----|--------|--------|-------------|------------|---------|
| Peptidase, U32 family                                                                                                      | 123 | 148846 | 151005 | 93.09865679 | 81.4564613 | 0.87495 |
| Von Willebrand factor type A domain protein                                                                                | 122 | 151136 | 153097 | 223.8653748 | 281.380163 | 1.25692 |
| GldJ                                                                                                                       | 121 | 153099 | 153929 | 373.9445115 | 397.342581 | 1.06257 |
| 5-methyltetrahydrofolate--homocysteine methyltransferase (EC 2.1.1.13)                                                     | 120 | 154043 | 157774 | 124.8994908 | 129.686411 | 1.03833 |
| Na <sup>+</sup> driven multidrug efflux pump                                                                               | 119 | 157791 | 159149 | 55.22827688 | 59.6122975 | 1.07938 |
| Sugar ABC transporter, sugar-binding protein                                                                               | 118 | 159162 | 160430 | 71.76656151 | 77.7862776 | 1.08388 |
| Shikimate kinase (EC 2.7.1.71)                                                                                             | 117 | 160608 | 161240 | 64.87341772 | 60.3647152 | 0.9305  |
| Protease prsW (EC 3.4.-.-) (Protease responsible for activating sigma-W)                                                   | 116 | 161270 | 161932 | 54.38066465 | 42.1676737 | 0.77542 |
| Mli3043 protein                                                                                                            | 114 | 162124 | 163485 | 20.57310801 | 16.4085231 | 0.79757 |
| hypothetical protein                                                                                                       | 113 | 163717 | 164178 | 71.5835141  | 88.8112798 | 1.24067 |
| hypothetical protein                                                                                                       | 112 | 164175 | 165371 | 37.62541806 | 26.4523411 | 0.70304 |
| Uncharacterized protein conserved in bacteria                                                                              | 111 | 165389 | 166105 | 79.60893855 | 72.7765363 | 0.91418 |
| hypothetical protein                                                                                                       | 110 | 166107 | 166760 | 101.0719755 | 96.8973966 | 0.9587  |
| Chromosome partition protein smc                                                                                           | 109 | 166771 | 169764 | 163.7153358 | 182.493652 | 1.1147  |
| Maltose/maltodextrin transport ATP-binding protein MalK (EC 3.6.3.19); Multiple sugar ABC transporter, ATP-binding protein | 108 | 170093 | 171211 | 982.1109123 | 853.929338 | 0.86948 |
| hypothetical protein                                                                                                       | 107 | 171687 | 171941 | 456.6929134 | 278.417323 | 0.60964 |
| CDP-diacylglycerol--glycerol-3-phosphate 3-phosphatidyltransferase (EC 2.7.8.5)                                            | 106 | 172070 | 172660 | 188.1355932 | 176.637288 | 0.93888 |
| hypothetical protein                                                                                                       | 105 | 172702 | 172893 | 130.8900524 | 170.510471 | 1.3027  |
| hypothetical protein                                                                                                       | 104 | 172896 | 173030 | 238.8059701 | 333.313433 | 1.39575 |
| hypothetical protein                                                                                                       | 103 | 173083 | 173208 | 0           | 0          | #DIV/0! |
| hypothetical protein                                                                                                       | 102 | 173378 | 173512 | 1925.373134 | 3458.12687 | 1.79608 |
| RTX toxin, putative                                                                                                        | 101 | 173472 | 176051 | 3235.362544 | 3273.88794 | 1.01191 |
| Transposase IS66                                                                                                           | 100 | 176257 | 176649 | 10.20408163 | 9.49489796 | 0.9305  |
| hypothetical protein                                                                                                       | 99  | 176719 | 177555 | 180.6220096 | 253.772727 | 1.40499 |
| putative transposase                                                                                                       | 98  | 177762 | 178364 | 14.95016611 | 12.3654485 | 0.82711 |
| hypothetical protein                                                                                                       |     | 178400 | 178660 | 253.8461538 | 182.521154 | 0.71902 |
| hypothetical protein                                                                                                       |     | 178749 | 178934 | 91.89189189 | 45.2675676 | 0.49262 |
| unique zas2 16S rRNA 2                                                                                                     |     | 179568 | 179578 | 794500      | 708017.45  | 0.89115 |
| unique zas2 16S rRNA 1                                                                                                     |     | 179986 | 179996 | 1726300     | 2322155.8  | 1.34516 |
| unique zas2 23S rRNA 1                                                                                                     |     | 181329 | 181339 | 256100      | 225739.3   | 0.88145 |
| hypothetical protein                                                                                                       |     | 184218 | 184370 | 0           | 0          | #DIV/0! |
| hypothetical protein                                                                                                       | 90  | 184673 | 184849 | 22.72727273 | 5.28693182 | 0.23263 |
| hypothetical protein                                                                                                       | 89  | 185040 | 185921 | 19.29625426 | 12.6742338 | 0.65682 |
| Glycerophosphoryl diester phosphodiesterase (EC 3.1.4.46)                                                                  | 88  | 185930 | 186817 | 13.52874859 | 16.7846674 | 1.24067 |
| Putative ABC transporter of substrate X, permease subunit II                                                               | 87  | 186842 | 187702 | 10.46511628 | 3.24593023 | 0.31017 |
| Putative ABC transporter of substrate X, permease subunit I                                                                | 86  | 187714 | 188568 | 4.683840749 | 5.44789227 | 1.16313 |
| Putative ABC transporter of substrate X, ATP-binding subunit                                                               | 85  | 188568 | 189635 | 14.05810684 | 6.97656982 | 0.49627 |
| Possible ABC transporter, periplasmic substrate X binding protein precursor                                                | 84  | 189691 | 190860 | 24.8075278  | 41.3909324 | 1.66848 |
| hypothetical protein                                                                                                       |     | 190901 | 191029 | 31.25       | 7.26953125 | 0.23263 |
| hypothetical protein                                                                                                       |     | 191008 | 191130 | 0           | 0          | #DIV/0! |
| Novel Xylose regulator from LacI family                                                                                    | 81  | 191145 | 192176 | 4.849660524 | 3.61008729 | 0.7444  |
| Iron-sulfur cluster-binding protein                                                                                        | 79  | 192242 | 193405 | 37.83319003 | 28.8030954 | 0.76132 |



|                                                                                 |    |        |        |             |            |         |
|---------------------------------------------------------------------------------|----|--------|--------|-------------|------------|---------|
| Glycoprotein gp2                                                                | 80 | 193356 | 195098 | 63.14580941 | 72.1110792 | 1.14198 |
| sensory box histidine kinase/response regulator                                 | 78 | 195135 | 198515 | 63.90532544 | 75.7063609 | 1.18466 |
| hypothetical protein                                                            | 77 | 198628 | 199386 | 72.55936675 | 106.798813 | 1.47188 |
| hypothetical protein                                                            | 76 | 199361 | 199507 | 0           | 6.37328767 | #DIV/0! |
| Flagellar hook-length control protein fliK                                      | 75 | 199550 | 203389 | 56.26465225 | 62.2918729 | 1.10712 |
| conserved hypothetical integral membrane protein                                | 73 | 203711 | 204361 | 718.4615385 | 632.74     | 0.88069 |
| UDP-N-acetylglucosamine 1-carboxyvinyltransferase (EC 2.5.1.7)                  | 72 | 204420 | 205700 | 131.25      | 108.316016 | 0.82526 |
| Neutral metalloprotease precursor (EC 3.4.24.-)                                 | 71 | 205707 | 207101 | 55.95408895 | 38.715208  | 0.69191 |
| hypothetical protein                                                            |    | 207055 | 207216 | 12.42236025 | 40.4565217 | 3.25675 |
| hypothetical protein                                                            | 70 | 207176 | 208996 | 53.84615385 | 62.8854396 | 1.16787 |
| hypothetical protein                                                            | 68 | 208993 | 209985 | 62.5        | 49.7142137 | 0.79543 |
| hypothetical protein                                                            |    | 210015 | 210176 | 12.42236025 | 5.77950311 | 0.46525 |
| Phage shock protein A                                                           | 66 | 210340 | 211038 | 290.8309456 | 347.937679 | 1.19636 |
| hypothetical protein                                                            | 65 | 211072 | 211449 | 352.7851459 | 426.993369 | 1.21035 |
| anti-sigma F factor antagonist (spolIIA-2); anti sigma b factor antagonist RsbV | 64 | 211484 | 212053 | 413.0052724 | 412.101933 | 0.99781 |
| tRNA:Cm32/Um32 methyltransferase                                                | 62 | 212279 | 213085 | 45.9057072  | 62.3411911 | 1.35803 |
| N-acetylmannosaminyltransferase (EC 2.4.1.187)                                  | 63 | 213066 | 213884 | 94.13202934 | 72.801956  | 0.7734  |
| Small ribosomal subunit 16S rRNA                                                |    |        |        |             |            |         |
| methyltransferase ## U1498-specific in E.coli                                   | 61 | 213857 | 214738 | 107.8320091 | 109.84336  | 1.01865 |
| Carboxyl-terminal protease (EC 3.4.21.102)                                      | 60 | 214743 | 216260 | 279.4990112 | 331.226104 | 1.18507 |
| hypothetical protein                                                            | 59 | 216359 | 216958 | 11.68614357 | 17.0876461 | 1.46221 |
| Diadenosine tetraphosphatase                                                    | 58 | 217015 | 217833 | 31.78484108 | 38.6760391 | 1.21681 |
| Chloramphenicol acetyltransferase (EC 2.3.1.28)                                 | 57 | 217865 | 218536 | 11.92250373 | 8.32041729 | 0.69788 |
| Conserved domain protein                                                        |    | 218541 | 220751 | 196.3800905 | 259.782127 | 1.32285 |
| Uncharacterized protein MJ1020                                                  | 55 | 220759 | 221529 | 458.4415584 | 640.474026 | 1.39707 |
| Expressed protein                                                               | 54 | 221645 | 222757 | 32.37410072 | 51.0436151 | 1.57668 |
| hypothetical protein                                                            |    | 222833 | 223498 | 64.66165414 | 48.9736842 | 0.75738 |
| Methyl-accepting chemotaxis protein                                             | 52 | 223548 | 225371 | 191.4426769 | 209.273176 | 1.09314 |
| T. pallidum predicted coding region TP0592                                      | 51 | 225501 | 226424 | 132.1776815 | 164.324485 | 1.24321 |
| DNA-binding protein                                                             | 50 | 226519 | 226872 | 186.9688385 | 234.601983 | 1.25477 |
| Cell division protein ftsH (EC 3.4.24.-)                                        | 49 | 226881 | 228842 | 66.63249616 | 108.264223 | 1.6248  |
| hypothetical protein                                                            | 48 | 228903 | 229043 | 0           | 0          | #DIV/0! |
| type 4 fimbrial biogenesis protein PilY1                                        | 47 | 229042 | 231918 | 33.03198887 | 33.3245828 | 1.00886 |
| putative autotransporter protein                                                | 46 | 231989 | 234967 | 51.71255876 | 34.9952989 | 0.67673 |
| Outer membrane autotransporter barrel                                           | 45 | 234969 | 238925 | 73.30637007 | 55.2748989 | 0.75403 |
| hypothetical protein                                                            | 44 | 238938 | 239774 | 41.86602871 | 27.8259569 | 0.66464 |
| Cell surface protein                                                            | 43 | 239774 | 241756 | 16.64984864 | 19.7179617 | 1.18427 |
| Calcium-binding acidic-repeat protein precursor                                 | 42 | 241759 | 243375 | 21.03960396 | 19.001547  | 0.90313 |
| VgrG protein                                                                    | 41 | 243511 | 244494 | 174.9745677 | 209.196846 | 1.19558 |
| Galactokinase (EC 2.7.1.6)                                                      | 40 | 244555 | 245904 | 115.6412157 | 117.260934 | 1.01401 |
| DNA polymerase IV (EC 2.7.7.7)                                                  | 39 | 245958 | 247148 | 44.53781513 | 46.9159664 | 1.0534  |
| hypothetical protein                                                            | 38 | 247266 | 248966 | 447.6470588 | 357.421471 | 0.79844 |
| hypothetical protein                                                            | 37 | 248979 | 250403 | 405.8988764 | 357.432233 | 0.88059 |

|                                                                                |      |        |        |             |            |         |
|--------------------------------------------------------------------------------|------|--------|--------|-------------|------------|---------|
| Methylthioribose-1-phosphate isomerase (EC 5.3.1.23)                           | 35   | 250805 | 251935 | 168.1415929 | 242.09469  | 1.43983 |
| Conserved domain protein                                                       | 34   | 251928 | 252545 | 58.34683955 | 76.9132901 | 1.31821 |
| 5'-methylthioadenosine phosphorylase (EC 2.4.2.28)                             | 33   | 252588 | 253334 | 144.772118  | 135.957775 | 0.93912 |
| hypothetical protein                                                           | 32   | 253546 | 253743 | 101.5228426 | 89.7436548 | 0.88398 |
| hypothetical protein                                                           | 31   | 253910 | 254401 | 22.40325866 | 36.0071283 | 1.60723 |
| hypothetical protein                                                           | 30   | 254525 | 255451 | 7.559395248 | 7.03401728 | 0.9305  |
| hypothetical protein                                                           |      | 255438 | 255599 | 0           | 0          | #DIV/0! |
| hypothetical protein                                                           |      | 255731 | 255898 | 0           | 0          | #DIV/0! |
| hypothetical protein                                                           |      | 256006 | 256146 | 0           | 0          | #DIV/0! |
| hypothetical protein                                                           |      | 256307 | 256543 | 8.474576271 | 11.8283898 | 1.39575 |
| hypothetical protein                                                           | 25   | 256579 | 256734 | 0           | 0          | #DIV/0! |
| hypothetical protein                                                           | 24   | 256792 | 258108 | 2.279635258 | 0          | 0       |
| hypothetical protein                                                           |      | 258205 | 258354 | 0           | 0          | #DIV/0! |
| MII0579 protein                                                                | 22   | 258381 | 259094 | 4.207573633 | 0          | 0       |
| Putative mannosyltransferase involved in polysaccharide biosynthesis           | 21   | 259142 | 259918 | 1.288659794 | 0          | 0       |
| Glycosyltransferase                                                            | 20   | 259942 | 260937 | 1.005025126 | 0          | 0       |
| Conserved membrane protein, possible 4-hydroxybenzoate octaprenyltransferase   | 19   | 260934 | 261893 | 2.085505735 | 0          | 0       |
| Transporter                                                                    | 18   | 261890 | 262258 | 0           | 0          | #DIV/0! |
| putative hydrolase                                                             | 17   | 262264 | 262938 | 1.483679525 | 0          | 0       |
| hypothetical protein                                                           | 16   | 262987 | 263124 | 0           | 0          | #DIV/0! |
| hypothetical protein                                                           | 15   | 263087 | 263563 | 0           | 0          | #DIV/0! |
| hypothetical protein                                                           | 14   | 263560 | 264981 | 5.629838142 | 1.3096411  | 0.23263 |
| DNA for glycosyltransferase, lytic transglycosylase, dTDP-4-rhamnose reductase | 13   | 264981 | 266288 | 0           | 0.71193573 | #DIV/0! |
| capsular polysaccharide biosynthesis protein                                   | 12   | 266358 | 267467 | 4.508566276 | 0.83904418 | 0.1861  |
| Methyltransferase                                                              | 11   | 267581 | 268276 | 2.877697842 | 0          | 0       |
| Glycosyltransferase                                                            | 10   | 268298 | 269365 | 3.748828491 | 0.87207123 | 0.23263 |
| Alpha-L-Rha alpha-1,3-L-rhamnosyltransferase (EC 2.4.1.-)                      | 9    | 269679 | 270644 | 3.10880829  | 0          | 0       |
| UDP-glucose 4-epimerase (EC 5.1.3.2)                                           | 8    | 270687 | 271607 | 9.782608696 | 1.01141304 | 0.10339 |
| Glycosyltransferase                                                            | 7    | 271604 | 272269 | 4.511278195 | 1.39924812 | 0.31017 |
| Putative capsular polysaccharide biosynthesis protein D                        | 6    | 272286 | 273476 | 5.042016807 | 2.34579832 | 0.46525 |
| Tyrosine-protein kinase wzc (EC 2.7.1.112)                                     | 5    | 273488 | 274492 | 6.972111554 | 11.1215139 | 1.59514 |
| Capsular polysaccharide export system periplasmic protein KpsD                 | 4    | 274489 | 275949 | 9.589041096 | 13.3839041 | 1.39575 |
| Probable poly(beta-D-mannuronate) O-acetylase (EC 2.3.1.-)                     | 3    | 275985 | 277424 | 4.169562196 | 3.87977762 | 0.9305  |
| hypothetical protein                                                           | 2    | 277433 | 278572 | 0.877963126 | 0.81694469 | 0.9305  |
| Acyltransferase (EC 2.3.1.-)                                                   | 1    | 278654 | 279783 | 0.885739593 | 1.64836138 | 1.861   |
| hypothetical protein                                                           | 3895 | 279937 | 280194 | 35.01945525 | 25.344358  | 0.72372 |
| hypothetical protein                                                           |      | 280232 | 280345 | 8.849557522 | 0          | 0       |
| hypothetical protein                                                           | 3893 | 280335 | 280466 | 15.26717557 | 0          | 0       |
| Integrase domain protein                                                       | 3892 | 280502 | 281740 | 8.077544426 | 7.51615509 | 0.9305  |
| hypothetical protein                                                           | 3891 | 281354 | 281806 | 6.637168142 | 0          | 0       |
| Integrase domain protein                                                       | 3890 | 281910 | 283160 | 5.6         | 3.722      | 0.66464 |
| Acetyltransferase                                                              | 3889 | 283286 | 284350 | 0           | 0          | #DIV/0! |

|                                                                         |      |        |        |             |            |         |
|-------------------------------------------------------------------------|------|--------|--------|-------------|------------|---------|
| Transposase IS4 family protein                                          |      | 284522 | 285469 | 9.503695882 | 3.93030623 | 0.41356 |
| Transposase IS4 family                                                  |      | 285433 | 286065 | 14.24050633 | 27.9738924 | 1.96439 |
| Transposase                                                             | 3886 | 286261 | 287352 | 1.863932898 | 0          | 0       |
| INTERGENIC                                                              |      | 287353 | 287591 | 5.434782609 | 0          | 0       |
| hypothetical protein                                                    | 3885 | 287603 | 287728 | 0           | 0          | #DIV/0! |
| hypothetical protein                                                    | 3884 | 287708 | 287842 | 0           | 0          | #DIV/0! |
| O-methyltransferase (EC 2.1.1.-)                                        | 3883 | 288040 | 288423 | 0           | 2.42950392 | #DIV/0! |
| Permease of the drug/metabolite transporter (DMT) superfamily           | 3882 | 288893 | 289786 | 11.19820829 | 4.16797312 | 0.3722  |
| Fe-S oxidoreductase                                                     | 3881 | 289857 | 291578 | 36.60662406 | 43.2539221 | 1.18159 |
| hypothetical protein                                                    | 3880 | 291840 | 292043 | 349.7536946 | 132.928571 | 0.38006 |
| hypothetical protein                                                    | 3879 | 292040 | 292213 | 161.849711  | 102.193642 | 0.63141 |
| Voltage-gated chloride channel                                          | 3878 | 292452 | 293852 | 44.28571429 | 43.8664286 | 0.99053 |
| DNA polymerase II (EC 2.7.7.7)                                          | 3877 | 293827 | 296409 | 40.12465914 | 46.0356447 | 1.14732 |
| Cardiolipin synthetase (EC 2.7.8.-)                                     | 3876 | 296534 | 298072 | 65.66970091 | 61.1056567 | 0.9305  |
| GCN5-related N-acetyltransferase, fig 164756.6.peg.1929 homolog         | 3875 | 298128 | 298985 | 25.67094516 | 30.4014002 | 1.18427 |
| Beta-hexosaminidase (EC 3.2.1.52)                                       | 3874 | 298989 | 300680 | 61.50206978 | 51.7250148 | 0.84103 |
| hypothetical protein                                                    | 3873 | 300696 | 300818 | 0           | 15.2540984 | #DIV/0! |
| Transcriptional regulator, DeoR family                                  | 3872 | 300859 | 301884 | 17.56097561 | 23.6029268 | 1.34406 |
| Nucleotidyltransferase domain protein                                   | 3871 | 301963 | 302286 | 160.9907121 | 83.5433437 | 0.51893 |
| hypothetical protein                                                    | 3870 | 302279 | 302677 | 22.61306533 | 28.0552764 | 1.24067 |
| hypothetical protein                                                    |      | 303050 | 303172 | 0           | 0          | #DIV/0! |
| DNA polymerase III alpha subunit (EC 2.7.7.7)                           | 3868 | 303217 | 303810 | 42.15851602 | 70.6112985 | 1.6749  |
| hypothetical protein                                                    | 3867 | 303857 | 304531 | 17.8041543  | 2.7611276  | 0.15508 |
| Flagellar biosynthesis protein flhA                                     | 3866 | 304723 | 306756 | 0.983767831 | 0.91539597 | 0.9305  |
| hypothetical protein                                                    | 3865 | 306802 | 307545 | 0           | 0          | #DIV/0! |
| hypothetical protein                                                    | 3864 | 307631 | 308413 | 20.46035806 | 10.7090793 | 0.52341 |
| TPR repeat                                                              | 3863 | 308572 | 309924 | 4.437869822 | 2.06471893 | 0.46525 |
| TPR repeat                                                              |      | 309934 | 310896 | 3.118503119 | 4.83627859 | 1.55083 |
| TPR domain protein, putative component of TonB system                   | 3861 | 311107 | 312696 | 4.405286344 | 5.8558842  | 1.32929 |
| hypothetical protein                                                    | 3860 | 312812 | 313357 | 3.669724771 | 3.4146789  | 0.9305  |
| TPR repeat                                                              | 3859 | 313490 | 314581 | 7.332722273 | 3.41154904 | 0.46525 |
| Thioredoxin reductase (EC 1.8.1.9)                                      | 3858 | 314625 | 315551 | 96.11231102 | 127.617171 | 1.32779 |
| hypothetical protein                                                    | 3857 | 315642 | 317126 | 51.21293801 | 66.4642857 | 1.2978  |
| hypothetical protein                                                    | 3856 | 317376 | 318287 | 9.879253568 | 7.14983535 | 0.72372 |
| hypothetical protein                                                    | 3855 | 318432 | 318941 | 7.858546169 | 7.31237721 | 0.9305  |
| Cell surface protein                                                    | 3854 | 319024 | 321189 | 36.02771363 | 38.6812933 | 1.07365 |
| Transcriptional regulator, MerR family                                  | 3853 | 321299 | 321640 | 8.797653959 | 51.8460411 | 5.89317 |
| hypothetical protein                                                    | 3852 | 321649 | 321822 | 202.3121387 | 166.736994 | 0.82416 |
| hypothetical protein                                                    | 3851 | 321819 | 322010 | 146.5968586 | 92.5628272 | 0.63141 |
| hypothetical protein                                                    |      | 322043 | 322156 | 8.849557522 | 0          | 0       |
| Thymidylate synthase thyX (EC 2.1.1.-)                                  | 3849 | 322141 | 322983 | 489.3111639 | 353.634204 | 0.72272 |
| Conserved domain protein                                                | 3848 | 323005 | 323916 | 342.4807903 | 337.063666 | 0.98418 |
| N-acetylhexosamine 1-kinase                                             | 3846 | 323916 | 325046 | 135.3982301 | 133.399115 | 0.98524 |
| hypothetical protein                                                    | 3847 | 325023 | 325166 | 104.8951049 | 13.013986  | 0.12407 |
| Multiple sugar ABC transporter, substrate-binding protein               | 3845 | 325129 | 326397 | 679.8107256 | 886.470032 | 1.304   |
| Multiple sugar ABC transporter, membrane-spanning permease protein MsmF | 3844 | 326470 | 327381 | 118.5510428 | 93.9692645 | 0.79265 |

|                                                                                                            |      |        |        |             |            |         |
|------------------------------------------------------------------------------------------------------------|------|--------|--------|-------------|------------|---------|
| Multiple sugar ABC transporter, membrane-spanning permease protein MsmG                                    | 3843 | 327391 | 328242 | 57.57931845 | 51.3907168 | 0.89252 |
| Uncharacterized protein YphG, TPR-domain containing                                                        | 3842 | 328245 | 330521 | 78.20738137 | 67.0483304 | 0.85731 |
| Prolipoprotein diacylglyceryl transferase (EC 2.4.99.-)                                                    | 3841 | 330595 | 331656 | 131.0084826 | 164.876532 | 1.25852 |
| Aminomethyltransferase (glycine cleavage system T protein) (EC 2.1.2.10)                                   | 3840 | 332132 | 333217 | 50.69124424 | 90.9059908 | 1.79333 |
| Glycine cleavage system H protein                                                                          | 3839 | 333242 | 333613 | 123.9892183 | 168.041779 | 1.35529 |
| Glycine dehydrogenase [decarboxylating] (glycine cleavage system P1 protein) (EC 1.4.4.2)                  | 3838 | 333624 | 334973 | 67.45737583 | 96.567828  | 1.43154 |
| Glycine dehydrogenase [decarboxylating] (glycine cleavage system P2 protein) (EC 1.4.4.2)                  | 3837 | 334970 | 336403 | 86.53175157 | 94.80321   | 1.09559 |
| Lipoate-protein ligase A                                                                                   | 3836 | 336414 | 337442 | 41.82879377 | 57.0248054 | 1.36329 |
| Dihydrolipoamide dehydrogenase (EC 1.8.1.4)                                                                | 3835 | 337465 | 338970 | 63.12292359 | 80.3754153 | 1.27332 |
| hypothetical protein                                                                                       | 3834 | 339034 | 339756 | 94.18282548 | 87.6371191 | 0.9305  |
| hypothetical protein                                                                                       | 3833 | 339771 | 340451 | 91.17647059 | 106.733824 | 1.17063 |
| Catalyzes the cleavage of p-aminobenzoyl-glutamate to p-aminobenzoate and glutamate, subunit B             | 3832 | 340448 | 341800 | 64.34911243 | 119.065459 | 1.8503  |
| hypothetical protein                                                                                       |      | 341829 | 342008 | 0           | 0          | #DIV/0! |
| Iron-sulfur cluster-binding protein                                                                        | 3830 | 341995 | 342807 | 0           | 0          | #DIV/0! |
| Flagellar synthesis regulator fleN                                                                         | 3829 | 342943 | 344082 | 135.2063213 | 230.378402 | 1.7039  |
| hypothetical protein                                                                                       | 3828 | 344073 | 344624 | 226.8602541 | 197.583485 | 0.87095 |
| hypothetical protein                                                                                       | 3827 | 344739 | 344897 | 12.65822785 | 17.6677215 | 1.39575 |
| hypothetical protein                                                                                       |      | 345083 | 345220 | 284.6715328 | 135.839416 | 0.47718 |
| hypothetical protein                                                                                       | 3825 | 345201 | 345380 | 156.424581  | 119.561453 | 0.76434 |
| hypothetical protein                                                                                       | 3824 | 345616 | 346023 | 31.94103194 | 34.2936118 | 1.07365 |
| hypothetical protein                                                                                       |      | 346013 | 346261 | 342.7419355 | 356.441532 | 1.03997 |
| hypothetical protein                                                                                       |      | 346371 | 346757 | 103.626943  | 173.564767 | 1.6749  |
| DNA polymerase III alpha subunit (EC 2.7.7.7)                                                              | 3821 | 346906 | 350898 | 104.5226131 | 112.221106 | 1.07365 |
| conserved hypothetical membrane protein                                                                    | 3820 | 350909 | 351496 | 66.439523   | 98.2810903 | 1.47926 |
| ATP-dependent DNA helicase RecG (EC 3.6.1.-)                                                               | 3819 | 351521 | 353806 | 54.70459519 | 59.454267  | 1.08682 |
| RNA polymerase sigma factor RpoD                                                                           | 3818 | 354130 | 355032 | 29.93348115 | 93.8752772 | 3.13613 |
| CbbY family protein                                                                                        | 3817 | 355050 | 355742 | 85.26011561 | 91.4364162 | 1.07244 |
| hypothetical membrane protein                                                                              | 3816 | 356003 | 357115 | 374.1007194 | 583.236061 | 1.55903 |
| transcriptional regulator, Crp/Fnr family                                                                  | 3815 | 357308 | 357964 | 64.02439024 | 85.1067073 | 1.32929 |
| transcriptional regulator, Crp/Fnr family                                                                  | 3814 | 357966 | 358967 | 215.7842158 | 214.730769 | 0.99512 |
| COG0613, Predicted metal-dependent phosphoesterases (PHP family)                                           | 3813 | 359114 | 360001 | 140.9244645 | 113.296505 | 0.80395 |
| hypothetical protein                                                                                       | 3812 | 360039 | 360458 | 582.3389021 | 661.787589 | 1.13643 |
| conserved hypothetical protein-putative a phosphoesterase or an exonuclease, fig 138119.3.peg.2719 homolog | 3811 | 360530 | 361507 | 131.013306  | 169.528147 | 1.29398 |
| hypothetical protein                                                                                       | 3810 | 361585 | 362448 | 1.158748552 | 4.31286211 | 3.722   |
| Protein involved in catabolism of external DNA                                                             | 3809 | 362540 | 363424 | 28.28054299 | 35.7884615 | 1.26548 |
| Outer membrane autotransporter barrel domain precursor                                                     | 3808 | 363707 | 366472 | 1010.126582 | 977.950452 | 0.96815 |

|                                                                                                             |      |        |        |             |            |         |
|-------------------------------------------------------------------------------------------------------------|------|--------|--------|-------------|------------|---------|
| COG1272: Predicted membrane protein hemolysin III homolog                                                   | 3807 | 366574 | 367230 | 9.146341463 | 5.67378049 | 0.62033 |
| COG0488: ATPase components of ABC transporters with duplicated ATPase domains                               | 3805 | 367284 | 368981 | 342.1985816 | 353.611998 | 1.03335 |
| hypothetical protein                                                                                        | 3806 | 368978 | 369736 | 207.1240106 | 185.363456 | 0.89494 |
| Redox-sensitive transcriptional regulator (AT-rich DNA-binding protein)                                     | 3804 | 369824 | 370555 | 47.87961696 | 48.370725  | 1.01026 |
| Phosphoserine aminotransferase (EC 2.6.1.52)                                                                | 3803 | 370591 | 371697 | 116.636528  | 137.976492 | 1.18296 |
| D-3-phosphoglycerate dehydrogenase (EC 1.1.1.95)                                                            | 3802 | 371718 | 372893 | 97.87234043 | 101.365106 | 1.03569 |
| hypothetical protein                                                                                        | 3801 | 372958 | 373077 | 42.01680672 | 39.0966387 | 0.9305  |
| Flavodoxin                                                                                                  | 3800 | 373078 | 373506 | 7.009345794 | 21.7406542 | 3.10167 |
| hypothetical protein                                                                                        | 3799 | 373677 | 375989 | 33.30449827 | 50.7106401 | 1.52264 |
| hypothetical protein                                                                                        | 3798 | 376120 | 376851 | 43.77564979 | 47.0978112 | 1.07589 |
| Uncharacterized protein TP_0900                                                                             | 3797 | 376851 | 379853 | 22.98467688 | 24.7968021 | 1.07884 |
| ATP-dependent nuclease, subunit A                                                                           | 3796 | 379846 | 383655 | 14.70202153 | 19.2988973 | 1.31267 |
| Transcription accessory protein (S1 RNA-binding domain)                                                     | 3795 | 383668 | 386190 | 169.7065821 | 196.283109 | 1.1566  |
| Methyltransferase gidB (EC 2.1.-.-)                                                                         | 3794 | 386262 | 386993 | 41.03967168 | 59.8269494 | 1.45778 |
| hypothetical protein                                                                                        | 3793 | 386978 | 388363 | 20.2166065  | 17.46787   | 0.86404 |
| HTH transcriptional regulator TetR family                                                                   | 3792 | 388509 | 389099 | 5.084745763 | 7.88559322 | 1.55083 |
| Metallo-beta-lactamase superfamily hydrolase                                                                | 3791 | 389096 | 389743 | 29.36630603 | 5.75270479 | 0.19589 |
| Phage infection protein                                                                                     | 3790 | 389740 | 390915 | 16.17021277 | 21.3817021 | 1.32229 |
| Multi antimicrobial extrusion protein (Na <sup>(+)</sup> /drug antiporter), MATE family of MDR efflux pumps | 3789 | 390919 | 392307 | 10.1010101  | 6.04220779 | 0.59818 |
| Phosphoribosylaminoimidazole carboxylase catalytic subunit (EC 4.1.1.21)                                    | 3788 | 392401 | 392895 | 216.5991903 | 192.12753  | 0.88702 |
| Phosphoribosylaminoimidazole-succinocarboxamide synthase (EC 6.3.2.6)                                       | 3787 | 392892 | 393611 | 189.1515994 | 218.712796 | 1.15628 |
| Amidophosphoribosyltransferase (EC 2.4.2.14)                                                                | 3786 | 393586 | 395058 | 113.451087  | 180.790082 | 1.59355 |
| Mannose-6-phosphate isomerase (EC 5.3.1.8)                                                                  | 3785 | 395158 | 395508 | 97.14285714 | 124.952857 | 1.28628 |
| Autoinducer 2 (AI-2) kinase LsrK (EC 2.7.1.-)                                                               | 3784 | 395539 | 397161 | 68.43403206 | 68.2672626 | 0.99756 |
| Autoinducer 2 (AI-2) aldolase LsrF (EC 4.2.1.-)                                                             | 3783 | 397323 | 398201 | 222.095672  | 221.497153 | 0.99731 |
| Phosphoribosylformylglycinamide cyclo-ligase (EC 6.3.3.1)                                                   | 3782 | 398243 | 399343 | 199.8175182 | 176.591241 | 0.88376 |
| hypothetical protein                                                                                        | 3781 | 399336 | 399491 | 167.7419355 | 138.074194 | 0.82313 |
| Phosphoribosylglycinamide formyltransferase (EC 2.1.2.2)                                                    | 3780 | 399488 | 400099 | 80.19639935 | 82.2373159 | 1.02545 |
| Fe-S oxidoreductase                                                                                         | 3779 | 400130 | 401299 | 312.2326775 | 264.265184 | 0.84637 |
| IMP cyclohydrolase (EC 3.5.4.10) / Phosphoribosylaminoimidazolecarboxamide formyltransferase (EC 2.1.2.3)   | 3778 | 401317 | 402978 | 251.6556291 | 282.903371 | 1.12417 |
| Biotin synthase (EC 2.8.1.6)                                                                                | 3777 | 403002 | 403979 | 143.2958035 | 137.146366 | 0.95709 |
| hypothetical protein                                                                                        | 3776 | 404093 | 405622 | 111.1837802 | 102.84794  | 0.92503 |
| hypothetical protein                                                                                        |      | 405639 | 405773 | 0           | 0          | #DIV/0! |
| Phosphoribosylamine--glycine ligase (EC 6.3.4.13)                                                           | 3774 | 405772 | 407103 | 58.60255447 | 69.2107438 | 1.18102 |
| N-acetylglutamate synthase (EC 2.3.1.1)                                                                     | 3773 | 407198 | 408550 | 88.01775148 | 86.7181953 | 0.98524 |
| Hemerythrin family protein                                                                                  | 3772 | 408679 | 409149 | 700         | 528.603191 | 0.75515 |
| ATP-dependent protease La (EC 3.4.21.53) Type I                                                             | 3771 | 409606 | 412047 | 160.8247423 | 237.51732  | 1.47687 |



|                                                                                                                                                                                 |      |        |        |             |            |         |
|---------------------------------------------------------------------------------------------------------------------------------------------------------------------------------|------|--------|--------|-------------|------------|---------|
| Uncharacterized protein BB_0097                                                                                                                                                 | 3770 | 412053 | 412454 | 69.82543641 | 113.701995 | 1.62838 |
| Peptidase, M48 family                                                                                                                                                           | 3769 | 412548 | 413408 | 113.9534884 | 130.919186 | 1.14888 |
| TPR domain protein, putative component of TonB system                                                                                                                           | 3768 | 413415 | 414713 | 238.0585516 | 222.947227 | 0.93652 |
| hypothetical protein                                                                                                                                                            | 3767 | 414715 | 415659 | 205.5084746 | 177.425847 | 0.86335 |
| hypothetical protein                                                                                                                                                            |      | 415717 | 415902 | 5.405405405 | 0          | 0       |
| Energy conserving hydrogenase Ehb polyferredoxin (protein K)                                                                                                                    | 3765 | 415901 | 416329 | 761.682243  | 1010.94042 | 1.32725 |
| Histone acetyltransferase HPA2 and related acetyltransferases                                                                                                                   | 3764 | 416512 | 416994 | 20.74688797 | 17.3744813 | 0.83745 |
| Integration host factor beta subunit                                                                                                                                            | 3763 | 417098 | 417595 | 1229.376258 | 1495.91449 | 1.21681 |
| Core component MtsA of methionine-regulated ECF transporter                                                                                                                     | 3762 | 417964 | 418515 | 45.37205082 | 62.4836661 | 1.37714 |
| ATPase component MtsB of energizing module of methionine-regulated ECF transporter                                                                                              | 3761 | 418610 | 420310 | 21.76470588 | 32.8411765 | 1.50892 |
| Transmembrane component MtsC of energizing module of methionine-regulated ECF transporter                                                                                       | 3760 | 420307 | 421137 | 10.84337349 | 15.6951807 | 1.44744 |
| Putative cytoplasmic protein                                                                                                                                                    | 3759 | 421472 | 422986 | 267.5033025 | 395.185931 | 1.47731 |
| radical activating enzyme                                                                                                                                                       | 3758 | 423018 | 423869 | 207.9905993 | 224.150999 | 1.0777  |
| Hypothetical sugar kinase in cluster with indigoidine synthase indA , PfkB family of kinases                                                                                    | 3757 | 423866 | 424819 | 77.64952781 | 92.7570829 | 1.19456 |
| Indigoidine synthase A-like protein, uncharacterized enzyme involved in pigment biosynthesis                                                                                    | 3756 | 424829 | 425752 | 193.9328277 | 258.080173 | 1.33077 |
| alternate gene name: ipa-30d                                                                                                                                                    | 3755 | 425778 | 426275 | 408.4507042 | 602.859155 | 1.47597 |
| hypothetical protein                                                                                                                                                            | 3754 | 426344 | 426493 | 288.590604  | 518.332215 | 1.79608 |
| Cysteine synthase (EC 2.5.1.47)                                                                                                                                                 | 3753 | 426527 | 427447 | 79.34782609 | 80.9130435 | 1.01973 |
| hypothetical protein                                                                                                                                                            |      | 427534 | 427674 | 0           | 0          | #DIV/0! |
| hypothetical protein                                                                                                                                                            | 3751 | 428089 | 428580 | 18.3299389  | 26.5315682 | 1.44744 |
| hypothetical protein                                                                                                                                                            |      | 428685 | 428846 | 6.211180124 | 0          | 0       |
| hypothetical protein                                                                                                                                                            |      | 428952 | 429539 | 6.814310051 | 9.51107325 | 1.39575 |
| hypothetical protein                                                                                                                                                            | 3748 | 429503 | 429712 | 33.49282297 | 17.8086124 | 0.53171 |
| Glycosyl transferase, group 2 family protein                                                                                                                                    | 3747 | 430147 | 430980 | 1.200480192 | 1.11704682 | 0.9305  |
| hypothetical protein                                                                                                                                                            | 3746 | 431010 | 432404 | 0.717360115 | 0          | 0       |
| Poly(glycerol-phosphate) alpha-glucosyltransferase (EC 2.4.1.52)                                                                                                                | 3745 | 432424 | 433467 | 0.958772771 | 0          | 0       |
| Glycosyl transferase, group 2 family protein                                                                                                                                    | 3744 | 433512 | 434348 | 0           | 2.22607656 | #DIV/0! |
| hypothetical protein                                                                                                                                                            |      | 434604 | 434732 | 0           | 0          | #DIV/0! |
| Phospholipid-lipopolysaccharide ABC transporter                                                                                                                                 | 3742 | 434745 | 436454 | 1.755412522 | 0.54447045 | 0.31017 |
| hypothetical protein                                                                                                                                                            | 3741 | 436464 | 437312 | 0           | 0          | #DIV/0! |
| Nucleoside-diphosphate-sugar pyrophosphorylase involved in lipopolysaccharide biosynthesis/translation initiation factor 2B, gamma/epsilon subunits (eIF-2Bgamma/eIF-2Bepsilon) | 3740 | 437315 | 438382 | 0.937207123 | 0          | 0       |
| UDP-glucose 4-epimerase (EC 5.1.3.2)                                                                                                                                            | 3739 | 438397 | 439407 | 0.99009901  | 0.92128713 | 0.9305  |
| hypothetical protein                                                                                                                                                            | 3738 | 439499 | 440356 | 2.333722287 | 0          | 0       |
| hypothetical protein                                                                                                                                                            |      | 440532 | 440726 | 0           | 0          | #DIV/0! |

|                                                    |      |        |        |             |            |         |
|----------------------------------------------------|------|--------|--------|-------------|------------|---------|
| putative protein family member (5Q829)             | 3736 | 440746 | 441336 | 0           | 0          | #DIV/0! |
| Alpha-1,2-fucosyltransferase                       | 3735 | 441373 | 442269 | 0           | 0          | #DIV/0! |
| HlpA protein                                       | 3734 | 442269 | 443189 | 1.086956522 | 0          | 0       |
| Maltose O-acetyltransferase (EC 2.3.1.79)          | 3733 | 443190 | 443801 | 0           | 0          | #DIV/0! |
| Mannosyltransferase (EC 2.4.1.-)                   | 3732 | 443899 | 445071 | 0           | 1.58788396 | #DIV/0! |
| Tyrosine-protein kinase wzc (EC 2.7.1.112)         | 3731 | 445107 | 446114 | 6.951340616 | 5.54419067 | 0.79757 |
| hypothetical protein                               | 3730 | 446178 | 447797 | 6.79431748  | 2.87368746 | 0.42295 |
| hypothetical protein                               | 3729 | 447830 | 448009 | 27.93296089 | 15.5949721 | 0.5583  |
| Nodulation protein noeA                            | 3728 | 448021 | 449400 | 7.976794779 | 20.2429297 | 2.53773 |
| hypothetical protein                               |      | 449427 | 449543 | 0           | 0          | #DIV/0! |
| Capsular polysaccharide export system              |      |        |        |             |            |         |
| periplasmic protein KpsD                           | 3726 | 449540 | 451003 | 14.35406699 | 17.1725906 | 1.19636 |
| Exopolysaccharide production protein exoZ          | 3725 | 451065 | 452120 | 0           | 0.88199052 | #DIV/0! |
| hypothetical protein                               | 3724 | 452701 | 452991 | 24.13793103 | 0          | 0       |
| hypothetical protein                               | 3723 | 452991 | 453428 | 11.4416476  | 2.12929062 | 0.1861  |
| Glutamine ABC transporter, periplasmic             |      |        |        |             |            |         |
| glutamine-binding protein (TC 3.A.1.3.2)           | 3722 | 453578 | 454624 | 186.4244742 | 206.382409 | 1.10706 |
| amino acid ABC transporter, permease protein       | 3721 | 454643 | 455302 | 160.8497724 | 179.322458 | 1.11484 |
| Glutamine transport ATP-binding protein glnQ       |      |        |        |             |            |         |
| (TC 3.A.1.3.2)                                     | 3720 | 455316 | 456092 | 81.18556701 | 85.1359536 | 1.04866 |
| Serine acetyltransferase (EC 2.3.1.30)             | 3719 | 456114 | 457073 | 20.85505735 | 28.1381648 | 1.34923 |
| Cysteine desulfurase (EC 2.8.1.7)                  | 3718 | 457085 | 458962 | 45.81779435 | 54.0354289 | 1.17935 |
| Major membrane protein I                           | 3717 | 458949 | 459893 | 29.66101695 | 47.3135593 | 1.59514 |
| Sulfur carrier protein adenylyltransferase ThiF    | 3716 | 460055 | 461227 | 44.36860068 | 40.491041  | 0.91261 |
| Asr3294 protein                                    | 3715 | 461230 | 461514 | 28.16901408 | 26.2112676 | 0.9305  |
| Mov34/MPN/PAD-1                                    | 3714 | 461538 | 461966 | 60.74766355 | 34.7850467 | 0.57262 |
| Cysteine synthase (EC 2.5.1.47)                    | 3713 | 461963 | 462865 | 24.3902439  | 34.0426829 | 1.39575 |
| Xaa-Pro aminopeptidase (EC 3.4.11.9)               | 3712 | 462994 | 464214 | 78.68852459 | 107.541393 | 1.36667 |
| hypothetical protein                               | 3711 | 464351 | 465718 | 21.94586686 | 9.52962692 | 0.43423 |
| hypothetical protein                               |      | 465706 | 465858 | 0           | 0          | #DIV/0! |
| no significant homology.                           | 3708 | 465814 | 466071 | 206.2256809 | 264.305447 | 1.28163 |
| Iron-sulfur flavoprotein                           | 3709 | 466068 | 466625 | 118.491921  | 197.125673 | 1.66362 |
| hypothetical protein                               | 3707 | 466703 | 467272 | 7.029876977 | 6.54130053 | 0.9305  |
| Transcriptional regulator, TetR family             | 3706 | 467379 | 467957 | 27.6816609  | 17.7084775 | 0.63972 |
| Neopullulanase (EC 3.2.1.135)                      | 3704 | 467970 | 469439 | 2.722940776 | 4.43396869 | 1.62838 |
| hypothetical protein                               |      | 469431 | 469544 | 0           | 8.23451327 | #DIV/0! |
| hypothetical protein                               |      | 469531 | 469746 | 0           | 0          | #DIV/0! |
| hypothetical protein                               | 3702 | 469750 | 470676 | 14.03887689 | 16.0777538 | 1.14523 |
| hypothetical protein                               |      | 470675 | 470989 | 6.369426752 | 0          | 0       |
| hypothetical protein                               |      | 471126 | 471245 | 0           | 0          | #DIV/0! |
| Deoxyribonuclease TatD                             | 3700 | 471235 | 472050 | 30.67484663 | 52.5190184 | 1.71212 |
| hypothetical protein                               | 3698 | 472199 | 473974 | 0.563380282 | 0          | 0       |
| Subtilisin-like serine protease                    |      | 474155 | 474688 | 1.876172608 | 1.74577861 | 0.9305  |
| Cell division protein ftsH (EC 3.4.24.-)           |      | 474690 | 475037 | 5.763688761 | 13.407781  | 2.32625 |
| Cell division protein ftsH (EC 3.4.24.-)           |      | 475047 | 475652 | 14.87603306 | 27.6842975 | 1.861   |
| hypothetical protein                               | 3694 | 475654 | 475788 | 74.62686567 | 83.3283582 | 1.1166  |
| Type I restriction modification DNA specificity    |      |        |        |             |            |         |
| domain, putative                                   | 3693 | 475781 | 477193 | 26.20396601 | 10.5439093 | 0.40238 |
| type I restriction-modification system, M subunit, |      |        |        |             |            |         |
| putative                                           | 3692 | 477190 | 479208 | 44.59861249 | 35.5047076 | 0.79609 |
| putative transcriptional regulator                 | 3691 | 479269 | 479895 | 47.92332268 | 47.5654952 | 0.99253 |
| hypothetical protein                               | 3690 | 479895 | 480053 | 6.329113924 | 17.6677215 | 2.7915  |

|                                                                                            |      |        |        |             |            |         |
|--------------------------------------------------------------------------------------------|------|--------|--------|-------------|------------|---------|
| Transposase, mutator type                                                                  |      | 480115 | 480483 | 119.5652174 | 65.7418478 | 0.54984 |
| hypothetical protein                                                                       |      | 480541 | 480672 | 53.4351145  | 42.6183206 | 0.79757 |
| Transposase for insertion sequence element ISRM5                                           |      | 480676 | 481296 | 53.22580645 | 63.033871  | 1.18427 |
| hypothetical protein                                                                       | 3686 | 481547 | 482122 | 0           | 0          | #DIV/0! |
| hypothetical protein                                                                       | 3685 | 482215 | 482745 | 1.886792453 | 1.75566038 | 0.9305  |
| hypothetical protein                                                                       | 3684 | 482870 | 483079 | 4.784688995 | 0          | 0       |
| hypothetical protein                                                                       |      | 483206 | 483358 | 26.31578947 | 18.3651316 | 0.69788 |
| PIN domain protein                                                                         | 3682 | 483575 | 483973 | 16.33986928 | 9.12254902 | 0.5583  |
| hypothetical protein                                                                       |      | 484029 | 484235 | 47.61904762 | 0          | 0       |
| hypothetical protein                                                                       | 3680 | 484486 | 485352 | 17.32101617 | 13.9682448 | 0.80643 |
| serine/threonine-protein kinase                                                            | 3679 | 485688 | 486023 | 5.970149254 | 2.77761194 | 0.46525 |
| 4-carboxymuconolactone decarboxylase (EC 4.1.1.44)                                         | 3678 | 486086 | 486475 | 7.712082262 | 0          | 0       |
| Transcriptional regulator, MerR family                                                     |      | 486748 | 486936 | 5.319148936 | 0          | 0       |
| Isochorismatase (EC 3.3.2.1)                                                               | 3676 | 486945 | 487496 | 9.074410163 | 3.37749546 | 0.3722  |
| hypothetical protein                                                                       | 3675 | 487699 | 488451 | 0           | 0          | #DIV/0! |
| Putative GTP-binding protien TM0445                                                        | 3674 | 488769 | 489998 | 75.67127746 | 103.725386 | 1.37074 |
| Aspartate ammonia-lyase (EC 4.3.1.1)                                                       | 3673 | 489995 | 491398 | 53.45687812 | 41.1197434 | 0.76921 |
| Magnesium transporter                                                                      | 3672 | 491679 | 493022 | 32.76247208 | 38.7997022 | 1.18427 |
| hypothetical protein                                                                       |      | 493188 | 493313 | 56          | 81.884     | 1.46221 |
| hypothetical protein                                                                       | 3670 | 493346 | 493609 | 285.1711027 | 392.720532 | 1.37714 |
| Thiazole biosynthesis protein ThiH                                                         | 3669 | 493703 | 495142 | 301.5983322 | 397.030577 | 1.31642 |
| Biotin synthase and related enzymes                                                        | 3668 | 495257 | 496297 | 173.0769231 | 220.099038 | 1.27168 |
| Oligopeptide ABC transporter, periplasmic oligopeptide-binding protein oppA (TC 3.A.1.5.1) | 3667 | 496355 | 498007 | 459.4430993 | 563.819915 | 1.22718 |
| hypothetical protein                                                                       | 3666 | 498068 | 498187 | 0           | 0          | #DIV/0! |
| hypothetical protein                                                                       | 3665 | 498675 | 500180 | 9.302325581 | 4.32790698 | 0.46525 |
| Oligopeptide transport ATP-binding protein oppF (TC 3.A.1.5.1)                             | 3664 | 500287 | 501246 | 23.98331595 | 37.8409802 | 1.5778  |
| Oligopeptide transport ATP-binding protein oppD (TC 3.A.1.5.1)                             | 3663 | 501243 | 502355 | 30.57553957 | 60.2482014 | 1.97047 |
| Oligopeptide transport system permease protein oppC (TC 3.A.1.5.1)                         | 3662 | 502365 | 503390 | 14.63414634 | 13.6170732 | 0.9305  |
| Oligopeptide transport system permease protein oppB (TC 3.A.1.5.1)                         | 3661 | 503390 | 504331 | 30.81827843 | 39.5536663 | 1.28345 |
| hypothetical protein                                                                       |      | 504518 | 504655 | 36.49635036 | 47.5437956 | 1.3027  |
| hypothetical protein                                                                       | 3658 | 504668 | 504820 | 0           | 0          | #DIV/0! |
| hypothetical protein                                                                       | 3657 | 505204 | 506205 | 4.995004995 | 1.85914086 | 0.3722  |
| hypothetical protein                                                                       | 3656 | 506312 | 507787 | 25.76271186 | 29.0189831 | 1.12639 |
| Outer membrane protein tpn50 precursor (Antigen tpp57)                                     |      | 508029 | 509249 | 68.85245902 | 73.2196721 | 1.06343 |
| Ribose-phosphate pyrophosphokinase (EC 2.7.6.1)                                            | 3654 | 509277 | 510509 | 154.2207792 | 118.578328 | 0.76889 |
| Xylulose kinase (EC 2.7.1.17)                                                              | 3653 | 510514 | 511989 | 78.6440678  | 87.6877966 | 1.115   |
| Phosphoglycolate phosphatase (EC 3.1.3.18)                                                 | 3652 | 511976 | 512653 | 73.85524372 | 50.8545052 | 0.68857 |
| Transcription regulator [contains diacylglycerol kinase catalytic domain]                  | 3651 | 512685 | 513809 | 100.5338078 | 125.83274  | 1.25165 |
| hypothetical protein                                                                       |      | 513855 | 514091 | 4.237288136 | 7.88559322 | 1.861   |
| hypothetical protein                                                                       | 3649 | 514091 | 514582 | 2.036659878 | 1.89511202 | 0.9305  |
| FOG: TPR repeat                                                                            | 3648 | 514703 | 516055 | 1.479289941 | 2.06471893 | 1.39575 |



|                                                                                                                                      |      |        |        |             |            |         |
|--------------------------------------------------------------------------------------------------------------------------------------|------|--------|--------|-------------|------------|---------|
| hypothetical protein                                                                                                                 | 3647 | 516099 | 516812 | 0           | 0          | #DIV/0! |
| hypothetical protein                                                                                                                 | 3646 | 516799 | 517347 | 0           | 0          | #DIV/0! |
| hypothetical protein                                                                                                                 | 3645 | 517388 | 517780 | 0           | 0          | #DIV/0! |
| hypothetical protein                                                                                                                 | 3644 | 517853 | 518134 | 3.558718861 | 3.3113879  | 0.9305  |
| Transcriptional regulator, Cro/C1 family                                                                                             | 3643 | 518282 | 518674 | 20.40816327 | 7.12117347 | 0.34894 |
| Uncharacterized protein TP_0851                                                                                                      | 3642 | 518751 | 520967 | 50.09025271 | 83.140343  | 1.65981 |
| Multi antimicrobial extrusion protein (Na <sup>+</sup> )/drug antiporter), MATE family of MDR efflux pumps putative membrane protein | 3641 | 520964 | 522340 | 39.35860058 | 40.6924198 | 1.03389 |
| Aspartyl-tRNA synthetase (EC 6.1.1.12); Aspartyl-tRNA(Asn) synthetase                                                                | 3640 | 522474 | 523463 | 44.48938322 | 66.8003033 | 1.50149 |
| Aspartyl-tRNA(Asn) amidotransferase subunit B (EC 6.3.5.-); Glutamyl-tRNA(Gln) amidotransferase subunit B (EC 6.3.5.-)               | 3639 | 523552 | 524862 | 117.5572519 | 137.799237 | 1.17219 |
| Aspartyl-tRNA(Asn) amidotransferase subunit A (EC 6.3.5.-); Glutamyl-tRNA(Gln) amidotransferase subunit A (EC 6.3.5.-)               | 3638 | 524970 | 526481 | 124.4209133 | 216.151886 | 1.73726 |
| hypothetical protein                                                                                                                 | 3637 | 526484 | 528001 | 88.33223467 | 128.810152 | 1.45825 |
| ATP-dependent DNA helicase RecG-related protein                                                                                      | 3636 | 528051 | 528431 | 102.6315789 | 156.715789 | 1.52697 |
| hypothetical protein                                                                                                                 | 3635 | 528791 | 530404 | 13.63918165 | 9.2300062  | 0.67673 |
| hypothetical protein                                                                                                                 | 3634 | 530430 | 530678 | 12.09677419 | 26.2641129 | 2.17117 |
| putative ORF-2                                                                                                                       | 3633 | 530690 | 530941 | 7.96812749  | 3.70717131 | 0.46525 |
| hypothetical protein                                                                                                                 | 3632 | 531029 | 531781 | 1.329787234 | 4.94946809 | 3.722   |
| hypothetical protein                                                                                                                 | 3631 | 531804 | 531962 | 0           | 0          | #DIV/0! |
| Type I restriction-modification system, specificity subunit S (EC 3.1.21.3)                                                          | 3630 | 531969 | 534398 | 46.9328942  | 38.3079457 | 0.81623 |
| Type I restriction-modification system, restriction subunit R (EC 3.1.21.3)                                                          | 3629 | 534411 | 536969 | 50.03909304 | 52.0177873 | 1.03954 |
| hypothetical protein                                                                                                                 | 3628 | 536985 | 537122 | 0           | 0          | #DIV/0! |
| hypothetical protein                                                                                                                 |      | 537570 | 537692 | 15.87301587 | 59.0793651 | 3.722   |
| DNA polymerase III alpha subunit (EC 2.7.7.7)                                                                                        | 3623 | 538143 | 539135 | 3.024193548 | 0          | 0       |
| transposase, mutator family                                                                                                          | 3621 | 539337 | 539549 | 10.47120419 | 9.7434555  | 0.9305  |
| hypothetical protein                                                                                                                 | 3622 | 539522 | 539641 | 37.97468354 | 23.556962  | 0.62033 |
| 4-carboxymuconolactone decarboxylase (EC 4.1.1.44)                                                                                   | 3620 | 539625 | 539942 | 192.4290221 | 416.817035 | 2.16608 |
| hypothetical protein                                                                                                                 | 3619 | 539986 | 540360 | 184.4919786 | 99.5187166 | 0.53942 |
| iron ABC transporter, solute-binding protein                                                                                         | 3618 | 540786 | 541907 | 1.78412132  | 4.98037467 | 2.7915  |
| Iron ABC transporter, ATP-binding protein                                                                                            | 3617 | 541973 | 542749 | 0           | 2.39819588 | #DIV/0! |
| Vitamin B12 ABC transporter, permease component BtuC                                                                                 | 3616 | 542751 | 543791 | 1.923076923 | 0.89471154 | 0.46525 |
| Outer membrane protein of RND family multidrug efflux pump                                                                           | 3615 | 544265 | 545602 | 15.75393848 | 19.5453863 | 1.24067 |
| Probable Co/Zn/Cd efflux system membrane fusion protein                                                                              | 3614 | 545599 | 546717 | 13.47708895 | 19.2286613 | 1.42677 |
| RND multidrug efflux transporter; Acriflavin resistance protein                                                                      | 3613 | 546727 | 549894 | 12.74093434 | 28.5746488 | 2.24274 |
| RNA polymerase sigma factor RpoD                                                                                                     | 3612 | 549930 | 551678 | 94.39359268 | 91.5594966 | 0.96998 |
| hypothetical protein                                                                                                                 | 3611 | 551786 | 551935 | 13.42281879 | 6.24496644 | 0.46525 |
| hypothetical protein                                                                                                                 | 3610 | 551940 | 553481 | 22.06359507 | 13.284231  | 0.60209 |
| Ferredoxin                                                                                                                           | 3607 | 554021 | 554575 | 45.12635379 | 41.9900722 | 0.9305  |
| Rubrerythrin                                                                                                                         | 3606 | 554783 | 555328 | 1838.589981 | 1608.95362 | 0.8751  |

|                                                                                                            |      |        |        |             |            |         |
|------------------------------------------------------------------------------------------------------------|------|--------|--------|-------------|------------|---------|
| Peroxide stress regulator PerR, FUR family                                                                 | 3605 | 555528 | 555956 | 210.2803738 | 123.921729 | 0.58932 |
| Activator of 2-hydroxyglutaryl-CoA dehydratase                                                             | 3604 | 556233 | 560792 | 266.798419  | 339.589592 | 1.27283 |
| Cobyrinic acid A,C-diamide synthase                                                                        | 3603 | 560901 | 562280 | 203.7708484 | 201.754532 | 0.9901  |
| 2,3-butanediol dehydrogenase, R-alcohol forming, (R)- and (S)-acetoin-specific (EC 1.1.1.4)                | 3602 | 562351 | 563400 | 181.1248808 | 196.92183  | 1.08722 |
| Outer membrane protein                                                                                     | 3601 | 563530 | 564450 | 128.2608696 | 111.255435 | 0.86742 |
| Serine acetyltransferase (EC 2.3.1.30)                                                                     | 3600 | 564464 | 565348 | 238.6877828 | 228.414593 | 0.95696 |
| Fructokinase (EC 2.7.1.4)                                                                                  | 3599 | 565364 | 566344 | 65.30612245 | 78.8076531 | 1.20674 |
| Uncharacterized protein TP_0836                                                                            | 3598 | 566389 | 567135 | 50.9383378  | 58.6239946 | 1.15088 |
| TPR domain protein, putative component of TonB system                                                      | 3597 | 567462 | 568142 | 169.1176471 | 142.311765 | 0.8415  |
| NAD-reducing hydrogenase subunit HoxE (EC 1.12.1.2)                                                        | 3596 | 568364 | 568867 | 608.3499006 | 321.882704 | 0.52911 |
| NAD-reducing hydrogenase subunit HoxF (EC 1.12.1.2)                                                        | 3595 | 568876 | 570750 | 762.185324  | 555.209963 | 0.72844 |
| Periplasmic [Fe] hydrogenase large subunit (EC 1.12.7.2)                                                   | 3594 | 570760 | 572505 | 1132.951289 | 821.186246 | 0.72482 |
| FKBP-type peptidyl-prolyl cis-trans isomerase slyD (EC 5.2.1.8)                                            | 3593 | 572622 | 573152 | 1160.377358 | 1760.92736 | 1.51755 |
| hypothetical protein                                                                                       |      | 573275 | 573685 | 285.3658537 | 272.341463 | 0.95436 |
| Adenylate cyclase (EC 4.6.1.1)                                                                             | 3591 | 573698 | 576460 | 38.01593049 | 51.544714  | 1.35587 |
| hypothetical protein                                                                                       |      | 576489 | 576620 | 0           | 0          | #DIV/0! |
| Two-component response regulator                                                                           | 3589 | 576725 | 577396 | 5.961251863 | 4.16020864 | 0.69788 |
| hypothetical protein                                                                                       | 3588 | 577679 | 577792 | 0           | 8.23451327 | #DIV/0! |
| putative autotransporter protein                                                                           | 3587 | 577812 | 581858 | 4.201680672 | 3.67968364 | 0.87576 |
| hypothetical protein                                                                                       |      | 581904 | 582074 | 0           | 0          | #DIV/0! |
| Regulators of stationary/sporulation gene expression                                                       | 3585 | 582247 | 582501 | 31.49606299 | 25.6437008 | 0.81419 |
| hypothetical protein                                                                                       | 3584 | 582514 | 582909 | 2.53164557  | 0          | 0       |
| hypothetical protein                                                                                       |      | 582911 | 583033 | 8.196721311 | 0          | 0       |
| hypothetical protein                                                                                       | 3582 | 583048 | 583494 | 31.39013453 | 27.1221973 | 0.86404 |
| ABC transporter integral membrane protein                                                                  | 3581 | 583498 | 584646 | 62.71777003 | 85.1067073 | 1.35698 |
| ABC transporter integral membrane protein                                                                  | 3580 | 584643 | 585725 | 72.08872458 | 63.6386322 | 0.88278 |
| ABC-type sugar transport system, ATP-binding protein (EC 3.6.3.17)                                         | 3579 | 585722 | 587314 | 117.4623116 | 135.016018 | 1.14944 |
| Hypothetical lipoprotein                                                                                   | 3578 | 587382 | 588611 | 1406.834825 | 1651.27787 | 1.17375 |
| Hypothetical lipoprotein                                                                                   | 3577 | 588727 | 589947 | 620.1486375 | 759.92114  | 1.22539 |
| Tryptophanyl-tRNA synthetase (EC 6.1.1.2)                                                                  | 3576 | 590018 | 591016 | 244.6700508 | 312.685787 | 1.27799 |
| hypothetical protein                                                                                       | 3575 | 591126 | 592427 | 7.686395081 | 12.8739431 | 1.6749  |
| ATPase                                                                                                     | 3574 | 592619 | 593836 | 7.395234182 | 6.88126541 | 0.9305  |
| Nitroreductase                                                                                             | 3573 | 593916 | 594116 | 5           | 0          | 0       |
| Multi antimicrobial extrusion protein (Na <sup>+</sup> )/drug antiporter), MATE family of MDR efflux pumps | 3572 | 594124 | 595506 | 2.170767004 | 0          | 0       |
| Uroporphyrinogen-III decarboxylase-like                                                                    | 3571 | 595680 | 596672 | 15.12096774 | 1.87600806 | 0.12407 |
| Melibiose carrier protein, Na <sup>+</sup> /melibiose symporter                                            | 3570 | 596696 | 598060 | 8.797653959 | 3.41092375 | 0.38771 |
| Virulence-associated cell-wall-anchored protein SasH (LPXTG motif); 5'-nucleotidase (EC 3.1.3.5)           | 3569 | 598155 | 599636 | 14.85482782 | 9.42437542 | 0.63443 |

|                                                                                                                                |      |        |        |             |            |         |
|--------------------------------------------------------------------------------------------------------------------------------|------|--------|--------|-------------|------------|---------|
| Uroporphyrinogen-III decarboxylase                                                                                             | 3568 | 599770 | 600852 | 27.72643253 | 13.7597043 | 0.49627 |
| LysR family regulatory protein CidR                                                                                            | 3567 | 600966 | 601844 | 25.05694761 | 21.1958998 | 0.84591 |
| transcriptional regulator (Lrp/AsnC family)                                                                                    | 3566 | 601871 | 602344 | 202.9598309 | 114.099366 | 0.56218 |
| Alanine dehydrogenase (EC 1.4.1.1)                                                                                             | 3565 | 602581 | 603696 | 2462.780269 | 1433.72108 | 0.58216 |
| Amino acid transporter                                                                                                         | 3564 | 603721 | 605130 | 1449.254791 | 674.926189 | 0.46571 |
| Sodium-dependent phosphate transporter                                                                                         | 3563 | 605230 | 606906 | 102.6252983 | 83.8338305 | 0.81689 |
| Hydroxyacylglutathione hydrolase (EC 3.1.2.6)                                                                                  | 3562 | 606945 | 607592 | 126.7387944 | 136.626739 | 1.07802 |
| hypothetical protein                                                                                                           | 3561 | 607682 | 608851 | 46.19332763 | 55.7185629 | 1.2062  |
| Putative cytoplasmic protein                                                                                                   | 3560 | 609199 | 609567 | 187.3278237 | 161.491736 | 0.86208 |
| hypothetical protein                                                                                                           | 3559 | 609564 | 609770 | 325.2427184 | 239.400485 | 0.73607 |
| hypothetical protein                                                                                                           | 3558 | 609833 | 610060 | 52.86343612 | 8.19823789 | 0.15508 |
| hypothetical protein                                                                                                           |      | 610015 | 610158 | 41.95804196 | 58.5629371 | 1.39575 |
| hypothetical protein                                                                                                           | 3556 | 610195 | 610395 | 120         | 69.7875    | 0.58156 |
| hypothetical protein                                                                                                           |      | 610662 | 611093 | 18.56148492 | 17.2714617 | 0.9305  |
| Cold-shock DEAD-box protein A                                                                                                  | 3554 | 611674 | 612444 | 164.9350649 | 250.147403 | 1.51664 |
| hypothetical protein                                                                                                           | 3553 | 612428 | 612544 | 17.24137931 | 8.02155172 | 0.46525 |
| hypothetical protein                                                                                                           | 3552 | 612507 | 613373 | 35.79676674 | 47.2771363 | 1.32071 |
| 6-phosphofructokinase (EC 2.7.1.11)                                                                                            | 3551 | 613376 | 614479 | 120.5802357 | 139.195376 | 1.15438 |
| hypothetical protein                                                                                                           | 3550 | 614586 | 615413 | 56.83192261 | 43.8808948 | 0.77212 |
| hypothetical protein                                                                                                           | 3549 | 615404 | 615691 | 66.20209059 | 94.0226481 | 1.42024 |
| Putative DNA-binding protein                                                                                                   | 3548 | 615756 | 616307 | 5.444646098 | 3.37749546 | 0.62033 |
| Periplasmic [Fe] hydrogenase (EC 1.12.7.2)                                                                                     | 3547 | 616399 | 617298 | 1.112347052 | 0          | 0       |
| Oligopeptide ABC transporter, periplasmic oligopeptide-binding protein oppA (TC 3.A.1.5.1)                                     | 3546 | 617322 | 618968 | 0           | 2.82654921 | #DIV/0! |
| CO dehydrogenase accessory protein CooC (nickel insertion)                                                                     | 3545 | 619014 | 619784 | 0           | 1.20844156 | #DIV/0! |
| Inner membrane protein                                                                                                         | 3544 | 619801 | 621621 | 1.098901099 | 0.51126374 | 0.46525 |
| Putative glutathione transporter, ATP-binding component                                                                        | 3543 | 621618 | 624248 | 0           | 0.35380228 | #DIV/0! |
| Oligopeptide transport system permease protein oppB (TC 3.A.1.5.1)                                                             | 3542 | 624245 | 625225 | 0           | 0          | #DIV/0! |
| Nitrogenase iron protein (EC 1.18.6.1)                                                                                         | 3541 | 625411 | 626178 | 5.215123859 | 4.85267275 | 0.9305  |
| Nitrogenase molybdenum-iron protein alpha and beta chains-like protein                                                         | 3540 | 626175 | 627572 | 5.726556908 | 7.9928418  | 1.39575 |
| Nitrogenase vanadium-cofactor synthesis protein VnfN                                                                           | 3538 | 627672 | 628895 | 4.088307441 | 3.80417007 | 0.9305  |
| hypothetical protein                                                                                                           | 3539 | 628867 | 629118 | 0           | 0          | #DIV/0! |
| Lead, cadmium, zinc and mercury transporting ATPase (EC 3.6.3.3) (EC 3.6.3.5); Copper-translocating P-type ATPase (EC 3.6.3.4) | 3537 | 629131 | 631215 | 5.75815739  | 10.2694338 | 1.78346 |
| hypothetical protein                                                                                                           | 3536 | 631219 | 631452 | 17.16738197 | 87.8583691 | 5.11775 |
| conserved hypothetical protein; possible membrane protein                                                                      | 3535 | 631642 | 632055 | 4.842615012 | 0          | 0       |
| Ribose ABC transport system, permease protein RbsC (TC 3.A.1.2.1)                                                              | 3534 | 632074 | 633018 | 31.77966102 | 50.2706568 | 1.58185 |
| Sugar ABC transporter, permease protein                                                                                        | 3533 | 633015 | 634151 | 34.33098592 | 50.784331  | 1.47926 |
| sugar ABC transporter, ATP-binding protein                                                                                     | 3532 | 634138 | 635718 | 61.39240506 | 81.860443  | 1.3334  |
| putative lipoprotein                                                                                                           | 3531 | 635847 | 636929 | 1147.874307 | 1228.0536  | 1.06985 |
| 2',3'-cyclic-nucleotide 2'-phosphodiesterase (EC 3.1.4.16)                                                                     | 3530 | 637013 | 638968 | 440.9207161 | 505.944501 | 1.14747 |
| hypothetical protein                                                                                                           | 3529 | 639012 | 639641 | 52.46422893 | 44.3799682 | 0.84591 |

|                                                                     |      |        |        |             |            |         |
|---------------------------------------------------------------------|------|--------|--------|-------------|------------|---------|
| hypothetical protein                                                | 3528 | 639716 | 639943 | 4.405286344 | 0          | 0       |
| Putative deoxyribonuclease YcfH                                     | 3527 | 640086 | 640946 | 103.4883721 | 126.591279 | 1.22324 |
| Glutamine synthetase type III, GlnN (EC 6.3.1.2)                    | 3525 | 641148 | 643292 | 316.9245195 | 455.434599 | 1.43704 |
| hypothetical protein                                                |      | 643405 | 643536 | 7.633587786 | 0          | 0       |
| Probable two-component sensor, near polyamine transporter           | 3523 | 643589 | 644818 | 10.57770545 | 14.3852726 | 1.35996 |
| hypothetical protein                                                | 3522 | 644883 | 645503 | 17.74193548 | 16.508871  | 0.9305  |
| hypothetical protein                                                | 3521 | 645607 | 645801 | 30.92783505 | 9.59278351 | 0.31017 |
| BNR repeat domain protein                                           | 3520 | 645813 | 648089 | 13.18101933 | 18.806239  | 1.42677 |
| hypothetical protein                                                | 3519 | 648086 | 648466 | 2.631578947 | 2.44868421 | 0.9305  |
| Two-component response regulator yvqC                               | 3518 | 648537 | 649157 | 19.35483871 | 51.0274194 | 2.63642 |
| HicB                                                                | 3517 | 649443 | 649613 | 29.41176471 | 71.1558824 | 2.4193  |
| hypothetical protein                                                | 3516 | 649678 | 649911 | 218.8841202 | 95.8454936 | 0.43788 |
| hypothetical protein                                                | 3515 | 649904 | 650362 | 30.56768559 | 16.2532751 | 0.53171 |
| hypothetical protein                                                | 3514 | 650425 | 650658 | 12.87553648 | 0          | 0       |
| Nitrogen regulatory protein P-II                                    | 3513 | 650761 | 651102 | 96.77419355 | 79.1334311 | 0.81771 |
| Ammonium transporter precursor                                      | 3512 | 651114 | 652475 | 117.5606172 | 92.2979427 | 0.78511 |
| Mo/Fe-nitrogenase-specific transcriptional regulator NifA           | 3511 | 652707 | 654314 | 103.2980709 | 105.962352 | 1.02579 |
| hypothetical protein                                                | 3510 | 654649 | 655356 | 188.1188119 | 206.631542 | 1.09841 |
| Uncharacterized protein TP_1001                                     | 3509 | 655418 | 656443 | 20.48780488 | 30.8653659 | 1.50652 |
| Thioredoxin                                                         | 3508 | 656499 | 656822 | 235.2941176 | 152.682663 | 0.6489  |
| Methionine ABC transporter permease protein                         | 3507 | 656917 | 657585 | 23.95209581 | 26.4663174 | 1.10497 |
| Methionine ABC transporter ATP-binding protein                      | 3506 | 657572 | 658312 | 63.51351351 | 71.6736486 | 1.12848 |
| Response regulator                                                  | 3505 | 658473 | 659561 | 53.30882353 | 71.8400735 | 1.34762 |
| Sensory box histidine kinase/response regulator                     | 3504 | 659551 | 662514 | 44.3616661  | 48.8410091 | 1.10097 |
| hypothetical protein                                                | 3503 | 662654 | 662770 | 181.0344828 | 64.1724138 | 0.35448 |
| Aspartate carbamoyltransferase (EC 2.1.3.2)                         | 3502 | 662828 | 663751 | 46.5872156  | 40.3250271 | 0.86558 |
| Aspartate carbamoyltransferase regulatory chain (pyrI)              | 3501 | 663753 | 664187 | 18.43317972 | 34.3041475 | 1.861   |
| Dihydroorotase (EC 3.5.2.3)                                         | 3500 | 664230 | 665525 | 38.61003861 | 40.2378378 | 1.04216 |
| Dihydroorotate dehydrogenase electron transfer subunit (EC 1.3.3.1) | 3499 | 665529 | 666371 | 21.37767221 | 22.1021378 | 1.03389 |
| Dihydroorotate dehydrogenase, catalytic subunit (EC 1.3.3.1)        | 3498 | 666368 | 667273 | 40.8839779  | 55.521547  | 1.35803 |
| hypothetical protein                                                | 3497 | 667350 | 667940 | 171.1864407 | 233.413559 | 1.3635  |
| hypothetical protein                                                | 3496 | 667972 | 668526 | 814.0794224 | 739.025271 | 0.9078  |
| hypothetical protein                                                |      | 668548 | 668670 | 90.16393443 | 7.62704918 | 0.08459 |
| Orotidine 5'-phosphate decarboxylase (EC 4.1.1.23)                  | 3494 | 668754 | 669677 | 198.2665222 | 232.877031 | 1.17457 |
| Integral membrane protein                                           | 3493 | 669717 | 670625 | 158.5903084 | 120.924009 | 0.76249 |
| Nicotinamidase (EC 3.5.1.19)                                        | 3492 | 670612 | 671352 | 154.0540541 | 119.456081 | 0.77542 |
| Nicotinate phosphoribosyltransferase (EC 2.4.2.11)                  | 3491 | 671349 | 672797 | 103.5911602 | 95.1063536 | 0.91809 |
| Uridine kinase (EC 2.7.1.48)                                        | 3490 | 672799 | 674508 | 105.9098888 | 98.0046811 | 0.92536 |
| archaeal ATPase, fused to C-terminal DUF234 domain                  | 3489 | 674575 | 675885 | 16.03053435 | 15.6267176 | 0.97481 |
| Ribosomal large subunit pseudouridine synthase D (EC 4.2.1.70)      | 3488 | 675953 | 676912 | 19.81230448 | 27.1678832 | 1.37126 |

|                                                                                                              |      |        |        |             |            |         |
|--------------------------------------------------------------------------------------------------------------|------|--------|--------|-------------|------------|---------|
| hypothetical protein                                                                                         | 3487 | 676912 | 677442 | 156.6037736 | 112.362264 | 0.71749 |
| FIG018583: protein of unknown function                                                                       | 3486 | 677439 | 678134 | 87.76978417 | 65.6035971 | 0.74745 |
| Dimethyladenosine transferase (EC 2.1.1.-)                                                                   | 3485 | 678112 | 679050 | 93.81663113 | 81.3443497 | 0.86706 |
| ComEC/Rec2-related protein                                                                                   | 3484 | 679034 | 680590 | 44.34447301 | 53.2226864 | 1.20021 |
| hypothetical protein                                                                                         | 3483 | 680639 | 681685 | 187.3804971 | 160.124283 | 0.85454 |
| hypothetical protein                                                                                         | 3482 | 681817 | 682491 | 51.92878338 | 37.2752226 | 0.71781 |
| Flagellar protein flgJ [peptidoglycan hydrolase] (EC 3.2.1.-)                                                | 3481 | 682543 | 683055 | 238.28125   | 327.128906 | 1.37287 |
| Flagellar basal-body rod protein flgG                                                                        | 3480 | 683068 | 683865 | 410.7142857 | 554.264668 | 1.34951 |
| Flagellar basal-body rod protein flgF                                                                        | 3479 | 683881 | 684732 | 766.1574618 | 792.729142 | 1.03468 |
| hypothetical protein                                                                                         |      | 684733 | 684939 | 14.5631068  | 9.03398058 | 0.62033 |
| hypothetical protein                                                                                         | 3477 | 684899 | 685195 | 253.3783784 | 223.194257 | 0.88087 |
| hypothetical protein                                                                                         | 3476 | 685197 | 685454 | 202.3346304 | 152.066148 | 0.75156 |
| Helix-turn-helix domain protein                                                                              | 3475 | 685480 | 685842 | 52.48618785 | 46.2679558 | 0.88153 |
| hypothetical protein                                                                                         | 3474 | 685937 | 686149 | 231.1320755 | 263.349057 | 1.13939 |
| Predicted cell-wall-anchored protein SasA (LPXTG motif)                                                      | 3473 | 686215 | 687849 | 368.4210526 | 403.748164 | 1.09589 |
| Von Willebrand factor, type A                                                                                | 3472 | 687869 | 690157 | 249.1258741 | 203.750219 | 0.81786 |
| hypothetical protein                                                                                         | 3471 | 690256 | 690429 | 115.6069364 | 53.7861272 | 0.46525 |
| hypothetical protein                                                                                         | 3470 | 690426 | 690602 | 125         | 58.15625   | 0.46525 |
| Tyrosyl-tRNA synthetase (EC 6.1.1.1)                                                                         | 3469 | 690794 | 692044 | 193.6       | 297.76     | 1.53802 |
| Virulence factor mviN homolog                                                                                | 3468 | 692149 | 693768 | 79.06114886 | 97.7053737 | 1.23582 |
| Glutamate synthase [NADPH] small chain (EC 1.4.1.13)                                                         | 3467 | 693867 | 695330 | 91.59261791 | 154.553315 | 1.6874  |
| Glutamate synthase [NADPH] large chain (EC 1.4.1.13)                                                         | 3466 | 695471 | 700210 | 78.24427481 | 137.128393 | 1.75257 |
| Hydroxylamine reductase (EC 1.7.-.-)                                                                         | 3465 | 700784 | 702349 | 8.945686901 | 14.8642173 | 1.66161 |
| hypothetical protein                                                                                         |      | 702367 | 702498 | 7.633587786 | 7.10305344 | 0.9305  |
| Methyl-directed repair DNA adenine methylase (EC 2.1.1.72)                                                   | 3463 | 702582 | 703439 | 9.334889148 | 7.60035006 | 0.81419 |
| hypothetical protein                                                                                         | 3462 | 703411 | 703854 | 6.772009029 | 0          | 0       |
| Nucleotidyltransferase domain protein                                                                        | 3461 | 703844 | 704167 | 18.57585139 | 2.88080495 | 0.15508 |
| Aldo/keto reductase                                                                                          | 3460 | 704193 | 705353 | 103.4482759 | 94.6543103 | 0.91499 |
| hypothetical protein                                                                                         | 3459 | 705393 | 706082 | 206.095791  | 186.370102 | 0.90429 |
| Proline/sodium symporter PutP (TC 2.A.21.2.1) @                                                              |      |        |        |             |            |         |
| Propionate/sodium symporter                                                                                  | 3458 | 706161 | 707738 | 127.4571972 | 148.691186 | 1.1666  |
| hypothetical protein                                                                                         | 3455 | 708812 | 709105 | 2979.522184 | 1600.58703 | 0.5372  |
| COG0799: Uncharacterized homolog of plant lojap protein                                                      | 3454 | 709137 | 709496 | 373.2590529 | 295.479109 | 0.79162 |
| Transcriptional regulator                                                                                    | 3453 | 709471 | 710691 | 91.80327869 | 106.778689 | 1.16313 |
| Nicotinate-nucleotide adenyltransferase (EC 2.7.7.18) / Hydrolase (HAD superfamily), yqeK # fusion with NadD | 3452 | 710688 | 711857 | 101.7964072 | 124.968777 | 1.22763 |
| COG0536: GTP-binding protein Obg                                                                             | 3451 | 711861 | 712910 | 153.4795043 | 230.629171 | 1.50267 |
| LSU ribosomal protein L27p                                                                                   | 3450 | 713011 | 713295 | 1031.690141 | 1349.88028 | 1.30842 |
| hypothetical protein                                                                                         | 3449 | 713297 | 713638 | 1079.178886 | 1547.19501 | 1.43368 |
| LSU ribosomal protein L21p                                                                                   | 3448 | 713644 | 713976 | 1518.072289 | 1855.39458 | 1.2222  |
| hypothetical protein                                                                                         |      | 714083 | 714247 | 18.29268293 | 28.3689024 | 1.55083 |
| Phytoene synthase (EC 2.5.1.32)                                                                              | 3446 | 714305 | 715453 | 140.2439024 | 151.570993 | 1.08077 |
| 1-acyl-sn-glycerol-3-phosphate acyltransferase (EC 2.3.1.51)                                                 | 3445 | 715477 | 716232 | 103.3112583 | 117.082781 | 1.1333  |
| Na <sup>+</sup> driven multidrug efflux pump                                                                 | 3444 | 716229 | 717587 | 34.60972018 | 42.482327  | 1.22747 |



|                                                                              |      |        |        |             |            |         |
|------------------------------------------------------------------------------|------|--------|--------|-------------|------------|---------|
| Arginyl-tRNA synthetase (EC 6.1.1.19)                                        | 3443 | 717595 | 719424 | 162.2807018 | 172.42818  | 1.06253 |
| COG1496: Uncharacterized conserved protein                                   | 3442 | 719436 | 720206 | 115.5844156 | 125.677922 | 1.08733 |
| Uncharacterized protein TP_0110                                              | 3441 | 720203 | 721933 | 60.11560694 | 51.0968208 | 0.84998 |
| hypothetical protein                                                         | 3439 | 722504 | 722917 | 108.9588378 | 92.374092  | 0.84779 |
| hypothetical protein                                                         | 3438 | 722917 | 723480 | 145.6483126 | 100.81794  | 0.6922  |
| hypothetical protein                                                         |      | 723582 | 723695 | 0           | 0          | #DIV/0! |
| hypothetical protein                                                         | 3436 | 723789 | 723938 | 0           | 0          | #DIV/0! |
| Putative secreted protein                                                    | 3434 | 724640 | 725137 | 56.33802817 | 43.0613682 | 0.76434 |
| Pirin                                                                        | 3433 | 725162 | 725893 | 71.03064067 | 79.0536212 | 1.11295 |
| Adenine phosphoribosyltransferase (EC 2.4.2.7)                               | 3432 | 726072 | 726605 | 105.065666  | 122.204503 | 1.16313 |
| hypothetical protein                                                         | 3431 | 726730 | 727269 | 5.565862709 | 10.3580705 | 1.861   |
| Response regulator containing a CheY-like receiver domain and a GGDEF domain | 3430 | 727450 | 728355 | 89.50276243 | 123.381215 | 1.37852 |
| hypothetical protein                                                         | 3429 | 728520 | 729053 | 120.0750469 | 87.2889306 | 0.72695 |
| hypothetical protein                                                         | 3428 | 729607 | 729867 | 180.7692308 | 118.101923 | 0.65333 |
| PIN domain protein                                                           | 3427 | 729873 | 730307 | 78.34101382 | 77.1843318 | 0.98524 |
| radical activating enzyme                                                    | 3426 | 730323 | 731312 | 51.56723964 | 67.7411527 | 1.31365 |
| hypothetical protein                                                         | 3425 | 731422 | 731757 | 325.3731343 | 194.432836 | 0.59757 |
| RNA polymerase sigma-H factor AlgT                                           | 3424 | 731754 | 732314 | 92.85714286 | 58.15625   | 0.6263  |
| hypothetical protein                                                         | 3423 | 732311 | 732784 | 105.7082452 | 66.8858351 | 0.63274 |
| Ketoisovalerate oxidoreductase subunit vorC (EC 1.2.7.7)                     | 3422 | 732798 | 733028 | 1052.173913 | 473.341304 | 0.44987 |
| 2-oxoglutarate oxidoreductase, alpha subunit (EC 1.2.7.3)                    | 3421 | 733025 | 734155 | 211.5044248 | 230.566372 | 1.09013 |
| 2-oxoglutarate oxidoreductase, beta subunit (EC 1.2.7.3)                     | 3420 | 734152 | 734931 | 215.661104  | 314.148267 | 1.45668 |
| 2-oxoglutarate oxidoreductase, gamma subunit (EC 1.2.7.3)                    | 3419 | 734931 | 735464 | 185.7410882 | 195.527205 | 1.05269 |
| hypothetical protein                                                         | 3418 | 735517 | 735852 | 50.74626866 | 63.8850746 | 1.25891 |
| Cytotoxic translational repressor of toxin-antitoxin stability system        | 3417 | 735849 | 736199 | 85.71428571 | 53.1714286 | 0.62033 |
| Deoxyribose-phosphate aldolase (EC 4.1.2.4)                                  | 3416 | 736398 | 737135 | 75.98371777 | 59.3398915 | 0.78096 |
| B. burgdorferi predicted coding region BB0418                                | 3415 | 737246 | 738193 | 48.57444562 | 40.2856389 | 0.82936 |
| hypothetical protein                                                         | 3414 | 738321 | 739589 | 132.4921136 | 112.27642  | 0.84742 |
| Flagellar hook-length control protein fliK                                   |      | 739603 | 743517 | 65.66172713 | 67.7548544 | 1.03188 |
| putative autotransporter protein                                             | 3412 | 743514 | 746525 | 227.1670541 | 195.618233 | 0.86112 |
| Adenylate cyclase (EC 4.6.1.1)                                               | 3411 | 746631 | 748520 | 61.40815246 | 59.1106406 | 0.96259 |
| hypothetical protein                                                         | 3410 | 748513 | 751584 | 69.03288831 | 71.2040052 | 1.03145 |
| hypothetical protein                                                         | 3408 | 751574 | 752755 | 32.17612193 | 23.6367485 | 0.73461 |
| Methylated-DNA--protein-cysteine methyltransferase                           | 3409 | 752752 | 753087 | 98.50746269 | 105.549254 | 1.07148 |
| hypothetical protein                                                         |      | 753308 | 753433 | 8           | 0          | 0       |
| Transcriptional activator of maltose regulon, MalT                           | 3406 | 753509 | 756088 | 4.265219077 | 3.60798759 | 0.84591 |
| Transcriptional activator of maltose regulon, MalT                           | 3405 | 756145 | 758619 | 2.425222312 | 1.8805578  | 0.77542 |
| Transcriptional regulator, AraC family                                       | 3404 | 758820 | 760298 | 8.119079838 | 11.9617727 | 1.47329 |
| Two-component response regulator yesN                                        | 3403 | 760303 | 761916 | 5.57966522  | 5.19187849 | 0.9305  |
| 5-methyltetrahydrofolate--homocysteine methyltransferase (EC 2.1.1.13)       | 3402 | 761943 | 762581 | 20.37617555 | 23.3354232 | 1.14523 |
| FOG: WD40 repeat                                                             | 3401 | 762653 | 765697 | 22.99605782 | 29.3455979 | 1.27611 |

|                                                                                           |      |        |        |             |            |         |
|-------------------------------------------------------------------------------------------|------|--------|--------|-------------|------------|---------|
| Translation elongation factor LepA                                                        | 3399 | 765756 | 767576 | 178.3333333 | 170.591667 | 0.95659 |
| hypothetical protein                                                                      |      | 767563 | 767700 | 14.59854015 | 0          | 0       |
| hypothetical protein                                                                      | 3398 | 767738 | 771766 | 16.38530288 | 9.47132572 | 0.57804 |
| hypothetical protein                                                                      | 3397 | 771777 | 772859 | 44.36229205 | 40.4191312 | 0.91111 |
| Apoptotic chromatin condensation inducer in the nucleus                                   | 3396 | 772934 | 773953 | 180.5691855 | 154.322375 | 0.85464 |
| hypothetical protein                                                                      |      | 773983 | 774198 | 0           | 4.32790698 | #DIV/0! |
| hypothetical protein                                                                      | 3394 | 774327 | 775523 | 775.9197324 | 502.594482 | 0.64774 |
| hypothetical protein                                                                      | 3393 | 775548 | 775973 | 465.8823529 | 258.350588 | 0.55454 |
| hypothetical protein                                                                      | 3391 | 775987 | 776970 | 138.3519837 | 85.1932859 | 0.61577 |
| Uncharacterized protein TP_0930                                                           | 3392 | 776967 | 778637 | 32.33532934 | 54.6041916 | 1.68869 |
| Uncharacterized protein TP_0928                                                           | 3390 | 778641 | 780185 | 483.1606218 | 552.032383 | 1.14254 |
| Branched-chain amino acid aminotransferase (EC 2.6.1.42)                                  | 3389 | 780483 | 781568 | 348.3870968 | 518.85023  | 1.48929 |
| Outer membrane protein/protective antigen                                                 |      |        |        |             |            |         |
| OMA87-like precursor                                                                      | 3388 | 781590 | 782885 | 111.969112  | 147.299228 | 1.31553 |
| Glycosyltransferase                                                                       | 3387 | 782891 | 784114 | 130.0081766 | 149.123467 | 1.14703 |
| hypothetical protein                                                                      |      | 784264 | 784377 | 0           | 0          | #DIV/0! |
| Histone H1-like protein                                                                   | 3384 | 784361 | 784609 | 6681.451613 | 7166.35081 | 1.07257 |
| Chromate transport protein                                                                | 3383 | 784695 | 785246 | 14.51905626 | 32.0862069 | 2.20994 |
| Chromate transport protein                                                                | 3382 | 785243 | 785812 | 43.93673111 | 58.8717047 | 1.33992 |
| Aspartyl-tRNA synthetase (EC 6.1.1.12)                                                    | 3381 | 785892 | 787748 | 115.8405172 | 128.344828 | 1.10794 |
| hypothetical protein                                                                      | 3380 | 787773 | 787889 | 0           | 0          | #DIV/0! |
| hypothetical protein                                                                      | 3379 | 788087 | 788392 | 6.557377049 | 3.05081967 | 0.46525 |
| Outer membrane lipoprotein omp16 precursor                                                | 3378 | 788439 | 789641 | 46.5890183  | 40.2545757 | 0.86404 |
| hypothetical protein                                                                      | 3377 | 789676 | 789819 | 6.993006993 | 6.50699301 | 0.9305  |
| hypothetical protein                                                                      | 3376 | 789876 | 790367 | 40.73319756 | 34.1120163 | 0.83745 |
| Cold-shock DNA-binding domain protein                                                     | 3375 | 790529 | 791476 | 79.19746568 | 62.8848997 | 0.79403 |
| Oxidoreductase (EC 1.1.1.-)                                                               | 3374 | 791491 | 792660 | 125.748503  | 140.092387 | 1.11407 |
| Ferric siderophore transport system, periplasmic binding protein TonB                     | 3373 | 792713 | 793384 | 90.90909091 | 117.872578 | 1.2966  |
| Biopolymer transport protein ExbD/ToIR                                                    | 3372 | 793377 | 793775 | 206.0301508 | 151.96608  | 0.73759 |
| Biopolymer transport protein                                                              | 3371 | 793772 | 794185 | 133.1719128 | 92.374092  | 0.69365 |
| MotA/ToIQ/ExbB proton channel family protein                                              | 3370 | 794182 | 794826 | 212.7329193 | 192.168478 | 0.90333 |
| hypothetical protein                                                                      | 3369 | 794835 | 795686 | 162.1621622 | 148.705053 | 0.91701 |
| hypothetical protein                                                                      | 3368 | 795689 | 795931 | 152.892562  | 119.196281 | 0.77961 |
| hypothetical protein                                                                      |      | 795891 | 796034 | 27.97202797 | 0          | 0       |
| DNA repair protein RadC                                                                   | 3367 | 796031 | 796813 | 1.278772379 | 2.3797954  | 1.861   |
| Oxidoreductase, aldo/keto reductase family                                                | 3365 | 796942 | 798102 | 104.3103448 | 123.531897 | 1.18427 |
| hypothetical protein                                                                      | 3364 | 798202 | 798447 | 1506.122449 | 2677.56122 | 1.77778 |
| Inner membrane protein CreD                                                               | 3363 | 798569 | 799219 | 72.30769231 | 65.8507692 | 0.9107  |
| tRNA dihydrouridine synthase B (EC 1.-.-.-)                                               | 3362 | 799227 | 800264 | 28.92960463 | 31.4054966 | 1.08558 |
| Chemotaxis regulator - transmits chemoreceptor signals to flagellar motor components CheY | 3361 | 800436 | 800873 | 773.4553776 | 832.552632 | 1.07641 |
| Flavoprotein                                                                              | 3360 | 801042 | 802259 | 427.2801972 | 509.21364  | 1.19176 |
| N-acetylglucosamine-6-phosphate deacetylase (EC 3.5.1.25)                                 | 3359 | 802980 | 804116 | 191.9014085 | 154.810299 | 0.80672 |
| Glucosamine-6-phosphate deaminase (EC 3.5.99.6)                                           | 3358 | 804131 | 804922 | 145.3855879 | 144.692162 | 0.99523 |
| Argininosuccinate lyase (EC 4.3.2.1)                                                      | 3357 | 805025 | 806431 | 151.4935989 | 162.142603 | 1.07029 |
| motif=sugar transport proteins signatures                                                 | 3356 | 806521 | 806907 | 69.94818653 | 40.9805699 | 0.58587 |

|                                                                                                       |      |        |        |             |            |         |
|-------------------------------------------------------------------------------------------------------|------|--------|--------|-------------|------------|---------|
| hypothetical protein                                                                                  | 3355 | 806886 | 807143 | 89.49416342 | 54.3093385 | 0.60685 |
| DNA-binding protein                                                                                   | 3354 | 807268 | 807606 | 2.958579882 | 2.75295858 | 0.9305  |
| hypothetical protein                                                                                  | 3353 | 807766 | 808074 | 25.97402597 | 6.04220779 | 0.23263 |
| hypothetical protein                                                                                  | 3352 | 808071 | 809087 | 2.952755906 | 2.74753937 | 0.9305  |
| hypothetical protein                                                                                  | 3351 | 809245 | 809451 | 58.25242718 | 49.6868932 | 0.85296 |
| Argininosuccinate synthase (EC 6.3.4.5)                                                               | 3350 | 809647 | 810948 | 470.3618168 | 660.447267 | 1.40413 |
| N-acyl-L-amino acid amidohydrolase (EC 3.5.1.14)                                                      | 3349 | 811039 | 812247 | 21.52317881 | 38.5140728 | 1.78942 |
| Sensor histidine protein kinase UhpB, glucose-6-phosphate specific (EC 2.7.13.3)                      | 3348 | 812234 | 813520 | 73.09486781 | 61.5027216 | 0.84141 |
| Transcriptional regulatory protein UhpA                                                               | 3347 | 813513 | 814133 | 19.35483871 | 33.0177419 | 1.70592 |
| amino acid ABC transporter, permease protein                                                          | 3346 | 814269 | 814967 | 0           | 0          | #DIV/0! |
| amino acid ABC transporter, amino acid-binding protein                                                | 3345 | 815016 | 815834 | 2.444987775 | 1.13753056 | 0.46525 |
| Probable amino-acid ABC transporter permease protein ytmM                                             | 3344 | 815869 | 816606 | 0           | 1.26255088 | #DIV/0! |
| amino acid ABC transporter, ATP-binding protein                                                       | 3343 | 816603 | 817361 | 0           | 1.22757256 | #DIV/0! |
| Lantibiotic modifying enzyme                                                                          | 3342 | 817374 | 818738 | 2.93255132  | 0.68218475 | 0.23263 |
| hypothetical protein                                                                                  | 3341 | 818869 | 819186 | 15.77287066 | 11.7413249 | 0.7444  |
| amino acid ABC transporter, permease protein                                                          | 3340 | 819345 | 820043 | 1.432664756 | 0          | 0       |
| amino acid ABC transporter, amino acid-binding protein                                                | 3339 | 820078 | 820887 | 2.472187886 | 1.15018541 | 0.46525 |
| Probable amino-acid ABC transporter permease protein ytmM                                             | 3338 | 820916 | 821626 | 0           | 2.62112676 | #DIV/0! |
| amino acid ABC transporter, ATP-binding protein                                                       | 3337 | 821623 | 822381 | 0           | 0          | #DIV/0! |
| Lantibiotic modifying enzyme                                                                          | 3336 | 822392 | 823783 | 5.751258088 | 4.01365924 | 0.69788 |
| iron-sulfur flavoprotein                                                                              | 3335 | 823802 | 824359 | 25.13464991 | 18.3761221 | 0.73111 |
| Acetylornithine aminotransferase (EC 2.6.1.11)                                                        | 3334 | 824372 | 825736 | 93.84164223 | 68.9006598 | 0.73422 |
| Acetylglutamate kinase (EC 2.7.2.8)                                                                   | 3333 | 825729 | 826619 | 102.1814007 | 108.967853 | 1.06642 |
| N-acetyl-gamma-glutamyl-phosphate reductase (EC 1.2.1.38)                                             | 3332 | 826638 | 827780 | 120.3866432 | 102.207821 | 0.849   |
| hypothetical protein                                                                                  | 3331 | 828050 | 828421 | 179.8365123 | 139.448229 | 0.77542 |
| Glycerol kinase (EC 2.7.1.30)                                                                         | 3330 | 828470 | 829954 | 94.55782313 | 118.369728 | 1.25182 |
| Putative malate dehydrogenase (EC 1.1.1.37), similar to archaeal MJ1425                               | 3329 | 829974 | 831083 | 291.2533814 | 335.617674 | 1.15232 |
| Glycerol-3-phosphate ABC transporter, periplasmic glycerol-3-phosphate-binding protein (TC 3.A.1.1.3) | 3328 | 831158 | 832477 | 1278.999242 | 1537.19447 | 1.20187 |
| SN-glycerol-3-phosphate transport system permease protein ugpE (TC 3.A.1.1.3)                         | 3327 | 832555 | 833379 | 115.2912621 | 118.570995 | 1.02845 |
| SN-glycerol-3-phosphate transport system permease protein ugpA (TC 3.A.1.1.3)                         | 3326 | 833376 | 834251 | 106.2857143 | 141.436    | 1.33072 |
| Glycerophosphoryl diester phosphodiesterase (EC 3.1.4.46)                                             | 3325 | 834320 | 835138 | 106.3569682 | 136.503667 | 1.28345 |
| Conserved domain protein                                                                              | 3323 | 835275 | 835835 | 12.5        | 16.6160714 | 1.32929 |
| hypothetical protein                                                                                  |      | 835816 | 835992 | 5.681818182 | 10.5738636 | 1.861   |
| Plasmid maintenance system killer                                                                     | 3322 | 836035 | 836316 | 110.3202847 | 43.0480427 | 0.39021 |
| Virulence associated protein                                                                          | 3321 | 836374 | 836676 | 119.205298  | 73.9470199 | 0.62033 |
| Conserved domain protein                                                                              | 3320 | 837199 | 838164 | 121.2435233 | 107.995855 | 0.89074 |
| Uncharacterized protein y4uA                                                                          | 3319 | 838478 | 839986 | 1.98938992  | 4.31929708 | 2.17117 |



|                                                                                                          |      |        |        |             |            |         |
|----------------------------------------------------------------------------------------------------------|------|--------|--------|-------------|------------|---------|
| Possible membrane transport protein                                                                      | 3318 | 840011 | 841285 | 0.784929356 | 2.1911303  | 2.7915  |
| Putative enzyme                                                                                          | 3317 | 841426 | 843720 | 2.615518745 | 2.43374019 | 0.9305  |
| Citrate lyase alpha chain (EC 4.1.3.6)                                                                   | 3316 | 843723 | 845261 | 1.300390117 | 1.210013   | 0.9305  |
| Citrate lyase beta chain (EC 4.1.3.6)                                                                    | 3315 | 845258 | 846166 | 1.101321586 | 2.04955947 | 1.861   |
| Citrate lyase gamma chain, acyl carrier protein (EC 4.1.3.6)                                             | 3314 | 846145 | 846441 | 6.756756757 | 0          | 0       |
| PrpF protein involved in 2-methylcitrate cycle                                                           | 3313 | 846465 | 847625 | 3.448275862 | 2.40646552 | 0.69788 |
| Transcriptional regulator, LysR family                                                                   | 3312 | 847700 | 848608 | 12.11453744 | 10.2477974 | 0.84591 |
| hypothetical protein                                                                                     |      | 848628 | 848762 | 0           | 6.94402985 | #DIV/0! |
| Conserved domain protein                                                                                 | 3310 | 849023 | 849433 | 17.07317073 | 61.2768293 | 3.58907 |
| hypothetical protein                                                                                     | 3309 | 849443 | 850282 | 11.91895113 | 23.2902265 | 1.95405 |
| Chaperone protein DnaJ                                                                                   | 3308 | 850287 | 850991 | 11.36363636 | 19.8259943 | 1.74469 |
| Chaperone protein DnaK                                                                                   | 3307 | 851014 | 852744 | 10.40462428 | 20.4387283 | 1.96439 |
| hypothetical protein                                                                                     | 3306 | 852781 | 853245 | 4.310344828 | 4.01077586 | 0.9305  |
| hypothetical protein                                                                                     | 3305 | 853259 | 853930 | 5.961251863 | 2.77347243 | 0.46525 |
| membrane protein                                                                                         | 3304 | 853933 | 854688 | 6.622516556 | 16.0218543 | 2.4193  |
| Glutathione peroxidase (EC 1.11.1.9)                                                                     | 3303 | 854751 | 855281 | 37.73584906 | 54.4254717 | 1.44228 |
| NAD-reducing hydrogenase subunit HoxE (EC 1.12.1.2)                                                      | 3302 | 855510 | 856001 | 1234.215886 | 941.870672 | 0.76313 |
| NAD-reducing hydrogenase subunit HoxF (EC 1.12.1.2)                                                      | 3301 | 856014 | 857918 | 835.6092437 | 652.425158 | 0.78078 |
| Periplasmic [Fe] hydrogenase large subunit (EC 1.12.7.2)                                                 | 3300 | 857921 | 859663 | 1268.656716 | 1147.90155 | 0.90482 |
| hypothetical protein                                                                                     | 3299 | 859847 | 860881 | 325.9187621 | 269.071083 | 0.82558 |
| hypothetical protein                                                                                     | 3298 | 861130 | 861879 | 861.1481976 | 1034.85514 | 1.20172 |
| Alcohol dehydrogenase (EC 1.1.1.1);                                                                      |      |        |        |             |            |         |
| Acetaldehyde dehydrogenase (EC 1.2.1.10)                                                                 | 3297 | 861876 | 864512 | 1020.485584 | 1132.06127 | 1.10934 |
| Uncharacterized protein TP_0625                                                                          | 3296 | 864664 | 865044 | 205.2631579 | 208.138158 | 1.01401 |
| Oligopeptide transport ATP-binding protein oppD (TC 3.A.1.5.1)                                           | 3295 | 865132 | 865710 | 17.30103806 | 9.65916955 | 0.5583  |
| ATPase component NikO of energizing module of nickel ECF transporter                                     | 3294 | 865751 | 866524 | 102.1992238 | 81.85511   | 0.80094 |
| Transmembrane component NikQ of energizing module of nickel ECF transporter                              | 3293 | 866512 | 867330 | 141.809291  | 100.102689 | 0.7059  |
| Core component NikM of nickel ECF transporter / Additional core component NikN of nickel ECF transporter | 3292 | 867358 | 868365 | 283.0188679 | 132.136544 | 0.46688 |
| hypothetical protein                                                                                     | 3291 | 868594 | 868797 | 4.926108374 | 4.58374384 | 0.9305  |
| hypothetical protein                                                                                     | 3290 | 868868 | 869035 | 269.4610778 | 16.7155689 | 0.06203 |
| DNA polymerase III alpha subunit (EC 2.7.7.7)                                                            | 3289 | 869227 | 869886 | 95.59939302 | 5.64795144 | 0.05908 |
| Periplasmic [Fe] hydrogenase large subunit (EC 1.12.7.2)                                                 | 3288 | 870374 | 872107 | 80.7847663  | 864.457588 | 10.7008 |
| NAD-reducing hydrogenase subunit HoxF (EC 1.12.1.2)                                                      | 3287 | 872126 | 874009 | 97.18534254 | 1030.81413 | 10.6067 |
| NAD-reducing hydrogenase subunit HoxE (EC 1.12.1.2)                                                      | 3286 | 874002 | 874493 | 183.299389  | 2230.54684 | 12.1689 |
| hypothetical protein                                                                                     |      | 874542 | 874673 | 0           | 0          | #DIV/0! |
| Methionine biosynthesis and transport regulator MtaR, LysR family                                        | 3284 | 874786 | 875715 | 26.91065662 | 161.259957 | 5.99242 |
| Periplasmic [Fe] hydrogenase (EC 1.12.7.2)                                                               | 3283 | 875727 | 877490 | 39.13783324 | 194.755814 | 4.97615 |
| hypothetical protein                                                                                     | 3282 | 877487 | 878695 | 47.18543046 | 229.543874 | 4.86472 |
| predicted protein                                                                                        | 3281 | 879668 | 880534 | 83.1408776  | 33.3088915 | 0.40063 |

|                                                                                              |      |                  |                  |                            |                         |                    |
|----------------------------------------------------------------------------------------------|------|------------------|------------------|----------------------------|-------------------------|--------------------|
| Methyltransferase (EC 2.1.1.-)<br>hypothetical protein                                       | 3280 | 880524<br>881534 | 881393<br>881680 | 56.38665132<br>226.0273973 | 36.406214<br>31.8664384 | 0.64565<br>0.14098 |
| Ubiquinone biosynthesis SAM-dependent O-<br>methyltransferase (EC 2.1.1.-)                   | 3278 | 881732           | 882385           | 1356.814701                | 183.820061              | 0.13548            |
| Periplasmic binding protein precursor                                                        | 3277 | 882407           | 883468           | 1388.312912                | 256.961828              | 0.18509            |
| Iron(III) dicitrate transport system permease<br>protein fecD (TC 3.A.1.14.1)                | 3276 | 883461           | 884558           | 506.8368277                | 127.233364              | 0.25103            |
| Vitamin B12 ABC transporter, ATPase<br>component BtuD                                        | 3275 | 884552           | 885319           | 447.1968709                | 116.464146              | 0.26043            |
| Formylmethanofuran dehydrogenase subunit E                                                   | 3274 | 885421           | 885945           | 692.7480916                | 111.873092              | 0.16149            |
| Periplasmic binding protein precursor                                                        | 3273 | 885955           | 887037           | 697.7818854                | 77.3983364              | 0.11092            |
| Transport system permease protein precursor                                                  | 3272 | 887030           | 888097           | 359.8875351                | 47.9639175              | 0.13327            |
| ABC-type cobalamin/Fe <sup>3+</sup> -siderophores transport<br>systems, ATPase components    | 3271 | 888094           | 888861           | 232.0730117                | 69.1505867              | 0.29797            |
| Dipeptide-binding ABC transporter, periplasmic<br>substrate-binding component (TC 3.A.1.5.2) | 3270 | 888911           | 890509           | 1202.753442                | 406.438673              | 0.33792            |
| Dipeptide transport system permease protein<br>dppB (TC 3.A.1.5.2)                           | 3269 | 890514           | 891500           | 775.862069                 | 265.183063              | 0.34179            |
| Dipeptide transport system permease protein<br>dppC (TC 3.A.1.5.2)                           | 3268 | 891497           | 892330           | 429.7719088                | 122.87515               | 0.28591            |
| Dipeptide transport ATP-binding protein dppD (TC<br>3.A.1.5.2)                               | 3267 | 892335           | 893267           | 531.1158798                | 214.65397               | 0.40416            |
| Dipeptide transport ATP-binding protein dppF (TC<br>3.A.1.5.2)                               | 3266 | 893251           | 893922           | 697.466468                 | 242.678838              | 0.34794            |
| Aspartate aminotransferase (EC 2.6.1.1)                                                      | 3265 | 894043           | 895332           | 194.7245927                | 160.978666              | 0.8267             |
| MoxR-like ATPase in aerotolerance operon                                                     | 3264 | 895416           | 896549           | 120.3208556                | 97.8600713              | 0.81333            |
| hypothetical protein                                                                         | 3263 | 896559           | 897467           | 83.70044053                | 100.428414              | 1.19986            |
| hypothetical protein                                                                         | 3262 | 897464           | 898480           | 43.30708661                | 43.0447835              | 0.99394            |
| BatA (Bacteroides aerotolerance operon)                                                      | 3261 | 898477           | 899478           | 37.96203796                | 48.3376623              | 1.27332            |
| BatB                                                                                         | 3260 | 899475           | 900554           | 38.92493049                | 41.3938832              | 1.06343            |
| lipoprotein, putative                                                                        | 3258 | 900547           | 901191           | 35.71428571                | 40.4565217              | 1.13278            |
| hypothetical protein                                                                         |      | 901188           | 901325           | 51.09489051                | 88.2956204              | 1.72807            |
| hypothetical protein                                                                         | 3257 | 901380           | 902813           | 34.1939986                 | 45.4535939              | 1.32929            |
| Uncharacterized protein TP_0674                                                              | 3256 | 902827           | 903447           | 66.12903226                | 73.5395161              | 1.11206            |
| Translation initiation factor 1                                                              | 3255 | 903456           | 903680           | 553.5714286                | 440.325893              | 0.79543            |
| 3-phosphoshikimate 1-carboxyvinyltransferase<br>(EC 2.5.1.19)                                | 3254 | 903908           | 905278           | 151.0948905                | 164.365693              | 1.08783            |
| hypothetical protein                                                                         |      | 905348           | 905629           | 103.202847                 | 69.5391459              | 0.67381            |
| hypothetical protein                                                                         |      | 905619           | 905765           | 47.94520548                | 82.8527397              | 1.72807            |
| Flagellar hook-length control protein fliK                                                   |      | 906182           | 909742           | 22.19101124                | 21.955618               | 0.98939            |
| hypothetical protein                                                                         | 3250 | 910298           | 910453           | 19.35483871                | 6.00322581              | 0.31017            |
| transcriptional regulator, PemK family                                                       | 3249 | 910440           | 910787           | 11.52737752                | 8.04466859              | 0.69788            |
| Transposase IS4 family protein                                                               | 3248 | 910853           | 911206           | 16.99716714                | 5.27195467              | 0.31017            |
| Nucleotidyltransferase family protein                                                        | 3247 | 911452           | 911805           | 14.16430595                | 5.27195467              | 0.3722             |
| hypothetical protein                                                                         | 3246 | 911792           | 912013           | 0                          | 0                       | #DIV/0!            |
| hypothetical protein                                                                         |      | 912101           | 912235           | 0                          | 0                       | #DIV/0!            |
| hypothetical protein                                                                         | 3243 | 912537           | 913157           | 188.3116883                | 126.886364              | 0.67381            |
| hypothetical protein                                                                         | 3244 | 913147           | 913278           | 7.633587786                | 7.10305344              | 0.9305             |
| Trk system potassium uptake protein trkA                                                     | 3242 | 913250           | 914695           | 64.40443213                | 77.9712604              | 1.21065            |
| Potassium uptake protein TrkH                                                                | 3241 | 914692           | 916137           | 42.21453287                | 63.750519               | 1.51016            |
| lrgA-associated membrane protein LrgB                                                        | 3240 | 916175           | 916852           | 73.85524372                | 126.44904               | 1.71212            |
| Antiholin-like protein LrgA                                                                  | 3239 | 916855           | 917211           | 39.3258427                 | 44.4339888              | 1.12989            |

|                                                                                                           |      |        |        |             |            |         |
|-----------------------------------------------------------------------------------------------------------|------|--------|--------|-------------|------------|---------|
| Cell surface protein                                                                                      | 3238 | 917425 | 919803 | 150.9671993 | 94.3021447 | 0.62465 |
| Conserved protein                                                                                         | 3237 | 919814 | 920455 | 280.8112324 | 264.198128 | 0.94084 |
| Molecular chaperone (small heat shock protein)                                                            | 3236 | 920627 | 921082 | 13.18681319 | 18.4054945 | 1.39575 |
| hypothetical protein                                                                                      |      | 921188 | 921370 | 0           | 0          | #DIV/0! |
| DNA-damage-inducible protein J                                                                            | 3234 | 921482 | 921763 | 131.6725979 | 155.635231 | 1.18199 |
| AviX3                                                                                                     | 3233 | 921756 | 922019 | 72.24334601 | 60.1463878 | 0.83255 |
| hypothetical protein                                                                                      | 3232 | 922031 | 922465 | 62.21198157 | 102.912442 | 1.65422 |
| hypothetical protein                                                                                      | 3231 | 922468 | 922587 | 0           | 0          | #DIV/0! |
| Cell surface protein IsdA, transfers heme from hemoglobin to apo-IsdC                                     | 3230 | 922612 | 923670 | 5.671077505 | 7.03591682 | 1.24067 |
| Leucyl-tRNA synthetase (EC 6.1.1.4)                                                                       | 3229 | 923827 | 926316 | 191.7973462 | 214.011259 | 1.11582 |
| Permeases of the major facilitator superfamily                                                            | 3228 | 926340 | 927530 | 99.15966387 | 114.162185 | 1.1513  |
| Prephenate and/or arogenate dehydrogenase (unknown specificity) (EC 1.3.1.12)(EC 1.3.1.43) # NAD-specific | 3227 | 927783 | 928649 | 117.7829099 | 495.33545  | 4.2055  |
| 2-keto-3-deoxy-D-arabino-heptulosonate-7-phosphate synthase I beta (EC 2.5.1.54)                          | 3226 | 928662 | 929687 | 155.1219512 | 486.583415 | 3.13678 |
| hypothetical protein                                                                                      |      | 929680 | 929856 | 159.0909091 | 174.46875  | 1.09666 |
| hypothetical protein                                                                                      |      | 929981 | 930226 | 0           | 0          | #DIV/0! |
| hypothetical protein                                                                                      | 3223 | 930386 | 933067 | 252.1447221 | 142.993659 | 0.56711 |
| hypothetical protein                                                                                      | 3222 | 933153 | 933275 | 8.196721311 | 0          | 0       |
| Thiamin ABC transporter, ATPase component                                                                 | 3221 | 933420 | 934490 | 36.44859813 | 26.9584112 | 0.73963 |
| Thiamin ABC transporter, transmembrane component                                                          | 3220 | 934480 | 936267 | 6.155567991 | 5.20705092 | 0.84591 |
| Thiamin ABC transporter, substrate-binding component                                                      | 3219 | 936237 | 937283 | 19.12045889 | 13.3436902 | 0.69788 |
| hypothetical protein                                                                                      | 3218 | 937348 | 937512 | 225.6097561 | 107.801829 | 0.47782 |
| Circadian phase modifier                                                                                  | 3217 | 937612 | 938325 | 133.2398317 | 182.706872 | 1.37126 |
| UPF0272 protein CA_C0774                                                                                  | 3216 | 938306 | 939712 | 246.0881935 | 219.057966 | 0.89016 |
| ATP-utilizing enzyme of the PP-loop superfamily                                                           | 3215 | 939722 | 940552 | 157.8313253 | 158.072892 | 1.00153 |
| Permease of the major facilitator superfamily                                                             | 3214 | 941127 | 942332 | 82.15767635 | 115.057676 | 1.40045 |
| hypothetical protein                                                                                      | 3213 | 942332 | 942793 | 75.92190889 | 98.9034707 | 1.3027  |
| NADPH nitroreductase                                                                                      | 3212 | 942795 | 943319 | 175.5725191 | 156.267176 | 0.89004 |
| hypothetical protein                                                                                      | 3211 | 943408 | 943560 | 118.4210526 | 116.3125   | 0.98219 |
| ATP phosphoribosyltransferase (EC 2.4.2.17)                                                               | 3210 | 943582 | 944436 | 228.3372365 | 228.811475 | 1.00208 |
| Imidazoleglycerol-phosphate dehydratase (EC 4.2.1.19)                                                     | 3209 | 944474 | 945100 | 261.9808307 | 181.34345  | 0.6922  |
| Imidazole glycerol phosphate synthase amidotransferase subunit (EC 2.4.2.-)                               | 3208 | 945114 | 945743 | 127.1860095 | 112.429253 | 0.88398 |
| Imidazole glycerol phosphate synthase cyclase subunit (EC 4.1.3.-)                                        | 3207 | 945771 | 946571 | 231.25      | 210.525625 | 0.91038 |
| Phosphoribosyl-AMP cyclohydrolase (EC 3.5.4.19) / Phosphoribosyl-ATP pyrophosphatase (EC 3.6.1.31)        | 3206 | 946565 | 947881 | 186.1702128 | 161.211246 | 0.86593 |
| Histidinol-phosphate aminotransferase (EC 2.6.1.9)                                                        | 3205 | 947878 | 948939 | 111.2158341 | 86.8232799 | 0.78067 |
| Histidinol dehydrogenase (EC 1.1.1.23)                                                                    | 3204 | 948981 | 951149 | 72.87822878 | 90.9898524 | 1.24852 |
| Transcriptional regulator                                                                                 | 3203 | 951152 | 951652 | 22          | 14.888     | 0.67673 |
| hypothetical protein                                                                                      |      | 951703 | 951843 | 0           | 0          | #DIV/0! |
| hypothetical protein                                                                                      | 3201 | 951974 | 953170 | 4236.622074 | 3636.4189  | 0.85833 |

|                                                                                                      |      |         |         |             |            |         |
|------------------------------------------------------------------------------------------------------|------|---------|---------|-------------|------------|---------|
| DNA repair protein RadA                                                                              | 3200 | 953243  | 954646  | 104.2857143 | 105.678214 | 1.01335 |
| hypothetical protein                                                                                 | 3199 | 954695  | 954895  | 0           | 0          | #DIV/0! |
| hypothetical protein                                                                                 | 3198 | 955239  | 956414  | 114.0425532 | 140.168936 | 1.22909 |
| Kynurenine formamidase, bacterial (EC 3.5.1.9)                                                       | 3197 | 956537  | 957205  | 32.93413174 | 72.4341317 | 2.19936 |
| Chaperone protein HtpG                                                                               | 3196 | 957207  | 959114  | 142.6324069 | 315.696644 | 2.21336 |
| hypothetical protein                                                                                 | 3195 | 959256  | 959384  | 0           | 0          | #DIV/0! |
| Sensory box histidine kinase/response regulator                                                      | 3194 | 959390  | 961825  | 86.02150538 | 80.0430108 | 0.9305  |
| Putative cytochrome C-type biogenesis protein                                                        | 3193 | 961828  | 962538  | 5.633802817 | 5.24225352 | 0.9305  |
| Cytochrome c-type biogenesis protein                                                                 |      |         |         |             |            |         |
| CcsA/ResC                                                                                            | 3192 | 962543  | 963328  | 7.643312102 | 4.74140127 | 0.62033 |
| hypothetical protein                                                                                 | 3191 | 963374  | 965803  | 32.52367229 | 29.1140387 | 0.89516 |
| Uracil-DNA glycosylase (EC 3.2.2.-)                                                                  | 3190 | 965800  | 966006  | 106.7961165 | 130.992718 | 1.22657 |
| Phosphoenolpyruvate-protein phosphotransferase of PTS system (EC 2.7.3.9)                            | 3189 | 966138  | 967877  | 148.9361702 | 185.13686  | 1.24306 |
| GTP-binding protein EngA                                                                             | 3188 | 967886  | 969463  | 128.725428  | 171.112873 | 1.32929 |
| Transcriptional regulator, MerR family                                                               | 3187 | 969465  | 969806  | 41.05571848 | 43.659824  | 1.06343 |
| Methyltransferase (EC 2.1.1.-)                                                                       | 3186 | 969806  | 971065  | 42.89118348 | 81.2986497 | 1.89546 |
| Zinc ABC transporter, inner membrane permease protein ZnuB                                           | 3185 | 971269  | 972114  | 40.23668639 | 36.3390533 | 0.90313 |
| Zinc ABC transporter, ATP-binding protein ZnuC                                                       | 3184 | 972111  | 972980  | 50.63291139 | 54.6093211 | 1.07853 |
| Zinc ABC transporter, periplasmic-binding protein ZnuA                                               | 3183 | 972977  | 973954  | 29.68270215 | 40.0010235 | 1.34762 |
| hypothetical protein                                                                                 | 3182 | 973956  | 975326  | 53.28467153 | 29.8846715 | 0.56085 |
| 2-haloalkanoic acid dehalogenase (EC 3.8.1.2)                                                        |      | 975378  | 976331  | 16.78908709 | 21.4805876 | 1.27944 |
| hypothetical protein                                                                                 | 3180 | 976328  | 977761  | 65.59665038 | 53.8949756 | 0.82161 |
| hypothetical protein                                                                                 | 3179 | 977925  | 978812  | 104.8478016 | 75.5310034 | 0.72039 |
| Ribonucleotide reductase of class II (coenzyme B12-dependent) (EC 1.17.4.1)                          | 3178 | 978989  | 982519  | 73.25383305 | 98.8094832 | 1.34886 |
| Probable glycolate oxidase                                                                           | 3177 | 982628  | 983527  | 57.84204672 | 57.9621802 | 1.00208 |
| S-ribosylhomocysteine lyase (EC 4.4.1.21) / Autoinducer-2 production protein LuxS                    | 3176 | 983547  | 984023  | 302.5210084 | 351.869748 | 1.16313 |
| Flagellar hook-length control protein fliK                                                           | 3175 | 984247  | 986280  | 36.39940974 | 31.1234629 | 0.85505 |
| putative autotransporter protein                                                                     | 3174 | 986255  | 989479  | 66.99751861 | 44.4469603 | 0.66341 |
| hypothetical protein                                                                                 | 3173 | 989493  | 990779  | 35.76982893 | 28.9424572 | 0.80913 |
| Geobacter sulfurreducens, CxxxxCH...CXXCH motif                                                      | 3172 | 990978  | 992747  | 55.39853024 | 56.2823629 | 1.01595 |
| putative autotransporter protein                                                                     | 3171 | 992760  | 996047  | 44.11317311 | 38.2164588 | 0.86633 |
| hypothetical protein                                                                                 | 3170 | 996041  | 997330  | 24.82544608 | 26.7094647 | 1.07589 |
| Cell surface protein                                                                                 | 3169 | 997339  | 999288  | 29.24576706 | 34.8519754 | 1.19169 |
| Calcium-binding acidic-repeat protein precursor                                                      | 3168 | 999290  | 1000927 | 26.87843616 | 27.852474  | 1.03624 |
| hypothetical protein                                                                                 | 3167 | 1000976 | 1001629 | 24.50229709 | 32.7741194 | 1.33759 |
| 5'-methylthioadenosine nucleosidase (EC 3.2.2.16) / S-adenosylhomocysteine nucleosidase (EC 3.2.2.9) | 3166 | 1001629 | 1002339 | 97.18309859 | 94.3605634 | 0.97096 |
| Sensor histidine kinase (EC 2.7.3.-)                                                                 | 3165 | 1002451 | 1003638 | 13.47935973 | 13.3264532 | 0.98866 |
| Transcriptional regulatory protein UhpA                                                              | 3164 | 1003661 | 1004272 | 22.91325696 | 22.8436989 | 0.99696 |
| GGDEF domain protein                                                                                 | 3163 | 1004309 | 1005436 | 303.4605146 | 269.159716 | 0.88697 |

|                                                                                            |      |         |         |             |            |         |
|--------------------------------------------------------------------------------------------|------|---------|---------|-------------|------------|---------|
| hypothetical protein                                                                       | 3162 | 1005436 | 1005903 | 280.5139186 | 326.770878 | 1.1649  |
| Predicted endonuclease distantly related to archaeal Holliday junction resolvase           | 3161 | 1006081 | 1006437 | 174.1573034 | 141.143258 | 0.81044 |
| HD domain protein                                                                          | 3160 | 1006427 | 1007758 | 186.696901  | 162.468254 | 0.87022 |
| Uncharacterized homolog of the cytoplasmic domain of flagellar protein FhIB                | 3159 | 1007755 | 1008000 | 351.0204082 | 300.038776 | 0.85476 |
| hypothetical protein                                                                       |      | 1008005 | 1009033 | 123.540856  | 164.738327 | 1.33347 |
| LSU ribosomal protein L19p                                                                 | 3157 | 1009061 | 1009480 | 553.699284  | 595.164678 | 1.07489 |
| tRNA (Guanine37-N1) -methyltransferase (EC 2.1.1.31)                                       | 3156 | 1009458 | 1010282 | 319.1747573 | 281.182646 | 0.88097 |
| 16S rRNA processing protein RimM                                                           | 3155 | 1010291 | 1010797 | 664.0316206 | 555.357708 | 0.83634 |
| hypothetical protein                                                                       | 3154 | 1010854 | 1011087 | 1557.939914 | 1673.30258 | 1.07405 |
| SSU ribosomal protein S16p                                                                 | 3153 | 1011112 | 1011360 | 1262.096774 | 1384.49395 | 1.09698 |
| T. pallidum predicted coding region TP0123                                                 | 3152 | 1011586 | 1014447 | 38.44809507 | 35.7759525 | 0.9305  |
|                                                                                            |      |         |         |             |            |         |
| sensory box histidine kinase/response regulator                                            | 3151 | 1014467 | 1017499 | 14.84168865 | 13.8101913 | 0.9305  |
| hypothetical protein                                                                       | 3150 | 1017536 | 1017745 | 19.13875598 | 44.5215311 | 2.32625 |
| PIN domain protein                                                                         | 3149 | 1017738 | 1018166 | 35.04672897 | 28.2628505 | 0.80643 |
| hypothetical protein                                                                       | 3148 | 1018169 | 1018426 | 23.3463035  | 18.1031128 | 0.77542 |
| Ornithine decarboxylase (EC 4.1.1.17) / Arginine decarboxylase (EC 4.1.1.19)               | 3147 | 1018648 | 1019817 | 57.4912892  | 125.633711 | 2.18527 |
| Transcriptional regulator                                                                  | 3146 | 1020000 | 1020572 | 3.496503497 | 1.62674825 | 0.46525 |
| hypothetical protein                                                                       | 3145 | 1020741 | 1021403 | 3.021148036 | 2.81117825 | 0.9305  |
| hypothetical protein                                                                       | 3144 | 1021425 | 1021751 | 3.067484663 | 5.70858896 | 1.861   |
| hypothetical protein                                                                       | 3143 | 1021805 | 1023097 | 68.11145511 | 59.7767028 | 0.87763 |
| hypothetical protein                                                                       | 3142 | 1023194 | 1023988 | 2.518891688 | 8.2034005  | 3.25675 |
| Uncharacterized protein TP_0584                                                            | 3141 | 1024030 | 1025469 | 97.28978457 | 128.032662 | 1.31599 |
| hypothetical protein                                                                       | 3140 | 1025668 | 1025805 | 109.4890511 | 135.839416 | 1.24067 |
|                                                                                            |      |         |         |             |            |         |
| Oligopeptide ABC transporter, periplasmic oligopeptide-binding protein oppA (TC 3.A.1.5.1) | 3139 | 1025892 | 1027451 | 142.3989737 | 216.062219 | 1.5173  |
| Cell division protein                                                                      | 3138 | 1027529 | 1028272 | 410.4979812 | 862.872813 | 2.10201 |
| Dephospho-CoA kinase (EC 2.7.1.24)                                                         | 3137 | 1028278 | 1028919 | 308.8923557 | 124.840874 | 0.40416 |
| Macrolide-efflux protein                                                                   | 3136 | 1028895 | 1030271 | 7.994186047 | 9.46729651 | 1.18427 |
| N-acetyltransferase                                                                        | 3135 | 1030347 | 1031228 | 36.32236095 | 35.9103292 | 0.98866 |
| Flagellar motor switch protein fliM                                                        | 3134 | 1031239 | 1032267 | 224.609375  | 245.34668  | 1.09233 |
| Dihydrofolate synthase (EC 6.3.2.12) / Folylpolyglutamate synthase (EC 6.3.2.17)           | 3133 | 1032458 | 1033861 | 363.5067712 | 287.174982 | 0.79001 |
| CO dehydrogenase accessory protein CooC (nickel insertion)                                 | 3132 | 1034497 | 1035270 | 344.1138422 | 329.827943 | 0.95848 |
| Core component Fbp of predicted folate ECF transporter                                     | 3131 | 1035431 | 1035985 | 277.9783394 | 241.862816 | 0.87008 |
| ATPase component of general energizing module of ECF transporters                          | 3130 | 1035988 | 1036815 | 263.6033857 | 252.033857 | 0.95611 |
| Transmembrane component of general energizing module of ECF transporters                   | 3129 | 1036812 | 1037375 | 74.60035524 | 42.9715808 | 0.57602 |
| hypothetical protein                                                                       | 3128 | 1037378 | 1037512 | 0           | 0          | #DIV/0! |
| 5,10-methylenetetrahydrofolate reductase (EC 1.7.99.5)                                     | 3127 | 1037563 | 1038507 | 2266.949153 | 2625.90254 | 1.15834 |
| Formate--tetrahydrofolate ligase (EC 6.3.4.3)                                              | 3126 | 1038588 | 1040321 | 1463.358338 | 1599.515   | 1.09304 |
| Formiminotetrahydrofolate cyclodeaminase (EC 4.3.1.4)                                      | 3125 | 1040390 | 1041019 | 424.4833068 | 593.212242 | 1.39749 |



|                                                                                                                     |      |         |         |             |            |         |
|---------------------------------------------------------------------------------------------------------------------|------|---------|---------|-------------|------------|---------|
| Methylenetetrahydrofolate dehydrogenase (NADP+) (EC 1.5.1.5) / Methenyltetrahydrofolate cyclohydrolase (EC 3.5.4.9) | 3124 | 1041088 | 1041939 | 708.5781434 | 884.576381 | 1.24838 |
| hypothetical protein                                                                                                | 3123 | 1041979 | 1043199 | 36.06557377 | 38.1352459 | 1.05739 |
| Periplasmic [Fe] hydrogenase (EC 1.12.7.2)                                                                          | 3122 | 1043196 | 1044947 | 114.2204455 | 92.9968589 | 0.81419 |
| hypothetical protein                                                                                                |      | 1045419 | 1045787 | 13.58695652 | 12.642663  | 0.9305  |
| hypothetical protein                                                                                                |      | 1046234 | 1046398 | 18.29268293 | 17.0213415 | 0.9305  |
| hypothetical protein                                                                                                | 3119 | 1046437 | 1046784 | 5.763688761 | 5.36311239 | 0.9305  |
| Putative cytoplasmic protein                                                                                        | 3118 | 1046844 | 1047842 | 21.04208417 | 8.39128257 | 0.39879 |
| hypothetical protein                                                                                                |      | 1047876 | 1048004 | 7.8125      | 7.26953125 | 0.9305  |
| ATPase involved in DNA repair                                                                                       | 3116 | 1048068 | 1050731 | 4.881712354 | 2.44592565 | 0.50104 |
| Helicase domain protein                                                                                             | 3115 | 1050775 | 1055754 | 17.07170114 | 17.5671822 | 1.02902 |
| hypothetical protein                                                                                                | 3114 | 1055751 | 1056779 | 3.891050584 | 0.90515564 | 0.23263 |
| hypothetical protein                                                                                                | 3113 | 1056792 | 1057016 | 102.6785714 | 108.004464 | 1.05187 |
| probable transcription regulator NMA0738                                                                            | 3112 | 1057047 | 1057670 | 15.10067114 | 23.4186242 | 1.55083 |
| hypothetical protein                                                                                                | 3111 | 1057807 | 1058655 | 7.075471698 | 5.48643868 | 0.77542 |
| protein T24A6.7                                                                                                     | 3110 | 1058664 | 1059272 | 1.644736842 | 1.53042763 | 0.9305  |
| hypothetical protein                                                                                                | 3109 | 1059415 | 1060005 | 8.474576271 | 1.57711864 | 0.1861  |
| hypothetical protein                                                                                                | 3108 | 1060040 | 1060219 | 11.17318436 | 10.396648  | 0.9305  |
| hypothetical protein                                                                                                | 3107 | 1060200 | 1060973 | 0           | 1.20375162 | #DIV/0! |
| hypothetical protein                                                                                                | 3106 | 1061036 | 1061209 | 0           | 0          | #DIV/0! |
| hypothetical protein                                                                                                | 3105 | 1061274 | 1061597 | 3.095975232 | 0          | 0       |
| hypothetical protein                                                                                                | 3104 | 1061625 | 1062425 | 15          | 9.305      | 0.62033 |
| hypothetical protein                                                                                                | 3103 | 1062643 | 1062906 | 114.0684411 | 77.8365019 | 0.68237 |
| Molybdopterin biosynthesis protein A                                                                                | 3102 | 1062984 | 1064204 | 136.0655738 | 128.897131 | 0.94732 |
| hypothetical protein                                                                                                | 3101 | 1064278 | 1064919 | 110.7644306 | 84.1950078 | 0.76013 |
| hypothetical protein                                                                                                |      | 1064976 | 1065104 | 31.25       | 0          | 0       |
| Formate dehydrogenase H (EC 1.2.1.2); selenocysteine-containing                                                     | 3099 | 1065082 | 1067280 | 601.455869  | 33.4438126 | 0.0556  |
| Electron transport protein hydN                                                                                     | 3098 | 1067277 | 1067795 | 1100.3861   | 59.2789575 | 0.05387 |
| Formate dehydrogenase chain D (EC 1.2.1.2)                                                                          | 3097 | 1067822 | 1068559 | 398.9145183 | 21.463365  | 0.0538  |
| hypothetical protein                                                                                                | 3096 | 1068556 | 1068936 | 286.8421053 | 7.34605263 | 0.02561 |
| Fe-S-cluster-containing hydrogenase components 2                                                                    | 3095 | 1068951 | 1069496 | 552.293578  | 39.2688073 | 0.0711  |
| Periplasmic [Fe] hydrogenase large subunit (EC 1.12.7.2)                                                            | 3094 | 1069499 | 1070863 | 494.8680352 | 31.3804985 | 0.06341 |
| Formate dehydrogenase chain D (EC 1.2.1.2)                                                                          | 3093 | 1070856 | 1071467 | 62.19312602 | 1.52291326 | 0.02449 |
| hypothetical protein                                                                                                | 3092 | 1071468 | 1071587 | 16.80672269 | 7.81932773 | 0.46525 |
| Benzoyl-CoA reductase subunit BadG (EC 1.3.99.15)                                                                   | 3091 | 1071559 | 1072356 | 10.03764115 | 12.8425345 | 1.27944 |
| hypothetical protein                                                                                                | 3090 | 1072357 | 1073511 | 25.9965338  | 31.4467071 | 1.20965 |
| ABC-type polar amino acid transport system, ATPase component                                                        | 3089 | 1073537 | 1074343 | 18.61042184 | 19.6259305 | 1.05457 |
| Amino acid ABC transporter, periplasmic amino acid-binding portion                                                  | 3088 | 1074423 | 1075232 | 65.51297899 | 108.117429 | 1.65032 |
| Probable amino-acid ABC transporter, permease protein precursor                                                     | 3087 | 1075306 | 1075971 | 1.503759398 | 6.9962406  | 4.6525  |
| hypothetical protein                                                                                                | 3086 | 1075961 | 1076152 | 20.94240838 | 29.2303665 | 1.39575 |
| hypothetical protein                                                                                                | 3085 | 1076276 | 1076404 | 0           | 0          | #DIV/0! |
| L-seryl-tRNA(Sec) selenium transferase (EC 2.9.1.1)                                                                 | 3084 | 1076415 | 1077893 | 54.12719892 | 95.0646143 | 1.75632 |

|                                                                                  |      |         |         |             |            |         |
|----------------------------------------------------------------------------------|------|---------|---------|-------------|------------|---------|
| Selenocysteine-specific translation elongation factor                            | 3083 | 1077895 | 1079853 | 66.90500511 | 84.5909091 | 1.26434 |
| Cysteine desulfurase (EC 2.8.1.7)                                                | 3082 | 1079907 | 1081100 | 79.63118189 | 107.635373 | 1.35167 |
| Hypothetical protein Cj1505c                                                     | 3081 | 1081108 | 1081731 | 181.3804173 | 165.787319 | 0.91403 |
| Selenide,water dikinase (EC 2.7.9.3); selenocysteine-containing                  | 3080 | 1081754 | 1082806 | 116.9201521 | 99.0646388 | 0.84728 |
| hypothetical protein                                                             | 3079 | 1082790 | 1083086 | 104.7297297 | 106.881757 | 1.02055 |
| hypothetical protein                                                             | 3077 | 1083258 | 1083428 | 5.882352941 | 5.47352941 | 0.9305  |
| Predicted hydroxymethylpyrimidine transporter CytX                               | 3076 | 1083473 | 1084651 | 2.546689304 | 2.3696944  | 0.9305  |
| incorrect stop                                                                   |      | 1084851 | 1085285 | 1087.557604 | 1072.00461 | 0.9857  |
| Formate dehydrogenase H (EC 1.2.1.2); selenocysteine-containing                  |      | 1085334 | 1087043 | 167.9344646 | 331.038034 | 1.97123 |
| MoxR-like ATPases                                                                | 3073 | 1087167 | 1088594 | 118.4302733 | 134.325858 | 1.13422 |
| hypothetical protein                                                             | 3072 | 1088597 | 1090063 | 23.8744884  | 31.101296  | 1.3027  |
| probable electron transfer protein                                               | 3071 | 1090109 | 1092052 | 509.5213587 | 450.164694 | 0.88351 |
| hypothetical protein                                                             | 3070 | 1092045 | 1092740 | 323.7410072 | 249.025899 | 0.76921 |
| Carbon monoxide dehydrogenase CooS subunit (EC 1.2.99.2)                         | 3069 | 1092873 | 1094768 | 2697.62533  | 2523.88918 | 0.9356  |
| CO dehydrogenase accessory protein CooC (nickel insertion)                       | 3068 | 1094768 | 1095541 | 1878.39586  | 1479.41074 | 0.78759 |
| CO dehydrogenase/acetyl-CoA synthase, acetyl-CoA synthase subunit (EC 2.3.1.169) | 3067 | 1095614 | 1097758 | 1811.567164 | 1908.3062  | 1.0534  |
| Acetyl-CoA synthase corrinoid iron-sulfur protein, small subunit                 | 3066 | 1097840 | 1098784 | 1330.508475 | 1265.63771 | 0.95124 |
| Acetyl-CoA synthase corrinoid iron-sulfur protein, large subunit                 | 3065 | 1098797 | 1100128 | 1616.078137 | 1982.64313 | 1.22682 |
| 5-methyltetrahydrofolate:corrinoid iron-sulfur protein methyltransferase         | 3064 | 1100195 | 1100980 | 2183.43949  | 2269.94586 | 1.03962 |
| hypothetical protein                                                             | 3063 | 1100987 | 1101289 | 5605.960265 | 6479.60762 | 1.15584 |
| hypothetical protein                                                             | 3062 | 1101356 | 1101526 | 3876.470588 | 4313.14118 | 1.11265 |
| hypothetical protein                                                             | 3061 | 1101526 | 1101981 | 3305.494505 | 3315.03407 | 1.00289 |
| DNA polymerase I (EC 2.7.7.7)                                                    | 3060 | 1102079 | 1105090 | 113.2514115 | 147.099967 | 1.29888 |
| Methyl-accepting chemotaxis sensory transducer precursor                         | 3059 | 1105178 | 1106998 | 351.0989011 | 382.425275 | 1.08922 |
| HD_GYP hydrolase domain fused to HD hydrolase domain                             | 3058 | 1107002 | 1108237 | 109.3117409 | 133.359109 | 1.21999 |
| Sensory box histidine kinase/response regulator                                  | 3057 | 1108290 | 1110563 | 104.7535211 | 123.684419 | 1.18072 |
| Response regulator                                                               | 3056 | 1110645 | 1111250 | 171.9008264 | 141.497521 | 0.82313 |
| Na <sup>+</sup> /H <sup>+</sup> antiporter NhaD type                             | 3055 | 1111311 | 1112606 | 74.9034749  | 86.942471  | 1.16073 |
| 8-amino-7-oxononanoate synthase (EC 2.3.1.47)                                    | 3054 | 1112637 | 1113812 | 36.59574468 | 43.5553191 | 1.19017 |
| Pimeloyl-CoA synthase (EC 6.2.1.14)                                              | 3053 | 1113817 | 1114575 | 26.38522427 | 22.0963061 | 0.83745 |
| Adenosylmethionine-8-amino-7-oxononanoate aminotransferase (EC 2.6.1.62)         | 3052 | 1114611 | 1115960 | 80.05930319 | 61.3895478 | 0.7668  |
| Dethiobiotin synthetase (EC 6.3.3.3)                                             | 3051 | 1115970 | 1116668 | 83.09455587 | 87.9842407 | 1.05884 |
| Phosphoenolpyruvate carboxykinase [GTP] (EC 4.1.1.32)                            | 3050 | 1116736 | 1118556 | 867.9141442 | 1131.24629 | 1.30341 |
| hypothetical protein                                                             | 3048 | 1118717 | 1119067 | 151.4285714 | 135.587143 | 0.89539 |
| Uncharacterized protein TP_0700                                                  | 3049 | 1119064 | 1119453 | 236.503856  | 394.68509  | 1.66883 |
| hypothetical protein                                                             |      | 1119705 | 1119839 | 29.85074627 | 20.8320896 | 0.69788 |



|                                                                                                            |      |         |         |             |            |         |
|------------------------------------------------------------------------------------------------------------|------|---------|---------|-------------|------------|---------|
| Large exoproteins involved in heme utilization or adhesion                                                 | 3046 | 1119838 | 1121661 | 29.62150302 | 16.8439386 | 0.56864 |
| lipoprotein, putative                                                                                      | 3045 | 1121715 | 1122986 | 40.12588513 | 47.586546  | 1.18593 |
| hypothetical protein                                                                                       | 3044 | 1123007 | 1123486 | 93.94572025 | 110.727557 | 1.17863 |
| GTP-binding protein Era                                                                                    | 3043 | 1123528 | 1124454 | 62.6349892  | 89.4325054 | 1.42784 |
| Homoserine kinase (EC 2.7.1.39)                                                                            | 3042 | 1124467 | 1125084 | 189.6272285 | 190.02107  | 1.00208 |
| Biotin-protein ligase (EC 6.3.4.15) / Biotin operon repressor                                              | 3041 | 1125652 | 1126407 | 22.51655629 | 23.4165563 | 1.03997 |
| hypothetical protein                                                                                       | 3040 | 1126444 | 1127265 | 114.4945189 | 133.738124 | 1.16807 |
| Phosphoesterase family protein                                                                             | 3039 | 1127269 | 1128135 | 94.68822171 | 138.607968 | 1.46384 |
| Cellobiose phosphotransferase system YdjC-like protein                                                     | 3038 | 1128278 | 1129039 | 55.19053876 | 52.5775296 | 0.95265 |
| Ferric iron ABC transporter, permease protein                                                              | 3037 | 1129052 | 1130677 | 153.2307692 | 173.502462 | 1.1323  |
| Ferric iron ABC transporter, ATP-binding protein # pitD                                                    | 3036 | 1130700 | 1131797 | 290.793072  | 268.038286 | 0.92175 |
| Ferric iron ABC transporter, iron-binding protein                                                          | 3035 | 1131825 | 1132892 | 672.9147142 | 457.837395 | 0.68038 |
| B. burgdorferi predicted coding region BB0351                                                              | 3034 | 1132993 | 1134429 | 38.99721448 | 40.1747911 | 1.0302  |
| hypothetical protein                                                                                       | 3033 | 1134458 | 1134580 | 98.36065574 | 22.8811475 | 0.23263 |
| Hydrolase (HAD superfamily)                                                                                | 3032 | 1134598 | 1136127 | 903.7037037 | 973.735354 | 1.07749 |
| Oligopeptide transport ATP-binding protein oppF (TC 3.A.1.5.1)                                             | 3031 | 1136241 | 1137221 | 17.34693878 | 14.2423469 | 0.82103 |
| Oligopeptide transport ATP-binding protein oppD (TC 3.A.1.5.1)                                             | 3030 | 1137214 | 1138248 | 4.835589942 | 4.49951644 | 0.9305  |
| Dipeptide transport system permease protein dppC (TC 3.A.1.5.2)                                            | 3029 | 1138258 | 1139169 | 3.293084523 | 2.0428101  | 0.62033 |
| Dipeptide transport system permease protein dppB (TC 3.A.1.5.2)                                            | 3028 | 1139162 | 1140133 | 5.149330587 | 4.79145211 | 0.9305  |
| Dipeptide-binding ABC transporter, periplasmic substrate-binding component (TC 3.A.1.5.2)                  | 3027 | 1140245 | 1141867 | 12.33045623 | 13.7681874 | 1.1166  |
| Dipeptide-binding ABC transporter, periplasmic substrate-binding component (TC 3.A.1.5.2)                  | 3026 | 1142182 | 1143798 | 3.712871287 | 8.63706683 | 2.32625 |
| hypothetical protein                                                                                       | 3025 | 1143947 | 1144315 | 2.717391304 | 7.58559783 | 2.7915  |
| hypothetical protein                                                                                       | 3024 | 1144343 | 1144708 | 16.43835616 | 7.64794521 | 0.46525 |
| Hypothetical oxidoreductase ydjG (EC 1.-.-.-) aminopeptidase                                               | 3023 | 1144721 | 1145719 | 11.02204409 | 15.8502004 | 1.43805 |
| Acetylnithine deacetylase/Succinyl-diaminopimelate desuccinylase and related deacylases                    | 3022 | 1145745 | 1146857 | 4.496402878 | 10.8781475 | 2.4193  |
| Uroporphyrinogen III decarboxylase (EC 4.1.1.37)                                                           | 3020 | 1146850 | 1148304 | 6.877579092 | 7.67950481 | 1.1166  |
| hypothetical protein                                                                                       | 3019 | 1148398 | 1149444 | 19.12045889 | 24.9082218 | 1.3027  |
|                                                                                                            |      | 1149448 | 1149540 | 0           | 0          | #DIV/0! |
| Multi antimicrobial extrusion protein (Na <sup>+</sup> )/drug antiporter), MATE family of MDR efflux pumps | 3018 | 1149482 | 1150870 | 42.50720461 | 52.2903458 | 1.23015 |
| Lipopolysaccharide ABC transporter, ATP-binding protein LptB                                               | 3017 | 1150878 | 1151633 | 160.2649007 | 157.753642 | 0.98433 |
| hypothetical protein                                                                                       | 3016 | 1151637 | 1152305 | 92.81437126 | 83.5778443 | 0.90048 |
| hypothetical protein                                                                                       | 3015 | 1152296 | 1153033 | 206.2415197 | 162.869064 | 0.7897  |
| CTP synthase (EC 6.3.4.2)                                                                                  | 3014 | 1153057 | 1154685 | 402.4767802 | 339.358824 | 0.84318 |
| Chemotaxis protein methyltransferase CheR (EC 2.1.1.80)                                                    | 3013 | 1154856 | 1155677 | 308.1607795 | 228.941535 | 0.74293 |

|                                                                                                            |      |         |         |             |            |         |
|------------------------------------------------------------------------------------------------------------|------|---------|---------|-------------|------------|---------|
| Chemotaxis response regulator protein-glutamate methyltransferase CheB (EC 3.1.1.61)                       | 3012 | 1155709 | 1156863 | 396.0138648 | 404.775563 | 1.02212 |
| Ubiquinone/menaquinone biosynthesis methyltransferase UbiE/COQ5 (EC 2.1.1.-)                               | 3011 | 1156939 | 1157682 | 145.3566622 | 122.730821 | 0.84434 |
| Signal peptidase-like protein                                                                              | 3010 | 1157725 | 1158669 | 139.0658174 | 143.22983  | 1.02994 |
| UDP-N-acetylenolpyruvoylglucosamine reductase (EC 1.1.1.158)                                               | 3009 | 1158734 | 1159288 | 83.03249097 | 119.251805 | 1.43621 |
| hypothetical protein                                                                                       | 3008 | 1159281 | 1159739 | 362.4454148 | 316.938865 | 0.87445 |
| Membrane proteins related to metalloendopeptidases                                                         | 3007 | 1159770 | 1160810 | 328.8461538 | 380.252404 | 1.15632 |
| Ribose ABC transport system, periplasmic ribose-binding protein RbsB (TC 3.A.1.2.1)                        | 3006 | 1161064 | 1162014 | 129.4736842 | 74.44      | 0.57494 |
| two-component sensor histidine kinase                                                                      | 3005 | 1162011 | 1163552 | 36.34003894 | 26.568462  | 0.73111 |
| DNA-binding response regulator                                                                             | 3004 | 1163545 | 1165044 | 48.69913276 | 33.5203469 | 0.68832 |
| Xylose ABC transporter, periplasmic xylose-binding protein xylF                                            | 3003 | 1165025 | 1166143 | 56.35062612 | 54.0988372 | 0.96004 |
| hypothetical protein                                                                                       | 3002 | 1166109 | 1166252 | 6.993006993 | 0          | 0       |
| L-arabinose-binding periplasmic protein precursor araF (TC 3.A.1.2.2)                                      | 3001 | 1166292 | 1167440 | 669.452182  | 4007.11142 | 5.98566 |
| L-arabinose transport ATP-binding protein araG (TC 3.A.1.2.2)                                              | 3000 | 1167547 | 1169073 | 105.3704963 | 333.360639 | 3.1637  |
| L-arabinose transport system permease protein (TC 3.A.1.2.2)                                               | 2999 | 1169115 | 1170308 | 52.40549828 | 199.050258 | 3.79827 |
| Methylcobalamin:coenzyme M methyltransferase, methylamine-specific                                         | 2998 | 1170460 | 1171461 | 37.96203796 | 183.125375 | 4.82391 |
| Translation elongation factor G, mitochondrial                                                             | 2997 | 1171653 | 1173746 | 507.0014486 | 1003.28658 | 1.97886 |
| hypothetical protein                                                                                       | 2996 | 1173752 | 1174453 | 333.8088445 | 473.878031 | 1.41961 |
| High-affinity carbon uptake protein Hat/HatR                                                               | 2995 | 1174476 | 1177706 | 44.58204334 | 67.4108359 | 1.51206 |
| Nitroreductase family protein                                                                              | 2994 | 1177721 | 1178242 | 67.17850288 | 114.303263 | 1.70149 |
| putative oxidoreductase                                                                                    | 2993 | 1178303 | 1179277 | 54.41478439 | 49.6776181 | 0.91294 |
| 2-dehydro-3-deoxygluconate kinase (EC 2.7.1.45)                                                            | 2992 | 1179312 | 1180415 | 15.41251133 | 11.8105168 | 0.76629 |
| 4-Hydroxy-2-oxoglutarate aldolase (EC 4.1.3.16) / 2-dehydro-3-deoxyphosphogluconate aldolase (EC 4.1.2.14) | 2991 | 1180412 | 1181077 | 6.015037594 | 15.3917293 | 2.55888 |
| Transcriptional regulator KdgR, KDG operon repressor                                                       | 2990 | 1181197 | 1182015 | 39.1198044  | 30.7133252 | 0.78511 |
| alpha-arabinosides ABC transport system, substrate-binding protein araN                                    | 2989 | 1182140 | 1183444 | 52.14723926 | 50.663727  | 0.97155 |
| sugar ABC transporter, permease protein                                                                    | 2988 | 1183467 | 1184345 | 15.9453303  | 13.7773349 | 0.86404 |
| ABC transporter sugar permease                                                                             | 2987 | 1184348 | 1185193 | 7.100591716 | 5.50591716 | 0.77542 |
| Beta-galactosidase (EC 3.2.1.23)                                                                           | 2986 | 1185213 | 1187570 | 15.27365295 | 5.92172253 | 0.38771 |
| Gluconate dehydratase (EC 4.2.1.39)                                                                        | 2985 | 1187608 | 1188756 | 11.32404181 | 16.2108014 | 1.43154 |
| Cold-shock DEAD-box protein A                                                                              | 2984 | 1188760 | 1190628 | 177.7301927 | 183.310493 | 1.0314  |
| Regulatory protein recX                                                                                    | 2983 | 1190913 | 1191554 | 138.8455538 | 227.907176 | 1.64144 |
| SSU ribosomal protein S9p (S16e)                                                                           | 2982 | 1191596 | 1191988 | 471.9387755 | 434.391582 | 0.92044 |
| LSU ribosomal protein L13p (L13Ae)                                                                         | 2981 | 1192060 | 1192488 | 640.1869159 | 850.059579 | 1.32783 |
| hypothetical protein                                                                                       | 2980 | 1192572 | 1192793 | 149.321267  | 168.41629  | 1.12788 |
| hypothetical protein                                                                                       | 2979 | 1192809 | 1193108 | 56.85618729 | 71.5769231 | 1.25891 |
| Methyl-accepting chemotaxis protein                                                                        | 2978 | 1193430 | 1195610 | 46.78899083 | 67.8667431 | 1.45049 |

|                                                                                                                                                                                                     |      |         |         |             |            |         |
|-----------------------------------------------------------------------------------------------------------------------------------------------------------------------------------------------------|------|---------|---------|-------------|------------|---------|
| Aspartate-semialdehyde dehydrogenase (EC 1.2.1.11)                                                                                                                                                  | 2977 | 1195629 | 1196744 | 425.1121076 | 549.954709 | 1.29367 |
| Dihydrodipicolinate synthase (EC 4.2.1.52)                                                                                                                                                          | 2976 | 1196826 | 1197758 | 245.7081545 | 282.544528 | 1.14992 |
| Dihydrodipicolinate reductase (EC 1.3.1.26)                                                                                                                                                         | 2975 | 1197837 | 1198646 | 88.99876391 | 92.0148331 | 1.03389 |
| Aspartokinase (EC 2.7.2.4)                                                                                                                                                                          | 2974 | 1198643 | 1199998 | 175.1662971 | 245.519956 | 1.40164 |
| Ribonuclease R (EC 3.1.-.-)                                                                                                                                                                         | 2973 | 1200139 | 1202064 | 96.62337662 | 110.20987  | 1.14061 |
| Chemotaxis protein CheA (EC 2.7.3.-)                                                                                                                                                                | 2972 | 1202140 | 1204503 | 927.1495129 | 794.137018 | 0.85654 |
| Positive regulator of CheA protein activity (CheW)                                                                                                                                                  | 2971 | 1204529 | 1205875 | 945.7652303 | 819.890788 | 0.86691 |
| Chemotaxis protein CheX                                                                                                                                                                             | 2970 | 1205900 | 1206370 | 1184.444444 | 1139.34556 | 0.96192 |
| PTS system, mannitol-specific IIC component (EC 2.7.1.69) / PTS system, mannitol-specific IIB component (EC 2.7.1.69) / PTS system, mannitol-specific IIA component (EC 2.7.1.69)                   | 2968 | 1206725 | 1208146 | 16.88951443 | 12.4415904 | 0.73665 |
| Phosphocarrier protein of PTS system                                                                                                                                                                | 2967 | 1208161 | 1208418 | 27.23735409 | 21.7237354 | 0.79757 |
| Mannitol operon activator, BglG family                                                                                                                                                              | 2966 | 1208433 | 1210466 | 12.29709788 | 3.20388588 | 0.26054 |
| PTS system, mannitol-specific IIA component (EC 2.7.1.69)                                                                                                                                           | 2965 | 1210476 | 1210916 | 18.18181818 | 16.9181818 | 0.9305  |
| 1-phosphofructokinase (EC 2.7.1.56)                                                                                                                                                                 | 2964 | 1210913 | 1211887 | 16.42710472 | 7.64271047 | 0.46525 |
| Putative oxidoreductase                                                                                                                                                                             | 2963 | 1212013 | 1213284 | 14.94885917 | 11.7136113 | 0.78358 |
| Phosphoenolpyruvate-protein phosphotransferase of PTS system (EC 2.7.3.9)                                                                                                                           | 2962 | 1213286 | 1214905 | 6.79431748  | 6.32211242 | 0.9305  |
| Endoribonuclease L-PSP                                                                                                                                                                              | 2961 | 1215000 | 1215377 | 47.74535809 | 108.599469 | 2.27456 |
| Putative lipoprotein                                                                                                                                                                                | 2960 | 1215492 | 1216304 | 35.71428571 | 36.6699507 | 1.02676 |
| Hcp transcriptional regulator HcpR (Crp/Fnr family)                                                                                                                                                 | 2959 | 1216373 | 1217041 | 17.96407186 | 36.2170659 | 2.01608 |
| Ferredoxin 3 fused to uncharacterized domain                                                                                                                                                        | 2958 | 1217045 | 1217839 | 21.41057935 | 26.9540302 | 1.25891 |
| Beta-glucoside bgl operon antiterminator, BglG family                                                                                                                                               | 2957 | 1218049 | 1218891 | 4.750593824 | 7.73574822 | 1.62838 |
| Cof-like hydrolase                                                                                                                                                                                  | 2956 | 1218888 | 1219772 | 6.787330317 | 5.26300905 | 0.77542 |
| Phosphoglycerate mutase family                                                                                                                                                                      | 2955 | 1219843 | 1220697 | 26.93208431 | 71.912178  | 2.67013 |
| PTS system, beta-glucoside-specific IIB component (EC 2.7.1.69) / PTS system, beta-glucoside-specific IIC component (EC 2.7.1.69) / PTS system, beta-glucoside-specific IIA component (EC 2.7.1.69) | 2954 | 1220773 | 1222725 | 17.93032787 | 35.751793  | 1.99393 |
| 5'-nucleotidase (EC 3.1.3.5)                                                                                                                                                                        | 2953 | 1222740 | 1224215 | 12.20338983 | 23.9722034 | 1.96439 |
| 6-phospho-beta-glucosidase (EC 3.2.1.86)                                                                                                                                                            | 2952 | 1224228 | 1225658 | 18.18181818 | 27.3293706 | 1.50312 |
| Phosphocarrier protein of PTS system                                                                                                                                                                | 2951 | 1225655 | 1225912 | 0           | 7.24124514 | #DIV/0! |
| Phosphoenolpyruvate-protein phosphotransferase of PTS system (EC 2.7.3.9)                                                                                                                           | 2950 | 1225921 | 1227543 | 16.64611591 | 26.3890259 | 1.5853  |
| Lead, cadmium, zinc and mercury transporting ATPase (EC 3.6.3.3) (EC 3.6.3.5); Copper-translocating P-type ATPase (EC 3.6.3.4)                                                                      | 2948 | 1227678 | 1229864 | 42.08600183 | 37.0327081 | 0.87993 |
| Transcriptional regulator, ArsR family                                                                                                                                                              | 2947 | 1229867 | 1230238 | 26.9541779  | 40.1293801 | 1.4888  |
| Sulfate permease                                                                                                                                                                                    | 2946 | 1230413 | 1232161 | 57.78032037 | 55.8938787 | 0.96735 |
| DNA repair helicase                                                                                                                                                                                 | 2945 | 1232258 | 1234057 | 174.5414119 | 205.858255 | 1.17942 |
| Uncharacterized protein TP_0021                                                                                                                                                                     | 2944 | 1234054 | 1236183 | 102.8651949 | 125.87318  | 1.22367 |
| Maebi                                                                                                                                                                                               | 2943 | 1236229 | 1237008 | 127.0860077 | 175.588575 | 1.38165 |
| hypothetical protein                                                                                                                                                                                |      | 1237088 | 1237201 | 0           | 0          | #DIV/0! |

|                                                                                                                                 |      |         |         |             |            |         |
|---------------------------------------------------------------------------------------------------------------------------------|------|---------|---------|-------------|------------|---------|
| methyl-accepting chemotaxis protein                                                                                             | 2941 | 1237122 | 1239356 | 2.697841727 | 1.67356115 | 0.62033 |
| Hydroxyacylglutathione hydrolase (EC 3.1.2.6)                                                                                   | 2940 | 1239494 | 1241134 | 1142.682927 | 1252.20335 | 1.09584 |
| hypothetical protein                                                                                                            |      | 1241152 | 1241340 | 21.27659574 | 9.89893617 | 0.46525 |
| hypothetical protein                                                                                                            | 2938 | 1241339 | 1242079 | 1029.72973  | 1124.14459 | 1.09169 |
| Crossover junction endodeoxyribonuclease ruvC (EC 3.1.22.4)                                                                     | 2937 | 1242066 | 1242746 | 116.1764706 | 142.311765 | 1.22496 |
| Positive regulator of CheA protein activity (CheW)                                                                              | 2936 | 1242819 | 1243292 | 473.5729387 | 322.625793 | 0.68126 |
| 4-keto-6-deoxy-N-Acetyl-D-hexosaminy-(Lipid carrier) aminotransferase                                                           | 2935 | 1243426 | 1244535 | 388.638413  | 367.501353 | 0.94561 |
| NAD kinase (EC 2.7.1.23)                                                                                                        | 2934 | 1244559 | 1245452 | 281.075028  | 269.87626  | 0.96016 |
| DNA repair protein RecN                                                                                                         | 2933 | 1245445 | 1247265 | 257.1428571 | 234.670055 | 0.91261 |
| hypothetical protein                                                                                                            | 2932 | 1247278 | 1248129 | 126.9095182 | 84.193302  | 0.66341 |
| Multidrug resistance ABC transporter ATP-binding and permease protein                                                           | 2931 | 1248095 | 1249918 | 66.92265496 | 49.5109709 | 0.73982 |
| Multidrug resistance ABC transporter ATP-binding and permease protein                                                           | 2930 | 1249911 | 1252067 | 32.93135436 | 35.8216605 | 1.08777 |
| hypothetical protein                                                                                                            | 2929 | 1252113 | 1252400 | 247.3867596 | 252.888502 | 1.02224 |
| Methyl-accepting chemotaxis protein                                                                                             | 2928 | 1252588 | 1254489 | 299.3161494 | 366.619937 | 1.22486 |
| Ankyrin repeat protein                                                                                                          | 2927 | 1254555 | 1257371 | 269.1761364 | 325.47674  | 1.20916 |
| TPR domain protein, putative component of TonB system                                                                           | 2926 | 1257438 | 1258904 | 65.48431105 | 57.1248295 | 0.87234 |
| hypothetical protein                                                                                                            | 2925 | 1259063 | 1259989 | 132.8293737 | 75.3644708 | 0.56738 |
| putative autotransporter protein                                                                                                | 2924 | 1260212 | 1262860 | 692.2205438 | 772.371224 | 1.11579 |
| hypothetical protein                                                                                                            | 2923 | 1263020 | 1263169 | 13.42281879 | 0          | 0       |
| Twin-arginine translocation protein TatB                                                                                        | 2921 | 1263257 | 1264312 | 132.7014218 | 140.236493 | 1.05678 |
| hypothetical protein                                                                                                            |      | 1264290 | 1264442 | 177.6315789 | 183.651316 | 1.03389 |
| Soluble lytic murein transglycosylase and related regulatory proteins (some contain LysM/invasin domains)                       | 2920 | 1264449 | 1266638 | 84.05664687 | 67.5877113 | 0.80407 |
| Cell division protein ftsK                                                                                                      | 2919 | 1266702 | 1268999 | 91.85894645 | 111.805834 | 1.21715 |
| hypothetical protein                                                                                                            |      | 1269041 | 1269172 | 30.53435115 | 0          | 0       |
| transposase                                                                                                                     | 2917 | 1269204 | 1270328 | 4.448398577 | 2.48354093 | 0.5583  |
| sensory box histidine kinase/response regulator                                                                                 | 2916 | 1270712 | 1273642 | 9.215017065 | 7.30426621 | 0.79265 |
| Oxidoreductase, aldo/keto reductase family                                                                                      |      | 1273692 | 1273829 | 51.09489051 | 54.3357664 | 1.06343 |
| hypothetical protein                                                                                                            |      | 1273826 | 1273963 | 51.09489051 | 54.3357664 | 1.06343 |
| Pantothenate kinase type II, eukaryotic (EC 2.7.1.33)                                                                           | 2913 | 1274121 | 1274939 | 145.0189155 | 83.3108449 | 0.57448 |
| Phosphinothricin N-acetyltransferase                                                                                            | 2912 | 1274940 | 1275449 | 82.51473477 | 40.2180747 | 0.4874  |
| spore peptidoglycan hydrolase (N-acetylglucosaminidase)                                                                         | 2911 | 1275949 | 1277013 | 40.41353383 | 31.4830827 | 0.77902 |
| Molybdenum ABC transporter, periplasmic molybdenum-binding protein modA (TC 3.A.1.8.1)                                          | 2910 | 1277113 | 1277934 | 92.57003654 | 104.270402 | 1.12639 |
| Molybdenum transport ATP-binding protein modC (TC 3.A.1.8.1) / Molybdenum transport system permease protein modB (TC 3.A.1.8.1) |      | 1277931 | 1278632 | 25.67760342 | 46.4586305 | 1.80931 |
| Molybdenum transport ATP-binding protein modC (TC 3.A.1.8.1) / Molybdenum transport system permease protein modB (TC 3.A.1.8.1) |      | 1278629 | 1279705 | 44.60966543 | 25.9433086 | 0.58156 |
| Molybdate-binding domain of ModE                                                                                                | 2906 | 1279737 | 1279949 | 400.9433962 | 320.408019 | 0.79914 |

|                                                                        |      |         |         |             |            |         |
|------------------------------------------------------------------------|------|---------|---------|-------------|------------|---------|
| unknown                                                                | 2907 | 1279946 | 1280503 | 113.1059246 | 150.35009  | 1.32929 |
| 5-methyltetrahydrofolate--homocysteine methyltransferase (EC 2.1.1.13) | 2905 | 1280623 | 1281249 | 31.94888179 | 13.3777955 | 0.41873 |
| hypothetical protein                                                   | 2904 | 1281601 | 1282521 | 110.8695652 | 81.9244565 | 0.73893 |
| sensory box histidine kinase/response regulator                        | 2903 | 1282588 | 1285014 | 114.0967342 | 127.708144 | 1.1193  |
| hypothetical protein                                                   | 2902 | 1285251 | 1285487 | 300.8474576 | 287.824153 | 0.95671 |
| hypothetical protein                                                   | 2901 | 1285513 | 1285755 | 148.7603306 | 84.5909091 | 0.56864 |
| Corrinoid methyltransferase protein                                    | 2900 | 1285918 | 1286541 | 9.63081862  | 2.98715891 | 0.31017 |
| Uroporphyrinogen-III decarboxylase                                     | 2899 | 1286538 | 1287659 | 5.352363961 | 4.15031222 | 0.77542 |
| 5-methyltetrahydrofolate--homocysteine methyltransferase (EC 2.1.1.13) | 2898 | 1287679 | 1288482 | 9.9626401   | 5.79389788 | 0.58156 |
| Major facilitator superfamily transporter-permease                     | 2897 | 1288572 | 1289750 | 6.791171477 | 3.15959253 | 0.46525 |
| COG0523: Putative GTPases (G3E family)                                 | 2896 | 1289840 | 1290850 | 13.86138614 | 6.4490099  | 0.46525 |
| hypothetical protein                                                   | 2895 | 1290863 | 1291525 | 7.552870091 | 1.40558912 | 0.1861  |
| hypothetical protein                                                   | 2894 | 1291594 | 1292154 | 80.35714286 | 61.4794643 | 0.76508 |
| Mo/Fe-nitrogenase-specific transcriptional regulator NifA              | 2893 | 1292159 | 1293784 | 5.538461538 | 4.00830769 | 0.72372 |
| hypothetical protein                                                   | 2892 | 1293760 | 1293888 | 0           | 0          | #DIV/0! |
| hypothetical protein                                                   |      | 1293903 | 1294022 | 0           | 0          | #DIV/0! |
| Nitrogenase iron protein (EC 1.18.6.1)                                 | 2890 | 1294089 | 1294931 | 8.423586041 | 12.3170878 | 1.46221 |
| Nitrogen regulatory protein P-II                                       | 2889 | 1295027 | 1295389 | 8.287292818 | 10.281768  | 1.24067 |
| Nitrogen regulatory protein P-II                                       | 2888 | 1295386 | 1295763 | 0           | 14.8090186 | #DIV/0! |
| Nitrogenase (molybdenum-iron) alpha chain (EC 1.18.6.1)                | 2887 | 1295773 | 1297413 | 6.097560976 | 13.0496951 | 2.14015 |
| Nitrogenase (molybdenum-iron) beta chain (EC 1.18.6.1)                 | 2886 | 1297426 | 1298802 | 8.810572687 | 8.19823789 | 0.9305  |
| Nitrogenase molybdenum-cofactor synthesis protein NifE                 | 2885 | 1298818 | 1300368 | 5.177993528 | 3.61359223 | 0.69788 |
| Nitrogenase molybdenum-cofactor synthesis protein NifN                 | 2884 | 1300365 | 1301753 | 1.44092219  | 6.03350144 | 4.18725 |
| FeMo cofactor biosynthesis protein NifB                                | 2883 | 1301750 | 1303036 | 1.555209953 | 3.61780715 | 2.32625 |
| Ferredoxin, 2Fe-2S                                                     | 2882 | 1303103 | 1303411 | 0           | 3.0211039  | #DIV/0! |
| GMP synthase [glutamine-hydrolyzing] (EC 6.3.5.2)                      | 2881 | 1303498 | 1304226 | 4.120879121 | 2.55631868 | 0.62033 |
| 2-isopropylmalate synthase (EC 2.3.3.13)                               | 2880 | 1304272 | 1305936 | 22.83653846 | 40.8212139 | 1.78754 |
| hypothetical protein                                                   |      | 1305926 | 1306321 | 101.2658228 | 138.986076 | 1.37249 |
| Molybdopterin biosynthesis protein A                                   | 2878 | 1306471 | 1307508 | 286.4030858 | 245.860174 | 0.85844 |
| Putative carboxymethylenebutenolidase (EC 3.1.1.45)                    | 2877 | 1307569 | 1308336 | 555.410691  | 544.712516 | 0.98074 |
| Putative arylsulfatase regulatory protein                              | 2876 | 1308342 | 1309607 | 181.027668  | 179.479842 | 0.99145 |
| hypothetical protein                                                   | 2875 | 1309939 | 1311318 | 31.90717912 | 20.2429297 | 0.63443 |
| hypothetical protein                                                   |      | 1311493 | 1311648 | 0           | 0          | #DIV/0! |
| Cytotoxic translational repressor of toxin-antitoxin stability system  | 2872 | 1311699 | 1312040 | 105.5718475 | 57.3035191 | 0.54279 |
| putative DNA-binding protein                                           | 2871 | 1312024 | 1312362 | 73.96449704 | 66.0710059 | 0.89328 |
| INTERGENIC                                                             |      | 1312363 | 1312651 | 79.13669065 | 100.413669 | 1.26886 |
| hypothetical protein                                                   | 2870 | 1312668 | 1312838 | 5.882352941 | 5.47352941 | 0.9305  |
| hypothetical protein                                                   | 2869 | 1312852 | 1313283 | 4.64037123  | 10.7946636 | 2.32625 |
| hypothetical protein                                                   | 2868 | 1313276 | 1313479 | 29.55665025 | 22.9187192 | 0.77542 |
| Flagellar protein flbB                                                 | 2866 | 1313841 | 1314458 | 769.8541329 | 461.479741 | 0.59944 |



|                                                                                                            |      |         |         |             |            |         |
|------------------------------------------------------------------------------------------------------------|------|---------|---------|-------------|------------|---------|
| Flagellar hook-length control protein fliK                                                                 | 2865 | 1314521 | 1315912 | 353.7023724 | 312.396477 | 0.88322 |
| Flagellar basal-body rod modification protein flgD                                                         | 2864 | 1315937 | 1316374 | 386.7276888 | 432.245995 | 1.1177  |
| Flagellar hook protein flgE                                                                                | 2863 | 1316388 | 1317818 | 518.1818182 | 671.521678 | 1.29592 |
| Flagellar protein flbD                                                                                     | 2862 | 1317950 | 1318147 | 263.9593909 | 155.870558 | 0.59051 |
| Flagellar motor rotation protein motA                                                                      | 2861 | 1318153 | 1318935 | 214.8337596 | 228.460358 | 1.06343 |
| Flagellar motor rotation protein motB                                                                      | 2860 | 1319014 | 1319745 | 148.1481481 | 242.517147 | 1.63699 |
| hypothetical protein                                                                                       | 2859 | 1319714 | 1319827 | 8.849557522 | 24.7035398 | 2.7915  |
| Flagellar biosynthesis protein fliL                                                                        | 2858 | 1319831 | 1320394 | 293.0728242 | 388.39698  | 1.32526 |
| hypothetical protein                                                                                       | 2857 | 1320429 | 1320551 | 32.78688525 | 15.2540984 | 0.46525 |
| Flagellar motor switch protein fliM                                                                        | 2856 | 1320548 | 1321579 | 173.6178468 | 179.601843 | 1.03447 |
| Flagellar motor switch protein fliN                                                                        | 2855 | 1321576 | 1322661 | 275.5760369 | 320.743779 | 1.1639  |
| Flagellar biosynthesis protein fliZ                                                                        | 2854 | 1322717 | 1323382 | 82.70676692 | 106.342857 | 1.28578 |
| Flagellar biosynthesis protein fliP                                                                        | 2853 | 1323379 | 1324206 | 103.406326  | 78.1076642 | 0.75535 |
| Flagellar biosynthesis protein fliQ                                                                        | 2852 | 1324220 | 1324489 | 29.73977695 | 58.8048327 | 1.97731 |
| Flagellar biosynthesis protein fliR                                                                        | 2851 | 1324592 | 1325407 | 28.2208589  | 46.8104294 | 1.65872 |
| Flagellar biosynthesis protein flhB                                                                        | 2850 | 1325404 | 1326546 | 45.53415061 | 75.7762697 | 1.66416 |
| Flagellar biosynthesis protein flhA                                                                        | 2849 | 1326586 | 1328685 | 81.94378275 | 111.713197 | 1.36329 |
| Flagellar biosynthesis protein flhF                                                                        | 2848 | 1328714 | 1330054 | 101.4925373 | 129.853358 | 1.27944 |
| Flagellar synthesis regulator fleN                                                                         | 2847 | 1330054 | 1330941 | 114.994363  | 148.963923 | 1.2954  |
| hypothetical protein                                                                                       | 2846 | 1330952 | 1331638 | 126.8221574 | 90.8797376 | 0.71659 |
| RNA polymerase sigma factor for flagellar operon                                                           | 2845 | 1331648 | 1332460 | 497.5369458 | 410.245074 | 0.82455 |
| hypothetical protein                                                                                       | 2844 | 1332489 | 1334459 | 150.2538071 | 115.722081 | 0.77018 |
| hypothetical protein                                                                                       | 2843 | 1334440 | 1334778 | 245.5621302 | 258.778107 | 1.05382 |
| Uncharacterized protein BB_0265                                                                            | 2842 | 1334785 | 1335558 | 120.3104787 | 98.7076326 | 0.82044 |
| hypothetical protein                                                                                       |      | 1335569 | 1335694 | 56          | 7.444      | 0.13293 |
| UDP-sugar hydrolase (EC 3.6.1.45); 5'-nucleotidase (EC 3.1.3.5)                                            | 2839 | 1335889 | 1337439 | 413.7483787 | 458.008755 | 1.10697 |
| Mutator mutT protein (7,8-dihydro-8-oxoguanine-triphosphatase) (EC 3.6.1.-)                                | 2838 | 1337622 | 1338059 | 66.36155606 | 40.4565217 | 0.60964 |
| hypothetical protein                                                                                       |      | 1338051 | 1338245 | 10.30927835 | 0          | 0       |
| Cell surface protein                                                                                       | 2836 | 1338258 | 1339172 | 66.73960613 | 38.6859956 | 0.57966 |
| N-acetylmuramoyl-L-alanine amidase/putative S-layer protein                                                | 2835 | 1339192 | 1340091 | 8.898776418 | 3.1051168  | 0.34894 |
| hypothetical protein                                                                                       | 2834 | 1340248 | 1340436 | 15.95744681 | 4.94946809 | 0.31017 |
| hypothetical protein                                                                                       |      | 1340588 | 1340743 | 45.16129032 | 18.0096774 | 0.39879 |
| hypothetical protein                                                                                       | 2832 | 1340776 | 1341087 | 221.8649518 | 179.517685 | 0.80913 |
| hypothetical protein                                                                                       | 2831 | 1341138 | 1341689 | 143.3756806 | 113.146098 | 0.78916 |
| PIN domain protein                                                                                         | 2830 | 1342437 | 1342733 | 37.16216216 | 47.1537162 | 1.26886 |
| hypothetical protein                                                                                       |      | 1342730 | 1343041 | 54.66237942 | 68.8151125 | 1.25891 |
| hypothetical protein                                                                                       | 2828 | 1343242 | 1344570 | 4.518072289 | 1.40135542 | 0.31017 |
| Uncharacterized protein TP_0789 precursor                                                                  | 2827 | 1344567 | 1345361 | 2.518891688 | 2.34382872 | 0.9305  |
| membrane protein, putative                                                                                 | 2826 | 1345369 | 1348011 | 0           | 0.70439061 | #DIV/0! |
| Transcriptional regulator                                                                                  | 2825 | 1348189 | 1348743 | 10.83032491 | 11.7572202 | 1.08558 |
| hypothetical protein                                                                                       | 2824 | 1348882 | 1350000 | 443.6493739 | 438.616726 | 0.98866 |
| Multi antimicrobial extrusion protein (Na <sup>+</sup> )/drug antiporter), MATE family of MDR efflux pumps | 2823 | 1350037 | 1351401 | 102.6392962 | 66.8541056 | 0.65135 |
| Sigma factor RpoE regulatory protein RseC                                                                  | 2822 | 1351508 | 1351918 | 34.14634146 | 18.1560976 | 0.53171 |
| hypothetical protein                                                                                       | 2821 | 1351969 | 1352085 | 0           | 16.0431034 | #DIV/0! |

|                                                                                  |      |         |         |             |            |         |
|----------------------------------------------------------------------------------|------|---------|---------|-------------|------------|---------|
| Putative ankyrin repeat-containing protein TP_0502                               | 2820 | 1352063 | 1352980 | 190.8396947 | 135.972737 | 0.7125  |
| NAD-dependent protein deacetylase of SIR2 family                                 | 2819 | 1352990 | 1353805 | 98.1595092  | 61.6527607 | 0.62809 |
| hypothetical protein                                                             | 2818 | 1353823 | 1354731 | 47.35682819 | 25.6194934 | 0.54099 |
| Glutamyl-tRNA synthetase (EC 6.1.1.17); Glutamyl-tRNA(Gln) synthetase            | 2819 | 1354742 | 1356244 | 127.8295606 | 128.857523 | 1.00804 |
| Peptidase M18, aminopeptidase I:Peptidase M20                                    | 2816 | 1356304 | 1357761 | 397.3919012 | 365.941318 | 0.92086 |
| hypothetical protein                                                             | 2815 | 1357803 | 1357988 | 556.7567568 | 382.259459 | 0.68658 |
| Leucyl/phenylalanyl-tRNA--protein transferase (EC 2.3.2.6)                       | 2814 | 1358048 | 1358809 | 39.4218134  | 53.8002628 | 1.36473 |
| ATP-dependent Clp protease ATP-binding subunit clpA                              | 2813 | 1358874 | 1361420 | 361.2421384 | 359.544615 | 0.9953  |
| ATP-dependent Clp protease adaptor protein clpS                                  | 2812 | 1361491 | 1361802 | 144.6945338 | 110.702572 | 0.76508 |
| Exodeoxyribonuclease III (EC 3.1.11.2)                                           | 2811 | 1361949 | 1362731 | 62.65984655 | 88.0524297 | 1.40524 |
| GlpG protein (membrane protein of glp regulon)                                   | 2810 | 1362741 | 1363310 | 56.23901582 | 42.5184534 | 0.75603 |
| hypothetical protein                                                             | 2809 | 1363303 | 1363995 | 40.46242775 | 32.2716763 | 0.79757 |
| hypothetical protein                                                             | 2808 | 1363989 | 1364831 | 39.19239905 | 43.0991686 | 1.09968 |
| Hypoxanthine-guanine phosphoribosyltransferase (EC 2.4.2.8)                      | 2807 | 1364904 | 1365518 | 275.2442997 | 239.444625 | 0.86993 |
| Ribonuclease HIII (EC 3.1.26.4)                                                  | 2806 | 1365528 | 1366139 | 52.37315876 | 82.2373159 | 1.57022 |
| hypothetical protein                                                             | 2805 | 1366237 | 1366476 | 405.8577406 | 194.665272 | 0.47964 |
| hypothetical protein                                                             |      | 1366466 | 1366714 | 145.1612903 | 116.3125   | 0.80126 |
| hypothetical protein                                                             | 2803 | 1367030 | 1367662 | 45.88607595 | 26.5015823 | 0.57755 |
| hypothetical protein                                                             | 2802 | 1367736 | 1367996 | 0           | 0          | #DIV/0! |
| Galactokinase (EC 2.7.1.6)                                                       | 2801 | 1368072 | 1369238 | 268.4391081 | 201.900943 | 0.75213 |
| 5'-nucleotidase surE (EC 3.1.3.5)                                                | 2800 | 1369235 | 1370017 | 60.10230179 | 83.2928389 | 1.38585 |
| TPR domain protein, putative component of TonB system                            | 2799 | 1370021 | 1370719 | 174.7851003 | 159.971347 | 0.91525 |
| hypothetical protein                                                             |      | 1370716 | 1372809 | 91.7343526  | 109.365982 | 1.1922  |
| hypothetical protein                                                             | 2797 | 1372883 | 1373158 | 10.90909091 | 3.38363636 | 0.31017 |
| Conserved domain protein                                                         | 2796 | 1373155 | 1373445 | 141.3793103 | 77.0068966 | 0.54468 |
| Thiamine biosynthesis protein thil                                               | 2795 | 1373529 | 1374710 | 65.19898391 | 55.1524132 | 0.84591 |
| Cysteine desulfurase (EC 2.8.1.7)                                                | 2794 | 1374710 | 1375864 | 96.18717504 | 119.336222 | 1.24067 |
| Transcriptional regulator, ArsR family                                           | 2793 | 1376031 | 1376321 | 134.4827586 | 51.337931  | 0.38174 |
| Undecaprenyl-phosphate N-acetylglucosaminyl 1-phosphate transferase (EC 2.7.8.-) | 2792 | 1376326 | 1377411 | 101.3824885 | 89.1907834 | 0.87975 |
| Aspartokinase (EC 2.7.2.4) / Homoserine dehydrogenase (EC 1.1.1.3)               | 2791 | 1377597 | 1380140 | 169.4848604 | 218.812033 | 1.29104 |
| hypothetical protein                                                             | 2790 | 1380165 | 1380290 | 16          | 7.444      | 0.46525 |
| hypothetical protein                                                             | 2789 | 1380425 | 1380676 | 63.74501992 | 33.3645418 | 0.52341 |
| hypothetical protein                                                             | 2788 | 1380686 | 1380934 | 108.8709677 | 135.072581 | 1.24067 |
| Flagellar hook-length control protein fliK                                       | 2787 | 1381369 | 1384683 | 9.656004828 | 10.3888051 | 1.07589 |
| putative autotransporter protein                                                 | 2786 | 1384698 | 1389701 | 10.99340396 | 12.4612233 | 1.13352 |
| Large repetitive protein                                                         | 2785 | 1389914 | 1393204 | 4.863221884 | 7.35349544 | 1.51206 |
| putative autotransporter protein                                                 | 2784 | 1393220 | 1396744 | 12.76958002 | 12.9382804 | 1.01321 |
| hypothetical protein                                                             |      | 1396746 | 1396886 | 0           | 0          | #DIV/0! |
| hypothetical protein                                                             | 2782 | 1396874 | 1397287 | 9.685230024 | 9.01210654 | 0.9305  |
| Cell surface protein                                                             |      | 1397340 | 1399262 | 6.25        | 5.33098958 | 0.85296 |



|                                                                                                            |      |         |         |             |            |         |
|------------------------------------------------------------------------------------------------------------|------|---------|---------|-------------|------------|---------|
| Treponemal membrane protein B precursor (Antigen tmpB)                                                     | 2780 | 1399267 | 1401744 | 4.844570044 | 7.13746468 | 1.47329 |
| Iron-sulfur cluster-binding protein                                                                        | 2779 | 1401778 | 1402638 | 46.51162791 | 55.180814  | 1.18639 |
| hypothetical protein                                                                                       | 2778 | 1402807 | 1403109 | 99.33774834 | 40.0546358 | 0.40322 |
| hypothetical protein                                                                                       | 2777 | 1403063 | 1403377 | 95.54140127 | 88.9012739 | 0.9305  |
| Iron-sulfur cluster-binding protein                                                                        | 2776 | 1403451 | 1404542 | 87.99266728 | 81.0242896 | 0.92081 |
| Glycogen phosphorylase (EC 2.4.1.1)                                                                        | 2775 | 1404662 | 1407202 | 1169.230769 | 1358.86036 | 1.16218 |
| hypothetical protein                                                                                       |      | 1407341 | 1407556 | 60.46511628 | 17.3116279 | 0.28631 |
| iron-sulfur flavoprotein                                                                                   | 2773 | 1407621 | 1408364 | 14.80484522 | 5.00942127 | 0.33836 |
| hypothetical protein                                                                                       | 2772 | 1408431 | 1408856 | 16.47058824 | 4.37882353 | 0.26586 |
| hypothetical protein                                                                                       | 2771 | 1408828 | 1409061 | 42.91845494 | 63.8969957 | 1.4888  |
| Sugar (Glycoside-Pentoside-Hexuronide) transporter                                                         | 2770 | 1409092 | 1410474 | 45.58610709 | 59.2503618 | 1.29975 |
| FKBP-type peptidyl-prolyl cis-trans isomerase fkIB (EC 5.2.1.8)                                            | 2769 | 1410632 | 1411342 | 349.2957746 | 448.212676 | 1.28319 |
| C4-type zinc finger protein, DksA/TraR family                                                              | 2768 | 1411834 | 1412166 | 280.1204819 | 355.944277 | 1.27068 |
| Histidinol-phosphatase (EC 3.1.3.15)                                                                       | 2767 | 1412191 | 1413069 | 109.3394077 | 113.398064 | 1.03712 |
| response regulator in two-component regulatory system with PhoQ                                            | 2766 | 1413078 | 1414445 | 75.34747623 | 76.917703  | 1.02084 |
| ThiJ/Pfpl family protein                                                                                   | 2765 | 1415124 | 1415693 | 65.25573192 | 77.1313933 | 1.18199 |
| hypothetical protein                                                                                       | 2764 | 1415733 | 1416134 | 127.1820449 | 141.547382 | 1.11295 |
| Phosphoesterase family protein                                                                             | 2763 | 1416131 | 1416967 | 162.6794258 | 171.407895 | 1.05365 |
| TPR domain protein, putative component of TonB system                                                      | 2762 | 1416982 | 1417533 | 337.5680581 | 227.980944 | 0.67536 |
| GAF domain/HD domain protein                                                                               | 2761 | 1417743 | 1419650 | 137.9129523 | 117.59334  | 0.85266 |
| hypothetical protein                                                                                       | 2760 | 1419743 | 1421194 | 125.4307374 | 135.951757 | 1.08388 |
| Heat shock protein 60 family co-chaperone GroES                                                            | 2759 | 1421315 | 1421581 | 1360.902256 | 1934.46053 | 1.42145 |
| hypothetical protein                                                                                       |      | 1421582 | 1421695 | 646.0176991 | 543.477876 | 0.84127 |
| RlpA-like lipoprotein precursor                                                                            | 2757 | 1421751 | 1422710 | 397.2888425 | 640.385819 | 1.61189 |
| hydrolase, haloacid dehalogenase-like family                                                               | 2756 | 1422777 | 1423619 | 283.847981  | 335.952494 | 1.18356 |
| Chromosome (plasmid) partitioning protein ParA / Sporulation initiation inhibitor protein soj              | 2755 | 1423742 | 1424500 | 141.1609499 | 168.177441 | 1.19139 |
| Chromosome (plasmid) partitioning protein ParB / Stage 0 sporulation protein J                             | 2754 | 1424490 | 1425485 | 95.47738693 | 149.628141 | 1.56716 |
| Transcriptional regulator, XRE family                                                                      | 2753 | 1425526 | 1425864 | 29.58579882 | 24.7766272 | 0.83745 |
| hypothetical protein                                                                                       | 2752 | 1426040 | 1426207 | 0           | 0          | #DIV/0! |
| Zn-dependent hydrolases, including glyoxylases                                                             | 2751 | 1426270 | 1427121 | 126.9095182 | 126.836663 | 0.99943 |
| Lysyl-tRNA synthetase (class I) (EC 6.1.1.6)                                                               | 2750 | 1427134 | 1428786 | 313.4872418 | 329.575638 | 1.05132 |
| Nucleoside diphosphate kinase (EC 2.7.4.6)                                                                 | 2749 | 1428795 | 1429973 | 521.2224109 | 689.58107  | 1.32301 |
| hypothetical protein                                                                                       | 2748 | 1429972 | 1430109 | 0           | 0          | #DIV/0! |
| Activator of (R)-2-hydroxyglutaryl-CoA dehydratase                                                         | 2747 | 1430112 | 1434536 | 51.53707052 | 59.1027351 | 1.1468  |
| membrane protein                                                                                           | 2746 | 1434538 | 1435113 | 31.30434783 | 35.6017391 | 1.13728 |
| HD family hydrolase, diverged                                                                              | 2745 | 1435110 | 1435568 | 28.38427948 | 28.4432314 | 1.00208 |
| Multi antimicrobial extrusion protein (Na <sup>+</sup> )/drug antiporter), MATE family of MDR efflux pumps | 2744 | 1435667 | 1437127 | 29.45205479 | 57.359589  | 1.94756 |
| hypothetical protein                                                                                       | 2743 | 1437275 | 1437919 | 246.8944099 | 255.743012 | 1.03584 |
| membrane protein                                                                                           | 2742 | 1437960 | 1438553 | 145.0252951 | 128.669477 | 0.88722 |

|                                                                                                            |      |         |         |             |            |         |
|------------------------------------------------------------------------------------------------------------|------|---------|---------|-------------|------------|---------|
| ATPase                                                                                                     | 2740 | 1439028 | 1440257 | 18.71440195 | 13.628153  | 0.72822 |
| Type I restriction-modification system, restriction subunit R (EC 3.1.21.3)                                | 2739 | 1440645 | 1443866 | 37.5659733  | 32.6440546 | 0.86898 |
| DNA-binding protein                                                                                        | 2738 | 1444014 | 1445165 | 59.94787142 | 33.1455256 | 0.55291 |
| hypothetical protein                                                                                       | 2737 | 1445162 | 1445638 | 56.72268908 | 31.2773109 | 0.55141 |
| Type I restriction-modification system, specificity subunit S (EC 3.1.21.3)                                | 2736 | 1445653 | 1446870 | 8.216926869 | 6.88126541 | 0.83745 |
| ATP-dependent DNA helicase                                                                                 | 2735 | 1446867 | 1447295 | 16.35514019 | 26.088785  | 1.59514 |
| Type I restriction-modification system, DNA-methyltransferase subunit M (EC 2.1.1.72)                      | 2734 | 1447292 | 1448992 | 19.41176471 | 20.2520588 | 1.04329 |
| Methyl-accepting chemotaxis protein                                                                        | 2733 | 1449014 | 1451110 | 26.30320421 | 38.715208  | 1.47188 |
| hypothetical protein                                                                                       | 2732 | 1451251 | 1452597 | 87.66716196 | 124.435364 | 1.41941 |
| RNA polymerase sigma-54 factor rpoN                                                                        | 2731 | 1452788 | 1454146 | 192.9307806 | 165.132916 | 0.85592 |
| Ribosome hibernation protein YhbH                                                                          | 2729 | 1454173 | 1454514 | 76.24633431 | 51.8460411 | 0.67998 |
| 23S rRNA (guanine-N-2-) -methyltransferase rmlL EC 2.1.1.-)                                                | 2730 | 1454501 | 1455571 | 62.61682243 | 40.8724299 | 0.65274 |
| Redox-sensitive transcriptional regulator (AT-rich DNA-binding protein)                                    | 2728 | 1455552 | 1456283 | 154.5827633 | 110.743502 | 0.7164  |
| Methionine ABC transporter substrate-binding protein                                                       | 2727 | 1456332 | 1457141 | 64.27688504 | 102.366502 | 1.59259 |
| hypothetical protein                                                                                       | 2726 | 1457235 | 1457798 | 51.50976909 | 84.2904085 | 1.6364  |
| Phosphomannomutase (EC 5.4.2.8) / Phosphoglucosamine mutase (EC 5.4.2.10)                                  | 2725 | 1457800 | 1459713 | 115.0026137 | 132.789597 | 1.15467 |
| Cysteine desulfurase (EC 2.8.1.7)                                                                          | 2724 | 1459938 | 1461128 | 140.5723906 | 155.866582 | 1.1088  |
| Iron-sulfur cluster assembly scaffold protein NifU                                                         | 2723 | 1461166 | 1461768 | 539.8671096 | 618.272425 | 1.14523 |
| hypothetical protein                                                                                       | 2721 | 1462503 | 1462898 | 2.53164557  | 7.06708861 | 2.7915  |
| hypothetical protein                                                                                       | 2720 | 1462944 | 1463141 | 71.06598985 | 23.6167513 | 0.33232 |
| hypothetical protein                                                                                       | 2719 | 1463171 | 1463614 | 66.8202765  | 47.1682028 | 0.7059  |
| hypothetical protein                                                                                       | 2718 | 1463619 | 1463867 | 173.3870968 | 120.064516 | 0.69247 |
| hypothetical protein                                                                                       | 2717 | 1464321 | 1464761 | 34.09090909 | 19.0329545 | 0.5583  |
| hypothetical protein                                                                                       | 2716 | 1464884 | 1465348 | 4.310344828 | 10.0269397 | 2.32625 |
| hypothetical protein                                                                                       | 2715 | 1465404 | 1465637 | 4.291845494 | 0          | 0       |
| hypothetical protein                                                                                       | 2714 | 1465851 | 1466276 | 0           | 2.18941176 | #DIV/0! |
| hypothetical protein                                                                                       | 2713 | 1466276 | 1466614 | 0           | 0          | #DIV/0! |
| Outer membrane protein                                                                                     | 2712 | 1466649 | 1467920 | 1.573564123 | 1.46420142 | 0.9305  |
| RND multidrug efflux transporter; Acriflavin resistance protein                                            | 2711 | 1467955 | 1471065 | 4.823151125 | 4.48794212 | 0.9305  |
| Membrane fusion protein of RND family multidrug efflux pump                                                | 2710 | 1471062 | 1472174 | 2.697841727 | 2.51034173 | 0.9305  |
| hypothetical protein                                                                                       | 2709 | 1472511 | 1472912 | 0           | 2.32044888 | #DIV/0! |
| Rrf2 family transcriptional regulator, group III                                                           | 2708 | 1472966 | 1473400 | 6.912442396 | 2.14400922 | 0.31017 |
| transcriptional regulator, MarR family                                                                     | 2707 | 1473408 | 1473860 | 0           | 6.40252294 | #DIV/0! |
| Multi antimicrobial extrusion protein (Na <sup>+</sup> )/drug antiporter), MATE family of MDR efflux pumps | 2706 | 1473850 | 1475205 | 5.559968229 | 6.6517077  | 1.19636 |
| sensor histidine kinase                                                                                    | 2705 | 1475297 | 1476388 | 3.666361137 | 5.11732356 | 1.39575 |
| DNA-binding response regulator, OmpR family                                                                | 2704 | 1476385 | 1477056 | 4.470938897 | 11.0938897 | 2.48133 |
| hypothetical protein                                                                                       | 2703 | 1477034 | 1477240 | 0           | 0          | #DIV/0! |
| hypothetical protein                                                                                       | 2702 | 1477250 | 1477897 | 38.63987635 | 27.3253478 | 0.70718 |
| MoxR-like ATPases                                                                                          | 2701 | 1477888 | 1478955 | 27.17900656 | 23.5459231 | 0.86633 |
| hypothetical protein                                                                                       | 2700 | 1479006 | 1480064 | 10.39697543 | 6.15642722 | 0.59214 |

|                                                                        |      |         |         |             |            |         |
|------------------------------------------------------------------------|------|---------|---------|-------------|------------|---------|
| Ferredoxin                                                             | 2699 | 1480173 | 1481195 | 116.4383562 | 138.391389 | 1.18854 |
| hypothetical protein                                                   | 2698 | 1481188 | 1482087 | 47.83092325 | 63.1373749 | 1.32001 |
| Aspartate aminotransferase (EC 2.6.1.1)                                | 2697 | 1482240 | 1483457 | 140.5094495 | 170.502465 | 1.21346 |
| Histidyl-tRNA synthetase (EC 6.1.1.21)                                 | 2696 | 1483489 | 1484811 | 91.5279879  | 111.209531 | 1.21503 |
| hypothetical protein                                                   | 2695 | 1484858 | 1485652 | 73.04785894 | 86.7216625 | 1.18719 |
| hypothetical protein                                                   | 2694 | 1485669 | 1486901 | 247.5649351 | 226.582792 | 0.91525 |
| Uncharacterized protein TP_0608                                        | 2693 | 1486935 | 1487654 | 869.2628651 | 793.319193 | 0.91263 |
| Uncharacterized lipoprotein TP_0503 precursor                          | 2692 | 1487773 | 1488357 | 229.4520548 | 229.438356 | 0.99994 |
| Phosphopantetheine adenylyltransferase (EC 2.7.7.3)                    | 2691 | 1488410 | 1488886 | 86.13445378 | 54.7352941 | 0.63546 |
| Acyl carrier protein / HmrB protein involved in methicillin resistance | 2690 | 1489908 | 1490144 | 1529.661017 | 934.442797 | 0.61088 |
| Ribonuclease III (EC 3.1.26.3)                                         | 2689 | 1490110 | 1490961 | 247.9435958 | 262.420682 | 1.05839 |
| hypothetical protein                                                   | 2688 | 1491041 | 1491556 | 95.14563107 | 99.3737864 | 1.04444 |
| tRNA nucleotidyltransferase (EC 2.7.7.25)                              | 2687 | 1491566 | 1492927 | 69.0668626  | 88.1958119 | 1.27696 |
| Thiamin pyrophosphokinase (EC 2.7.6.2)                                 | 2686 | 1493031 | 1493678 | 64.91499227 | 67.5942813 | 1.04127 |
| SSU ribosomal protein S6p                                              | 2685 | 1493774 | 1494055 | 1740.213523 | 1861       | 1.06941 |
| Single-stranded DNA-binding protein                                    | 2684 | 1494061 | 1494528 | 732.3340471 | 896.627409 | 1.22434 |
| SSU ribosomal protein S18p                                             | 2683 | 1494552 | 1494872 | 1831.25     | 2012.20625 | 1.09882 |
| hypothetical protein                                                   | 2682 | 1494970 | 1495947 | 168.8843398 | 206.671955 | 1.22375 |
| LSU ribosomal protein L9p                                              | 2681 | 1496093 | 1496686 | 318.7183811 | 376.593592 | 1.18159 |
| Replicative DNA helicase (EC 3.6.1.-) [SA14-24]                        | 2680 | 1496687 | 1498066 | 148.6584482 | 226.046048 | 1.52057 |
| hypothetical protein                                                   | 2678 | 1498342 | 1498638 | 104.7297297 | 110.025338 | 1.05056 |
| Uncharacterized protein TP_0598                                        | 2679 | 1498635 | 1500605 | 138.071066  | 174.763959 | 1.26575 |
| hypothetical protein                                                   |      | 1500570 | 1500749 | 324.0223464 | 155.949721 | 0.48129 |
| Membrane-associated zinc metalloprotease                               | 2677 | 1500735 | 1502090 | 129.8892989 | 129.789299 | 0.99923 |
| 1-deoxy-D-xylulose 5-phosphate reductoisomerase (EC 1.1.1.267)         | 2675 | 1502091 | 1503239 | 95.81881533 | 114.28615  | 1.19273 |
| Phosphatidate cytidyltransferase (EC 2.7.7.41)                         | 2674 | 1503254 | 1504108 | 149.882904  | 155.809719 | 1.03954 |
| Undecaprenyl pyrophosphate synthetase (EC 2.5.1.31)                    | 2673 | 1504101 | 1504844 | 422.6110363 | 274.265814 | 0.64898 |
| Ribosome recycling factor                                              | 2672 | 1504899 | 1505453 | 435.0180505 | 475.327617 | 1.09266 |
| Translation elongation factor Ts                                       | 2671 | 1505471 | 1506319 | 639.1509434 | 706.653302 | 1.10561 |
| SSU ribosomal protein S2p (SAe)                                        | 2670 | 1506408 | 1507328 | 911.2627986 | 1336.99829 | 1.46719 |
| Septum formation protein Maf                                           | 2669 | 1507492 | 1508079 | 52.8109029  | 61.8219761 | 1.17063 |
| hypothetical protein                                                   | 2668 | 1508169 | 1508645 | 126.0504202 | 111.42542  | 0.88398 |
| Multidrug resistance ABC transporter ATP-binding and permease protein  | 2667 | 1508648 | 1510480 | 27.29257642 | 23.8719978 | 0.87467 |
| Multidrug resistance ABC transporter ATP-binding and permease protein  | 2666 | 1510482 | 1512224 | 32.14695752 | 23.5028703 | 0.73111 |
| hypothetical protein                                                   | 2664 | 1512784 | 1513290 | 0           | 0          | #DIV/0! |
| Cell surface protein                                                   | 2663 | 1513303 | 1514667 | 2.19941349  | 2.04655425 | 0.9305  |
| Conserved domain protein                                               | 2662 | 1514680 | 1516935 | 5.798394291 | 9.13068689 | 1.57469 |
| Isocitrate dehydrogenase [NADP] (EC 1.1.1.42)                          | 2661 | 1516945 | 1518144 | 111.946533  | 153.917293 | 1.37492 |
| L-arabinose-specific 1-epimerase (mutarotase)                          | 2660 | 1518268 | 1519320 | 107.4144487 | 107.909696 | 1.00461 |
| hypothetical protein                                                   |      | 1519314 | 1519430 | 25.86206897 | 0          | 0       |
| V-type ATP synthase subunit E (EC 3.6.3.14) (V-type ATPase subunit E)  | 2658 | 1519442 | 1520056 | 793.1596091 | 656.199511 | 0.82732 |
| hypothetical protein                                                   | 2657 | 1520060 | 1520662 | 602.9900332 | 588.904485 | 0.97664 |

|                                                                           |      |         |         |             |            |         |
|---------------------------------------------------------------------------|------|---------|---------|-------------|------------|---------|
| V-type ATP synthase subunit A (EC 3.6.3.14)                               | 2656 | 1520659 | 1522419 | 656.8627451 | 847.860438 | 1.29077 |
| V-type ATP synthase beta chain 1 (EC 3.6.3.14)                            |      |         |         |             |            |         |
| (V-type ATPase subunit B 1)                                               | 2655 | 1522489 | 1523787 | 504.3137255 | 553.921176 | 1.09837 |
| V-type ATP synthase subunit D 1 (EC 3.6.3.14) (V type ATPase subunit D 1) | 2654 | 1523799 | 1524401 | 1224.252492 | 1013.96678 | 0.82823 |
| V-type ATP synthase subunit I (EC 3.6.3.14)                               | 2653 | 1524427 | 1526364 | 331.7805383 | 352.068064 | 1.06115 |
| V-type ATP synthase subunit K (EC 3.6.3.14)                               | 2652 | 1526649 | 1527089 | 820.4545455 | 1137.74773 | 1.38673 |
| 1-hydroxy-2-methyl-2-(E)-butenyl 4-diphosphate synthase (EC 1.17.4.3)     | 2651 | 1527168 | 1528247 | 117.7015755 | 144.878591 | 1.2309  |
| hypothetical protein                                                      | 2650 | 1528564 | 1529124 | 532.1428571 | 378.846429 | 0.71193 |
| Uncharacterized protein BB_0089                                           | 2649 | 1529288 | 1530457 | 125.748503  | 107.457228 | 0.85454 |
| hypothetical protein                                                      | 2648 | 1530518 | 1531096 | 316.6089965 | 196.403114 | 0.62033 |
| Uracil phosphoribosyltransferase (EC 2.4.2.9)                             | 2647 | 1531121 | 1532191 | 412.1495327 | 435.68271  | 1.0571  |
| TPR domain protein, putative component of TonB system                     | 2646 | 1532188 | 1533213 | 200.9756098 | 215.149756 | 1.07053 |
| YlxP-like protein                                                         | 2645 | 1533228 | 1533515 | 127.6595745 | 191.379433 | 1.49914 |
| hypothetical protein                                                      | 2643 | 1533525 | 1534217 | 174.8554913 | 213.799855 | 1.22272 |
| membrane protein, putative                                                | 2644 | 1534209 | 1536257 | 21.97265625 | 22.2629395 | 1.01321 |
| lipoprotein, putative                                                     | 2642 | 1536378 | 1537058 | 61.76470588 | 47.8933824 | 0.77542 |
| tRNA (guanine46-N7-)-methyltransferase (EC 2.1.1.33)                      | 2641 | 1537060 | 1537734 | 114.2433234 | 75.9310089 | 0.66464 |
| DNA ligase (EC 6.5.1.2)                                                   | 2640 | 1537752 | 1539722 | 110.6598985 | 107.220051 | 0.96892 |
| ATP-dependent helicase HrpB                                               | 2639 | 1539719 | 1542496 | 14.76413396 | 25.8006842 | 1.74752 |
| hypothetical protein                                                      | 2638 | 1542721 | 1542864 | 6.993006993 | 0          | 0       |
| hypothetical protein                                                      |      | 1542884 | 1543300 | 144.2307692 | 154.33774  | 1.07008 |
| hypothetical protein                                                      | 2636 | 1543306 | 1543503 | 172.5888325 | 136.977157 | 0.79366 |
| hypothetical protein                                                      | 2635 | 1543543 | 1544169 | 75.0798722  | 144.182907 | 1.92039 |
| Thymidylate kinase (EC 2.7.4.9)                                           | 2634 | 1544144 | 1544809 | 51.12781955 | 47.5744361 | 0.9305  |
| hypothetical protein                                                      | 2633 | 1544960 | 1549561 | 51.51054119 | 34.9872854 | 0.67923 |
| Outer membrane protein assembly factor YaeT precursor                     | 2632 | 1549561 | 1552071 | 214.7410359 | 159.779084 | 0.74405 |
| Outer membrane protein H precursor                                        | 2631 | 1552087 | 1552617 | 471.6981132 | 308.996226 | 0.65507 |
| DNA mismatch repair protein MutS                                          | 2630 | 1552704 | 1555424 | 113.6029412 | 103.312868 | 0.90942 |
| hypothetical protein                                                      | 2629 | 1555528 | 1556385 | 2.333722287 | 5.42882147 | 2.32625 |
| Competence protein F                                                      | 2628 | 1556399 | 1557154 | 9.271523179 | 12.3245033 | 1.32929 |
| Pyridoxal kinase (EC 2.7.1.35)                                            | 2627 | 1557168 | 1558025 | 66.51108518 | 74.9177363 | 1.12639 |
| Transcriptional regulator                                                 | 2626 | 1558038 | 1558985 | 64.61864407 | 71.9560381 | 1.11355 |
| hypothetical protein                                                      | 2625 | 1558972 | 1559640 | 53.89221557 | 84.9708084 | 1.57668 |
| TPR domain protein, putative component of TonB system                     | 2624 | 1559763 | 1560470 | 66.47807638 | 97.3932107 | 1.46504 |
| TPR domain protein, putative component of TonB system                     | 2623 | 1560488 | 1562473 | 70.02518892 | 84.8465995 | 1.21166 |
| ACT domain protein                                                        | 2622 | 1562546 | 1562815 | 66.91449814 | 72.6412639 | 1.08558 |
| Glycerol-3-phosphate dehydrogenase (NAD(P)+) (EC 1.1.1.94)                | 2621 | 1562948 | 1564309 | 133.8757396 | 172.748151 | 1.29036 |
| hypothetical protein                                                      | 2620 | 1564379 | 1564618 | 205.0209205 | 116.799163 | 0.56969 |
| hypothetical protein                                                      | 2619 | 1564611 | 1564874 | 98.85931559 | 127.368821 | 1.28838 |
| Internalin-like protein (LPXTG motif) Lin1204 homolog                     | 2618 | 1565153 | 1566250 | 34.63992707 | 52.5897903 | 1.51818 |
| putative autotransporter protein                                          |      | 1566265 | 1568820 | 23.48336595 | 38.239726  | 1.62838 |
| putative DNA-binding protein                                              | 2616 | 1568928 | 1569215 | 48.7804878  | 25.9372822 | 0.53171 |
| hypothetical protein                                                      | 2615 | 1569215 | 1569355 | 107.1428571 | 6.64642857 | 0.06203 |

|                                                                   |      |         |         |             |            |         |
|-------------------------------------------------------------------|------|---------|---------|-------------|------------|---------|
| hypothetical protein                                              | 2614 | 1569484 | 1569663 | 33.51955307 | 25.9916201 | 0.77542 |
| hypothetical protein                                              | 2613 | 1569660 | 1570088 | 35.04672897 | 26.088785  | 0.7444  |
| hypothetical protein                                              | 2612 | 1570110 | 1570604 | 10.12145749 | 7.53441296 | 0.7444  |
| hypothetical protein, putative phage associated protein           | 2611 | 1570626 | 1571309 | 43.9238653  | 46.3206442 | 1.05457 |
| ToIA protein                                                      | 2610 | 1571356 | 1573320 | 40.22403259 | 58.2746945 | 1.44875 |
| hypothetical protein                                              |      | 1573311 | 1573433 | 8.196721311 | 0          | 0       |
| DinG family ATP-dependent helicase YoaA                           | 2608 | 1573433 | 1575946 | 83.96339037 | 92.1983685 | 1.09808 |
| hypothetical protein                                              | 2607 | 1575963 | 1577465 | 95.87217044 | 87.3505326 | 0.91111 |
| Iron-sulfur cluster regulator IscR                                | 2606 | 1577529 | 1577948 | 71.59904535 | 97.7136038 | 1.36473 |
| Helicase PriA essential for oriC/DnaA-independent DNA replication | 2605 | 1578138 | 1580123 | 90.68010076 | 103.128463 | 1.13728 |
| DNA polymerase, bacteriophage-type                                | 2604 | 1580126 | 1580998 | 180.0458716 | 165.398509 | 0.91865 |
| Ribonucleotide reductase transcriptional regulator NrdR           | 2603 | 1581042 | 1581509 | 164.882227  | 139.475375 | 0.84591 |
| Glycosyltransferase                                               | 2602 | 1581690 | 1582823 | 146.5136805 | 153.57767  | 1.04821 |
| ATP-dependent protease La (EC 3.4.21.53) Type I                   | 2601 | 1582827 | 1585316 | 55.04218562 | 69.1613098 | 1.25651 |
| ATP-dependent Clp protease ATP-binding subunit clpX               | 2600 | 1585324 | 1586577 | 313.7570394 | 345.100965 | 1.0999  |
| ATP-dependent Clp protease proteolytic subunit (EC 3.4.21.92)     | 2599 | 1586561 | 1587175 | 211.7263844 | 233.382736 | 1.10228 |
| Cell division trigger factor (EC 5.2.1.8)                         | 2598 | 1587188 | 1588549 | 211.6091109 | 201.004409 | 0.94989 |
| hypothetical protein                                              |      | 1588514 | 1588726 | 56.60377358 | 92.1721698 | 1.62838 |
| hypothetical protein                                              |      | 1589540 | 1590019 | 0           | 0          | #DIV/0! |
| Exodeoxyribonuclease V alpha chain (EC 3.1.11.5)                  | 2594 | 1590344 | 1592476 | 0.469043152 | 0          | 0       |
| hypothetical protein                                              | 2593 | 1592674 | 1592817 | 0           | 0          | #DIV/0! |
| hypothetical protein                                              | 2592 | 1592932 | 1593168 | 0           | 0          | #DIV/0! |
| hypothetical protein                                              | 2591 | 1593161 | 1593586 | 0           | 0          | #DIV/0! |
| Exonuclease SbcC                                                  | 2590 | 1593849 | 1594610 | 0           | 0          | #DIV/0! |
| Site-specific recombinase, phage integrase family                 | 2589 | 1594624 | 1596099 | 1.355932203 | 1.26169492 | 0.9305  |
| hypothetical protein                                              | 2584 | 1597814 | 1598227 | 133.1719128 | 110.398305 | 0.82899 |
| hypothetical protein                                              | 2583 | 1598202 | 1598336 | 22.3880597  | 20.8320896 | 0.9305  |
| Excinuclease ABC subunit A                                        | 2582 | 1598551 | 1601478 | 188.2473522 | 184.383328 | 0.97947 |
| hypothetical protein                                              |      | 1601475 | 1604993 | 67.65207504 | 81.465037  | 1.20418 |
| Transcription termination factor Rho                              | 2580 | 1605225 | 1607132 | 514.8462354 | 603.394221 | 1.17199 |
| LSU ribosomal protein L31p                                        | 2579 | 1607189 | 1607392 | 866.9950739 | 1026.75862 | 1.18427 |
| T. pallidum predicted coding region TP0665                        |      | 1607423 | 1608097 | 195.8456973 | 201.562315 | 1.02919 |
| hypothetical protein                                              | 2577 | 1608181 | 1608327 | 0           | 0          | #DIV/0! |
| Cell division protein mraZ                                        | 2576 | 1608284 | 1608748 | 211.2068966 | 254.684267 | 1.20585 |
| S-adenosyl-methyltransferase mraW (EC 2.1.1.-)                    | 2575 | 1608756 | 1609706 | 134.7368421 | 150.838947 | 1.11951 |
| cell division protein FtsL, putative                              | 2574 | 1609703 | 1609996 | 122.8668942 | 142.909556 | 1.16313 |
| Phospho-N-acetylmuramoyl-pentapeptide-transferase (EC 2.7.8.13)   | 2573 | 1610142 | 1611221 | 84.3373494  | 49.1552363 | 0.58284 |
| Cell division protein ftsW                                        | 2572 | 1611221 | 1612354 | 78.55251545 | 72.2718447 | 0.92004 |
| Cell division protein ftsQ                                        | 2571 | 1612347 | 1613168 | 108.4043849 | 85.0030451 | 0.78413 |
| Cell division protein ftsA                                        | 2570 | 1613161 | 1614429 | 149.0536278 | 165.846215 | 1.11266 |
| Cell division protein ftsZ (EC 3.4.24.-)                          | 2569 | 1614530 | 1615741 | 241.1230388 | 264.320396 | 1.09621 |
| Site-specific tyrosine recombinase                                | 2568 | 1615757 | 1616656 | 78.97664071 | 96.2586207 | 1.21882 |



|                                                                                                                           |      |         |         |             |            |         |
|---------------------------------------------------------------------------------------------------------------------------|------|---------|---------|-------------|------------|---------|
| TPR domain protein                                                                                                        | 2567 | 1616664 | 1617410 | 150.1340483 | 129.72118  | 0.86404 |
| Rossmann fold nucleotide-binding protein Smf possibly involved in DNA uptake                                              | 2566 | 1617403 | 1618383 | 88.7755102  | 63.6158163 | 0.71659 |
| DNA topoisomerase I (EC 5.99.1.2)                                                                                         | 2565 | 1618390 | 1620558 | 136.1957525 | 100.095337 | 0.73494 |
| Site-specific tyrosine recombinase                                                                                        | 2564 | 1620548 | 1621516 | 111.5702479 | 128.808884 | 1.15451 |
| ATP-dependent protease hslV (EC 3.4.25.-)                                                                                 | 2563 | 1621513 | 1622085 | 166.0839161 | 146.407343 | 0.88153 |
| ATP-dependent hsl protease ATP-binding subunit hslU                                                                       | 2562 | 1622085 | 1623665 | 200.1274697 | 152.414595 | 0.76159 |
| Flagellar basal-body rod protein flgB                                                                                     | 2561 | 1623718 | 1624134 | 305.2884615 | 290.78125  | 0.95248 |
| Flagellar basal-body rod protein flgC                                                                                     | 2560 | 1624146 | 1624604 | 388.6462882 | 514.009825 | 1.32256 |
| Flagellar hook-basal body complex protein fliE                                                                            | 2559 | 1624624 | 1625022 | 241.2060302 | 175.345477 | 0.72695 |
| Flagellar M-ring protein fliF                                                                                             | 2558 | 1625121 | 1626827 | 176.366843  | 167.391534 | 0.94911 |
| Flagellar motor switch protein fliG                                                                                       | 2557 | 1626831 | 1627889 | 180.5293006 | 170.620983 | 0.94512 |
| Flagellar assembly protein fliH                                                                                           | 2556 | 1627886 | 1628923 | 172.6133076 | 128.313886 | 0.74336 |
| Flagellum-specific ATP synthase flil                                                                                      | 2555 | 1628932 | 1630281 | 167.5315048 | 222.106004 | 1.32576 |
| Flagellar protein flilJ                                                                                                   | 2554 | 1630278 | 1630736 | 76.41921397 | 105.646288 | 1.38246 |
| ABC-type nitrate/sulfonate/bicarbonate transport systems, periplasmic components                                          | 2553 | 1630769 | 1631791 | 122.3091977 | 132.928571 | 1.08682 |
| ABC-type nitrate/sulfonate/bicarbonate transport system, permease component                                               | 2552 | 1631781 | 1632533 | 73.13829787 | 111.363032 | 1.52264 |
| Alkanesulfonates ABC transporter ATP-binding protein / Sulfonate ABC transporter, ATP-binding subunit SsuB                | 2551 | 1632530 | 1633249 | 51.46036161 | 100.944367 | 1.96159 |
| hypothetical protein                                                                                                      | 2550 | 1633393 | 1634715 | 40.09077156 | 33.0813162 | 0.82516 |
| hypothetical protein                                                                                                      | 2549 | 1634715 | 1635488 | 53.04010349 | 57.7800776 | 1.08937 |
| Lipoprotein releasing system transmembrane protein LolC                                                                   | 2548 | 1635488 | 1636792 | 26.07361963 | 19.9800613 | 0.76629 |
| Macrolide export ATP-binding/permease protein macB (EC 3.6.3.-)                                                           |      | 1636795 | 1638243 | 37.98342541 | 35.3435773 | 0.9305  |
| Cell division transporter, ATP-binding protein ftsE (TC 3.A.5.1.1)                                                        | 2546 | 1638240 | 1638923 | 79.06295754 | 47.6830161 | 0.6031  |
| Undecaprenyl-phosphate galactosephosphotransferase (EC 2.7.8.6)                                                           | 2545 | 1638936 | 1640303 | 24.87198244 | 20.4206291 | 0.82103 |
| [Citrate [pro-3S]-lyase] ligase (EC 6.2.1.22)                                                                             | 2544 | 1640313 | 1642316 | 52.42136795 | 28.3377434 | 0.54058 |
| [Citrate [pro-3S]-lyase] ligase (EC 6.2.1.22)                                                                             | 2543 | 1642333 | 1644342 | 74.16625187 | 54.653559  | 0.73691 |
| [Citrate [pro-3S]-lyase] ligase (EC 6.2.1.22)                                                                             | 2542 | 1644359 | 1646401 | 90.59745348 | 56.0487267 | 0.61866 |
| [Citrate [pro-3S]-lyase] ligase (EC 6.2.1.22)                                                                             | 2541 | 1646418 | 1648454 | 85.95284872 | 47.9874754 | 0.5583  |
| 2-succinyl-6-hydroxy-2,4-cyclohexadiene-1-carboxylate synthase (EC 2.5.1.64) / 2-oxoglutarate decarboxylase (EC 4.1.1.71) | 2540 | 1648485 | 1651403 | 49.34886909 | 35.0771076 | 0.7108  |
| putative glycosyltransferase                                                                                              | 2539 | 1651396 | 1653180 | 60.53811659 | 38.5969731 | 0.63756 |
| Polysaccharide ABC transporter, ATP-binding protein                                                                       | 2538 | 1653177 | 1653947 | 189.6103896 | 108.75974  | 0.5736  |
| O-antigen export system permease protein RfbD                                                                             | 2537 | 1653948 | 1654724 | 54.12371134 | 35.9729381 | 0.66464 |
| putative glycosyltransferase                                                                                              | 2536 | 1654731 | 1656320 | 68.59660164 | 45.6758968 | 0.66586 |
| Putative N-acetylgalactosaminyl-diphosphoundecaprenol glucuronosyltransferase                                             | 2535 | 1656327 | 1657085 | 17.15039578 | 12.2757256 | 0.71577 |
| Glycosyltransferase                                                                                                       | 2534 | 1657096 | 1658076 | 60.20408163 | 53.1714286 | 0.88319 |
| UDP-galactopyranose mutase (EC 5.4.99.9)                                                                                  | 2533 | 1658073 | 1659188 | 99.55156951 | 103.481614 | 1.03948 |



|                                                                                                                                      |      |         |         |             |            |         |
|--------------------------------------------------------------------------------------------------------------------------------------|------|---------|---------|-------------|------------|---------|
| DNA-directed RNA polymerase omega chain (EC 2.7.7.6) (RNAP omega subunit) (Transcriptase omega chain) (RNA polymerase omega subunit) | 2532 | 1659624 | 1659818 | 164.9484536 | 191.85567  | 1.16313 |
| tRNA delta(2)-isopentenylpyrophosphate transferase (EC 2.5.1.8)                                                                      | 2531 | 1659852 | 1660850 | 58.11623246 | 61.5360721 | 1.05884 |
| hypothetical protein                                                                                                                 |      | 1661319 | 1661483 | 6.097560976 | 5.67378049 | 0.9305  |
| hypothetical protein                                                                                                                 | 2529 | 1661743 | 1662159 | 122.5961538 | 98.4182692 | 0.80278 |
| Isoleucyl-tRNA synthetase (EC 6.1.1.5)                                                                                               | 2528 | 1662259 | 1665489 | 153.7025513 | 198.607032 | 1.29215 |
| hypothetical protein                                                                                                                 | 2527 | 1665492 | 1666439 | 76.02956705 | 78.6061246 | 1.03389 |
| hypothetical protein                                                                                                                 | 2526 | 1666457 | 1666747 | 341.3793103 | 320.862069 | 0.9399  |
| hypothetical protein                                                                                                                 | 2525 | 1666757 | 1667065 | 81.16883117 | 108.75974  | 1.33992 |
| hypothetical protein                                                                                                                 | 2524 | 1667129 | 1672678 | 38.9259326  | 29.1776897 | 0.74957 |
| Multimodular transpeptidase-transglycosylase (EC 2.4.1.129) (EC 3.4.-.-)                                                             | 2523 | 1672687 | 1675242 | 34.83365949 | 31.6843444 | 0.90959 |
| hypothetical protein                                                                                                                 | 2522 | 1675389 | 1677158 | 195.0254381 | 167.795082 | 0.86038 |
| COG1180: Radical SAM, Pyruvate-formate lyase-activating enzyme like                                                                  | 2521 | 1677244 | 1678263 | 33.36604514 | 42.0049068 | 1.25891 |
| hypothetical protein                                                                                                                 | 2520 | 1678260 | 1678637 | 90.18567639 | 69.1087533 | 0.76629 |
| NADH pyrophosphatase (EC 3.6.1.22)                                                                                                   | 2518 | 1678667 | 1679566 | 84.53837597 | 110.749166 | 1.31005 |
| hypothetical protein                                                                                                                 | 2519 | 1679563 | 1679913 | 625.7142857 | 475.884286 | 0.76055 |
| TPR repeat                                                                                                                           | 2517 | 1679964 | 1681013 | 219.2564347 | 234.177312 | 1.06805 |
| HflC protein                                                                                                                         | 2516 | 1681043 | 1682023 | 223.4693878 | 195.594898 | 0.87526 |
| HflK protein                                                                                                                         | 2515 | 1682023 | 1682994 | 148.3007209 | 181.11689  | 1.22128 |
| Antigen, p83/100                                                                                                                     | 2514 | 1683181 | 1684755 | 218.5514612 | 218.14136  | 0.99812 |
| glycosyl hydrolase, family 9                                                                                                         | 2513 | 1684868 | 1687237 | 23.6386661  | 24.7452512 | 1.04681 |
| Putative translation initiation inhibitor, yjgF family                                                                               | 2512 | 1687247 | 1687708 | 21.69197397 | 16.1475054 | 0.7444  |
| NdaD D-aminoacylase                                                                                                                  | 2511 | 1687745 | 1689349 | 31.17206983 | 22.6243766 | 0.72579 |
| low-specificity D-threonine aldolase                                                                                                 | 2510 | 1689354 | 1690469 | 25.11210762 | 21.6977578 | 0.86404 |
| N-Acetyl-D-glucosamine ABC transport system, permease protein 2                                                                      | 2509 | 1690473 | 1691330 | 18.6697783  | 17.3722287 | 0.9305  |
| Sugar ABC transporter permease                                                                                                       | 2508 | 1691332 | 1692267 | 22.45989305 | 15.9229947 | 0.70895 |
| Sugar ABC transporter, sugar-binding protein                                                                                         | 2507 | 1692348 | 1693622 | 153.0612245 | 170.908163 | 1.1166  |
| putative DNA-binding protein                                                                                                         | 2506 | 1693851 | 1694534 | 111.2737921 | 126.700586 | 1.13864 |
| Ribonuclease Z (EC 3.1.26.11)                                                                                                        | 2505 | 1694647 | 1695573 | 260.2591793 | 281.360691 | 1.08108 |
| ABC-type multidrug transport system, ATPase component                                                                                | 2504 | 1695592 | 1696623 | 318.1377304 | 351.080989 | 1.10355 |
| gliding motility protein GldF                                                                                                        | 2503 | 1696620 | 1697354 | 130.7901907 | 188.888965 | 1.44421 |
| gliding motility protein GldG                                                                                                        | 2502 | 1697358 | 1698983 | 300.3076923 | 356.166769 | 1.18601 |
| hypothetical protein                                                                                                                 | 2501 | 1698973 | 1699953 | 190.8163265 | 251.614796 | 1.31862 |
| GGDEF domain protein                                                                                                                 | 2500 | 1699955 | 1701130 | 143.8297872 | 148.088085 | 1.02961 |
| COG1355, Predicted dioxygenase                                                                                                       | 2499 | 1701186 | 1702097 | 135.0164654 | 114.397366 | 0.84728 |
| Xylulose kinase (EC 2.7.1.17)                                                                                                        | 2498 | 1702108 | 1703598 | 118.7919463 | 84.9315436 | 0.71496 |
| Xylose isomerase (EC 5.3.1.5)                                                                                                        | 2497 | 1703641 | 1704981 | 212.6865672 | 197.210448 | 0.92724 |
| hypothetical protein                                                                                                                 | 2496 | 1705031 | 1706710 | 28.5884455  | 26.6015485 | 0.9305  |
| Uncharacterized protein TP_0177                                                                                                      | 2495 | 1706703 | 1708271 | 16.58163265 | 30.8584184 | 1.861   |
| hypothetical protein                                                                                                                 | 2494 | 1708273 | 1709193 | 36.95652174 | 79.9016304 | 2.16204 |
| Conserved domain protein                                                                                                             | 2493 | 1709193 | 1711295 | 143.6726927 | 129.703378 | 0.90277 |
| Uncharacterized protein TP_0181                                                                                                      | 2492 | 1711462 | 1711917 | 200         | 126.793407 | 0.63397 |
| Uncharacterized protein TP_0183 precursor                                                                                            | 2491 | 1711933 | 1712754 | 81.60779537 | 75.9360536 | 0.9305  |
| SsrA-binding protein                                                                                                                 | 2490 | 1712849 | 1713310 | 52.06073753 | 78.7190889 | 1.51206 |

|                                                                              |      |         |         |             |            |         |
|------------------------------------------------------------------------------|------|---------|---------|-------------|------------|---------|
| Serine/threonine kinase                                                      | 2489 | 1713307 | 1714875 | 144.7704082 | 172.095026 | 1.18874 |
| Signal peptidase I (EC 3.4.21.89)                                            | 2488 | 1714881 | 1715930 | 158.2459485 | 125.071973 | 0.79036 |
| Signal peptidase I (EC 3.4.21.89)                                            | 2487 | 1715952 | 1716680 | 39.83516484 | 66.4642857 | 1.66848 |
| Similar to coproporphyrinogen III oxidase, oxygen-independent (EC 1.3.99.22) | 2485 | 1716687 | 1717979 | 11.60990712 | 17.2848297 | 1.4888  |
| hypothetical protein                                                         | 2486 | 1717950 | 1718135 | 5.405405405 | 0          | 0       |
| adsorption protein                                                           | 2484 | 1718390 | 1720558 | 7.380073801 | 7.29635609 | 0.98866 |
| Two component transcriptional regulator, LuxR family                         | 2483 | 1720655 | 1721323 | 28.44311377 | 27.8592814 | 0.97947 |
| Sensor histidine kinase                                                      | 2482 | 1721287 | 1722033 | 41.55495979 | 29.9356568 | 0.72039 |
| hypothetical protein                                                         | 2481 | 1722095 | 1722823 | 9.615384615 | 5.11263736 | 0.53171 |
| hypothetical protein                                                         |      | 1722807 | 1722929 | 0           | 0          | #DIV/0! |
| hypothetical protein                                                         | 2479 | 1722933 | 1723937 | 12.94820717 | 11.1215139 | 0.85892 |
| Uncharacterized protein TP_0813                                              | 2478 | 1724613 | 1725620 | 142.999007  | 127.516385 | 0.89173 |
| dCMP deaminase (EC 3.5.4.12); late competence protein comEB                  | 2477 | 1725704 | 1726195 | 199.592668  | 225.51833  | 1.12989 |
| Prolipoprotein diacylglycerol transferase (EC 2.4.99.-)                      | 2476 | 1726593 | 1727387 | 17.63224181 | 9.37531486 | 0.53171 |
| hypothetical protein                                                         | 2475 | 1727849 | 1728280 | 113.6890951 | 90.675174  | 0.79757 |
| hypothetical protein                                                         | 2474 | 1728326 | 1728898 | 145.1048951 | 95.9781469 | 0.66144 |
| hypothetical protein                                                         | 2473 | 1728895 | 1729044 | 67.11409396 | 37.4697987 | 0.5583  |
| hypothetical protein                                                         | 2472 | 1729111 | 1729413 | 16.55629139 | 9.24337748 | 0.5583  |
| Adenylate cyclase (EC 4.6.1.1)                                               | 2471 | 1729727 | 1730470 | 13.4589502  | 21.2900404 | 1.58185 |
| LysM domain/M23/M37 peptidase domain protein                                 | 2470 | 1730572 | 1731486 | 149.8905908 | 166.960613 | 1.11388 |
| RNA polymerase sigma factor RpoD                                             | 2469 | 1731553 | 1732626 | 188.1467545 | 161.940263 | 0.86071 |
| DNA mismatch repair protein MutL                                             | 2468 | 1732628 | 1734586 | 79.67313585 | 125.460674 | 1.57469 |
| Exodeoxyribonuclease VII small subunit (EC 3.1.11.6)                         | 2467 | 1734586 | 1734819 | 304.72103   | 227.633047 | 0.74702 |
| Exodeoxyribonuclease VII large subunit (EC 3.1.11.6)                         | 2466 | 1734831 | 1736198 | 98.02487198 | 88.4893928 | 0.90272 |
| Uncharacterized protein TP_0285                                              | 2465 | 1736257 | 1737822 | 54.95207668 | 56.4840256 | 1.02788 |
| hypothetical protein                                                         | 2464 | 1737797 | 1738933 | 64.26056338 | 65.528169  | 1.01973 |
| N-Acetylneuraminate cytidyltransferase (EC 2.7.7.43)                         | 2463 | 1738930 | 1739691 | 81.4717477  | 83.1458607 | 1.02055 |
| Ubiquinone biosynthesis SAM-dependent O-methyltransferase (EC 2.1.1.-)       |      | 1739688 | 1741652 | 45.82484725 | 40.7449084 | 0.88914 |
| Carbamoyl-phosphate synthase large chain (EC 6.3.5.5)                        | 2461 | 1741622 | 1743259 | 56.20036652 | 60.2522908 | 1.0721  |
| N-acetylmuramoyl-L-alanine amidase                                           | 2460 | 1743256 | 1744485 | 70.78925956 | 81.7689178 | 1.1551  |
| hypothetical protein                                                         | 2459 | 1744482 | 1745054 | 412.5874126 | 281.427448 | 0.6821  |
| Flagellar filament outer layer protein precursor (Sheath protein)            | 2458 | 1745135 | 1746157 | 3733.855186 | 3945.06507 | 1.05657 |
| GTP pyrophosphokinase                                                        | 2457 | 1746254 | 1747513 | 107.2279587 | 95.3411438 | 0.88914 |
| Intergenic (Expressed, possible tmRNA)                                       |      | 1747514 | 1748178 | 29521.08434 | 28409.6785 | 0.96235 |
| Response regulator                                                           | 2456 | 1748179 | 1749240 | 672.3809524 | 611.471429 | 0.90941 |
| Multi-sensor hybrid histidine kinase precursor                               | 2455 | 1749230 | 1749601 | 517.5202156 | 574.351752 | 1.10982 |
| NAD-dependent glyceraldehyde-3-phosphate dehydrogenase (EC 1.2.1.12)         | 2454 | 1749805 | 1750863 | 1463.298379 | 1844.14633 | 1.26027 |
| Phosphoglycerate kinase (EC 2.7.2.3)                                         | 2453 | 1750940 | 1752202 | 298.7951807 | 341.557028 | 1.14311 |
| Triosephosphate isomerase (EC 5.3.1.1)                                       | 2452 | 1752320 | 1753072 | 344.4148936 | 418.230053 | 1.21432 |

|                                                                                           |      |         |         |             |            |         |
|-------------------------------------------------------------------------------------------|------|---------|---------|-------------|------------|---------|
| Sensory box histidine kinase/response regulator                                           | 2451 | 1753128 | 1755923 | 105.5456172 | 95.8797853 | 0.90842 |
| Citrate synthase (si) (EC 2.3.3.1)                                                        | 2450 | 1756102 | 1757445 | 61.05733433 | 80.3708116 | 1.31632 |
| DinB family protein                                                                       | 2449 | 1757540 | 1758055 | 1.941747573 | 0          | 0       |
| hypothetical protein                                                                      |      | 1758106 | 1758231 | 128         | 74.44      | 0.58156 |
| Translation elongation factor G-related protein                                           | 2447 | 1758246 | 1760333 | 138.4762817 | 89.6169142 | 0.64716 |
| SJCHGC01885 protein                                                                       | 2446 | 1760402 | 1761556 | 183.7088388 | 108.04766  | 0.58815 |
| Topoisomerase IV subunit B (EC 5.99.1.-)                                                  | 2445 | 1761618 | 1763690 | 283.0917874 | 169.018357 | 0.59704 |
| Pyrophosphate-energized proton pump (EC 3.6.1.1)                                          | 2444 | 1763765 | 1765882 | 195.0873878 | 141.970477 | 0.72773 |
| D-glycerate transporter (predicted)                                                       | 2443 | 1765962 | 1767353 | 148.0948958 | 152.519051 | 1.02987 |
| Topoisomerase IV subunit A (EC 5.99.1.-)                                                  | 2442 | 1767503 | 1769419 | 125.2609603 | 114.127088 | 0.91111 |
| Glycine N-methyltransferase (EC 2.1.1.20)                                                 | 2441 | 1769420 | 1770199 | 44.92939666 | 44.1957638 | 0.98367 |
| hypothetical protein                                                                      | 2440 | 1770337 | 1770753 | 74.51923077 | 31.3149038 | 0.42023 |
| hypothetical protein                                                                      | 2439 | 1770750 | 1771997 | 37.6904571  | 25.3704892 | 0.67313 |
| hypothetical protein                                                                      | 2438 | 1772025 | 1772750 | 111.7241379 | 64.1724138 | 0.57438 |
| Large repetitive protein                                                                  | 2437 | 1772725 | 1773690 | 84.97409326 | 60.7476684 | 0.7149  |
| Outer membrane autotransporter barrel                                                     | 2436 | 1773710 | 1777471 | 82.424887   | 56.903749  | 0.69037 |
| Adenylate cyclase (EC 4.6.1.1)                                                            | 2435 | 1777638 | 1780277 | 60.25009473 | 41.2536946 | 0.68471 |
| 2,3-bisphosphoglycerate-independent phosphoglycerate mutase (EC 5.4.2.1)                  | 2434 | 1780316 | 1781971 | 439.8064126 | 392.915306 | 0.89338 |
| Dipeptide-binding ABC transporter, periplasmic substrate-binding component (TC 3.A.1.5.2) | 2433 | 1782155 | 1783702 | 471.2346477 | 562.991597 | 1.19472 |
| Dipeptide-binding ABC transporter, periplasmic substrate-binding component (TC 3.A.1.5.2) | 2432 | 1783746 | 1785296 | 196.1290323 | 209.512581 | 1.06824 |
| Dipeptide transport system permease protein dppB (TC 3.A.1.5.2)                           | 2431 | 1785388 | 1786329 | 39.31987248 | 49.4420829 | 1.25743 |
| Dipeptide transport system permease protein dppC (TC 3.A.1.5.2)                           | 2430 | 1786340 | 1787212 | 43.57798165 | 43.7505734 | 1.00396 |
| Oligopeptide transport ATP-binding protein oppD (TC 3.A.1.5.1)                            | 2429 | 1787214 | 1788230 | 62.00787402 | 50.3715551 | 0.81234 |
| Oligopeptide transport ATP-binding protein oppF (TC 3.A.1.5.1)                            | 2428 | 1788227 | 1789246 | 58.88125613 | 73.9651619 | 1.25618 |
| Deblocking aminopeptidase (EC 3.4.11.-)                                                   | 2427 | 1789236 | 1790291 | 33.17535545 | 50.2734597 | 1.51539 |
| Endoglucanase M (EC 3.2.1.4)                                                              | 2426 | 1790293 | 1791318 | 34.14634146 | 32.6809756 | 0.95709 |
| hypothetical protein                                                                      | 2425 | 1791446 | 1792606 | 134.4827586 | 144.387931 | 1.07365 |
| Sensory box histidine kinase/response regulator                                           |      | 1792616 | 1794826 | 180.9954751 | 199.152262 | 1.10032 |
| ATPase, AAA family                                                                        | 2423 | 1794834 | 1797158 | 84.3373494  | 96.8937177 | 1.14888 |
| hypothetical protein                                                                      | 2422 | 1797189 | 1798400 | 169.2815855 | 132.928571 | 0.78525 |
| Uncharacterized protein TP_0126                                                           | 2421 | 1798415 | 1799047 | 180.3797468 | 136.924842 | 0.75909 |
| Uncharacterized protein TP_0788                                                           | 2420 | 1799148 | 1799939 | 70.79646018 | 59.994311  | 0.84742 |
| hypothetical protein                                                                      | 2419 | 1800027 | 1800380 | 84.98583569 | 47.4475921 | 0.5583  |
| Chorismate mutase II (EC 5.4.99.5)                                                        | 2418 | 1800377 | 1800748 | 24.25876011 | 27.5889488 | 1.13728 |
| hypothetical protein                                                                      | 2416 | 1801053 | 1801901 | 201.6509434 | 126.18809  | 0.62577 |
| Ribosomal large subunit pseudouridine synthase D (EC 4.2.1.70)                            | 2415 | 1801909 | 1802742 | 44.41776711 | 73.72509   | 1.65981 |
| UDP-N-acetylmuramate--alanine ligase (EC 6.3.2.8)                                         | 2414 | 1802780 | 1804234 | 110.7290234 | 131.191541 | 1.1848  |
| Protein yicC                                                                              | 2413 | 1804231 | 1805097 | 189.3764434 | 110.671478 | 0.5844  |
| Cytidylate kinase (EC 2.7.4.14)                                                           | 2412 | 1805094 | 1805627 | 99.43714822 | 109.984053 | 1.10607 |
| A/G-specific adenine glycosylase (EC 3.2.2.-)                                             | 2411 | 1805629 | 1806438 | 56.86032138 | 63.2601978 | 1.11255 |

|                                                                                          |      |         |         |             |            |         |
|------------------------------------------------------------------------------------------|------|---------|---------|-------------|------------|---------|
| hypothetical protein                                                                     | 2409 | 1806648 | 1807424 | 81.18556701 | 61.1539948 | 0.75326 |
| Undecaprenyl-phosphate                                                                   |      |         |         |             |            |         |
| galactosephosphotransferase (EC 2.7.8.6)                                                 | 2408 | 1807428 | 1808969 | 61.64828034 | 47.0986372 | 0.76399 |
| hypothetical protein                                                                     | 2407 | 1808960 | 1810663 | 59.30710511 | 50.8141515 | 0.8568  |
| hypothetical protein                                                                     | 2406 | 1810687 | 1812552 | 141.5549598 | 122.736193 | 0.86706 |
| Glycosyltransferase                                                                      | 2405 | 1812554 | 1813651 | 54.6946217  | 45.8040109 | 0.83745 |
| Oxal/YidC membrane insertion protein                                                     | 2404 | 1813661 | 1816354 | 5.941329372 | 2.76420349 | 0.46525 |
| Oxal/YidC membrane insertion protein                                                     | 2403 | 1816366 | 1819089 | 5.508630187 | 4.442343   | 0.80643 |
| Oxal/YidC membrane insertion protein                                                     | 2402 | 1819105 | 1821828 | 8.446566287 | 6.15093647 | 0.72822 |
| Glycosyltransferase                                                                      | 2401 | 1821825 | 1822793 | 19.62809917 | 17.302686  | 0.88153 |
| putative bifunctional polymerase                                                         | 2400 | 1822889 | 1824115 | 69.33115824 | 44.0203915 | 0.63493 |
| Oxal/YidC membrane insertion protein                                                     | 2399 | 1824112 | 1826802 | 24.16356877 | 10.3773234 | 0.42946 |
| Mannose-1-phosphate guanylyltransferase (EC 2.7.7.13 ) / Phosphomannomutase (EC 5.4.2.8) | 2398 | 1826796 | 1828103 | 52.02754399 | 35.5967865 | 0.68419 |
| Phosphoheptose isomerase (EC 5.-.-.-)                                                    | 2397 | 1828100 | 1828732 | 128.164557  | 101.589399 | 0.79265 |
| D,D-heptose 7-phosphate kinase                                                           | 2396 | 1828711 | 1829745 | 51.25725338 | 19.7978723 | 0.38625 |
| Glycosyltransferase                                                                      | 2395 | 1829781 | 1830842 | 24.50518379 | 21.9250707 | 0.89471 |
| hypothetical protein                                                                     | 2394 | 1830842 | 1831828 | 26.36916836 | 23.5927992 | 0.89471 |
| Glycosyltransferase                                                                      | 2393 | 1831825 | 1833033 | 22.35099338 | 21.5678808 | 0.96496 |
| transposase, mutator family                                                              | 2392 | 1833068 | 1834282 | 55.50660793 | 43.4506608 | 0.7828  |
| Beta-1,3-galactosyltransferase / Beta-1,4-galactosyltransferase                          | 2391 | 1834294 | 1835361 | 14.05810684 | 10.4648547 | 0.7444  |
| Conserved domain protein                                                                 | 2390 | 1835374 | 1836393 | 5.888125613 | 3.65260059 | 0.62033 |
| Glycosyl transferase, family 2                                                           | 2389 | 1836405 | 1837325 | 54.34782609 | 14.1597826 | 0.26054 |
| GDP-L-fucose synthetase (EC 1.1.1.271)                                                   | 2388 | 1837331 | 1838317 | 122.7180527 | 83.0466531 | 0.67673 |
| GDP-mannose 4,6 dehydratase (EC 4.2.1.47)                                                | 2387 | 1838283 | 1839368 | 238.7096774 | 180.096774 | 0.75446 |
| dTDP-glucose 4,6-dehydratase (EC 4.2.1.46)                                               | 2386 | 1839385 | 1840347 | 182.952183  | 137.350312 | 0.75074 |
| dTDP-glucose 4,6-dehydratase (EC 4.2.1.46)                                               | 2385 | 1840375 | 1841496 | 90.99018733 | 80.5160571 | 0.88489 |
| dTDP-4-dehydrorhamnose reductase (EC 1.1.1.133)                                          | 2384 | 1841451 | 1842338 | 90.19165727 | 91.2666291 | 1.01192 |
| dTDP-4-dehydrorhamnose 3,5-epimerase (EC 5.1.3.13)                                       | 2383 | 1842335 | 1842868 | 46.9043152  | 31.424015  | 0.66996 |
| Glucose-1-phosphate thymidyltransferase (EC 2.7.7.24)                                    | 2382 | 1842868 | 1843743 | 40          | 36.1565714 | 0.90391 |
| HlpA protein                                                                             | 2381 | 1843751 | 1845331 | 13.29113924 | 8.83386076 | 0.66464 |
| Glycosyl transferase, group 2 family protein                                             | 2380 | 1845376 | 1846272 | 14.50892857 | 5.19252232 | 0.35788 |
| hypothetical protein                                                                     | 2379 | 1846281 | 1847135 | 0           | 1.08957845 | #DIV/0! |
| Acetyltransferase, CYSE/LACA/LPXA/NODL family                                            | 2378 | 1847449 | 1849179 | 4.046242775 | 4.30289017 | 1.06343 |
| UDP-glucose 4-epimerase (EC 5.1.3.2)                                                     | 2377 | 1849274 | 1850128 | 5.854800937 | 0          | 0       |
| dTDP-4-dehydrorhamnose 3,5-epimerase (EC 5.1.3.13)                                       | 2376 | 1850131 | 1850670 | 16.69758813 | 12.0844156 | 0.72372 |
| CDP-4-dehydro-6-deoxy-D-glucose 3-dehydratase (EC 4.2.1.-)                               | 2375 | 1850748 | 1852085 | 62.82722513 | 60.5486163 | 0.96373 |
| Similar to CDP-glucose 4,6-dehydratase (EC 4.2.1.45)                                     | 2374 | 1852078 | 1853151 | 91.33271202 | 106.664958 | 1.16787 |
| Glucose-1-phosphate cytidyltransferase (EC 2.7.7.33)                                     | 2373 | 1853127 | 1853909 | 34.52685422 | 24.9878517 | 0.72372 |
| Alpha-1,2-fucosyltransferase                                                             | 2372 | 1853911 | 1854726 | 9.81595092  | 9.13374233 | 0.9305  |
| Polysaccharide ABC transporter, ATP-binding protein                                      | 2371 | 1854739 | 1856019 | 130.46875   | 97.4117188 | 0.74663 |

|                                                                             |      |         |         |             |            |         |
|-----------------------------------------------------------------------------|------|---------|---------|-------------|------------|---------|
| hypothetical protein                                                        | 2370 | 1856133 | 1857794 | 71.6435882  | 57.140879  | 0.79757 |
| O-antigen export system, permease protein                                   | 2369 | 1857784 | 1858629 | 56.80473373 | 78.1840237 | 1.37636 |
| UDP-glucuronate 5'-epimerase (EC 5.1.3.12)                                  | 2368 | 1858622 | 1859689 | 129.3345829 | 117.729616 | 0.91027 |
| UDP-glucose dehydrogenase (EC 1.1.1.22)                                     | 2367 | 1859697 | 1861028 | 185.5747558 | 148.208866 | 0.79865 |
| 2-aminoethylphosphonate:pyruvate aminotransferase (EC 2.6.1.37)             | 2366 | 1861032 | 1862846 | 243.660419  | 219.031698 | 0.89892 |
| Phosphonopyruvate decarboxylase (EC 4.1.1.82)                               | 2365 | 1862860 | 1863981 | 113.2917038 | 104.587868 | 0.92317 |
| Phosphoenolpyruvate phosphomutase (EC 5.4.2.9)                              | 2364 | 1863986 | 1865284 | 293.5285054 | 251.622111 | 0.85723 |
| hypothetical protein                                                        | 2363 | 1865294 | 1866925 | 82.77130595 | 94.1339669 | 1.13728 |
| 3-dehydroquininate synthase (EC 4.2.3.4)                                    | 2362 | 1866922 | 1868055 | 222.4183583 | 284.981024 | 1.28128 |
| Transcriptional regulator, marR family                                      | 2361 | 1868067 | 1868645 | 164.3598616 | 149.717128 | 0.91091 |
| Xanthine dehydrogenase, FAD binding subunit (EC 1.17.1.4)                   |      | 1868857 | 1869696 | 65.55423123 | 95.3790226 | 1.45496 |
| Xanthine dehydrogenase iron-sulfur subunit (EC 1.17.1.4)                    | 2359 | 1869680 | 1870165 | 171.1340206 | 143.891753 | 0.84081 |
| Xanthine dehydrogenase, molybdenum binding subunit (EC 1.17.1.4)            | 2358 | 1870162 | 1872252 | 181.8181818 | 207.91555  | 1.14354 |
| UDP-4-amino-4-deoxy-L-arabinose--oxoglutarate aminotransferase (EC 2.6.1.-) | 2357 | 1872272 | 1873522 | 240.8       | 272.4504   | 1.13144 |
| UDP-N-acetylglucosamine 4,6-dehydratase (EC 4.2.1.-)                        | 2356 | 1873512 | 1875050 | 271.7815345 | 278.907997 | 1.02622 |
| Transcription antitermination protein NusG                                  | 2355 | 1875071 | 1875613 | 302.5830258 | 135.626384 | 0.44823 |
| hypothetical protein                                                        | 2354 | 1875713 | 1876216 | 230.6163022 | 149.841948 | 0.64975 |
| extensin-like protein                                                       | 2353 | 1876231 | 1877463 | 228.8961039 | 236.40138  | 1.03279 |
| Protein export cytoplasm protein SecA ATPase                                |      |         |         |             |            |         |
| RNA helicase (TC 3.A.5.1.1)                                                 | 2352 | 1877578 | 1880358 | 242.0289855 | 253.190399 | 1.04612 |
| lipoprotein, putative                                                       | 2351 | 1880479 | 1881681 | 216.3061564 | 174.178453 | 0.80524 |
| hypothetical protein                                                        | 2350 | 1881706 | 1882284 | 200.6920415 | 173.865052 | 0.86633 |
| Uncharacterized protein TP_0070                                             | 2349 | 1882578 | 1882988 | 273.1707317 | 260.993902 | 0.95542 |
| Mutator mutT protein (7,8-dihydro-8-oxoguanine-triphosphatase) (EC 3.6.1.-) | 2347 | 1883010 | 1883387 | 137.9310345 | 64.1724138 | 0.46525 |
| Outer membrane protease E precursor (EC 3.4.23.-)                           | 2348 | 1883380 | 1884417 | 54.96624879 | 49.3514947 | 0.89785 |
| hypothetical protein                                                        | 2346 | 1884469 | 1884810 | 155.4252199 | 106.420821 | 0.68471 |
| Cell surface protein                                                        | 2345 | 1884921 | 1886639 | 8.731082654 | 5.41618161 | 0.62033 |
| RecA protein                                                                | 2344 | 1886725 | 1888125 | 238.5714286 | 279.814643 | 1.17288 |
| N-acyl-L-amino acid amidohydrolase (EC 3.5.1.14)                            | 2343 | 1888139 | 1889362 | 236.3041701 | 215.316026 | 0.91118 |
| Segregation and condensation protein A                                      | 2342 | 1889450 | 1890253 | 196.762142  | 219.00934  | 1.11307 |
| Segregation and condensation protein B                                      | 2341 | 1890253 | 1890798 | 155.9633028 | 143.416514 | 0.91955 |
| Ribosomal large subunit pseudouridine synthase B (EC 5.4.99.-)              | 2340 | 1890782 | 1891624 | 175.7719715 | 171.291568 | 0.97451 |
| SSU ribosomal protein S1p                                                   | 2339 | 1891608 | 1894004 | 910.041841  | 726.490795 | 0.7983  |
| Periplasmic [Fe] hydrogenase (EC 1.12.7.2)                                  | 2338 | 1894030 | 1895544 | 316.9107856 | 234.793276 | 0.74088 |
| TPR repeat-containing protein TP_0282                                       | 2337 | 1895547 | 1896236 | 156.7489115 | 152.607402 | 0.97358 |
| hypothetical protein                                                        | 2336 | 1896239 | 1897030 | 53.09734513 | 63.5233881 | 1.19636 |
| hypothetical protein                                                        | 2335 | 1897020 | 1897175 | 6.451612903 | 0          | 0       |
| Methionine ABC transporter ATP-binding protein                              | 2334 | 1897221 | 1898291 | 15.88785047 | 9.56588785 | 0.60209 |
| Methionine ABC transporter permease protein                                 | 2333 | 1898288 | 1898968 | 13.23529412 | 23.2625    | 1.75761 |



|                                                                                                       |      |         |         |             |            |         |
|-------------------------------------------------------------------------------------------------------|------|---------|---------|-------------|------------|---------|
| Methionine ABC transporter substrate-binding protein                                                  | 2332 | 1898985 | 1899845 | 53.48837209 | 73.5744186 | 1.37552 |
| N-acetyl-L,L-diaminopimelate deacetylase (EC 3.5.1.47)                                                | 2331 | 1899858 | 1901012 | 32.06239168 | 22.5771231 | 0.70416 |
| Fe-S oxidoreductase (EC 1.8.-.-)                                                                      | 2330 | 1901017 | 1903467 | 42.85714286 | 39.1189796 | 0.91278 |
| Rod shape-determining protein rodA                                                                    | 2329 | 1903469 | 1904779 | 41.98473282 | 23.4400763 | 0.5583  |
| Cell division protein ftsI [Peptidoglycan synthetase] (EC 2.4.1.129)                                  | 2328 | 1904776 | 1906653 | 91.73333333 | 74.9362667 | 0.81689 |
| Rod shape-determining protein mreD                                                                    | 2327 | 1906653 | 1907156 | 57.65407555 | 36.9980119 | 0.64172 |
| Rod shape-determining protein mreC                                                                    | 2326 | 1907149 | 1908039 | 82.02247191 | 60.6393258 | 0.7393  |
| Rod shape-determining protein mreB                                                                    | 2325 | 1908058 | 1909083 | 365.6862745 | 280.062255 | 0.76585 |
| TPR domain protein                                                                                    | 2324 | 1909093 | 1910043 | 196.8421053 | 175.325789 | 0.89069 |
| INTERGENIC (Expressed possible RNaseP) hypothetical protein                                           | 2322 | 1910044 | 1910503 | 847.4945534 | 539.244009 | 0.63628 |
| Zn-ribbon protein, possibly nucleic acid-binding                                                      | 2323 | 1910504 | 1910851 | 3787.234043 | 2327.66413 | 0.61461 |
| RNA polymerase sigma factor RpoD                                                                      | 2323 | 1910839 | 1911681 | 758.9073634 | 443.147862 | 0.58393 |
| DNA primase (EC 2.7.7.-)                                                                              | 2321 | 1911803 | 1913572 | 182.5890334 | 134.656868 | 0.73749 |
| COG1559 protein yceG like                                                                             | 2320 | 1913569 | 1915473 | 162.289916  | 125.597952 | 0.77391 |
| COG1559 protein yceG like                                                                             | 2319 | 1915473 | 1916573 | 170.9090909 | 158.185    | 0.92555 |
| Metal-dependent hydrolases of the beta-lactamase superfamily I hypothetical protein                   | 2318 | 1916576 | 1917517 | 91.78228388 | 81.4311633 | 0.88722 |
| Membrane spanning protein                                                                             | 2317 | 1917517 | 1917984 | 137.0449679 | 109.587794 | 0.79965 |
| Nitrogen regulatory protein P-II                                                                      | 2316 | 1918157 | 1919716 | 132.7774214 | 124.743105 | 0.93949 |
| hypothetical protein                                                                                  | 2315 | 1919709 | 1920482 | 197.9301423 | 140.838939 | 0.71156 |
| DNA-3-methyladenine glycosylase II (EC 3.2.2.21)                                                      |      | 1920566 | 1920739 | 34.68208092 | 16.1358382 | 0.46525 |
| ADA regulatory protein                                                                                | 2313 | 1920728 | 1921378 | 47.69230769 | 27.1992308 | 0.57031 |
| Methylated-DNA--protein-cysteine methyltransferase (EC 2.1.1.63)                                      | 2312 | 1921375 | 1921941 | 21.20141343 | 14.7959364 | 0.69788 |
| putative lipoprotein                                                                                  | 2311 | 1921919 | 1922434 | 40.77669903 | 21.6815534 | 0.53171 |
|                                                                                                       | 2310 | 1922427 | 1923326 | 73.41490545 | 50.7169077 | 0.69083 |
| diguanylate cyclase/phosphodiesterase (GGDEF & EAL domains) with PAS/PAC sensor(s)                    | 2309 | 1923383 | 1924819 | 53.62116992 | 47.3025766 | 0.88216 |
| DNA-directed RNA polymerase specialized sigma subunit, sigma24 homolog                                | 2308 | 1924923 | 1925342 | 4.77326969  | 22.2076372 | 4.6525  |
| ABC-type multidrug transport system, permease component                                               | 2307 | 1925490 | 1926290 | 8.75        | 18.61      | 2.12686 |
| Daunorubicin resistance ATP-binding protein                                                           | 2306 | 1926287 | 1927057 | 16.88311688 | 16.9181818 | 1.00208 |
| hypothetical protein                                                                                  | 2305 | 1927054 | 1927443 | 17.99485861 | 28.7043702 | 1.59514 |
| hypothetical protein                                                                                  | 2304 | 1927527 | 1927649 | 0           | 0          | #DIV/0! |
| Glycerol-3-phosphate ABC transporter, periplasmic glycerol-3-phosphate-binding protein (TC 3.A.1.1.3) | 2303 | 1927791 | 1929104 | 16.75552171 | 21.2604722 | 1.26886 |
| Transcriptional regulator, LuxR family                                                                | 2302 | 1929117 | 1930469 | 6.656804734 | 4.12943787 | 0.62033 |
| sensory box histidine kinase/response regulator                                                       | 2301 | 1930624 | 1933788 | 6.977481763 | 5.60719949 | 0.80361 |
| Two-component response regulator                                                                      | 2300 | 1933867 | 1934538 | 2.980625931 | 6.93368107 | 2.32625 |
| probable adhesin                                                                                      | 2299 | 1934703 | 1936628 | 22.85714286 | 25.1355844 | 1.09968 |
| hypothetical protein                                                                                  | 2298 | 1936666 | 1937145 | 20.87682672 | 33.0240084 | 1.58185 |
| hypothetical protein                                                                                  | 2297 | 1937142 | 1938341 | 24.18682235 | 33.3707256 | 1.37971 |
| hypothetical protein                                                                                  | 2296 | 1938354 | 1939061 | 19.8019802  | 34.2192362 | 1.72807 |
| hypothetical protein                                                                                  | 2295 | 1939151 | 1940137 | 4.056795132 | 1.88742394 | 0.46525 |



|                                                                                       |      |         |         |             |            |         |
|---------------------------------------------------------------------------------------|------|---------|---------|-------------|------------|---------|
| Halomucin precursor                                                                   |      | 1940097 | 1942580 | 2.013693113 | 1.49899315 | 0.7444  |
| hypothetical protein                                                                  | 2293 | 1942558 | 1942677 | 0           | 0          | #DIV/0! |
| Cell surface protein                                                                  | 2292 | 1942852 | 1944453 | 3.123048095 | 2.324797   | 0.7444  |
| Calcium-binding acidic-repeat protein precursor                                       | 2291 | 1944450 | 1946159 | 1.170275015 | 2.1778818  | 1.861   |
| ATP-dependent DNA helicase recG (EC 3.6.1.-)                                          | 2290 | 1946382 | 1946690 | 9.74025974  | 0          | 0       |
| hypothetical protein                                                                  | 2289 | 1946660 | 1946830 | 0           | 5.47352941 | #DIV/0! |
| hypothetical protein                                                                  | 2288 | 1947229 | 1947405 | 0           | 7.56504065 | #DIV/0! |
| hypothetical protein                                                                  |      | 1947425 | 1947625 | 35          | 18.61      | 0.53171 |
| hypothetical protein                                                                  | 2286 | 1947809 | 1948873 | 7.518796992 | 7.87077068 | 1.04681 |
| some similarities to hypothetical proteins                                            | 2285 | 1948866 | 1950875 | 22.89696366 | 7.87381782 | 0.34388 |
| hypothetical protein                                                                  | 2284 | 1950800 | 1951021 | 0           | 0          | #DIV/0! |
| Type I restriction-modification system, DNA-methyltransferase subunit M (EC 2.1.1.72) | 2283 | 1951205 | 1952773 | 50.38265306 | 35.6058673 | 0.70671 |
| type I restriction-modification system, M subunit (EC 2.1.1.72)                       | 2282 | 1952760 | 1953902 | 16.63747811 | 7.33318739 | 0.44076 |
| Putative DNA-binding protein                                                          | 2281 | 1953899 | 1954774 | 19.42857143 | 12.7611429 | 0.65682 |
| Type I restriction-modification system, restriction subunit R (EC 3.1.21.3)           | 2280 | 1954771 | 1958007 | 13.90605686 | 10.0641224 | 0.72372 |
| ATPase involved in DNA repair                                                         | 2279 | 1958000 | 1960852 | 2.805049088 | 0.97878682 | 0.34894 |
| hypothetical protein                                                                  | 2278 | 1960885 | 1962576 | 11.82732111 | 5.50266115 | 0.46525 |
| hypothetical protein                                                                  |      | 1962581 | 1962709 | 31.25       | 14.5390625 | 0.46525 |
| ATP-dependent DNA helicase                                                            |      | 1962714 | 1962950 | 19.60784314 | 13.6838235 | 0.69788 |
| ATP-dependent DNA helicase                                                            |      | 1962951 | 1964027 | 12.78409091 | 7.93039773 | 0.62033 |
| hypothetical protein                                                                  | 2275 | 1964019 | 1964252 | 13.21585903 | 0          | 0       |
| putative cytoplasmic protein                                                          | 2273 | 1964275 | 1965606 | 2.253944403 | 0          | 0       |
| ATPase                                                                                | 2271 | 1965740 | 1965997 | 0           | 0          | #DIV/0! |
| hypothetical protein                                                                  | 2272 | 1965994 | 1966125 | 0           | 0          | #DIV/0! |
| hypothetical protein                                                                  |      | 1966524 | 1967507 | 1.017293998 | 1.89318413 | 1.861   |
| hypothetical protein                                                                  |      | 1967526 | 1971092 | 0.280426248 | 0          | 0       |
| transposase, mutator family                                                           | 2268 | 1971114 | 1972328 | 42.17926186 | 44.1537786 | 1.04681 |
| hypothetical protein                                                                  | 2267 | 1972618 | 1972737 | 25.21008403 | 0          | 0       |
| hypothetical protein                                                                  | 2266 | 1973172 | 1973393 | 0           | 0          | #DIV/0! |
| hypothetical protein                                                                  |      | 1973490 | 1974191 | 7.235890014 | 4.0397974  | 0.5583  |
| hypothetical protein                                                                  | 2264 | 1974955 | 1975176 | 9.049773756 | 0          | 0       |
| putative DNA primase/helicase                                                         | 2263 | 1975443 | 1976879 | 0.69637883  | 1.9439415  | 2.7915  |
| hypothetical protein                                                                  | 2262 | 1976879 | 1977214 | 0           | 0          | #DIV/0! |
| hypothetical protein                                                                  | 2261 | 1977204 | 1977425 | 0           | 0          | #DIV/0! |
| hypothetical protein                                                                  | 2260 | 1977404 | 1977607 | 0           | 4.58374384 | #DIV/0! |
| hypothetical protein                                                                  | 2259 | 1977682 | 1978347 | 1.503759398 | 1.39924812 | 0.9305  |
| site-specific recombinase, phage integrase family                                     | 2258 | 1978806 | 1980161 | 19.92619926 | 22.6616236 | 1.13728 |
| Pyruvate,phosphate dikinase (EC 2.7.9.1)                                              | 2255 | 1980571 | 1983579 | 602.7306027 | 689.431402 | 1.14385 |
| hypothetical protein                                                                  |      | 1983527 | 1983667 | 0           | 0          | #DIV/0! |
| ATP-dependent helicase                                                                | 2253 | 1983685 | 1986411 | 78.64755605 | 82.4147372 | 1.0479  |
| hypothetical protein                                                                  | 2252 | 1986437 | 1987321 | 93.89140271 | 95.7867647 | 1.02019 |
| hypothetical protein                                                                  | 2251 | 1987378 | 1987521 | 139.8601399 | 52.0559441 | 0.3722  |
| hypothetical protein                                                                  | 2250 | 1987546 | 1988097 | 250.4537205 | 227.980944 | 0.91027 |
| Glucose-6-phosphate isomerase (EC 5.3.1.9)                                            | 2249 | 1988127 | 1989701 | 168.5750636 | 169.881361 | 1.00775 |
| Arginine pathway regulatory protein ArgR, repressor of arg regulon                    | 2248 | 1989782 | 1990255 | 114.1649049 | 64.9186047 | 0.56864 |

|                                                                                                                                    |      |         |         |             |            |         |
|------------------------------------------------------------------------------------------------------------------------------------|------|---------|---------|-------------|------------|---------|
| hypothetical protein                                                                                                               | 2247 | 1990481 | 1991872 | 26.59956866 | 28.0956147 | 1.05624 |
| hypothetical protein                                                                                                               | 2246 | 1991844 | 1991969 | 0           | 0          | #DIV/0! |
| TM2 domain protein                                                                                                                 | 2245 | 1992013 | 1992519 | 106.8548387 | 90.0483871 | 0.84272 |
| Recombination inhibitory protein MutS2                                                                                             | 2244 | 1992523 | 1995207 | 50.67064083 | 63.4431818 | 1.25207 |
| Ribosome small subunit-stimulated GTPase EngC                                                                                      | 2243 | 1995200 | 1996135 | 75.93582888 | 104.494652 | 1.37609 |
| Glutamate racemase (EC 5.1.1.3)                                                                                                    | 2242 | 1996132 | 1997025 | 76.14781635 | 70.8555431 | 0.9305  |
| hypothetical protein                                                                                                               | 2241 | 1997031 | 1997423 | 30.6122449  | 47.4744898 | 1.55083 |
| Pentapeptide repeat family protein                                                                                                 | 2240 | 1997444 | 1998037 | 52.27655987 | 21.9679595 | 0.42023 |
| Hydroxyacylglutathione hydrolase (EC 3.1.2.6)                                                                                      | 2238 | 1998038 | 1998757 | 73.71349096 | 67.2962448 | 0.91294 |
| hypothetical protein                                                                                                               | 2239 | 1998754 | 2000472 | 116.9965076 | 88.8253783 | 0.75921 |
| hypothetical protein                                                                                                               | 2237 | 2000484 | 2001263 | 152.7599487 | 106.308729 | 0.69592 |
| hypothetical protein                                                                                                               | 2236 | 2001335 | 2001994 | 47.04097117 | 40.947648  | 0.87047 |
| hypothetical protein                                                                                                               | 2235 | 2001994 | 2002293 | 16.72240803 | 9.3361204  | 0.5583  |
| hypothetical protein                                                                                                               | 2234 | 2002419 | 2002595 | 39.77272727 | 42.2954545 | 1.06343 |
| putative protein family member (5Q829)                                                                                             | 2233 | 2003059 | 2003910 | 28.20211516 | 25.1486486 | 0.89173 |
| DnaJ-like protein DjlA                                                                                                             | 2232 | 2004164 | 2004745 | 91.22203098 | 75.2728055 | 0.82516 |
| putative lipoprotein                                                                                                               | 2231 | 2004750 | 2006117 | 171.1777615 | 106.867959 | 0.62431 |
| Putative lipoprotein                                                                                                               | 2230 | 2006169 | 2006792 | 520.0642055 | 534.701445 | 1.02815 |
| Response regulator of zinc sigma-54-dependent two-component system                                                                 | 2229 | 2006893 | 2008251 | 67.99704361 | 58.4571323 | 0.8597  |
| Chemotaxis regulator - transmits chemoreceptor signals to flagellar motor components CheY                                          | 2228 | 2008251 | 2009471 | 82.78688525 | 51.8639344 | 0.62648 |
| Drug resistance transporter EmrB/QacA subfamily                                                                                    | 2227 | 2009704 | 2011104 | 28.57142857 | 21.2685714 | 0.7444  |
| Serine phosphatase RsbU, regulator of sigma subunit                                                                                | 2226 | 2011343 | 2011795 | 92.92035398 | 45.289823  | 0.4874  |
| anti-sigma F factor antagonist (spolIIA-2); anti sigma b factor antagonist RsbV                                                    | 2225 | 2011862 | 2012434 | 94.40559441 | 56.9361888 | 0.6031  |
| Serine phosphatase RsbU, regulator of sigma subunit                                                                                | 2224 | 2012460 | 2014028 | 37.62755102 | 25.5175383 | 0.67816 |
| DNA polymerase III delta prime subunit (EC 2.7.7.7)                                                                                | 2223 | 2014041 | 2015408 | 88.51499634 | 113.674835 | 1.28424 |
| Colicin V production protein                                                                                                       | 2222 | 2015401 | 2015901 | 32          | 33.498     | 1.04681 |
| UDP-N-acetylglucosamine--N-acetylmuramyl-(pentapeptide) pyrophosphoryl-undecaprenol N-acetylglucosamine transferase (EC 2.4.1.227) | 2221 | 2015898 | 2017055 | 120.1382887 | 112.592913 | 0.93719 |
| NADPH:quinone oxidoreductase                                                                                                       | 2220 | 2017126 | 2017689 | 65.71936057 | 36.3605684 | 0.55327 |
| hypothetical protein                                                                                                               | 2219 | 2017878 | 2018852 | 268.9938398 | 231.191992 | 0.85947 |
| Uncharacterized protein TP_0454                                                                                                    | 2218 | 2018849 | 2019586 | 107.1913161 | 126.255088 | 1.17785 |
| Putative deoxyribonuclease YjjV                                                                                                    | 2217 | 2019633 | 2020481 | 29.48113208 | 25.2376179 | 0.85606 |
| Streptococcal cysteine protease (Streptopain) (EC 3.4.22.10) / Streptococcal pyrogenic exotoxin B (SpeB)                           | 2216 | 2020559 | 2021995 | 2.78551532  | 1.295961   | 0.46525 |
| Asparaginyl-tRNA synthetase (EC 6.1.1.22)                                                                                          | 2215 | 2022197 | 2023624 | 180.8585503 | 216.745602 | 1.19843 |
| D-alanyl-D-alanine carboxypeptidase (EC 3.4.16.4)                                                                                  | 2214 | 2023630 | 2024949 | 109.9317665 | 162.255497 | 1.47597 |
| hypothetical protein                                                                                                               | 2213 | 2024954 | 2025148 | 293.814433  | 239.819588 | 0.81623 |
| hypothetical protein                                                                                                               | 2212 | 2025198 | 2025323 | 144         | 111.66     | 0.77542 |
| Membrane proteins related to metalloendopeptidases                                                                                 | 2211 | 2025407 | 2026687 | 121.875     | 152.660156 | 1.2526  |

|                                                                                                 |      |         |         |             |            |         |
|-------------------------------------------------------------------------------------------------|------|---------|---------|-------------|------------|---------|
| Signal peptidase I (EC 3.4.21.89)                                                               | 2210 | 2026741 | 2027154 | 46.00484262 | 24.783293  | 0.53871 |
| Cell division protein ftsI [Peptidoglycan synthetase] (EC 2.4.1.129)                            | 2209 | 2027151 | 2029043 | 104.6511628 | 138.689746 | 1.32526 |
| Conserved domain protein                                                                        | 2208 | 2029030 | 2030928 | 23.18229715 | 40.6909905 | 1.75526 |
| hypothetical protein                                                                            |      | 2031008 | 2031145 | 0           | 6.7919708  | #DIV/0! |
| Integrase                                                                                       | 2206 | 2031219 | 2032406 | 27.82462057 | 18.8296796 | 0.67673 |
| hypothetical protein                                                                            |      | 2032504 | 2032671 | 0           | 0          | #DIV/0! |
| hypothetical protein                                                                            | 2204 | 2032661 | 2033203 | 1.84501845  | 0          | 0       |
| hypothetical protein                                                                            | 2203 | 2033446 | 2034636 | 2.521008403 | 1.56386555 | 0.62033 |
| Iron-sulfur cluster-binding protein                                                             |      | 2034900 | 2035307 | 2.457002457 | 2.28624079 | 0.9305  |
| Iron-sulfur cluster-binding protein                                                             |      | 2035460 | 2035759 | 13.37792642 | 9.3361204  | 0.69788 |
| Phage-related protein                                                                           | 2200 | 2036195 | 2037775 | 5.696202532 | 0.58892405 | 0.10339 |
| hypothetical protein                                                                            |      | 2038758 | 2038895 | 0           | 0          | #DIV/0! |
| putative DNA primase/helicase                                                                   | 2198 | 2039179 | 2040573 | 2.896451846 | 4.71650978 | 1.62838 |
| hypothetical protein                                                                            | 2197 | 2040638 | 2040976 | 0           | 0          | #DIV/0! |
| hypothetical protein                                                                            | 2196 | 2040976 | 2041269 | 10.92896175 | 5.08469945 | 0.46525 |
| hypothetical protein                                                                            | 2195 | 2041280 | 2043082 | 1.408450704 | 0.65528169 | 0.46525 |
| hypothetical protein                                                                            | 2194 | 2043079 | 2043630 | 0           | 0          | #DIV/0! |
| hypothetical protein                                                                            | 2193 | 2043631 | 2043912 | 0           | 0          | #DIV/0! |
| hypothetical protein                                                                            | 2192 | 2043872 | 2044159 | 0           | 0          | #DIV/0! |
| hypothetical protein                                                                            | 2191 | 2044152 | 2044418 | 4.975124378 | 4.62935323 | 0.9305  |
| hypothetical protein                                                                            | 2190 | 2044429 | 2044596 | 0           | 0          | #DIV/0! |
| hypothetical protein                                                                            | 2189 | 2044599 | 2045153 | 0           | 0          | #DIV/0! |
| hypothetical protein                                                                            | 2188 | 2045275 | 2045541 | 0           | 0          | #DIV/0! |
| hypothetical protein                                                                            | 2187 | 2045551 | 2047047 | 1.740644038 | 0.80983464 | 0.46525 |
| hypothetical protein                                                                            | 2186 | 2047044 | 2047907 | 3.424657534 | 0          | 0       |
| hypothetical protein                                                                            | 2185 | 2047904 | 2048341 | 0           | 2.19976359 | #DIV/0! |
| hypothetical protein                                                                            | 2184 | 2048338 | 2048946 | 0           | 0          | #DIV/0! |
| hypothetical protein                                                                            | 2183 | 2049061 | 2049213 | 125         | 159.164474 | 1.27332 |
| GCN5-related N-acetyltransferase; Histone acetyltransferase HPA2 and related acetyltransferases | 2182 | 2049217 | 2049771 | 32.49097473 | 50.3880866 | 1.55083 |
| hypothetical protein                                                                            | 2181 | 2050038 | 2050190 | 59.21052632 | 61.2171053 | 1.03389 |
| Transcription regulator of multidrug efflux pump operon, TetR (AcrR) family                     | 2180 | 2050242 | 2050808 | 33.56890459 | 11.5079505 | 0.34282 |
| Ferredoxin                                                                                      | 2179 | 2050893 | 2051714 | 3.65408039  | 1.13337393 | 0.31017 |
| hypothetical protein                                                                            | 2178 | 2051711 | 2052364 | 6.125574273 | 1.42496172 | 0.23263 |
| Dehydrogenases with different specificities (related to short-chain alcohol dehydrogenases)     | 2177 | 2052383 | 2053180 | 2.509410289 | 3.50250941 | 1.39575 |
| transposase, mutator family                                                                     | 2176 | 2053336 | 2054565 | 9.298393914 | 3.93279797 | 0.42295 |
| hypothetical protein                                                                            |      | 2054605 | 2054760 | 0           | 0          | #DIV/0! |
| hypothetical protein                                                                            |      | 2054991 | 2055116 | 0           | 0          | #DIV/0! |
| hypothetical protein                                                                            | 2173 | 2055137 | 2056057 | 7.608695652 | 0          | 0       |
| hypothetical protein                                                                            | 2172 | 2056341 | 2056568 | 4.405286344 | 0          | 0       |
| hypothetical protein                                                                            | 2171 | 2056565 | 2056894 | 18.23708207 | 0          | 0       |
| hypothetical protein                                                                            | 2170 | 2057000 | 2057131 | 0           | 0          | #DIV/0! |
| hypothetical protein                                                                            | 2169 | 2057179 | 2057415 | 4.237288136 | 7.88559322 | 1.861   |
| Fic-1 cell filamentation-like protein                                                           | 2168 | 2057418 | 2058023 | 3.305785124 | 0          | 0       |
| hypothetical protein                                                                            | 2167 | 2058030 | 2058143 | 0           | 0          | #DIV/0! |
| hypothetical protein                                                                            |      | 2058322 | 2059512 | 5.042016807 | 0          | 0       |
| hypothetical protein                                                                            |      | 2059682 | 2059807 | 0           | 0          | #DIV/0! |

|                                                                                            |      |         |         |             |            |         |
|--------------------------------------------------------------------------------------------|------|---------|---------|-------------|------------|---------|
| probable methyltransferase                                                                 | 2164 | 2059780 | 2060406 | 0           | 0          | #DIV/0! |
| hypothetical protein                                                                       | 2163 | 2060695 | 2060835 | 0           | 6.64642857 | #DIV/0! |
| hypothetical protein                                                                       |      | 2060799 | 2061248 | 2.638522427 | 2.45514512 | 0.9305  |
| hypothetical protein                                                                       | 2161 | 2061251 | 2061517 | 5.681818182 | 5.28693182 | 0.9305  |
| Antitoxin of toxin-antitoxin stability system                                              | 2160 | 2061714 | 2061992 | 17.98561151 | 10.0413669 | 0.5583  |
| Plasmid stabilization system protein                                                       | 2159 | 2061994 | 2062329 | 0           | 0          | #DIV/0! |
| transposase, mutator family                                                                | 2158 | 2062418 | 2062540 | 0           | 10.0053763 | #DIV/0! |
| transposase, mutator family                                                                | 2157 | 2062643 | 2063857 | 58.25242718 | 53.3826125 | 0.9164  |
| Putative transposase                                                                       |      | 2063886 | 2064119 | 13.15789474 | 8.1622807  | 0.62033 |
| transposase, mutator family                                                                |      | 2064134 | 2064817 | 8.8365243   | 4.11119293 | 0.46525 |
| hypothetical protein                                                                       | 2154 | 2064988 | 2065221 | 0           | 7.98712446 | #DIV/0! |
| HD domain protein                                                                          | 2153 | 2065544 | 2066710 | 66.03773585 | 64.640223  | 0.97884 |
| Hemolysins and related proteins containing CBS domains                                     | 2152 | 2066715 | 2068064 | 28.2108389  | 23.4870082 | 0.83255 |
| ATP-dependent RNA helicase YfmL                                                            | 2151 | 2068075 | 2069247 | 126.2798635 | 105.594283 | 0.83619 |
| Glycosyltransferase                                                                        |      | 2069258 | 2069551 | 300.3412969 | 203.249147 | 0.67673 |
| Glycosyltransferase                                                                        |      | 2069508 | 2070413 | 175.6906077 | 153.198343 | 0.87198 |
| Proline/sodium symporter PutP (TC 2.A.21.2.1) @                                            |      |         |         |             |            |         |
| Propionate/sodium symporter                                                                | 2148 | 2070559 | 2072022 | 91.28345916 | 109.207618 | 1.19636 |
| Indolepyruvate oxidoreductase, subunit A                                                   | 2147 | 2072103 | 2073776 | 123.501199  | 121.054257 | 0.98019 |
| Indolepyruvate oxidoreductase, subunit B                                                   | 2146 | 2073773 | 2074360 | 136.286201  | 215.584327 | 1.58185 |
| Phenylacetate-coenzyme A ligase (EC 6.2.1.30)                                              | 2145 | 2074357 | 2075703 | 174.7211896 | 206.162825 | 1.17995 |
| hypothetical protein                                                                       |      | 2075840 | 2075953 | 0           | 0          | #DIV/0! |
| Urea carboxylase-related ABC transporter, periplasmic substrate-binding protein            | 2143 | 2076037 | 2077044 | 1.986097319 | 1.84806356 | 0.9305  |
| Radical SAM domain protein                                                                 | 2142 | 2077096 | 2078307 | 0           | 2.30511974 | #DIV/0! |
| Taurine transporter substrate-binding protein                                              | 2141 | 2078351 | 2079358 | 0.993048659 | 0.92403178 | 0.9305  |
| Radical SAM domain protein                                                                 | 2140 | 2079389 | 2080600 | 3.303055326 | 0.76837325 | 0.23263 |
| Radical SAM domain protein                                                                 | 2139 | 2080671 | 2081891 | 3.278688525 | 8.3897541  | 2.55888 |
| L-proline Glycine Betaine ABC transport ATP-binding protein proV (TC 3.A.1.12.1)           | 2138 | 2081888 | 2082724 | 0           | 1.11303828 | #DIV/0! |
| Choline ABC transporter permease protein                                                   | 2137 | 2082740 | 2083507 | 1.303780965 | 0          | 0       |
| Alkanesulfonates-binding protein                                                           | 2136 | 2083545 | 2084576 | 3.879728419 | 3.61008729 | 0.9305  |
| Urea carboxylase-related ABC transporter, periplasmic substrate-binding protein            | 2135 | 2084623 | 2085621 | 3.006012024 | 5.59418838 | 1.861   |
| putative PQQ enzyme repeat                                                                 | 2134 | 2085635 | 2087131 | 4.679144385 | 2.48796791 | 0.53171 |
| putative PQQ enzyme repeat                                                                 | 2133 | 2087143 | 2088540 | 6.442376521 | 8.65891195 | 1.34406 |
| hypothetical protein                                                                       | 2132 | 2088512 | 2088625 | 0           | 0          | #DIV/0! |
| Oligopeptide ABC transporter, periplasmic oligopeptide-binding protein oppA (TC 3.A.1.5.1) | 2131 | 2088643 | 2090208 | 176.3578275 | 151.615016 | 0.8597  |
| Oligopeptide transport system permease protein oppB (TC 3.A.1.5.1)                         | 2130 | 2090230 | 2091183 | 23.08499475 | 39.0556139 | 1.69182 |
| Oligopeptide transport system permease protein oppC (TC 3.A.1.5.1)                         | 2129 | 2091193 | 2092047 | 15.22248244 | 20.7019906 | 1.35996 |
| Oligopeptide transport ATP-binding protein oppD (TC 3.A.1.5.1)                             | 2128 | 2092044 | 2093024 | 22.44897959 | 23.7372449 | 1.05739 |
| Oligopeptide transport ATP-binding protein oppF (TC 3.A.1.5.1)                             | 2127 | 2093021 | 2093992 | 12.35839341 | 20.1240989 | 1.62838 |
| Phenylacetate-coenzyme A ligase (EC 6.2.1.30)                                              | 2126 | 2094088 | 2095389 | 188.5625966 | 225.793663 | 1.19745 |

|                                                                                |      |         |         |             |            |         |
|--------------------------------------------------------------------------------|------|---------|---------|-------------|------------|---------|
| Amino acid-binding ACT                                                         | 2125 | 2095399 | 2095815 | 173.0769231 | 116.3125   | 0.67203 |
| Glycogen synthase, ADP-glucose<br>transglucosylase (EC 2.4.1.21)               | 2124 | 2095892 | 2097373 | 187.0357866 | 227.441594 | 1.21603 |
| Nucleotidyltransferase substrate binding protein,<br>HI0074                    | 2123 | 2097429 | 2097848 | 119.3317422 | 108.817422 | 0.91189 |
| Type I restriction-modification system, specificity<br>subunit S (EC 3.1.21.3) | 2122 | 2097839 | 2098141 | 76.1589404  | 43.1357616 | 0.56639 |
| hypothetical protein                                                           | 2121 | 2098163 | 2099140 | 79.83623337 | 138.098772 | 1.72978 |
| hypothetical protein                                                           | 2120 | 2099451 | 2099777 | 3.067484663 | 2.85429448 | 0.9305  |
| hypothetical protein                                                           | 2119 | 2099859 | 2100074 | 0           | 0          | #DIV/0! |
| hypothetical protein                                                           | 2118 | 2100543 | 2100677 | 0           | 0          | #DIV/0! |
| hypothetical protein                                                           | 2117 | 2100720 | 2100836 | 0           | 0          | #DIV/0! |
| hypothetical protein                                                           |      | 2100860 | 2101660 | 0           | 0          | #DIV/0! |
| hypothetical protein                                                           | 2115 | 2101846 | 2102700 | 74.94145199 | 78.4496487 | 1.04681 |
| Surface proteins containing Ig-like domains-like<br>precursor                  | 2114 | 2102793 | 2105747 | 67.02775897 | 61.4243399 | 0.9164  |
| Large exoproteins involved in heme utilization or<br>adhesion                  | 2113 | 2105926 | 2108499 | 51.6906335  | 46.651574  | 0.90252 |
| Autotransporter adhesin                                                        |      | 2108509 | 2110230 | 36.02556653 | 24.3303312 | 0.67536 |
| hypothetical protein                                                           | 2111 | 2110234 | 2111244 | 34.65346535 | 46.0643564 | 1.32929 |
| COG1565: Uncharacterized conserved protein                                     |      | 2110879 | 2111649 | 5.194805195 | 9.66753247 | 1.861   |
| hypothetical protein                                                           |      | 2111964 | 2112083 | 0           | 0          | #DIV/0! |
| hypothetical protein                                                           | 2108 | 2112106 | 2112621 | 3.883495146 | 1.80679612 | 0.46525 |
| hypothetical protein                                                           | 2107 | 2112721 | 2113329 | 0           | 0          | #DIV/0! |
| hypothetical protein                                                           | 2106 | 2113361 | 2113807 | 0           | 0          | #DIV/0! |
| hypothetical protein                                                           | 2105 | 2113814 | 2114665 | 0           | 2.18683901 | #DIV/0! |
| hypothetical protein                                                           | 2104 | 2114669 | 2116156 | 0           | 0.62575656 | #DIV/0! |
| hypothetical protein                                                           | 2103 | 2116166 | 2116393 | 0           | 0          | #DIV/0! |
| hypothetical protein                                                           | 2102 | 2116393 | 2116914 | 0           | 1.78598848 | #DIV/0! |
| hypothetical protein                                                           | 2101 | 2117188 | 2117475 | 0           | 3.24216028 | #DIV/0! |
| hypothetical protein                                                           | 2100 | 2117432 | 2117737 | 6.557377049 | 0          | 0       |
| hypothetical protein                                                           | 2099 | 2117761 | 2118285 | 1.908396947 | 1.77576336 | 0.9305  |
| hypothetical protein                                                           |      | 2118258 | 2118389 | 0           | 0          | #DIV/0! |
| hypothetical protein                                                           | 2097 | 2118393 | 2120354 | 1.019887812 | 0          | 0       |
| hypothetical protein                                                           | 2096 | 2120365 | 2120655 | 0           | 6.81684982 | #DIV/0! |
| hypothetical protein                                                           | 2095 | 2120658 | 2121011 | 2.83286119  | 0          | 0       |
| Putative DNA primase/helicase                                                  | 2094 | 2120996 | 2122384 | 1.46627566  | 0          | 0       |
| hypothetical protein                                                           | 2093 | 2122946 | 2123059 | 0           | 0          | #DIV/0! |
| hypothetical protein                                                           |      | 2123260 | 2123388 | 0           | 0          | #DIV/0! |
| hypothetical protein                                                           | 2091 | 2123776 | 2123919 | 0           | 6.50699301 | #DIV/0! |
| hypothetical protein                                                           | 2090 | 2123916 | 2124044 | 0           | 0          | #DIV/0! |
| hypothetical protein                                                           |      | 2124115 | 2124366 | 0           | 3.70717131 | #DIV/0! |
| hypothetical protein                                                           | 2088 | 2124457 | 2124657 | 0           | 0          | #DIV/0! |
| hypothetical protein                                                           | 2087 | 2124746 | 2125018 | 0           | 0          | #DIV/0! |
| hypothetical protein                                                           | 2086 | 2125018 | 2125560 | 1.84501845  | 0          | 0       |
| ORF009                                                                         | 2085 | 2125575 | 2126795 | 0           | 0          | #DIV/0! |
| Phage portal protein, HK97                                                     | 2084 | 2126792 | 2128021 | 0           | 0          | #DIV/0! |
| Two component transcriptional regulator, LuxR<br>family                        | 2083 | 2128025 | 2128726 | 1.426533524 | 0          | 0       |
| Probable prohead protease                                                      | 2082 | 2128720 | 2129388 | 0           | 0          | #DIV/0! |
| Major capsid protein, HK97 family                                              | 2081 | 2129457 | 2130758 | 0           | 0          | #DIV/0! |
| Phage integrase                                                                | 2080 | 2130883 | 2132121 | 0           | 0          | #DIV/0! |



|                                                                             |      |         |         |             |            |         |
|-----------------------------------------------------------------------------|------|---------|---------|-------------|------------|---------|
| hypothetical protein                                                        | 2079 | 2132376 | 2150243 | 2.406671517 | 1.82277383 | 0.75738 |
| hypothetical protein                                                        | 2078 | 2150352 | 2152667 | 223.7580994 | 219.461339 | 0.9808  |
| hypothetical protein                                                        | 2076 | 2152649 | 2152849 | 5           | 0          | 0       |
| hypothetical protein                                                        | 2077 | 2152839 | 2153969 | 60.17699115 | 79.0513274 | 1.31365 |
| Large repetitive protein                                                    | 2075 | 2154054 | 2169251 | 156.4124498 | 136.234948 | 0.871   |
| hypothetical protein                                                        |      | 2169233 | 2169409 | 11.36363636 | 0          | 0       |
| Hemolysins and related proteins containing CBS domains                      | 2073 | 2169492 | 2170757 | 29.24901186 | 34.5719368 | 1.18199 |
| Mutator mutT protein (7,8-dihydro-8-oxoguanine-triphosphatase) (EC 3.6.1.-) | 2072 | 2170754 | 2171158 | 4.95049505  | 9.21287129 | 1.861   |
| hypothetical protein                                                        | 2071 | 2171348 | 2171605 | 42.80155642 | 7.24124514 | 0.16918 |
| hypothetical protein                                                        | 2070 | 2171613 | 2171888 | 7.272727273 | 10.1509091 | 1.39575 |
| FOG: CheY-like receiver                                                     | 2069 | 2171966 | 2176516 | 33.2306338  | 25.18739   | 0.75796 |
| Sensory box histidine kinase/response regulator                             | 2068 | 2176506 | 2179028 | 36.08247423 | 22.5061459 | 0.62374 |
| Adenylate cyclase (EC 4.6.1.1)                                              | 2067 | 2179032 | 2180321 | 26.37703646 | 24.5438324 | 0.9305  |
| hypothetical protein                                                        |      | 2180471 | 2181121 | 0           | 1.44487578 | #DIV/0! |
| Mutator mutT protein (7,8-dihydro-8-oxoguanine-triphosphatase) (EC 3.6.1.-) | 2065 | 2181067 | 2181528 | 4.338394794 | 4.03687636 | 0.9305  |
| transposase, mutator family                                                 | 2064 | 2181654 | 2182868 | 41.30052724 | 55.6010545 | 1.34626 |
| hypothetical protein                                                        | 2063 | 2182963 | 2183175 | 18.86792453 | 4.38915094 | 0.23263 |
| hypothetical protein                                                        | 2062 | 2183168 | 2183509 | 17.59530792 | 19.101173  | 1.08558 |
| hypothetical protein                                                        | 2061 | 2183502 | 2184095 | 8.431703204 | 9.4148398  | 1.1166  |
| hypothetical protein                                                        | 2060 | 2184428 | 2184646 | 9.174311927 | 4.26834862 | 0.46525 |
| hypothetical protein                                                        | 2059 | 2184732 | 2184926 | 5.154639175 | 4.79639175 | 0.9305  |
| hypothetical protein                                                        | 2058 | 2184901 | 2185020 | 0           | 0          | #DIV/0! |
| hypothetical protein                                                        | 2057 | 2185042 | 2185191 | 7.575757576 | 0          | 0       |
| hypothetical protein                                                        |      | 2185371 | 2185769 | 0           | 7.10305344 | #DIV/0! |
| hypothetical protein                                                        | 2055 | 2185960 | 2186085 | 0           | 0          | #DIV/0! |
| hypothetical protein                                                        |      | 2186124 | 2186282 | 0           | 0          | #DIV/0! |
| hypothetical protein                                                        | 2053 | 2186366 | 2186509 | 0           | 6.50699301 | #DIV/0! |
| putative DNA primase/helicase                                               | 2052 | 2186638 | 2188032 | 1.43472023  | 0.66750359 | 0.46525 |
| hypothetical protein                                                        | 2051 | 2188032 | 2188367 | 0           | 0          | #DIV/0! |
| hypothetical protein                                                        | 2050 | 2188649 | 2188939 | 3.448275862 | 0          | 0       |
| hypothetical protein                                                        | 2049 | 2188948 | 2190990 | 2.448579824 | 0.91136141 | 0.3722  |
| hypothetical protein                                                        | 2048 | 2191033 | 2191557 | 3.816793893 | 1.77576336 | 0.46525 |
| hypothetical protein                                                        | 2047 | 2191584 | 2191967 | 0           | 0          | #DIV/0! |
| hypothetical protein                                                        | 2046 | 2192006 | 2192386 | 0           | 2.52168022 | #DIV/0! |
| NLP/P60 family secreted protein                                             | 2045 | 2192383 | 2192904 | 0           | 1.78598848 | #DIV/0! |
| hypothetical protein                                                        | 2044 | 2192904 | 2193131 | 4.405286344 | 0          | 0       |
| hypothetical protein                                                        | 2043 | 2193151 | 2194662 | 0           | 1.23163468 | #DIV/0! |
| hypothetical protein                                                        | 2042 | 2194659 | 2195537 | 0           | 1.05979499 | #DIV/0! |
| hypothetical protein                                                        | 2041 | 2195534 | 2195968 | 0           | 0          | #DIV/0! |
| hypothetical protein                                                        | 2040 | 2195992 | 2196588 | 0           | 0          | #DIV/0! |
| hypothetical protein                                                        |      | 2196673 | 2196831 | 0           | 0          | #DIV/0! |
| putative DNA helicase                                                       | 2038 | 2197009 | 2197848 | 14.30274136 | 1.1090584  | 0.07754 |
| hypothetical protein                                                        | 2037 | 2197910 | 2198575 | 3.007518797 | 2.79849624 | 0.9305  |
| hypothetical protein                                                        | 2036 | 2198728 | 2199282 | 0           | 0          | #DIV/0! |
| hypothetical protein                                                        | 2035 | 2199304 | 2199582 | 0           | 0          | #DIV/0! |
| hypothetical protein                                                        | 2034 | 2199809 | 2200576 | 0           | 0          | #DIV/0! |
| hypothetical protein                                                        |      | 2200786 | 2200938 | 0           | 0          | #DIV/0! |
| hypothetical protein                                                        | 2032 | 2201133 | 2201549 | 0           | 0          | #DIV/0! |



|                                                                      |      |         |         |             |            |         |
|----------------------------------------------------------------------|------|---------|---------|-------------|------------|---------|
| hypothetical protein                                                 |      | 2201565 | 2202080 | 5.825242718 | 0          | 0       |
| hypothetical protein                                                 |      | 2202080 | 2202214 | 0           | 0          | #DIV/0! |
| DNA polymerase III alpha subunit (EC 2.7.7.7)                        | 2029 | 2202498 | 2205446 | 39.41055517 | 38.5848184 | 0.97905 |
| DNA polymerase IV (EC 2.7.7.7)                                       | 2028 | 2205439 | 2206656 | 27.5        | 28.6904167 | 1.04329 |
| COG1801: Uncharacterized conserved protein                           | 2027 | 2206659 | 2207462 | 30.53435115 | 31.9637405 | 1.04681 |
| transcriptional regulator, putative                                  | 2026 | 2207575 | 2208198 | 20.70393375 | 32.7505176 | 1.58185 |
| hypothetical protein                                                 | 2025 | 2208226 | 2208588 | 11.04972376 | 2.57044199 | 0.23263 |
| putative helicase                                                    | 2024 | 2208590 | 2213590 | 39.4        | 38.1505    | 0.96829 |
| Exonuclease SbcC                                                     | 2023 | 2213635 | 2214786 | 3.475238923 | 0          | 0       |
| hypothetical protein                                                 | 2022 | 2215253 | 2215789 | 7.462686567 | 3.47201493 | 0.46525 |
| hypothetical protein                                                 | 2021 | 2215828 | 2215953 | 0           | 0          | #DIV/0! |
| hypothetical protein                                                 |      | 2216482 | 2216640 | 0           | 0          | #DIV/0! |
| hypothetical protein                                                 | 2019 | 2216641 | 2216970 | 0           | 0          | #DIV/0! |
| hypothetical protein                                                 | 2018 | 2217029 | 2217448 | 0           | 0          | #DIV/0! |
| Major capsid protein, HK97 family                                    | 2017 | 2217487 | 2218791 | 3.900156006 | 0          | 0       |
| hypothetical protein                                                 | 2016 | 2218860 | 2219555 | 1.438848921 | 2.67769784 | 1.861   |
| BarA-associated response regulator UvrY (= GacA = SirA)              | 2015 | 2219536 | 2220258 | 2.770083102 | 2.57756233 | 0.9305  |
| Portal protein                                                       | 2014 | 2220248 | 2221438 | 3.439380911 | 9.60103181 | 2.7915  |
| ORF009                                                               | 2013 | 2221495 | 2222730 | 0           | 0          | #DIV/0! |
| hypothetical protein                                                 | 2012 | 2222733 | 2223269 | 3.731343284 | 0          | 0       |
| hypothetical protein                                                 | 2011 | 2223253 | 2223579 | 3.184713376 | 0          | 0       |
| site-specific recombinase, phage integrase family                    | 2010 | 2223709 | 2225178 | 31.56384505 | 17.3550933 | 0.54984 |
| hypothetical protein                                                 |      | 2225626 | 2225766 | 0           | 0          | #DIV/0! |
| hypothetical protein                                                 | 2007 | 2225887 | 2244411 | 18.03066292 | 24.6639765 | 1.36789 |
| hypothetical protein                                                 | 2006 | 2244493 | 2245524 | 146.4597478 | 170.576625 | 1.16467 |
| BNR domain protein                                                   | 2005 | 2245502 | 2249899 | 210.1432795 | 180.301569 | 0.85799 |
| Cytoplasmic filament protein A                                       | 2004 | 2249918 | 2251879 | 143.2942376 | 135.233299 | 0.94375 |
| Predicted beta-xyloside ABC transporter, substrate-binding component | 2003 | 2251876 | 2253201 | 113.9622642 | 80.7603774 | 0.70866 |
| hypothetical protein                                                 | 2002 | 2253207 | 2253875 | 32.93413174 | 22.2874251 | 0.67673 |
| hypothetical protein                                                 | 2001 | 2253877 | 2255142 | 20.55335968 | 27.9517787 | 1.35996 |
| Esterase/lipase                                                      | 2000 | 2255152 | 2256057 | 35.35911602 | 26.7325967 | 0.75603 |
| exported protein                                                     | 1999 | 2256410 | 2256886 | 94.53781513 | 107.515756 | 1.13728 |
| hypothetical protein                                                 | 1998 | 2256888 | 2257595 | 182.4611033 | 167.147808 | 0.91607 |
| transcriptional regulator, Crp/Fnr family                            | 1997 | 2257730 | 2258905 | 166.8085106 | 123.538723 | 0.7406  |
| hypothetical protein                                                 |      | 2258891 | 2259022 | 213.740458  | 63.9274809 | 0.29909 |
| UDP-N-acetylenolpyruvoylglucosamine reductase (EC 1.1.1.158)         | 1995 | 2259058 | 2260038 | 67.34693878 | 58.8683673 | 0.87411 |
| putative adenylate/guanylate cyclase                                 | 1994 | 2260025 | 2262103 | 37.5360924  | 41.644129  | 1.10944 |
| hypothetical protein                                                 | 1993 | 2262155 | 2262367 | 28.30188679 | 17.5566038 | 0.62033 |
| hypothetical protein                                                 | 1992 | 2262385 | 2262966 | 848.5370052 | 1092.25645 | 1.28722 |
| hypothetical protein                                                 | 1991 | 2263161 | 2263310 | 416.1073826 | 224.818792 | 0.54029 |
| Pyruvate-flavodoxin oxidoreductase (EC 1.2.7.-)                      | 1990 | 2263640 | 2267203 | 1034.913426 | 1284.42279 | 1.24109 |
| B. burgdorferi predicted coding region BB0351                        | 1989 | 2267515 | 2269047 | 201.6971279 | 225.336488 | 1.1172  |
| hypothetical protein                                                 | 1988 | 2269057 | 2270355 | 254.2372881 | 256.640216 | 1.00945 |
| HAD superfamily hydrolase                                            | 1987 | 2270389 | 2271033 | 57.45341615 | 41.9013975 | 0.72931 |
| Sensory box histidine kinase/response regulator                      | 1986 | 2271058 | 2273616 | 72.04385278 | 58.2928739 | 0.80913 |
| FOG: CheY-like receiver                                              | 1985 | 2273636 | 2277232 | 62.56952169 | 54.5983037 | 0.8726  |

|                                                                                                                            |      |         |         |             |            |         |
|----------------------------------------------------------------------------------------------------------------------------|------|---------|---------|-------------|------------|---------|
| hypothetical protein                                                                                                       | 1983 | 2277254 | 2277958 | 53.97727273 | 47.5823864 | 0.88153 |
| hypothetical protein                                                                                                       |      | 2277938 | 2278078 | 0           | 0          | #DIV/0! |
| Ferric iron ABC transporter, iron-binding protein                                                                          | 1982 | 2278310 | 2279359 | 951.3822688 | 656.406101 | 0.68995 |
| Ferric iron ABC transporter, permease protein                                                                              | 1981 | 2279453 | 2281234 | 204.379562  | 136.884335 | 0.66976 |
| Putrescine transport ATP-binding protein potG (TC 3.A.1.11.2)                                                              | 1980 | 2281227 | 2282366 | 86.0403863  | 69.4402985 | 0.80707 |
| hypothetical protein                                                                                                       | 1979 | 2282653 | 2283735 | 60.07393715 | 32.6792976 | 0.54398 |
| 2-haloalkanoic acid dehalogenase (EC 3.8.1.2)                                                                              | 1978 | 2283732 | 2284499 | 62.58148631 | 32.7555411 | 0.52341 |
| L-2-haloalkanoic acid dehalogenase                                                                                         | 1977 | 2284492 | 2285262 | 77.92207792 | 31.4194805 | 0.40322 |
| Ferric iron ABC transporter, permease protein                                                                              | 1976 | 2285309 | 2287174 | 39.14209115 | 19.9571046 | 0.50986 |
| Maltose/maltodextrin transport ATP-binding protein MalK (EC 3.6.3.19); Multiple sugar ABC transporter, ATP-binding protein | 1975 | 2287239 | 2288360 | 84.74576271 | 51.4638715 | 0.60727 |
| CELL PROCESSES                                                                                                             | 1974 | 2288382 | 2289578 | 92.80936455 | 78.5790134 | 0.84667 |
| hypothetical protein                                                                                                       | 1973 | 2289688 | 2290116 | 32.71028037 | 15.2184579 | 0.46525 |
| Ribose operon repressor                                                                                                    | 1972 | 2290211 | 2291275 | 90.22556391 | 49.8482143 | 0.55248 |
| Ribokinase (EC 2.7.1.15)                                                                                                   | 1971 | 2291259 | 2292152 | 129.8992161 | 128.165174 | 0.98665 |
| Mg(2+) transport ATPase/permease tetrapyrrole methylase family protein/MazG family protein                                 | 1970 | 2292180 | 2292881 | 91.29814551 | 74.3338088 | 0.81419 |
| D-3-phosphoglycerate dehydrogenase (EC 1.1.1.95)                                                                           | 1969 | 2292907 | 2293788 | 262.2020431 | 255.597049 | 0.97481 |
| Peptidyl-tRNA hydrolase (EC 3.1.1.29)                                                                                      | 1968 | 2293811 | 2294785 | 155.0308008 | 133.747433 | 0.86272 |
| Alpha-galactosidase (EC 3.2.1.22)                                                                                          | 1967 | 2294801 | 2295424 | 32.10272873 | 34.3523274 | 1.07008 |
| Manganese-dependent inorganic pyrophosphatase (EC 3.6.1.1)                                                                 | 1966 | 2295496 | 2297352 | 53.34051724 | 57.654903  | 1.08088 |
| Cu(I)-responsive transcriptional regulator                                                                                 | 1965 | 2297353 | 2299005 | 112.590799  | 116.030872 | 1.03055 |
| Transposase                                                                                                                | 1964 | 2299264 | 2300076 | 45.56650246 | 30.9402709 | 0.67901 |
| Uroporphyrinogen-III decarboxylase                                                                                         | 1963 | 2300239 | 2301294 | 25.59241706 | 16.7578199 | 0.6548  |
| COG0523: Putative GTPases (G3E family)                                                                                     | 1962 | 2301377 | 2302345 | 21.69421488 | 12.4963843 | 0.57602 |
| hypothetical protein                                                                                                       | 1961 | 2302410 | 2303021 | 11.45662848 | 16.7520458 | 1.46221 |
| Oligopeptide transport ATP-binding protein oppF (TC 3.A.1.5.1)                                                             | 1960 | 2303022 | 2303438 | 24.03846154 | 20.1310096 | 0.83745 |
| Oligopeptide transport ATP-binding protein oppD (TC 3.A.1.5.1)                                                             | 1959 | 2303531 | 2304589 | 72.77882798 | 91.4669187 | 1.25678 |
| Dipeptide transport system permease protein dppC (TC 3.A.1.5.2)                                                            | 1958 | 2304599 | 2305600 | 160.8391608 | 208.223776 | 1.29461 |
| Binding-protein-dependent transport systems inner membrane component                                                       | 1957 | 2305612 | 2306499 | 171.3641488 | 199.317926 | 1.16313 |
| ABC transporter, substrate binding protein                                                                                 | 1956 | 2306506 | 2307453 | 214.3611404 | 219.114572 | 1.02217 |
| Iron-sulfur flavoprotein                                                                                                   | 1955 | 2307511 | 2309124 | 549.2870428 | 734.362368 | 1.33694 |
| NimC/NimA family protein                                                                                                   | 1954 | 2309297 | 2309866 | 297.0123023 | 345.053603 | 1.16175 |
| hypothetical protein                                                                                                       | 1952 | 2309998 | 2310390 | 464.2857143 | 382.169643 | 0.82313 |
| ATP-dependent Clp protease proteolytic subunit (EC 3.4.21.92)                                                              | 1953 | 2310380 | 2311498 | 117.1735242 | 152.309034 | 1.29986 |
| Similar to C-terminal domain of competence/damage-inducible protein CinA                                                   | 1951 | 2311517 | 2312152 | 809.4488189 | 577.349606 | 0.71326 |
| hypothetical protein                                                                                                       | 1950 | 2312188 | 2312718 | 135.8490566 | 131.674528 | 0.96927 |
| Two-component system response regulator                                                                                    | 1949 | 2312711 | 2313127 | 966.3461538 | 881.290865 | 0.91198 |
| Apolipoprotein N-acyltransferase (EC 2.3.1.-) / Copper homeostasis protein CutE                                            | 1948 | 2313111 | 2313848 | 245.5902307 | 253.772727 | 1.03332 |
|                                                                                                                            | 1947 | 2313848 | 2315476 | 124.6928747 | 112.597359 | 0.903   |

|                                                                             |      |         |         |             |            |         |
|-----------------------------------------------------------------------------|------|---------|---------|-------------|------------|---------|
| Integration host factor alpha subunit                                       | 1946 | 2315473 | 2315883 | 924.3902439 | 848.797561 | 0.91822 |
| SSU ribosomal protein S20p                                                  | 1945 | 2315944 | 2316219 | 730.9090909 | 433.105455 | 0.59256 |
| hypothetical protein                                                        | 1944 | 2316384 | 2316521 | 1897.810219 | 1623.28102 | 0.85534 |
| D-allose-6-phosphate isomerase (EC 5.3.1.-)                                 | 1943 | 2316584 | 2317039 | 54.94505495 | 59.3065934 | 1.07938 |
| Iron-dependent repressor IdeR/DtxR                                          | 1942 | 2317109 | 2317489 | 300         | 335.469737 | 1.11823 |
| NOL1/NOP2/sun family protein                                                | 1941 | 2317452 | 2318273 | 32.88672351 | 61.2021924 | 1.861   |
| tRNA pseudouridine synthase A (EC 4.2.1.70)                                 | 1940 | 2318279 | 2319121 | 36.81710214 | 41.9940618 | 1.14061 |
| hypothetical protein                                                        | 1939 | 2319114 | 2319980 | 84.29561201 | 97.7777136 | 1.15994 |
| Holo-[acyl-carrier protein] synthase (EC 2.7.8.7)                           | 1938 | 2319988 | 2320362 | 133.6898396 | 154.254011 | 1.15382 |
| uncharacterized secreted protein, YBBR Bacillus subtilis homolog            | 1937 | 2320424 | 2321392 | 170.4545455 | 144.18905  | 0.84591 |
| ABC transporter, permease protein ybbP / Tlr1762 protein                    | 1936 | 2321382 | 2322239 | 186.697783  | 172.636523 | 0.92468 |
| 1-deoxy-D-xylulose 5-phosphate synthase (EC 2.2.1.7)                        | 1935 | 2322314 | 2324239 | 102.8571429 | 118.910649 | 1.15608 |
| hypothetical protein                                                        | 1934 | 2324428 | 2324568 | 3821.428571 | 2545.58214 | 0.66613 |
| hypothetical protein                                                        | 1933 | 2324934 | 2325068 | 216.4179104 | 402.753731 | 1.861   |
| Flagellin protein flaA                                                      | 1932 | 2325141 | 2326001 | 1486.873508 | 2304.04236 | 1.54959 |
| Flagellin protein flaA                                                      | 1931 | 2326331 | 2327185 | 3943.793911 | 3679.50644 | 0.93299 |
| Flagellin protein flaG                                                      | 1930 | 2327342 | 2327725 | 629.2428198 | 483.471279 | 0.76834 |
| Flagellar hook-associated protein flhD                                      | 1929 | 2327787 | 2329817 | 183.2512315 | 186.1      | 1.01555 |
| hypothetical protein                                                        | 1928 | 2329829 | 2330788 | 67.77893639 | 86.3550574 | 1.27407 |
| hypothetical protein                                                        | 1927 | 2330805 | 2331899 | 131.6270567 | 134.386654 | 1.02097 |
| hypothetical protein                                                        | 1926 | 2331956 | 2332219 | 60.8365019  | 67.2224335 | 1.10497 |
| ATPase YjeE, predicted to have essential role in cell wall biosynthesis     | 1925 | 2332248 | 2332652 | 160.8910891 | 140.496287 | 0.87324 |
| Inactive homolog of metal-dependent proteases, putative molecular chaperone | 1924 | 2332649 | 2333344 | 51.79856115 | 52.2151079 | 1.00804 |
| Response regulator                                                          | 1923 | 2333381 | 2334538 | 72.60155575 | 67.5557476 | 0.9305  |
| Carbon storage regulator homolog                                            | 1922 | 2334544 | 2334777 | 167.3819742 | 99.8390558 | 0.59647 |
| Transmembrane protein                                                       | 1921 | 2334771 | 2335220 | 229.3986637 | 142.994432 | 0.62334 |
| Flagellar hook-associated protein flgL                                      | 1920 | 2335249 | 2336496 | 268.0577849 | 240.466292 | 0.89707 |
| Flagellar hook-associated protein flgK                                      | 1919 | 2336555 | 2338435 | 230.3191489 | 220.746277 | 0.95844 |
| Uncharacterized protein TP_0661                                             | 1918 | 2338447 | 2338938 | 181.2627291 | 144.028513 | 0.79458 |
| Iron-sulfur flavoprotein                                                    | 1916 | 2339271 | 2339921 | 66.15384615 | 71.5769231 | 1.08198 |
| hypothetical protein                                                        |      | 2339932 | 2340054 | 24.59016393 | 7.62704918 | 0.31017 |
| 1-acyl-sn-glycerol-3-phosphate acyltransferase (EC 2.3.1.51)                | 1913 | 2340265 | 2340993 | 43.95604396 | 25.5631868 | 0.58156 |
| Acyl-CoA dehydrogenase (EC 1.3.99.3)                                        | 1912 | 2341026 | 2341655 | 55.64387917 | 39.9419714 | 0.71781 |
| Transcription-repair coupling factor                                        | 1911 | 2341678 | 2345115 | 51.23726346 | 44.1547307 | 0.86177 |
| hypothetical protein                                                        |      | 2345269 | 2346066 | 30.69053708 | 24.9878517 | 0.81419 |
| hypothetical protein                                                        |      | 2346059 | 2346190 | 7.633587786 | 0          | 0       |
| hypothetical protein                                                        | 1908 | 2346228 | 2346422 | 46.39175258 | 43.1675258 | 0.9305  |
| hypothetical protein                                                        | 1907 | 2346499 | 2347791 | 7.73993808  | 2.88080495 | 0.3722  |
| hypothetical protein                                                        | 1906 | 2347818 | 2348216 | 5.025125628 | 0          | 0       |
| hypothetical protein                                                        | 1905 | 2348217 | 2348582 | 21.91780822 | 2.54931507 | 0.11631 |
| hypothetical protein                                                        | 1904 | 2348598 | 2349218 | 25.80645161 | 9.00483871 | 0.34894 |
| Transposase                                                                 | 1903 | 2349263 | 2350318 | 26.54028436 | 22.049763  | 0.8308  |
| hypothetical protein                                                        |      | 2350372 | 2350545 | 23.12138728 | 10.7572254 | 0.46525 |
| Lea protein - soybean                                                       | 1901 | 2350601 | 2353684 | 16.21796951 | 10.261758  | 0.63274 |
| hypothetical protein                                                        |      | 2353763 | 2353894 | 0           | 0          | #DIV/0! |

|                                                           |      |         |         |             |            |         |
|-----------------------------------------------------------|------|---------|---------|-------------|------------|---------|
| hypothetical protein                                      | 1899 | 2353882 | 2354517 | 0           | 0          | #DIV/0! |
| hypothetical protein                                      | 1898 | 2354582 | 2355064 | 0           | 1.93049793 | #DIV/0! |
| Lea protein - soybean                                     | 1897 | 2355045 | 2358128 | 0.973078171 | 0.60363283 | 0.62033 |
| hypothetical protein                                      | 1896 | 2358212 | 2358688 | 0           | 0          | #DIV/0! |
| Leucine-rich repeat containing protein                    | 1895 | 2358771 | 2361188 | 2.068680182 | 3.46483244 | 1.6749  |
| hypothetical protein                                      | 1894 | 2361429 | 2361629 | 265         | 176.795    | 0.66715 |
| hypothetical protein                                      | 1892 | 2361669 | 2362583 | 67.83369803 | 37.6679431 | 0.5553  |
| hypothetical protein                                      |      | 2362580 | 2362714 | 7.462686567 | 6.94402985 | 0.9305  |
| hypothetical protein                                      | 1891 | 2362687 | 2364162 | 19.3637621  | 12.8699862 | 0.66464 |
| hypothetical protein                                      | 1890 | 2364199 | 2365062 | 8.955223881 | 0          | 0       |
| hypothetical protein                                      |      | 2365134 | 2365304 | 0           | 0          | #DIV/0! |
| hypothetical protein                                      | 1888 | 2365308 | 2365517 | 0           | 0          | #DIV/0! |
| hypothetical protein                                      | 1887 | 2365565 | 2365750 | 0           | 0          | #DIV/0! |
| hypothetical protein                                      | 1886 | 2365803 | 2366042 | 0           | 0          | #DIV/0! |
| Flagellar motor switch protein fliM                       | 1885 | 2366044 | 2366628 | 0           | 0          | #DIV/0! |
| Lea protein - soybean                                     | 1884 | 2366628 | 2369609 | 0           | 0.31214358 | #DIV/0! |
| hypothetical protein                                      | 1883 | 2369624 | 2370436 | 0           | 0          | #DIV/0! |
| hypothetical protein                                      | 1882 | 2370460 | 2371053 | 0           | 1.56913997 | #DIV/0! |
| hypothetical protein                                      | 1881 | 2371044 | 2371898 | 2.341920375 | 0          | 0       |
| hypothetical protein                                      |      | 2371901 | 2372035 | 0           | 0          | #DIV/0! |
|                                                           |      |         |         |             |            |         |
| sensory box histidine kinase/response regulator           | 1879 | 2372140 | 2374617 | 7.317073171 | 9.45630081 | 1.29236 |
| Probable AAA family ATPase                                | 1878 | 2374859 | 2376535 | 2.983293556 | 8.32786396 | 2.7915  |
| hypothetical protein                                      | 1877 | 2376614 | 2377168 | 16.24548736 | 8.39801444 | 0.51694 |
| hypothetical protein                                      | 1876 | 2377170 | 2377439 | 7.434944238 | 0          | 0       |
| hypothetical protein                                      | 1875 | 2377522 | 2377722 | 105         | 125.6175   | 1.19636 |
| hypothetical protein                                      | 1874 | 2377801 | 2377938 | 0           | 0          | #DIV/0! |
| Transcriptional regulator, DeoR family                    | 1873 | 2377935 | 2378966 | 7.759456838 | 6.31765276 | 0.81419 |
| hypothetical protein                                      |      | 2379059 | 2379190 | 0           | 0          | #DIV/0! |
| hypothetical protein                                      | 1871 | 2379201 | 2379716 | 1.941747573 | 1.80679612 | 0.9305  |
| hypothetical protein                                      | 1870 | 2379788 | 2379907 | 0           | 0          | #DIV/0! |
| hypothetical protein                                      | 1869 | 2380202 | 2380645 | 0           | 0          | #DIV/0! |
| hypothetical protein                                      |      | 2380700 | 2380822 | 0           | 0          | #DIV/0! |
| Cell surface protein                                      | 1867 | 2380970 | 2382556 | 16.39344262 | 17.0141866 | 1.03787 |
| hypothetical protein                                      | 1866 | 2382596 | 2383660 | 2.819548872 | 0          | 0       |
| hypothetical protein                                      | 1865 | 2384012 | 2384203 | 10.47120419 | 9.7434555  | 0.9305  |
| hypothetical protein                                      |      | 2384580 | 2384699 | 0           | 0          | #DIV/0! |
| transcriptional regulator, PemK family                    | 1863 | 2385490 | 2385831 | 93.84164223 | 81.8621701 | 0.87234 |
| hypothetical protein                                      | 1862 | 2385884 | 2386585 | 64.19400856 | 38.4942939 | 0.59966 |
| Probable two-component sensor, near polyamine transporter | 1861 | 2386659 | 2387867 | 14.07284768 | 23.8787252 | 1.69679 |
| Two component transcriptional regulator, LuxR family      | 1860 | 2387864 | 2388469 | 13.2231405  | 30.7603306 | 2.32625 |
| hypothetical protein                                      | 1859 | 2388501 | 2389160 | 25.79666161 | 14.1198786 | 0.54735 |
| hypothetical protein                                      | 1858 | 2389210 | 2390109 | 23.3592881  | 7.24527253 | 0.31017 |
| hypothetical protein                                      |      | 2390102 | 2390344 | 33.05785124 | 53.8305785 | 1.62838 |
| Lea protein - soybean                                     | 1856 | 2390554 | 2391981 | 18.22004205 | 11.0851437 | 0.6084  |
| Transcriptional regulator                                 | 1855 | 2392044 | 2393177 | 0.882612533 | 0          | 0       |
| Serine/threonine protein kinase                           | 1854 | 2393167 | 2394330 | 0.859845228 | 0.80008598 | 0.9305  |
|                                                           |      |         |         |             |            |         |
| Probable transcriptional regulatory protein sgaR          | 1853 | 2394374 | 2395033 | 1.517450683 | 2.82397572 | 1.861   |
| Putative kinase protein                                   | 1852 | 2395047 | 2396366 | 3.032600455 | 3.5272934  | 1.16313 |

|                                                                                                                  |      |         |         |             |            |         |
|------------------------------------------------------------------------------------------------------------------|------|---------|---------|-------------|------------|---------|
| Chaperone protein DnaK                                                                                           | 1851 | 2396380 | 2397186 | 7.444168734 | 2.308933   | 0.31017 |
| hypothetical protein                                                                                             | 1850 | 2397257 | 2398123 | 6.928406467 | 4.29792148 | 0.62033 |
| hypothetical protein                                                                                             | 1849 | 2398134 | 2398739 | 6.611570248 | 6.15206612 | 0.9305  |
| hypothetical protein                                                                                             | 1848 | 2398751 | 2399452 | 5.706134094 | 6.63694722 | 1.16313 |
| hypothetical protein                                                                                             | 1847 | 2399456 | 2401438 | 6.559031282 | 4.2252775  | 0.64419 |
| Formate efflux transporter (TC 2.A.44 family)                                                                    | 1846 | 2401560 | 2402393 | 84.03361345 | 73.72509   | 0.87733 |
| MiaB family protein, possibly involved in tRNA or rRNA modification                                              | 1844 | 2403296 | 2404906 | 61.49068323 | 79.7571429 | 1.29706 |
| TPR domain protein                                                                                               | 1843 | 2404911 | 2405543 | 101.2658228 | 85.3939873 | 0.84327 |
| hypothetical protein                                                                                             | 1842 | 2405550 | 2405924 | 96.25668449 | 69.6631016 | 0.72372 |
| Phosphate acetyltransferase (EC 2.3.1.8)                                                                         | 1841 | 2406113 | 2407111 | 1028.056112 | 1070.35471 | 1.04114 |
| Fumarate reductase flavoprotein subunit (EC 1.3.99.1)                                                            | 1840 | 2407225 | 2407581 | 148.8764045 | 109.77809  | 0.73738 |
| Pyruvate,phosphate dikinase (EC 2.7.9.1)                                                                         | 1839 | 2407593 | 2409350 | 48.3779169  | 57.1963574 | 1.18228 |
| Uncharacterized protein TP_0747                                                                                  | 1838 | 2409350 | 2410426 | 37.17472119 | 40.6445167 | 1.09334 |
| hypothetical protein                                                                                             |      | 2410420 | 2410527 | 0           | 0          | #DIV/0! |
| DHH family/DHHA1 domain protein                                                                                  | 1836 | 2410519 | 2411517 | 87.1743487  | 139.854709 | 1.60431 |
| hypothetical protein                                                                                             | 1835 | 2411514 | 2413019 | 144.5702865 | 164.898734 | 1.14061 |
| ATP-dependent Clp protease ATP-binding subunit clpA                                                              | 1834 | 2413474 | 2416089 | 130.0191205 | 116.712811 | 0.89766 |
| Glucose-1-phosphate adenylyltransferase (EC 2.7.7.27)                                                            | 1833 | 2416114 | 2417388 | 315.3724247 | 342.854596 | 1.08714 |
| ATP-dependent RNA helicase                                                                                       | 1832 | 2417500 | 2419953 | 64.81858948 | 72.8316347 | 1.12362 |
| unknown                                                                                                          | 1831 | 2419943 | 2421256 | 22.08682407 | 32.5993907 | 1.47597 |
| Predicted amino-acid acetyltransferase (EC 2.3.1.1) complementing ArgA function in Arginine Biosynthesis pathway | 1830 | 2421231 | 2421662 | 169.3735499 | 118.741299 | 0.70106 |
| Holliday junction DNA helicase RuvA                                                                              | 1829 | 2421697 | 2422290 | 111.2984823 | 67.4730185 | 0.60623 |
| Transcriptional regulator, DeoR family                                                                           | 1828 | 2422354 | 2423382 | 85.60311284 | 62.4557393 | 0.7296  |
| RNA polymerase sigma factor RpoD                                                                                 | 1827 | 2423727 | 2424614 | 72.15332582 | 76.5800451 | 1.06135 |
| Probable AAA family ATPase                                                                                       | 1826 | 2424698 | 2426923 | 11.23595506 | 9.61865169 | 0.85606 |
| hypothetical protein                                                                                             | 1825 | 2426925 | 2427068 | 48.95104895 | 52.0559441 | 1.06343 |
| hypothetical protein                                                                                             | 1824 | 2427236 | 2427619 | 20.88772846 | 4.85900783 | 0.23263 |
| Ribosomal protein S12                                                                                            | 1823 | 2427678 | 2428442 | 18.32460733 | 18.2689791 | 0.99696 |
| hypothetical protein                                                                                             | 1822 | 2428503 | 2428907 | 17.32673267 | 50.6707921 | 2.92443 |
| hypothetical protein                                                                                             | 1821 | 2428904 | 2429317 | 4.842615012 | 2.25302663 | 0.46525 |
| hydrolase, putative                                                                                              | 1820 | 2429364 | 2430167 | 57.28518057 | 68.367995  | 1.19347 |
| hypothetical protein                                                                                             | 1819 | 2430176 | 2432812 | 34.14264036 | 26.1217754 | 0.76508 |
| ATP-dependent nuclease, subunit A                                                                                | 1818 | 2432809 | 2435967 | 22.1659278  | 21.8039899 | 0.98367 |
| hypothetical protein                                                                                             |      | 2435951 | 2436064 | 17.69911504 | 0          | 0       |
| hypothetical protein                                                                                             | 1816 | 2436052 | 2436645 | 5.059021922 | 3.13827993 | 0.62033 |
| Protein of unknown function DUF262 family                                                                        | 1815 | 2436716 | 2438041 | 6.037735849 | 5.61811321 | 0.9305  |
| hypothetical protein                                                                                             | 1814 | 2438038 | 2440005 | 11.6929334  | 4.25749873 | 0.36411 |
| GldJ                                                                                                             | 1813 | 2440214 | 2441764 | 15.48387097 | 4.80258065 | 0.31017 |
| hypothetical protein                                                                                             | 1812 | 2441761 | 2442384 | 3.210272873 | 1.49357945 | 0.46525 |
| hypothetical protein                                                                                             | 1811 | 2442437 | 2442772 | 20.89552239 | 16.6656716 | 0.79757 |
| hypothetical protein                                                                                             | 1810 | 2442772 | 2443077 | 81.96721311 | 45.7622951 | 0.5583  |
| Holliday junction DNA helicase RuvB                                                                              | 1809 | 2443206 | 2444285 | 115.8480074 | 114.695551 | 0.99005 |
| S-adenosylmethionine:tRNA ribosyltransferase-isomerase (EC 5.-.-.-)                                              | 1808 | 2444260 | 2445282 | 59.68688845 | 50.0758317 | 0.83898 |
| Uncharacterized protein TP_0927                                                                                  | 1807 | 2445343 | 2445558 | 120.9302326 | 99.5418605 | 0.82313 |
| Neopullulanase (EC 3.2.1.135)                                                                                    |      | 2445551 | 2447377 | 37.78751369 | 53.5062979 | 1.41598 |



|                                                  |      |         |         |             |            |         |
|--------------------------------------------------|------|---------|---------|-------------|------------|---------|
| D-glycerate 2-kinase (EC 2.7.1.-)                | 1805 | 2447403 | 2448650 | 80.19246191 | 74.6190858 | 0.9305  |
| Putative sucrose phosphorylase (EC 2.4.1.7)      | 1803 | 2449080 | 2450915 | 39.23705722 | 51.2155313 | 1.30528 |
| Cytidine deaminase (EC 3.5.4.5)                  | 1802 | 2450915 | 2451313 | 25.12562814 | 65.4623116 | 2.6054  |
| hypothetical protein                             | 1801 | 2451403 | 2453517 | 81.83538316 | 101.677152 | 1.24246 |
| Acetyl-coenzyme A synthetase (EC 6.2.1.1)        | 1800 | 2453645 | 2455387 | 205.510907  | 214.196613 | 1.04226 |
| Transcriptional regulator, Hth-3 family          | 1799 | 2455415 | 2455969 | 119.133574  | 157.882671 | 1.32526 |
| 3-dehydroquinate dehydratase (EC 4.2.1.10) /     |      |         |         |             |            |         |
| Shikimate 5-dehydrogenase (EC 1.1.1.25)          | 1798 | 2455981 | 2457501 | 110.5263158 | 114.475987 | 1.03574 |
| hypothetical protein                             | 1797 | 2457538 | 2458053 | 60.19417476 | 45.1699029 | 0.7504  |
| FemA protein                                     | 1796 | 2458050 | 2459168 | 100.1788909 | 103.203936 | 1.0302  |
| Methionyl-tRNA synthetase (EC 6.1.1.10)          | 1795 | 2459168 | 2461651 | 227.5473218 | 199.740838 | 0.8778  |
| ATPase                                           | 1794 | 2461769 | 2463067 | 6.163328197 | 2.15061633 | 0.34894 |
| hypothetical protein                             |      | 2463074 | 2463256 | 43.95604396 | 20.4505495 | 0.46525 |
| Flagellar hook-length control protein fliK       | 1793 | 2463247 | 2464617 | 143.7956204 | 137.19781  | 0.95412 |
| hypothetical protein                             |      | 2464614 | 2464748 | 156.7164179 | 131.936567 | 0.84188 |
| DNA-binding protein                              | 1790 | 2464869 | 2465198 | 21.27659574 | 8.48480243 | 0.39879 |
| Ribosomal large subunit pseudouridine synthase   |      |         |         |             |            |         |
| C (EC 4.2.1.70)                                  | 1789 | 2465206 | 2465916 | 23.94366197 | 24.9007042 | 1.03997 |
| hypothetical protein                             | 1788 | 2465968 | 2467137 | 110.3507271 | 93.1295979 | 0.84394 |
| Oligopeptide transport ATP-binding protein oppD  |      |         |         |             |            |         |
| (TC 3.A.1.5.1)                                   | 1787 | 2467215 | 2468195 | 162.244898  | 193.695918 | 1.19385 |
| Oligopeptide transport ATP-binding protein oppF  |      |         |         |             |            |         |
| (TC 3.A.1.5.1)                                   | 1786 | 2468192 | 2469154 | 64.44906445 | 60.9371102 | 0.94551 |
| Dipeptide transport system permease protein      |      |         |         |             |            |         |
| dppB (TC 3.A.1.5.2)                              | 1785 | 2469177 | 2470133 | 77.40585774 | 84.6793933 | 1.09397 |
| Oligopeptide transport system permease protein   |      |         |         |             |            |         |
| oppC (TC 3.A.1.5.1)                              | 1784 | 2470145 | 2471083 | 38.37953092 | 55.5522388 | 1.44744 |
| Proline dipeptidase                              | 1783 | 2471108 | 2472241 | 37.06972639 | 34.4933804 | 0.9305  |
| D-aminoacylase (EC 3.5.1.81)                     | 1782 | 2472280 | 2473893 | 68.19590825 | 73.8400496 | 1.08276 |
| Microsomal dipeptidase (EC 3.4.13.19)            | 1781 | 2473924 | 2475138 | 377.2652389 | 410.830313 | 1.08897 |
| Oligopeptide ABC transporter, periplasmic        |      |         |         |             |            |         |
| oligopeptide-binding protein oppA (TC 3.A.1.5.1) | 1780 | 2475192 | 2476832 | 356.097561  | 392.058232 | 1.10099 |
| PTS system, fructose-specific IIA component (EC  |      |         |         |             |            |         |
| 2.7.1.69) / PTS system, fructose-specific IIB    |      |         |         |             |            |         |
| component (EC 2.7.1.69) / PTS system, fructose-  |      |         |         |             |            |         |
| specific IIC component (EC 2.7.1.69)             | 1779 | 2476988 | 2477641 | 162.3277182 | 240.81853  | 1.48353 |
| Hemerythrin-like, metal-binding protein          | 1778 | 2478206 | 2478655 | 318.4855234 | 230.034521 | 0.72228 |
| hypothetical protein                             |      | 2478720 | 2478875 | 0           | 0          | #DIV/0! |
| Carbamoyl-phosphate synthase small chain (EC     |      |         |         |             |            |         |
| 6.3.5.5)                                         |      | 2478890 | 2480008 | 74.51701932 | 125.835787 | 1.68869 |
| Carbamoyl-phosphate synthase large chain (EC     |      |         |         |             |            |         |
| 6.3.5.5)                                         | 1775 | 2480005 | 2483274 | 63.03813038 | 84.9810886 | 1.34809 |
| hypothetical protein                             |      | 2483349 | 2484116 | 357.2359844 | 326.342243 | 0.91352 |
| Putative enzyme                                  | 1773 | 2484189 | 2486504 | 78.18574514 | 83.2023758 | 1.06416 |
| Lipoprotein releasing system transmembrane       |      |         |         |             |            |         |
| protein LolC                                     | 1772 | 2486593 | 2487852 | 69.10246227 | 55.4308975 | 0.80216 |
| Lipoprotein releasing system ATP-binding protein |      |         |         |             |            |         |
| lolD                                             | 1771 | 2487849 | 2488592 | 80.75370121 | 95.179004  | 1.17863 |
| Lipoprotein releasing system transmembrane       |      |         |         |             |            |         |
| protein LolC                                     | 1770 | 2488585 | 2489934 | 88.95478132 | 84.8417346 | 0.95376 |
| hypothetical protein                             | 1769 | 2489934 | 2491400 | 100.6160164 | 76.4271047 | 0.75959 |



|                                                                                                             |      |         |         |             |            |         |
|-------------------------------------------------------------------------------------------------------------|------|---------|---------|-------------|------------|---------|
| Signal recognition particle receptor protein FtsY<br>(=alpha subunit) (TC 3.A.5.1.1)                        | 1768 | 2491393 | 2492274 | 87.40068104 | 69.708286  | 0.79757 |
| hypothetical protein                                                                                        | 1767 | 2492286 | 2493794 | 86.87002653 | 69.7257958 | 0.80265 |
| incorrect start                                                                                             | 1766 | 2493781 | 2494725 | 190.1181525 | 238.871643 | 1.25644 |
| hypothetical protein                                                                                        | 1765 | 2494985 | 2495857 | 33.25688073 | 27.7442661 | 0.83424 |
| putative membrane protein                                                                                   | 1764 | 2495892 | 2496956 | 21.61654135 | 35.8557331 | 1.65872 |
| membrane protein, putative                                                                                  | 1763 | 2496953 | 2498236 | 91.19251754 | 158.105222 | 1.73375 |
| Deoxyuridine 5'-triphosphate nucleotidohydrolase<br>(EC 3.6.1.23)                                           | 1762 | 2498238 | 2498687 | 126.9487751 | 138.849666 | 1.09375 |
| Polyribonucleotide nucleotidyltransferase (EC<br>2.7.7.8)                                                   | 1761 | 2498709 | 2500898 | 416.0951075 | 622.035208 | 1.49494 |
| SSU ribosomal protein S15p (S13e)                                                                           | 1760 | 2501047 | 2501316 | 516.7286245 | 425.47026  | 0.82339 |
| Riboflavin kinase (EC 2.7.1.26) / FMN<br>adenylyltransferase (EC 2.7.7.2)                                   | 1759 | 2501341 | 2502129 | 219.5431472 | 231.444162 | 1.05421 |
| tRNA pseudouridine synthase B (EC 4.2.1.70)                                                                 | 1758 | 2502116 | 2503087 | 78.26982492 | 130.327497 | 1.66511 |
| Ribosome-binding factor A                                                                                   | 1757 | 2503062 | 2503436 | 184.4919786 | 136.838235 | 0.7417  |
| Translation initiation factor 2                                                                             | 1756 | 2503442 | 2506342 | 437.9310345 | 482.25569  | 1.10121 |
| Transcription termination protein NusA<br>COG0779: clustered with transcription termination<br>protein NusA | 1755 | 2506323 | 2507870 | 354.8597521 | 450.985975 | 1.27089 |
| hypothetical protein                                                                                        | 1754 | 2507875 | 2508384 | 269.1552063 | 323.572692 | 1.20218 |
| hypothetical protein                                                                                        | 1753 | 2508615 | 2509103 | 157.7868852 | 156.354508 | 0.99092 |
| hypothetical protein                                                                                        |      | 2509091 | 2509591 | 50          | 70.718     | 1.41436 |
| Alpha-amylase (EC 3.2.1.1)                                                                                  | 1751 | 2509785 | 2511677 | 85.62367865 | 97.377907  | 1.13728 |
| Electron transport complex protein rnfA                                                                     | 1750 | 2511792 | 2512421 | 22.25755167 | 39.9419714 | 1.79454 |
| hypothetical protein                                                                                        | 1749 | 2512418 | 2513044 | 73.48242812 | 87.6988818 | 1.19347 |
| hypothetical protein                                                                                        | 1748 | 2513034 | 2513534 | 136         | 152.602    | 1.12207 |
| Electron transport complex protein rnfD                                                                     | 1747 | 2513531 | 2514682 | 92.96264118 | 70.3331885 | 0.75657 |
| Electron transport complex protein rnfC                                                                     | 1746 | 2514682 | 2516178 | 211.8983957 | 222.051136 | 1.04791 |
| hypothetical protein                                                                                        | 1745 | 2516175 | 2517644 | 70.11572498 | 57.0081688 | 0.81306 |
| Integral membrane protein                                                                                   | 1744 | 2517777 | 2518265 | 293.0327869 | 270.760246 | 0.92399 |
| Ribosomal large subunit pseudouridine synthase<br>C (EC 4.2.1.70)                                           | 1743 | 2518499 | 2519656 | 40.62229905 | 40.2117545 | 0.98989 |
| 2',3'-cyclic-nucleotide 2'-phosphodiesterase (EC<br>3.1.4.16)                                               | 1742 | 2519682 | 2521652 | 517.2588832 | 595.142132 | 1.15057 |
| Xaa-Pro dipeptidase (EC 3.4.13.9)                                                                           | 1741 | 2521774 | 2522874 | 115.4545455 | 95.5877273 | 0.82793 |
| hypothetical protein                                                                                        | 1740 | 2522962 | 2523825 | 60.25492468 | 51.7543453 | 0.85892 |
| VgrG protein                                                                                                | 1739 | 2523842 | 2525602 | 77.84090909 | 85.6482955 | 1.1003  |
| hypothetical protein                                                                                        | 1738 | 2525717 | 2525851 | 14.92537313 | 6.94402985 | 0.46525 |
| Poly(A) polymerase (EC 2.7.7.19)                                                                            | 1737 | 2525932 | 2527155 | 190.5151267 | 167.383483 | 0.87858 |
| Lysophospholipase (EC 3.1.1.5); Monoglyceride<br>lipase (EC 3.1.1.23); putative                             | 1736 | 2527169 | 2528134 | 304.6632124 | 302.774093 | 0.9938  |
| 23S rRNA (Uracil-5-) -methyltransferase rumA<br>(EC 2.1.1.-)                                                | 1735 | 2528199 | 2529446 | 31.27506014 | 55.2181235 | 1.76556 |
| hypothetical protein                                                                                        | 1734 | 2529443 | 2530813 | 18.24817518 | 17.6591241 | 0.96772 |
| hypothetical protein                                                                                        | 1733 | 2530887 | 2531399 | 349.609375  | 308.955078 | 0.88372 |
| Cell division protein                                                                                       | 1732 | 2531422 | 2532510 | 202.2058824 | 236.045956 | 1.16735 |
| Uncharacterized protein TP_0753                                                                             | 1731 | 2532485 | 2532817 | 75.30120482 | 30.8298193 | 0.40942 |
| tRNA-i(6)A37 methylthiotransferase                                                                          | 1730 | 2532827 | 2534170 | 78.92777364 | 109.470588 | 1.38697 |
| hypothetical protein                                                                                        | 1729 | 2534192 | 2534563 | 229.1105121 | 248.300539 | 1.08376 |
| hypothetical protein                                                                                        |      | 2534710 | 2535153 | 94.80812641 | 81.9176072 | 0.86404 |
| Ribosomal RNA small subunit methyltransferase<br>D (EC 2.1.1.-)                                             | 1727 | 2535163 | 2535693 | 24.52830189 | 31.6018868 | 1.28838 |

|                                                                                                                                                         |              |                    |                    |                            |                          |                    |
|---------------------------------------------------------------------------------------------------------------------------------------------------------|--------------|--------------------|--------------------|----------------------------|--------------------------|--------------------|
| Uncharacterized protein TP_0066                                                                                                                         | 1726         | 2535757            | 2536104            | 216.1383285                | 166.256484               | 0.76921            |
| TPR domain protein                                                                                                                                      | 1725         | 2536097            | 2537254            | 243.7337943                | 198.646067               | 0.81501            |
| 23S rRNA methyltransferase and<br>Florfenicol/chloramphenicol resistance protein /<br>Radical SAM family enzyme, UPF0063 family<br>hypothetical protein | 1723<br>1724 | 2537254<br>2538305 | 2538339<br>2538421 | 178.2086796<br>68.96551724 | 189.021237<br>72.1939655 | 1.06067<br>1.04681 |
| Ribose-phosphate pyrophosphokinase (EC<br>2.7.6.1)<br>hypothetical protein                                                                              | 1722<br>1721 | 2538471<br>2539582 | 2539571<br>2540712 | 167.2727273<br>69.91150442 | 161.568636<br>72.4637168 | 0.9659<br>1.03651  |
| hypothetical protein                                                                                                                                    |              | 2540718            | 2541740            | 89.04109589                | 66.4642857               | 0.74645            |
| Ribulose-phosphate 3-epimerase (EC 5.1.3.1)<br>TPR domain protein                                                                                       | 1719<br>1718 | 2541826<br>2542558 | 2542575<br>2543544 | 61.41522029<br>362.0689655 | 108.082109<br>227.434584 | 1.75986<br>0.62815 |
| Transcription elongation factor GreA                                                                                                                    | 1717         | 2543578            | 2546271            | 246.1938359                | 219.063127               | 0.8898             |
| PBS lyase HEAT-like repeat domain protein                                                                                                               | 1716         | 2546302            | 2547939            | 119.1203421                | 131.872938               | 1.10706            |
| tRNA-guanine transglycosylase (EC 2.4.2.29)                                                                                                             | 1715         | 2547936            | 2549078            | 154.2506573                | 101.939089               | 0.66087            |
| Transcriptional regulator, TetR family<br>hypothetical protein                                                                                          | 1714<br>1713 | 2549303<br>2549953 | 2549923<br>2550090 | 116.1290323<br>167.8832117 | 75.0403226<br>95.0875912 | 0.64618<br>0.56639 |
| Protein tyrosine phosphatase (EC 3.1.3.48)<br>hypothetical protein                                                                                      | 1712<br>1711 | 2550246<br>2551986 | 2551961<br>2552780 | 1665.889213<br>816.1209068 | 1390.05306<br>526.189547 | 0.83442<br>0.64474 |
| FOG: CheY-like receiver                                                                                                                                 | 1710         | 2552970            | 2556059            | 27.19326643                | 21.6885724               | 0.79757            |
| Transcriptional regulator, luxR family, associated<br>with agmatine catabolism                                                                          | 1709         | 2556079            | 2557518            | 25.71230021                | 14.8724809               | 0.57842            |
| Glycerol-3-phosphate ABC transporter,<br>periplasmic glycerol-3-phosphate-binding protein<br>(TC 3.A.1.1.3)<br>hypothetical protein                     | 1708         | 2557522            | 2558832            | 22.13740458                | 14.2061069               | 0.64172            |
| hypothetical protein                                                                                                                                    |              | 2559089            | 2559232            | 0                          | 0                        | #DIV/0!            |
| hypothetical protein                                                                                                                                    | 1706         | 2559235            | 2559414            | 0                          | 0                        | #DIV/0!            |
| Methyl-accepting chemotaxis protein                                                                                                                     | 1705         | 2559411            | 2561594            | 2.290426019                | 0.85249656               | 0.3722             |
| Response regulator                                                                                                                                      | 1704         | 2561634            | 2562731            | 0                          | 3.3928897                | #DIV/0!            |
| Anaerobic sulfite reductase subunit C (EC 1.8.1.-)<br>Anaerobic sulfite reductase subunit B                                                             | 1703<br>1702 | 2562789<br>2563762 | 2563751<br>2564556 | 3.118503119<br>1.259445844 | 1.93451143<br>3.51574307 | 0.62033<br>2.7915  |
| Anaerobic sulfite reductase subunit A                                                                                                                   | 1701         | 2564543            | 2565571            | 0.972762646                | 0                        | 0                  |
| transcriptional regulator, Crp/Fnr family<br>hypothetical protein                                                                                       | 1700<br>1699 | 2565628<br>2566494 | 2566314<br>2566727 | 10.20408163<br>141.6309013 | 4.06924198<br>187.697425 | 0.39879<br>1.32526 |
| hypothetical protein                                                                                                                                    | 1698         | 2566720            | 2566863            | 76.92307692                | 45.548951                | 0.59214            |
| hypothetical protein                                                                                                                                    | 1697         | 2566847            | 2566966            | 0                          | 0                        | #DIV/0!            |
| Methionine ABC transporter ATP-binding protein                                                                                                          | 1696         | 2566966            | 2567775            | 102.5957973                | 156.425216               | 1.52467            |
| ABC transporter permease protein                                                                                                                        | 1695         | 2567772            | 2568704            | 121.5053763                | 110.05914                | 0.9058             |
| ABC transporter substrate-binding protein                                                                                                               | 1694         | 2568717            | 2569712            | 222.1105528                | 280.552764               | 1.26312            |
| hypothetical protein                                                                                                                                    | 1693         | 2569738            | 2569902            | 12.19512195                | 11.347561                | 0.9305             |
| hypothetical protein                                                                                                                                    | 1692         | 2569923            | 2570234            | 41.80064309                | 50.8633441               | 1.21681            |
| Plasmid stabilization system antitoxin protein                                                                                                          | 1691         | 2570224            | 2570529            | 81.96721311                | 45.7622951               | 0.5583             |
| Adenylate cyclase (EC 4.6.1.1)                                                                                                                          | 1690         | 2570627            | 2572654            | 137.1484953                | 154.241737               | 1.12463            |
| Magnesium and cobalt efflux protein corC                                                                                                                | 1689         | 2572706            | 2573506            | 306.25                     | 236.114375               | 0.77099            |
| predicted metal-dependent hydrolase                                                                                                                     | 1688         | 2573507            | 2573977            | 195.7446809                | 85.1308511               | 0.43491            |
| Membrane protein containing HD superfamily<br>hydrolase domain, YQFF ortholog                                                                           | 1687         | 2573978            | 2576392            | 117.6470588                | 124.888981               | 1.06156            |
| Phosphate starvation-inducible protein PhoH,<br>predicted ATPase                                                                                        | 1686         | 2576367            | 2577425            | 194.7069943                | 223.390359               | 1.14732            |

|                                                                                                  |      |         |         |             |            |         |
|--------------------------------------------------------------------------------------------------|------|---------|---------|-------------|------------|---------|
| Alanine racemase (EC 5.1.1.1)                                                                    | 1685 | 2577954 | 2579075 | 95.45049063 | 148.581178 | 1.55663 |
| TRAP-type C4-dicarboxylate transport system, large permease component                            | 1684 | 2579075 | 2580985 | 62.30366492 | 65.7683246 | 1.05561 |
| TRAP-type transport system, periplasmic component, predicted N-acetylneuraminate-binding protein | 1683 | 2580991 | 2581974 | 342.8280773 | 334.146999 | 0.97468 |
| Uncharacterized protein TP_0956                                                                  | 1682 | 2582117 | 2583049 | 317.5965665 | 325.475322 | 1.02481 |
| Phosphoglucomutase (EC 5.4.2.2)                                                                  | 1681 | 2583058 | 2584836 | 340.509915  | 356.911331 | 1.04817 |
| hypothetical protein                                                                             | 1680 | 2584932 | 2585348 | 151.4423077 | 143.153846 | 0.94527 |
| hypothetical protein                                                                             | 1679 | 2585645 | 2585812 | 11.9760479  | 11.1437126 | 0.9305  |
| hypothetical protein                                                                             |      | 2585884 | 2586003 | 25.21008403 | 23.4579832 | 0.9305  |
| hypothetical protein                                                                             | 1677 | 2586103 | 2586363 | 326.9230769 | 640.613462 | 1.95952 |
| Oxaloacetate decarboxylase alpha chain (EC 4.1.1.3)                                              | 1676 | 2586380 | 2588437 | 463.7822071 | 647.324016 | 1.39575 |
| Oxaloacetate decarboxylase beta chain (EC 4.1.1.3)                                               | 1675 | 2588508 | 2589911 | 369.7359029 | 593.102427 | 1.60412 |
| hypothetical protein                                                                             | 1674 | 2590171 | 2590293 | 0           | 0          | #DIV/0! |
| Iron(III) ABC transporter, solute-binding protein                                                | 1672 | 2590408 | 2591502 | 11.88299817 | 13.6087751 | 1.14523 |
| hypothetical protein                                                                             | 1673 | 2591487 | 2591603 | 17.24137931 | 16.0431034 | 0.9305  |
| Vitamin B12 ABC transporter, permease component BtuC                                             | 1671 | 2591554 | 2592558 | 5.976095618 | 7.41434263 | 1.24067 |
| Iron(III) ABC transporter, ATP-binding protein                                                   | 1670 | 2592555 | 2593370 | 4.90797546  | 4.56687117 | 0.9305  |
| Iron(III) ABC transporter, solute-binding protein                                                | 1669 | 2593392 | 2594465 | 16.77539609 | 27.750233  | 1.65422 |
| Molybdopterin biosynthesis protein A                                                             | 1668 | 2594482 | 2595693 | 101.5689513 | 76.8373245 | 0.7565  |
| ABC transporter, permease protein                                                                | 1667 | 2595789 | 2599031 | 45.95928439 | 47.070327  | 1.02417 |
| ABC transporter, ATP-binding protein                                                             | 1666 | 2599031 | 2599732 | 87.01854494 | 84.9529244 | 0.97626 |
| hypothetical protein                                                                             | 1665 | 2599867 | 2601156 | 54.3056633  | 75.7971296 | 1.39575 |
| Methyl-accepting chemotaxis protein                                                              | 1664 | 2601244 | 2603319 | 65.72295248 | 82.3243175 | 1.2526  |
| hypothetical protein                                                                             | 1663 | 2603502 | 2604737 | 96.3562753  | 112.262753 | 1.16508 |
| hypothetical protein                                                                             | 1662 | 2604739 | 2605119 | 86.84210526 | 107.742105 | 1.24067 |
| Positive regulator of CheA protein activity (CheW)                                               | 1661 | 2605839 | 2606306 | 70.66381156 | 67.745182  | 0.9587  |
| hypothetical protein                                                                             | 1660 | 2606321 | 2606881 | 50          | 46.525     | 0.9305  |
| Chemotaxis response regulator protein-glutamate methyltransferase CheB (EC 3.1.1.61)             | 1659 | 2606874 | 2607884 | 97.02970297 | 68.1752475 | 0.70262 |
| Chemotaxis protein methyltransferase CheR (EC 2.1.1.80)                                          | 1658 | 2607881 | 2609521 | 49.3902439  | 54.4682927 | 1.10281 |
| Methyl-accepting chemotaxis protein                                                              | 1657 | 2609534 | 2611612 | 86.62175168 | 83.2882579 | 0.96152 |
| Methyl-accepting chemotaxis protein                                                              | 1656 | 2611609 | 2613174 | 83.70607029 | 105.238658 | 1.25724 |
| Chemotaxis protein CheA (EC 2.7.3.-)                                                             | 1655 | 2613183 | 2615531 | 60.90289608 | 85.5996593 | 1.40551 |
| Adenylate cyclase (EC 4.6.1.1)                                                                   | 1654 | 2615524 | 2617413 | 62.46691371 | 58.6180519 | 0.93839 |
| Foldase protein prsA precursor (EC 5.2.1.8)                                                      | 1653 | 2617483 | 2617761 | 273.381295  | 153.967626 | 0.5632  |
| Response regulator                                                                               | 1652 | 2617784 | 2619037 | 229.8483639 | 227.241022 | 0.98866 |
| UPF0178 protein TP_0845                                                                          | 1651 | 2619044 | 2619514 | 48.93617021 | 83.1510638 | 1.69917 |
| Mannose-6-phosphate isomerase (EC 5.3.1.8)                                                       | 1650 | 2619511 | 2620758 | 97.03287891 | 79.8424218 | 0.82284 |
| Uncharacterized protein TP_0846                                                                  | 1649 | 2620776 | 2621075 | 133.7792642 | 152.489967 | 1.13986 |
| Uncharacterized protein TP_0847                                                                  | 1648 | 2621086 | 2621586 | 516         | 481.999    | 0.93411 |
| LSU ribosomal protein L20p                                                                       | 1647 | 2621598 | 2621966 | 673.0769231 | 981.626374 | 1.45842 |
| LSU ribosomal protein L35p                                                                       | 1646 | 2622051 | 2622251 | 760.4166667 | 877.190104 | 1.15357 |
| Translation initiation factor 3                                                                  | 1645 | 2622269 | 2622784 | 1506.796117 | 1472.53883 | 0.97726 |
| hypothetical protein                                                                             |      | 2622852 | 2623049 | 25.38071066 | 18.893401  | 0.7444  |
| hypothetical protein                                                                             | 1643 | 2623029 | 2623661 | 33.2278481  | 64.7816456 | 1.94962 |

|                                                                                      |      |         |         |             |            |         |
|--------------------------------------------------------------------------------------|------|---------|---------|-------------|------------|---------|
| Large repetitive protein                                                             | 1642 | 2623730 | 2627794 | 326.5255906 | 337.489419 | 1.03358 |
| hypothetical protein                                                                 | 1641 | 2627837 | 2628055 | 36.69724771 | 12.8050459 | 0.34894 |
| Cell surface protein                                                                 | 1640 | 2628012 | 2628833 | 87.69792935 | 80.4695493 | 0.91758 |
| Conserved domain protein                                                             | 1639 | 2628860 | 2629717 | 169.1948658 | 109.662194 | 0.64814 |
| Large repetitive protein                                                             | 1638 | 2629908 | 2647037 | 172.8647323 | 171.226341 | 0.99052 |
| 3-isopropylmalate dehydratase large subunit (EC 4.2.1.33)                            | 1637 | 2647275 | 2648567 | 481.4241486 | 515.664087 | 1.07112 |
| 3-isopropylmalate dehydratase small subunit (EC 4.2.1.33)                            | 1635 | 2648610 | 2649134 | 213.740458  | 221.97042  | 1.0385  |
| hypothetical protein                                                                 | 1636 | 2649131 | 2650039 | 31.93832599 | 15.371696  | 0.48129 |
| hypothetical protein                                                                 | 1634 | 2650036 | 2650668 | 17.40506329 | 20.6123418 | 1.18427 |
|                                                                                      |      |         |         |             |            |         |
| sensory box histidine kinase/response regulator                                      | 1633 | 2650725 | 2652728 | 11.96670135 | 15.9763267 | 1.33507 |
| Conserved protein                                                                    | 1631 | 2652768 | 2653199 | 134.5707657 | 114.423434 | 0.85028 |
| Serine phosphatase RsbU, regulator of sigma subunit                                  | 1632 | 2653171 | 2654346 | 146.3829787 | 124.330638 | 0.84935 |
| Serine phosphatase RsbU, regulator of sigma subunit                                  | 1630 | 2654359 | 2655531 | 98.97610922 | 65.8971843 | 0.66579 |
| hypothetical protein                                                                 | 1629 | 2655556 | 2656890 | 67.46626687 | 77.4254123 | 1.14762 |
| Glycosyltransferases involved in cell wall biogenesis                                | 1628 | 2656883 | 2657866 | 62.05493388 | 61.5284842 | 0.99152 |
| Cysteinyl-tRNA synthetase (EC 6.1.1.16)                                              | 1627 | 2657921 | 2659354 | 301.6997167 | 293.252479 | 0.972   |
| RNA polymerase sigma-54 factor rpoN                                                  | 1626 | 2659392 | 2659946 | 151.6245487 | 105.814982 | 0.69788 |
| hypothetical protein                                                                 | 1625 | 2659936 | 2660514 | 185.1211073 | 167.425606 | 0.90441 |
| hypothetical protein                                                                 | 1624 | 2660511 | 2661059 | 156.9343066 | 142.631387 | 0.90886 |
| Transglutaminase-like enzymes, putative cysteine proteases                           | 1623 | 2661062 | 2662690 | 129.6068796 | 142.318489 | 1.09808 |
| Uridylate kinase (EC 2.7.4.-)                                                        | 1622 | 2662714 | 2663397 | 117.1303075 | 122.61347  | 1.04681 |
|                                                                                      |      |         |         |             |            |         |
| Pyrophosphate--fructose 6-phosphate 1-phosphotransferase, beta subunit (EC 2.7.1.90) | 1621 | 2663475 | 2665130 | 303.3232628 | 244.010272 | 0.80446 |
| ATP-dependent DNA helicase RecQ                                                      | 1620 | 2665215 | 2667167 | 47.64344262 | 58.6329406 | 1.23066 |
| Xanthosine/inosine triphosphate pyrophosphatase ; HAM1 protein homolog               | 1619 | 2667182 | 2667775 | 148.3979764 | 161.621417 | 1.08911 |
| hypothetical protein                                                                 | 1618 | 2667846 | 2668328 | 43.56846473 | 52.123444  | 1.19636 |
| ATP-dependent DNA helicase Rep                                                       | 1617 | 2668334 | 2670382 | 90.46454768 | 91.9124694 | 1.01601 |
| hypothetical protein                                                                 | 1616 | 2670489 | 2671607 | 29.51699463 | 19.9749553 | 0.67673 |
| tRNA nucleotidyltransferase, A-adding (EC 2.7.7.-)                                   | 1615 | 2671607 | 2672923 | 53.19148936 | 69.9996201 | 1.31599 |
| Transcriptional regulator, GntR family                                               | 1614 | 2673100 | 2673795 | 34.5323741  | 45.5208633 | 1.31821 |
| hypothetical protein                                                                 |      | 2673814 | 2673930 | 0           | 0          | #DIV/0! |
| hypothetical protein                                                                 | 1612 | 2674000 | 2675001 | 2.997002997 | 4.64785215 | 1.55083 |
| Beta-glucosidase (EC 3.2.1.21)                                                       | 1611 | 2675038 | 2676420 | 3.617945007 | 4.71309696 | 1.3027  |
| Multiple sugar ABC transporter, substrate-binding protein                            | 1610 | 2676443 | 2677741 | 6.933744222 | 9.31933744 | 1.34406 |
| Multiple sugar ABC transporter, membrane-spanning permease protein MsmF              | 1609 | 2677815 | 2678699 | 0           | 1.05260181 | #DIV/0! |
| Multiple sugar ABC transporter, membrane-spanning permease protein MsmG              | 1608 | 2678702 | 2679550 | 1.179245283 | 2.19457547 | 1.861   |
| Oxidoreductase, aldo/keto reductase family                                           | 1607 | 2679554 | 2680471 | 5.452562704 | 0          | 0       |
| Dihydroxy-acid dehydratase (EC 4.2.1.9)                                              | 1606 | 2680491 | 2682209 | 8.149010477 | 5.95779977 | 0.73111 |
| Beta-glucosidase (EC 3.2.1.21)                                                       | 1605 | 2682282 | 2683631 | 103.7805782 | 142.782431 | 1.37581 |

|                                                                                                                                    |      |         |         |             |            |         |
|------------------------------------------------------------------------------------------------------------------------------------|------|---------|---------|-------------|------------|---------|
| Beta-mannosidase (EC 3.2.1.25)                                                                                                     | 1604 | 2683649 | 2686153 | 141.3738019 | 128.203874 | 0.90684 |
| Multiple sugar ABC transporter, membrane-spanning permease protein MsmG                                                            | 1603 | 2686157 | 2686996 | 94.15971395 | 83.1793802 | 0.88339 |
| Multiple sugar ABC transporter, membrane-spanning permease protein MsmF                                                            | 1602 | 2687000 | 2687899 | 156.8409344 | 169.746385 | 1.08228 |
| Predicted beta-xyloside ABC transporter, substrate-binding component                                                               | 1601 | 2687996 | 2689345 | 1714.712472 | 2070.1714  | 1.2073  |
| Chitobiose phosphorylase (EC 2.4.1.-)                                                                                              | 1600 | 2689480 | 2692044 | 59.6723869  | 83.4691888 | 1.39879 |
| Carboxylesterase, type B precursor                                                                                                 | 1599 | 2692216 | 2693931 | 362.0991254 | 1452.99067 | 4.01269 |
| hypothetical protein                                                                                                               | 1598 | 2693907 | 2694065 | 0           | 11.778481  | #DIV/0! |
| hypothetical protein                                                                                                               |      | 2694453 | 2694605 | 0           | 0          | #DIV/0! |
| hypothetical protein                                                                                                               | 1592 | 2700048 | 2700179 | 22.90076336 | 0          | 0       |
| hypothetical protein                                                                                                               | 1591 | 2700154 | 2700537 | 86.1618799  | 104.468668 | 1.21247 |
| hypothetical protein                                                                                                               | 1590 | 2700641 | 2700802 | 267.0807453 | 225.400621 | 0.84394 |
| Periplasmic [Fe] hydrogenase (EC 1.12.7.2)                                                                                         | 1589 | 2700764 | 2702755 | 99.94977398 | 120.109744 | 1.2017  |
| Translation elongation factor G                                                                                                    | 1588 | 2702896 | 2704938 | 241.4299706 | 193.208619 | 0.80027 |
| Carboxylesterase, type B precursor                                                                                                 | 1587 | 2705005 | 2709777 | 67.47694887 | 35.2934828 | 0.52305 |
| hypothetical protein                                                                                                               | 1585 | 2709765 | 2709944 | 22.34636872 | 0          | 0       |
|                                                                                                                                    |      |         |         |             |            |         |
| sensory box histidine kinase/response regulator                                                                                    | 1586 | 2709934 | 2713692 | 100.615467  | 82.6668451 | 0.82161 |
| Chromosome partitioning protein parB / Stage 0 sporulation protein J                                                               | 1584 | 2713706 | 2714098 | 104.5918367 | 102.070153 | 0.97589 |
| Multimodular transpeptidase-transglycosylase (EC 2.4.1.129) (EC 3.4.-.-)                                                           | 1583 | 2714193 | 2716913 | 173.1617647 | 223.388419 | 1.29006 |
| Iron-sulfur flavoprotein                                                                                                           | 1582 | 2716925 | 2717548 | 12.84109149 | 11.9486356 | 0.9305  |
| hypothetical protein                                                                                                               |      | 2718081 | 2718194 | 17.69911504 | 0          | 0       |
| hypothetical protein                                                                                                               | 1580 | 2718403 | 2719404 | 117.8821179 | 131.999001 | 1.11975 |
| Membrane proteins related to metalloendopeptidases                                                                                 | 1579 | 2719401 | 2720381 | 179.5918367 | 172.807143 | 0.96222 |
| Ferredoxin                                                                                                                         | 1578 | 2720418 | 2720588 | 7100        | 7427.57941 | 1.04614 |
| Glycogen branching enzyme, archaeal type (EC 2.4.1.18)                                                                             | 1577 | 2720701 | 2722281 | 81.64556962 | 113.662342 | 1.39214 |
| Outer membrane protein                                                                                                             | 1576 | 2722282 | 2722974 | 104.0462428 | 94.1257225 | 0.90465 |
| Multimeric flavodoxin WrbA family protein                                                                                          | 1575 | 2723073 | 2723690 | 79.4165316  | 131.205024 | 1.65211 |
| Serine phosphatase RsbU, regulator of sigma subunit                                                                                | 1574 | 2723824 | 2726391 | 75.84050039 | 67.2957389 | 0.88733 |
| Probable 3-phenylpropionic acid transporter                                                                                        | 1573 | 2726477 | 2727634 | 72.60155575 | 77.2065687 | 1.06343 |
| D-alanyl-D-alanine carboxypeptidase (EC 3.4.16.4)                                                                                  | 1572 | 2727684 | 2728529 | 73.37278107 | 50.6544379 | 0.69037 |
|                                                                                                                                    |      |         |         |             |            |         |
| GTP pyrophosphokinase (EC 2.7.6.5), (p)ppGpp synthetase II / Guanosine-3',5'-bis(diphosphate) 3' pyrophosphohydrolase (EC 3.1.7.2) | 1571 | 2728556 | 2729125 | 179.2618629 | 148.814587 | 0.83015 |
| Valyl-tRNA synthetase (EC 6.1.1.9)                                                                                                 | 1570 | 2729135 | 2731825 | 208.1784387 | 185.408178 | 0.89062 |
|                                                                                                                                    |      |         |         |             |            |         |
| Multi antimicrobial extrusion protein (Na <sup>+</sup> )/drug antiporter), MATE family of MDR efflux pumps                         | 1569 | 2731914 | 2733287 | 56.80990532 | 23.0422433 | 0.4056  |
| hypothetical protein                                                                                                               |      | 2733303 | 2733530 | 8.810572687 | 28.6938326 | 3.25675 |
| hypothetical protein                                                                                                               | 1567 | 2733502 | 2733618 | 68.96551724 | 56.1508621 | 0.81419 |
| hypothetical protein                                                                                                               |      | 2733696 | 2733824 | 429.6875    | 312.589844 | 0.72748 |
| hypothetical protein                                                                                                               |      | 2733846 | 2733977 | 22.90076336 | 14.2061069 | 0.62033 |
| Proline-specific permease proY                                                                                                     | 1564 | 2734319 | 2735692 | 23.30662782 | 26.4308084 | 1.13405 |



|                                                  |      |         |         |             |            |         |
|--------------------------------------------------|------|---------|---------|-------------|------------|---------|
| COG0523: Putative GTPases (G3E family)           |      | 2735711 | 2736307 | 78.8590604  | 39.0310403 | 0.49495 |
| hypothetical protein                             | 1562 | 2736463 | 2736750 | 27.87456446 | 12.9686411 | 0.46525 |
| LysR family regulatory protein CidR              | 1561 | 2736893 | 2737801 | 7.709251101 | 9.22301762 | 1.19636 |
| Uroporphyrinogen-III decarboxylase               | 1560 | 2737930 | 2738973 | 35.47459252 | 41.930489  | 1.18199 |
| Permeases of the major facilitator superfamily   | 1559 | 2739043 | 2740224 | 52.49788315 | 60.6676545 | 1.15562 |
| Uroporphyrinogen-III decarboxylase-like          | 1558 | 2740341 | 2741351 | 7.920792079 | 5.52772277 | 0.69788 |
| hypothetical protein                             |      | 2741398 | 2741547 | 0           | 0          | #DIV/0! |
| 5-methyltetrahydrofolate--homocysteine           |      |         |         |             |            |         |
| methyltransferase (EC 2.1.1.13)                  | 1556 | 2741601 | 2742401 | 782.5       | 781.62     | 0.99888 |
| Corrinoid methyltransferase protein              | 1555 | 2742463 | 2743092 | 1647.058824 | 2423.14626 | 1.4712  |
| Conserved protein                                | 1554 | 2743168 | 2743710 | 223.2472325 | 231.766605 | 1.03816 |
| probable electron transfer protein               | 1553 | 2743714 | 2745528 | 117.9713341 | 122.596196 | 1.0392  |
| Uroporphyrinogen-III decarboxylase               | 1552 | 2745634 | 2746638 | 106.5737052 | 58.3879482 | 0.54786 |
| hypothetical protein                             |      | 2746604 | 2746729 | 24          | 0          | 0       |
| Regulator of polyketide synthase expression      | 1550 | 2746835 | 2748352 | 22.41265656 | 11.6542518 | 0.51999 |
| Regulator of polyketide synthase expression      | 1549 | 2748374 | 2749945 | 37.55569701 | 34.3532782 | 0.91473 |
| 4-hydroxy-3-methylbut-2-enyl diphosphate         |      |         |         |             |            |         |
| reductase (EC 1.17.1.2)                          | 1548 | 2749942 | 2750817 | 61.71428571 | 109.533143 | 1.77484 |
| Protein-export membrane protein secF (TC         |      |         |         |             |            |         |
| 3.A.5.1.1)                                       | 1547 | 2750848 | 2752068 | 276.2295082 | 408.809836 | 1.47996 |
| Protein-export membrane protein secD (TC         |      |         |         |             |            |         |
| 3.A.5.1.1)                                       | 1546 | 2752068 | 2753723 | 364.9546828 | 574.604834 | 1.57446 |
| Preprotein translocase subunit YajC (TC          |      |         |         |             |            |         |
| 3.A.5.1.1)                                       | 1545 | 2753892 | 2754317 | 447.0588235 | 361.252941 | 0.80807 |
| hypothetical protein                             | 1544 | 2754415 | 2754705 | 220.6896552 | 154.013793 | 0.69788 |
| Rubredoxin                                       | 1543 | 2754801 | 2754962 | 403.7267081 | 716.658385 | 1.77511 |
| Rubrerythrin                                     | 1542 | 2754972 | 2755547 | 485.2173913 | 365.726957 | 0.75374 |
| hypothetical protein                             |      | 2755606 | 2755740 | 67.1641791  | 62.4962687 | 0.9305  |
| Endoglucanase D precursor (EC 3.2.1.4) (Endo-    |      |         |         |             |            |         |
| 1,4-beta-glucanase D) (Cellulase D)              | 1540 | 2756085 | 2757875 | 200.5586592 | 267.713687 | 1.33484 |
| TPR domain protein, putative component of TonB   |      |         |         |             |            |         |
| system                                           | 1539 | 2758274 | 2760046 | 54.17607223 | 74.0409142 | 1.36667 |
| hypothetical protein                             | 1538 | 2760043 | 2760681 | 65.830721   | 91.8832288 | 1.39575 |
| ortholog to <i>Borrelia burgdorferi</i> BB0398   | 1537 | 2760746 | 2761846 | 84.54545455 | 114.197727 | 1.35073 |
| hypothetical protein                             | 1536 | 2761830 | 2761958 | 0           | 0          | #DIV/0! |
| Membrane-bound lytic murein transglycosylase D   |      |         |         |             |            |         |
| precursor (EC 3.2.1.-)                           | 1535 | 2761909 | 2763309 | 50.71428571 | 73.1107143 | 1.44162 |
| OmpA family protein                              | 1534 | 2763324 | 2764211 | 104.8478016 | 154.209132 | 1.47079 |
| Oligopeptide ABC transporter, periplasmic        |      |         |         |             |            |         |
| oligopeptide-binding protein oppA (TC 3.A.1.5.1) | 1533 | 2764275 | 2766077 | 109.1922006 | 129.5961   | 1.18686 |
| Oligopeptide transport system permease protein   |      |         |         |             |            |         |
| oppB (TC 3.A.1.5.1)                              | 1532 | 2766085 | 2767185 | 40.90909091 | 73.5940909 | 1.79897 |
| Peptide/opine/nickel uptake family ABC           |      |         |         |             |            |         |
| transporter, permease/ATP- binding protein       | 1531 | 2767193 | 2769508 | 105.8315335 | 124.602592 | 1.17737 |
| Oligopeptide transport ATP-binding protein oppF  |      |         |         |             |            |         |
| (TC 3.A.1.5.1)                                   | 1530 | 2769509 | 2770492 | 91.55645982 | 110.751272 | 1.20965 |
| Hypothetical ATP-binding protein UPF0042,        |      |         |         |             |            |         |
| contains P-loop                                  | 1529 | 2770572 | 2771360 | 83.75634518 | 105.094543 | 1.25477 |
| Maltose/maltodextrin transport ATP-binding       |      |         |         |             |            |         |
| protein MalK (EC 3.6.3.19); Multiple sugar ABC   |      |         |         |             |            |         |
| transporter, ATP-binding protein                 | 1528 | 2771388 | 2772500 | 195.1438849 | 211.705486 | 1.08487 |



|                                                                                                                            |      |         |         |             |            |         |
|----------------------------------------------------------------------------------------------------------------------------|------|---------|---------|-------------|------------|---------|
| Ferric iron ABC transporter, permease protein                                                                              | 1527 | 2772502 | 2774295 | 143.8929169 | 133.373397 | 0.92689 |
| hypothetical protein                                                                                                       | 1526 | 2774393 | 2775523 | 275.2212389 | 301.383186 | 1.09506 |
| hypothetical protein                                                                                                       | 1525 | 2775712 | 2775825 | 8.849557522 | 0          | 0       |
| ATP-dependent RNA helicase RhlB                                                                                            |      | 2775799 | 2777685 | 384.9016481 | 527.332802 | 1.37005 |
| ABC transporter, ATP-binding protein                                                                                       | 1523 | 2777740 | 2779437 | 240.5437352 | 316.216017 | 1.31459 |
| hypothetical protein                                                                                                       | 1522 | 2779451 | 2780704 | 19.15403033 | 14.1097366 | 0.73665 |
| Ribose ABC transport system, periplasmic ribose-binding protein RbsB (TC 3.A.1.2.1)                                        | 1521 | 2780724 | 2781710 | 3.042596349 | 9.43711968 | 3.10167 |
| Ribose ABC transport system, permease protein RbsC (TC 3.A.1.2.1)                                                          | 1520 | 2781769 | 2782731 | 0           | 0.96725572 | #DIV/0! |
| ABC-type sugar transport system, ATP-binding protein (EC 3.6.3.17)                                                         | 1519 | 2782709 | 2784217 | 0.663129973 | 1.23408488 | 1.861   |
| Transcriptional regulator of rhamnose utilization, AraC family                                                             | 1518 | 2784355 | 2785272 | 40.34896401 | 24.3533261 | 0.60357 |
| Uncharacterized protein TP_0369 precursor                                                                                  | 1517 | 2785318 | 2786865 | 53.65223012 | 57.7427279 | 1.07624 |
| hypothetical protein                                                                                                       | 1516 | 2786862 | 2787296 | 357.1428571 | 132.928571 | 0.3722  |
| hypothetical protein                                                                                                       |      | 2787281 | 2787394 | 0           | 0          | #DIV/0! |
| Ribokinase (EC 2.7.1.15)                                                                                                   | 1514 | 2787445 | 2788359 | 25.16411379 | 35.6318381 | 1.41598 |
| Catabolite control protein A                                                                                               | 1513 | 2788356 | 2789339 | 35.60528993 | 39.7568667 | 1.1166  |
| 6-phospho-beta-glucosidase (EC 3.2.1.86)                                                                                   | 1512 | 2789377 | 2790741 | 49.85337243 | 45.7063783 | 0.91682 |
| Ferric iron ABC transporter, iron-binding protein # pitA                                                                   | 1511 | 2790768 | 2791778 | 239.6039604 | 229.400495 | 0.95742 |
| Ferric iron ABC transporter, permease protein                                                                              | 1510 | 2791806 | 2793485 | 63.72840977 | 66.5038714 | 1.04355 |
| Maltose/maltodextrin transport ATP-binding protein MalK (EC 3.6.3.19); Multiple sugar ABC transporter, ATP-binding protein | 1509 | 2793498 | 2794553 | 54.02843602 | 29.9876777 | 0.55504 |
| Phosphoesterase PHP domain protein precursor                                                                               | 1508 | 2794550 | 2795443 | 26.87569989 | 18.7558791 | 0.69788 |
| hypothetical protein                                                                                                       | 1507 | 2795506 | 2795676 | 347.0588235 | 191.573529 | 0.55199 |
| Peptide chain release factor 1                                                                                             | 1506 | 2795678 | 2796763 | 386.0465116 | 401.629767 | 1.04037 |
| Methylase of polypeptide chain release factors                                                                             | 1505 | 2796775 | 2797755 | 116.3265306 | 165.211224 | 1.42024 |
| GTP pyrophosphokinase (EC 2.7.6.5), (p)ppGpp synthetase I                                                                  | 1504 | 2797760 | 2800027 | 137.6268196 | 124.778121 | 0.90664 |
| Uncharacterized protein TP_0214                                                                                            | 1503 | 2800111 | 2800311 | 1715        | 2014.5325  | 1.17465 |
| LSU ribosomal protein L17p                                                                                                 | 1502 | 2800324 | 2800863 | 1536.178108 | 1491.56215 | 0.97096 |
| DNA-directed RNA polymerase alpha subunit (EC 2.7.7.6)                                                                     | 1501 | 2800853 | 2801908 | 1078.822412 | 1030.35423 | 0.95507 |
| SSU ribosomal protein S4p (S9e)                                                                                            | 1500 | 2801918 | 2802553 | 1184.713376 | 1380.93312 | 1.16563 |
| SSU ribosomal protein S11p (S14e)                                                                                          | 1499 | 2802613 | 2802996 | 1840.73107  | 1355.66319 | 0.73648 |
| SSU ribosomal protein S13p (S18e)                                                                                          | 1498 | 2803024 | 2803389 | 2961.643836 | 2605.4     | 0.87971 |
| Preprotein translocase secY subunit (TC 3.A.5.1.1)                                                                         | 1497 | 2803614 | 2804942 | 586.4946889 | 563.383156 | 0.96059 |
| LSU ribosomal protein L15p (L27Ae)                                                                                         | 1496 | 2804942 | 2805394 | 500         | 524.950221 | 1.0499  |
| LSU ribosomal protein L30p (L7e)                                                                                           | 1495 | 2805394 | 2805579 | 843.2432432 | 1076.36216 | 1.27646 |
| SSU ribosomal protein S5p (S2e)                                                                                            | 1494 | 2805582 | 2806109 | 1607.210626 | 1885.71917 | 1.17329 |
| LSU ribosomal protein L18p (L5e)                                                                                           | 1493 | 2806118 | 2806480 | 1569.060773 | 1244.09392 | 0.79289 |
| LSU ribosomal protein L6p (L9e)                                                                                            | 1492 | 2806537 | 2807076 | 474.9536178 | 564.514842 | 1.18857 |
| SSU ribosomal protein S8p (S15Ae)                                                                                          | 1491 | 2807087 | 2807485 | 615.7760814 | 449.860051 | 0.73056 |
| SSU ribosomal protein S14p (S29e)                                                                                          | 1490 | 2807495 | 2807680 | 1316.939891 | 1591.51093 | 1.20849 |
| LSU ribosomal protein L5p (L11e)                                                                                           |      | 2807688 | 2808191 | 948.3101392 | 1017.44533 | 1.0729  |
| LSU ribosomal protein L24p (L26e)                                                                                          | 1488 | 2808237 | 2808599 | 1607.734807 | 1711.91436 | 1.0648  |
| LSU ribosomal protein L14p (L23e)                                                                                          | 1487 | 2808623 | 2808991 | 1896.73913  | 1400.80707 | 0.73853 |

|                                                                                         |      |         |         |             |            |         |
|-----------------------------------------------------------------------------------------|------|---------|---------|-------------|------------|---------|
| SSU ribosomal protein S17p (S11e)                                                       | 1486 | 2809006 | 2809314 | 1074.675325 | 664.642857 | 0.61846 |
| LSU ribosomal protein L29p (L35e)                                                       | 1485 | 2809325 | 2809546 | 1049.773756 | 1048.3914  | 0.99868 |
| LSU ribosomal protein L16p (L10e)                                                       | 1484 | 2809560 | 2809985 | 1014.117647 | 1486.61059 | 1.46592 |
| SSU ribosomal protein S3p (S3e)                                                         | 1483 | 2810053 | 2810760 | 907.6704545 | 947.682528 | 1.04408 |
| LSU ribosomal protein L22p (L17e)                                                       | 1482 | 2810761 | 2811132 | 1466.307278 | 1326.77763 | 0.90484 |
| SSU ribosomal protein S19p (S15e)                                                       | 1481 | 2811141 | 2811422 | 736.6548043 | 784.798932 | 1.06536 |
| LSU ribosomal protein L2p (L8e)                                                         | 1480 | 2811432 | 2812262 | 1043.373494 | 1097.54157 | 1.05192 |
| LSU ribosomal protein L23p (L23Ae)                                                      | 1479 | 2812286 | 2812573 | 1554.006969 | 1137.99826 | 0.7323  |
| LSU ribosomal protein L4p (L1e)                                                         | 1478 | 2812570 | 2813241 | 676.6020864 | 757.157973 | 1.11906 |
| LSU ribosomal protein L3p (L3e)                                                         | 1477 | 2813252 | 2813872 | 1358.064516 | 1484.29758 | 1.09295 |
| SSU ribosomal protein S10p (S20e)                                                       | 1476 | 2813910 | 2814218 | 1498.349835 | 1907.06436 | 1.27278 |
| Translation elongation factor Tu                                                        | 1475 | 2814291 | 2815481 | 2670.588235 | 4008.18739 | 1.50086 |
| hypothetical protein                                                                    |      | 2815446 | 2815541 | 3336.842105 | 1381.05789 | 0.41388 |
| hypothetical protein                                                                    |      | 2815811 | 2816008 | 2081.218274 | 2177.46447 | 1.04625 |
| SSU ribosomal protein S7p (S5e)                                                         | 1472 | 2816095 | 2816565 | 1091.489362 | 1221.52872 | 1.11914 |
| SSU ribosomal protein S12p (S23e)                                                       | 1471 | 2816576 | 2816950 | 2040.106952 | 3065.17647 | 1.50246 |
| hypothetical protein                                                                    | 1470 | 2817173 | 2817484 | 19.2926045  | 20.9437299 | 1.08558 |
| Prevent-host-death family protein                                                       | 1469 | 2817477 | 2817731 | 47.24409449 | 25.6437008 | 0.54279 |
| Spermidine Putrescine transport ATP-binding protein potA (TC_3.A.1.11.1)                | 1468 | 2817913 | 2819154 | 100.7252216 | 85.4770346 | 0.84862 |
| Spermidine Putrescine ABC transporter permease component potB (TC_3.A.1.11.1)           | 1467 | 2819151 | 2820056 | 22.09944751 | 30.8453039 | 1.39575 |
| Spermidine Putrescine ABC transporter permease component potC (TC_3.A.1.11.1)           | 1466 | 2820053 | 2820946 | 19.03695409 | 15.6298992 | 0.82103 |
| ABC transporter, periplasmic spermidine putrescine-binding protein potD (TC_3.A.1.11.1) | 1465 | 2820943 | 2822010 | 133.0834114 | 103.776476 | 0.77979 |
| hypothetical protein                                                                    | 1464 | 2822036 | 2822179 | 1330.985915 | 2378.67254 | 1.78715 |
| putative autotransporter protein                                                        | 1463 | 2822436 | 2823368 | 151.2875536 | 182.705472 | 1.20767 |
| putative autotransporter protein                                                        | 1462 | 2823743 | 2825947 | 137.9310345 | 156.631352 | 1.13558 |
| hypothetical protein                                                                    |      | 2826323 | 2826475 | 6.578947368 | 0          | 0       |
| Hemerythrin                                                                             | 1460 | 2826517 | 2826924 | 130.2211302 | 128.029484 | 0.98317 |
| Oligoendopeptidase F (EC 3.4.24.-)                                                      | 1459 | 2826969 | 2828774 | 122.982749  | 148.092933 | 1.20418 |
| hypothetical protein                                                                    | 1458 | 2828846 | 2829706 | 32.55813953 | 41.1151163 | 1.26282 |
| Translation elongation factor P; Translation initiation factor 5A                       | 1457 | 2830138 | 2830701 | 522.2024867 | 433.021314 | 0.82922 |
| Methyltransferase small                                                                 | 1456 | 2830844 | 2832103 | 47.65687053 | 104.949166 | 2.20218 |
| Putative pheromone precursor lipoprotein                                                | 1455 | 2832295 | 2832711 | 9.615384615 | 8.94711538 | 0.9305  |
| Putative ABC transport system ATP-binding protein                                       | 1454 | 2832708 | 2833403 | 0           | 6.6942446  | #DIV/0! |
| Putative membrane protein                                                               | 1453 | 2833443 | 2834585 | 3.50262697  | 4.07399299 | 1.16313 |
| ABC transporter permease protein                                                        | 1452 | 2834575 | 2835858 | 6.235385814 | 7.25253313 | 1.16313 |
| Putative high-affinity iron permease                                                    | 1451 | 2835860 | 2837110 | 0.8         | 2.9776     | 3.722   |
| Periplasmic protein p19 involved in high-affinity Fe2+ transport                        | 1450 | 2837228 | 2837809 | 13.76936317 | 12.8123924 | 0.9305  |
| Putative high-affinity iron permease                                                    | 1449 | 2837879 | 2839033 | 0.866551127 | 2.41897747 | 2.7915  |
| hypothetical protein                                                                    | 1448 | 2839032 | 2839295 | 0           | 3.53802281 | #DIV/0! |
| hypothetical protein                                                                    | 1447 | 2839575 | 2839766 | 52.94117647 | 27.3676471 | 0.51694 |
| PIN domain protein                                                                      | 1446 | 2839778 | 2840146 | 27.11864407 | 9.46271186 | 0.34894 |
| hypothetical protein                                                                    | 1445 | 2840181 | 2841665 | 40.43126685 | 71.4804582 | 1.76795 |
| Predicted beta-xyloside ABC transporter, ATP-binding component                          | 1444 | 2841675 | 2842520 | 62.72189349 | 31.9343195 | 0.50914 |

|                                                                         |      |         |         |             |            |         |
|-------------------------------------------------------------------------|------|---------|---------|-------------|------------|---------|
| Multiple sugar ABC transporter, membrane-spanning permease protein MsmF | 1443 | 2842530 | 2843411 | 51.07832009 | 53.8654938 | 1.05457 |
| Multiple sugar ABC transporter, substrate-binding protein               | 1442 | 2843514 | 2844821 | 658.7605203 | 931.923871 | 1.41466 |
| hypothetical protein                                                    | 1441 | 2844968 | 2845783 | 67.48466258 | 69.6447853 | 1.03201 |
| DNA-damage-inducible protein J                                          | 1440 | 2845993 | 2846259 | 82.70676692 | 27.9849624 | 0.33836 |
| AviX3                                                                   | 1439 | 2846252 | 2846518 | 52.63157895 | 69.962406  | 1.32929 |
| hypothetical protein                                                    | 1438 | 2846771 | 2852821 | 2.148760331 | 1.69181818 | 0.78735 |
| hypothetical protein                                                    | 1437 | 2852832 | 2854058 | 1.63132137  | 0.75897227 | 0.46525 |
| hypothetical protein                                                    | 1436 | 2854711 | 2854950 | 0           | 0          | #DIV/0! |
| Putative transposase                                                    |      | 2854958 | 2855353 | 5.83090379  | 2.71282799 | 0.46525 |
| transposase, mutator family                                             |      | 2855368 | 2856048 | 7.385524372 | 8.24667651 | 1.1166  |
| hypothetical protein                                                    | 1433 | 2856340 | 2856606 | 0           | 0          | #DIV/0! |
| hypothetical protein                                                    | 1432 | 2856966 | 2857139 | 0           | 0          | #DIV/0! |
| hypothetical protein                                                    |      | 2857119 | 2857247 | 0           | 0          | #DIV/0! |
| Helix-turn-helix domain protein                                         | 1430 | 2857398 | 2857748 | 62.85714286 | 21.2685714 | 0.33836 |
| hypothetical protein                                                    | 1429 | 2857787 | 2858029 | 0           | 0          | #DIV/0! |
| hypothetical protein                                                    |      | 2858084 | 2858206 | 8.196721311 | 0          | 0       |
| Conserved domain protein                                                | 1427 | 2858314 | 2858664 | 128.5714286 | 93.05      | 0.72372 |
| Uncharacterized protein TP_0969 precursor                               | 1426 | 2858818 | 2860254 | 29.94428969 | 25.2712396 | 0.84394 |
| Probable Co/Zn/Cd efflux system membrane fusion protein                 | 1425 | 2860241 | 2861251 | 88.11881188 | 63.5688119 | 0.7214  |
| Cell division transporter, ATP-binding protein ftsE (TC 3.A.5.1.1)      |      | 2861251 | 2861931 | 27.94117647 | 62.9455882 | 2.25279 |
| ABC transporter, ATP-binding protein                                    |      | 2861900 | 2863117 | 41.90632703 | 64.9897288 | 1.55083 |
| glutamate transporter, putative                                         | 1422 | 2863129 | 2864361 | 73.05194805 | 73.2617695 | 1.00287 |
| Orotate phosphoribosyltransferase (EC 2.4.2.10)                         | 1421 | 2864418 | 2865020 | 86.37873754 | 95.8322259 | 1.10944 |
| Phosphoglycolate phosphatase (EC 3.1.3.18)                              | 1420 | 2865028 | 2865732 | 71.02272727 | 87.234375  | 1.22826 |
| conserved hypothetical protein; putative cell growth regulatory protein | 1419 | 2865796 | 2866065 | 78.0669145  | 69.1821561 | 0.88619 |
| Programmed cell death toxin MazF                                        | 1418 | 2866071 | 2866415 | 229.6511628 | 143.361919 | 0.62426 |
| Treponemal membrane protein B precursor (Antigen tmpB)                  |      | 2866507 | 2868945 | 12.71534044 | 13.3582855 | 1.05056 |
| Cell surface protein                                                    | 1416 | 2868950 | 2870872 | 5.202913632 | 5.32544225 | 1.02355 |
| hypothetical protein                                                    |      | 2870871 | 2870984 | 35.39823009 | 0          | 0       |
| hypothetical protein                                                    |      | 2871015 | 2871185 | 5.882352941 | 0          | 0       |
| hypothetical protein                                                    |      | 2871176 | 2871475 | 10.03344482 | 15.5602007 | 1.55083 |
| PilT protein, N-terminal                                                | 1412 | 2871593 | 2871991 | 40.16064257 | 37.3694779 | 0.9305  |
| hypothetical protein                                                    | 1411 | 2871988 | 2872233 | 61.45251397 | 25.9916201 | 0.42295 |
| hypothetical protein                                                    | 1410 | 2872249 | 2872416 | 0           | 6.12171053 | #DIV/0! |
| hypothetical protein                                                    | 1409 | 2872435 | 2872662 | 26.43171806 | 40.9911894 | 1.55083 |
| hypothetical protein                                                    | 1408 | 2872672 | 2872947 | 55.35055351 | 61.804428  | 1.1166  |
| hypothetical protein                                                    | 1407 | 2872987 | 2873133 | 0           | 6.37328767 | #DIV/0! |
| HigA protein (antitoxin to HigB)                                        | 1406 | 2873541 | 2873840 | 73.57859532 | 90.2491639 | 1.22657 |
| hypothetical protein                                                    | 1405 | 2873920 | 2874096 | 22.72727273 | 37.0085227 | 1.62838 |
| Outer membrane autotransporter barrel                                   | 1404 | 2874261 | 2876795 | 86.81925809 | 96.2079716 | 1.10814 |
| Large repetitive protein                                                |      | 2876811 | 2880701 | 48.32904884 | 35.4020566 | 0.73252 |
| hypothetical protein                                                    | 1402 | 2880879 | 2881025 | 27.39726027 | 0          | 0       |
| Hydrolase (HAD superfamily)                                             | 1401 | 2881173 | 2881952 | 50.06418485 | 50.1681643 | 1.00208 |
| hypothetical protein                                                    | 1400 | 2882009 | 2896942 | 0.602692024 | 0.37386995 | 0.62033 |
| hypothetical protein                                                    | 1399 | 2896946 | 2898487 | 0           | 0.60382868 | #DIV/0! |

|                                                                                                                |      |         |         |             |            |         |
|----------------------------------------------------------------------------------------------------------------|------|---------|---------|-------------|------------|---------|
| Leader peptidase (Prepilin peptidase) (EC 3.4.23.43)                                                           | 1398 | 2898642 | 2899076 | 0           | 0          | #DIV/0! |
| General secretion pathway protein D / Type II secretion outermembrane pore forming protein (PulD)              | 1397 | 2899201 | 2901258 | 0           | 0.90471561 | #DIV/0! |
| General secretion pathway protein E                                                                            | 1396 | 2901255 | 2902757 | 0           | 0          | #DIV/0! |
| Type 4 fimbrial assembly protein pilC                                                                          | 1395 | 2902757 | 2903812 | 0           | 0          | #DIV/0! |
| General secretion pathway protein G                                                                            | 1394 | 2903827 | 2904306 | 4.175365344 | 0          | 0       |
| hypothetical protein                                                                                           | 1393 | 2904278 | 2904505 | 0           | 0          | #DIV/0! |
| hypothetical protein                                                                                           | 1392 | 2904495 | 2905004 | 0           | 1.8280943  | #DIV/0! |
| hypothetical protein                                                                                           | 1391 | 2905016 | 2906020 | 0           | 0          | #DIV/0! |
| hypothetical protein                                                                                           | 1390 | 2905998 | 2907152 | 0           | 0          | #DIV/0! |
| hypothetical protein                                                                                           | 1389 | 2907172 | 2907660 | 0           | 0          | #DIV/0! |
| hypothetical protein                                                                                           | 1388 | 2907650 | 2908222 | 0           | 1.62674825 | #DIV/0! |
| hypothetical protein                                                                                           | 1387 | 2908225 | 2908890 | 0           | 0          | #DIV/0! |
| hypothetical protein                                                                                           | 1386 | 2909286 | 2909903 | 21.06969206 | 18.0972447 | 0.85892 |
| ortholog to <i>Borrelia burgdorferi</i> BB0139 RND multidrug efflux transporter; Acriflavin resistance protein | 1385 | 2910082 | 2910456 | 294.1176471 | 318.459893 | 1.08276 |
| Probable Co/Zn/Cd efflux system membrane fusion protein                                                        | 1384 | 2910453 | 2913731 | 286.1500915 | 402.232611 | 1.40567 |
| Outer membrane protein                                                                                         | 1383 | 2913743 | 2914702 | 144.9426486 | 262.946298 | 1.81414 |
| hypothetical protein                                                                                           | 1382 | 2914699 | 2916159 | 223.9726027 | 327.586986 | 1.46262 |
| hypothetical protein                                                                                           | 1381 | 2916161 | 2916307 | 212.3287671 | 286.797945 | 1.35073 |
| hypothetical protein                                                                                           | 1380 | 2916314 | 2917519 | 78.00829876 | 98.8414938 | 1.26706 |
| Multidrug resistance ABC transporter ATP-binding and permease protein                                          | 1379 | 2918380 | 2920212 | 21.28820961 | 15.7453603 | 0.73963 |
| Multidrug resistance ABC transporter ATP-binding and permease protein                                          | 1378 | 2920248 | 2921987 | 33.92754457 | 25.1486486 | 0.74125 |
| Dipeptide-binding ABC transporter, periplasmic substrate-binding component (TC 3.A.1.5.2)                      | 1377 | 2922163 | 2923764 | 641.4740787 | 893.884447 | 1.39348 |
| Dipeptide transport system permease protein dppB (TC 3.A.1.5.2)                                                | 1376 | 2923880 | 2924812 | 68.6695279  | 67.8905579 | 0.98866 |
| Dipeptide transport system permease protein dppC (TC 3.A.1.5.2)                                                | 1375 | 2924814 | 2925713 | 62.29143493 | 72.4527253 | 1.16313 |
| Oligopeptide transport ATP-binding protein oppD (TC 3.A.1.5.1)                                                 | 1374 | 2925718 | 2926713 | 78.3919598  | 82.2954774 | 1.04979 |
| Oligopeptide transport ATP-binding protein oppF (TC 3.A.1.5.1)                                                 | 1373 | 2926710 | 2927717 | 35.74975174 | 55.4419067 | 1.55083 |
| Muconate cycloisomerase (EC 5.5.1.1)                                                                           | 1372 | 2927767 | 2928831 | 86.46616541 | 120.68515  | 1.39575 |
| Transglutaminase-like enzymes, putative cysteine proteases                                                     | 1371 | 2928844 | 2930211 | 107.5347476 | 106.187271 | 0.98747 |
| Cob(I)alamin adenosyltransferase PduO (EC 2.5.1.17)                                                            | 1370 | 2930287 | 2930823 | 74.62686567 | 102.42444  | 1.37249 |
| Alanyl-tRNA synthetase family protein                                                                          | 1369 | 2930832 | 2932097 | 73.51778656 | 72.8217391 | 0.99053 |
| Ribosomal large subunit pseudouridine synthase D (EC 4.2.1.70)                                                 | 1368 | 2932156 | 2932869 | 28.05049088 | 37.8464236 | 1.34923 |
| hypothetical protein                                                                                           | 1367 | 2932876 | 2934120 | 40.99678457 | 39.6434887 | 0.96699 |
| Ornithine carbamoyltransferase (EC 2.1.3.3)                                                                    | 1366 | 2934269 | 2935216 | 108.7645195 | 124.787223 | 1.14732 |
| Putative cytoplasmic protein                                                                                   | 1365 | 2935246 | 2936379 | 7.060900265 | 9.85525154 | 1.39575 |
| COG family: dihydrodipicolinate reductase                                                                      | 1364 | 2936631 | 2937689 | 24.57466919 | 17.5897921 | 0.71577 |
| hypothetical protein                                                                                           | 1363 | 2937698 | 2937997 | 33.44481605 | 24.8963211 | 0.7444  |
| Threonine synthase (EC 4.2.3.1)                                                                                | 1362 | 2938048 | 2939403 | 23.61623616 | 23.3483395 | 0.98866 |

|                                                                                  |      |         |         |             |            |         |
|----------------------------------------------------------------------------------|------|---------|---------|-------------|------------|---------|
| D-ornithine aminomutase S component                                              | 1361 | 2939413 | 2939769 | 22.47191011 | 20.9101124 | 0.9305  |
| L-beta-lysine 5,6-aminomutase alpha subunit (EC 5.4.3.3)                         | 1360 | 2939782 | 2942001 | 27.94051374 | 39.8366381 | 1.42577 |
| Methylaspartate mutase (EC 5.4.99.1)                                             | 1359 | 2942015 | 2943409 | 53.08464849 | 44.0552367 | 0.82991 |
| Na <sup>+</sup> /H <sup>+</sup> antiporter NhaC                                  | 1358 | 2943591 | 2945042 | 78.56650586 | 111.583046 | 1.42024 |
| UDP-sugar hydrolase (EC 3.6.1.45); 5'-nucleotidase (EC 3.1.3.5)                  | 1357 | 2945208 | 2946779 | 115.21324   | 123.790261 | 1.07444 |
| Hydrolase (HAD superfamily)                                                      | 1356 | 2946789 | 2947562 | 69.85769728 | 52.9650712 | 0.75819 |
| putative periplasmic binding transport protein                                   | 1355 | 2947694 | 2948527 | 15.6062425  | 22.3409364 | 1.43154 |
| Amino acid ABC transporter, permease protein                                     | 1354 | 2948546 | 2949262 | 9.776536313 | 18.1941341 | 1.861   |
| ABC-type polar amino acid transport system, ATPase component                     | 1353 | 2949259 | 2950029 | 3.896103896 | 2.41688312 | 0.62033 |
| L-serine dehydratase, alpha subunit (EC 4.3.1.17)                                | 1352 | 2950075 | 2951688 | 15.51831161 | 23.1036623 | 1.4888  |
| LacI-family regulatory protein                                                   | 1351 | 2951817 | 2952869 | 48.47908745 | 88.4505703 | 1.82451 |
| NAD synthetase (EC 6.3.1.5) / Glutamine amidotransferase chain of NAD synthetase | 1350 | 2952925 | 2954661 | 333.5253456 | 364.481567 | 1.09282 |
| hypothetical protein                                                             |      | 2954819 | 2955007 | 10.63829787 | 0          | 0       |
| hypothetical protein                                                             | 1348 | 2954958 | 2956145 | 69.08171862 | 58.0092671 | 0.83972 |
| mucin 2                                                                          | 1347 | 2956149 | 2957771 | 53.63748459 | 76.8723798 | 1.43318 |
| putative autotransporter protein                                                 | 1346 | 2957781 | 2960996 | 73.09486781 | 61.0685848 | 0.83547 |
| NAD synthetase (EC 6.3.1.5) / Glutamine amidotransferase chain of NAD synthetase | 1345 | 2961047 | 2961274 | 22.02643172 | 28.6938326 | 1.3027  |
| hypothetical protein                                                             |      | 2961376 | 2961531 | 6.451612903 | 6.00322581 | 0.9305  |
| Predicted cell-wall-anchored protein SasA (LPXTG motif)                          | 1343 | 2961721 | 2963562 | 88.53883759 | 78.3419337 | 0.88483 |
| Large repetitive protein                                                         | 1342 | 2963577 | 2965778 | 56.33802817 | 42.2762381 | 0.7504  |
| hypothetical protein                                                             |      | 2965790 | 2965930 | 21.42857143 | 19.9392857 | 0.9305  |
| Metal-dependent hydrolases of the beta-lactamase superfamily I; PhnP protein     | 1340 | 2965895 | 2966719 | 71.60194175 | 93.7275485 | 1.30901 |
| Hexokinase                                                                       | 1339 | 2966776 | 2968131 | 168.2656827 | 190.220295 | 1.13048 |
| carboxylesterase type B                                                          | 1338 | 2968291 | 2969916 | 263.3846154 | 1929.71385 | 7.3266  |
| para-nitrobenzyl esterase (intracellular esterase B)                             | 1337 | 2970016 | 2971620 | 337.2817955 | 1963.67986 | 5.82207 |
| Dipeptide transport ATP-binding protein dppF (TC 3.A.1.5.2)                      |      | 2971693 | 2972463 | 6.510416667 | 19.3854167 | 2.9776  |
| ABC transporter, ATP-binding protein                                             |      | 2972466 | 2973332 | 4.618937644 | 1.07448037 | 0.23263 |
| Binding-protein-dependent transport systems inner membrane component             | 1334 | 2973329 | 2974159 | 3.614457831 | 0          | 0       |
| ABC transporter, permease protein                                                | 1333 | 2974169 | 2975131 | 3.118503119 | 1.93451143 | 0.62033 |
| ABC transporter, periplasmic substrate-binding protein                           | 1332 | 2975192 | 2976712 | 9.210526316 | 8.57039474 | 0.9305  |
| Integral membrane protein                                                        | 1331 | 2976873 | 2978054 | 7.620660457 | 7.87891617 | 1.03389 |
| Alkaline phosphatase (EC 3.1.3.1)                                                | 1330 | 2978061 | 2979677 | 77.35148515 | 48.9433787 | 0.63274 |
| Beta-glucosidase (EC 3.2.1.21)                                                   | 1329 | 2979773 | 2981995 | 12.60126013 | 5.02520252 | 0.39879 |
| Beta-xylosidase (EC 3.2.1.37)                                                    | 1328 | 2982094 | 2984595 | 9.996001599 | 8.92922831 | 0.89328 |
| hypothetical protein                                                             | 1327 | 2984646 | 2984771 | 0           | 0          | #DIV/0! |
| Catechol 2,3-dioxygenase (EC 1.13.11.2)                                          | 1326 | 2984784 | 2985710 | 219.2224622 | 169.821274 | 0.77465 |
| 2-polypropenylphenol hydroxylase and related flavodoxin oxidoreductases          | 1325 | 2985738 | 2986022 | 52.81690141 | 13.1056338 | 0.24813 |
| 4-hydroxy-2-oxovalerate aldolase (EC 4.1.3.-)                                    | 1324 | 2986040 | 2987047 | 60.57596822 | 36.0372393 | 0.59491 |
| Acetaldehyde dehydrogenase (acetylating)                                         | 1323 | 2987049 | 2987915 | 58.89145497 | 62.3198614 | 1.05822 |



|                                                                                                         |      |         |         |             |            |         |
|---------------------------------------------------------------------------------------------------------|------|---------|---------|-------------|------------|---------|
| 4-oxalocrotonate decarboxylase (EC 4.1.1.77)                                                            | 1322 | 2987986 | 2988768 | 60.10230179 | 42.8363171 | 0.71272 |
| 2-hydroxymuconic semialdehyde hydrolase (EC 3.7.1.9)                                                    | 1321 | 2988772 | 2989596 | 42.47572816 | 59.8501214 | 1.40904 |
| hypothetical protein                                                                                    |      | 2989612 | 2989734 | 24.59016393 | 30.5081967 | 1.24067 |
| hypothetical protein                                                                                    |      | 2989738 | 2989935 | 0           | 4.72335025 | #DIV/0! |
| hypothetical protein                                                                                    | 1318 | 2990002 | 2990499 | 420.5231388 | 372.574447 | 0.88598 |
| Lactate-responsive regulator LldR in Firmicutes, GntR family                                            | 1317 | 2990588 | 2991319 | 30.09575923 | 26.7311902 | 0.8882  |
| hypothetical protein                                                                                    | 1316 | 2991478 | 2992296 | 11.00244499 | 13.6503667 | 1.24067 |
| TRAP-type C4-dicarboxylate transport system, periplasmic component                                      | 1315 | 2992327 | 2993397 | 16.82242991 | 26.9584112 | 1.60253 |
| Predicted rhamnogalacturonide-specific TRAP-type transporter, small transmembrane component RhiB        | 1314 | 2993426 | 2994028 | 11.62790698 | 1.54568106 | 0.13293 |
| TRAP-type C4-dicarboxylate transport system, large permease component                                   | 1313 | 2994041 | 2995342 | 6.149116065 | 3.57609531 | 0.58156 |
| hypothetical protein                                                                                    | 1312 | 2995369 | 2996586 | 4.930156122 | 6.88126541 | 1.39575 |
| Transketolase, N-terminal section (EC 2.2.1.1)                                                          | 1311 | 2996637 | 2997473 | 10.76555024 | 5.56519139 | 0.51694 |
| Transketolase, C-terminal section (EC 2.2.1.1)                                                          | 1310 | 2997476 | 2998411 | 11.76470588 | 6.96631016 | 0.59214 |
| 2-hydroxy-3-oxopropionate reductase (EC 1.1.1.60)                                                       | 1309 | 2998425 | 2999306 | 12.48581158 | 19.0113507 | 1.52264 |
| 2-(5"-triphosphoribosyl)-3'-dephosphocoenzyme-A synthase (EC 2.7.8.25)                                  | 1308 | 2999469 | 3000914 | 22.83737024 | 23.1820069 | 1.01509 |
| Fumarate hydratase class I, aerobic (EC 4.2.1.2); L(+)-tartrate dehydratase beta subunit (EC 4.2.1.32)  | 1307 | 3000952 | 3001524 | 48.95104895 | 39.041958  | 0.79757 |
| Fumarate hydratase class I, aerobic (EC 4.2.1.2); L(+)-tartrate dehydratase alpha subunit (EC 4.2.1.32) | 1306 | 3001524 | 3002363 | 39.33253874 | 42.1442193 | 1.07148 |
| hypothetical protein                                                                                    | 1305 | 3002418 | 3003353 | 72.72727273 | 54.7352941 | 0.75261 |
| Methylaspartate ammonia-lyase (EC 4.3.1.2)                                                              | 1304 | 3003412 | 3004662 | 141.6       | 105.7048   | 0.7465  |
| Putative glutamate mutase subunit E                                                                     | 1303 | 3004672 | 3006120 | 109.8066298 | 102.175069 | 0.9305  |
| METHYLASPARTATE MUTASE (EC 5.4.99.1)                                                                    | 1302 | 3006104 | 3007498 | 44.47632712 | 53.4002869 | 1.20065 |
| Methylaspartate mutase S chain (EC 5.4.99.1)                                                            | 1301 | 3007504 | 3007920 | 67.30769231 | 53.6826923 | 0.79757 |
| hypothetical protein                                                                                    |      | 3007994 | 3008113 | 0           | 0          | #DIV/0! |
| Catalyzes the cleavage of p-aminobenzoyl-glutamate to p-aminobenzoate and glutamate, subunit B          | 1299 | 3008198 | 3009643 | 93.42560554 | 65.6823529 | 0.70304 |
| Regulatory protein GntR, HTH                                                                            | 1298 | 3009647 | 3010636 | 77.85642063 | 109.138524 | 1.40179 |
| Flagellar hook-length control protein fliK                                                              | 1297 | 3011133 | 3012992 | 57.55782679 | 61.0656267 | 1.06094 |
| Flagellar hook-length control protein fliK                                                              | 1296 | 3013004 | 3015493 | 43.39092005 | 38.5060265 | 0.88742 |
| hypothetical protein                                                                                    | 1295 | 3015505 | 3017775 | 88.10572687 | 62.7165198 | 0.71183 |
| hypothetical protein                                                                                    |      | 3017845 | 3017988 | 0           | 0          | #DIV/0! |
| hypothetical protein                                                                                    | 1293 | 3018215 | 3018919 | 2.840909091 | 2.64346591 | 0.9305  |
| hypothetical protein                                                                                    | 1292 | 3018879 | 3019232 | 175.6373938 | 144.978754 | 0.82544 |
| Superfamily II DNA/RNA helicases, SNF2 family                                                           | 1291 | 3019425 | 3022697 | 8.251833741 | 4.83450489 | 0.58587 |
| hypothetical protein                                                                                    | 1290 | 3022690 | 3024843 | 5.109150023 | 1.29656294 | 0.25377 |
| [Citrate [pro-3S]-lyase] ligase (EC 6.2.1.22)                                                           | 1289 | 3024882 | 3025970 | 42.27941176 | 46.1829044 | 1.09233 |
| Citrate lyase alpha chain (EC 4.1.3.6)                                                                  | 1288 | 3025967 | 3027376 | 34.77643719 | 40.2842441 | 1.15838 |
| Citrate lyase beta chain (EC 4.1.3.6)                                                                   | 1287 | 3027369 | 3028244 | 22.85714286 | 24.4588571 | 1.07008 |



|                                                                                                |      |         |         |             |            |         |
|------------------------------------------------------------------------------------------------|------|---------|---------|-------------|------------|---------|
| Citrate lyase acyl carrier protein                                                             | 1286 | 3028245 | 3028511 | 67.66917293 | 48.9736842 | 0.72372 |
| hypothetical protein                                                                           | 1285 | 3028610 | 3028804 | 30.92783505 | 14.3891753 | 0.46525 |
| Catalyzes the cleavage of p-aminobenzoyl-glutamate to p-aminobenzoate and glutamate, subunit B | 1284 | 3029211 | 3030647 | 217.270195  | 209.297702 | 0.96331 |
| hypothetical protein                                                                           | 1283 | 3030649 | 3031413 | 129.5811518 | 86.4731675 | 0.66733 |
| hypothetical protein                                                                           | 1282 | 3031424 | 3032149 | 78.62068966 | 69.3062069 | 0.88153 |
| Anthranilate synthase, amidotransferase component (EC 4.1.3.27)                                | 1281 | 3032197 | 3032973 | 73.45360825 | 63.5521907 | 0.8652  |
| 3-oxoacyl-[acyl-carrier-protein] synthase, KASIII (EC 2.3.1.41)                                | 1280 | 3033334 | 3034398 | 241.5413534 | 258.860902 | 1.0717  |
| Malonyl CoA-acyl carrier protein transacylase (EC 2.3.1.39)                                    | 1279 | 3034392 | 3035366 | 130.3901437 | 192.023101 | 1.47268 |
| 3-oxoacyl-[acyl-carrier protein] reductase (EC 1.1.1.100)                                      | 1278 | 3035390 | 3036124 | 433.1034483 | 428.671724 | 0.98977 |
| 3-oxoacyl-[acyl-carrier-protein] synthase, KASII (EC 2.3.1.41)                                 | 1277 | 3036138 | 3037403 | 531.2252964 | 609.054545 | 1.14651 |
| (3R)-hydroxymyristoyl-[acyl carrier protein] dehydratase (EC 4.2.1.-)                          | 1276 | 3037422 | 3037841 | 687.3508353 | 370.867542 | 0.53956 |
| hypothetical protein                                                                           |      | 3037976 | 3038356 | 39.47368421 | 31.8328947 | 0.80643 |
| DNA modification methylase (Adenine-specific methyltransferase) (EC 2.1.1.72)                  | 1274 | 3038438 | 3039790 | 32.5443787  | 28.9060651 | 0.8882  |
| Short-chain alcohol dehydrogenase family                                                       |      | 3039791 | 3040318 | 89.18406072 | 82.9857685 | 0.9305  |
| Short-chain alcohol dehydrogenase family                                                       |      | 3040348 | 3041268 | 214.1304348 | 205.316848 | 0.95884 |
| Biotin carboxyl carrier protein of acetyl-CoA carboxylase                                      | 1271 | 3041308 | 3041901 | 227.6559865 | 233.801855 | 1.027   |
| Biotin carboxylase of acetyl-CoA carboxylase (EC 6.3.4.14)                                     | 1270 | 3041922 | 3043253 | 87.90383171 | 92.2809917 | 1.04979 |
| Acetyl-coenzyme A carboxyl transferase beta chain (EC 6.4.1.2)                                 | 1269 | 3043243 | 3044067 | 92.23300971 | 99.3737864 | 1.07742 |
| Acetyl-coenzyme A carboxyl transferase alpha chain (EC 6.4.1.2)                                | 1268 | 3044064 | 3044993 | 200.2152853 | 226.364909 | 1.13061 |
| Acyl-CoA dehydrogenase (EC 1.3.99.3)                                                           | 1267 | 3045001 | 3046737 | 391.1290323 | 553.154378 | 1.41425 |
| Electron transfer flavoprotein, alpha subunit                                                  | 1266 | 3046750 | 3047757 | 327.7060576 | 373.308838 | 1.13916 |
| Electron transfer flavoprotein, beta subunit                                                   | 1265 | 3047845 | 3048675 | 263.8554217 | 442.828313 | 1.6783  |
| hypothetical protein                                                                           |      | 3048769 | 3048906 | 0           | 0          | #DIV/0! |
| transcriptional regulator, putative                                                            | 1263 | 3048839 | 3049186 | 20.17291066 | 32.1786744 | 1.59514 |
| HIPA PROTEIN                                                                                   | 1262 | 3049186 | 3050436 | 13.6        | 18.61      | 1.36838 |
| Adenylate cyclase (EC 4.6.1.1)                                                                 | 1261 | 3050506 | 3051837 | 54.84598047 | 30.0612322 | 0.5481  |
| Sensory box histidine kinase/response regulator                                                | 1260 | 3051827 | 3054091 | 35.33568905 | 33.7018551 | 0.95376 |
| Transcription regulator [contains diacylglycerol kinase catalytic domain]                      | 1259 | 3054084 | 3055103 | 13.73895976 | 28.3076546 | 2.06039 |
| FOG: CheY-like receiver                                                                        | 1258 | 3055100 | 3057892 | 31.51862464 | 30.9944484 | 0.98337 |
| Adenylate cyclase (EC 4.6.1.1)                                                                 | 1257 | 3057971 | 3059302 | 10.51840721 | 8.38918107 | 0.79757 |
| Sensory box histidine kinase/response regulator                                                | 1256 | 3059292 | 3063527 | 3.541912633 | 9.44781582 | 2.66743 |
| FOG: CheY-like receiver                                                                        | 1255 | 3063553 | 3066357 | 7.132667618 | 3.98216833 | 0.5583  |
| Sensory box histidine kinase/response regulator                                                | 1254 | 3066354 | 3069575 | 9.313877678 | 3.75551071 | 0.40322 |
| Bmp family protein                                                                             | 1253 | 3069572 | 3070711 | 14.04741001 | 8.98639157 | 0.63972 |
| Bmp family protein                                                                             | 1252 | 3070723 | 3071868 | 6.986899563 | 7.3139738  | 1.04681 |

|                                                                                                                                                                        |      |         |         |             |            |         |
|------------------------------------------------------------------------------------------------------------------------------------------------------------------------|------|---------|---------|-------------|------------|---------|
| Sensory box histidine kinase/response regulator<br>FOG: CheY-like receiver                                                                                             | 1251 | 3071865 | 3074768 | 10.67860834 | 5.12848777 | 0.48026 |
|                                                                                                                                                                        | 1250 | 3074765 | 3078013 | 10.1663586  | 4.87322859 | 0.47935 |
| Sensory box histidine kinase/response regulator<br>hypothetical protein                                                                                                | 1249 | 3078087 | 3080771 | 6.706408346 | 5.54694486 | 0.82711 |
|                                                                                                                                                                        | 1248 | 3080832 | 3080972 | 7.142857143 | 6.64642857 | 0.9305  |
| Multi antimicrobial extrusion protein (Na <sup>+</sup> )/drug<br>antiporter), MATE family of MDR efflux pumps                                                          | 1247 | 3081335 | 3082711 | 5.813953488 | 4.73364826 | 0.81419 |
| Nitroreductase                                                                                                                                                         | 1246 | 3082737 | 3083489 | 25.26595745 | 42.0704787 | 1.66511 |
| aminoglycoside 6-adenylyltransferase                                                                                                                                   | 1245 | 3083514 | 3083774 | 0           | 0          | #DIV/0! |
| hypothetical protein                                                                                                                                                   | 1244 | 3083782 | 3084093 | 0           | 0          | #DIV/0! |
| hypothetical protein                                                                                                                                                   | 1243 | 3084153 | 3084473 | 3.125       | 0          | 0       |
| hypothetical protein                                                                                                                                                   | 1242 | 3084517 | 3085089 | 0           | 0          | #DIV/0! |
| hypothetical protein                                                                                                                                                   |      | 3085342 | 3085548 | 4.854368932 | 0          | 0       |
| hypothetical protein                                                                                                                                                   | 1240 | 3085851 | 3086096 | 57.14285714 | 72.1612245 | 1.26282 |
| Plasmid stabilization system protein                                                                                                                                   | 1239 | 3086177 | 3086485 | 32.46753247 | 30.211039  | 0.9305  |
| Prevent-host-death family protein                                                                                                                                      | 1238 | 3086482 | 3086766 | 45.77464789 | 45.8697183 | 1.00208 |
| ATP synthase epsilon chain (EC 3.6.3.14)                                                                                                                               | 1237 | 3087118 | 3087543 | 127.0588235 | 186.1      | 1.46468 |
| ATP synthase beta chain (EC 3.6.3.14)                                                                                                                                  | 1236 | 3087552 | 3088934 | 440.6657019 | 588.463821 | 1.3354  |
| ATP synthase gamma chain (EC 3.6.3.14)                                                                                                                                 | 1235 | 3088993 | 3089880 | 169.1093574 | 184.631342 | 1.09179 |
| ATP synthase alpha chain (EC 3.6.3.14)                                                                                                                                 | 1234 | 3089889 | 3091391 | 264         | 307.685333 | 1.16547 |
| ATP synthase delta chain (EC 3.6.3.14)                                                                                                                                 | 1233 | 3091385 | 3091951 | 217.3144876 | 207.14311  | 0.9532  |
| ATP synthase B chain (EC 3.6.3.14)                                                                                                                                     | 1232 | 3091951 | 3092454 | 590.4572565 | 369.980119 | 0.6266  |
| ATP synthase C chain (EC 3.6.3.14)                                                                                                                                     | 1231 | 3092466 | 3092696 | 343.4782609 | 206.328261 | 0.6007  |
| ATP synthase A chain (EC 3.6.3.14)                                                                                                                                     | 1230 | 3092852 | 3093574 | 178.6703601 | 163.675208 | 0.91607 |
| hypothetical protein                                                                                                                                                   | 1229 | 3093636 | 3094151 | 489.3203883 | 543.845631 | 1.11143 |
| Methionine gamma-lyase (EC 4.4.1.11)                                                                                                                                   | 1228 | 3094223 | 3095431 | 1.655629139 | 4.62168874 | 2.7915  |
| Predicted nicotinate-regulated transporter<br>BH3254                                                                                                                   | 1227 | 3095568 | 3096635 | 99.34395501 | 119.473758 | 1.20263 |
| Molybdopterin-guanine dinucleotide biosynthesis<br>protein B                                                                                                           | 1226 | 3096638 | 3097135 | 108.6519115 | 131.056338 | 1.2062  |
| FIG060329: hypothetical protein                                                                                                                                        | 1225 | 3097125 | 3097553 | 189.2523364 | 130.443925 | 0.68926 |
| Molybdenum cofactor biosynthesis protein A                                                                                                                             | 1224 | 3097556 | 3098560 | 176.2948207 | 139.945717 | 0.79382 |
| Molybdenum cofactor biosynthesis protein C                                                                                                                             | 1223 | 3098566 | 3099096 | 105.6603774 | 91.2943396 | 0.86404 |
| Integration host factor beta subunit                                                                                                                                   | 1222 | 3099398 | 3099901 | 3952.286282 | 5333.26342 | 1.34941 |
| N-acetylneuraminase synthase (EC 2.5.1.56)                                                                                                                             | 1221 | 3100112 | 3101221 | 21.64111812 | 18.458972  | 0.85296 |
| Outer membrane stress sensor protease DegQ                                                                                                                             | 1220 | 3101502 | 3103013 | 232.9583058 | 180.43448  | 0.77454 |
| Methionine aminopeptidase (EC 3.4.11.18)                                                                                                                               | 1219 | 3103102 | 3103896 | 192.6952141 | 165.239924 | 0.85752 |
| Chaperone protein DnaJ                                                                                                                                                 | 1218 | 3103905 | 3104681 | 180.4123711 | 141.493557 | 0.78428 |
| hypothetical protein                                                                                                                                                   | 1217 | 3104674 | 3105075 | 182.0448878 | 153.149626 | 0.84127 |
| Universal stress protein                                                                                                                                               | 1216 | 3105100 | 3105585 | 284.5360825 | 237.901031 | 0.8361  |
| V-type ATP synthase subunit D (EC 3.6.3.14)                                                                                                                            | 1215 | 3105582 | 3106232 | 329.2307692 | 271.992308 | 0.82614 |
| hypothetical protein                                                                                                                                                   | 1214 | 3106329 | 3107207 | 69.476082   | 72.0660592 | 1.03728 |
| hypothetical protein                                                                                                                                                   | 1213 | 3107280 | 3107846 | 1.766784452 | 4.9319788  | 2.7915  |
| hypothetical protein                                                                                                                                                   | 1212 | 3107983 | 3108819 | 51.4354067  | 35.6172249 | 0.69247 |
| Probable N-glycosylase/DNA lyase [Includes: 8-<br>oxoguanine DNA glycosylase (EC 3.2.2.-); DNA-<br>(apurinic or apyrimidinic site) lyase (EC 4.2.99.18)<br>(AP lyase)] | 1211 | 3108816 | 3109466 | 27.69230769 | 22.9046154 | 0.82711 |
| hypothetical protein                                                                                                                                                   | 1210 | 3109463 | 3109606 | 6.993006993 | 6.50699301 | 0.9305  |

|                                                                                                          |         |         |             |             |            |         |
|----------------------------------------------------------------------------------------------------------|---------|---------|-------------|-------------|------------|---------|
| 4-diphosphocytidyl-2-C-methyl-D-erythritol kinase (EC 2.7.1.148)                                         | 1209    | 3109628 | 3110683     | 342.1800948 | 214.323697 | 0.62635 |
| SpoVG family protein                                                                                     | 1208    | 3110726 | 3111007     | 604.9822064 | 453.660142 | 0.74987 |
| LSU ribosomal protein L25p                                                                               | 1206    | 3111277 | 3111921     | 773.2919255 | 878.484472 | 1.13603 |
| ABC transporter, permease protein, putative                                                              | 1205    | 3111990 | 3113249     | 30.97696585 | 14.042494  | 0.45332 |
| hypothetical protein                                                                                     | 1204    | 3113399 | 3113632     | 25.75107296 | 43.9291845 | 1.70592 |
| Transcriptional regulator, MarR family                                                                   | 1203    | 3113816 | 3114274     | 17.46724891 | 28.4432314 | 1.62838 |
| tRNA(Ile)-lysidine synthetase                                                                            | 1202    | 3114392 | 3115819     | 97.40714786 | 125.196917 | 1.28529 |
| Cell division protein ftsH (EC 3.4.24.-)                                                                 | 1201    | 3115809 | 3117722     | 261.8923157 | 292.818087 | 1.11809 |
| hypothetical protein                                                                                     | 1200    | 3117722 | 3119455     | 117.1379111 | 149.80352  | 1.27886 |
| Serine protease precursor MucD/AlgY associated with sigma factor RpoE                                    | 1199    | 3119461 | 3121299     | 145.2665941 | 164.53346  | 1.13263 |
| Possible 5-nitroimidazole antibiotic resistance transcriptional regulator, PemK family                   | 1198    | 3121306 | 3121785     | 127.348643  | 110.727557 | 0.86948 |
| 1197                                                                                                     | 3121941 | 3122258 | 6.309148265 | 8.80599369  | 1.39575    |         |
| Proteic killer gene system protein , suppressor of inhibitory function of MazF                           | 1196    | 3122258 | 3122590     | 12.04819277 | 8.40813253 | 0.69788 |
| hypothetical protein                                                                                     | 1195    | 3122655 | 3123356     | 369.4721826 | 292.025678 | 0.79039 |
| Transcriptional regulator                                                                                | 1194    | 3123428 | 3124552     | 149.4661922 | 153.979537 | 1.0302  |
| 2-methylthioadenine synthetase                                                                           | 1193    | 3124555 | 3126021     | 68.89495225 | 88.2261255 | 1.28059 |
| ATP-dependent DNA helicase UvrD/PcrA                                                                     | 1192    | 3126092 | 3128560     | 38.89789303 | 51.6525527 | 1.3279  |
| Uncharacterized protein TP_0678                                                                          | 1191    | 3128553 | 3129398     | 30.76923077 | 41.8449704 | 1.35996 |
| hypothetical protein                                                                                     | 1190    | 3129480 | 3129617     | 0           | 6.7919708  | #DIV/0! |
| Putative biofilm-associated surface protein                                                              | 1189    | 3129627 | 3132245     | 45.45454545 | 41.2291826 | 0.90704 |
| hypothetical protein                                                                                     |         | 3132304 | 3132420     | 8.620689655 | 8.02155172 | 0.9305  |
| hypothetical protein                                                                                     | 1187    | 3132410 | 3132550     | 0           | 0          | #DIV/0! |
| Diaminopimelate decarboxylase (EC 4.1.1.20)                                                              | 1186    | 3132554 | 3133825     | 177.0259638 | 188.149882 | 1.06284 |
| LL-diaminopimelate aminotransferase                                                                      | 1185    | 3133839 | 3135044     | 180.0829876 | 151.351037 | 0.84045 |
| hypothetical protein                                                                                     | 1184    | 3135137 | 3135403     | 124.0601504 | 115.43797  | 0.9305  |
| Plasmid stability protein                                                                                | 1183    | 3135400 | 3135813     | 53.26876513 | 65.3377724 | 1.22657 |
| ATP-dependent DNA helicase RecQ                                                                          | 1182    | 3135904 | 3137610     | 2.344665885 | 4.36342321 | 1.861   |
| hypothetical protein                                                                                     | 1181    | 3137664 | 3137894     | 100         | 141.597826 | 1.41598 |
| Serine/threonine protein kinase PrkC, regulation of stationary phase                                     | 1180    | 3137923 | 3139008     | 132.718894  | 137.21659  | 1.03389 |
| Methionyl-tRNA formyltransferase (EC 2.1.2.9)                                                            | 1179    | 3139018 | 3140067     | 96.2821735  | 108.218303 | 1.12397 |
| Peptide deformylase (EC 3.5.1.88)                                                                        | 1178    | 3140069 | 3140557     | 258.1967213 | 255.506148 | 0.98958 |
| Mannose-6-phosphate isomerase (EC 5.3.1.8) / Mannose-1-phosphate guanylyltransferase (GDP) (EC 2.7.7.22) | 1177    | 3140872 | 3142041     | 175.3635586 | 163.971771 | 0.93504 |
| Acetate kinase (EC 2.7.2.1)                                                                              | 1176    | 3142145 | 3143482     | 913.7284321 | 1084.76894 | 1.18719 |
| heat shock protein                                                                                       | 1175    | 3143677 | 3144228     | 154.2649728 | 190.828494 | 1.23702 |
| hypothetical protein                                                                                     | 1174    | 3144327 | 3145097     | 97.4025974  | 84.5909091 | 0.86847 |
| Long-chain-fatty-acid--CoA ligase (EC 6.2.1.3)                                                           | 1173    | 3145184 | 3146890     | 83.82180539 | 58.3607855 | 0.69625 |
| COG1355, Predicted dioxygenase                                                                           | 1172    | 3146937 | 3147794     | 93.34889148 | 81.4323221 | 0.87234 |
| Fibronectin/fibrinogen-binding protein                                                                   | 1171    | 3147887 | 3149371     | 30.32345013 | 36.9942722 | 1.21999 |
| Beta-hexosaminidase (EC 3.2.1.52)                                                                        | 1170    | 3149405 | 3150583     | 53.48047538 | 52.1332767 | 0.97481 |
| Ribosomal large subunit pseudouridine synthase D (EC 4.2.1.70)                                           | 1169    | 3150585 | 3151271     | 48.10495627 | 70.5335277 | 1.46624 |
| hypothetical protein                                                                                     | 1168    | 3151299 | 3152936     | 156.3836286 | 151.767563 | 0.97048 |
| hypothetical protein                                                                                     | 1167    | 3153043 | 3153927     | 46.3800905  | 59.9983032 | 1.29362 |
| hypothetical protein                                                                                     | 1166    | 3154027 | 3154710     | 43.9238653  | 49.045388  | 1.1166  |
| Flagellar biosynthesis protein fliS                                                                      | 1165    | 3154821 | 3155282     | 579.175705  | 764.988069 | 1.32082 |
| hypothetical protein                                                                                     | 1164    | 3155514 | 3155762     | 28.22580645 | 41.2721774 | 1.46221 |

|                                                                                                                                                                                   |      |         |         |             |            |         |
|-----------------------------------------------------------------------------------------------------------------------------------------------------------------------------------|------|---------|---------|-------------|------------|---------|
| Gsl0633 protein                                                                                                                                                                   | 1163 | 3155818 | 3156054 | 25.42372881 | 23.6567797 | 0.9305  |
| hypothetical protein                                                                                                                                                              | 1162 | 3156051 | 3156464 | 36.31961259 | 31.5423729 | 0.86847 |
| hypothetical protein                                                                                                                                                              | 1161 | 3156555 | 3156701 | 13.69863014 | 12.7465753 | 0.9305  |
| hypothetical protein                                                                                                                                                              |      | 3156744 | 3156857 | 115.0442478 | 57.6415929 | 0.50104 |
| hypothetical protein                                                                                                                                                              | 1159 | 3156841 | 3157095 | 185.0393701 | 186.832677 | 1.00969 |
| hypothetical protein                                                                                                                                                              | 1158 | 3157113 | 3157250 | 167.8832117 | 142.631387 | 0.84959 |
| hypothetical protein                                                                                                                                                              | 1157 | 3157271 | 3157897 | 281.1501597 | 175.397764 | 0.62386 |
| hypothetical protein                                                                                                                                                              | 1156 | 3157925 | 3158053 | 70.3125     | 50.8867188 | 0.72372 |
| hypothetical protein                                                                                                                                                              | 1155 | 3158109 | 3158525 | 240.3846154 | 266.176683 | 1.1073  |
| hypothetical protein                                                                                                                                                              | 1154 | 3158712 | 3159626 | 129.1028446 | 77.3719912 | 0.59931 |
| V-type ATP synthase subunit B (EC 3.6.3.14)                                                                                                                                       | 1153 | 3159743 | 3161200 | 143.7456807 | 167.194195 | 1.16313 |
| V-type ATP synthase subunit A (EC 3.6.3.14)                                                                                                                                       | 1152 | 3161231 | 3163045 | 205.6384743 | 260.786899 | 1.26818 |
| V-type ATPase, subunit E, putative [EC:3.6.3.14]                                                                                                                                  | 1151 | 3163042 | 3163743 | 169.7574893 | 199.108417 | 1.1729  |
| V-type ATPase, subunit F, putative                                                                                                                                                | 1150 | 3163762 | 3164106 | 244.1860465 | 243.444767 | 0.99696 |
| V-type ATP synthase subunit K (EC 3.6.3.14)                                                                                                                                       | 1149 | 3164106 | 3164417 | 160.7717042 | 209.437299 | 1.3027  |
| V-type ATP synthase subunit I (EC 3.6.3.14)                                                                                                                                       | 1148 | 3164420 | 3166483 | 162.8696074 | 203.871062 | 1.25174 |
| Uncharacterized protein TP_0534                                                                                                                                                   | 1147 | 3166518 | 3167597 | 224.2817424 | 209.556534 | 0.93435 |
| hypothetical protein                                                                                                                                                              | 1146 | 3167597 | 3168010 | 305.0847458 | 261.35109  | 0.85665 |
| PTS system, fructose-specific IIA component (EC 2.7.1.69) / PTS system, fructose-specific IIB component (EC 2.7.1.69) / PTS system, fructose-specific IIC component (EC 2.7.1.69) | 1145 | 3168035 | 3168508 | 308.6680761 | 245.903805 | 0.79666 |
| Preprotein translocase subunit SecG (TC 3.A.5.1.1)                                                                                                                                | 1144 | 3168524 | 3168910 | 391.1917098 | 332.665803 | 0.85039 |
| Predicted molybdate-responsive regulator YvgK in bacilli                                                                                                                          | 1143 | 3169236 | 3170240 | 145.4183267 | 153.84761  | 1.05797 |
| Spermidine/putrescine-binding protein                                                                                                                                             | 1142 | 3170262 | 3171314 | 64.63878327 | 107.02519  | 1.65574 |
| ABC transporter, ATP-binding protein                                                                                                                                              | 1141 | 3171311 | 3172183 | 32.11009174 | 58.6897936 | 1.82777 |
| Ni <sup>2+</sup> -binding GTPase involved in regulation of expression and maturation of hydrogenase                                                                               | 1140 | 3172176 | 3172889 | 36.46563815 | 30.016129  | 0.82313 |
| methlytransferase, UbiE/COQ5 family                                                                                                                                               | 1139 | 3172886 | 3173587 | 44.22253923 | 69.0242511 | 1.56084 |
| Flagellar hook-length control protein fliK                                                                                                                                        | 1138 | 3173864 | 3175609 | 1.719197708 | 1.59971347 | 0.9305  |
| BNR repeat domain protein                                                                                                                                                         | 1136 | 3175635 | 3177710 | 0.481927711 | 1.79373494 | 3.722   |
| hypothetical protein                                                                                                                                                              | 1137 | 3177664 | 3177795 | 0           | 0          | #DIV/0! |
| Ig domain protein, group 2 domain protein                                                                                                                                         | 1135 | 3177839 | 3180271 | 0.822368421 | 0          | 0       |
| 5'-nucleotidase (EC 3.1.3.5)                                                                                                                                                      | 1134 | 3180348 | 3182177 | 0           | 0          | #DIV/0! |
| TonB-dependent receptor                                                                                                                                                           | 1133 | 3182226 | 3184259 | 0           | 0.45769798 | #DIV/0! |
| Molybdenum transport ATP-binding protein modC (TC 3.A.1.8.1)                                                                                                                      | 1132 | 3184276 | 3185040 | 0           | 2.43586387 | #DIV/0! |
| Ferric siderophore transport system, periplasmic binding protein TonB                                                                                                             | 1131 | 3185309 | 3186022 | 5.610098177 | 2.61009818 | 0.46525 |
| ABC transporter, solute-binding protein                                                                                                                                           | 1130 | 3186142 | 3187281 | 4.389815628 | 12.2541703 | 2.7915  |
| Vitamin B12 ABC transporter, permease component BtuC                                                                                                                              | 1129 | 3187289 | 3188323 | 2.901353965 | 3.59961315 | 1.24067 |
| ABC transporter related                                                                                                                                                           | 1128 | 3188317 | 3189162 | 10.65088757 | 24.2260355 | 2.27456 |
| Acetoin utilization protein AcuB                                                                                                                                                  | 1127 | 3189210 | 3189854 | 66.77018634 | 153.156832 | 2.29379 |
| Branched-chain amino acid transport ATP-binding protein livF (TC 3.A.1.4.1)                                                                                                       | 1126 | 3189856 | 3190560 | 63.92045455 | 88.556108  | 1.38541 |
| Branched-chain amino acid transport ATP-binding protein livG (TC 3.A.1.4.1)                                                                                                       | 1125 | 3190553 | 3191359 | 91.81141439 | 116.601117 | 1.27001 |

|                                                                                               |      |         |         |             |            |         |
|-----------------------------------------------------------------------------------------------|------|---------|---------|-------------|------------|---------|
| Branched-chain amino acid transport system permease protein livM (TC 3.A.1.4.1)               | 1124 | 3191349 | 3192344 | 51.25628141 | 88.8417085 | 1.73328 |
| High-affinity branched-chain amino acid transport system permease protein LivH (TC 3.A.1.4.1) | 1123 | 3192346 | 3193245 | 60.06674082 | 89.0133482 | 1.48191 |
| Branched-chain amino acid ABC transporter, amino acid-binding protein (TC 3.A.1.4.1)          | 1122 | 3193266 | 3194456 | 348.7394958 | 480.106723 | 1.37669 |
| Homolog of plant auxin-responsive GH3-like protein                                            | 1121 | 3194547 | 3196250 | 28.84049441 | 67.9117128 | 2.35473 |
| Glycoprotein gp2                                                                              | 1120 | 3196603 | 3198747 | 121.2686567 | 135.408582 | 1.1166  |
| Flagellar biosynthesis protein fliL                                                           | 1119 | 3198879 | 3199442 | 26.64298401 | 41.3188277 | 1.55083 |
| Potassium efflux system kefA / Small-conductance mechanosensitive channel                     | 1118 | 3199445 | 3200464 | 59.8626104  | 44.7443572 | 0.74745 |
| Mannose-6-phosphate isomerase                                                                 | 1117 | 3200552 | 3200896 | 279.0697674 | 238.034884 | 0.85296 |
| Glucosamine--fructose-6-phosphate aminotransferase [isomerizing] (EC 2.6.1.16)                | 1116 | 3200906 | 3202747 | 240.0436443 | 287.830606 | 1.19908 |
| Conserved protein                                                                             | 1114 | 3202797 | 3203354 | 114.9012567 | 162.043986 | 1.41029 |
| hypothetical protein                                                                          |      | 3203351 | 3203569 | 27.52293578 | 17.0733945 | 0.62033 |
| hypothetical protein                                                                          | 1113 | 3203606 | 3203863 | 0           | 0          | #DIV/0! |
| hypothetical protein                                                                          | 1112 | 3203836 | 3204054 | 13.76146789 | 0          | 0       |
| plasmid stability protein, putative                                                           | 1111 | 3204570 | 3204755 | 48.64864865 | 85.5054054 | 1.75761 |
| hypothetical protein                                                                          | 1110 | 3204968 | 3205240 | 102.9411765 | 153.943015 | 1.49545 |
| Fe-S oxidoreductase                                                                           | 1109 | 3205298 | 3206416 | 180.6797853 | 251.351521 | 1.39114 |
| Low-specificity L-threonine aldolase (EC 4.1.2.5)                                             | 1108 | 3206617 | 3207663 | 157.7437859 | 161.013862 | 1.02073 |
| Aminopeptidase YpdF (MP-, MA-, MS-, AP-, NP-specific)                                         | 1107 | 3207660 | 3208817 | 75.19446845 | 92.4870354 | 1.22997 |
| hypothetical protein                                                                          | 1106 | 3208830 | 3209279 | 48.99777283 | 43.5200445 | 0.8882  |
| Sll1036 protein                                                                               | 1105 | 3209325 | 3210128 | 105.8530511 | 92.7023661 | 0.87576 |
| Metal-dependent phosphohydrolase, HD subdomain                                                | 1104 | 3210253 | 3211110 | 85.18086348 | 123.77713  | 1.45311 |
| TPR domain protein, putative component of TonB system                                         | 1103 | 3211103 | 3212668 | 150.798722  | 153.398722 | 1.01724 |
| Fibronectin type III domain protein                                                           | 1102 | 3212665 | 3214467 | 93.22974473 | 79.004717  | 0.84742 |
| Excinuclease ABC subunit C                                                                    | 1101 | 3214451 | 3216496 | 46.45476773 | 72.801956  | 1.56716 |
| hypothetical protein                                                                          | 1100 | 3216617 | 3216823 | 0           | 18.0679612 | #DIV/0! |
| hypothetical protein                                                                          | 1099 | 3216835 | 3217158 | 18.57585139 | 5.76160991 | 0.31017 |
| possible <i>M. jannaschii</i> predicted coding region MJ1674                                  | 1098 | 3217182 | 3218513 | 28.54996243 | 24.4684448 | 0.85704 |
| CRISPR-associated RAMP protein, Csm5 family                                                   | 1097 | 3218510 | 3219670 | 45.68965517 | 36.8991379 | 0.8076  |
| hypothetical protein                                                                          | 1096 | 3219687 | 3220565 | 83.14350797 | 55.1093394 | 0.66282 |
| hypothetical protein                                                                          | 1095 | 3220575 | 3221249 | 56.37982196 | 53.8419881 | 0.95499 |
| unknown                                                                                       | 1094 | 3221279 | 3221770 | 67.20977597 | 75.8044807 | 1.12788 |
| hypothetical protein                                                                          | 1093 | 3221776 | 3223977 | 52.24897774 | 48.1949114 | 0.92241 |
| hypothetical protein                                                                          | 1092 | 3223987 | 3224934 | 62.30200634 | 56.0068638 | 0.89896 |
| Mannose-6-phosphate isomerase (EC 5.3.1.8)                                                    | 1091 | 3226012 | 3227220 | 211.9205298 | 281.923013 | 1.33032 |
| hypothetical protein                                                                          | 1090 | 3227268 | 3227846 | 204.1522491 | 194.793253 | 0.95416 |
| Flagellar filament outer layer protein                                                        | 1089 | 3227980 | 3228702 | 1087.257618 | 1116.08449 | 1.02651 |
| flagellar filament outer layer protein FlaA, putative                                         | 1088 | 3228715 | 3229446 | 894.6648427 | 784.114911 | 0.87643 |
| hypothetical protein                                                                          | 1087 | 3229589 | 3230515 | 110.1511879 | 84.4082073 | 0.76629 |



|                                                                                                                                                                       |      |         |         |             |            |         |
|-----------------------------------------------------------------------------------------------------------------------------------------------------------------------|------|---------|---------|-------------|------------|---------|
| hypothetical protein                                                                                                                                                  |      | 3230515 | 3230640 | 0           | 14.888     | #DIV/0! |
| Fructose-bisphosphate aldolase class II (EC 4.1.2.13)                                                                                                                 | 1085 | 3230677 | 3231675 | 702.811245  | 947.316265 | 1.3479  |
| similar to ENSANGP00000029682                                                                                                                                         | 1084 | 3231799 | 3234069 | 125.1101322 | 103.707709 | 0.82893 |
| hypothetical protein                                                                                                                                                  | 1083 | 3234117 | 3234803 | 11.66180758 | 2.71282799 | 0.23263 |
| hypothetical protein                                                                                                                                                  | 1082 | 3234816 | 3234947 | 45.80152672 | 28.4122137 | 0.62033 |
| Phosphatase                                                                                                                                                           | 1081 | 3234980 | 3236032 | 23.76425856 | 34.4957224 | 1.45158 |
| GTPase and tRNA-U34 5-formylation enzyme TrmE                                                                                                                         | 1080 | 3236035 | 3237513 | 71.04194858 | 64.2158322 | 0.90391 |
| tRNA uridine 5-carboxymethylaminomethyl modification enzyme gidA                                                                                                      | 1079 | 3237517 | 3239424 | 49.2920818  | 64.4079706 | 1.30666 |
| Protein crcB homolog                                                                                                                                                  | 1078 | 3239405 | 3239806 | 89.7755611  | 51.0498753 | 0.56864 |
| hypothetical protein                                                                                                                                                  |      | 3239799 | 3239933 | 97.01492537 | 83.3283582 | 0.85892 |
| HIT family protein                                                                                                                                                    | 1076 | 3239984 | 3240328 | 154.0697674 | 262.37936  | 1.70299 |
| Seryl-tRNA synthetase (EC 6.1.1.11)                                                                                                                                   | 1075 | 3240328 | 3241611 | 246.2977397 | 256.739673 | 1.0424  |
| hypothetical protein                                                                                                                                                  |      | 3241610 | 3241732 | 0           | 0          | #DIV/0! |
| hypothetical protein                                                                                                                                                  | 1073 | 3241864 | 3242028 | 6.097560976 | 5.67378049 | 0.9305  |
| Predicted cell-wall-anchored protein SasA (LPXTG motif)                                                                                                               | 1072 | 3242028 | 3244127 | 23.82086708 | 19.0621725 | 0.80023 |
| Cell surface protein                                                                                                                                                  | 1071 | 3244140 | 3246974 | 20.81863091 | 18.058398  | 0.86742 |
| Phosphoribosylformylglycinamide synthase, synthetase subunit (EC 6.3.5.3) / Phosphoribosylformylglycinamide synthase, glutamine amidotransferase subunit (EC 6.3.5.3) | 1070 | 3247034 | 3251158 | 101.1154219 | 109.430771 | 1.08224 |
| GTP-binding and nucleic acid-binding protein YchF                                                                                                                     | 1069 | 3251370 | 3252497 | 342.5022183 | 418.601154 | 1.22219 |
| cAMP-binding proteins - catabolite gene activator and regulatory subunit of cAMP-dependent protein kinases                                                            | 1068 | 3252510 | 3252956 | 163.67713   | 146.042601 | 0.89226 |
| Lysyl-tRNA synthetase-related protein                                                                                                                                 | 1067 | 3252965 | 3254020 | 103.3175355 | 127.006635 | 1.22928 |
| UDP-N-acetylmuramoylalanine--D-glutamate ligase (EC 6.3.2.9)                                                                                                          | 1066 | 3254033 | 3255478 | 89.96539792 | 101.099308 | 1.12376 |
| hypothetical protein                                                                                                                                                  | 1065 | 3255539 | 3256567 | 55.44747082 | 90.5155642 | 1.63246 |
| Methyltransferase                                                                                                                                                     | 1064 | 3256714 | 3257361 | 41.73106646 | 41.7071097 | 0.99943 |
| UDP-N-acetylmuramoylalanine--2,6-diaminopimelate ligase (EC 6.3.2.13)                                                                                                 | 1063 | 3257419 | 3259002 | 157.2962729 | 156.356917 | 0.99403 |
| MG(2+) CHELATASE FAMILY PROTEIN / ComM-related protein                                                                                                                | 1062 | 3259127 | 3260800 | 16.73640167 | 28.3655111 | 1.69484 |
| Putative regulatory protein                                                                                                                                           | 1061 | 3260832 | 3261392 | 21.42857143 | 29.9089286 | 1.39575 |
| hypothetical protein                                                                                                                                                  | 1060 | 3261403 | 3261519 | 0           | 8.02155172 | #DIV/0! |
| Permease of the drug/metabolite transporter (DMT) superfamily                                                                                                         | 1059 | 3261541 | 3262461 | 63.04347826 | 72.8217391 | 1.1551  |
| Sugar/maltose fermentation stimulation protein homolog                                                                                                                | 1058 | 3262454 | 3263671 | 19.72062449 | 24.4667214 | 1.24067 |
| BNR repeat domain protein                                                                                                                                             | 1057 | 3264103 | 3265707 | 1.246882793 | 0.58011222 | 0.46525 |
| hypothetical protein                                                                                                                                                  |      | 3265797 | 3265958 | 6.211180124 | 5.77950311 | 0.9305  |
| Ribosomal large subunit pseudouridine synthase A (EC 4.2.1.70)                                                                                                        | 1055 | 3266072 | 3266845 | 90.55627426 | 114.356404 | 1.26282 |
| Sensory box histidine kinase/response regulator                                                                                                                       | 1054 | 3266855 | 3270067 | 116.8224299 | 121.167913 | 1.0372  |
| Putative pheromone precursor lipoprotein                                                                                                                              | 1053 | 3270082 | 3270582 | 326         | 212.154    | 0.65078 |

|                                                                                                                                                                                                                                             |      |         |         |             |            |         |
|---------------------------------------------------------------------------------------------------------------------------------------------------------------------------------------------------------------------------------------------|------|---------|---------|-------------|------------|---------|
| Autoinducer 2 (AI-2) ABC transport system, periplasmic AI-2 binding protein LsrB                                                                                                                                                            | 1052 | 3270572 | 3271651 | 215.9406858 | 203.519926 | 0.94248 |
| Thiol peroxidase, Tpx-type (EC 1.11.1.15)                                                                                                                                                                                                   | 1050 | 3271809 | 3272324 | 153.3980583 | 99.3737864 | 0.64782 |
| hypothetical protein                                                                                                                                                                                                                        |      | 3272279 | 3272416 | 58.39416058 | 6.7919708  | 0.11631 |
| hypothetical protein                                                                                                                                                                                                                        | 1049 | 3272840 | 3272968 | 7.8125      | 0          | 0       |
| hypothetical protein                                                                                                                                                                                                                        | 1048 | 3273158 | 3273286 | 0           | 7.26953125 | #DIV/0! |
| TetR family transcriptional regulator probably coupled to RND multidrug efflux transporter                                                                                                                                                  | 1047 | 3273504 | 3274073 | 15.8172232  | 13.0826011 | 0.82711 |
| Iron-sulfur cluster-binding protein                                                                                                                                                                                                         | 1046 | 3274122 | 3275171 | 2.85986654  | 4.43517636 | 1.55083 |
| hypothetical protein                                                                                                                                                                                                                        | 1045 | 3275215 | 3275850 | 0           | 0          | #DIV/0! |
| Hypothetical SAV0801 homolog in superantigen-encoding pathogenicity islands SaPI                                                                                                                                                            | 1044 | 3275871 | 3276821 | 6.315789474 | 13.7126316 | 2.17117 |
| hypothetical protein                                                                                                                                                                                                                        | 1043 | 3276934 | 3277092 | 6.329113924 | 5.88924051 | 0.9305  |
| hypothetical protein                                                                                                                                                                                                                        | 1042 | 3277673 | 3277840 | 0           | 0          | #DIV/0! |
| Nitroreductase                                                                                                                                                                                                                              | 1041 | 3277981 | 3278607 | 6.389776358 | 23.7827476 | 3.722   |
| Transcriptional regulator, Cro/C1 family                                                                                                                                                                                                    | 1040 | 3278645 | 3278992 | 17.75147929 | 8.25887574 | 0.46525 |
| hypothetical protein                                                                                                                                                                                                                        | 1039 | 3279000 | 3279233 | 0           | 3.99356223 | #DIV/0! |
| hypothetical protein                                                                                                                                                                                                                        | 1038 | 3279554 | 3281041 | 2.017484869 | 1.25151311 | 0.62033 |
| hypothetical protein                                                                                                                                                                                                                        | 1037 | 3281038 | 3281829 | 1.264222503 | 2.35271808 | 1.861   |
| membrane protein, putative                                                                                                                                                                                                                  | 1036 | 3281834 | 3284452 | 1.145912911 | 1.06627196 | 0.9305  |
| Transcriptional regulator, AcrR family                                                                                                                                                                                                      | 1035 | 3284561 | 3285229 | 2.994011976 | 1.39296407 | 0.46525 |
| hypothetical protein                                                                                                                                                                                                                        |      | 3285304 | 3285438 | 149.2537313 | 55.5522388 | 0.3722  |
| S-adenosylmethionine synthetase (EC 2.5.1.6)                                                                                                                                                                                                | 1033 | 3285454 | 3286623 | 291.7023097 | 345.45509  | 1.18427 |
| putative outer membrane protein probably involved in nutrient binding                                                                                                                                                                       | 1032 | 3286720 | 3289389 | 34.84451105 | 36.6064069 | 1.05056 |
| hypothetical protein                                                                                                                                                                                                                        | 1031 | 3289425 | 3290579 | 77.98960139 | 91.9211438 | 1.17863 |
| Hypothetical protein YaeJ with similarity to translation release factor                                                                                                                                                                     | 1030 | 3290592 | 3291017 | 44.70588235 | 98.5235294 | 2.20382 |
| hypothetical protein                                                                                                                                                                                                                        | 1029 | 3291103 | 3292419 | 88.90577508 | 119.494301 | 1.34406 |
| Phosphoglycolate phosphatase (EC 3.1.3.18)                                                                                                                                                                                                  | 1028 | 3292432 | 3293097 | 63.15789474 | 64.3654135 | 1.01912 |
| hypothetical protein                                                                                                                                                                                                                        | 1027 | 3293103 | 3296222 | 161.849711  | 155.083333 | 0.95819 |
| Endonuclease III (EC 4.2.99.18)                                                                                                                                                                                                             | 1026 | 3296227 | 3297018 | 115.0442478 | 119.988622 | 1.04298 |
| 2-C-methyl-D-erythritol 2,4-cyclodiphosphate synthase (EC 4.6.1.12)                                                                                                                                                                         | 1025 | 3297029 | 3297502 | 209.3023256 | 157.378436 | 0.75192 |
| 2-C-methyl-D-erythritol 4-phosphate cytidyltransferase (EC 2.7.7.60) / 2-C-methyl-D-erythritol 2,4-cyclodiphosphate synthase (EC 4.6.1.12)                                                                                                  |      | 3297495 | 3298247 | 117.0212766 | 112.600399 | 0.96222 |
| Transcriptional regulator                                                                                                                                                                                                                   | 1023 | 3298257 | 3298760 | 455.2683897 | 505.022863 | 1.10929 |
| Surface protein                                                                                                                                                                                                                             | 1022 | 3298890 | 3301736 | 738.2290935 | 693.134223 | 0.93891 |
| Putative sugar transporter                                                                                                                                                                                                                  | 1021 | 3301894 | 3303249 | 28.04428044 | 12.3608856 | 0.44076 |
| hypothetical protein                                                                                                                                                                                                                        | 1020 | 3303518 | 3303775 | 3.891050584 | 0          | 0       |
| Helicase, SNF2/RAD54 family                                                                                                                                                                                                                 | 1019 | 3303793 | 3307449 | 63.73085339 | 71.7727024 | 1.12618 |
| putative outer membrane protein precursor                                                                                                                                                                                                   | 1018 | 3307594 | 3309042 | 582.1823204 | 783.342196 | 1.34553 |
| hypothetical protein                                                                                                                                                                                                                        | 1017 | 3309248 | 3309499 | 131.4741036 | 144.579681 | 1.09968 |
| contains Pfam domain, PF05193: Peptidase M16 inactive domain; go_function: metalloendopeptidase activity [goid 0004222]; go_process: proteolysis and peptidolysis [goid 0006508] / peptidase M16 family protein / insulinase family protein | 1016 | 3309531 | 3312632 | 70.9448565  | 87.0187036 | 1.22657 |

|                                                                 |      |         |         |             |            |         |
|-----------------------------------------------------------------|------|---------|---------|-------------|------------|---------|
| Flagellar motor switch protein fliG                             | 1015 | 3312629 | 3314323 | 61.3931523  | 83.4923259 | 1.35996 |
| Dihydroflavonol-4-reductase (EC 1.1.1.219)                      | 1014 | 3314306 | 3315328 | 110.5675147 | 144.764677 | 1.30929 |
| Ferredoxin                                                      | 1013 | 3315328 | 3316092 | 81.15183246 | 112.049738 | 1.38074 |
| hypothetical protein                                            | 1012 | 3316411 | 3317055 | 29.50310559 | 14.4487578 | 0.48974 |
| transposase, mutator family                                     | 1011 | 3317258 | 3318472 | 49.13793103 | 49.7336207 | 1.01212 |
| Transposase IS4 family                                          |      | 3318566 | 3319213 | 1.545595054 | 1.4381762  | 0.9305  |
| hypothetical protein                                            | 1009 | 3319764 | 3319880 | 25.86206897 | 16.0431034 | 0.62033 |
| hypothetical protein                                            |      | 3319904 | 3320152 | 0           | 0          | #DIV/0! |
| hypothetical protein                                            |      | 3320163 | 3320324 | 0           | 0          | #DIV/0! |
| hypothetical protein                                            | 1006 | 3320402 | 3320929 | 5.69259962  | 0          | 0       |
| Regulator of polyketide synthase expression                     | 1005 | 3321404 | 3322855 | 15.85113715 | 7.05410062 | 0.44502 |
| Uroporphyrinogen-III decarboxylase                              | 1004 | 3322984 | 3324237 | 19.15403033 | 5.94094174 | 0.31017 |
| Recombination protein O                                         | 1003 | 3324338 | 3325015 | 47.26735598 | 35.7355982 | 0.75603 |
| Pyrimidine-nucleoside phosphorylase (EC 2.4.2.2)                | 1002 | 3325043 | 3326347 | 118.0981595 | 112.744632 | 0.95467 |
| Single-stranded-DNA-specific exonuclease recJ (EC 3.1.-.-)      | 1001 | 3326382 | 3328526 | 139.9253731 | 149.730644 | 1.07008 |
| hypothetical protein                                            | 1000 | 3328559 | 3329203 | 62.11180124 | 44.7911491 | 0.72114 |
| Peptidase M23B precursor                                        | 999  | 3329338 | 3330504 | 21.44082333 | 25.5368782 | 1.19104 |
| SSU ribosomal protein S21p                                      | 998  | 3330600 | 3330812 | 1495.283019 | 1702.99057 | 1.13891 |
| hypothetical protein                                            | 997  | 3330852 | 3330968 | 34.48275862 | 32.0862069 | 0.9305  |
| 2',3'-cyclic-nucleotide 2'-phosphodiesterase (EC 3.1.4.16)      | 996  | 3331123 | 3331788 | 15.03759398 | 19.5894737 | 1.3027  |
| hypothetical protein                                            | 994  | 3331785 | 3331976 | 10.47120419 | 38.973822  | 3.722   |
| hypothetical protein                                            | 995  | 3331946 | 3332911 | 19.68911917 | 7.71398964 | 0.39179 |
| Aspartate aminotransferase (EC 2.6.1.1)                         | 993  | 3333307 | 3334653 | 49.03417533 | 67.7481426 | 1.38165 |
| hypothetical protein                                            | 992  | 3334892 | 3335011 | 0           | 0          | #DIV/0! |
| hypothetical protein                                            | 991  | 3335187 | 3335861 | 4.451038576 | 4.14169139 | 0.9305  |
| hypothetical protein                                            | 990  | 3335858 | 3336019 | 80.74534161 | 23.1180124 | 0.28631 |
| Acetyl-coenzyme A carboxyl transferase beta chain (EC 6.4.1.2)  | 989  | 3336020 | 3336838 | 353.3007335 | 404.96088  | 1.14622 |
| Acetyl-coenzyme A carboxyl transferase alpha chain (EC 6.4.1.2) | 988  | 3336838 | 3337638 | 232.5       | 330.3275   | 1.42076 |
| Long-chain-fatty-acid--CoA ligase (EC 6.2.1.3)                  | 987  | 3337645 | 3339387 | 73.47876005 | 85.4649828 | 1.16313 |
| FOG: GGDEF domain                                               | 986  | 3339389 | 3340798 | 154.0099361 | 153.212207 | 0.99482 |
| Uncharacterized protein TP_0273                                 | 985  | 3341292 | 3341681 | 46.27249357 | 38.2724936 | 0.82711 |
| hypothetical protein                                            | 984  | 3341683 | 3342414 | 9.575923393 | 7.6374829  | 0.79757 |
| Acetolactate synthase small subunit (EC 2.2.1.6)                | 983  | 3342622 | 3343137 | 357.2815534 | 375.813592 | 1.05187 |
| Ketol-acid reductoisomerase (EC 1.1.1.86)                       | 982  | 3343254 | 3344255 | 318.5035389 | 282.254803 | 0.88619 |
| 2-isopropylmalate synthase (EC 2.3.3.13)                        | 981  | 3344414 | 3345985 | 341.1839593 | 344.12508  | 1.00862 |
| 2-isopropylmalate synthase (EC 2.3.3.13)                        | 980  | 3345982 | 3347643 | 223.5150031 | 190.886405 | 0.85402 |
| 3-isopropylmalate dehydrogenase (EC 1.1.1.85)                   | 979  | 3347658 | 3348791 | 174.7572816 | 184.785966 | 1.05739 |
| hypothetical protein                                            |      | 3348811 | 3348990 | 50.27932961 | 31.1899441 | 0.62033 |
| Dihydroxy-acid dehydratase (EC 4.2.1.9)                         | 977  | 3348985 | 3350646 | 134.256472  | 133.888922 | 0.99726 |
| Acetolactate synthase large subunit (EC 2.2.1.6)                | 976  | 3350650 | 3352449 | 168.4269038 | 144.824903 | 0.85987 |
| Hypothetical similar to thiamin biosynthesis lipoprotein ApbE   | 974  | 3352433 | 3353461 | 77.82101167 | 58.8351167 | 0.75603 |
| hypothetical protein                                            | 975  | 3353447 | 3353560 | 8.849557522 | 8.23451327 | 0.9305  |
| Aryldialkylphosphatase related protein                          | 973  | 3353535 | 3354383 | 15.33018868 | 15.3620283 | 1.00208 |

|                                                                                                                                                                                   |     |         |         |             |            |         |
|-----------------------------------------------------------------------------------------------------------------------------------------------------------------------------------|-----|---------|---------|-------------|------------|---------|
| Heptaprenyl diphosphate synthase component I (EC 2.5.1.30)                                                                                                                        | 972 | 3354380 | 3355693 | 12.18583397 | 9.21287129 | 0.75603 |
| Uncharacterized protein TP_1032                                                                                                                                                   | 971 | 3355659 | 3356042 | 39.16449086 | 38.8720627 | 0.99253 |
| Carbon starvation protein A                                                                                                                                                       | 970 | 3356169 | 3357893 | 57.42459397 | 73.9434455 | 1.28766 |
|                                                                                                                                                                                   |     |         |         |             |            |         |
| sensory box histidine kinase/response regulator                                                                                                                                   | 969 | 3357896 | 3360127 | 121.4701927 | 138.886822 | 1.14338 |
| Transcriptional regulator, Cro/C1 family                                                                                                                                          | 968 | 3360135 | 3360488 | 144.4759207 | 134.434844 | 0.9305  |
| hypothetical protein                                                                                                                                                              | 967 | 3360472 | 3360594 | 8.196721311 | 7.62704918 | 0.9305  |
| 2-keto-3-deoxy-D-arabino-heptulosonate-7-phosphate synthase I beta (EC 2.5.1.54)                                                                                                  | 966 | 3360614 | 3362572 | 102.145046  | 125.460674 | 1.22826 |
| Putative ABC-type amino-acid transporter permease protein                                                                                                                         | 965 | 3362677 | 3363369 | 2.89017341  | 1.34465318 | 0.46525 |
| Putative ABC-type amino-acid transporter permease protein                                                                                                                         | 964 | 3363366 | 3364178 | 3.694581281 | 4.58374384 | 1.24067 |
| Major cell-binding factor precursor PebA                                                                                                                                          | 963 | 3364135 | 3364932 | 8.78293601  | 12.8425345 | 1.46221 |
| Amino-acid ABC transporter ATP-binding protein PebC                                                                                                                               | 962 | 3364950 | 3365672 | 5.540166205 | 6.44390582 | 1.16313 |
| Cell surface protein                                                                                                                                                              | 961 | 3366189 | 3367730 | 24.01038287 | 25.9646334 | 1.08139 |
| hypothetical protein                                                                                                                                                              | 960 | 3367806 | 3368381 | 153.0434783 | 121.369565 | 0.79304 |
| PTS system, fructose-specific IIA component (EC 2.7.1.69) / PTS system, fructose-specific IIB component (EC 2.7.1.69) / PTS system, fructose-specific IIC component (EC 2.7.1.69) | 959 | 3368579 | 3369064 | 84.53608247 | 80.5793814 | 0.9532  |
| TnpR protein                                                                                                                                                                      | 958 | 3369061 | 3371127 | 134.0755082 | 138.268877 | 1.03128 |
| Anaerobic dimethyl sulfoxide reductase chain A (EC 1.8.99.-)                                                                                                                      | 957 | 3371171 | 3374083 | 41.8956044  | 45.0551168 | 1.07541 |
| Diaminopimelate epimerase homolog                                                                                                                                                 | 956 | 3374095 | 3374886 | 94.81668774 | 76.4633375 | 0.80643 |
| Amino acid ABC transporter, amino acid-binding protein                                                                                                                            | 955 | 3374948 | 3375775 | 263.6033857 | 389.302297 | 1.47685 |
| ABC-type amino acid transport system, permease component                                                                                                                          | 954 | 3375778 | 3376479 | 161.1982882 | 220.346648 | 1.36693 |
| Glutamine transport ATP-binding protein glnQ (TC 3.A.1.3.2)                                                                                                                       | 953 | 3376499 | 3377248 | 38.04347826 | 84.7058424 | 2.22655 |
| hypothetical protein                                                                                                                                                              | 952 | 3377311 | 3377634 | 6.191950464 | 5.76160991 | 0.9305  |
| hypothetical protein                                                                                                                                                              | 951 | 3377624 | 3377755 | 0           | 0          | #DIV/0! |
| hypothetical protein                                                                                                                                                              |     | 3377715 | 3377975 | 0           | 3.57884615 | #DIV/0! |
| hypothetical protein                                                                                                                                                              | 949 | 3378454 | 3379245 | 5.056890013 | 0          | 0       |
| Bpml endonuclease-methyltransferase fusion protein type IIG                                                                                                                       | 948 | 3379332 | 3382187 | 54.29071804 | 58.3395797 | 1.07458 |
| hypothetical protein                                                                                                                                                              | 947 | 3382231 | 3382392 | 0           | 0          | #DIV/0! |
| Transcriptional regulator, DeoR family                                                                                                                                            | 946 | 3382467 | 3383468 | 14.01401401 | 14.9029029 | 1.06343 |
| Probable DNA polymerase III polC-type (EC 2.7.7.7) (EC 6.5.1.2)                                                                                                                   | 945 | 3383740 | 3384018 | 43.16546763 | 40.1654676 | 0.9305  |
| hypothetical protein                                                                                                                                                              | 944 | 3384036 | 3384368 | 63.25301205 | 72.8704819 | 1.15205 |
| hypothetical protein                                                                                                                                                              | 943 | 3384964 | 3386223 | 3.177124702 | 0.73907863 | 0.23263 |
| hypothetical protein                                                                                                                                                              | 942 | 3386237 | 3387358 | 0           | 0.83006244 | #DIV/0! |
| MoxR-like ATPases                                                                                                                                                                 | 941 | 3387376 | 3388443 | 1.874414246 | 0          | 0       |
| hypothetical protein                                                                                                                                                              |     | 3388447 | 3389142 | 1.438848921 | 1.33884892 | 0.9305  |
| Xaa-Pro dipeptidase (EC 3.4.13.9)                                                                                                                                                 | 939 | 3389440 | 3390564 | 121.886121  | 103.480872 | 0.849   |
| L-Aspartate dehydrogenase (EC 1.4.1.21)                                                                                                                                           | 938 | 3390581 | 3391402 | 107.1863581 | 91.8032887 | 0.85648 |

|                                                                                                                           |     |         |         |             |            |         |
|---------------------------------------------------------------------------------------------------------------------------|-----|---------|---------|-------------|------------|---------|
| Pyrrolidone-carboxylate peptidase (EC 3.4.19.3)<br>(5-oxoprolyl-peptidase) (Pyroglutamyl-peptidase I)<br>(PGP-I) (Pyrase) | 937 | 3391402 | 3392007 | 90.90909091 | 133.807438 | 1.47188 |
| Oligopeptide ABC transporter, periplasmic<br>oligopeptide-binding protein oppA (TC 3.A.1.5.1)                             | 936 | 3392086 | 3393639 | 206.052801  | 199.521249 | 0.9683  |
| Dipeptide transport system permease protein<br>dppC (TC 3.A.1.5.2)                                                        | 935 | 3393701 | 3394597 | 65.84821429 | 73.733817  | 1.11975 |
| Dipeptide transport system permease protein<br>dppB (TC 3.A.1.5.2)                                                        | 934 | 3394597 | 3395544 | 116.156283  | 156.229673 | 1.345   |
| Oligopeptide transport ATP-binding protein oppD<br>(TC 3.A.1.5.1)                                                         | 933 | 3395666 | 3396646 | 26.53061224 | 37.030102  | 1.39575 |
| Oligopeptide transport ATP-binding protein oppF<br>(TC 3.A.1.5.1)                                                         | 932 | 3396661 | 3397644 | 30.51881994 | 30.2909461 | 0.99253 |
| DNA-directed RNA polymerase beta' subunit (EC<br>2.7.7.6)                                                                 | 931 | 3397724 | 3402061 | 616.5743306 | 797.970337 | 1.2942  |
| DNA-directed RNA polymerase beta subunit (EC<br>2.7.7.6)                                                                  | 930 | 3402091 | 3405624 | 502.8538813 | 536.418379 | 1.06675 |
| LSU ribosomal protein L7/L12 (L23e)                                                                                       | 929 | 3405765 | 3406151 | 577.7202073 | 520.694301 | 0.90129 |
| LSU ribosomal protein L10p (P0)                                                                                           | 928 | 3406296 | 3406847 | 911.0707804 | 868.016334 | 0.95274 |
| LSU ribosomal protein L1p (L10Ae)                                                                                         | 927 | 3406924 | 3407604 | 582.3529412 | 615.772059 | 1.05739 |
| LSU ribosomal protein L11p (L12e)                                                                                         | 926 | 3407601 | 3408032 | 1821.345708 | 1660.21926 | 0.91153 |
| Transcription antitermination protein NusG                                                                                | 925 | 3408115 | 3408717 | 501.6611296 | 508.52907  | 1.01369 |
| Preprotein translocase subunit SecE (TC<br>3.A.5.1.1)                                                                     | 924 | 3408698 | 3408877 | 212.2905028 | 166.346369 | 0.78358 |
| hypothetical protein                                                                                                      |     | 3408860 | 3408997 | 700.729927  | 427.894161 | 0.61064 |
| LSU ribosomal protein L33p                                                                                                | 921 | 3409160 | 3409333 | 2780.346821 | 2587.11272 | 0.9305  |
| hypothetical protein                                                                                                      |     | 3409480 | 3409626 | 54.79452055 | 19.119863  | 0.34894 |
| Purine nucleoside phosphorylase (EC 2.4.2.1)                                                                              | 918 | 3409615 | 3410319 | 93.75       | 80.6257102 | 0.86001 |
| sensory box histidine kinase/response regulator                                                                           | 917 | 3410367 | 3413306 | 64.30758761 | 85.7997618 | 1.33421 |
| ABC transporter substrate-binding protein - sugar<br>transport                                                            | 916 | 3413321 | 3414715 | 93.25681492 | 73.4253945 | 0.78735 |
| Tn916, transposase                                                                                                        | 914 | 3415105 | 3416313 | 12.41721854 | 6.16225166 | 0.49627 |
| plasmid partition protein, putative                                                                                       | 913 | 3416316 | 3417086 | 3.896103896 | 6.04220779 | 1.55083 |
| Chromosome (plasmid) partitioning protein ParB /<br>Stage 0 sporulation protein J                                         | 912 | 3417086 | 3417949 | 6.952491309 | 3.23464658 | 0.46525 |
| hypothetical protein                                                                                                      | 911 | 3418736 | 3420652 | 12.52609603 | 7.77035491 | 0.62033 |
| hypothetical protein                                                                                                      |     | 3420825 | 3420980 | 0           | 6.00322581 | #DIV/0! |
| hypothetical protein                                                                                                      | 909 | 3421167 | 3422387 | 0           | 0          | #DIV/0! |
| hypothetical protein                                                                                                      | 908 | 3422537 | 3422725 | 0           | 0          | #DIV/0! |
| hypothetical protein                                                                                                      | 907 | 3423523 | 3423699 | 0           | 0          | #DIV/0! |
| hypothetical protein                                                                                                      | 906 | 3423731 | 3424570 | 9.535160906 | 8.87246722 | 0.9305  |
| hypothetical protein                                                                                                      |     | 3424581 | 3424718 | 0           | 0          | #DIV/0! |
| DNA polymerase III alpha subunit (EC 2.7.7.7)                                                                             | 904 | 3424743 | 3427691 | 21.26917713 | 21.737622  | 1.02202 |
| DNA polymerase IV (EC 2.7.7.7)                                                                                            | 903 | 3427684 | 3428901 | 27.54590985 | 31.8451586 | 1.15608 |
| COG1801: Uncharacterized conserved protein                                                                                | 902 | 3428904 | 3429707 | 36.75538657 | 25.9455006 | 0.7059  |
| transcriptional regulator, putative                                                                                       | 901 | 3429819 | 3430442 | 14.19878296 | 28.311359  | 1.99393 |
| hypothetical protein                                                                                                      | 900 | 3430474 | 3432309 | 7.629427793 | 3.04250681 | 0.39879 |
| hypothetical protein                                                                                                      | 899 | 3432400 | 3433143 | 1.34589502  | 0          | 0       |
| DNA repair protein RadC                                                                                                   | 898 | 3433297 | 3433764 | 0           | 0          | #DIV/0! |
| Threonyl-tRNA synthetase (EC 6.1.1.3)                                                                                     | 897 | 3433910 | 3434833 | 5.417118093 | 10.0812568 | 1.861   |



|                                                                                                 |     |         |         |             |            |         |
|-------------------------------------------------------------------------------------------------|-----|---------|---------|-------------|------------|---------|
| hypothetical protein                                                                            | 896 | 3434933 | 3435469 | 0           | 1.73600746 | #DIV/0! |
| hypothetical protein                                                                            | 895 | 3435542 | 3435766 | 0           | 0          | #DIV/0! |
| hypothetical protein                                                                            | 894 | 3435756 | 3436004 | 0           | 0          | #DIV/0! |
| hypothetical protein                                                                            | 893 | 3436006 | 3436485 | 2.087682672 | 3.88517745 | 1.861   |
| hypothetical protein                                                                            | 892 | 3436485 | 3437363 | 1.138952164 | 2.11958998 | 1.861   |
| hypothetical protein                                                                            | 891 | 3437378 | 3437587 | 0           | 0          | #DIV/0! |
| hypothetical protein                                                                            | 890 | 3437587 | 3437784 | 10.15228426 | 0          | 0       |
| Putative bacteriophage protein                                                                  | 889 | 3438064 | 3439125 | 4.712535344 | 5.26201697 | 1.1166  |
| hypothetical protein                                                                            | 888 | 3439198 | 3439968 | 0           | 0          | #DIV/0! |
| Single-stranded DNA-binding protein                                                             | 887 | 3440033 | 3440428 | 0           | 0          | #DIV/0! |
| hypothetical protein                                                                            | 886 | 3440496 | 3441326 | 0           | 1.12108434 | #DIV/0! |
| hypothetical protein                                                                            | 885 | 3441316 | 3441705 | 0           | 0          | #DIV/0! |
| hypothetical protein                                                                            | 884 | 3441809 | 3442150 | 5.865102639 | 5.45747801 | 0.9305  |
| hypothetical protein                                                                            | 883 | 3442153 | 3442344 | 0           | 9.7434555  | #DIV/0! |
| hypothetical protein                                                                            | 882 | 3442357 | 3442878 | 0           | 1.78598848 | #DIV/0! |
| Cell wall-associated hydrolases (invasion-associated proteins)                                  | 881 | 3442866 | 3443420 | 0           | 1.67960289 | #DIV/0! |
| hypothetical protein                                                                            | 880 | 3443465 | 3444061 | 0           | 0          | #DIV/0! |
| hypothetical protein                                                                            | 879 | 3444064 | 3444984 | 1.086956522 | 1.01141304 | 0.9305  |
| hypothetical protein                                                                            | 878 | 3445160 | 3445873 | 0           | 1.30504909 | #DIV/0! |
| hypothetical protein                                                                            | 876 | 3445955 | 3446086 | 0           | 0          | #DIV/0! |
| hypothetical protein                                                                            | 877 | 3446059 | 3446307 | 0           | 0          | #DIV/0! |
| Flagellar hook-length control protein fliK                                                      | 875 | 3446448 | 3448193 | 2.865329513 | 3.73266476 | 1.3027  |
| hypothetical protein                                                                            | 874 | 3448200 | 3448658 | 4.366812227 | 0          | 0       |
| hypothetical protein                                                                            | 873 | 3448655 | 3448768 | 0           | 8.23451327 | #DIV/0! |
| hypothetical protein                                                                            | 872 | 3448785 | 3449036 | 282.8685259 | 170.52988  | 0.60286 |
| hypothetical protein                                                                            | 871 | 3449046 | 3449276 | 747.826087  | 805.084783 | 1.07657 |
| hypothetical protein                                                                            | 870 | 3449379 | 3449582 | 73.89162562 | 64.1724138 | 0.86847 |
| hypothetical protein                                                                            | 869 | 3449569 | 3449694 | 72          | 37.22      | 0.51694 |
| Surface proteins containing Ig-like domains-like precursor                                      | 868 | 3449771 | 3451861 | 99.5215311  | 98.3925837 | 0.98866 |
| Flagellar hook-length control protein fliK                                                      |     | 3452127 | 3455642 | 83.92603129 | 70.9456615 | 0.84534 |
| hypothetical protein                                                                            | 866 | 3455639 | 3456160 | 15.35508637 | 10.7159309 | 0.69788 |
| hypothetical protein                                                                            | 865 | 3456138 | 3456257 | 8.403361345 | 39.0966387 | 4.6525  |
| Transposase and inactivated derivatives                                                         | 864 | 3456361 | 3456963 | 3.322259136 | 0          | 0       |
| hypothetical protein                                                                            | 863 | 3457088 | 3457390 | 0           | 0          | #DIV/0! |
| hypothetical protein                                                                            | 862 | 3457552 | 3458037 | 2.06185567  | 0          | 0       |
| hypothetical protein                                                                            | 861 | 3458194 | 3458379 | 10.81081081 | 15.0891892 | 1.39575 |
| TRAP-type C4-dicarboxylate transport system, periplasmic component                              | 860 | 3459180 | 3460193 | 177.0524233 | 181.314045 | 1.02407 |
| TRAP-type transport system, large permease component, predicted N-acetylneuraminate transporter | 859 | 3460190 | 3462076 | 80.44752264 | 78.8223229 | 0.9798  |
| hypothetical protein                                                                            | 857 | 3462087 | 3462908 | 80.48780488 | 66.9506098 | 0.83181 |
| 2-haloalkanoic acid dehalogenase (EC 3.8.1.2)                                                   | 858 | 3462887 | 3463252 | 49.31506849 | 63.7328767 | 1.29236 |
| Homolog of plant auxin-responsive GH3-like protein                                              | 856 | 3463528 | 3465228 | 591.0757946 | 594.359719 | 1.00556 |
| FOG: CheY-like receiver                                                                         | 855 | 3465339 | 3469112 | 54.02394876 | 65.0391256 | 1.20389 |
| Adenylate kinase (EC 2.7.4.3)                                                                   | 854 | 3469206 | 3469841 | 256.6929134 | 249.110236 | 0.97046 |
| Metal transporter, ZIP family                                                                   | 853 | 3469890 | 3470699 | 50.67985167 | 43.7070457 | 0.86241 |
| Radical SAM domain protein                                                                      | 852 | 3470771 | 3471640 | 27.61795167 | 20.344649  | 0.73665 |
| Capsule biosynthesis protein capA                                                               | 851 | 3471819 | 3473474 | 74.32024169 | 87.7087613 | 1.18015 |

|                                                                                       |     |         |         |             |            |         |
|---------------------------------------------------------------------------------------|-----|---------|---------|-------------|------------|---------|
| LSU ribosomal protein L28p                                                            | 850 | 3473502 | 3473693 | 1397.905759 | 2153.30366 | 1.54038 |
| serine protease inhibitor                                                             | 849 | 3473802 | 3474389 | 359.4548552 | 380.44293  | 1.05839 |
| 5-formyltetrahydrofolate cyclo-ligase (EC 6.3.3.2)                                    | 848 | 3474405 | 3475019 | 213.3550489 | 210.650651 | 0.98732 |
| hypothetical protein                                                                  | 847 | 3475041 | 3475634 | 32.04047218 | 32.9519393 | 1.02845 |
| Conserved domain protein                                                              | 846 | 3475644 | 3475949 | 9.836065574 | 21.3557377 | 2.17117 |
| hypothetical protein                                                                  | 845 | 3476052 | 3476207 | 6.451612903 | 0          | 0       |
| Transcriptional regulator, HxlR family                                                | 843 | 3476161 | 3476523 | 74.58563536 | 84.8245856 | 1.13728 |
| Acyl-ACP thioesterase                                                                 | 844 | 3476520 | 3477263 | 59.21938089 | 51.346568  | 0.86706 |
| hypothetical protein                                                                  | 842 | 3477305 | 3478495 | 28.57142857 | 31.2773109 | 1.09471 |
| hypothetical protein                                                                  | 841 | 3478495 | 3481254 | 35.15766582 | 22.5964117 | 0.64272 |
| Mg-protoporphyrin IX monomethyl ester oxidative cyclase                               | 840 | 3481408 | 3482922 | 37.64861295 | 49.1677675 | 1.30596 |
| Putative 5'(3')-deoxyribonucleotidase (EC 3.1.3.-)                                    | 839 | 3482927 | 3483556 | 115.5698234 | 156.825843 | 1.35698 |
| Glycogen debranching enzyme (EC 3.2.1.-)                                              | 838 | 3483572 | 3485725 | 123.5485369 | 131.385044 | 1.06343 |
| Leucyl/phenylalanyl-tRNA--protein transferase (EC 2.3.2.6)                            | 837 | 3485735 | 3486571 | 31.10047847 | 32.27811   | 1.03787 |
| Cystathionine beta-lyase (EC 4.4.1.8)                                                 | 836 | 3486570 | 3487823 | 196.3288109 | 235.409816 | 1.19906 |
| Methionine ABC transporter substrate-binding protein                                  |     | 3487923 | 3488324 | 92.26932668 | 139.226933 | 1.50892 |
| Methionine ABC transporter substrate-binding protein                                  |     | 3488353 | 3488733 | 42.10526316 | 51.4223684 | 1.22128 |
| Methionine ABC transporter ATP-binding protein                                        | 833 | 3488803 | 3489852 | 13.34604385 | 9.75738799 | 0.73111 |
| Methionine ABC transporter permease protein                                           | 832 | 3489845 | 3490525 | 8.823529412 | 15.0522059 | 1.70592 |
| N-acetyl-L,L-diaminopimelate deacetylase homolog (EC 3.5.1.18)                        | 831 | 3490539 | 3491702 | 23.21582115 | 27.2029235 | 1.17174 |
| putative peptide transport system secreted peptide-binding protein                    | 830 | 3491838 | 3493442 | 278.6783042 | 361.990025 | 1.29895 |
| Aspartyl aminopeptidase                                                               | 829 | 3493607 | 3495016 | 50.39034776 | 46.8882186 | 0.9305  |
| Oligopeptide transport ATP-binding protein oppF (TC 3.A.1.5.1)                        | 828 | 3495034 | 3496026 | 38.30645161 | 57.218246  | 1.4937  |
| Oligopeptide transport ATP-binding protein oppD (TC 3.A.1.5.1)                        | 827 | 3496029 | 3497054 | 67.44868035 | 92.7771261 | 1.37552 |
| Oligopeptide ABC transporter, permease                                                | 826 | 3497044 | 3497982 | 23.45415778 | 24.8001066 | 1.05739 |
| Putative glutathione transporter, permease component                                  | 825 | 3497979 | 3499025 | 40.15296367 | 56.043499  | 1.39575 |
| Type I restriction-modification system, DNA-methyltransferase subunit M (EC 2.1.1.72) | 824 | 3499205 | 3500671 | 150.7503411 | 211.996589 | 1.40628 |
| hypothetical protein                                                                  | 823 | 3500668 | 3500892 | 58.03571429 | 33.2321429 | 0.57262 |
| Conserved protein                                                                     | 822 | 3500889 | 3501371 | 49.79253112 | 40.5404564 | 0.81419 |
| hypothetical protein                                                                  | 821 | 3501368 | 3501619 | 43.8247012  | 33.3645418 | 0.76132 |
| Type I restriction-modification system, specificity subunit S (EC 3.1.21.3)           | 820 | 3501621 | 3502736 | 48.43049327 | 43.3955157 | 0.89604 |
| Tyrosine recombinase xerC                                                             | 819 | 3502796 | 3503788 | 26.20967742 | 20.6360887 | 0.78735 |
| Type I restriction-modification system, specificity subunit S (EC 3.1.21.3)           | 818 | 3503811 | 3504440 | 11.12877583 | 7.39666137 | 0.66464 |
| Type I restriction-modification system, restriction subunit R (EC 3.1.21.3)           | 817 | 3504553 | 3507948 | 13.25478645 | 18.637408  | 1.40609 |
| hypothetical protein                                                                  |     | 3508101 | 3508295 | 56.70103093 | 43.1675258 | 0.76132 |
| hypothetical protein                                                                  | 815 | 3508396 | 3508671 | 65.45454545 | 81.2072727 | 1.24067 |

|                                                                           |     |         |         |             |            |         |
|---------------------------------------------------------------------------|-----|---------|---------|-------------|------------|---------|
| hypothetical protein                                                      |     | 3509185 | 3509301 | 0           | 0          | #DIV/0! |
| hypothetical protein                                                      | 813 | 3509482 | 3510456 | 105.7494867 | 59.2310062 | 0.56011 |
| hypothetical protein                                                      | 812 | 3510473 | 3511777 | 64.41717791 | 56.372316  | 0.87511 |
| Leucine-rich repeat containing protein                                    | 811 | 3511948 | 3513660 | 7.009345794 | 3.26109813 | 0.46525 |
| hypothetical protein                                                      | 810 | 3513731 | 3514150 | 2.386634845 | 0          | 0       |
| hypothetical protein                                                      | 809 | 3514418 | 3516091 | 3.586371787 | 1.11237298 | 0.31017 |
| Aerobic cobaltochelatase cobS subunit (EC 6.6.1.2)                        | 808 | 3516109 | 3517284 | 1.70212766  | 7.91914894 | 4.6525  |
| hypothetical protein                                                      |     | 3517425 | 3517550 | 8           | 29.776     | 3.722   |
| Uncharacterized protein TP_0783                                           | 805 | 3518008 | 3519222 | 112.0263591 | 124.168863 | 1.10839 |
| T. pallidum predicted coding region TP0782                                | 804 | 3519225 | 3520088 | 159.9073001 | 160.654114 | 1.00467 |
| Methyltransferase/methylase                                               | 803 | 3520095 | 3520979 | 57.69230769 | 84.2081448 | 1.45961 |
| Na <sup>+</sup> -driven multidrug efflux pump                             | 802 | 3520995 | 3522365 | 24.08759124 | 30.5638686 | 1.26886 |
| Phosphoglycolate phosphatase (EC 3.1.3.18)                                | 801 | 3522364 | 3523098 | 100.8174387 | 102.684605 | 1.01852 |
| hypothetical protein                                                      | 800 | 3523106 | 3523417 | 38.585209   | 74.7990354 | 1.93854 |
| COG2078: Uncharacterized ACR                                              | 799 | 3523456 | 3524031 | 85.2173913  | 129.46087  | 1.51918 |
| Branched-chain amino acid transport protein                               | 798 | 3524073 | 3524807 | 54.49591281 | 57.0470027 | 1.04681 |
| branched-chain amino acid transport                                       | 797 | 3524800 | 3525159 | 41.78272981 | 57.0222841 | 1.36473 |
| ABC transporter permease protein                                          | 796 | 3525217 | 3525987 | 46.75324675 | 45.9207792 | 0.98219 |
| Putative ABC transporter ATP-binding protein                              | 795 | 3525995 | 3526732 | 122.1166893 | 111.104478 | 0.90982 |
| ABC transporter substrate binding protein (EC 2.5.1.47)                   | 794 | 3526729 | 3527772 | 104.506232  | 72.2631831 | 0.69147 |
| Tetratricopeptide TPR_2                                                   | 793 | 3527800 | 3528732 | 101.9313305 | 97.8422747 | 0.95988 |
| biphenyl-2,3-diol 1,2-dioxygenase III-related protein                     | 791 | 3528734 | 3529123 | 43.70179949 | 45.4485861 | 1.03997 |
| hypothetical protein                                                      | 792 | 3529101 | 3529274 | 5.780346821 | 21.5144509 | 3.722   |
| hypothetical protein                                                      | 790 | 3529318 | 3530232 | 73.30415755 | 58.0289934 | 0.79162 |
| hypothetical protein                                                      | 789 | 3530261 | 3530425 | 170.7317073 | 107.801829 | 0.63141 |
| hypothetical protein                                                      |     | 3530451 | 3530573 | 65.57377049 | 160.168033 | 2.44256 |
| hypothetical protein                                                      |     | 3530755 | 3531003 | 92.74193548 | 161.336694 | 1.73963 |
| cell surface protein                                                      | 786 | 3531013 | 3531891 | 23.91799544 | 21.1958998 | 0.88619 |
| hypothetical protein                                                      | 785 | 3532306 | 3532704 | 7.537688442 | 4.6758794  | 0.62033 |
| hypothetical protein                                                      | 784 | 3532701 | 3532910 | 9.56937799  | 4.45215311 | 0.46525 |
| hypothetical protein                                                      | 783 | 3533243 | 3533470 | 8.810572687 | 4.09911894 | 0.46525 |
| hypothetical protein                                                      | 782 | 3533647 | 3534048 | 149.6259352 | 116.022444 | 0.77542 |
| Alanyl-tRNA synthetase (EC 6.1.1.7)                                       | 781 | 3534187 | 3535977 | 312.886888  | 348.217501 | 1.11292 |
| Peptidyl-prolyl cis-trans isomerase ppiD (EC 5.2.1.8)                     | 780 | 3536041 | 3537399 | 381.443299  | 404.952504 | 1.06163 |
| Transcription termination protein NusB                                    | 779 | 3537403 | 3537909 | 243.083004  | 163.66502  | 0.67329 |
| hypothetical protein                                                      | 778 | 3537906 | 3539639 | 61.74264282 | 90.7412002 | 1.46967 |
| hypothetical protein                                                      | 777 | 3539687 | 3540295 | 164.4736842 | 131.616776 | 0.80023 |
| Enolase (EC 4.2.1.11)                                                     | 776 | 3540528 | 3541829 | 850.5836576 | 966.706226 | 1.13652 |
| Phosphoenolpyruvate-protein phosphotransferase of PTS system (EC 2.7.3.9) | 775 | 3541911 | 3542084 | 5.780346821 | 0          | 0       |
| Phage-related protein                                                     | 774 | 3542127 | 3542432 | 72.13114754 | 15.2540984 | 0.21148 |
| Cro repressor helix-turn-helix motif:Helix-turn-helix motif               | 773 | 3542419 | 3542706 | 125.4355401 | 64.8432056 | 0.51694 |
| hypothetical protein                                                      |     | 3542927 | 3543043 | 51.72413793 | 16.0431034 | 0.31017 |
| hypothetical protein                                                      | 770 | 3543423 | 3545093 | 144.5710858 | 108.846731 | 0.75289 |
| hypothetical protein                                                      | 769 | 3545109 | 3545381 | 80.88235294 | 68.4191176 | 0.84591 |
| Lipoprotein signal peptidase (EC 3.4.23.36)                               | 768 | 3545365 | 3545919 | 138.9891697 | 142.766245 | 1.02718 |

|                                                                                                                |     |         |         |             |            |         |
|----------------------------------------------------------------------------------------------------------------|-----|---------|---------|-------------|------------|---------|
| Hypothetical protein ybgl                                                                                      | 767 | 3545931 | 3546692 | 128.7779238 | 106.377792 | 0.82606 |
| hypothetical protein                                                                                           | 766 | 3546689 | 3548152 | 24.60697198 | 50.245728  | 2.04193 |
| Uncharacterized protein TP_0073                                                                                | 765 | 3548295 | 3549785 | 117.6075269 | 127.568548 | 1.0847  |
| RNA-binding protein                                                                                            | 764 | 3549927 | 3550196 | 2501.858736 | 2577.03532 | 1.03005 |
| hypothetical protein                                                                                           |     | 3550197 | 3550334 | 781.0218978 | 482.229927 | 0.61743 |
| hypothetical protein                                                                                           | 763 | 3550294 | 3550488 | 231.9587629 | 47.9639175 | 0.20678 |
| RNA-binding protein                                                                                            |     | 3550991 | 3551206 | 9730.232558 | 8937.12791 | 0.91849 |
| hypothetical protein                                                                                           | 760 | 3551312 | 3551680 | 187.5       | 209.868207 | 1.1193  |
| hypothetical protein                                                                                           | 759 | 3551682 | 3552263 | 86.05851979 | 120.116179 | 1.39575 |
| unknown                                                                                                        | 758 | 3552264 | 3553262 | 190.3807615 | 178.081663 | 0.9354  |
| unknown                                                                                                        | 757 | 3553326 | 3554957 | 69.28264868 | 94.1339669 | 1.35869 |
| Methylcobalamin:coenzyme M methyltransferase, methanol-specific                                                | 756 | 3555023 | 3556060 | 20.25072324 | 32.3027965 | 1.59514 |
| Dimethylamine corrinoid protein 2                                                                              | 755 | 3556057 | 3556752 | 97.84172662 | 73.6366906 | 0.75261 |
| Conserved protein                                                                                              | 754 | 3556786 | 3557361 | 38.26086957 | 29.1286957 | 0.76132 |
| Methylcobalamin:coenzyme M methyltransferase, methanol-specific                                                | 753 | 3557362 | 3558390 | 39.88326848 | 31.6804475 | 0.79433 |
| hypothetical protein                                                                                           | 752 | 3558501 | 3558662 | 0           | 0          | #DIV/0! |
| hypothetical protein                                                                                           | 751 | 3558743 | 3558886 | 139.8601399 | 65.0699301 | 0.46525 |
| Outer membrane autotransporter barrel                                                                          | 750 | 3558879 | 3561737 | 251.9244227 | 281.624388 | 1.11789 |
| ATP-dependent DNA helicase pcrA (EC 3.6.1.-)                                                                   | 749 | 3561838 | 3565197 | 27.99285289 | 31.3122394 | 1.11858 |
| Deoxyribonuclease-1 precursor (EC 3.1.21.1)                                                                    | 748 | 3565216 | 3566082 | 24.24942263 | 18.2661663 | 0.75326 |
| hypothetical protein                                                                                           | 747 | 3566095 | 3570063 | 17.64112903 | 8.6765373  | 0.49184 |
| Nitroreductase                                                                                                 | 746 | 3570177 | 3570791 | 4.885993485 | 15.1547231 | 3.10167 |
| Iron-sulfur cluster-binding protein                                                                            | 745 | 3570944 | 3571783 | 0           | 3.32717521 | #DIV/0! |
| Rrf2 family transcriptional regulator, group III                                                               | 744 | 3571979 | 3572464 | 37.11340206 | 42.2082474 | 1.13728 |
| hypothetical protein                                                                                           | 743 | 3572496 | 3572831 | 41.79104478 | 13.8880597 | 0.33232 |
| Gsl2900 protein                                                                                                | 742 | 3572877 | 3573077 | 0           | 0          | #DIV/0! |
| hypothetical protein                                                                                           | 741 | 3573165 | 3573452 | 48.7804878  | 32.4216028 | 0.66464 |
| hypothetical protein                                                                                           | 740 | 3573528 | 3574283 | 5.298013245 | 2.46490066 | 0.46525 |
| hypothetical protein                                                                                           | 739 | 3574349 | 3574747 | 2.512562814 | 2.3379397  | 0.9305  |
| Transposase                                                                                                    | 738 | 3574869 | 3575924 | 26.54028436 | 22.049763  | 0.8308  |
| hypothetical protein                                                                                           |     | 3576080 | 3576268 | 0           | 0          | #DIV/0! |
| hypothetical protein                                                                                           |     | 3576358 | 3576567 | 63.7254902  | 77.5416667 | 1.21681 |
| Glycyl-tRNA synthetase (EC 6.1.1.14)                                                                           | 735 | 3576708 | 3578096 | 335.0144092 | 351.954251 | 1.05056 |
| Acylphosphate phosphohydrolase (EC 3.6.1.7), putative                                                          | 734 | 3578109 | 3578405 | 91.21621622 | 100.594595 | 1.10281 |
| Putative sugar transporter                                                                                     | 733 | 3578415 | 3579758 | 47.65450484 | 47.1139241 | 0.98866 |
| Exonuclease SbcC                                                                                               | 731 | 3580249 | 3583431 | 21.68447517 | 30.7047454 | 1.41598 |
| Exonuclease SbcD                                                                                               | 730 | 3583428 | 3584693 | 12.64822134 | 11.0335968 | 0.87234 |
| Galactose/methyl galactoside ABC transport system, D-galactose-binding periplasmic protein MglB (TC 3.A.1.2.3) | 729 | 3584819 | 3585832 | 6495.557749 | 7106.88894 | 1.09412 |
| Galactose/methyl galactoside ABC transport system, ATP-binding protein MglA (EC 3.6.3.17)                      | 728 | 3585909 | 3587423 | 308.4544254 | 290.089828 | 0.94046 |
| Galactose/methyl galactoside ABC transport system, permease protein MglC (TC 3.A.1.2.3)                        | 727 | 3587438 | 3588478 | 274.0384615 | 294.360096 | 1.07416 |
| Multidrug resistance ABC transporter ATP-binding and permease protein                                          | 726 | 3588582 | 3590372 | 50.98039216 | 51.0862745 | 1.00208 |
| Flavodoxin                                                                                                     | 725 | 3590474 | 3590953 | 121.085595  | 141.808977 | 1.17115 |

|                                                                                                                                                                                      |     |         |         |             |            |         |
|--------------------------------------------------------------------------------------------------------------------------------------------------------------------------------------|-----|---------|---------|-------------|------------|---------|
| amino acid ABC transporter, ATP-binding protein                                                                                                                                      | 724 | 3591057 | 3591812 | 84.76821192 | 60.3900662 | 0.71241 |
| Amino acid ABC transporter, amino acid-binding/permease protein                                                                                                                      | 723 | 3591799 | 3592488 | 75.47169811 | 76.978955  | 1.01997 |
| Amino acid ABC transporter, amino acid-binding/permease protein                                                                                                                      | 722 | 3592509 | 3593330 | 322.7771011 | 369.479903 | 1.14469 |
| S-adenosylhomocysteine deaminase (EC 3.5.4.28); Methylthioadenosine deaminase                                                                                                        | 721 | 3593374 | 3594570 | 56.02006689 | 76.2449833 | 1.36103 |
| Ferredoxin                                                                                                                                                                           | 720 | 3594563 | 3595330 | 67.79661017 | 67.9374185 | 1.00208 |
| creatininase (EC 3.5.2.10)                                                                                                                                                           | 719 | 3595330 | 3596142 | 118.226601  | 121.469212 | 1.02743 |
| Ig domain protein, group 2 domain protein                                                                                                                                            |     | 3596365 | 3598536 | 395.2095808 | 519.468448 | 1.31441 |
| Cell division protein ftsJ / Ribosomal RNA large subunit methyltransferase J (EC 2.1.1.-)                                                                                            | 717 | 3598610 | 3599254 | 97.82608696 | 130.03882  | 1.32929 |
| Octaprenyl-diphosphate synthase (EC 2.5.1.-) / Dimethylallyltransferase (EC 2.5.1.1) / Geranyltranstransferase (EC 2.5.1.10) / Geranylgeranyl pyrophosphate synthetase (EC 2.5.1.29) | 716 | 3599307 | 3600359 | 119.7718631 | 112.332224 | 0.93788 |
| hypothetical protein                                                                                                                                                                 | 715 | 3600370 | 3600966 | 379.1946309 | 346.595638 | 0.91403 |
| Membrane proteins related to metalloendopeptidases                                                                                                                                   | 714 | 3601000 | 3602013 | 187.5616979 | 290.264561 | 1.54757 |
| Cell division protein ftsK                                                                                                                                                           | 713 | 3602036 | 3604147 | 82.89909995 | 55.539081  | 0.66996 |
| hypothetical protein                                                                                                                                                                 | 712 | 3604228 | 3604353 | 0           | 0          | #DIV/0! |
| NADH oxidase H <sub>2</sub> O-forming (EC 1.6.-.-)                                                                                                                                   | 711 | 3604403 | 3605737 | 1413.793103 | 1780.08696 | 1.25909 |
| hypothetical protein                                                                                                                                                                 | 710 | 3605785 | 3606852 | 99.34395501 | 163.949391 | 1.65032 |
| Deblocking aminopeptidase (EC 3.4.11.-)                                                                                                                                              | 709 | 3606861 | 3607937 | 223.9776952 | 370.989312 | 1.65637 |
| creatininase (EC 3.5.2.10)                                                                                                                                                           | 708 | 3607958 | 3608725 | 366.3624511 | 594.452412 | 1.62258 |
| Dipeptide-binding ABC transporter, periplasmic substrate-binding component (TC 3.A.1.5.2)                                                                                            | 707 | 3608782 | 3610314 | 413.8381201 | 802.951044 | 1.94025 |
| Oligopeptide transport ATP-binding protein oppF (TC 3.A.1.5.1)                                                                                                                       | 706 | 3610360 | 3611316 | 142.2594142 | 262.798117 | 1.84732 |
| Oligopeptide transport ATP-binding protein oppD (TC 3.A.1.5.1)                                                                                                                       | 705 | 3611313 | 3612347 | 282.3984526 | 427.454062 | 1.51366 |
| Dipeptide transport system permease protein dppC (TC 3.A.1.5.2)                                                                                                                      | 704 | 3612355 | 3613236 | 196.3677639 | 251.372304 | 1.28011 |
| Dipeptide transport system permease protein dppB (TC 3.A.1.5.2)                                                                                                                      | 703 | 3613233 | 3614195 | 119.5426195 | 92.8565489 | 0.77677 |
| Uracil-DNA glycosylase (EC 3.2.2.-)                                                                                                                                                  | 702 | 3614584 | 3615585 | 28.97102897 | 28.8166833 | 0.99467 |
| Putative DNA-binding protein                                                                                                                                                         | 701 | 3615582 | 3616145 | 10.65719361 | 6.61101243 | 0.62033 |
| Oxidoreductase                                                                                                                                                                       | 700 | 3616142 | 3617185 | 28.76318313 | 56.204698  | 1.95405 |
| Methyl-accepting chemotaxis protein                                                                                                                                                  | 699 | 3617238 | 3619388 | 68.93339544 | 69.7766651 | 1.01223 |
| hypothetical protein                                                                                                                                                                 | 697 | 3619341 | 3619496 | 64.51612903 | 72.0387097 | 1.1166  |
| Signal transduction histidine kinase                                                                                                                                                 | 698 | 3619477 | 3621171 | 104.4864227 | 114.252656 | 1.09347 |
| hypothetical protein                                                                                                                                                                 | 696 | 3621219 | 3622382 | 122.9578676 | 122.413156 | 0.99557 |
| hypothetical protein                                                                                                                                                                 | 694 | 3622768 | 3622908 | 171.4285714 | 352.260714 | 2.05485 |
| hypothetical protein                                                                                                                                                                 | 693 | 3622918 | 3623625 | 274.3988685 | 371.1471   | 1.35258 |
| Deoxyguanosinetriphosphate triphosphohydrolase (EC 3.1.5.1)                                                                                                                          | 692 | 3623640 | 3624923 | 62.35385814 | 50.7677319 | 0.81419 |
| hypothetical protein                                                                                                                                                                 |     | 3625001 | 3625606 | 176.8595041 | 141.497521 | 0.80006 |
| hypothetical protein                                                                                                                                                                 | 690 | 3625618 | 3626850 | 160.7142857 | 200.903409 | 1.25007 |
| hypothetical protein                                                                                                                                                                 | 689 | 3626856 | 3627440 | 246.5753425 | 181.638699 | 0.73665 |



|                                                                                                                        |     |         |         |             |            |         |
|------------------------------------------------------------------------------------------------------------------------|-----|---------|---------|-------------|------------|---------|
| anti-sigma F factor antagonist (spolIIA-2); anti sigma b factor antagonist RsbV                                        | 688 | 3627464 | 3627802 | 109.4674556 | 101.859467 | 0.9305  |
| HPr kinase/phosphorylase (EC 2.7.1.-) (EC 2.7.4.-)                                                                     | 687 | 3627967 | 3628974 | 144.9851043 | 194.970705 | 1.34476 |
| Catabolite repression HPr-like protein Crh                                                                             | 686 | 3628991 | 3629257 | 180.4511278 | 167.909774 | 0.9305  |
| Nitrogen regulation protein ntrY (EC 2.7.3.-)                                                                          | 685 | 3629271 | 3631067 | 93.54120267 | 89.6305679 | 0.95819 |
| Two component signal transduction response regulator                                                                   | 684 | 3631064 | 3632449 | 104.6931408 | 83.3083032 | 0.79574 |
| SOS-response repressor and protease LexA (EC 3.4.21.88)                                                                | 683 | 3632446 | 3633066 | 87.09677419 | 81.0435484 | 0.9305  |
| DNA polymerase III delta subunit (EC 2.7.7.7)                                                                          | 682 | 3633074 | 3634042 | 83.67768595 | 119.196281 | 1.42447 |
| Na <sup>+</sup> /H <sup>+</sup> antiporter                                                                             | 681 | 3634062 | 3636128 | 8.712487899 | 23.4201355 | 2.68811 |
| Purine nucleoside phosphorylase (EC 2.4.2.1)                                                                           | 680 | 3636375 | 3637187 | 8.620689655 | 3.43780788 | 0.39879 |
| Biotin synthase-related enzyme                                                                                         | 679 | 3637291 | 3638487 | 13.37792642 | 4.6680602  | 0.34894 |
| hypothetical protein                                                                                                   |     | 3638532 | 3638645 | 8.849557522 | 0          | 0       |
| Radical SAM domain protein                                                                                             | 677 | 3638678 | 3639934 | 5.573248408 | 3.70421975 | 0.66464 |
| Radical SAM domain protein                                                                                             | 676 | 3640074 | 3641318 | 1.607717042 | 0.74799035 | 0.46525 |
| Oligopeptide transport ATP-binding protein oppF (TC 3.A.1.5.1)                                                         | 675 | 3641340 | 3642317 | 2.047082907 | 1.90481064 | 0.9305  |
| Oligopeptide transport ATP-binding protein oppD (TC 3.A.1.5.1)                                                         | 674 | 3642310 | 3643341 | 0           | 0          | #DIV/0! |
| Dipeptide transport system permease protein dppC (TC 3.A.1.5.2)                                                        | 673 | 3643341 | 3644273 | 2.145922747 | 0.99839056 | 0.46525 |
| Binding-protein-dependent transport systems inner membrane component                                                   | 672 | 3644307 | 3645257 | 1.052631579 | 0.97947368 | 0.9305  |
| ABC transporter peptide-binding protein                                                                                | 671 | 3645321 | 3646907 | 1.891551072 | 0          | 0       |
| COG1092 family predicted tRNA methylase                                                                                | 670 | 3647261 | 3648622 | 102.1307862 | 86.1447465 | 0.84347 |
| Polyphosphate kinase (EC 2.7.4.1)                                                                                      | 669 | 3648628 | 3650829 | 139.7260274 | 96.4490868 | 0.69027 |
| Exopolyphosphatase (EC 3.6.1.11)                                                                                       | 668 | 3650860 | 3652398 | 96.22886866 | 54.4505852 | 0.56584 |
| Trehalase (EC 3.2.1.28)                                                                                                | 667 | 3652402 | 3653826 | 185.8657244 | 186.757597 | 1.0048  |
| hypothetical protein                                                                                                   |     | 3653920 | 3654069 | 100.6711409 | 93.6744966 | 0.9305  |
| Aspartyl-tRNA(Asn) amidotransferase subunit B (EC 6.3.5.-); Glutamyl-tRNA(Gln) amidotransferase subunit B (EC 6.3.5.-) | 665 | 3654073 | 3656622 | 95.33150255 | 137.256964 | 1.43979 |
| Uncharacterized protein TP_1003                                                                                        | 664 | 3656676 | 3657524 | 70.75471698 | 109.728774 | 1.55083 |
| Prolyl-tRNA synthetase (EC 6.1.1.15)                                                                                   | 663 | 3657613 | 3659478 | 253.0831099 | 305.3437   | 1.2065  |
| hypothetical protein                                                                                                   | 662 | 3659510 | 3659800 | 68.96551724 | 35.2948276 | 0.51178 |
| hypothetical protein                                                                                                   | 661 | 3659824 | 3660540 | 32.12290503 | 27.2912011 | 0.84959 |
| Myo-inositol-1(or 4)-monophosphatase (EC 3.1.3.25)                                                                     | 660 | 3660546 | 3661373 | 24.18379686 | 18.0024184 | 0.7444  |
| Spermidine Putrescine transport ATP-binding protein potA (TC_3.A.1.11.1)                                               | 659 | 3661382 | 3662446 | 16.91729323 | 3.4981203  | 0.20678 |
| Ferric iron ABC transporter, permease protein                                                                          | 658 | 3662488 | 3664149 | 9.030704395 | 2.80102348 | 0.31017 |
| Ferric iron ABC transporter, iron-binding protein                                                                      | 657 | 3664210 | 3665265 | 11.37440758 | 7.93791469 | 0.69788 |
| Short chain dehydrogenase                                                                                              | 656 | 3665304 | 3666080 | 37.37113402 | 4.79639175 | 0.12834 |
| Xylulose kinase (EC 2.7.1.17)                                                                                          | 655 | 3666099 | 3667622 | 22.98095863 | 11.6083388 | 0.50513 |
| hypothetical protein                                                                                                   | 654 | 3667715 | 3667828 | 0           | 0          | #DIV/0! |
| Modification methylase PstI (EC 2.1.1.72)                                                                              | 653 | 3667779 | 3668837 | 3.780718336 | 13.192344  | 3.48938 |
| Type II restriction enzyme BsuBI (EC 3.1.21.4)                                                                         | 652 | 3668937 | 3669338 | 0           | 0          | #DIV/0! |
| Ribose operon repressor                                                                                                | 651 | 3669382 | 3670476 | 21.93784278 | 34.8724863 | 1.5896  |
| Outer membrane protein A precursor                                                                                     | 650 | 3670577 | 3671506 | 643.7029064 | 616.994618 | 0.95851 |

|                                                                                           |     |         |         |             |            |         |
|-------------------------------------------------------------------------------------------|-----|---------|---------|-------------|------------|---------|
| Pyruvate kinase (EC 2.7.1.40)                                                             | 649 | 3671619 | 3673412 | 89.23591746 | 92.8943112 | 1.041   |
| Excinuclease ABC subunit B                                                                | 648 | 3673499 | 3675490 | 102.963335  | 118.240331 | 1.14837 |
| hypothetical protein                                                                      | 647 | 3675671 | 3676234 | 948.4902309 | 1216.42629 | 1.28249 |
| hypothetical protein                                                                      | 646 | 3676334 | 3677143 | 80.3461063  | 28.7546354 | 0.35788 |
| hypothetical protein                                                                      | 645 | 3677187 | 3678344 | 36.30077787 | 32.1694036 | 0.88619 |
| hypothetical protein                                                                      | 644 | 3678461 | 3679972 | 26.47253475 | 47.4179351 | 1.79121 |
| TolA protein                                                                              | 643 | 3680035 | 3681294 | 40.50833995 | 37.6930103 | 0.9305  |
| hypothetical protein                                                                      |     | 3681307 | 3681543 | 0           | 0          | #DIV/0! |
| putative histidinol phosphatase and related<br>hydrolases of the PHP family               | 641 | 3681698 | 3682432 | 28.61035422 | 39.2990463 | 1.3736  |
| Chorismate synthase (EC 4.2.3.5)                                                          | 640 | 3682513 | 3683697 | 69.25675676 | 88.8061655 | 1.28227 |
| GTP-binding protein HflX                                                                  | 639 | 3683761 | 3685104 | 102.7550261 | 99.7706627 | 0.97096 |
| ClpB protein                                                                              | 638 | 3685111 | 3687729 | 29.43425076 | 78.2530581 | 2.65857 |
| Arsenical-resistance protein ACR3                                                         | 637 | 3687811 | 3688800 | 12.13346815 | 15.9944388 | 1.31821 |
| radical SAM domain protein                                                                | 636 | 3688904 | 3690136 | 629.0584416 | 937.297484 | 1.49    |
| UDP-glucose:sterol glucosyltransferase                                                    | 635 | 3690133 | 3691356 | 285.3638594 | 493.781276 | 1.73036 |
| UDP-glucose:sterol glucosyltransferase                                                    | 633 | 3691369 | 3692631 | 288.4310618 | 482.208399 | 1.67183 |
| Aspartate aminotransferase (EC 2.6.1.1)                                                   | 634 | 3692603 | 3693778 | 62.12765957 | 65.7289362 | 1.05797 |
| Iron-sulfur cluster regulator IscR                                                        | 632 | 3693797 | 3694231 | 119.8156682 | 68.6082949 | 0.57262 |
| Iron-sulfur cluster regulator IscR                                                        | 631 | 3694228 | 3694662 | 71.42857143 | 72.8963134 | 1.02055 |
| Cystathionine gamma-synthase (EC 2.5.1.48)                                                | 630 | 3694813 | 3696045 | 86.03896104 | 94.4094968 | 1.09729 |
| Cystathionine beta-lyase (EC 4.4.1.8)                                                     | 629 | 3696055 | 3697200 | 200         | 203.978603 | 1.01989 |
| hypothetical protein                                                                      |     | 3697390 | 3697782 | 86.73469388 | 144.797194 | 1.66943 |
| Ferrous iron transport protein B                                                          | 627 | 3697769 | 3699934 | 76.35009311 | 110.464385 | 1.44681 |
| hypothetical protein                                                                      | 626 | 3700288 | 3701397 | 9.017132552 | 5.87330929 | 0.65135 |
| ADP-ribose pyrophosphatase (EC 3.6.1.13)                                                  | 625 | 3701398 | 3701871 | 8.456659619 | 19.6723044 | 2.32625 |
| hypothetical protein                                                                      | 624 | 3701959 | 3702798 | 35.7568534  | 18.8539928 | 0.52728 |
| hypothetical protein                                                                      | 623 | 3702811 | 3703653 | 15.43942993 | 4.42042755 | 0.28631 |
| phage tail assembly-like protein                                                          | 622 | 3703664 | 3704242 | 6.920415225 | 3.21972318 | 0.46525 |
| Transcriptional regulator, DeoR family                                                    | 621 | 3704358 | 3705389 | 5.819592629 | 3.61008729 | 0.62033 |
| hypothetical protein                                                                      |     | 3705357 | 3705491 | 0           | 0          | #DIV/0! |
| hypothetical protein                                                                      | 618 | 3705845 | 3706693 | 0           | 0          | #DIV/0! |
| putative lipoprotein                                                                      | 617 | 3706705 | 3708108 | 4.989308624 | 2.65288667 | 0.53171 |
|                                                                                           |     |         |         |             |            |         |
| sensory box histidine kinase/response regulator                                           | 616 | 3708286 | 3710994 | 40.25110783 | 51.5417282 | 1.2805  |
| Signal recognition particle, subunit Ffh SRP54<br>(TC 3.A.5.1.1)                          | 615 | 3711025 | 3712401 | 122.0930233 | 111.578852 | 0.91388 |
| Glycerol-3-phosphate dehydrogenase [NAD(P)+]<br>(EC 1.1.1.94)                             | 614 | 3712405 | 3713472 | 151.8275539 | 167.437676 | 1.10281 |
| Oligoendopeptidase F                                                                      | 613 | 3713564 | 3715447 | 152.4163569 | 147.753319 | 0.96941 |
| Nucleoside diphosphate kinase (EC 2.7.4.6)                                                | 612 | 3715431 | 3715874 | 178.3295711 | 197.442438 | 1.10718 |
| Fe-S OXIDOREDUCTASE (1.8.-.-)                                                             | 611 | 3715934 | 3717775 | 41.281912   | 77.3310701 | 1.87324 |
| Thioredoxin-like proteins and domains                                                     | 610 | 3717765 | 3717989 | 549.1071429 | 942.962054 | 1.71726 |
|                                                                                           |     |         |         |             |            |         |
| Pyrophosphate--fructose 6-phosphate 1-<br>phosphotransferase, alpha subunit (EC 2.7.1.90) | 608 | 3718180 | 3719538 | 231.9587629 | 267.227541 | 1.15205 |
| hypothetical protein                                                                      | 609 | 3719535 | 3720398 | 63.73117034 | 69.0057937 | 1.08276 |
| hypothetical tRNA/rRNA methyltransferase yfiF<br>[EC:2.1.1.-]                             | 607 | 3720400 | 3721176 | 104.3814433 | 122.30799  | 1.17174 |
| VapC toxin protein                                                                        | 606 | 3721205 | 3721600 | 30.37974684 | 9.42278481 | 0.31017 |
| Virulence associated protein B                                                            | 605 | 3721600 | 3721875 | 105.4545455 | 37.22      | 0.35295 |

|                                                                                                                                                    |     |         |         |             |            |         |
|----------------------------------------------------------------------------------------------------------------------------------------------------|-----|---------|---------|-------------|------------|---------|
| Endonuclease/exonuclease/phosphatase family protein                                                                                                | 604 | 3722016 | 3723242 | 10.60358891 | 6.07177814 | 0.57262 |
| Cytidylate kinase (EC 2.7.4.14)                                                                                                                    | 603 | 3723335 | 3724156 | 388.5505481 | 372.880024 | 0.95967 |
| ADP-ribose pyrophosphatase (EC 3.6.1.13)                                                                                                           | 601 | 3724282 | 3724866 | 97.60273973 | 146.585616 | 1.50186 |
| Treponemal membrane protein B precursor (Antigen tmpB)                                                                                             | 602 | 3724848 | 3725576 | 348.9010989 | 217.287088 | 0.62278 |
| Treponemal membrane protein A precursor (Antigen tmpA) (Membrane protein A)                                                                        | 600 | 3725573 | 3726742 | 319.9315654 | 238.793841 | 0.74639 |
| bacterial seryl-tRNA synthetase related                                                                                                            | 599 | 3726911 | 3727141 | 86.95652174 | 121.369565 | 1.39575 |
| Ribonuclease HI (EC 3.1.26.4)                                                                                                                      | 598 | 3727145 | 3727591 | 210.7623318 | 233.668161 | 1.10868 |
| Oxidoreductase                                                                                                                                     | 597 | 3727635 | 3728633 | 143.2865731 | 160.366733 | 1.1192  |
| Heat shock protein 60 family chaperone GroEL                                                                                                       | 596 | 3728822 | 3730468 | 1335.423197 | 3105.94483 | 2.32581 |
| Transcriptional regulator, GntR family                                                                                                             | 595 | 3730643 | 3731392 | 42.72363151 | 42.2389853 | 0.98866 |
| TRAP-type C4-dicarboxylate transport system, periplasmic component                                                                                 | 594 | 3731498 | 3732508 | 76.84630739 | 103.079341 | 1.34137 |
| TRAP-type transport system, small permease component, predicted N-acetylneuraminate transporter                                                    | 593 | 3732591 | 3733097 | 19.76284585 | 25.7450593 | 1.3027  |
| TRAP-type C4-dicarboxylate transport system, large permease component                                                                              | 592 | 3733108 | 3734403 | 37.83783784 | 33.7710425 | 0.89252 |
| Mannonate dehydratase (EC 4.2.1.8)                                                                                                                 | 591 | 3734424 | 3735491 | 27.17900656 | 51.4522024 | 1.89309 |
| D-mannonate oxidoreductase (EC 1.1.1.57)                                                                                                           | 590 | 3735516 | 3737141 | 35.07692308 | 24.6224615 | 0.70196 |
| Uronate isomerase (EC 5.3.1.12)                                                                                                                    | 589 | 3737155 | 3738627 | 30.57065217 | 30.9745245 | 1.01321 |
| 4-Hydroxy-2-oxoglutarate aldolase (EC 4.1.3.16) / 2-dehydro-3-deoxyphosphogluconate aldolase (EC 4.1.2.14)                                         | 588 | 3738611 | 3739591 | 48.97959184 | 42.7270408 | 0.87234 |
| 2-dehydro-3-deoxygluconate kinase (EC 2.7.1.45)                                                                                                    | 587 | 3739737 | 3740759 | 67.5146771  | 47.3444227 | 0.70125 |
| Heavy-metal-associated domain (N-terminus) and membrane-bounded cytochrome biogenesis cycZ-like domain, possible membrane copper tolerance protein | 586 | 3740836 | 3741630 | 20.1511335  | 10.5472292 | 0.52341 |
| hypothetical protein                                                                                                                               | 585 | 3741657 | 3742364 | 32.53182461 | 19.741867  | 0.60685 |
| Copper-translocating P-type ATPase (EC 3.6.3.4)                                                                                                    | 584 | 3742384 | 3744840 | 48.45276873 | 54.5570033 | 1.12598 |
| Copper chaperone                                                                                                                                   | 583 | 3744866 | 3745066 | 385         | 428.03     | 1.11177 |
| Two-component response regulator SA14-24                                                                                                           | 582 | 3745063 | 3745791 | 170.3296703 | 177.664148 | 1.04306 |
| two-component sensor histidine kinase                                                                                                              | 581 | 3745788 | 3747194 | 61.87766714 | 53.60633   | 0.86633 |
| hypothetical protein                                                                                                                               | 580 | 3747212 | 3747877 | 6.015037594 | 12.5932331 | 2.09363 |
| hypothetical protein                                                                                                                               | 579 | 3747897 | 3749174 | 0           | 1.45732185 | #DIV/0! |
| hypothetical protein                                                                                                                               | 578 | 3749177 | 3749725 | 0           | 3.3959854  | #DIV/0! |
| Large exoproteins involved in heme utilization or adhesion                                                                                         | 577 | 3749739 | 3751307 | 1.275510204 | 2.96715561 | 2.32625 |
| Bacterial regulatory proteins, AsnC family                                                                                                         | 576 | 3751484 | 3751720 | 0           | 0          | #DIV/0! |
| Putative preQ0 transporter                                                                                                                         | 574 | 3751806 | 3752531 | 24.82758621 | 19.2517241 | 0.77542 |
| hypothetical protein                                                                                                                               | 575 | 3752528 | 3753235 | 45.26166902 | 36.8514851 | 0.81419 |
| Dinucleotide-utilizing enzyme involved in molybdopterin and thiamine biosynthesis family 1                                                         | 573 | 3753212 | 3754069 | 51.34189032 | 56.4597433 | 1.09968 |
| tRNA(Cytosine32)-2-thiocytidine synthetase                                                                                                         | 572 | 3754062 | 3754808 | 21.44772118 | 26.1936997 | 1.22128 |
| hypothetical protein                                                                                                                               | 571 | 3754840 | 3755685 | 153.8461538 | 203.718935 | 1.32417 |

|                                                                                         |     |         |         |             |            |         |
|-----------------------------------------------------------------------------------------|-----|---------|---------|-------------|------------|---------|
| ABC transporter, periplasmic spermidine putrescine-binding protein potD (TC_3.A.1.11.1) | 570 | 3755719 | 3756759 | 336.5384615 | 807.924519 | 2.40069 |
| Spermidine Putrescine ABC transporter permease component potC (TC_3.A.1.11.1)           | 569 | 3756829 | 3757695 | 20.7852194  | 49.426097  | 2.37794 |
| Spermidine Putrescine ABC transporter permease component potB (TC_3.A.1.11.1)           | 568 | 3757692 | 3758525 | 26.41056423 | 78.1932773 | 2.96068 |
| Spermidine Putrescine transport ATP-binding protein potA (TC_3.A.1.11.1)                | 567 | 3758573 | 3759751 | 176.3202726 | 268.687819 | 1.52386 |
| Lysine 2,3-aminomutase (EC 5.4.3.2)                                                     | 566 | 3759958 | 3761019 | 32.98774741 | 76.299246  | 2.31296 |
| transcriptional regulator (AraC/XylS family) hypothetical protein                       | 565 | 3761177 | 3762130 | 15.73976915 | 15.6222455 | 0.99253 |
| hypothetical protein                                                                    |     | 3762186 | 3762326 | 14.28571429 | 0          | 0       |
| hypothetical protein                                                                    | 563 | 3762340 | 3762726 | 0           | 9.64248705 | #DIV/0! |
| Galactoside O-acetyltransferase (EC 2.3.1.18)                                           | 562 | 3762728 | 3763336 | 6.578947368 | 6.12171053 | 0.9305  |
| Acetylornithine deacetylase (EC 3.5.1.16)                                               | 561 | 3763474 | 3764733 | 149.324861  | 184.03058  | 1.23242 |
| UDP-glucose 4-epimerase (EC 5.1.3.2)                                                    | 560 | 3764770 | 3765741 | 128.7332647 | 154.284758 | 1.19848 |
| internalin-like protein (LPXTG motif)                                                   | 559 | 3765949 | 3767010 | 61.26295947 | 42.9731385 | 0.70145 |
| N-Acetylneuraminatase cytidylyltransferase (EC 2.7.7.43)                                | 558 | 3767280 | 3768047 | 15.64537158 | 10.9185137 | 0.69788 |
| hypothetical protein                                                                    | 557 | 3768338 | 3768670 | 57.22891566 | 72.8704819 | 1.27332 |
| COG0488: ATPase components of ABC transporters with duplicated ATPase domains           | 556 | 3768778 | 3770886 | 145.1612903 | 139.928131 | 0.96395 |
| Uncharacterized protein TP_0260                                                         |     | 3770893 | 3772287 | 177.1879484 | 179.558465 | 1.01338 |
| hypothetical protein                                                                    |     | 3772441 | 3773052 | 353.5188216 | 400.526187 | 1.13297 |
| Glutaminyl-tRNA synthetase (EC 6.1.1.18)                                                | 553 | 3773232 | 3774950 | 185.3146853 | 182.738054 | 0.9861  |
| Tributyryl esterase                                                                     | 552 | 3774960 | 3775745 | 192.3566879 | 148.16879  | 0.77028 |
| Ferredoxin                                                                              | 551 | 3775814 | 3776944 | 494.6902655 | 551.712389 | 1.11527 |
| Outer membrane protein                                                                  | 550 | 3776988 | 3778388 | 70.71428571 | 93.7146429 | 1.32526 |
| Probable Co/Zn/Cd efflux system membrane fusion protein                                 | 549 | 3778435 | 3779532 | 71.1030082  | 96.6973564 | 1.35996 |
| RND multidrug efflux transporter; Acriflavin resistance protein                         | 547 | 3779529 | 3782648 | 42.32125681 | 52.5065726 | 1.24067 |
| Outer membrane vitamin B12 receptor BtuB                                                | 548 | 3782645 | 3784615 | 24.36548223 | 13.6977157 | 0.56218 |
| Cobalamin synthase                                                                      | 546 | 3784647 | 3785495 | 58.96226415 | 31.8213443 | 0.53969 |
| Nicotinate-nucleotide--dimethylbenzimidazole phosphoribosyltransferase (EC 2.4.2.21)    | 545 | 3785492 | 3786538 | 326.0038241 | 225.953155 | 0.6931  |
| hypothetical protein                                                                    | 544 | 3786540 | 3787355 | 77.3006135  | 42.2435583 | 0.54648 |
| Adenosylcobinamide-phosphate guanylyltransferase (EC 2.7.7.62)                          | 543 | 3787352 | 3787882 | 126.4150943 | 61.4481132 | 0.48608 |
| Nitrogenase vanadium-cofactor synthesis protein VnfN                                    | 542 | 3787896 | 3789197 | 98.38585703 | 58.6479631 | 0.5961  |
| Nitrogenase iron protein (EC 1.18.6.1)                                                  | 541 | 3789166 | 3791367 | 112.2217174 | 54.5363471 | 0.48597 |
| Vitamin B12 ABC transporter, ATPase component BtuD                                      | 540 | 3791360 | 3792169 | 129.789864  | 93.1650185 | 0.71781 |
| Vitamin B12 ABC transporter, permease component BtuC                                    | 539 | 3792179 | 3793192 | 110.5626851 | 63.3805528 | 0.57325 |
| Vitamin B12 ABC transporter, B12-binding component BtuF                                 | 538 | 3793179 | 3794081 | 95.34368071 | 49.5166297 | 0.51935 |
| Outer membrane vitamin B12 receptor BtuB                                                | 537 | 3794074 | 3796101 | 192.4025654 | 86.301924  | 0.44855 |
| hypothetical protein                                                                    | 536 | 3796129 | 3796686 | 879.7127469 | 292.347397 | 0.33232 |
| hypothetical protein                                                                    |     | 3796685 | 3796810 | 328         | 89.328     | 0.27234 |
| Cobalamin synthase                                                                      | 534 | 3797135 | 3798589 | 54.33287483 | 77.4350069 | 1.4252  |

|                                                                                                                                  |     |         |         |             |            |         |
|----------------------------------------------------------------------------------------------------------------------------------|-----|---------|---------|-------------|------------|---------|
| Vitamin B12 ABC transporter, ATPase component BtuD                                                                               | 533 | 3798679 | 3799491 | 48.02955665 | 34.3780788 | 0.71577 |
| Vitamin B12 ABC transporter, permease component BtuC                                                                             | 532 | 3799488 | 3800570 | 51.75600739 | 20.6395564 | 0.39879 |
| Cobalt-precorrin-8x methylmutase (EC 5.4.1.2)                                                                                    | 531 | 3800567 | 3801205 | 235.1097179 | 51.0462382 | 0.21712 |
| Cob(I)alamin adenosyltransferase (EC 2.5.1.17)                                                                                   | 530 | 3801205 | 3801708 | 105.3677932 | 33.2982107 | 0.31602 |
| Cobyric acid synthase                                                                                                            | 529 | 3801705 | 3803180 | 109.1525424 | 54.2528814 | 0.49704 |
| L-threonine 3-O-phosphate decarboxylase (EC 4.1.1.81)                                                                            | 528 | 3803164 | 3804219 | 60.66350711 | 22.049763  | 0.36348 |
| Adenosylcobinamide-phosphate synthase                                                                                            | 527 | 3804180 | 3805169 | 45.50050556 | 11.2901921 | 0.24813 |
| Cobyric acid A,C-diamide synthase                                                                                                | 526 | 3805166 | 3806659 | 97.11989283 | 24.9296718 | 0.25669 |
| Cobalt-precorrin-6y C5-methyltransferase (EC 2.1.1.-) / Cobalt-precorrin-6y C15-methyltransferase [decarboxylating] (EC 2.1.1.-) | 525 | 3806656 | 3807915 | 76.25099285 | 25.8677522 | 0.33924 |
| Cobalt-precorrin-6x reductase (EC 1.3.1.54)                                                                                      |     | 3807912 | 3808658 | 95.17426273 | 24.9463807 | 0.26211 |
| Cobalt-precorrin-3b C17-methyltransferase                                                                                        | 523 | 3808651 | 3809382 | 80.71135431 | 26.7311902 | 0.33119 |
| Cobalamin biosynthesis protein CbiG                                                                                              | 522 | 3809375 | 3810166 | 99.87357775 | 15.2926675 | 0.15312 |
| Cobalt-precorrin-4 C11-methyltransferase (EC 2.1.1.133)                                                                          | 521 | 3810163 | 3810915 | 98.40425532 | 19.7978723 | 0.20119 |
| Cobalt-precorrin-6 synthase, anaerobic                                                                                           | 520 | 3810912 | 3812117 | 131.120332  | 28.5713693 | 0.2179  |
| Ferric siderophore transport system, periplasmic binding protein TonB                                                            | 519 | 3812121 | 3812810 | 136.4296081 | 33.7626996 | 0.24747 |
| TonB-dependent receptor; Outer membrane receptor for ferrienterochelin and colicins                                              | 518 | 3812807 | 3814774 | 82.86731063 | 22.2336045 | 0.2683  |
| hypothetical protein                                                                                                             |     | 3814928 | 3815041 | 44.24778761 | 49.4070796 | 1.1166  |
| Sirohydrochlorin cobaltochelate CbiK (EC 4.99.1.3)                                                                               | 516 | 3815334 | 3816242 | 286.3436123 | 75.8337004 | 0.26483 |
| Vitamin B12 ABC transporter, B12-binding component BtuF                                                                          | 515 | 3816239 | 3817198 | 46.92387904 | 14.5542231 | 0.31017 |
| Uroporphyrinogen-III decarboxylase                                                                                               | 514 | 3817849 | 3818976 | 106.4773736 | 51.1898846 | 0.48076 |
| NAD-dependent protein deacetylase of SIR2 family                                                                                 | 513 | 3819053 | 3819937 | 23.75565611 | 21.0520362 | 0.88619 |
| DNA integration/recombination/inversion protein                                                                                  | 512 | 3819927 | 3820472 | 55.04587156 | 34.146789  | 0.62033 |
| Ribonucleotide reductase of class III (anaerobic), activating protein (EC 1.97.1.4)                                              | 511 | 3820568 | 3821197 | 55.64387917 | 69.5286169 | 1.24953 |
| Ribonucleotide reductase of class III (anaerobic), large subunit (EC 1.17.4.2)                                                   | 510 | 3821172 | 3823499 | 168.8869789 | 176.343146 | 1.04415 |
| hypothetical protein                                                                                                             | 509 | 3823691 | 3824722 | 55.28612997 | 49.6387003 | 0.89785 |
| hypothetical protein                                                                                                             | 508 | 3824729 | 3826816 | 206.9956876 | 207.768567 | 1.00373 |
| LSU ribosomal protein L34p                                                                                                       | 506 | 3827190 | 3827345 | 464.516129  | 456.245161 | 0.98219 |
| Ribonuclease P protein component (EC 3.1.26.5)                                                                                   | 505 | 3827369 | 3827773 | 544.5544554 | 472.159653 | 0.86706 |
| YidD                                                                                                                             | 504 | 3827773 | 3827991 | 743.1192661 | 798.181193 | 1.0741  |
| Oxal/YidC membrane insertion protein                                                                                             | 503 | 3828031 | 3829833 | 265.2608213 | 285.036626 | 1.07455 |
| Jag protein                                                                                                                      | 502 | 3829894 | 3830634 | 260.8108108 | 267.833108 | 1.02692 |
| hypothetical protein                                                                                                             | 501 | 3830809 | 3832380 | 77.65754297 | 78.7756206 | 1.0144  |
| hypothetical protein                                                                                                             |     | 3832735 | 3832950 | 153.4883721 | 216.395349 | 1.40985 |
| Putative RNA 2'-O-ribose methyltransferase mtfA (EC 2.1.1.-)                                                                     | 499 | 3832925 | 3833911 | 42.59634888 | 60.3975659 | 1.4179  |



|                                                                                                           |     |         |         |             |            |         |
|-----------------------------------------------------------------------------------------------------------|-----|---------|---------|-------------|------------|---------|
| Methyltransferase (EC 2.1.1.-); N6-adenine-specific DNA methylase                                         | 498 | 3833951 | 3835174 | 94.84873262 | 120.972608 | 1.27543 |
| Fatty acid degradation regulator YsiA, TetR family hypothetical protein                                   | 497 | 3835197 | 3835793 | 117.4496644 | 115.531879 | 0.98367 |
| methyl-accepting chemotaxis protein                                                                       | 496 | 3835964 | 3836737 | 107.373868  | 131.208926 | 1.22198 |
| Methyl-accepting chemotaxis protein                                                                       | 495 | 3836808 | 3838976 | 5.073800738 | 3.43357934 | 0.67673 |
| Methyl-accepting chemotaxis protein                                                                       | 494 | 3839225 | 3841393 | 747.2324723 | 730.494004 | 0.9776  |
| Methyl-accepting chemotaxis protein                                                                       | 493 | 3841427 | 3843610 | 486.2258953 | 392.621442 | 0.80749 |
| Putative transport protein                                                                                | 492 | 3843792 | 3844985 | 35.20536463 | 35.8784577 | 1.01912 |
| Sua5 YciO YrdC YwIC family protein                                                                        | 491 | 3845071 | 3846159 | 51.47058824 | 88.089614  | 1.71146 |
| Magnesium and cobalt transport protein CorA                                                               | 490 | 3846170 | 3847243 | 130.4753029 | 115.336906 | 0.88398 |
| PTS system, fructose-specific IIA component (EC 2.7.1.69)                                                 | 489 | 3847339 | 3847791 | 836.2831858 | 494.070796 | 0.59079 |
| hypothetical protein                                                                                      | 488 | 3847892 | 3849109 | 798.6852917 | 872.391537 | 1.09228 |
| hypothetical protein                                                                                      | 487 | 3849138 | 3849962 | 1728.15534  | 1722.10255 | 0.9965  |
| hypothetical protein                                                                                      | 485 | 3850095 | 3851981 | 49.84093319 | 51.8040827 | 1.03939 |
| Soluble lytic murein transglycosylase and related regulatory proteins (some contain LysM/invasin domains) | 486 | 3851945 | 3852673 | 57.69230769 | 85.6366758 | 1.48437 |
| Sua5 YciO YrdC YwIC family protein                                                                        | 484 | 3852824 | 3853507 | 96.63250366 | 140.324305 | 1.45214 |
| Phenylalanyl-tRNA synthetase beta chain (EC 6.1.1.20)                                                     | 483 | 3853525 | 3855282 | 396.1297666 | 407.259249 | 1.0281  |
| hypothetical protein                                                                                      | 482 | 3855376 | 3855495 | 50.42016807 | 31.2773109 | 0.62033 |
| hypothetical protein                                                                                      |     | 3855453 | 3855569 | 17.24137931 | 8.02155172 | 0.46525 |
| Dipeptide-binding ABC transporter, periplasmic substrate-binding component (TC 3.A.1.5.2)                 | 480 | 3855803 | 3857287 | 173.8544474 | 149.231132 | 0.85837 |
| Dipeptide transport system permease protein dppB (TC 3.A.1.5.2)                                           | 479 | 3857304 | 3858221 | 25.08178844 | 36.5299891 | 1.45643 |
| Dipeptide transport system permease protein dppC (TC 3.A.1.5.2)                                           | 478 | 3858223 | 3859062 | 27.4135876  | 33.2717521 | 1.2137  |
| Oligopeptide transport ATP-binding protein oppD (TC 3.A.1.5.1)                                            | 477 | 3859074 | 3860072 | 30.06012024 | 20.512024  | 0.68237 |
| Oligopeptide transport ATP-binding protein oppF (TC 3.A.1.5.1)                                            | 476 | 3860069 | 3860899 | 30.12048193 | 31.3903614 | 1.04216 |
| hypothetical protein                                                                                      | 475 | 3860892 | 3861875 | 22.38046796 | 10.4125127 | 0.46525 |
| Conserved domain protein                                                                                  | 474 | 3861899 | 3862948 | 78.16968541 | 56.7702574 | 0.72624 |
| Xaa-Pro dipeptidase (EC 3.4.13.9)                                                                         | 473 | 3862966 | 3864156 | 57.14285714 | 34.405042  | 0.60209 |
| Anaerobic dimethyl sulfoxide reductase chain A (EC 1.8.99.-)                                              | 472 | 3864168 | 3867005 | 28.55128657 | 41.3264011 | 1.44744 |
| Glucosamine-6-phosphate deaminase (EC 3.5.99.6)                                                           | 471 | 3867157 | 3867873 | 19.55307263 | 5.19832402 | 0.26586 |
| Beta-glucosidase (EC 3.2.1.21); 6-phospho-beta-glucosidase (EC 3.2.1.86)                                  | 470 | 3867885 | 3869324 | 11.81375956 | 8.40618485 | 0.71156 |
| Protein tyrosine/serine phosphatase                                                                       | 469 | 3869350 | 3870189 | 10.72705602 | 12.1996424 | 1.13728 |
| PTS system, cellobiose-specific IIC component (EC 2.7.1.69)                                               | 468 | 3870191 | 3871429 | 10.50080775 | 14.2806947 | 1.35996 |
| PTS system, cellobiose-specific IIB component (EC 2.7.1.69)                                               | 467 | 3871453 | 3871749 | 23.64864865 | 12.5743243 | 0.53171 |
| PTS system, cellobiose-specific IIA component (EC 2.7.1.69)                                               | 466 | 3871746 | 3872075 | 48.63221884 | 31.1109422 | 0.63972 |
| NtrC family Transcriptional regulator, ATPase domain                                                      | 465 | 3872251 | 3875004 | 20.3414457  | 23.3216491 | 1.14651 |

|                                                                                               |     |         |         |             |            |         |
|-----------------------------------------------------------------------------------------------|-----|---------|---------|-------------|------------|---------|
| Catabolite repression HPr-like protein Crh                                                    | 464 | 3875067 | 3875333 | 22.55639098 | 13.9924812 | 0.62033 |
| Phosphoenolpyruvate-protein phosphotransferase of PTS system (EC 2.7.3.9)                     | 463 | 3875335 | 3876948 | 26.6584005  | 25.9593924 | 0.97378 |
| N-Acetylneuraminate cytidyltransferase (EC 2.7.7.43)                                          | 462 | 3877077 | 3877883 | 11.1662531  | 8.08126551 | 0.72372 |
| D-serine dehydratase (EC 4.3.1.18)                                                            | 461 | 3878007 | 3879362 | 127.6752768 | 159.318081 | 1.24784 |
| Phenylalanyl-tRNA synthetase alpha chain (EC 6.1.1.20)                                        | 460 | 3879405 | 3881126 | 185.3146853 | 215.815268 | 1.16459 |
| Uncharacterized protein TP_0983 precursor                                                     | 459 | 3881265 | 3881951 | 24.78134111 | 52.9001458 | 2.13468 |
| hypothetical protein                                                                          | 458 | 3882029 | 3882406 | 0           | 0          | #DIV/0! |
| hypothetical protein                                                                          | 457 | 3882409 | 3882678 | 0           | 0          | #DIV/0! |
| Tryptophan synthase beta chain like (EC 4.2.1.20)                                             | 456 | 3882792 | 3884171 | 151.5591008 | 624.156998 | 4.11824 |
| Rhomboid family protein                                                                       | 455 | 3884256 | 3884885 | 39.74562798 | 44.3799682 | 1.1166  |
| diguanylate cyclase (GGDEF domain) with PAS/PAC sensor                                        | 454 | 3884898 | 3885956 | 120.9829868 | 100.261815 | 0.82873 |
| tRNA dihydrouridine synthase B (EC 1.-.-.-)                                                   | 453 | 3886021 | 3886998 | 65.50665302 | 65.7159672 | 1.0032  |
| Putative deoxyribonuclease YcfH                                                               | 452 | 3886999 | 3887835 | 228.4688995 | 183.651316 | 0.80384 |
| fructose response regulator of fruA and EII fructose/mannose                                  | 451 | 3888013 | 3888687 | 194.3620178 | 154.623145 | 0.79554 |
| Probable peptidyl-prolyl cis-trans isomerase                                                  | 450 | 3888700 | 3889770 | 594.3925234 | 692.22243  | 1.16459 |
| Recombination protein RecR                                                                    | 449 | 3889824 | 3890435 | 96.56301146 | 109.649755 | 1.13553 |
| conserved protein of unknown function likely to be involved in DNA repair                     | 448 | 3890432 | 3890797 | 369.8630137 | 356.90411  | 0.96496 |
| DNA polymerase III subunits gamma and tau (EC 2.7.7.7)                                        | 447 | 3890787 | 3892751 | 220.4439855 | 203.681982 | 0.92396 |
| hypothetical protein                                                                          | 446 | 3893537 | 3895129 | 1380.653266 | 1160.20258 | 0.84033 |
| carboxylesterase type B                                                                       |     | 3895004 | 3895147 | 468.5314685 | 188.702797 | 0.40275 |
| Branched-chain amino acid ABC transporter, amino acid-binding protein (TC 3.A.1.4.1)          | 444 | 3895282 | 3896496 | 51.0708402  | 57.4855848 | 1.1256  |
| Branched-chain amino acid transport system permease protein livM (TC 3.A.1.4.1)               | 443 | 3896493 | 3897401 | 23.1277533  | 14.3469163 | 0.62033 |
| High-affinity branched-chain amino acid transport system permease protein LivH (TC 3.A.1.4.1) | 442 | 3897410 | 3898339 | 24.75780409 | 35.0565124 | 1.41598 |
| Branched-chain amino acid transport ATP-binding protein livF (TC 3.A.1.4.1)                   | 441 | 3898341 | 3899060 | 34.7705146  | 16.8240612 | 0.48386 |
| Branched-chain amino acid transport ATP-binding protein livG (TC 3.A.1.4.1)                   | 440 | 3899044 | 3899769 | 51.03448276 | 97.542069  | 1.9113  |
| PilT protein, N-terminal                                                                      | 439 | 3899878 | 3900276 | 12.56281407 | 11.6896985 | 0.9305  |
| hypothetical protein                                                                          | 438 | 3900273 | 3900569 | 60.81081081 | 12.5743243 | 0.20678 |
| Nitroreductase family protein                                                                 | 437 | 3900639 | 3901172 | 15.00938086 | 36.6613508 | 2.44256 |
| Branched-chain amino acid transport ATP-binding protein livF (TC 3.A.1.4.1)                   | 436 | 3901281 | 3902021 | 39.18918919 | 75.4459459 | 1.92517 |
| Branched-chain amino acid transport ATP-binding protein livG (TC 3.A.1.4.1)                   | 435 | 3902047 | 3902817 | 31.16883117 | 90.6331169 | 2.90781 |
| Branched-chain amino acid transport system permease protein livM (TC 3.A.1.4.1)               | 434 | 3902795 | 3903868 | 56.95611578 | 96.4383754 | 1.6932  |
| High-affinity branched-chain amino acid transport system permease protein LivH (TC 3.A.1.4.1) | 433 | 3903878 | 3904789 | 31.3549832  | 62.5195969 | 1.99393 |

|                                                                                                           |     |                                    |                  |                 |                    |
|-----------------------------------------------------------------------------------------------------------|-----|------------------------------------|------------------|-----------------|--------------------|
| Branched-chain amino acid ABC transporter, amino acid-binding protein (TC 3.A.1.4.1) hypothetical protein | 432 | 3904910 3906109<br>3906199 3906342 | 236.030025<br>0  | 516.858215<br>0 | 2.1898<br>#DIV/0!  |
| Pyrimidine ABC transporter, ATP-binding protein                                                           | 430 | 3906393 3907196                    | 4.98132005       | 12.7465753      | 2.55888            |
| Hydroxymethylpyrimidine ABC transporter, transmembrane component                                          | 429 | 3907197 3908051                    | 2.341920375      | 9.80620609      | 4.18725            |
| Pyrimidine ABC transporter, transmembrane component 2                                                     | 428 | 3908048 3908836                    | 1.269035533      | 3.54251269      | 2.7915             |
| Pyrimidine ABC transporter, substrate-binding component                                                   | 427 | 3908904 3909986                    | 26.80221811      | 69.6585028      | 2.59898            |
| Dihydropyrimidinase (EC 3.5.2.2)                                                                          | 426 | 3910056 3911432                    | 18.16860465      | 37.1929506      | 2.0471             |
| Dihydropyrimidine dehydrogenase homolog                                                                   | 425 | 3911434 3912936                    | 9.320905459      | 18.5852197      | 1.99393            |
| Beta-ureidopropionase (EC 3.5.1.6)                                                                        | 424 | 3912947 3914170                    | 92.39574816      | 116.407604      | 1.25988            |
| Aminotransferase class-III                                                                                | 423 | 3914189 3915511                    | 82.45083207      | 153.440998      | 1.861              |
| Alcohol dehydrogenase (EC 1.1.1.1)                                                                        | 422 | 3915533 3916645                    | 192.4460432      | 244.339928      | 1.26965            |
| Threonine synthase (EC 4.2.3.1)                                                                           | 421 | 3916669 3918033                    | 233.1378299      | 343.821114      | 1.47475            |
| PAP2 family protein hypothetical protein                                                                  | 419 | 3918046 3918837<br>3918834 3918953 | 68.26801517<br>0 | 27.0562579<br>0 | 0.39632<br>#DIV/0! |
| serine/threonine kinase                                                                                   | 418 | 3918847 3919647                    | 57.5             | 63.971875       | 1.11255            |
| putative NADH-dependent flavin oxidoreductase                                                             | 417 | 3919790 3920758                    | 71.65109034      | 60.8738318      | 0.84959            |
| putative membrane protein                                                                                 |     | 3920807 3921250                    | 38.37471783      | 16.8036117      | 0.43788            |
| hypothetical protein                                                                                      | 415 | 3921264 3921494                    | 0                | 0               | #DIV/0!            |
| Conserved protein                                                                                         | 414 | 3921484 3921963                    | 10.43841336      | 17.4832985      | 1.6749             |
| hypothetical protein                                                                                      | 413 | 3921960 3922103                    | 6.993006993      | 13.013986       | 1.861              |
| hypothetical protein                                                                                      | 412 | 3922225 3925368                    | 3.818008272      | 3.25660197      | 0.85296            |
| DNA or RNA helicase of superfamily II                                                                     | 411 | 3925412 3929110                    | 33.80205516      | 25.4138724      | 0.75184            |
| ATP-dependent helicase                                                                                    | 410 | 3929114 3932410                    | 40.65533981      | 39.523665       | 0.97216            |
| SEC-C motif domain protein                                                                                | 409 | 3932529 3933041                    | 261.71875        | 287.146484      | 1.09716            |
| Myo-inositol 2-dehydrogenase (EC 1.1.1.18)                                                                | 408 | 3933209 3934222                    | 277.3938796      | 417.025666      | 1.50337            |
| Transketolase, C-terminal section (EC 2.2.1.1)                                                            | 407 | 3934326 3935276                    | 130.5263158      | 144.962105      | 1.1106             |
| Transketolase (EC 2.2.1.1)                                                                                | 406 | 3935280 3936107                    | 112.4546554      | 189.025393      | 1.6809             |
| Catabolite control protein A                                                                              | 405 | 3936262 3937290                    | 31.12840467      | 34.3959144      | 1.10497            |
| Ribose ABC transport system, periplasmic ribose-binding protein RbsB (TC 3.A.1.2.1)                       | 404 | 3937374 3938363                    | 1079.878665      | 1551.46057      | 1.4367             |
| Ribose ABC transport system, permease protein RbsC (TC 3.A.1.2.1)                                         | 403 | 3938400 3939401                    | 42.95704296      | 54.8446553      | 1.27673            |
| Ribose ABC transport system, ATP-binding protein RbsA (TC 3.A.1.2.1)                                      | 402 | 3939445 3940965                    | 79.60526316      | 104.68125       | 1.315              |
| Ribose operon repressor                                                                                   | 401 | 3941116 3942111                    | 16.08040201      | 23.379397       | 1.45391            |
| loll protein                                                                                              | 400 | 3942120 3942986                    | 17.32101617      | 12.8937644      | 0.7444             |
| Myo-inositol 2-dehydrogenase (EC 1.1.1.18)                                                                | 399 | 3943224 3944354                    | 61.0619469       | 103.754867      | 1.69917            |
| 5-keto-2-deoxygluconokinase B (EC 2.7.1.92)                                                               | 398 | 3944379 3945188                    | 71.6934487       | 128.820766      | 1.79683            |
| Epi-inositol hydrolase                                                                                    | 397 | 3945215 3947092                    | 85.77517315      | 112.036761      | 1.30617            |
| Inosose dehydratase (EC 4.2.1.44)                                                                         | 396 | 3947102 3948577                    | 196.6101695      | 227.735932      | 1.15831            |
| Phosphoglycerate kinase (EC 2.7.2.3)                                                                      | 395 | 3948580 3949836                    | 140.9235669      | 137.796975      | 0.97781            |
| NAD(P)-dependent glyceraldehyde 3-phosphate dehydrogenase archaeal (EC 1.2.1.59)                          | 394 | 3949900 3950928                    | 228.5992218      | 303.22714       | 1.32646            |
| NADP-dependent malic enzyme (EC 1.1.1.40)                                                                 | 393 | 3950983 3952437                    | 196.698762       | 196.467331      | 0.99882            |
| HIT family protein                                                                                        | 392 | 3952556 3952969                    | 104.1162228      | 108.145278      | 1.0387             |

|                                                                                                                                                    |     |         |         |             |            |         |
|----------------------------------------------------------------------------------------------------------------------------------------------------|-----|---------|---------|-------------|------------|---------|
| Transcriptional regulator                                                                                                                          | 391 | 3952982 | 3954304 | 96.06656581 | 135.844554 | 1.41407 |
| Periplasmic [Fe] hydrogenase (EC 1.12.7.2)                                                                                                         | 390 | 3954377 | 3955813 | 135.097493  | 150.331476 | 1.11276 |
| hypothetical protein                                                                                                                               |     | 3955848 | 3955970 | 52.17391304 | 48.5478261 | 0.9305  |
| Tryptophan synthase alpha chain (EC 4.2.1.20)                                                                                                      | 388 | 3956029 | 3956826 | 66.49937265 | 116.750314 | 1.75566 |
| Tryptophan synthase beta chain (EC 4.2.1.20)                                                                                                       | 387 | 3956819 | 3958027 | 138.2450331 | 243.40894  | 1.76071 |
| Phosphoribosylanthranilate isomerase (EC 5.3.1.24)                                                                                                 |     | 3958024 | 3958767 | 49.79811575 | 134.002019 | 2.69091 |
| Indole-3-glycerol phosphate synthase (EC 4.1.1.48)                                                                                                 | 385 | 3958764 | 3959657 | 21.27659574 | 54.1836506 | 2.54663 |
| Anthranilate phosphoribosyltransferase (EC 2.4.2.18)                                                                                               | 384 | 3959654 | 3960709 | 23.69668246 | 69.6772512 | 2.94038 |
| Anthranilate synthase, amidotransferase component (EC 4.1.3.27)                                                                                    | 383 | 3960702 | 3961277 | 38.26086957 | 59.8756522 | 1.56493 |
| Anthranilate synthase, aminase component (EC 4.1.3.27)                                                                                             | 382 | 3961274 | 3962782 | 10.61007958 | 62.9383289 | 5.93194 |
| Conserved domain protein                                                                                                                           | 381 | 3963024 | 3963584 | 12.5        | 11.63125   | 0.9305  |
| Heavy-metal-associated domain (N-terminus) and membrane-bounded cytochrome biogenesis cycZ-like domain, possible membrane copper tolerance protein | 380 | 3963692 | 3965275 | 7.580543272 | 8.81711939 | 1.16313 |
| Pheromone shutdown protein                                                                                                                         | 379 | 3965337 | 3966515 | 116.2988115 | 109.005942 | 0.93729 |
| Kef-type K <sup>+</sup> transport systems (NAD-binding component fused to domain related to exopolyphosphatase)                                    | 378 | 3966512 | 3967570 | 77.5047259  | 94.1053875 | 1.21419 |
| TPR repeat                                                                                                                                         | 377 | 3967572 | 3969032 | 187.6712329 | 170.166781 | 0.90673 |
| hypothetical protein                                                                                                                               |     | 3969119 | 3970966 | 86.62696264 | 71.0343801 | 0.82    |
| tRNA (5-methylaminomethyl-2-thiouridylate)-methyltransferase (EC 2.1.1.61)                                                                         | 375 | 3970981 | 3972081 | 128.1818182 | 100.663182 | 0.78532 |
| HDIG domain protein                                                                                                                                | 374 | 3972078 | 3972680 | 121.2624585 | 143.748339 | 1.18543 |
| Homoserine O-succinyltransferase (EC 2.3.1.46)                                                                                                     | 373 | 3972941 | 3973858 | 76.33587786 | 84.2219193 | 1.10331 |
| DNA-3-methyladenine glycosylase (EC 3.2.2.20)                                                                                                      | 372 | 3973908 | 3974501 | 52.27655987 | 45.505059  | 0.87047 |
| Probable zinc protease pqqL (EC 3.4.99.-)                                                                                                          | 371 | 3974573 | 3977449 | 103.2684284 | 110.327017 | 1.06835 |
| Putative NADH dehydrogenase/NAD(P)H nitroreductase AF_2267 (EC 1.-.-.-)                                                                            | 370 | 3977524 | 3978102 | 247.4048443 | 283.33564  | 1.14523 |
| 2-hydroxy-6-oxohepta-2,4-dienoate hydrolase                                                                                                        | 369 | 3978156 | 3978929 | 151.3583441 | 131.208926 | 0.86688 |
| UDP-N-acetylmuramoylalanyl-D-glutamyl-2,6-diaminopimelate--D-alanyl-D- alanyl ligase (EC 6.3.2.10)                                                 | 368 | 3978926 | 3980482 | 113.1105398 | 103.455334 | 0.91464 |
| D-alanine--D-alanine ligase (EC 6.3.2.4)                                                                                                           | 367 | 3980496 | 3981674 | 118.8455008 | 131.12309  | 1.10331 |
| Polysialic acid transport protein kpsD precursor                                                                                                   | 366 | 3981729 | 3983252 | 29.54694682 | 42.1565988 | 1.42677 |
| hypothetical protein                                                                                                                               | 365 | 3983313 | 3983441 | 7.8125      | 0          | 0       |
| hypothetical protein                                                                                                                               | 363 | 3983611 | 3983802 | 20.94240838 | 43.8455497 | 2.09363 |
| hypothetical protein                                                                                                                               |     | 3983754 | 3983924 | 52.94117647 | 27.3676471 | 0.51694 |
| hypothetical protein                                                                                                                               | 362 | 3983896 | 3984105 | 90.90909091 | 71.2344498 | 0.78358 |
| hypothetical protein                                                                                                                               | 361 | 3984083 | 3984316 | 98.71244635 | 35.9420601 | 0.36411 |
| ATPase                                                                                                                                             |     | 3984476 | 3984658 | 43.95604396 | 35.7884615 | 0.81419 |
| hypothetical protein                                                                                                                               |     | 3985014 | 3985160 | 6.849315068 | 0          | 0       |
| hypothetical protein                                                                                                                               | 358 | 3985646 | 3986557 | 15.36772777 | 20.428101  | 1.32929 |

|                                                                                                                                                                  |     |         |         |             |            |         |
|------------------------------------------------------------------------------------------------------------------------------------------------------------------|-----|---------|---------|-------------|------------|---------|
| Probable poly(beta-D-mannuronate) O-acetylase (EC 2.3.1.-)                                                                                                       | 357 | 3986573 | 3988132 | 33.35471456 | 31.6334189 | 0.94839 |
| Capsule polysaccharide export protein                                                                                                                            | 356 | 3988224 | 3989690 | 113.9154161 | 130.117667 | 1.14223 |
| Tyrosine-protein kinase wzc (EC 2.7.1.112)                                                                                                                       | 355 | 3989687 | 3990694 | 44.68718967 | 49.897716  | 1.1166  |
| Putative capsular polysaccharide biosynthesis protein D                                                                                                          | 354 | 3990706 | 3991896 | 44.53781513 | 21.1121849 | 0.47403 |
| Lipid carrier : UDP-N-acetylgalactosaminyltransferase (EC 2.4.1.-)                                                                                               | 353 | 3991908 | 3992573 | 24.06015038 | 22.3879699 | 0.9305  |
| UDP-glucose 4-epimerase (EC 5.1.3.2)                                                                                                                             | 352 | 3992570 | 3993331 | 11.82654402 | 6.11366623 | 0.51694 |
| Lipid carrier : UDP-N-acetylgalactosaminyltransferase (EC 2.4.1.-) / Alpha-1,3-N-acetylgalactosamine transferase PglA (EC 2.4.1.-); Putative glycosyltransferase |     | 3993487 | 3994239 | 26.59574468 | 17.3231383 | 0.65135 |
| Lipid carrier : UDP-N-acetylgalactosaminyltransferase (EC 2.4.1.-) / Alpha-1,3-N-acetylgalactosamine transferase PglA (EC 2.4.1.-); Putative glycosyltransferase |     | 3994232 | 3994606 | 8.021390374 | 2.48796791 | 0.31017 |
| hypothetical protein                                                                                                                                             | 349 | 3994599 | 3995648 | 50.52430887 | 26.6110582 | 0.5267  |
| hypothetical protein                                                                                                                                             | 348 | 3995669 | 3996955 | 22.55054432 | 6.51205288 | 0.28878 |
| hypothetical protein                                                                                                                                             | 346 | 3997086 | 3997265 | 0           | 10.396648  | #DIV/0! |
| hypothetical protein                                                                                                                                             | 347 | 3997223 | 3998230 | 42.70109235 | 17.5566038 | 0.41115 |
| UDP-glucose dehydrogenase (EC 1.1.1.22)                                                                                                                          | 345 | 3998217 | 3999482 | 36.36363636 | 19.1249012 | 0.52593 |
| UDP-glucose 4-epimerase (EC 5.1.3.2)                                                                                                                             | 344 | 3999489 | 4000460 | 42.22451081 | 16.2909372 | 0.38582 |
| Alpha-1,4-N-acetylgalactosamine transferase PglH (EC 2.4.1.-)                                                                                                    | 343 | 4000476 | 4001561 | 19.35483871 | 4.28801843 | 0.22155 |
| capsular polysaccharide biosynthesis protein                                                                                                                     | 342 | 4001549 | 4002652 | 17.22574796 | 7.59247507 | 0.44076 |
| hypothetical protein                                                                                                                                             | 341 | 4002649 | 4003821 | 3.412969283 | 0          | 0       |
| Asparagine synthetase [glutamine-hydrolyzing] (EC 6.3.5.4)                                                                                                       | 340 | 4003891 | 4005780 | 50.29115934 | 35.958973  | 0.71502 |
| hypothetical protein                                                                                                                                             | 339 | 4005806 | 4006873 | 22.49297095 | 8.72071228 | 0.38771 |
| Lipopolysaccharide biosynthesis protein                                                                                                                          | 338 | 4006967 | 4008277 | 14.50381679 | 3.55152672 | 0.24487 |
| Aminotransferase                                                                                                                                                 | 337 | 4008271 | 4009371 | 44.54545455 | 35.5281818 | 0.79757 |
| Phosphoglycolate phosphatase (EC 3.1.3.18)                                                                                                                       | 336 | 4009428 | 4010048 | 6.451612903 | 3.0016129  | 0.46525 |
| Transketolase, C-terminal section (EC 2.2.1.1)                                                                                                                   | 335 | 4010104 | 4011045 | 62.69925611 | 43.5090329 | 0.69393 |
| Transketolase, N-terminal section (EC 2.2.1.1)                                                                                                                   | 334 | 4011042 | 4011878 | 68.18181818 | 36.7302632 | 0.53871 |
| dTDP-glucose 4,6-dehydratase (EC 4.2.1.46)                                                                                                                       | 333 | 4011924 | 4012799 | 3.428571429 | 1.06342857 | 0.31017 |
| Xanthan biosynthesis acetyltransferase GumF                                                                                                                      | 332 | 4012888 | 4013970 | 16.63585952 | 4.29990758 | 0.25847 |
| Putative carbamoylphosphate synthase large subunit, short form                                                                                                   | 331 | 4013967 | 4015037 | 30.8411215  | 37.3939252 | 1.21247 |
| Ubiquinone biosynthesis SAM-dependent O-methyltransferase (EC 2.1.1.-)                                                                                           |     | 4015095 | 4015358 | 53.23193916 | 45.9942966 | 0.86404 |
| Ubiquinone biosynthesis SAM-dependent O-methyltransferase (EC 2.1.1.-)                                                                                           |     | 4015438 | 4015665 | 105.7268722 | 49.1894273 | 0.46525 |
| hypothetical protein                                                                                                                                             | 328 | 4015961 | 4016398 | 70.9382151  | 31.9393593 | 0.45024 |
| Tlr1343 protein                                                                                                                                                  | 327 | 4016395 | 4016793 | 22.61306533 | 16.3655779 | 0.72372 |
| hypothetical protein                                                                                                                                             |     | 4016903 | 4017076 | 5.780346821 | 0          | 0       |
| hypothetical protein                                                                                                                                             |     | 4017052 | 4017225 | 121.3872832 | 59.1647399 | 0.4874  |
| VapC toxin protein                                                                                                                                               | 324 | 4017216 | 4017653 | 27.45995423 | 25.5514874 | 0.9305  |
| Virulence associated protein B                                                                                                                                   | 323 | 4017616 | 4017840 | 35.71428571 | 12.4620536 | 0.34894 |
| hypothetical protein                                                                                                                                             | 322 | 4017950 | 4018633 | 234.2606149 | 245.22694  | 1.04681 |
| hypothetical protein                                                                                                                                             | 321 | 4018630 | 4019508 | 236.9020501 | 162.148633 | 0.68445 |
| hypothetical protein                                                                                                                                             | 320 | 4019556 | 4019957 | 97.25685786 | 62.6521197 | 0.64419 |



|                                                                   |     |         |         |             |            |         |
|-------------------------------------------------------------------|-----|---------|---------|-------------|------------|---------|
| hypothetical protein                                              | 319 | 4019954 | 4020184 | 173.9130435 | 145.643478 | 0.83745 |
| ATPase                                                            | 318 | 4020348 | 4021559 | 240.297275  | 264.320396 | 1.09997 |
| hypothetical protein                                              | 317 | 4021636 | 4022088 | 278.7610619 | 275.856195 | 0.98958 |
| hypothetical protein                                              | 316 | 4022081 | 4022368 | 696.8641115 | 654.916376 | 0.93981 |
| hypothetical protein                                              | 315 | 4022365 | 4022778 | 692.4939467 | 675.90799  | 0.97605 |
| Undecaprenyl-diphosphatase (EC 3.6.1.27)                          | 314 | 4023121 | 4023918 | 76.5370138  | 64.2126725 | 0.83898 |
| Heat shock protein GrpE                                           | 313 | 4024036 | 4024719 | 114.2020498 | 189.369693 | 1.6582  |
| Chaperone protein DnaK                                            | 312 | 4024761 | 4026704 | 465.7963446 | 797.849086 | 1.71287 |
| Chaperone protein DnaJ                                            | 311 | 4026762 | 4027886 | 115.658363  | 218.551601 | 1.88963 |
| Electron transport complex protein rnfC                           | 310 | 4028093 | 4029496 | 506.7712046 | 552.463649 | 1.09016 |
| Electron transport complex protein rnfD                           | 309 | 4029508 | 4030560 | 381.1787072 | 468.788023 | 1.22984 |
| Electron transport complex protein rnfG                           | 308 | 4030557 | 4031168 | 235.6792144 | 216.253682 | 0.91758 |
| Na(+)-translocating NADH-quinone reductase subunit D (EC 1.6.5.-) | 307 | 4031165 | 4031773 | 291.1184211 | 364.241776 | 1.25118 |
| Electron transport complex protein rnfA                           | 306 | 4031770 | 4032366 | 239.9328859 | 187.348993 | 0.78084 |
| Electron transport complex protein rnfB                           | 305 | 4032379 | 4033197 | 288.5085575 | 241.156479 | 0.83587 |
| hypothetical protein                                              | 304 | 4033181 | 4034014 | 140.4561825 | 185.429772 | 1.3202  |
| Metallo-beta-lactamase family protein, RNA-specific               | 303 | 4034047 | 4035480 | 139.5673412 | 144.152826 | 1.03286 |
| Aldo/keto reductase                                               | 302 | 4035496 | 4036701 | 94.60580913 | 65.6369295 | 0.69379 |
| TrmH family tRNA/rRNA methyltransferase YacO (EC 2.1.1.-)         | 301 | 4036719 | 4037444 | 70.34482759 | 66.7393103 | 0.94875 |
| hypothetical protein                                              | 300 | 4037527 | 4037997 | 191.4893617 | 211.837234 | 1.10626 |
| Peptidase, M48 family                                             | 299 | 4038002 | 4038922 | 216.3043478 | 226.556522 | 1.0474  |
| Adenylate cyclase (EC 4.6.1.1)                                    | 298 | 4039029 | 4041224 | 22.7998176  | 36.4901961 | 1.60046 |
| hypothetical protein                                              |     | 4041243 | 4041416 | 260.1156069 | 91.4364162 | 0.35152 |
| Flagellin protein flaA                                            | 296 | 4041436 | 4042458 | 2064.646465 | 2736.98586 | 1.32564 |
| PUTATIVE ZINC PROTEASE PROTEIN                                    | 295 | 4042586 | 4043659 | 39.14259087 | 20.8126747 | 0.53171 |
| hypothetical protein                                              | 294 | 4043699 | 4044130 | 58.00464037 | 45.337587  | 0.78162 |
| Tetrapyrrole (Corrin-Porphyrin) methylase family protein UPF0011  | 293 | 4044147 | 4044893 | 128.6863271 | 99.7855228 | 0.77542 |
| hypothetical protein                                              | 292 | 4044936 | 4045220 | 1179.577465 | 1140.19014 | 0.96661 |
| RNA methyltransferase, TrmH family                                | 291 | 4045252 | 4046133 | 44.26787741 | 40.1350738 | 0.90664 |
| Conserved protein                                                 | 290 | 4046151 | 4046573 | 63.98104265 | 41.8945498 | 0.6548  |
| 2,4-dihydroxyhept-2-ene-1,7-dioic acid aldolase (EC 4.1.2.-)      | 289 | 4046655 | 4047419 | 95.54973822 | 80.3835079 | 0.84127 |
| EBSC protein                                                      | 288 | 4047438 | 4047935 | 94.56740443 | 63.6559356 | 0.67313 |
| hypothetical protein                                              | 287 | 4047976 | 4048449 | 131.0782241 | 125.902748 | 0.96052 |
| hypothetical protein                                              | 286 | 4048495 | 4048989 | 52.63157895 | 50.8572874 | 0.96629 |
| Ferric iron ABC transporter, permease protein                     | 285 | 4049052 | 4050626 | 29.2249047  | 35.4701398 | 1.2137  |
| Ferric iron ABC transporter, ATP-binding protein                  | 284 | 4050623 | 4051387 | 176.7015707 | 215.573953 | 1.21999 |
| Ferric iron ABC transporter, iron-binding protein                 | 283 | 4051400 | 4052428 | 242.2178988 | 263.400292 | 1.08745 |
| DNA gyrase subunit A (EC 5.99.1.3)                                | 282 | 4052428 | 4054974 | 216.4179104 | 227.691084 | 1.05209 |
| diguanylate cyclase (GGDEF domain) with PAS/PAC sensor            | 281 | 4055144 | 4056181 | 99.32497589 | 81.6542912 | 0.82209 |
| Sensory box histidine kinase/response regulator                   | 280 | 4056213 | 4057883 | 58.68263473 | 54.6041916 | 0.9305  |
| DNA gyrase subunit B (EC 5.99.1.3)                                | 279 | 4057920 | 4059827 | 187.2050341 | 205.422391 | 1.09731 |

***T. azotonutricium***

|  | TREAZ # | Start | End | Normalized Avg. RNA-Seq |            | Ratio |
|--|---------|-------|-----|-------------------------|------------|-------|
|  |         |       |     | Single Culture          | Co-Culture |       |

|                                                                                                                    |      |       |       |             |            |         |
|--------------------------------------------------------------------------------------------------------------------|------|-------|-------|-------------|------------|---------|
| Chromosomal replication initiator protein dnaA                                                                     | 2339 | 301   | 1716  | 215.9010601 | 248.056537 | 1.14894 |
| DNA polymerase III beta subunit (EC 2.7.7.7)                                                                       | 2338 | 1958  | 3058  | 313.1818182 | 355.909091 | 1.13643 |
| DNA recombination and repair protein RecF                                                                          | 2337 | 3084  | 4196  | 160.971223  | 171.98741  | 1.06844 |
| Uncharacterized protein TP_0004                                                                                    | 2336 | 4193  | 4675  | 255.186722  | 256.742739 | 1.0061  |
| radical activating enzyme                                                                                          | 2335 | 4720  | 5655  | 85.02673797 | 72.1925134 | 0.84906 |
| Similarities with trjQ8EAT4 <i>Shewanella</i>                                                                      |      |       |       |             |            |         |
| oneidensis                                                                                                         | 2334 | 5669  | 6718  | 328.884652  | 302.430887 | 0.91957 |
| hypothetical protein                                                                                               | 2333 | 6721  | 8817  | 147.1851145 | 115.935115 | 0.78768 |
| DNA modification methylase (Adenine-specific methyltransferase) (EC 2.1.1.72)                                      | 2332 | 8828  | 9970  | 45.97197898 | 41.3747811 | 0.9     |
| hypothetical protein                                                                                               | 2331 | 9983  | 10666 | 81.99121523 | 23.0600293 | 0.28125 |
| Shikimate kinase (EC 2.7.1.71)                                                                                     | 2329 | 10708 | 11271 | 80.81705151 | 59.946714  | 0.74176 |
| TPR domain protein, putative component of TonB system                                                              | 2330 | 11231 | 13984 | 116.6000726 | 84.1808936 | 0.72196 |
| Periplasmic sugar-binding protein of sugar ABC transporter                                                         | 2328 | 14046 | 15293 | 61.34723336 | 63.1515638 | 1.02941 |
| L-asparaginase (EC 3.5.1.1)                                                                                        | 2327 | 15352 | 16242 | 93.25842697 | 75.8426966 | 0.81325 |
| RNA methyltransferase, TrmH family                                                                                 | 2325 | 16269 | 17093 | 35.80097087 | 16.3834951 | 0.45763 |
| DNA-binding response regulator                                                                                     | 2326 | 17083 | 18642 | 24.05388069 | 12.9890956 | 0.54    |
| Two-component sensor histidine kinase                                                                              | 2324 | 18642 | 20135 | 43.87139987 | 31.6476892 | 0.72137 |
| Methylcobalamin:coenzyme M methyltransferase, methanol-specific                                                    | 2323 | 20149 | 21177 | 109.922179  | 102.86965  | 0.93584 |
| Ribose ABC transport system, periplasmic ribose-binding protein RbsB (TC 3.A.1.2.1)                                | 2322 | 21257 | 22243 | 669.8782961 | 695.993915 | 1.03899 |
| D-xylose transport ATP-binding protein xylG                                                                        | 2321 | 22287 | 23831 | 135.6865285 | 135.524611 | 0.99881 |
| Ribose ABC transport system, permease protein RbsC (TC 3.A.1.2.1)                                                  | 2320 | 23821 | 24837 | 153.0511811 | 205.954724 | 1.34566 |
| hypothetical protein                                                                                               | 2319 | 24898 | 25077 | 2.793296089 | 0          | 0       |
| Multiple sugar ABC transporter, substrate-binding protein                                                          | 2318 | 25167 | 26672 | 536.8770764 | 430.564784 | 0.80198 |
| Multiple sugar ABC transporter, membrane-spanning permease protein MsmF                                            | 2317 | 26701 | 27615 | 223.7417943 | 157.549234 | 0.70416 |
| Multiple sugar ABC transporter, membrane-spanning permease protein MsmG                                            | 2316 | 27612 | 28463 | 131.6098707 | 116.333725 | 0.88393 |
| Conserved protein                                                                                                  | 2315 | 28471 | 28827 | 106.741573  | 145.365169 | 1.36184 |
| Inactive homolog of metal-dependent proteases, putative molecular chaperone / Beta-phosphoglucomutase (EC 5.4.2.6) | 2314 | 28853 | 29524 | 220.5663189 | 211.251863 | 0.95777 |
| Oxidoreductase, aldo/keto reductase family                                                                         | 2313 | 29587 | 30738 | 195.9165943 | 207.211121 | 1.05765 |
| Ferredoxin                                                                                                         | 2312 | 30777 | 31790 | 119.94077   | 86.6238894 | 0.72222 |
| hypothetical protein                                                                                               | 2311 | 32157 | 32477 | 0           | 0          | #DIV/0! |
| Response regulator receiver modulated metal dependent phosphohydrolase                                             | 2310 | 32658 | 33056 | 36.4321608  | 11.3065327 | 0.31034 |
| Galactose/methyl galactoside ABC transport system, D-galactose-binding periplasmic protein MglB (TC 3.A.1.2.3)     | 2309 | 33191 | 34285 | 3655.850091 | 3681.44424 | 1.007   |
| Galactose/methyl galactoside ABC transport system, ATP-binding protein MglA (EC 3.6.3.17)                          | 2308 | 34357 | 35892 | 175.8957655 | 240.390879 | 1.36667 |
| Ribose ABC transport system, permease protein RbsC (TC 3.A.1.2.1)                                                  | 2307 | 35889 | 36890 | 186.8131868 | 193.306693 | 1.03476 |

|                                                                                      |      |       |       |             |            |         |
|--------------------------------------------------------------------------------------|------|-------|-------|-------------|------------|---------|
| Methylmalonate-semialdehyde dehydrogenase [inositol] (EC 1.2.1.27)                   | 2306 | 36891 | 38402 | 142.9516876 | 171.244209 | 1.19792 |
| 5-keto-2-deoxygluconokinase B (EC 2.7.1.92)                                          |      | 38399 | 39175 | 48.32474227 | 34.7938144 | 0.72    |
| Transaldolase (EC 2.2.1.2)                                                           | 2304 | 39188 | 40282 | 109.6892139 | 76.0968921 | 0.69375 |
| Osmosensitive K <sup>+</sup> channel histidine kinase kdpD (EC 2.7.3.-)              | 2303 | 40336 | 42030 | 33.9433294  | 9.29752066 | 0.27391 |
| Phosphate regulon transcriptional regulatory protein phoB                            | 2302 | 42027 | 42722 | 42.44604317 | 16.1870504 | 0.38136 |
| Phosphate transport system regulatory protein PhoU                                   | 2301 | 42719 | 43375 | 83.07926829 | 37.7286585 | 0.45413 |
| Phosphate transport ATP-binding protein pstB (TC 3.A.1.7.1)                          | 2300 | 43375 | 44133 | 52.11081794 | 14.8416887 | 0.28481 |
| Phosphate transport system permease protein pstA (TC 3.A.1.7.1)                      | 2299 | 44130 | 44978 | 56.01415094 | 21.2264151 | 0.37895 |
| Phosphate transport system permease protein pstC (TC 3.A.1.7.1)                      | 2298 | 44975 | 45826 | 39.36545241 | 7.93184489 | 0.20149 |
| Phosphate ABC transporter, periplasmic phosphate-binding protein pstS (TC 3.A.1.7.1) | 2297 | 45864 | 46715 | 46.4159812  | 29.0834313 | 0.62658 |
| hypothetical protein                                                                 | 2296 | 46813 | 47544 | 195.622435  | 135.430917 | 0.69231 |
| Clumping factor ClfA, fibrinogen-binding protein                                     | 2295 | 47683 | 50826 | 152.4021635 | 103.086223 | 0.67641 |
| hypothetical protein                                                                 | 2294 | 50777 | 50896 | 67.22689076 | 18.907563  | 0.28125 |
| hypothetical protein                                                                 | 2292 | 51148 | 52395 | 81.39534884 | 173.215718 | 2.12808 |
| hypothetical protein                                                                 | 2291 | 52469 | 52981 | 60.546875   | 21.9726563 | 0.3629  |
| Cell division protein ftsH (EC 3.4.24.-)                                             | 2290 | 53077 | 55128 | 305.7045344 | 228.181375 | 0.74641 |
| transposase, mutator family                                                          | 2289 | 55232 | 56473 | 70.10475423 | 65.2699436 | 0.93103 |
| putative NADH-dependent flavin oxidoreductase                                        | 2288 | 56570 | 57544 | 38.6996904  | 25.5417957 | 0.66    |
| Alpha-galactosidase (EC 3.2.1.22)                                                    | 2287 | 57698 | 59932 | 183.3034915 | 105.752014 | 0.57692 |
| hypothetical protein                                                                 | 2286 | 60003 | 60434 | 138.0510441 | 161.832947 | 1.17227 |
| Glutamate synthase [NADPH] small chain (EC 1.4.1.13)                                 |      | 60463 | 61302 | 204.4100119 | 179.678188 | 0.87901 |
| Glutamate synthase [NADPH] small chain (EC 1.4.1.13)                                 | 2284 | 61317 | 62819 | 194.4074567 | 206.724368 | 1.06336 |
| Oxidoreductase, Gfo/Idh/MocA family                                                  | 2283 | 62835 | 64094 | 219.618745  | 235.901509 | 1.07414 |
| TPR domain protein                                                                   | 2282 | 64082 | 64750 | 135.4790419 | 121.257485 | 0.89503 |
| Sugar diacid utilization regulator SdaR                                              | 2281 | 64777 | 65955 | 60.27164686 | 26.7402377 | 0.44366 |
| D-glycerate transporter (predicted)                                                  | 2280 | 66130 | 67464 | 48.72563718 | 13.4932534 | 0.27692 |
| Methylcobalamin:coenzyme M methyltransferase, methanol-specific                      | 2279 | 67493 | 68533 | 44.71153846 | 15.1442308 | 0.33871 |
| Methylcobalamin:coenzyme M methyltransferase, methanol-specific                      | 2278 | 68556 | 69590 | 94.29400387 | 50.0483559 | 0.53077 |
| ATPase                                                                               | 2277 | 69605 | 70786 | 54.19136325 | 40.0084674 | 0.73828 |
| FKBP-type peptidyl-prolyl cis-trans isomerase slyD (EC 5.2.1.8)                      | 2276 | 70891 | 71430 | 401.6697588 | 496.753247 | 1.23672 |
| Fe-S OXIDOREDUCTASE (1.8.-.-)                                                        | 2275 | 71591 | 73369 | 131.3273341 | 144.263217 | 1.0985  |
| NifU-like domain protein                                                             | 2274 | 73376 | 73600 | 774.5535714 | 823.660714 | 1.0634  |
| hypothetical protein                                                                 | 2273 | 73797 | 74606 | 220.0247219 | 144.622991 | 0.6573  |
| hypothetical protein                                                                 | 2272 | 74628 | 74858 | 747.826087  | 567.391304 | 0.75872 |
| hypothetical protein                                                                 | 2271 | 74870 | 75121 | 278.8844622 | 197.211155 | 0.70714 |
| hypothetical protein                                                                 | 2270 | 75472 | 76140 | 103.2934132 | 67.3652695 | 0.65217 |
| DNA-damage-inducible protein J                                                       | 2269 | 76337 | 76609 | 34.92647059 | 8.27205882 | 0.23684 |
| hypothetical protein                                                                 | 2268 | 76800 | 76919 | 21.00840336 | 0          | 0       |

|                                                                                                                                                                                                                |      |        |        |             |            |         |
|----------------------------------------------------------------------------------------------------------------------------------------------------------------------------------------------------------------|------|--------|--------|-------------|------------|---------|
| hypothetical protein                                                                                                                                                                                           | 2267 | 76985  | 77557  | 298.951049  | 444.493007 | 1.48684 |
| Glutaminyl-tRNA synthetase (EC 6.1.1.18)                                                                                                                                                                       | 2266 | 77615  | 79369  | 221.4611872 | 362.157534 | 1.63531 |
| Ferredoxin                                                                                                                                                                                                     | 2265 | 79407  | 80537  | 399.5575221 | 629.20354  | 1.57475 |
| Cobalamin synthase                                                                                                                                                                                             | 2264 | 80627  | 81436  | 43.26328801 | 19.4684796 | 0.45    |
| Nicotinate-nucleotide--dimethylbenzimidazole<br>phosphoribosyltransferase (EC 2.4.2.21)                                                                                                                        | 2263 | 81436  | 82482  | 41.58699809 | 27.9636711 | 0.67241 |
| hypothetical protein                                                                                                                                                                                           | 2262 | 82484  | 83230  | 4.021447721 | 6.03217158 | 1.5     |
| Adenosylcobinamide-phosphate<br>guanylyltransferase (EC 2.7.7.62)                                                                                                                                              | 2261 | 83230  | 83748  | 18.33976834 | 13.030888  | 0.71053 |
| Nitrogenase vanadium-cofactor synthesis protein<br>VnfN                                                                                                                                                        | 2260 | 83757  | 85106  | 15.93773165 | 8.33951075 | 0.52326 |
| Nitrogenase iron protein (EC 1.18.6.1)                                                                                                                                                                         | 2259 | 85057  | 87252  | 29.61275626 | 13.3257403 | 0.45    |
| Vitamin B12 ABC transporter, ATPase<br>component BtuD                                                                                                                                                          | 2258 | 87245  | 88012  | 29.98696219 | 23.4680574 | 0.78261 |
| Vitamin B12 ABC transporter, permease<br>component BtuC                                                                                                                                                        | 2257 | 88013  | 89026  | 49.85192498 | 15.5478776 | 0.31188 |
| Vitamin B12 ABC transporter, B12-binding<br>component BtuF                                                                                                                                                     | 2256 | 89013  | 89915  | 42.1286031  | 22.4501109 | 0.53289 |
| Outer membrane vitamin B12 receptor BtuB                                                                                                                                                                       | 2255 | 89924  | 91933  | 43.80288701 | 50.3982081 | 1.15057 |
| hypothetical protein                                                                                                                                                                                           | 2254 | 91930  | 92526  | 83.05369128 | 154.781879 | 1.86364 |
| hypothetical protein                                                                                                                                                                                           | 2253 | 92597  | 92782  | 59.45945946 | 206.756757 | 3.47727 |
| hypothetical protein                                                                                                                                                                                           | 2252 | 92845  | 92973  | 11.71875    | 0          | 0       |
| hypothetical protein                                                                                                                                                                                           | 2251 | 93018  | 94169  | 48.21894005 | 25.4126846 | 0.52703 |
| hypothetical protein                                                                                                                                                                                           | 2250 | 94339  | 94458  | 21.00840336 | 0          | 0       |
| Uncharacterized protein TP_1001                                                                                                                                                                                | 2249 | 94457  | 95482  | 131.7073171 | 111.95122  | 0.85    |
| Thioredoxin                                                                                                                                                                                                    | 2248 | 95486  | 95815  | 613.9817629 | 649.696049 | 1.05817 |
| PilT protein, N-terminal                                                                                                                                                                                       | 2247 | 95902  | 96300  | 115.5778894 | 73.4924623 | 0.63587 |
| hypothetical protein                                                                                                                                                                                           | 2246 | 96297  | 96542  | 432.6530612 | 541.836735 | 1.25236 |
| Multiple antibiotic resistance (MarC) -related<br>proteins                                                                                                                                                     | 2245 | 96684  | 97334  | 127.6923077 | 117.692308 | 0.92169 |
| Peptidase, U32 family                                                                                                                                                                                          | 2244 | 97331  | 99586  | 161.6407982 | 208.536585 | 1.29012 |
| Single-stranded DNA-binding protein                                                                                                                                                                            | 2243 | 99788  | 100249 | 48.80694143 | 24.4034707 | 0.5     |
| hypothetical protein                                                                                                                                                                                           | 2242 | 100416 | 102368 | 150.102459  | 138.319672 | 0.9215  |
| Cobalt-zinc-cadmium resistance protein                                                                                                                                                                         | 2241 | 102389 | 103333 | 160.4872881 | 85.8050847 | 0.53465 |
| Dephospho-CoA kinase (EC 2.7.1.24)                                                                                                                                                                             | 2240 | 103372 | 103986 | 131.1074919 | 124.592834 | 0.95031 |
| Cell division protein                                                                                                                                                                                          | 2239 | 103988 | 104716 | 381.8681319 | 287.431319 | 0.7527  |
| Response regulator receiver precursor                                                                                                                                                                          | 2238 | 104735 | 107617 | 70.4078076  | 36.0752876 | 0.51238 |
| Phenylalanyl-tRNA synthetase alpha chain (EC<br>6.1.1.20)                                                                                                                                                      | 2237 | 107752 | 109368 | 251.396648  | 275.139665 | 1.09444 |
| hypothetical protein                                                                                                                                                                                           | 2236 | 109439 | 110347 | 137.5690608 | 96.961326  | 0.70482 |
| hypothetical protein                                                                                                                                                                                           | 2235 | 110600 | 110719 | 33.61344538 | 0          | 0       |
| Methyl-accepting chemotaxis protein                                                                                                                                                                            | 2234 | 110718 | 112874 | 36.19489559 | 4.17633411 | 0.11538 |
| hypothetical protein                                                                                                                                                                                           | 2233 | 112890 | 113951 | 35.34401508 | 19.0857681 | 0.54    |
| TRAP-type C4-dicarboxylate transport system,<br>large permease component                                                                                                                                       | 2232 | 113963 | 115252 | 32.97129558 | 29.674166  | 0.9     |
| TRAP-type transport system, large permease<br>component, predicted N-acetylneuraminate<br>transporter / TRAP-type transport system, small<br>permease component, predicted N-<br>acetylneuraminate transporter | 2231 | 115262 | 115738 | 37.81512605 | 14.1806723 | 0.375   |
| TRAP-type C4-dicarboxylate transport system,<br>periplasmic component                                                                                                                                          | 2230 | 115751 | 116764 | 79.60199005 | 89.5522388 | 1.125   |

|                                                       |      |        |        |             |            |         |
|-------------------------------------------------------|------|--------|--------|-------------|------------|---------|
| Transcriptional regulator, GntR family                | 2229 | 116906 | 117640 | 47.0027248  | 67.4386921 | 1.43478 |
| Uncharacterized protein TP_0983 precursor             | 2228 | 117687 | 118376 | 123.3671988 | 111.030479 | 0.9     |
| Rhomboid family protein                               | 2227 | 118384 | 119025 | 84.24336973 | 38.6115445 | 0.45833 |
| Hydroxypyruvate isomerase (EC 5.3.1.22)               | 2226 | 119022 | 119774 | 138.2978723 | 158.577128 | 1.14663 |
| tRNA dihydrouridine synthase B (EC 1.-.-.-)           | 2225 | 119789 | 120787 | 68.63727455 | 83.4168337 | 1.21533 |
| Putative deoxyribonuclease YcfH                       | 2224 | 120788 | 121621 | 158.4633854 | 248.4994   | 1.56818 |
| fructose response regulator of fruA and EII           |      |        |        |             |            |         |
| fructose/mannose                                      | 2223 | 121741 | 122424 | 71.74231332 | 49.4143485 | 0.68878 |
| Xylulose kinase (EC 2.7.1.17)                         | 2222 | 122461 | 123948 | 304.3039677 | 276.899798 | 0.90994 |
| hypothetical protein                                  |      | 123953 | 124102 | 43.62416107 | 75.5033557 | 1.73077 |
| HIPA PROTEIN                                          |      | 124111 | 124431 | 89.0625     | 63.28125   | 0.71053 |
| hypothetical protein                                  | 2219 | 124424 | 124750 | 61.34969325 | 55.2147239 | 0.9     |
| Undecaprenyl-diphosphatase (EC 3.6.1.27)              | 2218 | 124894 | 125730 | 199.1626794 | 126.495215 | 0.63514 |
| Phosphoenolpyruvate phosphomutase (EC 5.4.2.9)        | 2217 | 125737 | 127035 | 315.8705701 | 107.473035 | 0.34024 |
| 2-aminoethylphosphonate:pyruvate                      |      |        |        |             |            |         |
| aminotransferase (EC 2.6.1.37)                        | 2216 | 127046 | 128641 | 245.1410658 | 87.460815  | 0.35678 |
| Phosphonopyruvate decarboxylase (EC 4.1.1.82)         | 2215 | 128641 | 129825 | 197.2128378 | 55.1097973 | 0.27944 |
| putative integral membrane protein                    | 2214 | 129925 | 130695 | 92.85714286 | 90.5844156 | 0.97552 |
| Heat shock protein GrpE                               | 2213 | 130801 | 131475 | 335.3115727 | 480.712166 | 1.43363 |
| Chaperone protein DnaK                                | 2212 | 131512 | 133458 | 763.8164755 | 974.843587 | 1.27628 |
| Chaperone protein DnaJ                                | 2211 | 133541 | 134677 | 552.8169014 | 683.318662 | 1.23607 |
| Pantothenate kinase type II, eukaryotic (EC 2.7.1.33) | 2210 | 134674 | 135477 | 156.8123393 | 216.902314 | 1.3832  |
| Oxidoreductase, aldo/keto reductase family            | 2208 | 135493 | 136521 | 272.8599222 | 341.439689 | 1.25134 |
| hypothetical protein                                  | 2209 | 136482 | 137981 | 46.69779853 | 16.5110073 | 0.35357 |
| hypothetical protein                                  | 2207 | 137948 | 138070 | 24.59016393 | 0          | 0       |
| hypothetical protein                                  | 2205 | 138088 | 138501 | 93.22033898 | 59.9273608 | 0.64286 |
| hypothetical protein                                  | 2206 | 138498 | 139193 | 418.705036  | 271.942446 | 0.64948 |
| membrane protein, putative                            | 2203 | 139271 | 140104 | 154.2617047 | 135.054022 | 0.87549 |
| Integral membrane protein                             | 2204 | 140099 | 140704 | 201.6528926 | 189.669421 | 0.94057 |
| hypothetical protein                                  | 2202 | 141470 | 142213 | 14.80484522 | 9.08479139 | 0.61364 |
| 6-aminohexanoate-dimer hydrolase (EC 3.5.1.46)        | 2201 | 142210 | 143313 | 40.79782412 | 16.3191296 | 0.4     |
| diguanylate cyclase/phosphodiesterase (GGDEF          |      |        |        |             |            |         |
| & EAL domains) with PAS/PAC sensor(s)                 | 2200 | 143455 | 144813 | 263.622975  | 236.929308 | 0.89874 |
| membrane protein, putative                            | 2199 | 144825 | 145496 | 44.70938897 | 23.4724292 | 0.525   |
| Putative transport protein                            | 2198 | 145551 | 146681 | 141.1504425 | 85.619469  | 0.60658 |
| hypothetical protein                                  | 2197 | 146746 | 147903 | 333.6214347 | 410.328436 | 1.22992 |
| sensory box histidine kinase/response regulator       | 2195 | 147926 | 149662 | 186.3479263 | 233.294931 | 1.25193 |
| glutamate transporter, putative                       | 2196 | 149659 | 150831 | 187.7133106 | 188.139932 | 1.00227 |
| Nucleoside diphosphate kinase (EC 2.7.4.6)            | 2194 | 151005 | 151448 | 94.80812641 | 66.027088  | 0.69643 |
| Putative Heme-regulated two-component                 |      |        |        |             |            |         |
| response regulator                                    | 2193 | 151525 | 152673 | 71.42857143 | 54.8780488 | 0.76829 |
| GGDEF domain protein                                  | 2191 | 152670 | 153872 | 116.8885191 | 74.875208  | 0.64057 |
| Flagellar hook-length control protein fliK            | 2192 | 153869 | 155209 | 108.9552239 | 124.253731 | 1.14041 |
| hypothetical protein                                  | 2189 | 155208 | 155345 | 65.69343066 | 32.8467153 | 0.5     |
| Signal recognition particle, subunit Ffh SRP54        |      |        |        |             |            |         |
| (TC 3.A.5.1.1)                                        | 2190 | 155338 | 156687 | 246.8495182 | 246.849518 | 1       |



|                                                                                  |      |        |        |             |            |         |
|----------------------------------------------------------------------------------|------|--------|--------|-------------|------------|---------|
| hypothetical protein                                                             | 2188 | 156782 | 156973 | 26.17801047 | 47.1204188 | 1.8     |
| Large repetitive protein                                                         | 2187 | 156942 | 162152 | 508.5412668 | 628.790787 | 1.23646 |
| Flagellar hook-length control protein fliK                                       | 2186 | 162254 | 172549 | 606.6537154 | 725.594949 | 1.19606 |
| hypothetical protein                                                             | 2185 | 172658 | 173719 | 74.45805844 | 97.5494816 | 1.31013 |
| hypothetical protein                                                             | 2184 | 173752 | 173964 | 99.05660377 | 74.2924528 | 0.75    |
| Membrane spanning protein                                                        | 2183 | 174098 | 175678 | 222.4683544 | 166.613924 | 0.74893 |
| Nitrogen regulatory protein P-II                                                 | 2182 | 175671 | 176483 | 187.1921182 | 169.027094 | 0.90296 |
| LysM domain protein                                                              | 2181 | 176550 | 177053 | 2147.117296 | 2419.98012 | 1.12708 |
| S-adenosylmethionine synthetase (EC 2.5.1.6)                                     | 2180 | 177078 | 178247 | 688.1950385 | 831.479897 | 1.2082  |
| methylated-DNA--protein-cysteine<br>methyltransferase-related protein            | 2179 | 178683 | 178991 | 212.6623377 | 189.935065 | 0.89313 |
| Aquaporin Z                                                                      | 2178 | 179204 | 179866 | 218.2779456 | 156.344411 | 0.71626 |
| Methyl-accepting chemotaxis protein                                              | 2177 | 180040 | 182217 | 419.7416974 | 408.902214 | 0.97418 |
| hypothetical protein                                                             | 2176 | 182346 | 182789 | 217.8329571 | 264.108352 | 1.21244 |
| Peptidase, M48 family                                                            | 2175 | 182789 | 183679 | 187.6404494 | 151.685393 | 0.80838 |
| Adenylate cyclase (EC 4.6.1.1)                                                   | 2174 | 183676 | 185931 | 87.36141907 | 54.8780488 | 0.62817 |
| hypothetical protein                                                             | 2173 | 185943 | 186419 | 154.4117647 | 118.172269 | 0.76531 |
| Peptidase, M48 family                                                            | 2172 | 186416 | 187336 | 236.4130435 | 225        | 0.95172 |
| Flagellin protein flaA                                                           | 2171 | 187584 | 188513 | 5786.111111 | 4022.5     | 0.6952  |
| Predicted L-rhamnose ABC transporter, substrate-<br>binding component            | 2169 | 188531 | 189670 | 273.046532  | 308.165057 | 1.12862 |
| FOG: CheY-like receiver                                                          | 2170 | 189667 | 192240 | 98.32879907 | 57.7147299 | 0.58696 |
| Probable AAA family ATPase                                                       | 2168 | 192289 | 194463 | 57.26770929 | 14.4894204 | 0.25301 |
| Transcriptional regulator, DeoR family                                           | 2167 | 194466 | 195461 | 179.2547835 | 190.332326 | 1.0618  |
| hypothetical protein                                                             | 2166 | 195521 | 195832 | 356.9131833 | 311.093248 | 0.87162 |
| hypothetical protein                                                             | 2165 | 195786 | 196103 | 223.9747634 | 262.618297 | 1.17254 |
| hypothetical protein                                                             | 2164 | 196165 | 196338 | 69.36416185 | 117.052023 | 1.6875  |
| hypothetical protein                                                             | 2162 | 196530 | 196952 | 33.17535545 | 21.3270142 | 0.64286 |
| DNA-binding protein                                                              | 2161 | 197040 | 197372 | 28.61445783 | 6.77710843 | 0.23684 |
| hypothetical protein                                                             | 2160 | 197542 | 198585 | 1090.12464  | 1162.75168 | 1.06662 |
| Uncharacterized protein with a C-terminal OMP<br>(outer membrane protein) domain | 2159 | 198607 | 201048 | 370.7496927 | 329.065957 | 0.88757 |
| type 4 fimbrial biogenesis protein PilY1                                         | 2158 | 201060 | 204890 | 297.5195822 | 217.950392 | 0.73256 |
| hypothetical protein                                                             | 2157 | 204932 | 205552 | 62.90322581 | 61.6935484 | 0.98077 |
| hypothetical protein                                                             | 2156 | 205549 | 206211 | 39.27492447 | 33.9879154 | 0.86538 |
| ATPase                                                                           | 2155 | 206305 | 207774 | 35.73859769 | 13.7848877 | 0.38571 |
| hypothetical protein                                                             | 2154 | 207921 | 208061 | 25          | 0          | 0       |
| hypothetical protein                                                             | 2153 | 208027 | 212130 | 68.60833536 | 40.0316841 | 0.58348 |
| methyltransferase                                                                | 2152 | 212251 | 212916 | 6.015037594 | 3.38345865 | 0.5625  |
| sensory box histidine kinase/response regulator                                  | 2151 | 212956 | 215367 | 69.75772765 | 53.5714286 | 0.76796 |
| Mg-protoporphyrin IX monomethyl ester oxidative<br>cyclase                       | 2150 | 215475 | 216992 | 38.5629532  | 5.93276203 | 0.15385 |
| Putative 5'(3')-deoxyribonucleotidase (EC 3.1.3.-)                               | 2149 | 217019 | 217621 | 167.7852349 | 169.88255  | 1.0125  |
| Glycogen debranching enzyme (EC 3.2.1.-)                                         | 2148 | 217631 | 219787 | 160.7142857 | 146.103896 | 0.90909 |
| hypothetical protein                                                             | 2147 | 219829 | 220002 | 20.23121387 | 13.0057803 | 0.64286 |
| Hypothetical Cytosolic Protein                                                   | 2146 | 220006 | 220701 | 51.07913669 | 51.7985612 | 1.01408 |
| Leucyl/phenylalanyl-tRNA--protein transferase<br>(EC 2.3.2.6)                    | 2145 | 220904 | 221611 | 57.28429986 | 35.0070721 | 0.61111 |
| hypothetical protein                                                             | 2144 | 221633 | 223492 | 98.17105971 | 104.088219 | 1.06027 |
| LSU ribosomal protein L34p                                                       | 2143 | 223628 | 223783 | 619.3548387 | 1364.51613 | 2.20313 |

|                                                                     |      |        |        |             |            |         |
|---------------------------------------------------------------------|------|--------|--------|-------------|------------|---------|
| Ribonuclease P protein component (EC 3.1.26.5)                      | 2142 | 223803 | 224180 | 457.5596817 | 757.95756  | 1.65652 |
| YidD                                                                | 2141 | 224180 | 224398 | 160.5504587 | 340.59633  | 2.12143 |
| Oxal/YidC membrane insertion protein                                | 2140 | 224411 | 226258 | 174.0660531 | 309.420682 | 1.7776  |
| Jag protein                                                         | 2139 | 226281 | 227048 | 235.3324641 | 445.89309  | 1.89474 |
| hypothetical protein                                                | 2138 | 227092 | 227877 | 165.6050955 | 252.229299 | 1.52308 |
|                                                                     |      |        |        |             |            |         |
| sensory box histidine kinase/response regulator                     | 2137 | 227914 | 229914 | 113.5       | 169.875    | 1.4967  |
| hypothetical protein                                                | 2136 | 229935 | 230600 | 348.8721805 | 321.428571 | 0.92134 |
| Uracil permease                                                     | 2135 | 230614 | 231849 | 126.7206478 | 114.777328 | 0.90575 |
| Na <sup>+</sup> driven multidrug efflux pump                        | 2134 | 231946 | 233301 | 74.1697417  | 78.0442804 | 1.05224 |
| Zinc protease PqqL (EC 3.4.-.-)                                     | 2133 | 233301 | 236189 | 169.1481994 | 137.898199 | 0.81525 |
| Exopolyphosphatase-related protein                                  | 2132 | 236278 | 237195 | 701.1995638 | 1050.16358 | 1.49767 |
| polysaccharide deacetylase family protein                           | 2131 | 237224 | 238048 | 40.65533981 | 46.4199029 | 1.14179 |
| Ribosomal large subunit pseudouridine synthase D (EC 4.2.1.70)      | 2130 | 238050 | 238811 | 55.84756899 | 76.8725361 | 1.37647 |
|                                                                     |      |        |        |             |            |         |
| Predicted dehydrogenases and related proteins                       | 2129 | 238824 | 239915 | 88.45096242 | 65.9945005 | 0.74611 |
| Beta-glucosidase (EC 3.2.1.21)                                      | 2128 | 239970 | 241319 | 209.414381  | 228.502595 | 1.09115 |
| Acetyl xylan esterase 1; Cephalosporin-C deacetylase (EC 3.1.1.41)  | 2127 | 241358 | 242314 | 115.0627615 | 103.556485 | 0.9     |
|                                                                     |      |        |        |             |            |         |
| Orotate phosphoribosyltransferase (EC 2.4.2.10)                     | 2126 | 242355 | 242960 | 134.7107438 | 85.5371901 | 0.63497 |
| Dihydroorotate dehydrogenase, catalytic subunit (EC 1.3.3.1)        | 2125 | 243051 | 244010 | 64.65067779 | 56.3086548 | 0.87097 |
| Dihydroorotate dehydrogenase electron transfer subunit (EC 1.3.3.1) | 2124 | 244007 | 244765 | 104.2216359 | 112.796834 | 1.08228 |
| Carbon starvation protein A                                         | 2123 | 244890 | 246392 | 96.5379494  | 80.8921438 | 0.83793 |
| hypothetical protein                                                | 2122 | 246563 | 246775 | 4.716981132 | 0          | 0       |
| Orotidine 5'-phosphate decarboxylase (EC 4.1.1.23)                  | 2121 | 246805 | 247686 | 103.8592509 | 66.4018161 | 0.63934 |
| Aldo/keto reductase                                                 | 2120 | 247716 | 248873 | 68.71218669 | 91.4001729 | 1.33019 |
| hypothetical protein                                                | 2119 | 248884 | 249402 | 36.67953668 | 17.3745174 | 0.47368 |
| Dihydroorotase (EC 3.5.2.3)                                         | 2118 | 249418 | 250695 | 180.8927173 | 28.1910728 | 0.15584 |
| Aspartate carbamoyltransferase regulatory chain (pyrI)              | 2117 | 250702 | 251148 | 304.9327354 | 25.2242152 | 0.08272 |
| Aspartate carbamoyltransferase (EC 2.1.3.2)                         | 2116 | 251161 | 252084 | 297.3997833 | 29.2524377 | 0.09836 |
| hypothetical protein                                                | 2115 | 252210 | 252494 | 181.3380282 | 118.838028 | 0.65534 |
| Maltose/maltodextrin ABC transporter, permease protein MalG         | 2114 | 252627 | 253481 | 52.69320843 | 5.26932084 | 0.1     |
| Possible alpha-xyloside ABC transporter, permease component         | 2113 | 253495 | 254403 | 30.28634361 | 4.95594714 | 0.16364 |
| Multiple sugar ABC transporter, ATP-binding protein                 | 2112 | 254415 | 255557 | 29.77232925 | 13.7915937 | 0.46324 |
| hypothetical protein                                                | 2111 | 255559 | 256035 | 44.11764706 | 14.1806723 | 0.32143 |
| hypothetical protein                                                | 2110 | 256026 | 257318 | 32.12074303 | 10.4489164 | 0.3253  |
| Sugar ABC transporter, periplasmic sugar-binding protein USSDB1B    | 2109 | 257351 | 258661 | 117.5572519 | 42.9389313 | 0.36526 |
| hypothetical protein                                                | 2108 | 258856 | 259077 | 9.049773756 | 0          | 0       |
| Outer membrane autotransporter barrel                               | 2107 | 259158 | 261098 | 61.08247423 | 28.9948454 | 0.47468 |
| DNA-binding protein                                                 | 2106 | 261254 | 261583 | 53.19148936 | 27.3556231 | 0.51429 |
| Adenylate cyclase (EC 4.6.1.1)                                      | 2105 | 261622 | 262980 | 133.2842415 | 99.4108984 | 0.74586 |

|                                                                                                                                                            |      |        |        |             |            |         |
|------------------------------------------------------------------------------------------------------------------------------------------------------------|------|--------|--------|-------------|------------|---------|
| Two-component response regulator SA14-24                                                                                                                   | 2104 | 263050 | 263754 | 112.9261364 | 73.5085227 | 0.65094 |
| Two component system histidine kinase (EC 2.7.3.-)                                                                                                         | 2103 | 263751 | 265010 | 316.918189  | 287.728356 | 0.90789 |
| Outer membrane protein A precursor                                                                                                                         | 2102 | 265031 | 265948 | 2456.924755 | 2345.69248 | 0.95473 |
| hypothetical protein                                                                                                                                       | 2101 | 265908 | 266042 | 216.4179104 | 218.283582 | 1.00862 |
| Heavy-metal-associated domain (N-terminus) and membrane-bounded cytochrome biogenesis <i>cycZ</i> -like domain, possible membrane copper tolerance protein | 2100 | 266107 | 267864 | 42.97097325 | 11.5253273 | 0.26821 |
| Conserved domain protein                                                                                                                                   | 2099 | 267923 | 268399 | 42.01680672 | 28.3613445 | 0.675   |
| Copper-translocating P-type ATPase (EC 3.6.3.4)                                                                                                            | 2098 | 268400 | 270736 | 72.9880137  | 44.3065068 | 0.60704 |
| hypothetical protein                                                                                                                                       | 2097 | 270767 | 271438 | 119.9701937 | 103.949329 | 0.86646 |
| 2-dehydro-3-deoxygluconate kinase (EC 2.7.1.45)                                                                                                            | 2096 | 271451 | 272575 | 195.2846975 | 172.153025 | 0.88155 |
| hypothetical protein                                                                                                                                       | 2095 | 272591 | 273523 | 11.26609442 | 14.4849785 | 1.28571 |
| hypothetical protein                                                                                                                                       | 2094 | 273537 | 275093 | 74.55012853 | 43.3804627 | 0.5819  |
| hypothetical protein                                                                                                                                       | 2093 | 275154 | 276266 | 87.23021583 | 80.9352518 | 0.92784 |
| 6-phosphogluconate dehydrogenase, decarboxylating (EC 1.1.1.44)                                                                                            | 2092 | 276283 | 277734 | 153.6871123 | 179.875948 | 1.1704  |
| BNR repeat domain protein                                                                                                                                  | 2091 | 277731 | 278942 | 249.3806771 | 299.132948 | 1.1995  |
| DNA-3-methyladenine glycosylase (EC 3.2.2.20)                                                                                                              | 2090 | 279044 | 279622 | 66.60899654 | 38.9273356 | 0.58442 |
| hypothetical protein                                                                                                                                       | 2089 | 279626 | 280384 | 69.92084433 | 50.4617414 | 0.7217  |
| methanol dehydrogenase regulatory protein                                                                                                                  | 2088 | 280426 | 281379 | 89.19202518 | 49.5802728 | 0.55588 |
| Probable membrane protein                                                                                                                                  | 2087 | 281376 | 282638 | 55.07131537 | 26.7432647 | 0.48561 |
| hypothetical protein                                                                                                                                       | 2085 | 282625 | 284244 | 40.45707227 | 13.8974676 | 0.34351 |
| hypothetical protein                                                                                                                                       | 2086 | 284219 | 285463 | 38.98713826 | 12.6607717 | 0.32474 |
| Probable ABC transporter permease protein PH1216                                                                                                           | 2084 | 285475 | 286314 | 20.85816448 | 5.36352801 | 0.25714 |
| Multiple sugar ABC transporter, membrane-spanning permease protein MsmF                                                                                    | 2083 | 286325 | 287200 | 32.57142857 | 0          | 0       |
| probable ABC transporter, periplasmic solute-binding protein SMA2305                                                                                       | 2082 | 287307 | 288596 | 121.7998448 | 90.7680372 | 0.74522 |
| Mlc, transcriptional repressor of MalT (the transcriptional activator of maltose regulon) and manXYZ operon                                                | 2081 | 288645 | 289799 | 50.25996534 | 5.8492201  | 0.11638 |
| hypothetical protein                                                                                                                                       | 2080 | 289827 | 289955 | 11.71875    | 17.578125  | 1.5     |
| MoxR-like ATPases                                                                                                                                          | 2079 | 290076 | 291026 | 294.2105263 | 312.631579 | 1.06261 |
| hypothetical protein                                                                                                                                       | 2078 | 291094 | 292299 | 140.6639004 | 164.315353 | 1.16814 |
| Plasmid maintenance system antidote protein, XRE family                                                                                                    | 2077 | 292355 | 292777 | 2131.516588 | 4697.27488 | 2.20372 |
| Ribose operon repressor                                                                                                                                    | 2076 | 292944 | 293966 | 57.72994129 | 46.2328767 | 0.80085 |
| hypothetical protein                                                                                                                                       | 2075 | 294118 | 294270 | 49.34210526 | 59.2105263 | 1.2     |
| Alpha-rhamnosidase                                                                                                                                         | 2074 | 294316 | 296955 | 34.86169003 | 23.0200834 | 0.66033 |
| Multiple sugar ABC transporter, substrate-binding protein                                                                                                  | 2073 | 297069 | 298313 | 47.42765273 | 65.1125402 | 1.37288 |
| N-Acetyl-D-glucosamine ABC transport system, permease protein 1                                                                                            | 2072 | 298345 | 299241 | 38.50446429 | 12.5558036 | 0.32609 |
| N-Acetyl-D-glucosamine ABC transport system, permease protein 2                                                                                            | 2071 | 299290 | 300126 | 14.95215311 | 2.69138756 | 0.18    |
| Ribose 5-phosphate isomerase B (EC 5.3.1.6)                                                                                                                | 2070 | 300129 | 300743 | 58.63192182 | 62.2964169 | 1.0625  |

|                                                                                   |      |        |        |             |            |         |
|-----------------------------------------------------------------------------------|------|--------|--------|-------------|------------|---------|
| hypothetical protein                                                              | 2069 | 300781 | 301005 | 258.9285714 | 170.758929 | 0.65948 |
| Transglutaminase-like domain protein                                              | 2068 | 301064 | 304993 | 49.37643166 | 34.9325528 | 0.70747 |
| Integrase domain protein                                                          | 2067 | 305085 | 306320 | 46.96356275 | 18.2186235 | 0.38793 |
| Transcriptional regulator, MerR family, near polyamine transporter                | 2066 | 306493 | 307059 | 115.7243816 | 143.109541 | 1.23664 |
| 3-isopropylmalate dehydratase large subunit (EC 4.2.1.33)                         | 2065 | 307102 | 308385 | 52.2213562  | 99.9610288 | 1.91418 |
| 3-isopropylmalate dehydratase small subunit (EC 4.2.1.33)                         | 2064 | 308398 | 308922 | 35.30534351 | 38.6450382 | 1.09459 |
| Conserved protein                                                                 | 2063 | 308935 | 309345 | 60.97560976 | 60.3658537 | 0.99    |
| Chromate transport protein                                                        | 2062 | 309372 | 309923 | 46.27949183 | 44.9183303 | 0.97059 |
| Chromate transport protein                                                        | 2061 | 309920 | 310498 | 66.60899654 | 81.7474048 | 1.22727 |
| Aspartyl-tRNA synthetase (EC 6.1.1.12)                                            | 2060 | 310501 | 312369 | 207.9764454 | 233.672377 | 1.12355 |
| hypothetical protein                                                              | 2059 | 312413 | 313276 | 92.69988413 | 59.9652375 | 0.64688 |
| hypothetical protein                                                              | 2058 | 313314 | 314429 | 52.91479821 | 32.2869955 | 0.61017 |
| Hydroxyacylglutathione hydrolase (EC 3.1.2.6)                                     | 2057 | 314477 | 315058 | 320.9982788 | 329.173838 | 1.02547 |
| hypothetical protein                                                              | 2056 | 315224 | 315460 | 2902.542373 | 3613.34746 | 1.24489 |
| Ser/Thr protein phosphatase family protein                                        | 2055 | 315543 | 316412 | 66.16800921 | 59.5512083 | 0.9     |
| Tryptophan synthase beta chain like (EC 4.2.1.20)                                 | 2054 | 316557 | 317945 | 292.1469741 | 269.092219 | 0.92109 |
| hypothetical protein                                                              | 2053 | 318014 | 318427 | 290.5569007 | 495.762712 | 1.70625 |
| Chemotaxis response regulator protein-glutamate methylesterase CheB (EC 3.1.1.61) | 2052 | 318757 | 319899 | 608.5814361 | 606.830123 | 0.99712 |
| Chemotaxis protein methyltransferase CheR (EC 2.1.1.80)                           | 2051 | 319919 | 320728 | 386.8974042 | 481.149567 | 1.24361 |
| hypothetical protein                                                              | 2050 | 320825 | 321022 | 144.6700508 | 194.162437 | 1.34211 |
| CDP-diacylglycerol--serine O-phosphatidyltransferase (EC 2.7.8.8)                 | 2049 | 321019 | 321831 | 139.7783251 | 108.066502 | 0.77313 |
| Phosphatidylserine decarboxylase (EC 4.1.1.65)                                    | 2048 | 321828 | 322469 | 119.3447738 | 136.895476 | 1.14706 |
| hypothetical protein                                                              | 2047 | 322456 | 323118 | 61.93353474 | 44.18429   | 0.71341 |
| COG1272: Predicted membrane protein hemolysin III homolog                         | 2046 | 323265 | 324098 | 123.0492197 | 78.3313325 | 0.63659 |
| 3-oxoacyl-[acyl-carrier protein] reductase (EC 1.1.1.100)                         | 2045 | 324125 | 324880 | 217.8807947 | 125.165563 | 0.57447 |
| Permeases of the major facilitator superfamily                                    |      | 324919 | 325260 | 95.30791789 | 92.3753666 | 0.96923 |
| Permeases of the major facilitator superfamily                                    |      | 325269 | 326123 | 52.69320843 | 36.8852459 | 0.7     |
| Sensory box histidine kinase/response regulator                                   | 2042 | 326130 | 328313 | 215.3704556 | 261.965025 | 1.21635 |
| hypothetical protein                                                              | 2041 | 328323 | 329474 | 193.3101651 | 228.714162 | 1.18315 |
| Serine hydroxymethyltransferase (EC 2.1.2.1)                                      | 2040 | 329602 | 331137 | 240.0651466 | 297.557003 | 1.23948 |
| hypothetical protein                                                              | 2039 | 331304 | 331888 | 76.19863014 | 50.0856164 | 0.6573  |
| Uncharacterized protein TP_0836                                                   | 2038 | 331889 | 332641 | 57.18085106 | 38.8962766 | 0.68023 |
| Thiamin-phosphate pyrophosphorylase (EC 2.5.1.3)                                  | 2037 | 332638 | 333318 | 122.0588235 | 79.4117647 | 0.6506  |
| Thiazole biosynthesis protein ThiH                                                | 2036 | 333333 | 334493 | 125         | 104.741379 | 0.83793 |
| Thiazole biosynthesis protein ThiG                                                | 2035 | 334486 | 335463 | 127.9426817 | 99.0276356 | 0.774   |
| Uncharacterized conserved protein                                                 | 2034 | 335534 | 336724 | 203.3613445 | 236.344538 | 1.16219 |
| Sensory box histidine kinase/response regulator                                   | 2033 | 336745 | 338835 | 221.0526316 | 236.842105 | 1.07143 |
| Acyl-ACP thioesterase                                                             | 2032 | 338851 | 339720 | 95.51208285 | 85.443038  | 0.89458 |
| Sugar phosphate isomerases/epimerases                                             | 2031 | 339703 | 340464 | 112.3521682 | 88.6990802 | 0.78947 |

|                                                                                     |      |        |        |             |            |         |
|-------------------------------------------------------------------------------------|------|--------|--------|-------------|------------|---------|
| Methyl-accepting chemotaxis protein                                                 | 2030 | 340512 | 342332 | 172.5274725 | 217.582418 | 1.26115 |
| Nitroreductase family protein                                                       | 2029 | 342344 | 342913 | 204.745167  | 217.486819 | 1.06223 |
| hypothetical protein                                                                | 2028 | 343200 | 344282 | 108.5951941 | 135.166359 | 1.24468 |
| Alpha-mannosidase (EC 3.2.1.24)                                                     | 2027 | 344303 | 347500 | 116.5154833 | 228.026275 | 1.95705 |
| N-Acetyl-D-glucosamine ABC transport system, permease protein 2                     | 2026 | 347552 | 348424 | 32.68348624 | 46.4449541 | 1.42105 |
| Sugar ABC transporter permease                                                      | 2025 | 348436 | 349332 | 66.96428571 | 77.8459821 | 1.1625  |
| Sugar ABC transporter, sugar-binding protein                                        | 2024 | 349441 | 350781 | 1961.19403  | 3230.59701 | 1.64726 |
| sugar-binding transcriptional regulator, GntR family                                | 2023 | 350916 | 351995 | 69.50880445 | 43.7905468 | 0.63    |
| Metallo-beta-lactamase family protein, RNA-specific                                 | 2022 | 352130 | 353539 | 186.3023421 | 142.122072 | 0.76286 |
| rRNA methylases                                                                     | 2021 | 353581 | 354309 | 230.7692308 | 188.53022  | 0.81696 |
| Aminoglycoside 6-adenylyltransferase (EC 2.7.7.-)                                   | 2020 | 354311 | 355156 | 47.92899408 | 37.2781065 | 0.77778 |
| hypothetical protein                                                                | 2019 | 355184 | 355306 | 12.29508197 | 0          | 0       |
| Phosphomethylpyrimidine kinase (EC 2.7.4.7)                                         | 2018 | 355326 | 356141 | 472.392638  | 472.08589  | 0.99935 |
| Integrase domain protein                                                            | 2017 | 356321 | 357556 | 52.22672065 | 23.6842105 | 0.45349 |
| Ribose ABC transport system, periplasmic ribose-binding protein RbsB (TC 3.A.1.2.1) | 2015 | 357956 | 358900 | 2026.483051 | 2423.99364 | 1.19616 |
| Ribose ABC transport system, permease protein RbsC (TC 3.A.1.2.1)                   | 2014 | 358953 | 359984 | 290.9796314 | 384.093113 | 1.32    |
| Ribose ABC transport system, ATP-binding protein RbsA (TC 3.A.1.2.1)                | 2013 | 359994 | 361496 | 214.0479361 | 301.098535 | 1.40669 |
| Endo-beta-N-acetylglucosaminidase (EC 3.2.1.96)                                     | 2012 | 361587 | 362876 | 240.8844065 | 188.518231 | 0.78261 |
| Dipeptide transport ATP-binding protein dppF (TC 3.A.1.5.2)                         |      | 362916 | 363683 | 32.67973856 | 0          | 0       |
| Dipeptide transport ATP-binding protein dppD (TC 3.A.1.5.2)                         |      | 363680 | 364504 | 31.55339806 | 8.19174757 | 0.25962 |
| Binding-protein-dependent transport systems inner membrane component                | 2009 | 364501 | 365313 | 29.55665025 | 2.77093596 | 0.09375 |
| Dipeptide transport system permease protein dppB (TC 3.A.1.5.2)                     |      | 365412 | 366263 | 49.94124559 | 10.5757932 | 0.21176 |
| ABC transporter, periplasmic substrate-binding protein                              | 2007 | 366260 | 367774 | 123.5138705 | 29.7225892 | 0.24064 |
| Alcohol dehydrogenase (EC 1.1.1.1); Acetaldehyde dehydrogenase (EC 1.2.1.10)        | 2006 | 368078 | 370699 | 1043.304082 | 525.371995 | 0.50357 |
| hypothetical protein                                                                | 2005 | 370696 | 371445 | 1176.902537 | 549.732977 | 0.4671  |
| Periplasmic [Fe] hydrogenase large subunit (EC 1.12.7.2)                            | 2004 | 371525 | 371701 | 500         | 281.25     | 0.5625  |
| Periplasmic [Fe] hydrogenase (EC 1.12.7.2)                                          | 2003 | 371722 | 373449 | 541.1117545 | 282.715692 | 0.52247 |
| Periplasmic [Fe] hydrogenase (EC 1.12.7.2)                                          | 2002 | 373458 | 374975 | 246.5392221 | 137.936717 | 0.55949 |
| hypothetical protein                                                                | 2001 | 374950 | 376203 | 307.2625698 | 166.999202 | 0.54351 |
| Periplasmic [Fe] hydrogenase large subunit (EC 1.12.7.2)                            | 2000 | 376215 | 376460 | 63.26530612 | 45.9183673 | 0.72581 |
| Redox-sensitive transcriptional regulator (AT-rich DNA-binding protein)             | 1999 | 376355 | 377083 | 177.1978022 | 89.6291209 | 0.50581 |
| Multiple polyol-specific dehydrogenase (EC 1.1.1.-)                                 | 1998 | 377087 | 378619 | 257.8328982 | 126.305483 | 0.48987 |
| hypothetical protein                                                                | 1997 | 378636 | 378839 | 68.96551724 | 44.3349754 | 0.64286 |
| hypothetical protein                                                                | 1996 | 379065 | 379457 | 63.7755102  | 45.9183673 | 0.72    |



|                                                                        |      |        |        |             |            |         |
|------------------------------------------------------------------------|------|--------|--------|-------------|------------|---------|
| ABC transporter, ATP-binding protein                                   | 1994 | 379450 | 380223 | 74.385511   | 58.2147477 | 0.78261 |
| hypothetical protein                                                   | 1995 | 380204 | 380326 | 0           | 0          | #DIV/0! |
| ABC transporter, permease protein                                      | 1993 | 380220 | 381047 | 41.71704958 | 40.8101572 | 0.97826 |
| Na <sup>+</sup> /H <sup>+</sup> antiporter                             |      | 381072 | 382358 | 19.44012442 | 10.4976672 | 0.54    |
| Na <sup>+</sup> /H <sup>+</sup> antiporter                             |      | 382436 | 383065 | 22.25755167 | 10.7313196 | 0.48214 |
| DNA-directed RNA polymerase specialized sigma subunit, sigma24 homolog | 1990 | 383071 | 383628 | 39.497307   | 8.07899461 | 0.20455 |
| Predicted membrane protein                                             | 1989 | 383675 | 384439 | 31.41361257 | 32.395288  | 1.03125 |
| Uncharacterized protein TP_0073                                        |      | 384496 | 385755 | 69.2124105  | 73.3890215 | 1.06034 |
| Uncharacterized protein TP_0073                                        |      | 385727 | 385996 | 65.05576208 | 100.371747 | 1.54286 |
| hypothetical protein                                                   | 1986 | 386122 | 387522 | 77.85714286 | 32.1428571 | 0.41284 |
| Hypothetical protein ybgl                                              | 1985 | 387530 | 388300 | 118.8311688 | 111.038961 | 0.93443 |
| Lipoprotein signal peptidase (EC 3.4.23.36)                            | 1984 | 388314 | 388850 | 176.3059701 | 226.679104 | 1.28571 |
| hypothetical protein                                                   | 1983 | 388834 | 389124 | 151.7241379 | 147.413793 | 0.97159 |
| hydrolase, putative                                                    | 1982 | 389158 | 390000 | 7.125890736 | 0          | 0       |
| hypothetical protein                                                   |      | 390240 | 390422 | 68.68131868 | 61.8131868 | 0.9     |
| hypothetical protein                                                   | 1980 | 390506 | 390667 | 27.95031056 | 13.9751553 | 0.5     |
| Protein of unknown function DUF262 family                              | 1979 | 390700 | 392055 | 12.91512915 | 1.66051661 | 0.12857 |
| Protein of unknown function DUF262 family                              | 1978 | 392045 | 393886 | 7.061379685 | 1.22216187 | 0.17308 |
| hypothetical protein                                                   | 1977 | 393933 | 394124 | 28.79581152 | 23.5602094 | 0.81818 |
| hypothetical protein                                                   | 1976 | 394198 | 395871 | 164.6706587 | 173.802395 | 1.05545 |
| hypothetical protein                                                   | 1975 | 395916 | 396086 | 38.23529412 | 0          | 0       |
| Probable AAA family ATPase                                             | 1973 | 396132 | 397847 | 58.89212828 | 48.5422741 | 0.82426 |
| Xylulose kinase (EC 2.7.1.17)                                          | 1974 | 397844 | 399229 | 70.75812274 | 61.732852  | 0.87245 |
| Endonuclease/exonuclease/phosphatase family protein                    | 1972 | 399357 | 400457 | 53.63636364 | 12.2727273 | 0.22881 |
| Transcriptional regulator, DeoR family                                 | 1971 | 400460 | 401221 | 219.4480946 | 476.018397 | 2.16916 |
| Nitroreductase                                                         | 1970 | 401424 | 401948 | 6234.732824 | 8321.56489 | 1.33471 |
| Threonyl-tRNA synthetase (EC 6.1.1.3)                                  | 1969 | 401992 | 403776 | 864.9103139 | 276.205157 | 0.31935 |
| hypothetical protein                                                   | 1968 | 403775 | 403903 | 640.625     | 386.71875  | 0.60366 |
| plasmid stability protein                                              | 1967 | 404462 | 404884 | 93.60189573 | 58.6492891 | 0.62658 |
| 6-phospho-3-hexuloisomerase                                            | 1966 | 404894 | 405463 | 84.35852373 | 63.2688928 | 0.75    |
| ABC transporter, permease protein                                      | 1965 | 405501 | 408662 | 49.03511547 | 18.5068016 | 0.37742 |
| ABC transporter, ATP-binding protein                                   | 1964 | 408652 | 409353 | 89.87161198 | 38.5164051 | 0.42857 |
| Glycosyltransferase                                                    | 1963 | 409367 | 410578 | 39.63666391 | 29.7274979 | 0.75    |
| hypothetical protein                                                   | 1962 | 410596 | 411330 | 47.0027248  | 24.5231608 | 0.52174 |
| hypothetical protein                                                   | 1961 | 411359 | 411622 | 11.40684411 | 0          | 0       |
| Calcium-binding acidic-repeat protein precursor                        |      | 411623 | 412969 | 22.65973254 | 3.34323923 | 0.14754 |
| Adenylate cyclase (EC 4.6.1.1)                                         | 1959 | 412985 | 415642 | 25.59277381 | 0          | 0       |
| hypothetical protein                                                   | 1958 | 415639 | 416046 | 54.05405405 | 11.0565111 | 0.20455 |
| Calcium-binding acidic-repeat protein precursor                        | 1957 | 416079 | 417953 | 33.92094017 | 6.00961538 | 0.17717 |
| hypothetical protein                                                   | 1956 | 418020 | 419696 | 29.23627685 | 6.7124105  | 0.22959 |
| Integrase domain protein                                               | 1955 | 420125 | 421360 | 43.72469636 | 14.5748988 | 0.33333 |
| hypothetical protein                                                   | 1954 | 421513 | 421878 | 121.8836565 | 43.6288089 | 0.35795 |
| hypothetical protein                                                   | 1953 | 422141 | 422290 | 22.72727273 | 17.0454545 | 0.75    |
| hypothetical protein                                                   | 1952 | 422711 | 422863 | 6.578947368 | 0          | 0       |
| hypothetical protein                                                   | 1951 | 423305 | 423448 | 13.98601399 | 0          | 0       |
| putative DNA primase/helicase                                          | 1950 | 423743 | 425137 | 35.48153512 | 6.51701665 | 0.18367 |
| hypothetical protein                                                   | 1949 | 425137 | 425472 | 37.31343284 | 0          | 0       |
| hypothetical protein                                                   | 1948 | 425664 | 425954 | 18.90756303 | 0          | 0       |

|                                                                |      |        |        |             |            |         |
|----------------------------------------------------------------|------|--------|--------|-------------|------------|---------|
| hypothetical protein                                           | 1947 | 425965 | 427755 | 24.29514097 | 6.74865027 | 0.27778 |
| hypothetical protein                                           | 1946 | 427752 | 428303 | 34.43113772 | 6.73652695 | 0.19565 |
| hypothetical protein                                           | 1945 | 428304 | 428585 | 11.9047619  | 0          | 0       |
| hypothetical protein                                           | 1944 | 428545 | 428832 | 11.96172249 | 0          | 0       |
| hypothetical protein                                           | 1943 | 428825 | 429091 | 41.26213592 | 0          | 0       |
| hypothetical protein                                           | 1942 | 429110 | 429283 | 43.35260116 | 0          | 0       |
| Cell wall-associated hydrolases (invasion-associated proteins) | 1941 | 429286 | 429810 | 28.43601896 | 5.33175355 | 0.1875  |
| hypothetical protein                                           | 1940 | 429814 | 430071 | 41.83266932 | 0          | 0       |
| hypothetical protein                                           | 1939 | 430081 | 431577 | 38.77005348 | 1.5040107  | 0.03879 |
| hypothetical protein                                           | 1938 | 431574 | 432434 | 32.23140496 | 0          | 0       |
| hypothetical protein                                           | 1937 | 432431 | 432895 | 23.33333333 | 0          | 0       |
| hypothetical protein                                           | 1936 | 432892 | 433494 | 25.40650407 | 4.57317073 | 0.18    |
| 37-kD nucleoid-associated bacterial protein                    | 1935 | 433830 | 434858 | 18.48249027 | 0          | 0       |
| putative phage-related membrane protein                        | 1934 | 434846 | 436051 | 8.713692946 | 3.73443983 | 0.42857 |
| hypothetical protein                                           | 1933 | 436325 | 436561 | 90.90909091 | 61.3636364 | 0.675   |
| hypothetical protein                                           | 1932 | 436558 | 437040 | 107.8838174 | 107.365145 | 0.99519 |
| hypothetical protein                                           | 1931 | 437140 | 437313 | 0           | 14.8026316 | #DIV/0! |
| hypothetical protein                                           | 1930 | 437899 | 438171 | 82.72058824 | 223.345588 | 2.7     |
| Putative membrane protein                                      | 1929 | 438267 | 439148 | 15.32349603 | 2.553916   | 0.16667 |
| sensor histidine kinase                                        | 1928 | 439502 | 440656 | 25.12998267 | 7.79896014 | 0.31034 |
| DNA-binding response regulator                                 | 1927 | 440669 | 441361 | 21.67630058 | 13.0057803 | 0.6     |
| hypothetical protein                                           | 1926 | 441351 | 441464 | 17.69911504 | 0          | 0       |
| helix-turn-helix, Fis-type                                     | 1925 | 441769 | 443046 | 165.6225529 | 137.43148  | 0.82979 |
| hypothetical protein                                           | 1924 | 443142 | 443390 | 16.73640167 | 9.41422594 | 0.5625  |
| hypothetical protein                                           | 1922 | 443534 | 443815 | 320.2846975 | 296.263345 | 0.925   |
| hypothetical protein                                           | 1923 | 443808 | 444290 | 3.112033195 | 0          | 0       |
| hypothetical protein                                           | 1921 | 444481 | 445380 | 3.337041157 | 2.50278087 | 0.75    |
| Transcriptional regulator, Cro/C1 family                       | 1920 | 445381 | 445740 | 54.31754875 | 37.6044568 | 0.69231 |
| hypothetical protein                                           | 1919 | 445838 | 446044 | 109.223301  | 76.4563107 | 0.7     |
| hypothetical protein                                           | 1918 | 446124 | 446402 | 71.94244604 | 40.4676259 | 0.5625  |
| hypothetical protein                                           | 1917 | 446613 | 446726 | 13.27433628 | 0          | 0       |
| hypothetical protein                                           | 1916 | 446888 | 447259 | 40.43126685 | 0          | 0       |
| hypothetical protein                                           | 1915 | 447306 | 447563 | 13.61867704 | 0          | 0       |
| hypothetical protein                                           | 1914 | 447575 | 448081 | 20.75098814 | 0          | 0       |
| Major capsid protein, HK97 family                              | 1913 | 448145 | 449452 | 36.58536585 | 15.9323367 | 0.43548 |
| hypothetical protein                                           | 1912 | 449511 | 450173 | 42.29607251 | 0          | 0       |
| DNA-binding response regulator, LuxR family                    | 1911 | 450186 | 450836 | 23.07692308 | 0          | 0       |
| Portal protein                                                 | 1910 | 450829 | 452076 | 26.65589661 | 3.63489499 | 0.13636 |
| Phage DNA Packaging Protein                                    | 1909 | 452073 | 453296 | 25.49342105 | 0          | 0       |
| hypothetical protein                                           | 1908 | 453299 | 453841 | 43.35793358 | 0          | 0       |
| hypothetical protein                                           | 1907 | 453828 | 453965 | 47.44525547 | 0          | 0       |
| hypothetical protein                                           | 1905 | 454426 | 454584 | 47.46835443 | 14.2405063 | 0.3     |
| Integrase                                                      | 1906 | 454581 | 455972 | 32.35082674 | 3.23508267 | 0.1     |
| Long-chain-fatty-acid--CoA ligase (EC 6.2.1.3)                 | 1903 | 456411 | 458345 | 231.1271975 | 324.58635  | 1.40436 |
| Molybdopterin-guanine dinucleotide biosynthesis protein B      | 1904 | 458327 | 458845 | 65.63706564 | 117.277992 | 1.78676 |
| 4-hydroxybenzoyl-CoA thioesterase family active site           | 1901 | 458901 | 459302 | 182.0448878 | 252.493766 | 1.38699 |
| D-alanine--D-alanine ligase (EC 6.3.2.4)                       | 1902 | 459299 | 460396 | 138.1039198 | 164.083865 | 1.18812 |
| Fatty acid degradation regulator YsiA, TetR family             | 1900 | 460499 | 461113 | 90.39087948 | 65.9609121 | 0.72973 |

|                                                                                          |      |        |        |             |            |         |
|------------------------------------------------------------------------------------------|------|--------|--------|-------------|------------|---------|
| Methyltransferase (EC 2.1.1.-); N6-adenine-specific DNA methylase                        | 1899 | 461122 | 462279 | 207.8651685 | 210.025929 | 1.0104  |
| Pyrophosphate--fructose 6-phosphate 1-phosphotransferase, alpha subunit (EC 2.7.1.90)    | 1898 | 462380 | 463723 | 357.7810871 | 464.072971 | 1.29709 |
| hypothetical protein                                                                     | 1897 | 463740 | 465032 | 167.5696594 | 193.304954 | 1.15358 |
| hypothetical protein                                                                     | 1896 | 465091 | 465339 | 36.29032258 | 27.2177419 | 0.75    |
| hypothetical protein                                                                     | 1895 | 465492 | 465626 | 7.462686567 | 0          | 0       |
| hypothetical protein                                                                     | 1894 | 465709 | 466233 | 40.07633588 | 72.9961832 | 1.82143 |
| hypothetical protein                                                                     | 1893 | 466238 | 466972 | 39.50953678 | 42.9155313 | 1.08621 |
| NADH-dependent dehydrogenase                                                             | 1891 | 467019 | 468107 | 450.8272059 | 390.854779 | 0.86697 |
| hypothetical tRNA/rRNA methyltransferase yfiF [EC:2.1.1.-]                               | 1892 | 468104 | 468889 | 129.9363057 | 117.515924 | 0.90441 |
| Alanyl-tRNA synthetase family protein                                                    | 1890 | 468934 | 470145 | 155.2436003 | 113.336086 | 0.73005 |
| hypothetical protein                                                                     | 1889 | 470182 | 470847 | 72.18045113 | 47.3684211 | 0.65625 |
| Mce family protein                                                                       | 1888 | 470866 | 472326 | 120.890411  | 103.253425 | 0.85411 |
| Methionine ABC transporter ATP-binding protein                                           | 1887 | 472323 | 473075 | 85.7712766  | 47.8723404 | 0.55814 |
| ABC-type transport system involved in resistance to organic solvents, permease component | 1886 | 473072 | 473836 | 64.13612565 | 41.2303665 | 0.64286 |
| Proline-rich protein                                                                     | 1885 | 473925 | 474788 | 205.0984936 | 284.183082 | 1.38559 |
| hypothetical protein                                                                     | 1884 | 474913 | 475209 | 94.59459459 | 114.02027  | 1.20536 |
| B. burgdorferi predicted coding region BB0418                                            | 1883 | 475512 | 476522 | 167.8217822 | 189.356436 | 1.12832 |
| Membrane proteins related to metalloendopeptidases                                       | 1882 | 476643 | 477686 | 424.2569511 | 526.366251 | 1.24068 |
| hypothetical protein                                                                     | 1881 | 477694 | 478140 | 329.5964126 | 479.26009  | 1.45408 |
| UDP-N-acetylenolpyruvoylglucosamine reductase (EC 1.1.1.158)                             | 1880 | 478172 | 478711 | 121.5213358 | 146.103896 | 1.20229 |
| Signal peptidase-like protein                                                            | 1878 | 478704 | 479669 | 217.0301142 | 226.635514 | 1.04426 |
| Transcriptional regulator, ArsR family                                                   | 1879 | 479644 | 479934 | 74.13793103 | 77.5862069 | 1.04651 |
| hypothetical protein                                                                     | 1877 | 479928 | 480137 | 4.784688995 | 0          | 0       |
| Helix-turn-helix domain protein                                                          | 1876 | 480217 | 480540 | 201.2383901 | 202.012384 | 1.00385 |
| CTP synthase (EC 6.3.4.2)                                                                | 1875 | 480590 | 482224 | 223.9358421 | 306.755089 | 1.36983 |
| hypothetical protein                                                                     | 1874 | 482226 | 482834 | 203.125     | 325.657895 | 1.60324 |
| Lipopolysaccharide ABC transporter, ATP-binding protein LptB                             | 1873 | 482836 | 483588 | 105.0531915 | 116.68883  | 1.11076 |
| Periplasmic sugar-binding proteins                                                       | 1872 | 483585 | 484562 | 64.48311157 | 27.6356192 | 0.42857 |
| two-component sensor histidine kinase                                                    | 1871 | 484559 | 486079 | 49.67105263 | 31.0855263 | 0.62583 |
| DNA-binding response regulator                                                           | 1870 | 486064 | 487572 | 38.12997347 | 26.8567639 | 0.70435 |
| L-arabinose-binding periplasmic protein precursor araF (TC 3.A.1.2.2)                    | 1869 | 487725 | 488873 | 8839.368617 | 10203.3426 | 1.15431 |
| L-arabinose transport ATP-binding protein araG (TC 3.A.1.2.2)                            | 1868 | 489002 | 490528 | 521.0740993 | 746.430999 | 1.43249 |
| L-arabinose transport system permease protein (TC 3.A.1.2.2)                             | 1867 | 490540 | 491733 | 302.3156089 | 360.849057 | 1.19362 |
| Uroporphyrinogen decarboxylase (EC 4.1.1.37)                                             | 1866 | 491752 | 492753 | 262.2377622 | 352.897103 | 1.34571 |
| Xylose ABC transporter, periplasmic xylose-binding protein xylF                          | 1865 | 492814 | 493920 | 110.7594937 | 122.061483 | 1.10204 |
| Alpha-glucosidase (EC 3.2.1.20)                                                          |      | 494758 | 495849 | 47.66269478 | 26.8102658 | 0.5625  |
| Glucan 1,6-alpha-glucosidase (EC 3.2.1.70)                                               |      | 495878 | 496459 | 33.56282272 | 50.3442341 | 1.5     |

|                                                                                                            |      |        |        |             |            |         |
|------------------------------------------------------------------------------------------------------------|------|--------|--------|-------------|------------|---------|
| Multi antimicrobial extrusion protein (Na <sup>+</sup> )/drug antiporter), MATE family of MDR efflux pumps | 1862 | 496463 | 497836 | 66.27822287 | 39.3299345 | 0.59341 |
| hypothetical protein                                                                                       | 1861 | 497889 | 498197 | 76.2987013  | 58.4415584 | 0.76596 |
| Integrase domain protein                                                                                   | 1860 | 498325 | 499560 | 39.27125506 | 5.46558704 | 0.13918 |
| hypothetical protein                                                                                       | 1859 | 499708 | 501207 | 69.04603069 | 37.5250167 | 0.54348 |
| hypothetical protein                                                                                       | 1858 | 501217 | 501825 | 69.90131579 | 40.7072368 | 0.58235 |
| MukB N-terminal domain/M protein repeat protein                                                            | 1857 | 501822 | 505034 | 42.96388543 | 23.1164384 | 0.53804 |
| hypothetical protein                                                                                       | 1856 | 505031 | 506257 | 42.82218597 | 9.17618271 | 0.21429 |
| Transcriptional regulator                                                                                  | 1855 | 506293 | 506880 | 34.07155026 | 15.3321976 | 0.45    |
| Multi antimicrobial extrusion protein (Na <sup>+</sup> )/drug antiporter), MATE family of MDR efflux pumps | 1854 | 506877 | 508223 | 27.90178571 | 8.37053571 | 0.3     |
| sensory box histidine kinase/response regulator diguanylate cyclase (GGDEF domain) with PAS/PAC sensor     | 1852 | 508377 | 509798 | 36.94581281 | 17.4173118 | 0.47143 |
|                                                                                                            |      | 509795 | 510850 | 91.46919431 | 110.900474 | 1.21244 |
| sensory box histidine kinase/response regulator hypothetical protein                                       | 1851 | 510831 | 512555 | 86.13689095 | 66.5603248 | 0.77273 |
| hypothetical protein                                                                                       | 1849 | 512776 | 513678 | 78.15964523 | 52.383592  | 0.67021 |
| hypothetical protein                                                                                       | 1850 | 513667 | 513825 | 25.3164557  | 28.4810127 | 1.125   |
| Oxaloacetate decarboxylase beta chain (EC 4.1.1.3)                                                         | 1848 | 513835 | 514974 | 101.8437226 | 114.574188 | 1.125   |
| hypothetical protein                                                                                       | 1846 | 515041 | 515412 | 397.574124  | 436.657682 | 1.09831 |
| hypothetical protein                                                                                       | 1847 | 515405 | 515527 | 61.47540984 | 55.3278689 | 0.9     |
| TRNA/rRNA methyltransferase                                                                                | 1845 | 515481 | 516287 | 96.77419355 | 72.5806452 | 0.75    |
| DinB family protein                                                                                        | 1844 | 516308 | 516826 | 37.64478764 | 34.7490347 | 0.92308 |
| Beta-galactosidase (EC 3.2.1.23)                                                                           | 1843 | 516907 | 518958 | 35.59239395 | 10.9702584 | 0.30822 |
| Maltose/maltodextrin ABC transporter, permease protein MalG                                                | 1842 | 518972 | 519856 | 7.918552036 | 2.54524887 | 0.32143 |
| Possible alpha-xyloside ABC transporter, permease component                                                | 1841 | 519853 | 520800 | 28.51108765 | 4.75184794 | 0.16667 |
| ABC-type sugar transport system, periplasmic component                                                     | 1840 | 520862 | 522199 | 74.42034405 | 80.7778609 | 1.08543 |
| Beta-galactosidase (EC 3.2.1.23)                                                                           | 1839 | 522258 | 525533 | 34.35114504 | 20.610687  | 0.6     |
| MSM (multiple sugar metabolism) operon regulatory protein                                                  | 1838 | 525697 | 526722 | 32.19512195 | 19.7560976 | 0.61364 |
| PUTATIVE ZINC PROTEASE PROTEIN                                                                             | 1837 | 526726 | 527820 | 79.06764168 | 63.7568556 | 0.80636 |
| hypothetical protein                                                                                       | 1836 | 527839 | 528609 | 458.4415584 | 391.558442 | 0.85411 |
| Aldehyde dehydrogenase B (EC 1.2.1.22)                                                                     | 1835 | 528694 | 530175 | 36.12424038 | 15.1924375 | 0.42056 |
| Methyl-accepting chemotaxis protein                                                                        | 1834 | 530312 | 532423 | 213.8796779 | 293.107532 | 1.37043 |
| hypothetical protein                                                                                       | 1833 | 532481 | 532933 | 117.2566372 | 84.6238938 | 0.7217  |
| Tetrapyrrole (Corrin-Porphyrin) methylase family protein UPF0011                                           | 1832 | 532935 | 533639 | 178.2670455 | 150.213068 | 0.84263 |
| hypothetical protein                                                                                       | 1831 | 533676 | 533960 | 1394.366197 | 1584.50704 | 1.13636 |
| Alcohol dehydrogenase (EC 1.1.1.1)                                                                         | 1830 | 534035 | 535180 | 134.9344978 | 149.344978 | 1.1068  |
| hypothetical protein                                                                                       | 1829 | 535195 | 535326 | 41.98473282 | 34.351145  | 0.81818 |
| hypothetical protein                                                                                       | 1828 | 535281 | 536429 | 115.4181185 | 117.595819 | 1.01887 |
| hypothetical protein                                                                                       | 1827 | 536464 | 536607 | 10.48951049 | 31.4685315 | 3       |
| sensory box histidine kinase/response regulator                                                            | 1826 | 537864 | 539819 | 176.6275347 | 188.500534 | 1.06722 |

|                                                                                |      |        |        |             |            |         |
|--------------------------------------------------------------------------------|------|--------|--------|-------------|------------|---------|
| Lysyl-tRNA synthetase (class I) (EC 6.1.1.6)                                   | 1825 | 539910 | 541538 | 166.1528977 | 196.979038 | 1.18553 |
| Myo-inositol 2-dehydrogenase (EC 1.1.1.18)                                     |      | 541561 | 542559 | 79.15831663 | 65.3807615 | 0.82595 |
| Beta-mannosidase (EC 3.2.1.25)                                                 | 1823 | 542566 | 545016 | 191.6326531 | 180        | 0.9393  |
| hypothetical protein                                                           |      | 545133 | 545378 | 202.0408163 | 211.22449  | 1.04545 |
| Ferrous iron transport protein B                                               | 1821 | 545375 | 547450 | 95.96695821 | 95.1166181 | 0.99114 |
| Putative RNA 2'-O-ribose methyltransferase mtfA (EC 2.1.1.-)                   | 1820 | 547453 | 548394 | 99.36238045 | 124.335813 | 1.25134 |
| hypothetical protein                                                           | 1819 | 548391 | 548795 | 233.9108911 | 317.450495 | 1.35714 |
| Transcriptional regulator, MerR family                                         | 1818 | 548839 | 549423 | 214.8972603 | 331.335616 | 1.54183 |
| Long-chain-fatty-acid--CoA ligase (EC 6.2.1.3)                                 | 1817 | 549444 | 551093 | 229.2298363 | 290.630685 | 1.26786 |
| hypothetical protein                                                           | 1816 | 551097 | 551216 | 281.512605  | 189.07563  | 0.67164 |
| 2-oxoglutarate oxidoreductase, gamma subunit (EC 1.2.7.3)                      | 1815 | 551327 | 551860 | 380.8630394 | 346.153846 | 0.90887 |
| 2-oxoglutarate oxidoreductase, beta subunit (EC 1.2.7.3)                       | 1814 | 551857 | 552627 | 485.0649351 | 412.012987 | 0.8494  |
| 2-oxoglutarate oxidoreductase, alpha subunit (EC 1.2.7.3)                      | 1813 | 552627 | 553721 | 516.4533821 | 526.508227 | 1.01947 |
| 2-oxoglutarate oxidoreductase, delta subunit, putative (EC 1.2.7.3)            | 1812 | 553718 | 553948 | 210.8695652 | 244.565217 | 1.15979 |
| 4-alpha-glucanotransferase (amylomaltase) (EC 2.4.1.25)                        | 1811 | 554033 | 555505 | 131.7934783 | 148.267663 | 1.125   |
| Isochorismatase (EC 3.3.2.1)                                                   | 1810 | 555517 | 556020 | 23.85685885 | 13.4194831 | 0.5625  |
| RNA polymerase sigma factor RpoD                                               | 1809 | 556337 | 557227 | 66.85393258 | 106.179775 | 1.58824 |
| ankyrin repeat protein, putative                                               | 1808 | 557218 | 557757 | 776.4378479 | 818.181818 | 1.05376 |
| Phosphate butyryltransferase (EC 2.3.1.19)                                     | 1807 | 557775 | 558704 | 177.0721206 | 155.005382 | 0.87538 |
| Probable oxidoreductase protein                                                | 1806 | 558764 | 559936 | 220.9897611 | 190.059727 | 0.86004 |
| Sugar phosphate isomerases/epimerases                                          | 1805 | 559945 | 560937 | 236.8951613 | 235.887097 | 0.99574 |
| Ribose ABC transporter, periplasmic ribose-binding protein rbsB (TC 3.A.1.2.1) | 1804 | 560984 | 561997 | 55.77492596 | 48.8647581 | 0.87611 |
| Transcriptional regulator, TetR family                                         | 1803 | 562090 | 563331 | 246.9782434 | 458.702659 | 1.85726 |
| Acriflavin resistance protein                                                  | 1802 | 563480 | 564862 | 551.3748191 | 905.209841 | 1.64173 |
| Probable Co/Zn/Cd efflux system membrane fusion protein                        | 1801 | 564876 | 565844 | 535.6404959 | 869.318182 | 1.62295 |
| RND multidrug efflux transporter; Acriflavin resistance protein                | 1800 | 565854 | 569108 | 441.1493546 | 761.985249 | 1.72727 |
| ortholog to Borrelia burgdorferi BB0139                                        | 1799 | 569108 | 569401 | 373.7201365 | 575.938567 | 1.5411  |
| hypothetical protein                                                           | 1798 | 569445 | 569651 | 262.1359223 | 349.514563 | 1.33333 |
| hypothetical protein                                                           | 1797 | 569723 | 570496 | 258.0853816 | 419.146184 | 1.62406 |
| Probable peptidyl-prolyl cis-trans isomerase                                   | 1796 | 570551 | 571540 | 530.8392315 | 625.631951 | 1.17857 |
| NADH-dependent butanol dehydrogenase A (EC 1.1.1.-)                            | 1795 | 571703 | 572872 | 311.3772455 | 329.127459 | 1.05701 |
| Recombination protein RecR                                                     | 1794 | 572898 | 573506 | 95.39473684 | 92.5164474 | 0.96983 |
| conserved protein of unknown function likely to be involved in DNA repair      | 1793 | 573503 | 573841 | 217.4556213 | 166.420118 | 0.76531 |
| DNA polymerase III subunits gamma and tau (EC 2.7.7.7)                         | 1792 | 573843 | 575255 | 232.1299639 | 181.949458 | 0.78383 |
| hypothetical protein                                                           | 1791 | 575558 | 576067 | 28.48722986 | 13.2612967 | 0.46552 |
| Uncharacterized protein aq_aa25                                                | 1790 | 576153 | 576761 | 16.44736842 | 11.1019737 | 0.675   |
| hypothetical protein                                                           | 1789 | 576764 | 577045 | 39.14590747 | 16.0142349 | 0.40909 |
| Transcriptional regulator, MerR family                                         | 1788 | 577114 | 577491 | 13.26259947 | 5.96816976 | 0.45    |
| Small multidrug export protein                                                 | 1787 | 577513 | 578004 | 92.66802444 | 77.9022403 | 0.84066 |
| 5-nitroimidazole antibiotic resistance protein                                 | 1786 | 578102 | 578572 | 222.3404255 | 277.659574 | 1.2488  |



|                                                                                                                  |      |        |        |             |            |         |
|------------------------------------------------------------------------------------------------------------------|------|--------|--------|-------------|------------|---------|
| L-ribulose-5-phosphate 4-epimerase (EC 5.1.3.4)                                                                  | 1785 | 578613 | 579347 | 279.2915531 | 337.19346  | 1.20732 |
| Ribulokinase (EC 2.7.1.16)                                                                                       | 1784 | 579347 | 581026 | 349.6128648 | 361.822513 | 1.03492 |
| hypothetical protein                                                                                             | 1783 | 581051 | 581962 | 307.9034029 | 303.787047 | 0.98663 |
| Thymidylate synthase thyX (EC 2.1.1.-)                                                                           | 1782 | 582034 | 582870 | 93.89952153 | 67.284689  | 0.71656 |
| hypothetical protein                                                                                             | 1781 | 582887 | 583231 | 56.68604651 | 71.9476744 | 1.26923 |
| Chitinase (EC 3.2.1.14)                                                                                          | 1780 | 583232 | 584944 | 94.04205607 | 143.253505 | 1.52329 |
| unknown                                                                                                          | 1779 | 584957 | 585904 | 159.9788807 | 142.555438 | 0.89109 |
| hypothetical protein                                                                                             | 1775 | 586382 | 586570 | 138.2978723 | 71.8085106 | 0.51923 |
| 4-Hydroxy-2-oxoglutarate aldolase (EC 4.1.3.16) /<br>2-dehydro-3-deoxyphosphogluconate aldolase<br>(EC 4.1.2.14) | 1774 | 586594 | 587253 | 69.04400607 | 47.7996965 | 0.69231 |
| Glucose-6-phosphate isomerase (EC 5.3.1.9)                                                                       | 1773 | 587241 | 587378 | 40.1459854  | 0          | 0       |
| hypothetical protein                                                                                             |      | 587623 | 587754 | 86.95652174 | 122.282609 | 1.40625 |
| Myo-inositol 2-dehydrogenase (EC 1.1.1.18)                                                                       | 1769 | 587867 | 588853 | 201.8255578 | 219.066937 | 1.08543 |
| Transketolase (EC 2.2.1.1)                                                                                       | 1768 | 588885 | 590855 | 466.751269  | 529.949239 | 1.1354  |
| DNA binding protein/PTS system, IIA component<br>ORF encoded in ISPre3                                           | 1767 | 590906 | 591391 | 123.7113402 | 129.896907 | 1.05    |
| Collagen binding protein Cna                                                                                     | 1766 | 591405 | 593381 | 166.7510121 | 169.660931 | 1.01745 |
| hypothetical protein                                                                                             | 1765 | 593572 | 595089 | 152.9334212 | 468.6882   | 3.06466 |
| TRAP-type C4-dicarboxylate transport system,<br>periplasmic component                                            | 1764 | 595452 | 595664 | 28.30188679 | 10.6132075 | 0.375   |
| TRAP-type C4-dicarboxylate transport system,<br>large permease component                                         | 1763 | 595910 | 596923 | 308.6053412 | 364.985163 | 1.18269 |
| hypothetical protein                                                                                             | 1762 | 596923 | 598788 | 100.4849138 | 110.317888 | 1.09786 |
| hypothetical protein                                                                                             | 1761 | 598801 | 599625 | 128.1895504 | 155.832321 | 1.21564 |
| hypothetical protein                                                                                             | 1760 | 599654 | 601600 | 90.44193217 | 105.215827 | 1.16335 |
| hypothetical protein                                                                                             | 1759 | 601629 | 603746 | 27.86962683 | 19.1308455 | 0.68644 |
| hypothetical protein                                                                                             | 1758 | 603743 | 607720 | 49.40910234 | 25.4588886 | 0.51527 |
| hypothetical protein                                                                                             | 1757 | 608169 | 608333 | 18.29268293 | 13.7195122 | 0.75    |
| Kinesin light chain                                                                                              | 1756 | 608437 | 613572 | 31.1587147  | 27.1665044 | 0.87188 |
| 2-haloalkanoic acid dehalogenase (EC 3.8.1.2)                                                                    | 1755 | 613643 | 614206 | 87.92184725 | 83.9253996 | 0.95455 |
| Homolog of plant auxin-responsive GH3-like<br>protein                                                            | 1754 | 614290 | 615990 | 470.3748489 | 472.037485 | 1.00353 |
| Homolog of plant auxin-responsive GH3-like<br>protein                                                            | 1753 | 616029 | 617729 | 294.8870392 | 346.462545 | 1.1749  |
| Hsp20/alpha crystallin family protein                                                                            | 1752 | 618218 | 618667 | 6596.88196  | 5131.40312 | 0.77785 |
| FOG: WD40 repeat                                                                                                 | 1751 | 618744 | 621686 | 56.25424881 | 24.4731475 | 0.43505 |
| UDP-N-acetylglucosamine 1-<br>carboxyvinyltransferase (EC 2.5.1.7)                                               | 1750 | 621723 | 622997 | 107.9277865 | 98.9010989 | 0.91636 |
| hypothetical protein                                                                                             | 1749 | 623053 | 623253 | 20          | 0          | 0       |
| hypothetical protein                                                                                             | 1748 | 623360 | 623500 | 0           | 0          | #DIV/0! |
| Plasmid stabilization system                                                                                     | 1747 | 623504 | 623839 | 2.985074627 | 0          | 0       |
| RNP-1 like RNA-binding protein                                                                                   | 1746 | 624362 | 624664 | 2554.421769 | 3053.57143 | 1.19541 |
| hypothetical protein                                                                                             | 1745 | 624709 | 624900 | 531.4136126 | 659.685864 | 1.24138 |
| DNA repair protein RadA                                                                                          | 1744 | 624978 | 626354 | 130.7356154 | 73.7436271 | 0.56407 |
| Adenine deaminase (EC 3.5.4.2)                                                                                   | 1742 | 626411 | 628156 | 58.16618911 | 47.7077364 | 0.8202  |
| Uroporphyrinogen-III methyltransferase (EC<br>2.1.1.107) / Uroporphyrinogen-III synthase (EC<br>4.2.1.75)        | 1743 | 628134 | 629669 | 81.43322476 | 41.0423453 | 0.504   |
| Porphobilinogen deaminase (EC 2.5.1.61)                                                                          | 1741 | 629666 | 630616 | 91.57894737 | 66.3157895 | 0.72414 |

|                                                                                                                       |      |        |        |             |            |         |
|-----------------------------------------------------------------------------------------------------------------------|------|--------|--------|-------------|------------|---------|
| Siroheme synthase / Precorrin-2 oxidase (EC 1.3.1.76)                                                                 | 1740 | 630613 | 631194 | 139.4148021 | 89.070568  | 0.63889 |
| Mov34/MPN/PAD-1                                                                                                       | 1739 | 631201 | 631605 | 201.7326733 | 100.247525 | 0.49693 |
| ThiS, thiamine-biosynthesis                                                                                           | 1738 | 631599 | 631808 | 124.4019139 | 64.5933014 | 0.51923 |
| Sulfate-binding protein sbp                                                                                           | 1737 | 631985 | 633055 | 228.0373832 | 10.5140187 | 0.04611 |
| Sulfate transport system permease protein cysT                                                                        | 1736 | 633067 | 633927 | 38.91509434 | 0          | 0       |
| Sulfate transport system permease protein cysW                                                                        | 1735 | 633924 | 634754 | 36.74698795 | 0          | 0       |
| Sulfate and thiosulfate import ATP-binding protein cysA (EC 3.6.3.25)                                                 | 1734 | 634751 | 635824 | 103.4482759 | 18.8723206 | 0.18243 |
| Phosphoadenylyl-sulfate reductase [thioredoxin] (EC 1.8.4.8) / Adenylyl-sulfate reductase [thioredoxin] (EC 1.8.4.10) | 1733 | 635814 | 636512 | 138.9684814 | 64.469914  | 0.46392 |
| Sulfate adenylyltransferase subunit 2 (EC 2.7.7.4)                                                                    | 1732 | 636520 | 637422 | 100         | 32.5       | 0.325   |
| Sulfate adenylyltransferase subunit 1 (EC 2.7.7.4) / Adenylylsulfate kinase (EC 2.7.1.25)                             | 1731 | 637422 | 638783 | 101.7634093 | 47.9426892 | 0.47112 |
| Dinucleotide-utilizing enzymes involved in molybdopterin and thiamine biosynthesis family 2 hypothetical protein      | 1730 | 638836 | 639660 | 291.2621359 | 229.368932 | 0.7875  |
|                                                                                                                       | 1729 | 639660 | 639929 | 433.0855019 | 443.30855  | 1.02361 |
| Dissimilatory sulfite reductase (desulfoviridin), alpha and beta subunits                                             | 1728 | 639926 | 640792 | 271.9399538 | 280.600462 | 1.03185 |
| Multi antimicrobial extrusion protein (Na <sup>+</sup> )/drug antiporter), MATE family of MDR efflux pumps            | 1727 | 640851 | 642227 | 33.52769679 | 9.83965015 | 0.29348 |
| S-adenosylmethionine synthetase (EC 2.5.1.6)                                                                          | 1726 | 642364 | 643539 | 22.55319149 | 1.91489362 | 0.08491 |
| Radical SAM domain protein                                                                                            | 1725 | 643536 | 644756 | 29.50819672 | 7.37704918 | 0.25    |
| hypothetical protein                                                                                                  | 1724 | 644784 | 645806 | 21.037182   | 8.80626223 | 0.4186  |
| Taurine transport ATP-binding protein tauB                                                                            | 1723 | 645816 | 646664 | 34.19811321 | 10.6132075 | 0.31034 |
| Taurine transport system permease protein tauC                                                                        | 1722 | 646676 | 647473 | 29.48557089 | 2.82308657 | 0.09574 |
| Nitrogenase iron protein (EC 1.18.6.1)                                                                                | 1721 | 647477 | 648352 | 34.28571429 | 5.14285714 | 0.15    |
| Nitrogenase vanadium-cofactor synthesis protein VnfE                                                                  | 1720 | 648353 | 649774 | 16.18578466 | 1.58339198 | 0.09783 |
| Nitrogenase vanadium-cofactor synthesis protein VnfN                                                                  | 1719 | 649774 | 651114 | 27.98507463 | 25.1865672 | 0.9     |
| Chaperone protein HtpG                                                                                                | 1718 | 651138 | 653051 | 534.7621537 | 728.044956 | 1.36144 |
| hypothetical protein                                                                                                  | 1717 | 653077 | 653193 | 17.24137931 | 19.3965517 | 1.125   |
| transcriptional regulator, Cro/Ci family                                                                              | 1716 | 653636 | 653932 | 60.81081081 | 22.8040541 | 0.375   |
| hypothetical protein                                                                                                  | 1715 | 654108 | 654332 | 17.85714286 | 10.0446429 | 0.5625  |
| VapC toxin protein                                                                                                    | 1714 | 654329 | 654724 | 17.72151899 | 0          | 0       |
| transcriptional regulator, Cro/Ci family                                                                              | 1713 | 654931 | 655227 | 45.60810811 | 38.0067568 | 0.83333 |
| Beta-lactamase (EC 3.5.2.6)                                                                                           | 1712 | 655224 | 655604 | 10.52631579 | 0          | 0       |
| hypothetical protein                                                                                                  | 1711 | 655631 | 656251 | 21.77419355 | 0          | 0       |
| hypothetical protein                                                                                                  | 1710 | 656414 | 656623 | 19.13875598 | 0          | 0       |
| hypothetical protein                                                                                                  | 1709 | 656727 | 657281 | 5.165289256 | 0          | 0       |
| hypothetical protein                                                                                                  | 1708 | 657284 | 657550 | 22.72727273 | 12.7840909 | 0.5625  |
| transposase, mutator family                                                                                           | 1707 | 657616 | 658857 | 48.34810637 | 38.0741338 | 0.7875  |
| Large extracellular alpha-helical protein                                                                             | 1706 | 659203 | 665115 | 87.87212449 | 70.4076455 | 0.80125 |
| Small-conductance mechanosensitive channel                                                                            | 1705 | 665133 | 665954 | 53.59317905 | 46.589525  | 0.86932 |

|                                                                                                                                       |      |        |        |             |            |         |
|---------------------------------------------------------------------------------------------------------------------------------------|------|--------|--------|-------------|------------|---------|
| Multimodular transpeptidase-transglycosylase<br>(EC 2.4.1.129) (EC 3.4.-.-)                                                           | 1704 | 665941 | 668322 | 48.50902982 | 43.4691306 | 0.8961  |
| hypothetical protein                                                                                                                  | 1703 | 668347 | 670581 | 49.01521934 | 19.1360788 | 0.39041 |
| Uracil-DNA glycosylase (EC 3.2.2.-)                                                                                                   | 1702 | 670578 | 670787 | 162.6794258 | 75.3588517 | 0.46324 |
| Phosphoenolpyruvate-protein phosphotransferase<br>of PTS system (EC 2.7.3.9)                                                          | 1701 | 670836 | 672581 | 172.7793696 | 242.406877 | 1.40299 |
| GTP-binding protein EngA                                                                                                              | 1700 | 672578 | 673945 | 107.1689832 | 125.091441 | 1.16724 |
| Transcriptional regulator, MerR family                                                                                                | 1699 | 673947 | 674300 | 63.73937677 | 76.4872521 | 1.2     |
| Conserved domain protein                                                                                                              | 1698 | 674287 | 675510 | 49.05968929 | 33.1152903 | 0.675   |
| D-alanyl-D-alanine carboxypeptidase (EC<br>3.4.16.4)                                                                                  | 1697 | 675565 | 676452 | 69.33483653 | 48.1961669 | 0.69512 |
| Multi antimicrobial extrusion protein (Na <sup>+</sup> )/drug<br>antiporter), MATE family of MDR efflux pumps                         | 1696 | 676453 | 677889 | 84.26183844 | 84.6100279 | 1.00413 |
| hypothetical protein                                                                                                                  | 1695 | 677905 | 678018 | 0           | 0          | #DIV/0! |
| Transcriptional regulator, ArsR family                                                                                                | 1694 | 678069 | 678419 | 34.28571429 | 45         | 1.3125  |
| Lead, cadmium, zinc and mercury transporting<br>ATPase (EC 3.6.3.3) (EC 3.6.3.5); Copper-<br>translocating P-type ATPase (EC 3.6.3.4) | 1692 | 678420 | 680405 | 49.37027708 | 43.0730479 | 0.87245 |
| hypothetical protein                                                                                                                  | 1693 | 680380 | 680502 | 0           | 0          | #DIV/0! |
| hypothetical protein                                                                                                                  | 1691 | 680503 | 681153 | 774.6153846 | 1810.38462 | 2.33714 |
| hypothetical protein                                                                                                                  | 1690 | 681256 | 682269 | 131.2931885 | 333.168806 | 2.53759 |
| hypothetical protein                                                                                                                  | 1689 | 682501 | 682620 | 4.201680672 | 0          | 0       |
| hypothetical protein                                                                                                                  |      | 682623 | 684758 | 17.56440281 | 12.64637   | 0.72    |
| Protein export cytoplasm protein SecA ATPase                                                                                          |      |        |        |             |            |         |
| RNA helicase (TC 3.A.5.1.1)                                                                                                           | 1687 | 684801 | 691094 | 27.09359606 | 16.0893056 | 0.59384 |
| Kinesin light chain                                                                                                                   | 1686 | 691106 | 695242 | 22.12282398 | 9.24806576 | 0.41803 |
| hypothetical protein                                                                                                                  | 1684 | 695520 | 696794 | 71.03610675 | 75.9419152 | 1.06906 |
| RNA polymerase sigma-54 factor rpoN                                                                                                   | 1683 | 696697 | 698238 | 56.78131084 | 36.5022713 | 0.64286 |
| Ribosome hibernation protein YhbH                                                                                                     | 1682 | 698266 | 698556 | 87.93103448 | 46.5517241 | 0.52941 |
| Glutathione peroxidase (EC 1.11.1.9)                                                                                                  | 1681 | 698574 | 699104 | 73.58490566 | 84.9056604 | 1.15385 |
| transcriptional regulator, MarR family                                                                                                | 1680 | 699172 | 699675 | 25.84493042 | 13.4194831 | 0.51923 |
| Nitroreductase                                                                                                                        | 1679 | 699743 | 700279 | 56.90298507 | 50.3731343 | 0.88525 |
| Excinuclease ABC subunit C                                                                                                            | 1978 | 700313 | 702328 | 86.35235732 | 45.7816377 | 0.53017 |
| Conserved protein                                                                                                                     | 1677 | 702358 | 702885 | 56.9259962  | 42.6944972 | 0.75    |
| Corrinoid methyltransferase protein                                                                                                   | 1676 | 703029 | 703664 | 672.4409449 | 818.503937 | 1.21721 |
| probable electron transfer protein                                                                                                    | 1675 | 703725 | 705215 | 60.40268456 | 45.3020134 | 0.75    |
| CO dehydrogenase accessory protein CooC<br>(nickel insertion)                                                                         | 1674 | 705230 | 706000 | 44.80519481 | 26.2987013 | 0.58696 |
| probable electron transfer protein                                                                                                    | 1673 | 706000 | 707988 | 37.9778672  | 16.9768612 | 0.44702 |
| hypothetical protein                                                                                                                  | 1672 | 707985 | 708626 | 24.96099844 | 7.02028081 | 0.28125 |
| hypothetical protein                                                                                                                  | 1671 | 708742 | 708867 | 0           | 0          | #DIV/0! |
| hypothetical protein                                                                                                                  | 1670 | 708870 | 709061 | 0           | 0          | #DIV/0! |
| PIN domain protein                                                                                                                    | 1669 | 709058 | 709441 | 9.868421053 | 0          | 0       |
| Ig domain protein, group 2 domain protein                                                                                             | 1668 | 709691 | 711643 | 34.32377049 | 2.30532787 | 0.06716 |
| hypothetical protein                                                                                                                  | 1667 | 711909 | 712055 | 10.2739726  | 0          | 0       |
| hypothetical protein                                                                                                                  | 1666 | 712097 | 712462 | 10.95890411 | 0          | 0       |
| hypothetical protein                                                                                                                  | 1664 | 712461 | 712595 | 0           | 0          | #DIV/0! |
| BarA-associated response regulator UvrY (=                                                                                            |      |        |        |             |            |         |
| GacA = SirA)                                                                                                                          | 1665 | 712590 | 713216 | 23.1629393  | 10.7827476 | 0.46552 |
| hypothetical protein                                                                                                                  | 1663 | 713209 | 713838 | 38.95071542 | 7.15421304 | 0.18367 |

|                                                                                  |      |        |        |             |            |         |
|----------------------------------------------------------------------------------|------|--------|--------|-------------|------------|---------|
| Sensor histidine kinase                                                          | 1661 | 713925 | 715127 | 54.0765391  | 20.5906822 | 0.38077 |
| Oxidoreductase (EC 1.1.1.-)                                                      | 1662 | 715117 | 716265 | 85.80139373 | 54.8780488 | 0.63959 |
| Inosose dehydratase (EC 4.2.1.44)                                                | 1660 | 716262 | 717086 | 87.37864078 | 43.6893204 | 0.5     |
| hypothetical protein                                                             | 1659 | 717103 | 718317 | 46.54036244 | 11.1202636 | 0.23894 |
| Catabolite control protein A                                                     | 1658 | 718319 | 719380 | 30.1602262  | 12.7238454 | 0.42188 |
| Maltose/maltodextrin ABC transporter, permease protein MalF                      | 1657 | 719689 | 720609 | 23.91304348 | 12.2282609 | 0.51136 |
| Maltose/maltodextrin ABC transporter, permease protein MalG                      | 1656 | 720625 | 721485 | 34.30232558 | 15.6976744 | 0.45763 |
| N-Acetyl-D-glucosamine ABC transport system, sugar-binding protein               | 1655 | 721550 | 722845 | 83.3976834  | 93.8223938 | 1.125   |
| Sugar phosphate isomerase/epimerase                                              | 1654 | 722863 | 723699 | 32.29665072 | 40.3708134 | 1.25    |
| hypothetical protein                                                             | 1653 | 723724 | 724788 | 49.81203008 | 42.2932331 | 0.84906 |
| hypothetical protein                                                             | 1651 | 724820 | 725662 | 736.935867  | 908.551069 | 1.23288 |
| 5-methyltetrahydrofolate--homocysteine methyltransferase (EC 2.1.1.13)           | 1652 | 725659 | 726465 | 189.2059553 | 212.158809 | 1.12131 |
| Carbon monoxide dehydrogenase CooS subunit (EC 1.2.99.2)                         | 1650 | 726682 | 728577 | 83.11345646 | 49.8680739 | 0.6     |
| CO dehydrogenase accessory protein CooC (nickel insertion)                       | 1649 | 728574 | 729356 | 39.64194373 | 11.5089514 | 0.29032 |
| CO dehydrogenase/acetyl-CoA synthase, acetyl-CoA synthase subunit (EC 2.3.1.169) | 1648 | 729392 | 731521 | 54.25082198 | 44.3870362 | 0.81818 |
| Acetyl-CoA synthase corrinoid iron-sulfur protein, small subunit                 | 1647 | 731567 | 732508 | 137.6195537 | 126.726886 | 0.92085 |
| Acetyl-CoA synthase corrinoid iron-sulfur protein, large subunit                 | 1645 | 732530 | 733861 | 228.7753569 | 218.069121 | 0.9532  |
| hypothetical protein                                                             | 1646 | 733842 | 733964 | 0           | 0          | #DIV/0! |
| 5-methyltetrahydrofolate:corrinoid iron-sulfur protein methyltransferase         | 1644 | 733929 | 734714 | 168.1528662 | 183.43949  | 1.09091 |
| hypothetical protein                                                             | 1643 | 734726 | 734995 | 100.3717472 | 58.5501859 | 0.58333 |
| hypothetical protein                                                             | 1642 | 734995 | 735198 | 44.33497537 | 33.2512315 | 0.75    |
| hypothetical protein                                                             | 1641 | 735251 | 735373 | 20.49180328 | 0          | 0       |
| hypothetical protein                                                             | 1640 | 735342 | 735455 | 26.54867257 | 0          | 0       |
| hypothetical protein                                                             |      | 735724 | 736380 | 108.2317073 | 89.1768293 | 0.82394 |
| Fibronectin type III domain protein                                              |      | 736340 | 737284 | 107.5211864 | 100.105932 | 0.93103 |
| TPR Domain containing protein                                                    | 1637 | 737299 | 739896 | 170.3889103 | 129.091259 | 0.75763 |
| Metal-dependent phosphohydrolase, HD subdomain                                   | 1636 | 739886 | 740746 | 97.09302326 | 75.872093  | 0.78144 |
| Metal-dependent hydrolases of the beta-lactamase superfamily I                   | 1635 | 740757 | 741668 | 83.4248079  | 79.0340285 | 0.94737 |
| Sensory box histidine kinase/response regulator                                  | 1634 | 741677 | 743947 | 64.0969163  | 35.6828194 | 0.5567  |
| Transcriptional regulator, LuxR family                                           | 1633 | 743966 | 744580 | 51.3029316  | 14.6579805 | 0.28571 |
| hypothetical protein                                                             | 1632 | 744610 | 745635 | 108.7804878 | 100.97561  | 0.92825 |
| Putative malate dehydrogenase (EC 1.1.1.37), similar to archaeal MJ1425          | 1631 | 745651 | 746769 | 504.4722719 | 428.667263 | 0.84973 |
| Aminopeptidase YpdF (MP-, MA-, MS-, AP-, NP-specific)                            | 1630 | 746813 | 747931 | 76.47584973 | 40.2504472 | 0.52632 |
| Low-specificity L-threonine aldolase (EC 4.1.2.5)                                | 1629 | 747928 | 748977 | 215.4432793 | 242.373689 | 1.125   |
| Glucosamine--fructose-6-phosphate aminotransferase [isomerizing] (EC 2.6.1.16)   | 1628 | 748997 | 750838 | 169.6672122 | 139.934534 | 0.82476 |

|                                                                                               |      |        |        |             |            |         |
|-----------------------------------------------------------------------------------------------|------|--------|--------|-------------|------------|---------|
| Mannose-6-phosphate isomerase                                                                 | 1627 | 750848 | 751147 | 272.5752508 | 255.852843 | 0.93865 |
| hypothetical protein                                                                          | 1626 | 751121 | 751270 | 483.2214765 | 302.013423 | 0.625   |
| Flagellar biosynthesis protein fliL                                                           | 1625 | 751296 | 751748 | 51.99115044 | 29.8672566 | 0.57447 |
| hypothetical protein                                                                          | 1624 | 751827 | 752162 | 88.05970149 | 53.7313433 | 0.61017 |
| RNA polymerase sigma factor RpoE                                                              | 1623 | 752159 | 752761 | 73.92026578 | 29.9003322 | 0.40449 |
| hypothetical protein                                                                          | 1622 | 752740 | 753228 | 45.08196721 | 13.8319672 | 0.30682 |
| Glycogen phosphorylase (EC 2.4.1.1)                                                           | 1620 | 753320 | 755860 | 506.1143984 | 568.934911 | 1.12412 |
| Proteophosphoglycan                                                                           | 1621 | 755847 | 756236 | 1359.897172 | 1636.88946 | 1.20369 |
| Putative preQ0 transporter                                                                    | 1618 | 756399 | 757124 | 109.6551724 | 71.3793103 | 0.65094 |
| Sugar (Glycoside-Pentoside-Hexuronide) transporter                                            |      | 757105 | 757476 | 115.902965  | 97.0350404 | 0.83721 |
| Predicted b-glucoside transporter, GPH family                                                 |      | 757476 | 758459 | 87.99593082 | 57.2227874 | 0.65029 |
| Antiholin-like protein LrgA                                                                   | 1616 | 758526 | 758882 | 21.06741573 | 44.241573  | 2.1     |
| lrgA-associated membrane protein LrgB                                                         | 1615 | 758885 | 759565 | 46.32352941 | 9.92647059 | 0.21429 |
| Cysteine synthase (EC 2.5.1.47)                                                               | 1614 | 759639 | 760532 | 167.9731243 | 100.783875 | 0.6     |
| Mov34/MPN/PAD-1                                                                               | 1613 | 760529 | 760954 | 161.1764706 | 111.176471 | 0.68978 |
| 9.5 kDa culture filtrate antigen cfp10A                                                       | 1612 | 760945 | 761223 | 196.0431655 | 226.618705 | 1.15596 |
| Sulfur carrier protein adenylyltransferase ThiF                                               | 1610 | 761230 | 762402 | 352.8156997 | 203.498294 | 0.57678 |
| Conserved domain protein                                                                      | 1611 | 762399 | 763658 | 71.88244639 | 51.8268467 | 0.72099 |
| Alkaline phosphodiesterase I (EC 3.1.4.1) / Nucleotide pyrophosphatase (EC 3.6.1.9)           | 1609 | 763715 | 764638 | 119.7183099 | 92.6327194 | 0.77376 |
| Major membrane protein I                                                                      | 1608 | 764817 | 765758 | 573.8575983 | 346.705632 | 0.60417 |
| Cysteine desulfurase (EC 2.8.1.7)                                                             | 1607 | 765745 | 767220 | 334.9152542 | 213.559322 | 0.63765 |
| hypothetical protein                                                                          | 1606 | 767235 | 767453 | 105.5045872 | 30.9633028 | 0.29348 |
| hypothetical protein                                                                          | 1605 | 767533 | 767754 | 11.31221719 | 20.361991  | 1.8     |
| Serine acetyltransferase (EC 2.3.1.30)                                                        | 1604 | 767738 | 768691 | 80.27282267 | 68.4679958 | 0.85294 |
| Methionine gamma-lyase (EC 4.4.1.11)                                                          | 1603 | 768679 | 769908 | 75.26444264 | 51.261188  | 0.68108 |
| hypothetical protein                                                                          | 1602 | 769917 | 770507 | 30.50847458 | 7.62711864 | 0.25    |
| Cysteine synthase (EC 2.5.1.47)                                                               | 1601 | 770504 | 771481 | 43.50051177 | 2.30296827 | 0.05294 |
| ABC-type nitrate/sulfonate/bicarbonate transport system, ATPase component                     | 1600 | 771493 | 772371 | 24.48747153 | 5.12528474 | 0.2093  |
| ABC transporter permease protein with unknown substrate                                       | 1599 | 772448 | 773284 | 4.784688995 | 0          | 0       |
| putative nitrate transport system substrate-binding protein                                   | 1598 | 773388 | 774440 | 44.20152091 | 19.2490494 | 0.43548 |
| hypothetical protein                                                                          | 1597 | 774604 | 774723 | 50.42016807 | 18.907563  | 0.375   |
| hypothetical protein                                                                          | 1596 | 774759 | 774917 | 132.9113924 | 142.405063 | 1.07143 |
| hypothetical protein                                                                          | 1595 | 775182 | 775433 | 29.88047809 | 53.7848606 | 1.8     |
| Chromosome (plasmid) partitioning protein ParB / Stage 0 sporulation protein J                | 1594 | 775458 | 776333 | 171.4285714 | 228.857143 | 1.335   |
| Chromosome (plasmid) partitioning protein ParA / Sporulation initiation inhibitor protein soj | 1593 | 776323 | 777087 | 167.539267  | 220.876963 | 1.31836 |
| hydrolase, haloacid dehalogenase-like family                                                  | 1592 | 777156 | 777974 | 180.3178484 | 145.782396 | 0.80847 |
| anti-sigma B factor RsbT                                                                      | 1591 | 777978 | 778958 | 125.5102041 | 149.234694 | 1.18902 |
| hypothetical protein                                                                          | 1590 | 778955 | 779299 | 140.9883721 | 98.1104651 | 0.69588 |
| hypothetical protein                                                                          | 1589 | 779283 | 780071 | 83.12182741 | 51.3959391 | 0.61832 |
| Probable lipoprotein nlpC precursor                                                           | 1588 | 780084 | 781226 | 51.66374781 | 21.6725044 | 0.41949 |
| Glutamate synthase [NADPH] large chain (EC 1.4.1.13)                                          | 1587 | 781436 | 786145 | 221.0840802 | 381.241997 | 1.72442 |
| Glutamate synthase [NADPH] small chain (EC 1.4.1.13)                                          | 1585 | 786155 | 787609 | 266.5061898 | 490.543329 | 1.84065 |



|                                                                                                                            |      |        |        |             |            |         |
|----------------------------------------------------------------------------------------------------------------------------|------|--------|--------|-------------|------------|---------|
| Thiol:disulfide oxidoreductase related to ResA                                                                             | 1586 | 787606 | 788154 | 86.67883212 | 61.5875912 | 0.71053 |
| Protein crcB homolog                                                                                                       | 1583 | 788233 | 788610 | 17.24137931 | 17.9045093 | 1.03846 |
| Cytochrome c-type biogenesis protein DsbD, protein-disulfide reductase (EC 1.8.1.8)                                        | 1584 | 788591 | 789286 | 31.65467626 | 16.1870504 | 0.51136 |
| Hydrolase (HAD superfamily)                                                                                                | 1581 | 789315 | 790178 | 76.4774044  | 93.8586327 | 1.22727 |
| Ribokinase (EC 2.7.1.15)                                                                                                   | 1582 | 790175 | 791074 | 55.61735261 | 110.122358 | 1.98    |
| Ribose operon repressor                                                                                                    | 1580 | 791071 | 792093 | 70.45009785 | 158.51272  | 2.25    |
| Multiple sugar ABC transporter, membrane-spanning permease protein MsmF                                                    | 1579 | 792325 | 793317 | 9.576612903 | 47.6310484 | 4.97368 |
| maltose/maltodextrin transport permease                                                                                    | 1578 | 793317 | 794204 | 22.54791432 | 88.7824126 | 3.9375  |
| ABC transporter substrate-binding protein - sugar transport                                                                | 1577 | 794228 | 795781 | 38.31294269 | 547.64971  | 14.2941 |
| hypothetical protein                                                                                                       | 1576 | 795901 | 798039 | 23.85406922 | 203.110384 | 8.51471 |
| putative membrane protein                                                                                                  | 1575 | 798115 | 799464 | 6.671608599 | 75.0555967 | 11.25   |
| Inosine-uridine preferring nucleoside hydrolase (EC 3.2.2.1)                                                               | 1574 | 799701 | 800621 | 23.36956522 | 100.271739 | 4.2907  |
| hypothetical protein                                                                                                       |      | 800794 | 801102 | 12.98701299 | 0          | 0       |
| Putative cytoplasmic protein                                                                                               | 1572 | 801426 | 802460 | 58.0270793  | 65.2804642 | 1.125   |
| putative membrane protein                                                                                                  | 1571 | 802536 | 803888 | 62.13017751 | 99.852071  | 1.60714 |
| Acetyltransferase, GNAT family                                                                                             | 1570 | 803906 | 805063 | 61.36560069 | 89.4554883 | 1.45775 |
| hypothetical protein                                                                                                       | 1569 | 805095 | 806372 | 72.04385278 | 52.8582616 | 0.7337  |
| Adenylosuccinate lyase (EC 4.3.2.2)                                                                                        | 1568 | 806428 | 807894 | 97.67759563 | 169.057377 | 1.73077 |
| Inosine-5'-monophosphate dehydrogenase (EC 1.1.1.205)                                                                      | 1567 | 807887 | 809323 | 235.3760446 | 401.114206 | 1.70414 |
| hypothetical protein                                                                                                       | 1566 | 809396 | 810088 | 98.98843931 | 152.817919 | 1.5438  |
| Adenylosuccinate synthetase (EC 6.3.4.4)                                                                                   | 1565 | 810172 | 811398 | 227.1615008 | 291.80261  | 1.28456 |
| GMP synthase [glutamine-hydrolyzing] (EC 6.3.5.2)                                                                          | 1564 | 811420 | 813009 | 137.1932033 | 143.014475 | 1.04243 |
| Magnesium transporter                                                                                                      | 1563 | 813227 | 814564 | 71.05459985 | 74.0463725 | 1.04211 |
| ATP-dependent DNA helicase pcrA (EC 3.6.1.-)                                                                               | 1562 | 814574 | 817801 | 42.31246125 | 33.4779913 | 0.79121 |
| ATP:Cob(I)alamin adenosyltransferase (EC 2.5.1.17), ethanolamine utilization                                               | 1560 | 817838 | 818359 | 92.13051823 | 47.5047985 | 0.51563 |
| putative membrane protein                                                                                                  | 1561 | 818349 | 818957 | 43.58552632 | 7.40131579 | 0.16981 |
| hypothetical protein                                                                                                       | 1558 | 818937 | 819077 | 7.142857143 | 0          | 0       |
| hypothetical protein                                                                                                       | 1559 | 819074 | 820114 | 1483.653846 | 1821.63462 | 1.2278  |
| Chromosome partition protein smc                                                                                           | 1557 | 820322 | 823339 | 190.0894929 | 346.784886 | 1.82432 |
| Maltose/maltodextrin transport ATP-binding protein MalK (EC 3.6.3.19); Multiple sugar ABC transporter, ATP-binding protein | 1556 | 823568 | 824686 | 850.1788909 | 1376.5653  | 1.61915 |
| Cold-shock DEAD-box protein A                                                                                              | 1554 | 824789 | 826690 | 270.9100473 | 207.127827 | 0.76456 |
| 5-methyltetrahydrofolate--homocysteine methyltransferase (EC 2.1.1.13)                                                     | 1555 | 826662 | 827327 | 26.31578947 | 20.3007519 | 0.77143 |
| Transcriptional regulator, AraC family                                                                                     | 1553 | 827358 | 828737 | 15.59100798 | 3.26323423 | 0.2093  |
| Transcriptional regulator, AraC family                                                                                     | 1552 | 828734 | 829843 | 18.48512173 | 0          | 0       |
| Transcriptional activator of maltose regulon, MalT                                                                         | 1551 | 829927 | 832437 | 51.19521912 | 34.9601594 | 0.68288 |
| Flagellar motor switch protein fliG                                                                                        | 1550 | 832504 | 833712 | 101.8211921 | 121.067881 | 1.18902 |
| Metalloprotease, insulinase family                                                                                         | 1549 | 833709 | 836738 | 66.02839221 | 58.6827336 | 0.88875 |
| hypothetical protein                                                                                                       | 1548 | 836763 | 837005 | 115.7024793 | 55.785124  | 0.48214 |
| MG(2+) CHELATASE FAMILY PROTEIN / ComM-related protein                                                                     | 1547 | 837125 | 838732 | 32.66957063 | 7.00062228 | 0.21429 |

|                                                                                                                          |      |        |        |             |            |         |
|--------------------------------------------------------------------------------------------------------------------------|------|--------|--------|-------------|------------|---------|
| hypothetical protein                                                                                                     | 1546 | 838813 | 839121 | 95.77922078 | 102.272727 | 1.0678  |
| hypothetical protein                                                                                                     | 1544 | 839081 | 839386 | 75.40983607 | 88.5245902 | 1.17391 |
| COG0613, Predicted metal-dependent phosphoesterases (PHP family)                                                         | 1545 | 839370 | 840221 | 128.6721504 | 100.470035 | 0.78082 |
| hypothetical protein                                                                                                     | 1543 | 840328 | 840699 | 54.49591281 | 12.2615804 | 0.225   |
| Peroxide stress regulator PerR, FUR family                                                                               | 1542 | 841069 | 841590 | 34.54894434 | 34.5489443 | 1       |
| Chlorohydrolase family protein                                                                                           |      | 841656 | 842882 | 403.3442088 | 475.326264 | 1.17846 |
| transcriptional regulator, Crp/Fnr family                                                                                | 1540 | 842895 | 843887 | 339.2137097 | 369.707661 | 1.0899  |
| transcriptional regulator, Crp/Fnr family                                                                                | 1539 | 843888 | 844532 | 340.0621118 | 310.947205 | 0.91438 |
| LPXTG anchored putative adhesin                                                                                          | 1538 | 844954 | 846927 | 1412.569691 | 2074.37912 | 1.46851 |
| Iron-sulfur flavoprotein                                                                                                 | 1537 | 847136 | 847831 | 142.4460432 | 168.345324 | 1.18182 |
| Rrf2 family transcriptional regulator                                                                                    | 1536 | 847831 | 848229 | 18.84422111 | 11.3065327 | 0.6     |
| Carbon monoxide dehydrogenase CooS subunit (EC 1.2.99.2)                                                                 | 1535 | 848295 | 850181 | 117.709438  | 84.7030753 | 0.71959 |
| Nitrite reductase probable electron transfer 4Fe-S subunit (EC 1.7.1.4)                                                  | 1534 | 850192 | 850659 | 61.02783726 | 48.1798715 | 0.78947 |
| Nitrite reductase probable [NAD(P)H] subunit (EC 1.7.1.4)                                                                | 1533 | 850661 | 851884 | 107.9313164 | 69.9100572 | 0.64773 |
| hypothetical protein                                                                                                     | 1531 | 852183 | 852704 | 63.33973129 | 51.8234165 | 0.81818 |
| INTEGRAL MEMBRANE PROTEIN (Rhomboid family)                                                                              | 1530 | 852704 | 853453 | 89.45260347 | 51.0680908 | 0.5709  |
| Uncharacterized membrane protein                                                                                         | 1529 | 853450 | 854406 | 46.0251046  | 16.4748954 | 0.35795 |
| 5'-nucleotidase/2',3'-cyclic phosphodiesterase and related esterases                                                     | 1528 | 854403 | 855887 | 28.97574124 | 7.58086253 | 0.26163 |
| hypothetical protein                                                                                                     | 1527 | 855880 | 856998 | 29.96422182 | 34.2128801 | 1.14179 |
| MoxR-like ATPase                                                                                                         | 1526 | 856995 | 858002 | 89.87090367 | 87.1400199 | 0.96961 |
| POSSIBLE CONSERVED MEMBRANE PROTEIN                                                                                      | 1525 | 858009 | 859349 | 43.65671642 | 33.5820896 | 0.76923 |
| NAD(P)H oxidoreductase YRKL (EC 1.6.99.-); Putative NADPH-quinone reductase (modulator of drug activity B); Flavodoxin 2 | 1524 | 859362 | 859952 | 46.61016949 | 22.8813559 | 0.49091 |
| Hydroxyethylthiazole kinase (EC 2.7.1.50)                                                                                | 1523 | 859970 | 860779 | 50.0618047  | 33.3745365 | 0.66667 |
| hypothetical protein                                                                                                     | 1522 | 860829 | 861203 | 28.07486631 | 18.0481283 | 0.64286 |
| hypothetical protein                                                                                                     | 1521 | 861296 | 861559 | 15.20912548 | 8.55513308 | 0.5625  |
| Predicted N6-adenine-specific RNA methylase containing THUMP domain                                                      | 1520 | 861615 | 862640 | 35.12195122 | 10.9756098 | 0.3125  |
| Ribonucleotide reductase of class II (coenzyme B12-dependent) (EC 1.17.4.1)                                              | 1519 | 862659 | 867281 | 97.74599046 | 124.837451 | 1.27716 |
| hypothetical protein                                                                                                     | 1518 | 867292 | 867432 | 14.28571429 | 16.0714286 | 1.125   |
| hypothetical protein                                                                                                     | 1517 | 867432 | 867587 | 90.32258065 | 29.0322581 | 0.32143 |
| hypothetical protein                                                                                                     | 1516 | 867690 | 867836 | 95.89041096 | 61.6438356 | 0.64286 |
| Cell surface protein                                                                                                     | 1515 | 867837 | 869153 | 38.37386018 | 11.9680851 | 0.31188 |
| Transposase (class II)                                                                                                   | 1514 | 869275 | 870306 | 37.82735209 | 21.8234724 | 0.57692 |
| Cell surface protein                                                                                                     | 1513 | 870413 | 873301 | 12.11911357 | 0          | 0       |
| hypothetical protein                                                                                                     | 1512 | 873375 | 873728 | 43.90934844 | 25.4957507 | 0.58065 |
| hypothetical protein                                                                                                     | 1511 | 873841 | 876009 | 69.18819188 | 51.8911439 | 0.75    |
| hypothetical protein                                                                                                     | 1510 | 876074 | 877204 | 77.43362832 | 49.7787611 | 0.64286 |
| RNA polymerase sigma-70 factor, group 3                                                                                  | 1509 | 877271 | 877582 | 48.23151125 | 7.23472669 | 0.15    |
| ActD                                                                                                                     |      | 877579 | 877890 | 32.15434084 | 0          | 0       |
| Ferrichrome-iron receptor                                                                                                | 1506 | 877902 | 879908 | 21.68494516 | 6.72981057 | 0.31034 |
| Virulence factor mviN homolog                                                                                            | 1507 | 879886 | 881478 | 38.31658291 | 9.89321608 | 0.2582  |

|                                                                                                     |      |        |        |             |            |         |
|-----------------------------------------------------------------------------------------------------|------|--------|--------|-------------|------------|---------|
| Glycerophosphoryl diester phosphodiesterase (EC 3.1.4.46)                                           | 1505 | 881471 | 882247 | 74.74226804 | 66.6881443 | 0.89224 |
| PspA/IM30 family protein                                                                            | 1504 | 882247 | 882741 | 78.94736842 | 50.1012146 | 0.63462 |
| Glycerate kinase (EC 2.7.1.31)                                                                      | 1503 | 882734 | 883876 | 115.58669   | 66.9877408 | 0.57955 |
| Putative predicted metal-dependent hydrolase                                                        | 1502 | 883914 | 884606 | 42.6300578  | 19.5086705 | 0.45763 |
| Alkanesulfonates ABC transporter ATP-binding protein                                                | 1501 | 884661 | 885443 | 44.75703325 | 11.5089514 | 0.25714 |
| Alkanesulfonates transport system permease protein                                                  | 1500 | 885440 | 886441 | 91.90809191 | 22.4775225 | 0.24457 |
| ABC-type nitrate/sulfonate/bicarbonate transport systems, periplasmic components                    | 1499 | 886456 | 887469 | 188.0552813 | 68.8548865 | 0.36614 |
| hypothetical protein                                                                                | 1498 | 887598 | 887873 | 23.63636364 | 8.18181818 | 0.34615 |
| O-acetylhomoserine sulfhydrylase (EC 4.2.99.10) / O-succinylhomoserine sulfhydrylase (EC 4.2.99.9)  | 1497 | 888099 | 889409 | 80.15267176 | 51.5267176 | 0.64286 |
| Nitrogenase (EC 1.18.6.1)                                                                           | 1496 | 889412 | 890878 | 70.94133697 | 47.5784447 | 0.67067 |
| Nitrogenase (EC 1.18.6.1)                                                                           | 1495 | 890882 | 892234 | 61.76035503 | 34.9482249 | 0.56587 |
| Histone acetyltransferase HPA2 and related acetyltransferases                                       | 1494 | 892255 | 892725 | 2.127659574 | 0          | 0       |
| hypothetical protein                                                                                | 1493 | 892719 | 892850 | 7.633587786 | 17.1755725 | 2.25    |
| transposase, mutator family                                                                         | 1492 | 893082 | 894323 | 55.19742143 | 43.5132957 | 0.78832 |
| Transcriptional regulator, MarR family                                                              | 1491 | 894397 | 894735 | 35.50295858 | 19.9704142 | 0.5625  |
| Transposase                                                                                         | 1490 | 895015 | 896124 | 40.57709648 | 16.2308386 | 0.4     |
| hypothetical protein                                                                                | 1488 | 896188 | 896529 | 10.26392962 | 0          | 0       |
| FeMo cofactor biosynthesis protein NifB                                                             | 1489 | 896526 | 897446 | 58.15217391 | 2.44565217 | 0.04206 |
| Nitrogenase iron protein (EC 1.18.6.1)                                                              | 1487 | 897462 | 898340 | 154.3280182 | 30.7517084 | 0.19926 |
| Cysteine synthase (EC 2.5.1.47)                                                                     | 1486 | 898388 | 899338 | 94.21052632 | 16.5789474 | 0.17598 |
| hypothetical protein                                                                                | 1485 | 899391 | 899528 | 0           | 0          | #DIV/0! |
| ABC-type nitrate/sulfonate/bicarbonate transport systems, periplasmic components                    | 1484 | 899596 | 900666 | 56.07476636 | 8.41121495 | 0.15    |
| ABC-type nitrate/sulfonate/bicarbonate transport system, ATPase component                           | 1483 | 900753 | 901589 | 31.10047847 | 0          | 0       |
| ABC-type nitrate/sulfonate/bicarbonate transport system, permease component                         | 1482 | 901586 | 902521 | 13.90374332 | 4.81283422 | 0.34615 |
| Methylcobalamin:coenzyme M methyltransferase, methylamine-specific                                  | 1481 | 902532 | 903575 | 24.44870566 | 4.31447747 | 0.17647 |
| Nitrogenase (EC 1.18.6.1)                                                                           | 1480 | 903568 | 905073 | 15.28239203 | 1.49501661 | 0.09783 |
| Nitrogenase vanadium-cofactor synthesis protein VnfN                                                | 1479 | 905073 | 906470 | 23.62204724 | 3.22118826 | 0.13636 |
| Dimethylamine methyltransferase corrinoid protein                                                   | 1478 | 906483 | 907145 | 34.74320242 | 13.5951662 | 0.3913  |
| Methylcobalamin:coenzyme M methyltransferase, methylamine-specific                                  | 1477 | 907145 | 908179 | 30.46421663 | 0          | 0       |
| probable electron transfer protein                                                                  | 1476 | 908181 | 909800 | 22.85361334 | 0          | 0       |
| Methylcobalamin:coenzyme M methyltransferase, methylamine-specific                                  | 1475 | 909806 | 910645 | 17.28247914 | 2.681764   | 0.15517 |
| Predicted molybdate-responsive regulator YvgK in bacilli                                            | 1474 | 910694 | 911605 | 31.28430296 | 7.40944018 | 0.23684 |
| Spermidine/putrescine-binding protein                                                               | 1473 | 911612 | 912655 | 32.11888782 | 17.2579099 | 0.53731 |
| ABC transporter, ATP-binding protein                                                                | 1472 | 912657 | 913448 | 22.12389381 | 14.2225032 | 0.64286 |
| Ni <sup>2+</sup> -binding GTPase involved in regulation of expression and maturation of hydrogenase | 1471 | 913441 | 914163 | 31.1634349  | 9.34903047 | 0.3     |

|                                                                                 |      |        |        |             |            |         |
|---------------------------------------------------------------------------------|------|--------|--------|-------------|------------|---------|
| methlytransferase, UbiE/COQ5 family                                             | 1470 | 914160 | 914801 | 42.90171607 | 14.0405616 | 0.32727 |
| Molybdenum transport ATP-binding protein modC (TC 3.A.1.8.1)                    | 1469 | 914788 | 915537 | 36.04806409 | 24.0320427 | 0.66667 |
| BNR repeat domain protein                                                       | 1468 | 915698 | 916789 | 86.15948671 | 82.4931256 | 0.95745 |
| Uncharacterized protein with a C-terminal OMP (outer membrane protein) domain   | 1467 | 916841 | 918664 | 63.35710368 | 69.1168404 | 1.09091 |
| TonB-dependent receptor                                                         | 1466 | 918685 | 920823 | 19.87839102 | 4.20954163 | 0.21176 |
| Ferric siderophore transport system, periplasmic binding protein TonB           | 1465 | 920855 | 921484 | 109.6979332 | 85.8505564 | 0.78261 |
| ABC transporter, solute-binding protein                                         | 1464 | 921561 | 922631 | 42.52336449 | 27.3364486 | 0.64286 |
| Vitamin B12 ABC transporter, permease component BtuC                            | 1463 | 922621 | 923622 | 36.46353646 | 22.4775225 | 0.61644 |
| ABC transporter related                                                         | 1462 | 923619 | 924407 | 19.03553299 | 5.7106599  | 0.3     |
| Outer membrane lipoprotein omp16 precursor                                      | 1461 | 924472 | 925647 | 81.27659574 | 57.4468085 | 0.70681 |
| Ferritin-like protein 2                                                         | 1460 | 925723 | 926247 | 435.1145038 | 541.030534 | 1.24342 |
| hypothetical protein                                                            | 1459 | 926271 | 926387 | 60.34482759 | 19.3965517 | 0.32143 |
| Heat shock protein 60 family chaperone GroEL                                    | 1458 | 926411 | 928057 | 4053.918495 | 5684.95298 | 1.40234 |
| NAD binding oxidoreductase                                                      | 1457 | 928326 | 929324 | 250.501002  | 288.577154 | 1.152   |
| Ribonuclease HI (EC 3.1.26.4)                                                   | 1456 | 929330 | 929788 | 206.3318777 | 235.80786  | 1.14286 |
| Treponemal membrane protein A precursor (Antigen tmpA) (Membrane protein A)     | 1455 | 929914 | 931014 | 1138.181818 | 1210.90909 | 1.0639  |
| Treponemal membrane protein B precursor (Antigen tmpB)                          | 1454 | 931011 | 931961 | 2471.578947 | 1726.57895 | 0.69857 |
| ADP-ribose pyrophosphatase (EC 3.6.1.13)                                        | 1453 | 932029 | 932583 | 134.4765343 | 174.638989 | 1.29866 |
| Cytidylate kinase (EC 2.7.4.14)                                                 | 1452 | 932730 | 933551 | 244.2143727 | 219.244823 | 0.89776 |
| ATPase                                                                          | 1451 | 933591 | 934829 | 40.79159935 | 34.5315024 | 0.84653 |
| Integrase domain protein                                                        | 1450 | 934978 | 936213 | 57.89473684 | 10.9311741 | 0.18881 |
| Thermostable carboxypeptidase 1 (EC 3.4.17.19)                                  | 1448 | 936361 | 937893 | 216.383812  | 279.046997 | 1.28959 |
| hypothetical protein                                                            | 1449 | 937850 | 937972 | 65.57377049 | 36.8852459 | 0.5625  |
| hypothetical protein                                                            | 1447 | 938042 | 938497 | 140.6593407 | 118.681319 | 0.84375 |
| CDP-diacylglycerol--glycerol-3-phosphate 3-phosphatidyltransferase (EC 2.7.8.5) | 1446 | 938540 | 939124 | 43.66438356 | 26.9691781 | 0.61765 |
| hypothetical protein                                                            |      | 940960 | 941085 | 0           | 0          | #DIV/0! |
| hypothetical protein                                                            | 1443 | 941158 | 941277 | 0           | 0          | #DIV/0! |
| Hypothetical lipoprotein                                                        | 1439 | 944937 | 946172 | 926.7206478 | 1032.99595 | 1.11468 |
| tRNA nucleotidyltransferase, A-adding (EC 2.7.7.-)                              | 1438 | 946311 | 947654 | 65.89724497 | 55.2866716 | 0.83898 |
| Glycyl-tRNA synthetase (EC 6.1.1.14)                                            | 1437 | 947701 | 949074 | 346.6860889 | 358.885652 | 1.03519 |
| Fe-S oxidoreductase                                                             | 1435 | 949180 | 950775 | 37.93103448 | 22.5705329 | 0.59504 |
| Esterase/lipase                                                                 | 1436 | 950770 | 951972 | 42.01331115 | 33.6938436 | 0.80198 |
| Chloride channel protein                                                        |      | 951971 | 952882 | 48.84742042 | 27.1679473 | 0.55618 |
| Voltage-gated chloride channel                                                  |      | 952873 | 953292 | 53.69928401 | 21.4797136 | 0.4     |
| DNA polymerase II (EC 2.7.7.7)                                                  | 1432 | 953289 | 955760 | 36.44136808 | 14.6579805 | 0.40223 |
| oxidoreductase, short-chain                                                     |      |        |        |             |            |         |
| dehydrogenase/reductase family                                                  | 1431 | 955778 | 956545 | 106.2581486 | 76.2711864 | 0.71779 |
| SN-glycerol-3-phosphate transport system permease protein ugpA (TC 3.A.1.1.3)   | 1430 | 956604 | 957473 | 36.24856157 | 20.7134638 | 0.57143 |
| N-Acetyl-D-glucosamine ABC transport system, permease protein 2                 | 1429 | 957470 | 958309 | 49.4636472  | 34.8629321 | 0.70482 |

|                                                                                                                 |      |         |         |             |            |         |
|-----------------------------------------------------------------------------------------------------------------|------|---------|---------|-------------|------------|---------|
| Glycerol-3-phosphate ABC transporter, periplasmic glycerol-3-phosphate-binding protein (TC 3.A.1.1.3)           | 1428 | 958325  | 959698  | 219.592134  | 140.932265 | 0.64179 |
| Cardiolipin synthetase (EC 2.7.8.-)                                                                             |      | 959739  | 961235  | 86.56417112 | 75.2005348 | 0.86873 |
| YciO family                                                                                                     | 1426 | 961235  | 961855  | 182.2580645 | 163.306452 | 0.89602 |
| Uncharacterized protein TP_0552                                                                                 | 1425 | 961862  | 962305  | 130.9255079 | 132.054176 | 1.00862 |
| RNA polymerase sigma factor RpoD                                                                                | 1424 | 962528  | 963388  | 126.1627907 | 170.05814  | 1.34793 |
| Possible divergent polysaccharide deacetylase                                                                   | 1423 | 963436  | 964533  | 271.6499544 | 201.002735 | 0.73993 |
| Endopeptidase essential in most Bacteria (E. coli YgjD/B. subtilis YdiE)                                        | 1422 | 964533  | 965585  | 156.3688213 | 147.576046 | 0.94377 |
| Kef-type K <sup>+</sup> transport systems (NAD-binding component fused to domain related to exopolyphosphatase) | 1421 | 965600  | 966580  | 203.0612245 | 236.479592 | 1.16457 |
| LSU ribosomal protein L28p                                                                                      | 1419 | 966648  | 966839  | 1287.958115 | 2356.02094 | 1.82927 |
| Metal-dependent hydrolases of the beta-lactamase superfamily I; PhnP protein                                    | 1420 | 966823  | 967713  | 106.741573  | 106.179775 | 0.99474 |
| hypothetical protein                                                                                            | 1418 | 967746  | 967916  | 97.05882353 | 13.2352941 | 0.13636 |
| Alpha-L-fucosidase (EC 3.2.1.51)                                                                                | 1417 | 967952  | 969439  | 48.08338937 | 43.8802959 | 0.91259 |
| Xylose repressor XylR (ROK family)                                                                              | 1416 | 969440  | 970654  | 45.30477759 | 20.3871499 | 0.45    |
| Hypothetical zinc-type alcohol dehydrogenase-like protein YphC                                                  | 1415 | 970717  | 971778  | 137.606032  | 122.997172 | 0.89384 |
| Aldo-keto reductase family 1 member B10 (EC 1.1.1.-)                                                            | 1414 | 971778  | 972791  | 213.2280355 | 153.257651 | 0.71875 |
| Uncharacterized protein TP_0677                                                                                 | 1413 | 972849  | 973424  | 180         | 117.391304 | 0.65217 |
| ABC transporter, periplasmic spermidine putrescine-binding protein potD (TC_3.A.1.11.1)                         | 1412 | 973460  | 974512  | 223.8593156 | 295.152091 | 1.31847 |
| Spermidine Putrescine ABC transporter permease component potC (TC_3.A.1.11.1)                                   | 1411 | 974531  | 975400  | 71.92174914 | 124.280783 | 1.728   |
| Spermidine Putrescine ABC transporter permease component potB (TC_3.A.1.11.1)                                   | 1410 | 975397  | 976299  | 63.74722838 | 87.3059867 | 1.36957 |
| Spermidine Putrescine transport ATP-binding protein potA (TC_3.A.1.11.1)                                        | 1409 | 976299  | 977432  | 267.493357  | 312.887511 | 1.1697  |
| Possible DNA-binding protein                                                                                    | 1408 | 977542  | 980652  | 94.69453376 | 86.0932476 | 0.90917 |
| Acetylornithine deacetylase (EC 3.5.1.16)                                                                       | 1407 | 980687  | 981910  | 181.5208504 | 167.41619  | 0.9223  |
| UDP-glucose 4-epimerase (EC 5.1.3.2)                                                                            | 1406 | 981900  | 982913  | 220.1382034 | 244.323791 | 1.10987 |
| hypothetical protein                                                                                            | 1405 | 983473  | 984132  | 578.1487102 | 949.165402 | 1.64173 |
| COG0488: ATPase components of ABC transporters with duplicated ATPase domains                                   | 1404 | 984199  | 986283  | 144.6737044 | 134.956814 | 0.93284 |
| Uncharacterized protein TP_0260                                                                                 | 1403 | 986287  | 987834  | 191.6612799 | 191.984486 | 1.00169 |
| hypothetical protein                                                                                            |      | 987873  | 990200  | 197.6794156 | 129.565965 | 0.65543 |
| Alpha-mannosidase (EC 3.2.1.24)                                                                                 | 1401 | 990207  | 993023  | 166.5482955 | 142.223011 | 0.85394 |
| hypothetical protein                                                                                            | 1400 | 993124  | 994161  | 120.0578592 | 112.825458 | 0.93976 |
| Probable HIT family protein                                                                                     | 1399 | 994171  | 994515  | 188.9534884 | 209.302326 | 1.10769 |
| sensory box histidine kinase/response regulator                                                                 | 1397 | 994475  | 996850  | 95.57894737 | 94.7368421 | 0.99119 |
| tRNA uridine 5-carboxymethylaminomethyl modification enzyme gidA                                                | 1398 | 996841  | 998631  | 55.30726257 | 41.4804469 | 0.75    |
| Alpha-xylosidase (EC 3.2.1.-)                                                                                   | 1396 | 998670  | 1000679 | 64.21105027 | 49.2782479 | 0.76744 |
| Na <sup>+</sup> driven multidrug efflux pump                                                                    | 1395 | 1000680 | 1002035 | 50.55350554 | 31.5498155 | 0.62409 |
| GTPase and tRNA-U34 5-formylation enzyme TrmE                                                                   | 1394 | 1002063 | 1003586 | 51.54300722 | 31.0242942 | 0.60191 |



|                                                                                                                        |         |         |             |             |            |         |
|------------------------------------------------------------------------------------------------------------------------|---------|---------|-------------|-------------|------------|---------|
| Phosphatidylglycerophosphatase B (EC 3.1.3.27)                                                                         | 1393    | 1003586 | 1004599     | 52.81342547 | 39.9802567 | 0.75701 |
| hypothetical protein                                                                                                   | 1392    | 1004609 | 1005319     | 17.6056338  | 3.16901408 | 0.18    |
| hypothetical protein                                                                                                   | 1391    | 1005316 | 1006869     | 28.33226014 | 23.1809401 | 0.81818 |
| Alanine racemase (EC 5.1.1.1)                                                                                          | 1390    | 1006944 | 1008041     | 79.76298997 | 73.8377393 | 0.92571 |
| Formate--tetrahydrofolate ligase (EC 6.3.4.3)                                                                          | 1389    | 1008038 | 1009777     | 90.28177113 | 77.6308223 | 0.85987 |
| ATP-dependent Clp protease proteolytic subunit (EC 3.4.21.92)                                                          | 1388    | 1009817 | 1010602     | 458.5987261 | 601.910828 | 1.3125  |
| Peptidyl-tRNA hydrolase (EC 3.1.1.29)                                                                                  | 1387    | 1010655 | 1011248     | 193.0860034 | 295.952782 | 1.53275 |
| Beta-lactamase class C and other penicillin binding proteins                                                           | 1386    | 1011324 | 1012718     | 71.37733142 | 75.8608321 | 1.06281 |
| hypothetical protein                                                                                                   | 1385    | 1012720 | 1013583     | 91.54113557 | 70.3939745 | 0.76899 |
| tetrapyrrole methylase family protein/MazG family protein                                                              | 1383    | 1013587 | 1014369     | 91.43222506 | 46.0358056 | 0.5035  |
| B. burgdorferi predicted coding region BB0351                                                                          | 1384    | 1014362 | 1015906     | 215.6735751 | 234.617876 | 1.08784 |
| Pyruvate-flavodoxin oxidoreductase (EC 1.2.7.-)                                                                        | 1382    | 1015967 | 1019530     | 949.1910304 | 1174.49617 | 1.23737 |
| NADH-dependent butanol dehydrogenase A (EC 1.1.1.-)                                                                    | 1381    | 1019630 | 1020832     | 217.9700499 | 211.522463 | 0.97042 |
| hypothetical protein                                                                                                   | 1380    | 1020899 | 1021042     | 34.96503497 | 31.4685315 | 0.9     |
| Conserved domain protein                                                                                               | 1379    | 1021071 | 1021367     | 16.89189189 | 7.60135135 | 0.45    |
| Prevent-host-death family protein                                                                                      | 1378    | 1021357 | 1021641     | 61.61971831 | 39.6126761 | 0.64286 |
| hypothetical protein                                                                                                   | 1377    | 1021631 | 1021780     | 33.55704698 | 15.1006711 | 0.45    |
| hypothetical protein                                                                                                   | 1376    | 1021940 | 1022266     | 49.0797546  | 55.2147239 | 1.125   |
| Mucin-associated surface protein                                                                                       | 1375    | 1022409 | 1022990     | 1113.597246 | 1095.95525 | 0.98416 |
| hypothetical protein                                                                                                   | 1374    | 1023076 | 1025529     | 43.82388912 | 34.8552792 | 0.79535 |
| hypothetical protein                                                                                                   | 1373    | 1025583 | 1026671     | 97.42647059 | 122.012868 | 1.25236 |
| Glucosamine-6-phosphate deaminase (EC 3.5.99.6)                                                                        | 1372    | 1026679 | 1027470     | 189.6333755 | 270.22756  | 1.425   |
| N-acetylglucosamine-6-phosphate deacetylase (EC 3.5.1.25)                                                              | 1371    | 1027486 | 1028640     | 248.7001733 | 306.109185 | 1.23084 |
| Anaerobic nitric oxide reductase flavorubredoxin                                                                       | 1028727 | 1029734 | 238.3316783 | 321.747766  | 1.35       |         |
| Metallo-beta-lactamase family protein                                                                                  | 1029797 | 1029940 | 293.7062937 | 534.965035  | 1.82143    |         |
| Chemotaxis regulator - transmits chemoreceptor signals to flagellar motor components CheY                              | 1368    | 1029999 | 1030436     | 337.5286041 | 324.370709 | 0.96102 |
| tRNA dihydrouridine synthase B (EC 1.-.-.-)                                                                            | 1367    | 1030408 | 1031577     | 101.7964072 | 90.4619333 | 0.88866 |
| D-3-phosphoglycerate dehydrogenase (EC 1.1.1.95)                                                                       | 1366    | 1031583 | 1032554     | 81.87435633 | 71.8331617 | 0.87736 |
| Adenylate kinase (EC 2.7.4.3)                                                                                          | 1365    | 1032575 | 1033201     | 447.284345  | 456.469649 | 1.02054 |
| Metal transporter, ZIP family                                                                                          | 1364    | 1033290 | 1034105     | 134.9693252 | 110.429448 | 0.81818 |
| hypothetical protein                                                                                                   | 1363    | 1034153 | 1034704     | 70.78039927 | 65.3357532 | 0.92308 |
| L-rhamnose isomerase (EC 5.3.1.14)                                                                                     | 1362    | 1034799 | 1036034     | 510.5263158 | 615.789474 | 1.20619 |
| Rhamnulokinase (EC 2.7.1.5)                                                                                            | 1361    | 1036071 | 1037474     | 255.8802566 | 362.437634 | 1.41643 |
| Pheromone shutdown protein                                                                                             | 1360    | 1037497 | 1038696     | 175.5629691 | 217.681401 | 1.2399  |
| TPR repeat                                                                                                             | 1038716 | 1040155 | 141.0701876 | 217.338429  | 1.54064    |         |
| hypothetical protein                                                                                                   | 1358    | 1040253 | 1042061     | 102.8761062 | 78.4015487 | 0.7621  |
| TPR domain protein                                                                                                     | 1357    | 1042064 | 1044289     | 54.83146067 | 47.5280899 | 0.8668  |
| Aspartyl-tRNA(Asn) amidotransferase subunit B (EC 6.3.5.-); Glutamyl-tRNA(Gln) amidotransferase subunit B (EC 6.3.5.-) | 1356    | 1044301 | 1046748     | 94.80997139 | 94.7078055 | 0.99892 |

|                                                                                               |      |         |         |             |            |         |
|-----------------------------------------------------------------------------------------------|------|---------|---------|-------------|------------|---------|
| hypothetical protein                                                                          | 1355 | 1046787 | 1046900 | 35.39823009 | 0          | 0       |
| Trehalase (EC 3.2.1.28)                                                                       | 1354 | 1046983 | 1048407 | 268.5512367 | 512.014134 | 1.90658 |
| Superfamily II DNA/RNA helicases, SNF2 family                                                 | 1353 | 1048812 | 1049270 | 43.66812227 | 14.7379913 | 0.3375  |
| Exopolyphosphatase (EC 3.6.1.11)                                                              | 1352 | 1049412 | 1050944 | 125.9791123 | 93.9947781 | 0.74611 |
| Polyphosphate kinase (EC 2.7.4.1)                                                             | 1351 | 1050956 | 1053082 | 86.99763593 | 88.2978723 | 1.01495 |
| COG1092 family predicted tRNA methylase                                                       | 1350 | 1053084 | 1054418 | 179.1604198 | 114.692654 | 0.64017 |
| Na <sup>+</sup> /H <sup>+</sup> antiporter                                                    | 1349 | 1054512 | 1056605 | 68.08408982 | 55.9006211 | 0.82105 |
| hypothetical protein                                                                          | 1348 | 1056627 | 1057235 | 65.78947368 | 25.9046053 | 0.39375 |
| DNA polymerase III delta subunit (EC 2.7.7.7)                                                 | 1347 | 1057243 | 1058223 | 104.5918367 | 130.867347 | 1.25122 |
| SOS-response repressor and protease LexA (EC 3.4.21.88)                                       | 1346 | 1058220 | 1058846 | 405.7507987 | 427.715655 | 1.05413 |
| Two component, sigma54 specific, transcriptional regulator, Fis family                        | 1345 | 1058857 | 1060248 | 89.50395399 | 63.0841121 | 0.70482 |
| Nitrogen regulation protein NtrY                                                              | 1344 | 1060245 | 1062002 | 52.64655663 | 46.101309  | 0.87568 |
| Phosphocarrier protein, nitrogen regulation associated                                        | 1343 | 1061999 | 1062265 | 148.4962406 | 219.924812 | 1.48101 |
| HPr kinase/phosphorylase (EC 2.7.1.-) (EC 2.7.4.-)                                            | 1342 | 1062277 | 1063266 | 216.8857432 | 270.728008 | 1.24825 |
| hypothetical protein                                                                          | 1341 | 1063279 | 1063392 | 17.69911504 | 0          | 0       |
| Amino-acid ABC transporter ATP-binding protein PebC                                           | 1340 | 1063367 | 1064089 | 128.1163435 | 190.096953 | 1.48378 |
| Major cell-binding factor precursor PebA                                                      | 1339 | 1064104 | 1064907 | 264.6326276 | 308.219178 | 1.16471 |
| Putative ABC-type amino-acid transporter permease protein                                     | 1338 | 1064926 | 1065645 | 109.8748261 | 134.561892 | 1.22468 |
| Putative ABC-type amino-acid transporter permease protein                                     | 1337 | 1065642 | 1066334 | 34.68208092 | 42.2687861 | 1.21875 |
| hypothetical protein                                                                          | 1336 | 1066747 | 1066986 | 89.958159   | 94.1422594 | 1.04651 |
| Conserved domain protein                                                                      | 1335 | 1067094 | 1067969 | 77.71428571 | 90         | 1.15809 |
| ATP-dependent DNA helicase RecQ                                                               | 1334 | 1068058 | 1069653 | 29.78056426 | 1.41065831 | 0.04737 |
| hypothetical protein                                                                          | 1333 | 1069630 | 1069746 | 4.310344828 | 0          | 0       |
| Cystine-binding periplasmic protein precursor                                                 | 1332 | 1069829 | 1070644 | 363.190184  | 303.680982 | 0.83615 |
| Amino acid ABC transporter, permease protein, 3-TM region, His/Glu/Gln/Arg/opine              | 1331 | 1070659 | 1071336 | 158.0502216 | 112.998523 | 0.71495 |
| Glutamine transport ATP-binding protein glnQ (TC 3.A.1.3.2)                                   | 1330 | 1071352 | 1072110 | 209.762533  | 189.973615 | 0.90566 |
| Indolepyruvate oxidoreductase subunit iorA (EC 1.2.7.8)                                       | 1329 | 1072107 | 1074137 | 117.2413793 | 90.8866995 | 0.77521 |
| Indolepyruvate oxidoreductase, subunit B                                                      | 1328 | 1074134 | 1074751 | 115.0729335 | 105.753647 | 0.91901 |
| Phenylacetate-coenzyme A ligase (EC 6.2.1.30); Coenzyme F390 synthetase                       | 1327 | 1074838 | 1076067 | 43.93816111 | 75.0610252 | 1.70833 |
| Branched-chain amino acid transport ATP-binding protein livF (TC 3.A.1.4.1)                   | 1326 | 1076094 | 1076834 | 102.7027027 | 136.824324 | 1.33224 |
| Branched-chain amino acid transport ATP-binding protein livG (TC 3.A.1.4.1)                   | 1325 | 1076844 | 1077617 | 62.09573092 | 98.9650712 | 1.59375 |
| Branched-chain amino acid transport system permease protein livM (TC 3.A.1.4.1)               | 1324 | 1077614 | 1078660 | 52.20306513 | 60.3448276 | 1.15596 |
| High-affinity branched-chain amino acid transport system permease protein LivH (TC 3.A.1.4.1) | 1323 | 1078668 | 1079579 | 47.59238522 | 52.9115342 | 1.11176 |
| Branched-chain amino acid ABC transporter, amino acid-binding protein (TC 3.A.1.4.1)          | 1322 | 1079598 | 1080764 | 329.7598628 | 364.708405 | 1.10598 |

|                                                                                                            |      |         |         |             |            |         |
|------------------------------------------------------------------------------------------------------------|------|---------|---------|-------------|------------|---------|
| Iron-sulfur cluster regulator IscR                                                                         | 1321 | 1080892 | 1081326 | 243.0875576 | 186.635945 | 0.76777 |
| Iron-sulfur cluster regulator IscR                                                                         | 1320 | 1081323 | 1081754 | 196.0556845 | 187.935035 | 0.95858 |
| Cystathionine gamma-synthase (EC 2.5.1.48)                                                                 | 1319 | 1081751 | 1082950 | 295.2460384 | 208.298582 | 0.70551 |
| Cystathionine beta-lyase (EC 4.4.1.8)                                                                      | 1318 | 1082988 | 1084148 | 324.137931  | 281.25     | 0.86769 |
| Carotenoid cis-trans isomerase (EC 5.2.-.-)                                                                | 1317 | 1084222 | 1085700 | 70.70365359 | 42.6251691 | 0.60287 |
| Sucrose transport protein                                                                                  | 1316 | 1085710 | 1087008 | 74.34514638 | 31.201849  | 0.41969 |
| GTP-binding and nucleic acid-binding protein YchF                                                          | 1315 | 1087033 | 1088163 | 161.0619469 | 225        | 1.39698 |
| ATP-dependent DNA helicase RecQ                                                                            | 1314 | 1088172 | 1090130 | 65.1174668  | 64.351379  | 0.98824 |
| cAMP-binding proteins - catabolite gene activator and regulatory subunit of cAMP-dependent protein kinases | 1313 | 1090194 | 1090643 | 142.5389755 | 175.389755 | 1.23047 |
| Phosphoenolpyruvate carboxykinase [GTP] (EC 4.1.1.32)                                                      | 1312 | 1090758 | 1092593 | 1541.21179  | 1720.66048 | 1.11643 |
| HtrA protease/chaperone protein                                                                            | 1311 | 1092665 | 1094362 | 77.78432528 | 60.9899823 | 0.78409 |
| Methyl-accepting chemotaxis protein                                                                        | 1310 | 1094976 | 1095431 | 179.1208791 | 360.989011 | 2.01534 |
| LL-diaminopimelate aminotransferase                                                                        | 1309 | 1095939 | 1097144 | 173.0290456 | 210.995851 | 1.21942 |
| Diaminopimelate decarboxylase (EC 4.1.1.20)                                                                | 1308 | 1097207 | 1098481 | 260.5965463 | 342.621664 | 1.31476 |
| Aspartate-semialdehyde dehydrogenase (EC 1.2.1.11)                                                         | 1307 | 1098478 | 1099578 | 257.7272727 | 259.772727 | 1.00794 |
| hypothetical protein                                                                                       | 1305 | 1099665 | 1100126 | 104.1214751 | 97.6138829 | 0.9375  |
| Dihydrodipicolinate synthase (EC 4.2.1.52)                                                                 | 1306 | 1100113 | 1101018 | 186.7403315 | 238.674033 | 1.27811 |
| Dihydrodipicolinate reductase (EC 1.3.1.26)                                                                | 1304 | 1101015 | 1101800 | 150.3184713 | 146.178344 | 0.97246 |
| Aspartokinase (EC 2.7.2.4)                                                                                 | 1303 | 1101810 | 1103150 | 127.8026906 | 164.798206 | 1.28947 |
| hypothetical protein                                                                                       | 1302 | 1103420 | 1103554 | 242.5373134 | 251.865672 | 1.03846 |
| hypothetical protein                                                                                       | 1301 | 1103595 | 1103807 | 247.6415094 | 382.075472 | 1.54286 |
| Ribonuclease II family protein                                                                             | 1299 | 1103937 | 1105910 | 99.84794729 | 101.495185 | 1.0165  |
| hypothetical protein                                                                                       | 1300 | 1105897 | 1106796 | 102.8921023 | 127.641824 | 1.24054 |
| hypothetical protein                                                                                       | 1298 | 1106799 | 1107950 | 89.48740226 | 107.515204 | 1.20146 |
| Chemotaxis protein CheA (EC 2.7.3.-)                                                                       | 1297 | 1108040 | 1110433 | 487.8711836 | 745.294856 | 1.52765 |
| Positive regulator of CheA protein activity (CheW)                                                         | 1296 | 1110458 | 1111807 | 487.3980726 | 878.984433 | 1.80342 |
| Chemotaxis protein CheX                                                                                    | 1295 | 1111845 | 1112330 | 972.0430108 | 1437.09677 | 1.47843 |
| Cell surface protein                                                                                       | 1293 | 1112471 | 1113376 | 95.5801105  | 77.0718232 | 0.80636 |
| LSU ribosomal protein L33p                                                                                 | 1291 | 1113659 | 1113805 | 2267.123288 | 3883.56164 | 1.71299 |
| Preprotein translocase subunit SecE (TC 3.A.5.1.1)                                                         | 1289 | 1113932 | 1114111 | 351.9553073 | 653.631285 | 1.85714 |
| Transcription antitermination protein NusG                                                                 | 1288 | 1114129 | 1114686 | 468.5816876 | 1009.87433 | 2.15517 |
| LSU ribosomal protein L11p (L12e)                                                                          | 1287 | 1114820 | 1115251 | 2354.988399 | 3659.51276 | 1.55394 |
| LSU ribosomal protein L1p (L10Ae)                                                                          | 1286 | 1115248 | 1115931 | 1262.079063 | 1769.03367 | 1.40168 |
| LSU ribosomal protein L10p (P0)                                                                            | 1285 | 1115933 | 1116481 | 1439.781022 | 2373.17518 | 1.64829 |
| LSU ribosomal protein L7/L12 (L23e)                                                                        | 1284 | 1116613 | 1116993 | 1002.631579 | 2007.23684 | 2.00197 |
| DNA-directed RNA polymerase beta subunit (EC 2.7.7.6)                                                      | 1283 | 1117146 | 1120781 | 497.3655019 | 1028.91015 | 2.06872 |
| DNA-directed RNA polymerase beta' subunit (EC 2.7.7.6)                                                     | 1282 | 1120792 | 1125546 | 545.7991156 | 1093.01958 | 2.0026  |
| Glutamine transport ATP-binding protein glnQ (TC 3.A.1.3.2)                                                | 1281 | 1125564 | 1126316 | 171.8538566 | 270.97429  | 1.57677 |
| amino acid ABC transporter, permease protein                                                               | 1280 | 1126332 | 1127033 | 97.71754636 | 118.758916 | 1.21533 |
| Amino acid ABC transporter, amino acid-binding protein                                                     | 1279 | 1127034 | 1127852 | 375.9168704 | 528.117359 | 1.40488 |
| Diaminopimelate epimerase homolog                                                                          | 1278 | 1127937 | 1128737 | 67.5        | 70.3125    | 1.04167 |

|                                                                                                                                       |      |         |         |             |            |         |
|---------------------------------------------------------------------------------------------------------------------------------------|------|---------|---------|-------------|------------|---------|
| hypothetical protein                                                                                                                  | 1277 | 1128802 | 1129743 | 82.35919235 | 117.162593 | 1.42258 |
| hypothetical protein                                                                                                                  | 1276 | 1129775 | 1129921 | 3.424657534 | 0          | 0       |
| hypothetical protein                                                                                                                  | 1275 | 1130118 | 1131407 | 4907.292475 | 10307.4088 | 2.10043 |
| Copper chaperone                                                                                                                      | 1274 | 1131692 | 1131892 | 552.5       | 427.5      | 0.77376 |
| hypothetical protein                                                                                                                  | 1273 | 1131864 | 1131983 | 8.403361345 | 0          | 0       |
| Acyltransferase domain protein                                                                                                        | 1272 | 1131989 | 1133338 | 78.94736842 | 91.7346182 | 1.16197 |
| Zinc ABC transporter, periplasmic-binding protein ZnuA                                                                                | 1271 | 1133316 | 1134272 | 99.89539749 | 98.8493724 | 0.98953 |
| Zinc ABC transporter, ATP-binding protein ZnuC                                                                                        | 1270 | 1134269 | 1135066 | 101.0037641 | 124.215809 | 1.22981 |
| Zinc ABC transporter, inner membrane permease protein ZnuB                                                                            | 1268 | 1135063 | 1135905 | 60.57007126 | 80.1662708 | 1.32353 |
| Sugar/maltose fermentation stimulation protein homolog                                                                                | 1269 | 1135891 | 1136937 | 49.71319312 | 36.5678776 | 0.73558 |
| Permease of the drug/metabolite transporter (DMT) superfamily                                                                         | 1267 | 1137086 | 1137988 | 69.84478936 | 94.789357  | 1.35714 |
| RlpA-like lipoprotein precursor                                                                                                       | 1266 | 1138024 | 1138806 | 317.7749361 | 304.987212 | 0.95976 |
| Transaldolase (EC 2.2.1.2)                                                                                                            | 1265 | 1138847 | 1139599 | 123.0053191 | 131.648936 | 1.07027 |
| Substrate-specific component TrpP of tryptophan ECF transporter                                                                       | 1264 | 1139679 | 1140248 | 81.72231986 | 102.811951 | 1.25806 |
| ATPase component of general energizing module of ECF transporters / ATPase component of general energizing module of ECF transporters |      | 1140263 | 1141117 | 69.08665105 | 39.5199063 | 0.57203 |
| ATPase component of general energizing module of ECF transporters / ATPase component of general energizing module of ECF transporters |      | 1141120 | 1141962 | 48.6935867  | 50.7719715 | 1.04268 |
| Transmembrane component of general energizing module of ECF transporters                                                              | 1261 | 1141959 | 1142720 | 30.22339028 | 23.653088  | 0.78261 |
| Fe-S-cluster-containing hydrogenase components 1                                                                                      | 1260 | 1142730 | 1143131 | 201.9950125 | 140.274314 | 0.69444 |
| Legionella vir region protein                                                                                                         | 1259 | 1143263 | 1144378 | 189.2376682 | 163.452915 | 0.86374 |
| Excinuclease ABC subunit B                                                                                                            | 1258 | 1144737 | 1146794 | 90.42294604 | 129.071463 | 1.42742 |
| hypothetical protein                                                                                                                  | 1257 | 1146929 | 1148062 | 37.51103266 | 25.8164166 | 0.68824 |
| hypothetical protein                                                                                                                  | 1256 | 1148199 | 1148768 | 981.5465729 | 1126.97715 | 1.14816 |
| hypothetical protein                                                                                                                  | 1255 | 1148770 | 1149609 | 44.69606675 | 61.6805721 | 1.38    |
| Putative lipoprotein                                                                                                                  | 1254 | 1149654 | 1150283 | 252.782194  | 343.402226 | 1.35849 |
| putative lipoprotein                                                                                                                  | 1253 | 1150304 | 1151629 | 75.09433962 | 98.490566  | 1.31156 |
| hypothetical protein                                                                                                                  | 1252 | 1151617 | 1152840 | 92.8045789  | 128.781684 | 1.38767 |
| Cell division protein ftsH (EC 3.4.24.-)                                                                                              | 1251 | 1152870 | 1154636 | 142.412231  | 159.258211 | 1.11829 |
| Beta-galactosidase (EC 3.2.1.23)                                                                                                      | 1250 | 1154734 | 1158063 | 186.5425053 | 274.406729 | 1.47101 |
| Prolyl-tRNA synthetase (EC 6.1.1.15)                                                                                                  | 1249 | 1158135 | 1159976 | 230.8527974 | 265.209125 | 1.14882 |
| serine/threonine protein phosphatase family protein                                                                                   | 1248 | 1160050 | 1161399 | 66.34544107 | 48.3691623 | 0.72905 |
| hypothetical protein                                                                                                                  | 1247 | 1161519 | 1161815 | 128.3783784 | 167.22973  | 1.30263 |
| Predicted cell-wall-anchored protein SasA (LPXTG motif)                                                                               |      | 1161944 | 1162945 | 31.46853147 | 17.982018  | 0.57143 |
| Conserved domain protein                                                                                                              | 1245 | 1163290 | 1163598 | 27.5974026  | 0          | 0       |
| hypothetical protein                                                                                                                  | 1244 | 1163639 | 1163770 | 0           | 0          | #DIV/0! |
| hypothetical protein                                                                                                                  | 1243 | 1163809 | 1164822 | 17.76900296 | 0          | 0       |

|                                                                                                                |      |         |         |             |            |         |
|----------------------------------------------------------------------------------------------------------------|------|---------|---------|-------------|------------|---------|
| TPR domain protein, putative component of TonB system                                                          | 1242 | 1164825 | 1165496 | 20.86438152 | 0          | 0       |
| hypothetical protein                                                                                           | 1241 | 1165493 | 1166002 | 14.73477407 | 0          | 0       |
| Type I secretion outer membrane protein, TolC precursor                                                        | 1240 | 1166002 | 1167381 | 25.01812908 | 1.63161711 | 0.06522 |
| Probable Co/Zn/Cd efflux system membrane fusion protein                                                        | 1239 | 1167406 | 1168743 | 14.58489155 | 1.6828721  | 0.11538 |
| hypothetical protein                                                                                           | 1238 | 1169045 | 1170196 | 22.589053   | 0          | 0       |
| conserved hypothetical lipoprotein                                                                             | 1237 | 1170186 | 1171730 | 14.24870466 | 0          | 0       |
| RND multidrug efflux transporter; Acriflavin resistance protein                                                | 1236 | 1171739 | 1174789 | 19.01639344 | 2.95081967 | 0.15517 |
| RND multidrug efflux transporter; Acriflavin resistance protein                                                | 1235 | 1174782 | 1177769 | 12.55440241 | 0          | 0       |
| hypothetical protein                                                                                           | 1234 | 1177792 | 1179999 | 14.72587222 | 0          | 0       |
| Chromosome partition protein smc                                                                               | 1233 | 1180087 | 1186572 | 10.40863531 | 1.73477255 | 0.16667 |
| hypothetical protein                                                                                           | 1232 | 1186583 | 1187047 | 2.155172414 | 0          | 0       |
| 5'-methylthioadenosine phosphorylase (EC 2.4.2.28)                                                             | 1231 | 1187090 | 1187836 | 270.1072386 | 340.817694 | 1.26179 |
| hypothetical protein                                                                                           | 1230 | 1187849 | 1188451 | 185.2159468 | 246.677741 | 1.33184 |
| Methylthioribose-1-phosphate isomerase (EC 5.3.1.23)                                                           | 1229 | 1188441 | 1189559 | 251.3416816 | 326.028623 | 1.29715 |
| Acetyl-coenzyme A carboxyl transferase alpha chain (EC 6.4.1.2)                                                | 1228 | 1189590 | 1190510 | 492.9347826 | 645.652174 | 1.30981 |
| Acetyl-coenzyme A carboxyl transferase beta chain (EC 6.4.1.2)                                                 | 1227 | 1190510 | 1191289 | 510.9114249 | 563.22208  | 1.10239 |
| Biotin carboxylase of acetyl-CoA carboxylase (EC 6.3.4.14)                                                     | 1226 | 1191279 | 1192616 | 568.4367988 | 637.808527 | 1.12204 |
| Biotin carboxyl carrier protein of acetyl-CoA carboxylase                                                      | 1225 | 1192626 | 1193084 | 641.9213974 | 805.676856 | 1.2551  |
| Short-chain alcohol dehydrogenase family (3R)-hydroxymyristoyl-[acyl carrier protein] dehydratase (EC 4.2.1.-) | 1224 | 1193081 | 1194349 | 555.5993691 | 640.57571  | 1.15295 |
| 3-oxoacyl-[acyl-carrier-protein] synthase, KASII (EC 2.3.1.41)                                                 | 1222 | 1194776 | 1196056 | 739.0625    | 796.289063 | 1.07743 |
| 3-oxoacyl-[acyl-carrier protein] reductase (EC 1.1.1.100)                                                      | 1221 | 1196069 | 1196803 | 497.9310345 | 642.413793 | 1.29017 |
| Malonyl CoA-acyl carrier protein transacylase (EC 2.3.1.39)                                                    | 1220 | 1196822 | 1197787 | 391.1917098 | 424.352332 | 1.08477 |
| 3-oxoacyl-[acyl-carrier-protein] synthase, KASIII (EC 2.3.1.41)                                                | 1219 | 1197831 | 1198856 | 664.8780488 | 627.804878 | 0.94424 |
| hypothetical protein                                                                                           | 1218 | 1198992 | 1199723 | 132.6949384 | 144.664843 | 1.09021 |
| Uncharacterized protein TP_0273                                                                                | 1217 | 1199744 | 1200517 | 190.8150065 | 180.465718 | 0.94576 |
| hypothetical protein                                                                                           | 1216 | 1200553 | 1200810 | 2163.424125 | 2425.09728 | 1.12095 |
| hypothetical protein                                                                                           | 1215 | 1200918 | 1201808 | 52.80898876 | 15.1685393 | 0.28723 |
| SSU ribosomal protein S21p                                                                                     | 1214 | 1201828 | 1202001 | 526.0115607 | 1417.63006 | 2.69505 |
| Membrane proteins related to metalloendopeptidases                                                             | 1213 | 1202079 | 1203203 | 127.6690391 | 146.129893 | 1.1446  |
| Single-stranded-DNA-specific exonuclease recJ (EC 3.1.-.-)                                                     | 1212 | 1203200 | 1205341 | 131.2470808 | 139.771135 | 1.06495 |
| Pyrimidine-nucleoside phosphorylase (EC 2.4.2.2)                                                               | 1211 | 1205338 | 1206648 | 136.6412214 | 142.557252 | 1.0433  |
| Recombination protein O                                                                                        | 1210 | 1206666 | 1207403 | 113.2971506 | 91.587517  | 0.80838 |



|                                                                        |      |         |         |             |            |         |
|------------------------------------------------------------------------|------|---------|---------|-------------|------------|---------|
| Uncharacterized protein TP_0285                                        | 1209 | 1207467 | 1209059 | 66.89698492 | 70.6658291 | 1.05634 |
| hypothetical protein                                                   | 1208 | 1209127 | 1210056 | 52.20667384 | 53.2831001 | 1.02062 |
| N-Acetylneuraminatase cytidyltransferase (EC 2.7.7.43)                 | 1207 | 1210053 | 1210733 | 133.8235294 | 119.117647 | 0.89011 |
| Cytidyltransferase domain protein                                      |      | 1210730 | 1212523 | 46.01226994 | 27.607362  | 0.6     |
| Carbamoyl-phosphate synthase large chain (EC 6.3.5.5)                  | 1205 | 1212584 | 1214143 | 91.08402822 | 60.6157793 | 0.66549 |
| N-acetylmuramoyl-L-alanine amidase                                     | 1204 | 1214140 | 1215204 | 78.94736842 | 46.5225564 | 0.58929 |
| hypothetical protein                                                   | 1203 | 1215201 | 1215758 | 211.8491921 | 282.764811 | 1.33475 |
| Flagellar filament outer layer protein precursor (Sheath protein)      | 1202 | 1215834 | 1216868 | 3212.282398 | 4308.51064 | 1.34126 |
| GTP pyrophosphokinase (EC 2.7.6.5)                                     | 1200 | 1216967 | 1218190 | 88.71627146 | 158.217498 | 1.78341 |
| Na <sup>+</sup> -driven multidrug efflux pump                          | 1201 | 1218156 | 1219520 | 30.05865103 | 14.8460411 | 0.4939  |
| Dipeptide transport ATP-binding protein dppF (TC 3.A.1.5.2)            | 1199 | 1219537 | 1220370 | 53.42136855 | 10.8043217 | 0.20225 |
| Dipeptide transport ATP-binding protein dppD (TC 3.A.1.5.2)            | 1198 | 1220357 | 1221406 | 54.81410867 | 36.4632984 | 0.66522 |
| DppC-3 ABC transporter, permease component                             | 1197 | 1221409 | 1222380 | 59.21730175 | 32.4407827 | 0.54783 |
| Dipeptide transport system permease protein dppB (TC 3.A.1.5.2)        | 1196 | 1222382 | 1223395 | 46.39684107 | 46.6436328 | 1.00532 |
| Oligopeptide ABC transporter, periplasmic oligopeptide-binding protein | 1195 | 1223457 | 1225220 | 153.7152581 | 151.871809 | 0.98801 |
| hypothetical protein                                                   | 1194 | 1225286 | 1226284 | 29.05811623 | 24.7995992 | 0.85345 |
| Trimethylamine corrinoid protein 2                                     | 1193 | 1226281 | 1227339 | 29.30056711 | 19.1398866 | 0.65323 |
| oligopeptide ABC transporter, periplasmic oligopeptide-binding protein | 1192 | 1227424 | 1229196 | 198.6455982 | 159.988713 | 0.8054  |
| hypothetical protein                                                   | 1191 | 1229354 | 1231375 | 109.351806  | 80.1583375 | 0.73303 |
| hypothetical protein                                                   | 1190 | 1231956 | 1233185 | 48.82017901 | 18.3075671 | 0.375   |
| Anthranilate phosphoribosyltransferase (EC 2.4.2.18)                   | 1189 | 1233223 | 1234503 | 103.125     | 110.742188 | 1.07386 |
| 4-hydroxythreonine-4-phosphate dehydrogenase (EC 1.1.1.262)            | 1188 | 1234497 | 1235558 | 158.3411876 | 148.444863 | 0.9375  |
| hypothetical protein                                                   | 1187 | 1235559 | 1236122 | 476.0213144 | 563.499112 | 1.18377 |
| TPR domain protein, putative component of TonB system                  | 1186 | 1236213 | 1238036 | 117.1146462 | 123.422929 | 1.05386 |
| Phosphate acetyltransferase (EC 2.3.1.8)                               | 1185 | 1238174 | 1239169 | 761.3065327 | 682.914573 | 0.89703 |
| hypothetical protein                                                   | 1184 | 1239197 | 1239313 | 8.620689655 | 0          | 0       |
| hypothetical protein                                                   | 1183 | 1239332 | 1239541 | 0           | 0          | #DIV/0! |
| hypothetical protein                                                   | 1182 | 1239634 | 1240242 | 711.3486842 | 1324.83553 | 1.86243 |
| hypothetical protein                                                   | 1181 | 1240610 | 1240975 | 246.5753425 | 258.90411  | 1.05    |
| TPR domain protein                                                     | 1180 | 1240972 | 1241595 | 166.9341894 | 292.536116 | 1.7524  |
| MiaB family protein, possibly involved in tRNA or rRNA modification    | 1179 | 1241601 | 1242983 | 86.46888567 | 86.2879884 | 0.99791 |
| hypothetical protein                                                   | 1178 | 1243030 | 1243791 | 352.1681997 | 360.709593 | 1.02425 |
| hypothetical protein                                                   | 1177 | 1243803 | 1244966 | 130.266552  | 174.118659 | 1.33663 |
| Quinolinate phosphoribosyltransferase [decarboxylating] (EC 2.4.2.19)  | 1175 | 1245472 | 1246314 | 26.12826603 | 24.0498812 | 0.92045 |
| hypothetical protein                                                   | 1174 | 1246349 | 1247113 | 24.86910995 | 29.4502618 | 1.18421 |
| hypothetical protein                                                   | 1173 | 1247115 | 1247912 | 21.32998745 | 16.9385194 | 0.79412 |
| Multicopper oxidase                                                    | 1172 | 1247925 | 1249382 | 23.33562114 | 16.9869595 | 0.72794 |
| hypothetical protein                                                   | 1171 | 1249409 | 1250824 | 56.18374558 | 52.4734982 | 0.93396 |

|                                                                         |      |         |         |             |            |         |
|-------------------------------------------------------------------------|------|---------|---------|-------------|------------|---------|
| hypothetical protein                                                    | 1170 | 1250905 | 1251705 | 56.25       | 39.375     | 0.7     |
| hypothetical protein                                                    | 1169 | 1251727 | 1252704 | 27.12384852 | 16.1207779 | 0.59434 |
| Periplasmic binding protein precursor                                   | 1168 | 1252701 | 1253846 | 34.93449782 | 17.6855895 | 0.50625 |
| Vitamin B12 ABC transporter, permease component BtuC                    | 1167 | 1253847 | 1254926 | 24.09638554 | 6.2557924  | 0.25962 |
| Vitamin B12 ABC transporter, permease component BtuC                    | 1166 | 1254929 | 1255954 | 27.80487805 | 8.7804878  | 0.31579 |
| Iron ABC transporter, ATP-binding protein                               | 1165 | 1255945 | 1256742 | 26.9761606  | 5.64617315 | 0.2093  |
| Fibronectin type III domain protein                                     | 1164 | 1257156 | 1262294 | 29.58349552 | 3.94122227 | 0.13322 |
| hypothetical protein                                                    | 1163 | 1262310 | 1263083 | 29.7542044  | 2.91073739 | 0.09783 |
| Fibronectin type III domain protein                                     | 1162 | 1263268 | 1267059 | 23.60854656 | 4.74808758 | 0.20112 |
| hypothetical protein                                                    | 1161 | 1267167 | 1267298 | 0           | 0          | #DIV/0! |
| hypothetical protein                                                    | 1160 | 1267443 | 1268177 | 78.33787466 | 91.9618529 | 1.17391 |
| DNA polymerase IV (EC 2.7.7.7)                                          | 1159 | 1268245 | 1269414 | 56.03079555 | 26.9461078 | 0.48092 |
| Oxidoreductase, short chain dehydrogenase/reductase family              | 1158 | 1269449 | 1270237 | 786.1675127 | 759.517766 | 0.9661  |
| FOG: CheY-like receiver                                                 | 1157 | 1270242 | 1273970 | 195.8051802 | 208.403716 | 1.06434 |
| hypothetical protein                                                    | 1156 | 1273957 | 1274109 | 9.868421053 | 0          | 0       |
| Flagellar hook-length control protein fliK                              | 1155 | 1274168 | 1278517 | 104.966659  | 138.652564 | 1.32092 |
| Flagellar hook-length control protein fliK                              | 1154 | 1278519 | 1282337 | 94.2902043  | 111.380304 | 1.18125 |
| Adenylate cyclase (EC 4.6.1.1)                                          | 1153 | 1282349 | 1284232 | 79.39458311 | 84.8380244 | 1.06856 |
| hypothetical protein                                                    | 1152 | 1284229 | 1287156 | 94.97779296 | 104.543902 | 1.10072 |
| hypothetical protein                                                    | 1151 | 1287146 | 1288414 | 67.42902208 | 53.2334385 | 0.78947 |
| hypothetical protein                                                    | 1150 | 1288415 | 1289959 | 56.99481865 | 52.4611399 | 0.92045 |
| Cellulose synthase catalytic subunit [UDP-forming] (EC 2.4.1.12)        | 1149 | 1289975 | 1292434 | 52.25701505 | 71.3704758 | 1.36576 |
| hypothetical protein                                                    | 1148 | 1292431 | 1292628 | 65.98984772 | 11.4213198 | 0.17308 |
| Probable poly(beta-D-mannuronate) O-acetylase (EC 2.3.1.-)              | 1147 | 1292658 | 1294100 | 29.12621359 | 26.5256588 | 0.91071 |
| hypothetical protein                                                    |      | 1294111 | 1295427 | 64.96960486 | 58.1306991 | 0.89474 |
| hypothetical protein                                                    | 1145 | 1295424 | 1296770 | 77.63744428 | 76.8945022 | 0.99043 |
| hypothetical protein                                                    | 1144 | 1296788 | 1298293 | 32.55813953 | 34.3853821 | 1.05612 |
| Beta-glucanase precursor (EC 3.2.1.73)                                  | 1143 | 1298309 | 1299256 | 83.94931362 | 80.781415  | 0.96226 |
| Xanthan biosynthesis acetyltransferase GumF                             | 1142 | 1299253 | 1301559 | 17.99653079 | 14.6357329 | 0.81325 |
| Acyl-CoA thioesterase I                                                 | 1141 | 1301552 | 1302292 | 49.32432432 | 42.5675676 | 0.86301 |
| Beta-glucosidase (EC 3.2.1.21)                                          |      | 1302302 | 1303096 | 26.44836272 | 51.0075567 | 1.92857 |
| Beta-glucosidase (EC 3.2.1.21)                                          | 1139 | 1303050 | 1303955 | 44.19889503 | 42.2651934 | 0.95625 |
| hypothetical protein                                                    | 1138 | 1303994 | 1304119 | 20          | 54         | 2.7     |
| hypothetical protein                                                    | 1137 | 1304229 | 1304588 | 59.88857939 | 62.6740947 | 1.04651 |
| hypothetical protein                                                    | 1136 | 1304601 | 1306805 | 46.27949183 | 37.7722323 | 0.81618 |
| D amino acid oxidase (DAO) family (EC 1.4.3.3)                          | 1135 | 1306821 | 1307906 | 146.0829493 | 197.004608 | 1.34858 |
| hypothetical protein                                                    | 1134 | 1308083 | 1310962 | 64.08475165 | 85.1858284 | 1.32927 |
| 5'-nucleotidase (EC 3.1.3.5)                                            | 1133 | 1310968 | 1314312 | 85.37679426 | 97.562799  | 1.14273 |
| Outer membrane protein                                                  | 1132 | 1314350 | 1317397 | 65.14604529 | 73.1046931 | 1.12217 |
| Aminotransferase                                                        | 1130 | 1317470 | 1318582 | 402.8776978 | 459.307554 | 1.14007 |
| hypothetical protein                                                    | 1131 | 1318579 | 1318692 | 61.94690265 | 39.8230088 | 0.64286 |
| FOG: TPR repeat                                                         | 1129 | 1318676 | 1320202 | 101.2450852 | 85.5176933 | 0.84466 |
| type 4 fimbrial biogenesis protein PilY1                                | 1127 | 1320288 | 1323590 | 931.2537856 | 845.623864 | 0.90805 |
| hypothetical protein                                                    | 1128 | 1323574 | 1323696 | 209.0163934 | 73.7704918 | 0.35294 |
| Uncharacterized protein, related to enterotoxins of other Clostridiales | 1126 | 1323669 | 1328528 | 212.5951842 | 259.775674 | 1.22193 |

|                                                                           |      |         |         |             |            |         |
|---------------------------------------------------------------------------|------|---------|---------|-------------|------------|---------|
| Glycosyltransferase                                                       | 1125 | 1328568 | 1329512 | 18.53813559 | 14.3008475 | 0.77143 |
| hypothetical protein                                                      | 1124 | 1329545 | 1330528 | 11.69888098 | 4.57782299 | 0.3913  |
| hypothetical protein                                                      | 1123 | 1330551 | 1331528 | 25.58853634 | 6.90890481 | 0.27    |
| Polymyxin resistance protein ArnC, glycosyl transferase (EC 2.4.-.-)      | 1122 | 1331532 | 1332281 | 18.69158879 | 6.00801068 | 0.32143 |
| Putative sugar translocase in surface polysaccharides biosynthesis        | 1121 | 1332297 | 1332737 | 12.5        | 0          | 0       |
| Ser/Thr protein phosphatase family protein                                | 1120 | 1332747 | 1333586 | 16.09058403 | 0          | 0       |
| Cell surface protein IsdA, transfers heme from hemoglobin to apo-IsdC     | 1119 | 1333594 | 1335216 | 411.837238  | 151.202219 | 0.36714 |
| Aspartyl-tRNA synthetase (EC 6.1.1.12); Aspartyl-tRNA(Asn) synthetase     | 1118 | 1335400 | 1336740 | 170.1492537 | 152.798507 | 0.89803 |
| Putative sugar transporter                                                | 1117 | 1336737 | 1338146 | 55.35841022 | 27.1469127 | 0.49038 |
| Putative sugar transporter                                                | 1116 | 1338154 | 1339521 | 71.3240673  | 39.5025604 | 0.55385 |
| Hexokinase (EC 2.7.1.1)                                                   | 1115 | 1339580 | 1340932 | 205.2514793 | 231.323964 | 1.12703 |
| Fibronectin/fibrinogen-binding protein                                    | 1114 | 1340939 | 1342378 | 84.08617095 | 68.7977762 | 0.81818 |
| Beta-hexosaminidase (EC 3.2.1.52)                                         | 1113 | 1342432 | 1343688 | 64.49044586 | 41.2022293 | 0.63889 |
| Ribosomal large subunit pseudouridine synthase D (EC 4.2.1.70)            | 1112 | 1343685 | 1344332 | 184.698609  | 128.670788 | 0.69665 |
| MII4958 protein                                                           | 1111 | 1344363 | 1345616 | 203.1125299 | 143.655227 | 0.70727 |
| hypothetical protein                                                      | 1110 | 1345653 | 1346537 | 52.0361991  | 38.178733  | 0.7337  |
| Oxidoreductase, aldo/keto reductase family                                | 1109 | 1346635 | 1347555 | 229.8913043 | 100.271739 | 0.43617 |
| hypothetical protein                                                      | 1108 | 1347565 | 1348254 | 76.19738752 | 52.2496372 | 0.68571 |
| hypothetical protein                                                      | 1107 | 1348382 | 1348606 | 7.211538462 | 21.6346154 | 3       |
| hypothetical protein                                                      | 1106 | 1348965 | 1349573 | 289.4736842 | 510.690789 | 1.7642  |
| hypothetical protein                                                      | 1105 | 1349558 | 1349728 | 20.58823529 | 52.9411765 | 2.57143 |
| Predicted cell-wall-anchored protein SasA (LPXTG motif)                   | 1104 | 1349801 | 1351684 | 31.33297929 | 7.16941052 | 0.22881 |
| Permease of the major facilitator superfamily                             | 1103 | 1351690 | 1352976 | 74.65007776 | 68.2348367 | 0.91406 |
| Methyl parathion hydrolase                                                | 1102 | 1353012 | 1353869 | 102.1003501 | 57.7596266 | 0.56571 |
| FKBP-type peptidyl-prolyl cis-trans isomerase fkpA precursor (EC 5.2.1.8) | 1101 | 1353938 | 1354870 | 220.4935622 | 246.244635 | 1.11679 |
| Macrophage infectivity potentiator/GldI                                   | 1100 | 1354871 | 1355599 | 338.5989011 | 343.063187 | 1.01318 |
| Nucleoside diphosphate kinase (EC 2.7.4.6)                                | 1099 | 1355624 | 1356811 | 157.1187869 | 176.284751 | 1.12198 |
| Translation elongation factor G                                           | 1098 | 1356916 | 1358991 | 137.5903614 | 119.277108 | 0.8669  |
| Kynurenine formamidase, bacterial (EC 3.5.1.9)                            | 1097 | 1359007 | 1359735 | 91.34615385 | 132.898352 | 1.45489 |
| sensory box histidine kinase/response regulator                           | 1096 | 1359750 | 1363502 | 88.30612791 | 134.265454 | 1.52045 |
| Chromosome partitioning protein parB / Stage 0 sporulation protein J      | 1095 | 1363519 | 1363911 | 89.28571429 | 149.234694 | 1.67143 |
| Multimodular transpeptidase-transglycosylase (EC 2.4.1.129) (EC 3.4.-.-)  | 1094 | 1363922 | 1366594 | 170.4715569 | 217.252994 | 1.27442 |
| hypothetical protein                                                      | 1093 | 1366629 | 1366850 | 214.953271  | 10.5140187 | 0.04891 |
| hypothetical protein                                                      | 1092 | 1366825 | 1367805 | 175         | 183.673469 | 1.04956 |
| Membrane proteins related to metalloendopeptidases                        | 1091 | 1367830 | 1368780 | 124.7368421 | 111.315789 | 0.89241 |
| Ferredoxin                                                                | 1090 | 1368780 | 1368950 | 2461.764706 | 3877.94118 | 1.57527 |
| Fatty acid degradation regulator YsiA, TetR family                        | 1089 | 1368990 | 1369871 | 129.3984109 | 183.881952 | 1.42105 |
| hypothetical protein                                                      | 1088 | 1369861 | 1370130 | 63.19702602 | 66.9144981 | 1.05882 |
| MEMBRANE PROTEIN MOSC                                                     |      | 1370197 | 1371339 | 199.2119089 | 242.338004 | 1.21648 |

|                                                                                |      |         |         |             |            |         |
|--------------------------------------------------------------------------------|------|---------|---------|-------------|------------|---------|
| UDP-glucose 4-epimerase (EC 5.1.3.2)                                           | 1086 | 1371345 | 1372379 | 1234.042553 | 1214.21663 | 0.98393 |
| Integrase domain protein                                                       | 1085 | 1372512 | 1373747 | 49.39271255 | 9.10931174 | 0.18443 |
| hypothetical protein                                                           | 1084 | 1373789 | 1373905 | 38.79310345 | 19.3965517 | 0.5     |
| Aldo/keto reductase                                                            | 1083 | 1373900 | 1375081 | 119.8137172 | 85.7324301 | 0.71555 |
| Oxidoreductase (EC 1.1.1.-)                                                    | 1082 | 1375151 | 1376014 | 502.3174971 | 474.507532 | 0.94464 |
| hypothetical protein                                                           | 1080 | 1376021 | 1376719 | 145.4154728 | 93.4813754 | 0.64286 |
| hypothetical protein                                                           | 1081 | 1376684 | 1379353 | 25.29037093 | 5.05807419 | 0.2     |
| hypothetical protein                                                           | 1079 | 1379380 | 1380459 | 43.09545876 | 16.6821131 | 0.3871  |
| ACT domain containing transcriptional regulators,<br>related to gcvR of E.coli |      | 1380498 | 1383593 | 25.84814216 | 13.085622  | 0.50625 |
| Chaperone protein DnaK                                                         | 1077 | 1383595 | 1385766 | 48.36480884 | 37.3099954 | 0.77143 |
| Chaperone protein DnaK                                                         | 1076 | 1385770 | 1387413 | 109.2513694 | 87.6445526 | 0.80223 |
| GrpE protein HSP-70 cofactor                                                   | 1075 | 1387415 | 1388056 | 70.20280811 | 49.1419657 | 0.7     |
| hypothetical protein                                                           | 1074 | 1388076 | 1389677 | 37.78888195 | 32.3235478 | 0.85537 |
| Integrase                                                                      | 1073 | 1389974 | 1391389 | 18.28358209 | 3.35820896 | 0.18367 |
| hypothetical protein                                                           | 1072 | 1391523 | 1391798 | 34.22053232 | 0          | 0       |
| hypothetical protein                                                           | 1071 | 1391782 | 1392387 | 41.32231405 | 0          | 0       |
| Phage DNA Packaging Protein                                                    | 1070 | 1392390 | 1393613 | 27.63819095 | 0          | 0       |
| Portal protein                                                                 | 1069 | 1393610 | 1394866 | 14.95553759 | 0          | 0       |
| BarA-associated response regulator UvrY (= GacA = SirA)                        | 1068 | 1394856 | 1395578 | 24.33936022 | 3.12934631 | 0.12857 |
| hypothetical protein                                                           | 1067 | 1395559 | 1396233 | 28.18991098 | 0          | 0       |
| Major capsid protein, HK97 family                                              | 1066 | 1396238 | 1397545 | 35.87962963 | 3.47222222 | 0.09677 |
| hypothetical protein                                                           | 1065 | 1397666 | 1397806 | 14.28571429 | 0          | 0       |
| Bpl06                                                                          | 1064 | 1397867 | 1398289 | 17.1990172  | 5.52825553 | 0.32143 |
| conserved domain protein                                                       | 1063 | 1398339 | 1398845 | 8.893280632 | 0          | 0       |
| hypothetical protein                                                           | 1062 | 1398898 | 1399152 | 11.81102362 | 0          | 0       |
| hypothetical protein                                                           | 1061 | 1399210 | 1399509 | 21.73913043 | 0          | 0       |
| hypothetical protein                                                           | 1060 | 1399684 | 1399899 | 25.58139535 | 52.3255814 | 2.04545 |
| hypothetical protein                                                           | 1059 | 1400056 | 1400196 | 39.28571429 | 0          | 0       |
| Type III restriction-modification system<br>methylation subunit (EC 2.1.1.72)  | 1058 | 1400399 | 1402363 | 31.31364562 | 29.7861507 | 0.95122 |
| Type III restriction-modification system DNA<br>endonuclease res (EC 3.1.21.5) | 1057 | 1402360 | 1404930 | 17.89883268 | 7.87937743 | 0.44022 |
| hypothetical protein                                                           | 1055 | 1404933 | 1406984 | 5.607020965 | 0          | 0       |
| hypothetical protein                                                           | 1056 | 1406968 | 1407099 | 0           | 0          | #DIV/0! |
| hypothetical protein                                                           | 1054 | 1407065 | 1407235 | 14.70588235 | 0          | 0       |
| hypothetical protein                                                           | 1052 | 1407270 | 1407437 | 86.82634731 | 94.3113772 | 1.08621 |
| hypothetical protein                                                           | 1053 | 1407426 | 1408196 | 7.142857143 | 17.5324675 | 2.45455 |
| hypothetical protein                                                           | 1051 | 1408333 | 1408725 | 108.4183673 | 143.494898 | 1.32353 |
| probable transcription regulator NMA0738                                       | 1050 | 1408739 | 1409362 | 50.75593952 | 68.0345572 | 1.34043 |
| COG1801: Uncharacterized conserved protein                                     | 1049 | 1409475 | 1410308 | 93.63525092 | 201.040392 | 2.14706 |
| DNA polymerase IV (EC 2.7.7.7)                                                 | 1048 | 1410274 | 1411491 | 83.26359833 | 82.8451883 | 0.99497 |
| DNA polymerase III alpha subunit (EC 2.7.7.7)                                  | 1047 | 1411475 | 1414432 | 54.09202669 | 36.3540569 | 0.67208 |
| protein of unknown function DUF262                                             | 1046 | 1414539 | 1416665 | 11.05362183 | 2.11665099 | 0.19149 |
| hypothetical protein                                                           | 1045 | 1417109 | 1417711 | 27.77777778 | 0          | 0       |
| hypothetical protein                                                           | 1044 | 1417708 | 1418136 | 26.86915888 | 0          | 0       |
| hypothetical protein                                                           | 1043 | 1418133 | 1418996 | 40.32258065 | 2.79156328 | 0.06923 |
| hypothetical protein                                                           | 1042 | 1418993 | 1420513 | 20.77151335 | 3.33827893 | 0.16071 |
| hypothetical protein                                                           | 1041 | 1420562 | 1420786 | 17.85714286 | 0          | 0       |
| Putative lipoprotein                                                           | 1040 | 1420790 | 1421299 | 8.84086444  | 0          | 0       |
| hypothetical protein                                                           | 1039 | 1421311 | 1421571 | 27.90697674 | 0          | 0       |

|                                                                                       |      |         |         |             |            |         |
|---------------------------------------------------------------------------------------|------|---------|---------|-------------|------------|---------|
| hypothetical protein                                                                  | 1038 | 1421568 | 1421855 | 20.7253886  | 0          | 0       |
| hypothetical protein                                                                  | 1037 | 1421815 | 1422096 | 22.16748768 | 0          | 0       |
| hypothetical protein                                                                  | 1036 | 1422097 | 1422648 | 41.81184669 | 0          | 0       |
| hypothetical protein                                                                  | 1035 | 1422645 | 1424441 | 20.34482759 | 1.55172414 | 0.07627 |
| hypothetical protein                                                                  | 1034 | 1424464 | 1424754 | 40.28436019 | 0          | 0       |
| hypothetical protein                                                                  | 1033 | 1424941 | 1425294 | 18.41359773 | 0          | 0       |
| putative DNA primase/helicase                                                         | 1032 | 1425279 | 1426673 | 33.21167883 | 4.9270073  | 0.14835 |
| hypothetical protein                                                                  | 1031 | 1427691 | 1427828 | 14.59854015 | 0          | 0       |
| hypothetical protein                                                                  | 1030 | 1428039 | 1428173 | 74.62686567 | 16.7910448 | 0.225   |
| hypothetical protein                                                                  | 1029 | 1428896 | 1429291 | 184.8101266 | 136.708861 | 0.73973 |
| Putative cytoplasmic protein                                                          | 1028 | 1429263 | 1431290 | 74.49432659 | 66.600888  | 0.89404 |
| hypothetical protein                                                                  | 1026 | 1431472 | 1432566 | 66.72760512 | 71.9835466 | 1.07877 |
| 2,3-bisphosphoglycerate-independent phosphoglycerate mutase (EC 5.4.2.1)              | 1025 | 1432568 | 1434250 | 447.6190476 | 472.767857 | 1.05618 |
| L-fucose isomerase related protein                                                    | 1024 | 1434314 | 1435810 | 742.9812834 | 795.621658 | 1.07085 |
| Menaquinone biosynthesis related protein, putative DHNA-CoA thioesterase              | 1023 | 1435863 | 1436747 | 102.3755656 | 78.9027149 | 0.77072 |
| Carbamoyl-phosphate synthase large chain (EC 6.3.5.5)                                 |      | 1436748 | 1440104 | 235.998802  | 258.760108 | 1.09645 |
| Carbamoyl-phosphate synthase small chain (EC 6.3.5.5)                                 |      | 1440114 | 1441280 | 273.5682819 | 295.374449 | 1.07971 |
| Methyl-accepting chemotaxis protein                                                   | 1020 | 1441519 | 1442010 | 122.1995927 | 160.386965 | 1.3125  |
| hypothetical protein                                                                  | 1019 | 1442323 | 1442454 | 83.96946565 | 68.7022901 | 0.81818 |
| Glucokinase (EC 2.7.1.2)                                                              | 1018 | 1442540 | 1443436 | 156.25      | 148.158482 | 0.94821 |
| ADP-heptose synthase (EC 2.7.-.-) / D-glycero-beta-D-manno-heptose 7-phosphate kinase | 1017 | 1443484 | 1444584 | 192.2727273 | 192.272727 | 1       |
| Phosphoheptose isomerase (EC 5.-.-)                                                   | 1016 | 1444594 | 1445172 | 160.899654  | 194.636678 | 1.20968 |
| hypothetical protein                                                                  | 1015 | 1445182 | 1446159 | 193.4493347 | 285.568066 | 1.47619 |
| Haloacid dehalogenase domain protein hydrolase                                        | 1014 | 1446149 | 1446982 | 257.5030012 | 326.830732 | 1.26923 |
| Ribose ABC transporter, periplasmic ribose-binding protein rbsB (TC 3.A.1.2.1)        | 1013 | 1447079 | 1448095 | 1707.677165 | 2263.2874  | 1.32536 |
| Ribose ABC transport system, ATP-binding protein RbsA (TC 3.A.1.2.1)                  | 1012 | 1448201 | 1449700 | 270.8472315 | 375.250167 | 1.38547 |
| Ribose ABC transport system, permease protein RbsC (TC 3.A.1.2.1)                     | 1011 | 1449697 | 1450668 | 154.9948507 | 143.666323 | 0.92691 |
| NADH-dependent dehydrogenase                                                          | 1010 | 1450673 | 1451761 | 125.4595588 | 163.373162 | 1.3022  |
| Isocitrate dehydrogenase [NADP] (EC 1.1.1.42)                                         | 1009 | 1451783 | 1452991 | 173.3001658 | 223.880597 | 1.29187 |
| hypothetical protein                                                                  | 1008 | 1453041 | 1453355 | 57.32484076 | 28.6624204 | 0.5     |
| hypothetical protein                                                                  | 1007 | 1453348 | 1453944 | 55.36912752 | 56.6275168 | 1.02273 |
| hypothetical protein                                                                  | 1006 | 1454013 | 1454828 | 82.20858896 | 99.3865031 | 1.20896 |
| Chromosome 14 contig 1, DNA sequence                                                  | 1004 | 1454825 | 1456507 | 41.91438763 | 18.7277051 | 0.44681 |
| Hydroxyacylglutathione hydrolase (EC 3.1.2.6)                                         | 1005 | 1456504 | 1457121 | 160.4538088 | 138.573744 | 0.86364 |
| Pentapeptide repeat family protein                                                    | 1003 | 1457118 | 1457711 | 55.64924115 | 30.3541315 | 0.54545 |
| hypothetical protein                                                                  | 1002 | 1457775 | 1458071 | 59.12162162 | 83.6148649 | 1.41429 |
| Ribosome small subunit-stimulated GTPase EngC                                         | 1001 | 1458087 | 1459004 | 56.16139586 | 51.5267176 | 0.91748 |
| Recombination inhibitory protein MutS2                                                | 1000 | 1459011 | 1461416 | 41.58004158 | 35.5509356 | 0.855   |
| Alpha-galactosidase (EC 3.2.1.22)                                                     | 999  | 1461425 | 1462849 | 29.84550562 | 37.9213483 | 1.27059 |
| Lactoylglutathione lyase and related lyases                                           | 998  | 1462874 | 1463335 | 54.22993492 | 43.9262473 | 0.81    |
| Ribose operon repressor                                                               | 997  | 1463363 | 1464445 | 61.92236599 | 31.1922366 | 0.50373 |



|                                                                                                |     |         |         |             |            |         |
|------------------------------------------------------------------------------------------------|-----|---------|---------|-------------|------------|---------|
| L-xylulose 5-phosphate 3-epimerase (EC 5.1.3.-)                                                | 996 | 1464455 | 1465336 | 48.80817253 | 33.2009081 | 0.68023 |
| Putative carbohydrate kinase, FGGY family                                                      | 995 | 1465339 | 1466850 | 97.94837856 | 53.6068829 | 0.5473  |
| hypothetical protein                                                                           | 994 | 1466860 | 1468077 | 26.29416598 | 7.39523418 | 0.28125 |
| alpha-arabinosides ABC transport system, substrate-binding protein araN                        | 993 | 1468358 | 1469689 | 17.28024042 | 10.1427498 | 0.58696 |
| Sugar ABC transporter permease                                                                 | 992 | 1469775 | 1470671 | 8.928571429 | 2.51116071 | 0.28125 |
| N-Acetyl-D-glucosamine ABC transport system, permease protein 2                                | 991 | 1470770 | 1471540 | 10.38961039 | 0          | 0       |
| Dehydrogenase                                                                                  | 990 | 1471597 | 1472739 | 11.82136602 | 1.97022767 | 0.16667 |
| Sugar phosphate isomerases/epimerases                                                          | 989 | 1472770 | 1473558 | 12.05583756 | 0          | 0       |
| Sugar phosphate isomerases/epimerases oxidoreductase of aldo/keto reductase family, subgroup 1 | 988 | 1473581 | 1474396 | 17.17791411 | 0          | 0       |
| hypothetical protein                                                                           | 987 | 1474447 | 1475313 | 20.7852194  | 20.7852194 | 1       |
| hypothetical protein                                                                           | 986 | 1475654 | 1477795 | 12.37739374 | 7.35637553 | 0.59434 |
| hypothetical protein                                                                           | 985 | 1477813 | 1479027 | 14.82701812 | 7.41350906 | 0.5     |
| Alpha-L-fucosidase (EC 3.2.1.51)                                                               | 984 | 1479045 | 1481174 | 11.27289807 | 4.22733678 | 0.375   |
| N-Acetyl-D-glucosamine ABC transport system, permease protein 2                                | 983 | 1481208 | 1482032 | 11.52912621 | 0          | 0       |
| N-Acetyl-D-glucosamine ABC transport system, permease protein 1                                | 982 | 1482032 | 1482904 | 16.05504587 | 0          | 0       |
| N-Acetyl-D-glucosamine ABC transport system, sugar-binding protein                             | 981 | 1482972 | 1484228 | 17.11783439 | 3.58280255 | 0.2093  |
| Transcriptional (co)regulator CytR                                                             | 980 | 1484451 | 1485488 | 40.50144648 | 26.0366442 | 0.64286 |
| TM2 domain protein                                                                             | 979 | 1485568 | 1486086 | 230.3149606 | 225.885827 | 0.98077 |
| hypothetical protein                                                                           | 978 | 1486119 | 1487501 | 149.4211288 | 73.2633864 | 0.49031 |
| hypothetical protein                                                                           | 977 | 1487534 | 1487647 | 0           | 0          | #DIV/0! |
| Arginine pathway regulatory protein ArgR, repressor of arg regulon                             | 976 | 1487629 | 1488102 | 84.56659619 | 57.0824524 | 0.675   |
| Glucose-6-phosphate isomerase (EC 5.3.1.9)                                                     | 975 | 1488229 | 1489818 | 156.2696912 | 188.563327 | 1.20665 |
| hypothetical protein                                                                           | 974 | 1489828 | 1490388 | 80.35714286 | 80.3571429 | 1       |
| Predicted beta-xyloside ABC transporter, substrate-binding component                           | 973 | 1490454 | 1491803 | 679.6116505 | 858.663181 | 1.26346 |
| Multiple sugar ABC transporter, membrane-spanning permease protein MsmF                        | 972 | 1491869 | 1492774 | 27.62430939 | 12.4309392 | 0.45    |
| Multiple sugar ABC transporter, membrane-spanning permease protein MsmG                        | 971 | 1492778 | 1493620 | 40.38004751 | 24.0498812 | 0.59559 |
| hypothetical protein                                                                           | 970 | 1493643 | 1494536 | 55.43113102 | 42.8331467 | 0.77273 |
| Transcriptional regulator                                                                      | 969 | 1494533 | 1495474 | 36.7803838  | 57.5692964 | 1.56522 |
| hypothetical protein                                                                           | 968 | 1495467 | 1496135 | 51.64670659 | 63.997006  | 1.23913 |
| TPR domain protein, putative component of TonB system                                          | 967 | 1496132 | 1497130 | 100.2004008 | 114.97996  | 1.1475  |
| Adenylate cyclase (EC 4.6.1.1)                                                                 | 966 | 1497210 | 1497926 | 159.2178771 | 254.539106 | 1.59868 |
| TPR domain protein                                                                             | 965 | 1497961 | 1499964 | 185.7214179 | 268.472292 | 1.44556 |
| ACT domain protein                                                                             | 964 | 1499991 | 1500260 | 128.2527881 | 234.200743 | 1.82609 |
| Glycerol-3-phosphate dehydrogenase (NAD(P)+) (EC 1.1.1.94)                                     | 963 | 1500264 | 1501625 | 224.112426  | 444.341716 | 1.98267 |
| Oligopeptide transport ATP-binding protein oppF (TC 3.A.1.5.1)                                 |     | 1501635 | 1502381 | 78.41823056 | 81.4343164 | 1.03846 |
| Oligopeptide transport ATP-binding protein oppD (TC 3.A.1.5.1)                                 | 961 | 1502365 | 1503336 | 72.60556128 | 41.7095778 | 0.57447 |

|                                                                                                  |     |         |         |             |            |         |
|--------------------------------------------------------------------------------------------------|-----|---------|---------|-------------|------------|---------|
| Dipeptide transport system permease protein dppC (TC 3.A.1.5.2)                                  | 960 | 1503338 | 1504138 | 61.25       | 45         | 0.73469 |
| Dipeptide transport system permease protein dppB (TC 3.A.1.5.2)                                  | 959 | 1504135 | 1505100 | 67.87564767 | 58.2901554 | 0.85878 |
| Dipeptide-binding ABC transporter, periplasmic substrate-binding component (TC 3.A.1.5.2)        | 958 | 1505104 | 1506651 | 121.5255333 | 120.717518 | 0.99335 |
| Hybrid sensory kinase                                                                            | 957 | 1506907 | 1507257 | 502.8571429 | 565.714286 | 1.125   |
| Metal dependent phosphohydrolase                                                                 |     | 1507247 | 1507954 | 625         | 830.818966 | 1.32931 |
| Response regulator receiver modulated metal dependent phosphohydrolase                           |     | 1507951 | 1508307 | 623.5955056 | 821.629213 | 1.31757 |
| Intergenic (highly expressed)                                                                    |     | 1508370 | 1508650 | 127801.7857 | 164515.179 | 1.28727 |
| Uncharacterized protein TP_0813                                                                  | 954 | 1508765 | 1509715 | 90          | 82.8947368 | 0.92105 |
| hypothetical protein                                                                             | 952 | 1509787 | 1510035 | 54.43548387 | 90.7258065 | 1.66667 |
| Methyl-accepting chemotaxis protein                                                              | 953 | 1510025 | 1511434 | 65.29453513 | 35.1312988 | 0.53804 |
| Deoxycytidylate deaminase                                                                        | 951 | 1511406 | 1511948 | 96.86346863 | 66.4206642 | 0.68571 |
| Tagatose-6-phosphate kinase (EC 2.7.1.144) / 1-phosphofructokinase (EC 2.7.1.56)                 | 949 | 1511985 | 1512911 | 84.23326134 | 51.0259179 | 0.60577 |
| Adenylate cyclase (EC 4.6.1.1)                                                                   | 950 | 1512889 | 1513467 | 48.44290657 | 31.1418685 | 0.64286 |
| hypothetical protein                                                                             | 948 | 1513534 | 1513710 | 42.61363636 | 25.5681818 | 0.6     |
| Lipoprotein nlpD                                                                                 | 947 | 1513687 | 1514475 | 246.8274112 | 314.086294 | 1.27249 |
| RNA polymerase sigma factor RpoD                                                                 | 946 | 1514527 | 1515528 | 42.88597376 | 45.4086781 | 1.05882 |
| ABC transporter, ATP-binding protein                                                             | 945 | 1515538 | 1516515 | 59.87717503 | 16.1207779 | 0.26923 |
| putative integral membrane protein                                                               | 944 | 1516512 | 1517345 | 36.01440576 | 10.8043217 | 0.3     |
| ABC transporter permease protein                                                                 | 943 | 1517346 | 1518125 | 43.00385109 | 37.5481386 | 0.87313 |
| TRAP-type C4-dicarboxylate transport system, large permease component                            | 942 | 1518140 | 1520023 | 83.64312268 | 93.2023367 | 1.11429 |
| TRAP-type transport system, periplasmic component, predicted N-acetylneuraminase-binding protein | 941 | 1520027 | 1521067 | 351.4423077 | 437.019231 | 1.2435  |
| hypothetical protein                                                                             | 940 | 1521078 | 1522043 | 308.2901554 | 359.067358 | 1.16471 |
| DNA polymerase III alpha subunit (EC 2.7.7.7)                                                    | 939 | 1522135 | 1522698 | 103.9076377 | 87.9218472 | 0.84615 |
| Phosphoglucomutase (EC 5.4.2.2)                                                                  | 938 | 1522698 | 1524446 | 186.4553314 | 149.135447 | 0.79985 |
| hypothetical protein                                                                             | 937 | 1524587 | 1524841 | 598.4251969 | 504.92126  | 0.84375 |
| Oxaloacetate decarboxylase alpha chain (EC 4.1.1.3)                                              | 936 | 1524902 | 1526947 | 714.1809291 | 1109.04645 | 1.55289 |
| Oxaloacetate decarboxylase beta chain (EC 4.1.1.3)                                               | 935 | 1526957 | 1528363 | 612.5356125 | 862.179487 | 1.40756 |
| Sensory box histidine kinase/response regulator                                                  | 934 | 1528457 | 1531090 | 106.5324725 | 95.7083175 | 0.8984  |
| Response regulator containing a CheY-like receiver domain and a GGDEF domain                     | 933 | 1531104 | 1532009 | 220.9944751 | 228.729282 | 1.035   |
| hypothetical protein                                                                             | 932 | 1532002 | 1533303 | 62.64411991 | 58.8009224 | 0.93865 |
| Lipoate synthase                                                                                 | 931 | 1533316 | 1534164 | 53.06603774 | 31.8396226 | 0.6     |
| lipoate-protein ligase A                                                                         |     | 1534154 | 1534468 | 23.88535032 | 7.1656051  | 0.3     |
| Lipoate-protein ligase A                                                                         | 929 | 1534461 | 1535240 | 39.15275995 | 5.77663671 | 0.14754 |
| hypothetical protein                                                                             | 928 | 1535282 | 1536265 | 216.6836216 | 222.024415 | 1.02465 |
| hypothetical protein                                                                             | 927 | 1536262 | 1536531 | 152.4163569 | 259.29368  | 1.70122 |
| Foldase protein prsA precursor (EC 5.2.1.8)                                                      | 926 | 1536533 | 1536811 | 408.2733813 | 428.956835 | 1.05066 |
| GAF domain/HD domain protein                                                                     | 925 | 1536864 | 1538120 | 378.9808917 | 438.893312 | 1.15809 |
| UPF0178 protein TDE_2151                                                                         | 924 | 1538133 | 1538603 | 129.787234  | 172.340426 | 1.32787 |
| Mannose-6-phosphate isomerase (EC 5.3.1.8)                                                       | 923 | 1538603 | 1540255 | 131.6585956 | 168.886199 | 1.28276 |
| Surface protein pspA precursor                                                                   | 922 | 1540260 | 1540772 | 674.8046875 | 773.4375   | 1.14616 |

|                                                                                                    |     |         |         |             |            |         |
|----------------------------------------------------------------------------------------------------|-----|---------|---------|-------------|------------|---------|
| LSU ribosomal protein L20p                                                                         | 921 | 1540774 | 1541133 | 1005.633803 | 1635.21127 | 1.62605 |
| LSU ribosomal protein L35p                                                                         | 920 | 1541152 | 1541352 | 1104.166667 | 1746.09375 | 1.58137 |
| Translation initiation factor 3                                                                    | 919 | 1541371 | 1541907 | 384.3283582 | 575.093284 | 1.49636 |
| hypothetical protein                                                                               | 917 | 1542070 | 1542684 | 128.6644951 | 98.9413681 | 0.76899 |
| PTS system, cellobiose-specific IIC component (EC 2.7.1.69)                                        | 918 | 1542641 | 1545586 | 96.0950764  | 92.4448217 | 0.96201 |
| Fructose-bisphosphate aldolase class II (EC 4.1.2.13)                                              | 916 | 1545740 | 1546738 | 1922.690763 | 2417.16867 | 1.25718 |
| hypothetical protein                                                                               | 915 | 1546790 | 1547737 | 47.51847941 | 45.1425554 | 0.95    |
| flagellar filament outer layer protein FlaA, putative                                              | 914 | 1547869 | 1548696 | 1096.130593 | 1382.10399 | 1.26089 |
| Flagellar filament outer layer protein                                                             | 913 | 1548708 | 1549433 | 584.137931  | 822.413793 | 1.40791 |
| T. pallidum predicted coding region TP0665                                                         | 912 | 1549479 | 1550144 | 81.95488722 | 54.1353383 | 0.66055 |
| Uncharacterized protein TP_0666                                                                    | 911 | 1550179 | 1550424 | 287.755102  | 247.959184 | 0.8617  |
| Cell division protein mraZ                                                                         | 910 | 1550643 | 1551095 | 282.079646  | 532.632743 | 1.88824 |
| S-adenosyl-methyltransferase mraW (EC 2.1.1.-)                                                     | 909 | 1551115 | 1552059 | 164.1949153 | 202.595339 | 1.23387 |
| cell division protein FtsL, putative                                                               | 908 | 1552063 | 1552338 | 274.5454545 | 556.363636 | 2.02649 |
| UDP-N-acetylmuramoylalanyl-D-glutamyl-2,6-diaminopimelate--D-alanyl-D- alanyl ligase (EC 6.3.2.10) | 907 | 1552351 | 1553784 | 150.3838102 | 219.818562 | 1.46172 |
| Phospho-N-acetylmuramoyl-pentapeptide-transferase (EC 2.7.8.13)                                    | 906 | 1553774 | 1554847 | 43.33643989 | 48.2292637 | 1.1129  |
| Cell division protein ftsW                                                                         | 905 | 1554858 | 1556015 | 75.62662057 | 87.5108038 | 1.15714 |
| Cell division protein ftsQ                                                                         | 904 | 1556017 | 1556835 | 56.84596577 | 123.777506 | 2.17742 |
| Cell division protein ftsA                                                                         | 903 | 1556843 | 1558081 | 94.10339257 | 94.5072698 | 1.00429 |
| Cell division protein ftsZ (EC 3.4.24.-)                                                           | 902 | 1558057 | 1559337 | 255.078125  | 402.539063 | 1.5781  |
| Site-specific recombinase XerD                                                                     | 901 | 1559345 | 1560277 | 144.8497854 | 229.345494 | 1.58333 |
| TPR domain protein                                                                                 |     | 1560267 | 1561013 | 103.8873995 | 126.675603 | 1.21935 |
| Rossmann fold nucleotide-binding protein Smf possibly involved in DNA uptake                       | 899 | 1561006 | 1561959 | 126.4428122 | 172.350472 | 1.36307 |
| DNA topoisomerase I (EC 5.99.1.2)                                                                  | 898 | 1561995 | 1564121 | 124.2937853 | 176.90678  | 1.4233  |
| Site-specific tyrosine recombinase                                                                 | 897 | 1564118 | 1565026 | 155.8370044 | 240.363436 | 1.5424  |
| ATP-dependent protease hslV (EC 3.4.25.-)                                                          | 896 | 1565023 | 1565574 | 192.3774955 | 289.927405 | 1.50708 |
| ATP-dependent hsl protease ATP-binding subunit hslU                                                | 895 | 1565584 | 1567149 | 199.4851995 | 305.501931 | 1.53145 |
| Flagellar basal-body rod protein flgB                                                              | 894 | 1567199 | 1567621 | 387.4407583 | 330.56872  | 0.85321 |
| Flagellar basal-body rod protein flgC                                                              | 893 | 1567628 | 1568089 | 327.5488069 | 351.409978 | 1.07285 |
| Flagellar hook-basal body complex protein fliE                                                     | 892 | 1568194 | 1568502 | 152.5974026 | 336.038961 | 2.20213 |
| Flagellar M-ring protein fliF                                                                      | 891 | 1568513 | 1570240 | 156.7944251 | 207.752613 | 1.325   |
| Flagellar motor switch protein fliG                                                                | 890 | 1570244 | 1571305 | 218.66164   | 330.819981 | 1.51293 |
| Flagellar assembly protein fliH                                                                    | 889 | 1571316 | 1572275 | 130.8654849 | 152.502607 | 1.16534 |
| Flagellum-specific ATP synthase fliI                                                               | 888 | 1572279 | 1573739 | 105.8219178 | 134.075342 | 1.26699 |
| Flagellar protein fliJ                                                                             | 887 | 1573736 | 1574179 | 51.91873589 | 66.027088  | 1.27174 |
| Uridine kinase (EC 2.7.1.48)                                                                       | 886 | 1574243 | 1575913 | 93.41317365 | 74.1017964 | 0.79327 |
| Nicotinate phosphoribosyltransferase (EC 2.4.2.11)                                                 | 885 | 1575937 | 1577385 | 72.51381215 | 43.5082873 | 0.6     |
| Nicotinamidase (EC 3.5.1.19)                                                                       | 884 | 1577382 | 1578029 | 69.55177743 | 66.0741886 | 0.95    |
| Response regulator                                                                                 | 883 | 1578143 | 1579243 | 56.36363636 | 14.3181818 | 0.25403 |
| sensory box histidine kinase/response regulator                                                    | 882 | 1579255 | 1582062 | 42.57214108 | 8.81724261 | 0.20711 |

|                                                                                                                                                                                   |     |         |         |             |            |         |
|-----------------------------------------------------------------------------------------------------------------------------------------------------------------------------------|-----|---------|---------|-------------|------------|---------|
| Transcriptional activator of maltose regulon, Malt Response regulator                                                                                                             | 881 | 1582185 | 1584728 | 17.89225324 | 19.4651986 | 1.08791 |
|                                                                                                                                                                                   | 880 | 1584730 | 1585833 | 42.15775159 | 63.2366274 | 1.5     |
| Sensory box histidine kinase/response regulator                                                                                                                                   | 879 | 1585837 | 1588686 | 53.91640323 | 50.5795574 | 0.93811 |
| hypothetical protein                                                                                                                                                              | 877 | 1589461 | 1589574 | 8.849557522 | 0          | 0       |
| hypothetical protein                                                                                                                                                              | 876 | 1589571 | 1589714 | 6.993006993 | 0          | 0       |
| hypothetical protein                                                                                                                                                              | 875 | 1589945 | 1590256 | 382.6366559 | 289.389068 | 0.7563  |
| Transposase and inactivated derivatives                                                                                                                                           | 874 | 1590268 | 1591221 | 133.7880378 | 73.1899265 | 0.54706 |
| hypothetical protein                                                                                                                                                              | 873 | 1591232 | 1591357 | 20          | 0          | 0       |
| hypothetical protein                                                                                                                                                              | 872 | 1591488 | 1591760 | 12.86764706 | 8.27205882 | 0.64286 |
| Putative arylsulfatase regulatory protein                                                                                                                                         | 871 | 1591969 | 1593108 | 32.48463565 | 27.6558385 | 0.85135 |
| Microsomal dipeptidase (EC 3.4.13.19)                                                                                                                                             | 870 | 1593121 | 1594083 | 33.26403326 | 18.7110187 | 0.5625  |
| Neuraminidase NanP                                                                                                                                                                | 869 | 1594078 | 1595892 | 63.67144432 | 23.5667034 | 0.37013 |
| Outer membrane protein tpn50 precursor (Antigen tpp57)                                                                                                                            | 868 | 1595900 | 1597099 | 41.28440367 | 33.7781485 | 0.81818 |
| Ribose-phosphate pyrophosphokinase (EC 2.7.6.1)                                                                                                                                   | 867 | 1597182 | 1598360 | 148.1324278 | 221.561969 | 1.4957  |
| Phosphoglycolate phosphatase (EC 3.1.3.18)                                                                                                                                        | 866 | 1598380 | 1599036 | 62.5        | 72.027439  | 1.15244 |
| Transcription regulator [contains diacylglycerol kinase catalytic domain]                                                                                                         | 864 | 1599033 | 1600154 | 55.75379126 | 44.1570027 | 0.792   |
| MgtC family protein                                                                                                                                                               | 865 | 1600151 | 1600837 | 80.90379009 | 85.2769679 | 1.05405 |
| hypothetical protein                                                                                                                                                              | 862 | 1601223 | 1601369 | 89.04109589 | 77.0547945 | 0.86538 |
| Uncharacterized protein TP_0851                                                                                                                                                   | 863 | 1601349 | 1603604 | 64.07982262 | 49.8891353 | 0.77855 |
| Putative enzyme                                                                                                                                                                   | 861 | 1603680 | 1606010 | 106.0085837 | 111.051502 | 1.04757 |
| Trp Operon Repressor                                                                                                                                                              | 860 | 1606023 | 1606325 | 155.6291391 | 260.761589 | 1.67553 |
| Phosphoglycolate phosphatase (EC 3.1.3.18)                                                                                                                                        | 859 | 1606327 | 1606977 | 96.15384615 | 65.7692308 | 0.684   |
| Na <sup>+</sup> -driven multidrug efflux pump                                                                                                                                     | 857 | 1607030 | 1608397 | 25.60351134 | 24.6891002 | 0.96429 |
| Methyltransferase/methylase                                                                                                                                                       | 858 | 1608394 | 1609248 | 44.49648712 | 39.5199063 | 0.88816 |
| Uncharacterized protein TP_0781                                                                                                                                                   | 856 | 1609249 | 1610133 | 59.95475113 | 76.3574661 | 1.27358 |
| Uncharacterized protein TP_0783                                                                                                                                                   | 855 | 1610135 | 1611220 | 192.1658986 | 197.004608 | 1.02518 |
| Cytidine deaminase (EC 3.5.4.5)                                                                                                                                                   | 854 | 1611254 | 1611664 | 46.34146341 | 43.902439  | 0.94737 |
| PTS system, fructose-specific IIA component (EC 2.7.1.69) / PTS system, fructose-specific IIB component (EC 2.7.1.69) / PTS system, fructose-specific IIC component (EC 2.7.1.69) | 853 | 1611719 | 1612372 | 227.4119449 | 182.618683 | 0.80303 |
| hypothetical protein                                                                                                                                                              | 852 | 1612386 | 1613618 | 59.65909091 | 54.788961  | 0.91837 |
| hypothetical protein                                                                                                                                                              | 851 | 1613655 | 1613825 | 67.64705882 | 66.1764706 | 0.97826 |
| Ribosomal large subunit pseudouridine synthase C (EC 4.2.1.70)                                                                                                                    | 850 | 1613851 | 1614516 | 107.518797  | 91.3533835 | 0.84965 |
| Uncharacterized protein TP_0359                                                                                                                                                   | 849 | 1614519 | 1615202 | 101.7569546 | 128.477306 | 1.26259 |
| Glycogen branching enzyme, archaeal type (EC 2.4.1.18)                                                                                                                            | 848 | 1615204 | 1616766 | 128.0409731 | 194.462228 | 1.51875 |
| UPF0164 protein TP_0859/TP_0860 precursor                                                                                                                                         | 847 | 1616768 | 1618066 | 102.0801233 | 64.1371341 | 0.6283  |
| Uncharacterized protein TP_0855 precursor                                                                                                                                         | 846 | 1618191 | 1621256 | 96.9004894  | 93.9641109 | 0.9697  |
| Serine phosphatase RsbU, regulator of sigma subunit                                                                                                                               | 845 | 1621253 | 1625881 | 78.26369344 | 72.0935267 | 0.92116 |
| hypothetical protein                                                                                                                                                              | 844 | 1625892 | 1626212 | 121.875     | 105.46875  | 0.86538 |
| hypothetical protein                                                                                                                                                              | 843 | 1626226 | 1627956 | 70.80924855 | 74.132948  | 1.04694 |
| PIN domain protein                                                                                                                                                                | 842 | 1627962 | 1628219 | 24.89626556 | 9.33609959 | 0.375   |
| hypothetical protein                                                                                                                                                              | 841 | 1628296 | 1628439 | 27.97202797 | 0          | 0       |
| unique zas9 16S rRNA 6                                                                                                                                                            |     | 1628953 | 1628963 | 477850      | 460575     | 0.96385 |

|                                                                                                                |     |         |         |             |            |         |
|----------------------------------------------------------------------------------------------------------------|-----|---------|---------|-------------|------------|---------|
| unique zas9 16S rRNA 3                                                                                         |     | 1629371 | 1629381 | 3083500     | 5220000    | 1.69288 |
| unique zas9 23S rRNA 8                                                                                         | 838 | 1630786 | 1630796 | 182950      | 263475     | 1.44015 |
| Transcriptional regulator of rhamnose utilization, AraC family                                                 | 834 | 1633944 | 1634816 | 39.56422018 | 56.766055  | 1.43478 |
| Ribose ABC transport system, periplasmic ribose-binding protein RbsB (TC 3.A.1.2.1)                            | 833 | 1634947 | 1635891 | 27.54237288 | 47.6694915 | 1.73077 |
| Ribose ABC transport system, ATP-binding protein RbsA (TC 3.A.1.2.1)                                           | 832 | 1635982 | 1637472 | 31.54362416 | 28.6912752 | 0.90957 |
| Ribose ABC transport system, permease protein RbsC (TC 3.A.1.2.1)                                              | 831 | 1637484 | 1638482 | 33.56713427 | 31.5631263 | 0.9403  |
| Trimethylamine corrinoid protein 2                                                                             | 830 | 1638479 | 1639585 | 40.68716094 | 6.10307414 | 0.15    |
| Oxalate/formate antiporter                                                                                     | 829 | 1639720 | 1640928 | 94.78476821 | 100.57947  | 1.06114 |
| Acetylornithine deacetylase (EC 3.5.1.16)                                                                      | 828 | 1640937 | 1642079 | 87.56567426 | 55.1663748 | 0.63    |
| Positive regulator of CheA protein activity (CheW)                                                             | 827 | 1642193 | 1642663 | 255.3191489 | 186.702128 | 0.73125 |
| 4-keto-6-deoxy-N-Acetyl-D-hexosaminy-(Lipid carrier) aminotransferase                                          | 826 | 1642695 | 1643726 | 250.7274491 | 226.964113 | 0.90522 |
| NAD kinase (EC 2.7.1.23)                                                                                       | 825 | 1643734 | 1644585 | 81.08108108 | 79.3184489 | 0.97826 |
| DNA repair protein RecN                                                                                        | 824 | 1644589 | 1646337 | 159.0389016 | 148.026316 | 0.93076 |
| hypothetical protein                                                                                           | 823 | 1646339 | 1647151 | 105.2955665 | 105.295567 | 1       |
| Ankyrin repeat protein                                                                                         | 822 | 1647206 | 1650061 | 237.3029772 | 168.651489 | 0.7107  |
| N-Acetyl-D-glucosamine ABC transport system, sugar-binding protein                                             | 820 | 1650182 | 1651585 | 161.6702355 | 158.993576 | 0.98344 |
| sensory box histidine kinase/response regulator                                                                | 819 | 1651582 | 1654530 | 71.91316147 | 82.4287653 | 1.14623 |
| spore peptidoglycan hydrolase (N-acetylglucosaminidase)                                                        | 818 | 1654532 | 1655596 | 137.2180451 | 173.402256 | 1.2637  |
| Transcriptional regulator, TetR family                                                                         | 817 | 1655741 | 1656442 | 75.60627675 | 99.5007133 | 1.31604 |
| membrane protein, putative                                                                                     | 816 | 1656429 | 1659101 | 51.08532934 | 44.629491  | 0.87363 |
| Outer membrane lipoprotein-sorting protein                                                                     | 815 | 1659098 | 1659880 | 70.33248082 | 86.3171355 | 1.22727 |
| hypothetical protein                                                                                           | 814 | 1659877 | 1661406 | 49.70568999 | 54.4473512 | 1.09539 |
| hypothetical protein                                                                                           | 813 | 1661588 | 1661716 | 0           | 0          | #DIV/0! |
| hypothetical protein                                                                                           | 812 | 1661762 | 1662304 | 0           | 0          | #DIV/0! |
| Nicotinamide-nucleotide adenyltransferase, NadR family (EC 2.7.7.1) / Ribosylnicotinamide kinase (EC 2.7.1.22) |     | 1662636 | 1663007 | 59.29919137 | 6.06469003 | 0.10227 |
| hypothetical protein                                                                                           | 810 | 1663195 | 1663731 | 48.50746269 | 12.5932836 | 0.25962 |
| UNC-44 ankyrins                                                                                                | 809 | 1663728 | 1664720 | 54.43548387 | 31.7540323 | 0.58333 |
| Ankyrin repeat proteins                                                                                        | 808 | 1664733 | 1666433 | 108.5294118 | 71.4705882 | 0.65854 |
| Molybdate metabolism regulator                                                                                 | 807 | 1666430 | 1668031 | 160.8369769 | 88.5384135 | 0.55049 |
| molybdate metabolism regulator                                                                                 |     | 1668274 | 1670439 | 103.0023095 | 80.0230947 | 0.77691 |
| hypothetical protein                                                                                           | 805 | 1671033 | 1671728 | 37.41007194 | 16.1870504 | 0.43269 |
| hypothetical protein                                                                                           | 804 | 1671737 | 1672339 | 35.71428571 | 11.2126246 | 0.31395 |
| hypothetical protein                                                                                           | 803 | 1672408 | 1673508 | 36.36363636 | 18.4090909 | 0.50625 |
| hypothetical protein                                                                                           | 802 | 1673535 | 1674368 | 48.01920768 | 21.6086435 | 0.45    |
| HD_GYP hydrolase domain fused to HD hydrolase domain                                                           | 800 | 1674436 | 1675695 | 35.34551231 | 33.9555203 | 0.96067 |
| hypothetical protein                                                                                           | 801 | 1675667 | 1677421 | 41.90421893 | 33.3523375 | 0.79592 |
| hypothetical protein                                                                                           | 799 | 1677527 | 1679047 | 35.52631579 | 14.8026316 | 0.41667 |
| hypothetical protein                                                                                           | 798 | 1679057 | 1680868 | 52.45720596 | 18.6361126 | 0.35526 |
| hypothetical protein                                                                                           | 797 | 1680890 | 1681189 | 35.11705686 | 7.52508361 | 0.21429 |
| zinc finger, SWIM domain protein                                                                               |     | 1681186 | 1682994 | 34.84513274 | 16.1780973 | 0.46429 |



|                                                                                                                  |     |         |         |             |            |         |
|------------------------------------------------------------------------------------------------------------------|-----|---------|---------|-------------|------------|---------|
| Mg-chelatase subunit ChID                                                                                        | 795 | 1682970 | 1684169 | 41.70141785 | 26.2718932 | 0.63    |
| hypothetical protein                                                                                             | 794 | 1684166 | 1686637 | 59.49008499 | 27.3168758 | 0.45918 |
| hypothetical protein                                                                                             | 793 | 1686598 | 1687713 | 118.3856502 | 50.4484305 | 0.42614 |
| hypothetical protein                                                                                             | 792 | 1688140 | 1688622 | 8.298755187 | 0          | 0       |
| hypothetical protein                                                                                             | 791 | 1688613 | 1688729 | 77.5862069  | 0          | 0       |
| hypothetical protein                                                                                             | 790 | 1688735 | 1688878 | 34.61538462 | 17.3076923 | 0.5     |
| hypothetical protein                                                                                             | 789 | 1688959 | 1689993 | 10.15473888 | 4.35203095 | 0.42857 |
| Transposase                                                                                                      |     | 1690170 | 1691444 | 27.08006279 | 15.8948195 | 0.58696 |
| Transposase                                                                                                      |     | 1691517 | 1691708 | 20.94240838 | 0          | 0       |
| Transposase IS116/IS110/IS902                                                                                    | 786 | 1691984 | 1693018 | 22.68244576 | 17.7514793 | 0.78261 |
| Tetratricopeptide TPR_2                                                                                          | 785 | 1693437 | 1694531 | 133.9122486 | 174.817185 | 1.30546 |
| Transposase                                                                                                      | 784 | 1694578 | 1695687 | 35.61767358 | 22.3174031 | 0.62658 |
| hypothetical protein                                                                                             | 783 | 1696186 | 1696551 | 63.01369863 | 18.4931507 | 0.29348 |
| hypothetical protein                                                                                             | 782 | 1696676 | 1696894 | 57.33944954 | 41.2844037 | 0.72    |
| Molybdate metabolism regulator                                                                                   | 781 | 1697038 | 1697850 | 67.73399015 | 69.273399  | 1.02273 |
| hypothetical protein                                                                                             | 780 | 1697909 | 1701217 | 75.87666264 | 80.9401451 | 1.06673 |
| unknown                                                                                                          | 779 | 1701223 | 1702161 | 63.43283582 | 88.7526652 | 1.39916 |
| hypothetical protein                                                                                             | 778 | 1702265 | 1702399 | 0           | 0          | #DIV/0! |
| hypothetical protein                                                                                             | 777 | 1702468 | 1704462 | 29.42668696 | 21.6894977 | 0.73707 |
| hypothetical protein                                                                                             | 776 | 1704501 | 1706612 | 181.193747  | 176.930365 | 0.97647 |
| Pyrophosphate--fructose 6-phosphate 1-phosphotransferase, beta subunit (EC 2.7.1.90)                             | 775 | 1706639 | 1708294 | 397.8851964 | 543.806647 | 1.36674 |
| Uridylate kinase (EC 2.7.4.-)                                                                                    | 774 | 1708361 | 1709047 | 155.2478134 | 193.51312  | 1.24648 |
| Transglutaminase-like                                                                                            | 773 | 1709060 | 1710688 | 148.3415233 | 172.757985 | 1.1646  |
| hypothetical protein                                                                                             | 772 | 1710688 | 1711227 | 700.3710575 | 655.380334 | 0.93576 |
| hypothetical protein                                                                                             | 771 | 1711224 | 1711808 | 924.6575342 | 1082.61986 | 1.17083 |
| RNA polymerase sigma-54 factor rpoN                                                                              | 770 | 1711798 | 1712367 | 631.8101933 | 945.079086 | 1.49583 |
| Cysteinyl-tRNA synthetase (EC 6.1.1.16)                                                                          | 769 | 1712408 | 1713889 | 198.630137  | 291.267123 | 1.46638 |
| UDP-N-acetylenolpyruvoylglucosamine reductase (EC 1.1.1.158)                                                     | 768 | 1714112 | 1714987 | 34.28571429 | 36         | 1.05    |
| hypothetical protein                                                                                             | 767 | 1715012 | 1715623 | 31.09656301 | 25.7774141 | 0.82895 |
| transcriptional regulator, Crp/Fnr family                                                                        | 766 | 1715687 | 1716922 | 279.3522267 | 340.688259 | 1.21957 |
| Serine/threonine protein kinase                                                                                  | 765 | 1716960 | 1718291 | 95.11278195 | 113.345865 | 1.1917  |
| hypothetical protein                                                                                             | 764 | 1718313 | 1718942 | 76.31160572 | 50.0794913 | 0.65625 |
| Exported protein                                                                                                 | 763 | 1718932 | 1719390 | 88.4279476  | 58.9519651 | 0.66667 |
| ATP-dependent Clp protease ATP-binding subunit clpA                                                              | 761 | 1719432 | 1721984 | 169.4749216 | 175.450627 | 1.03526 |
| Glucose-1-phosphate adenyltransferase (EC 2.7.7.27)                                                              | 762 | 1721981 | 1723252 | 418.9833201 | 373.510723 | 0.89147 |
| ATP-dependent RNA helicase                                                                                       | 760 | 1723376 | 1725676 | 122.173913  | 159.456522 | 1.30516 |
| hypothetical protein                                                                                             | 758 | 1725708 | 1726835 | 656.6104703 | 541.038154 | 0.82399 |
| hypothetical protein                                                                                             | 759 | 1726822 | 1726944 | 204.9180328 | 110.655738 | 0.54    |
| ATPase                                                                                                           | 757 | 1727188 | 1728432 | 21.3022508  | 10.85209   | 0.50943 |
| unknown                                                                                                          | 756 | 1728478 | 1729800 | 28.36611195 | 5.10590015 | 0.18    |
| Predicted amino-acid acetyltransferase (EC 2.3.1.1) complementing ArgA function in Arginine Biosynthesis pathway | 755 | 1729790 | 1730221 | 38.28306265 | 0          | 0       |
| Helicase PriA essential for oriC/DnaA-independent DNA replication                                                | 754 | 1730256 | 1732253 | 67.6014021  | 50.7010516 | 0.75    |
| DNA polymerase, bacteriophage-type                                                                               | 753 | 1732240 | 1732803 | 55.95026643 | 35.9680284 | 0.64286 |
| hypothetical protein                                                                                             |     | 1732861 | 1733073 | 21.22641509 | 0          | 0       |

|                                                                                             |     |         |         |             |            |         |
|---------------------------------------------------------------------------------------------|-----|---------|---------|-------------|------------|---------|
| hypothetical protein                                                                        | 751 | 1733113 | 1733274 | 142.8571429 | 69.8757764 | 0.48913 |
| UDP-glucose 4-epimerase (EC 5.1.3.2)                                                        | 750 | 1733549 | 1734400 | 70.5052879  | 66.0987074 | 0.9375  |
| Ribonucleotide reductase of class III (anaerobic), activating protein (EC 1.97.1.4)         | 749 | 1734410 | 1735084 | 53.41246291 | 46.735905  | 0.875   |
| Ribonucleotide reductase of class III (anaerobic), large subunit (EC 1.17.4.2)              |     | 1735134 | 1735676 | 249.0774908 | 199.261993 | 0.8     |
| Ribonucleotide reductase of class III (anaerobic), large subunit (EC 1.17.4.2)              | 747 | 1735692 | 1737737 | 229.0953545 | 162.836186 | 0.71078 |
| Ribonucleotide reductase transcriptional regulator NrdR                                     | 746 | 1737743 | 1738201 | 245.6331878 | 191.593886 | 0.78    |
| Alpha-galactosidase (EC 3.2.1.22)                                                           | 745 | 1738421 | 1739755 | 461.7691154 | 446.964018 | 0.96794 |
| Glycosyltransferase                                                                         | 744 | 1739759 | 1740892 | 170.7855252 | 188.658429 | 1.10465 |
| Uroporphyrinogen-III decarboxylase filamentous haemagglutinin family outer membrane protein | 743 | 1740906 | 1741934 | 98.73540856 | 67.8501946 | 0.68719 |
| hypothetical protein                                                                        | 742 | 1742042 | 1742728 | 29.88338192 | 6.55976676 | 0.21951 |
| hypothetical protein                                                                        | 741 | 1743026 | 1743181 | 9.677419355 | 14.516129  | 1.5     |
| Methyl-accepting chemotaxis protein                                                         | 740 | 1743199 | 1745283 | 131.7178503 | 105.806142 | 0.80328 |
| NADPH:quinone oxidoreductase                                                                | 739 | 1745414 | 1745974 | 83.03571429 | 52.2321429 | 0.62903 |
| ATP-dependent protease La (EC 3.4.21.53) Type I                                             | 738 | 1746019 | 1748565 | 152.7886881 | 239.493323 | 1.56748 |
| ATP-dependent Clp protease ATP-binding subunit clpX                                         | 737 | 1748576 | 1749829 | 568.7851971 | 626.307321 | 1.10113 |
| ATP-dependent Clp protease proteolytic subunit (EC 3.4.21.92)                               | 736 | 1749813 | 1750427 | 350.9771987 | 469.055375 | 1.33643 |
| Cell division trigger factor (EC 5.2.1.8)                                                   | 735 | 1750437 | 1751810 | 475.600874  | 658.776402 | 1.38515 |
| Core component MtsA of methionine-regulated ECF transporter                                 | 733 | 1752092 | 1752649 | 95.15260323 | 88.8689408 | 0.93396 |
| ATPase component MtsB of energizing module of methionine-regulated ECF transporter          | 732 | 1752606 | 1754390 | 76.79372197 | 46.6647982 | 0.60766 |
| Transmembrane component MtsC of energizing module of methionine-regulated ECF transporter   | 731 | 1754387 | 1755217 | 31.92771084 | 18.9759036 | 0.59434 |
| ATPase                                                                                      | 730 | 1755284 | 1756522 | 27.86752827 | 19.9919225 | 0.71739 |
| Nitroreductase                                                                              | 729 | 1756616 | 1757170 | 404.33213   | 430.505415 | 1.06473 |
| hypothetical protein                                                                        | 728 | 1757214 | 1758173 | 66.73618352 | 61.0010428 | 0.91406 |
| hypothetical protein                                                                        | 727 | 1758188 | 1758370 | 24.72527473 | 0          | 0       |
| hypothetical protein                                                                        | 726 | 1758491 | 1759129 | 47.80564263 | 31.7398119 | 0.66393 |
| D-alanine aminotransferase (EC 2.6.1.21)                                                    | 725 | 1759211 | 1760059 | 202.8301887 | 180.424528 | 0.88953 |
| hypothetical protein                                                                        | 724 | 1760062 | 1761168 | 106.6907776 | 97.6491863 | 0.91525 |
| Allophanate hydrolase subunit 1 (EC 3.5.1.54)                                               | 723 | 1761137 | 1761862 | 82.06896552 | 62.0689655 | 0.7563  |
| Allophanate hydrolase subunit 2 (EC 3.5.1.54)                                               | 722 | 1761853 | 1762815 | 62.88981289 | 56.1330561 | 0.89256 |
| Protein c14orf159 homolog, mitochondrial precursor                                          | 721 | 1762834 | 1763619 | 91.08280255 | 91.7197452 | 1.00699 |
| Lactam utilization protein LAMB                                                             | 720 | 1763630 | 1764415 | 121.0191083 | 100.318471 | 0.82895 |
| Membrane protein                                                                            | 719 | 1764440 | 1765312 | 151.9495413 | 159.977064 | 1.05283 |
| Flagellar basal-body rod protein flgF                                                       | 718 | 1765312 | 1766202 | 324.1573034 | 310.955056 | 0.95927 |
| Flagellar basal-body rod protein flgG                                                       | 717 | 1766217 | 1767017 | 315.7560356 | 297.331639 | 0.94165 |
| Flagellar protein flgJ [peptidoglycan hydrolase] (EC 3.2.1.-)                               | 715 | 1767042 | 1767482 | 165.9090909 | 122.727273 | 0.73973 |
| hypothetical protein                                                                        | 716 | 1767473 | 1767598 | 48          | 54         | 1.125   |
| Collagen binding protein Cna                                                                | 714 | 1767659 | 1769179 | 163.1578947 | 513.651316 | 3.14819 |

|                                                                                                                    |     |         |         |             |            |         |
|--------------------------------------------------------------------------------------------------------------------|-----|---------|---------|-------------|------------|---------|
| hypothetical protein                                                                                               | 713 | 1769399 | 1769518 | 0           | 0          | #DIV/0! |
| hypothetical protein                                                                                               | 712 | 1769654 | 1770256 | 58.13953488 | 22.4252492 | 0.38571 |
| Uncharacterized protein aq_1917                                                                                    | 711 | 1770395 | 1771540 | 147.1615721 | 137.554585 | 0.93472 |
| hypothetical protein                                                                                               | 710 | 1771540 | 1772736 | 89.46488294 | 71.4882943 | 0.79907 |
| ComEC/Rec2-related protein                                                                                         | 709 | 1772760 | 1774214 | 31.63686382 | 15.474553  | 0.48913 |
| Dimethyladenosine transferase (EC 2.1.1.-)                                                                         | 708 | 1774195 | 1775088 | 45.91265398 | 17.6371781 | 0.38415 |
| FIG018583: protein of unknown function                                                                             | 707 | 1775081 | 1775788 | 60.11315417 | 60.466761  | 1.00588 |
| hypothetical protein                                                                                               | 706 | 1775785 | 1776273 | 28.68852459 | 18.442623  | 0.64286 |
| Ribosomal large subunit pseudouridine synthase D (EC 4.2.1.70)                                                     | 704 | 1776273 | 1777172 | 30.03337041 | 25.0278087 | 0.83333 |
| Ribonuclease BN (EC 3.1.-.-)                                                                                       | 705 | 1777156 | 1778493 | 36.64921466 | 16.828721  | 0.45918 |
| Ribosomal large subunit pseudouridine synthase D (EC 4.2.1.70)                                                     | 702 | 1778523 | 1779290 | 35.85397653 | 23.4680574 | 0.65455 |
| Dihydrofolate synthase (EC 6.3.2.12) / Folylpolyglutamate synthase (EC 6.3.2.17)                                   | 703 | 1779259 | 1780611 | 34.39349112 | 24.9630178 | 0.72581 |
| UDP-N-acetylmuramate--alanine ligase (EC 6.3.2.8)                                                                  | 701 | 1780596 | 1782095 | 113.0753836 | 97.5650434 | 0.86283 |
| Protein yicC                                                                                                       | 700 | 1782092 | 1782958 | 48.49884527 | 49.3648961 | 1.01786 |
| Cytidylate kinase (EC 2.7.4.14)                                                                                    | 699 | 1782948 | 1783499 | 83.4845735  | 77.5862069 | 0.92935 |
| A/G-specific adenine glycosylase (EC 3.2.2.-)                                                                      | 698 | 1783472 | 1784284 | 64.03940887 | 58.1896552 | 0.90865 |
| hypothetical protein                                                                                               | 696 | 1784419 | 1785213 | 107.0528967 | 96.3476071 | 0.9     |
| Undecaprenyl-phosphate galactosephosphotransferase (EC 2.7.8.6)                                                    | 695 | 1785213 | 1786655 | 85.29819695 | 107.662968 | 1.2622  |
| putative (R)-2-hydroxyglutaryl-CoA dehydratase activator-related protein                                           | 694 | 1786703 | 1791037 | 71.75819105 | 110.059991 | 1.53376 |
| hypothetical protein                                                                                               | 692 | 1791159 | 1792793 | 153.6107711 | 143.206854 | 0.93227 |
| CTP:Inositol-1-phosphate cytidyltransferase (2.7.7.-) / Phospho-di-inositol-1-phosphate synthase (EC 2.7.8.-)      | 693 | 1792783 | 1793475 | 80.20231214 | 97.5433526 | 1.21622 |
| Glycosyltransferase                                                                                                | 691 | 1793530 | 1794573 | 74.78427613 | 88.4467881 | 1.18269 |
| Oxal/YidC membrane insertion protein                                                                               | 690 | 1794560 | 1797217 | 35.19006398 | 28.7918705 | 0.81818 |
| putative bifunctional polymerase                                                                                   | 689 | 1797217 | 1798503 | 81.25972006 | 90.9797823 | 1.11962 |
| hypothetical protein                                                                                               | 688 | 1798522 | 1800174 | 108.6561743 | 98.062954  | 0.90251 |
| hypothetical protein                                                                                               | 687 | 1800187 | 1801263 | 35.31598513 | 23.0018587 | 0.65132 |
| hypothetical protein                                                                                               | 686 | 1801260 | 1802093 | 16.80672269 | 16.2064826 | 0.96429 |
| hypothetical protein                                                                                               | 685 | 1802102 | 1802341 | 46.0251046  | 9.41422594 | 0.20455 |
| Alpha-1,4-N-acetylgalactosamine transferase PglJ (EC 2.4.1.-)                                                      | 684 | 1802380 | 1803573 | 17.18357083 | 11.3160101 | 0.65854 |
| hypothetical protein                                                                                               | 683 | 1803570 | 1804448 | 7.972665148 | 2.56264237 | 0.32143 |
| Oxal/YidC membrane insertion protein                                                                               | 682 | 1804445 | 1807222 | 11.5232265  | 6.48181491 | 0.5625  |
| putative bifunctional polymerase                                                                                   | 681 | 1807215 | 1808444 | 34.58096013 | 42.1074044 | 1.21765 |
| hypothetical protein                                                                                               | 680 | 1808623 | 1808847 | 4.464285714 | 0          | 0       |
| Glycosyl transferase, group 1                                                                                      | 679 | 1808934 | 1810055 | 27.65388046 | 28.0999108 | 1.01613 |
| UDP-glucose 4-epimerase (EC 5.1.3.2)                                                                               | 678 | 1810059 | 1811000 | 15.40913921 | 0          | 0       |
| D,D-heptose 7-phosphate kinase                                                                                     | 677 | 1811023 | 1811997 | 22.07392197 | 25.4106776 | 1.15116 |
| D-glycero-D-manno-heptose 1,7-bisphosphate phosphatase (EC 3.1.1.-); possible Histidinol-phosphatase (EC 3.1.3.15) | 676 | 1811994 | 1813304 | 13.74045802 | 6.87022901 | 0.5     |
| Beta-1,3-glycosyltransferase                                                                                       | 675 | 1813311 | 1814375 | 11.7481203  | 6.34398496 | 0.54    |
| Putative mannosyltransferase involved in polysaccharide biosynthesis                                               | 674 | 1814378 | 1815148 | 5.844155844 | 0          | 0       |
| transposase, IS30 family                                                                                           | 673 | 1815169 | 1816197 | 130.8365759 | 100.680934 | 0.76952 |

|                                                                                                                           |     |         |         |             |            |         |
|---------------------------------------------------------------------------------------------------------------------------|-----|---------|---------|-------------|------------|---------|
| Beta-1,3-glucosyltransferase                                                                                              | 672 | 1816287 | 1817264 | 5.117707267 | 4.60593654 | 0.9     |
| hypothetical protein                                                                                                      | 671 | 1817338 | 1818978 | 20.73170732 | 23.3231707 | 1.125   |
| Phospholipid-lipoplysaccharide ABC transporter                                                                            |     | 1818968 | 1820008 | 24.51923077 | 21.6346154 | 0.88235 |
| Phospholipid-lipoplysaccharide ABC transporter                                                                            |     | 1820001 | 1820675 | 7.418397626 | 3.33827893 | 0.45    |
| UDP-glucose dehydrogenase (EC 1.1.1.22)                                                                                   | 668 | 1820772 | 1822103 | 77.76108189 | 101.427498 | 1.30435 |
| ATP-dependent DNA helicase                                                                                                | 667 | 1822146 | 1823324 | 44.99151104 | 36.2903226 | 0.8066  |
| hypothetical protein                                                                                                      | 666 | 1823352 | 1824887 | 124.1042345 | 136.319218 | 1.09843 |
| 3-dehydroquinase synthase (EC 4.2.3.4)                                                                                    | 665 | 1824887 | 1825975 | 185.2022059 | 210.9375   | 1.13896 |
| Xanthine dehydrogenase, FAD binding subunit (EC 1.17.1.4)                                                                 | 664 | 1826100 | 1826972 | 483.9449541 | 361.238532 | 0.74645 |
| Xanthine dehydrogenase iron-sulfur subunit (EC 1.17.1.4)                                                                  | 663 | 1826956 | 1827441 | 109.2783505 | 171.649485 | 1.57075 |
| Xanthine dehydrogenase, molybdenum binding subunit (EC 1.17.1.4)                                                          | 662 | 1827438 | 1829537 | 237.9704621 | 275.488328 | 1.15766 |
| Putative aminotransferase, DegT family                                                                                    | 661 | 1829539 | 1830720 | 113.0397968 | 78.1117697 | 0.69101 |
| UDP-N-acetylglucosamine 4,6-dehydratase (EC 4.2.1.-)                                                                      | 660 | 1830710 | 1832203 | 139.3168118 | 122.069658 | 0.8762  |
| Transcription antitermination protein NusG                                                                                | 659 | 1832242 | 1832775 | 111.6322702 | 80.206379  | 0.71849 |
| hypothetical protein                                                                                                      | 658 | 1832850 | 1833341 | 122.1995927 | 50.407332  | 0.4125  |
| Extensin precursor                                                                                                        | 657 | 1833345 | 1834631 | 322.3172628 | 281.687403 | 0.87394 |
| Protein export cytoplasm protein SecA ATPase                                                                              |     |         |         |             |            |         |
| RNA helicase (TC 3.A.5.1.1)                                                                                               | 656 | 1834641 | 1837397 | 277.6965265 | 331.535649 | 1.19388 |
| hypothetical protein                                                                                                      | 655 | 1837484 | 1837669 | 256.7567568 | 182.432432 | 0.71053 |
| hypothetical protein                                                                                                      | 654 | 1837977 | 1838303 | 176.3803681 | 262.269939 | 1.48696 |
| transcriptional regulator, PemK family                                                                                    | 653 | 1838508 | 1838837 | 24.31610942 | 27.3556231 | 1.125   |
| hypothetical protein                                                                                                      | 652 | 1838825 | 1839073 | 22.17741935 | 27.2177419 | 1.22727 |
| hypothetical protein                                                                                                      | 651 | 1839118 | 1839246 | 7.8125      | 0          | 0       |
| hypothetical protein                                                                                                      | 650 | 1839239 | 1840048 | 217.552534  | 180.778739 | 0.83097 |
| Ferric iron ABC transporter, iron-binding protein                                                                         | 649 | 1840118 | 1841098 | 577.0408163 | 215.816327 | 0.37401 |
| Ferric iron ABC transporter, ATP-binding protein                                                                          | 648 | 1841086 | 1841874 | 300.7614213 | 154.187817 | 0.51266 |
| Ferric iron ABC transporter, permease protein                                                                             | 647 | 1841886 | 1843454 | 64.41326531 | 24.3941327 | 0.37871 |
| Cholinephosphate cytidyltransferase (EC 2.7.7.15)                                                                         | 646 | 1843454 | 1844332 | 136.6742597 | 123.006834 | 0.9     |
| lipoprotein, putative                                                                                                     | 645 | 1844351 | 1845550 | 250.2085071 | 215.804837 | 0.8625  |
| YjeF protein, function unknown                                                                                            | 644 | 1845550 | 1847145 | 303.4482759 | 242.633229 | 0.79959 |
| hypothetical protein                                                                                                      | 643 | 1847145 | 1847711 | 166.0777385 | 143.109541 | 0.8617  |
| ortholog to <i>Borrelia burgdorferi</i> BB0157                                                                            | 642 | 1847771 | 1848175 | 164.6039604 | 206.064356 | 1.25188 |
| Mutator mutT protein (7,8-dihydro-8-oxoguanine-triphosphatase) (EC 3.6.1.-)                                               | 640 | 1848178 | 1848594 | 76.92307692 | 81.1298077 | 1.05469 |
| hypothetical protein                                                                                                      | 641 | 1848565 | 1849551 | 52.73833671 | 29.6653144 | 0.5625  |
| hypothetical protein                                                                                                      | 639 | 1849613 | 1849981 | 176.6304348 | 299.592391 | 1.69615 |
| hypothetical protein                                                                                                      | 638 | 1849978 | 1850925 | 75.50158395 | 80.781415  | 1.06993 |
| 23S rRNA methyltransferase and Florfenicol/chloramphenicol resistance protein / Radical SAM family enzyme, UPF0063 family | 637 | 1850969 | 1852042 | 161.5312792 | 176.470588 | 1.09249 |
| TPR-repeat-containing protein                                                                                             | 636 | 1852046 | 1853200 | 233.9688042 | 345.103986 | 1.475   |
| Uncharacterized protein TP_0066                                                                                           | 635 | 1853193 | 1853537 | 116.2790698 | 156.976744 | 1.35    |

|                                                                 |     |         |         |             |            |         |
|-----------------------------------------------------------------|-----|---------|---------|-------------|------------|---------|
| Ribosomal RNA small subunit methyltransferase D (EC 2.1.1.-)    | 634 | 1853610 | 1854158 | 29.19708029 | 16.4233577 | 0.5625  |
| hypothetical protein                                            | 633 | 1854163 | 1854606 | 102.7088036 | 71.1060948 | 0.69231 |
| SSU ribosomal protein S6p                                       | 632 | 1854711 | 1854992 | 622.7758007 | 1169.03915 | 1.87714 |
| Single-stranded DNA-binding protein                             | 631 | 1854998 | 1855474 | 552.5210084 | 1073.0042  | 1.94202 |
| SSU ribosomal protein S18p                                      | 630 | 1855500 | 1855817 | 1126.182965 | 2207.41325 | 1.96008 |
| hypothetical protein                                            | 629 | 1855804 | 1856811 | 166.3356504 | 406.653426 | 2.44478 |
| LSU ribosomal protein L9p                                       | 628 | 1856910 | 1857572 | 329.305136  | 628.776435 | 1.9094  |
| Replicative DNA helicase (EC 3.6.1.-) [SA14-24]                 | 627 | 1857588 | 1858937 | 128.613788  | 213.491475 | 1.65994 |
| hypothetical protein                                            | 626 | 1858949 | 1859245 | 128.3783784 | 281.25     | 2.19079 |
| Uncharacterized protein TP_0598                                 | 625 | 1859264 | 1861264 | 77.5        | 106.875    | 1.37903 |
| Uncharacterized protein TP_0599                                 | 624 | 1861261 | 1861890 | 89.03020668 | 135.930048 | 1.52679 |
| Membrane-associated zinc metalloprotease                        | 623 | 1861894 | 1863252 | 75.11045655 | 87.8129602 | 1.16912 |
| 1-deoxy-D-xylulose 5-phosphate reductoisomerase (EC 1.1.1.267)  | 622 | 1863239 | 1864384 | 65.06550218 | 43.231441  | 0.66443 |
| Phosphatidate cytidyltransferase (EC 2.7.7.41)                  | 621 | 1864387 | 1865241 | 75.52693208 | 76.4051522 | 1.01163 |
| Undecaprenyl pyrophosphate synthetase (EC 2.5.1.31)             | 620 | 1865238 | 1865948 | 260.5633803 | 545.070423 | 2.09189 |
| Ribosome recycling factor                                       | 619 | 1865960 | 1866514 | 562.2743682 | 1189.98195 | 2.11637 |
| Translation elongation factor Ts                                | 618 | 1866516 | 1867370 | 665.6908665 | 1285.71429 | 1.9314  |
| SSU ribosomal protein S2p (SAe)                                 | 617 | 1867440 | 1868333 | 788.1455399 | 1539.61268 | 1.95346 |
| Septum formation protein Maf                                    | 616 | 1868478 | 1869065 | 256.3884157 | 195.48552  | 0.76246 |
| hypothetical protein                                            | 615 | 1869218 | 1869424 | 169.9029126 | 349.514563 | 2.05714 |
| hypothetical protein                                            | 614 | 1869489 | 1869761 | 257.3529412 | 231.617647 | 0.9     |
| hypothetical protein                                            | 613 | 1869733 | 1870242 | 47.90419162 | 94.3113772 | 1.96875 |
| hypothetical protein                                            | 612 | 1870239 | 1870454 | 141.8604651 | 209.302326 | 1.47541 |
| hypothetical protein                                            | 611 | 1870457 | 1870627 | 2.941176471 | 0          | 0       |
| hypothetical protein                                            | 610 | 1870948 | 1871136 | 39.89361702 | 0          | 0       |
| hypothetical protein                                            | 609 | 1871211 | 1871357 | 17.12328767 | 0          | 0       |
| hypothetical protein                                            | 608 | 1871318 | 1871617 | 10.03344482 | 0          | 0       |
| hypothetical protein                                            | 607 | 1871656 | 1871919 | 22.81368821 | 8.55513308 | 0.375   |
| hypothetical protein                                            | 606 | 1871909 | 1872331 | 8.293838863 | 0          | 0       |
| hypothetical protein                                            | 605 | 1872328 | 1872612 | 35.21126761 | 7.92253521 | 0.225   |
| hypothetical protein                                            | 604 | 1872659 | 1872850 | 0           | 0          | #DIV/0! |
| hypothetical protein                                            | 603 | 1873068 | 1873277 | 7.177033493 | 0          | 0       |
| Phage-related protein                                           |     | 1873308 | 1875848 | 20.47244094 | 2.65748031 | 0.12981 |
| hypothetical protein                                            |     | 1875852 | 1876370 | 22.2007722  | 4.34362934 | 0.19565 |
| Major capsid protein, HK97 family                               | 600 | 1876409 | 1877323 | 41.02844639 | 9.84682713 | 0.24    |
| hypothetical protein                                            | 599 | 1877388 | 1878011 | 32.90529695 | 43.3386838 | 1.31707 |
| hypothetical protein                                            | 598 | 1878087 | 1878395 | 4.87012987  | 0          | 0       |
| hypothetical protein                                            | 597 | 1878392 | 1878595 | 0           | 0          | #DIV/0! |
| hypothetical protein                                            | 596 | 1878592 | 1878909 | 9.463722397 | 7.0977918  | 0.75    |
| hypothetical protein                                            | 595 | 1879139 | 1879318 | 19.55307263 | 0          | 0       |
| Predicted ATPase                                                | 594 | 1879275 | 1880810 | 24.75570033 | 1.46579805 | 0.05921 |
| hypothetical protein                                            | 593 | 1880864 | 1881508 | 34.16149068 | 34.9378882 | 1.02273 |
| prophage LambdaSo, DNA modification methyltransferase, putative | 592 | 1881505 | 1882221 | 21.64804469 | 6.2849162  | 0.29032 |
| Excisionase                                                     | 591 | 1882218 | 1882454 | 8.474576271 | 0          | 0       |
| hypothetical protein                                            | 590 | 1882565 | 1883233 | 11.9760479  | 16.8413174 | 1.40625 |



|                                                                                                              |            |                                    |                            |                          |                    |
|--------------------------------------------------------------------------------------------------------------|------------|------------------------------------|----------------------------|--------------------------|--------------------|
| Site-specific recombinase, phage integrase family<br>hypothetical protein                                    | 589        | 1883230 1884354<br>1884397 1884531 | 85.40925267<br>0           | 106.094306<br>0          | 1.24219<br>#DIV/0! |
| DinG family ATP-dependent helicase YoaA<br>hypothetical protein                                              | 586<br>585 | 1884734 1887259<br>1887299 1888831 | 66.73267327<br>50.91383812 | 57.9207921<br>57.2780679 | 0.86795<br>1.125   |
| Iron-sulfur cluster regulator IscR<br>hypothetical protein                                                   |            | 1888828 1889253<br>1889397 1889942 | 45.88235294<br>682.5688073 | 52.9411765<br>862.844037 | 1.15385<br>1.26411 |
| Transposase                                                                                                  |            | 1890390 1890689                    | 85.28428094                | 67.7257525               | 0.79412            |
| Transposase                                                                                                  | 581        | 1890689 1890988                    | 95.31772575                | 150.501672               | 1.57895            |
| Transposase                                                                                                  |            | 1891141 1891443                    | 51.32450331                | 7.45033113               | 0.14516            |
| Integrase domain protein                                                                                     | 579        | 1891716 1892366                    | 36.15384615                | 6.92307692               | 0.19149            |
| Uracil phosphoribosyltransferase (EC 2.4.2.9)                                                                | 578        | 1892517 1893587                    | 208.8785047                | 220.794393               | 1.05705            |
| TPR domain protein, putative component of TonB<br>system                                                     | 576        | 1893584 1894543                    | 116.2669447                | 114.963504               | 0.98879            |
| hypothetical protein                                                                                         |            | 1894499 1899448                    | 39.40189937                | 28.6421499               | 0.72692            |
| YlxP-like protein                                                                                            | 575        | 1899507 1899794                    | 39.0070922                 | 39.893617                | 1.02273            |
| hypothetical protein                                                                                         | 574        | 1899798 1900430                    | 85.44303797                | 99.6835443               | 1.16667            |
| hypothetical protein                                                                                         | 573        | 1900467 1902527                    | 29.61165049                | 13.1067961               | 0.44262            |
| Endoribonuclease L-PSP                                                                                       | 572        | 1902509 1902895                    | 174.8704663                | 355.569948               | 2.03333            |
| hypothetical protein                                                                                         | 571        | 1902882 1903550                    | 205.8383234                | 191.991018               | 0.93273            |
| tRNA (guanine46-N7-)-methyltransferase (EC<br>2.1.1.33)                                                      | 570        | 1903547 1904224                    | 39.88183161                | 43.2053176               | 1.08333            |
| DNA ligase (EC 6.5.1.2)                                                                                      | 569        | 1904249 1906258                    | 57.24240916                | 71.6774515               | 1.25217            |
| ATP-dependent helicase HrpB                                                                                  | 568        | 1906227 1908806                    | 36.06048856                | 22.6832105               | 0.62903            |
| hypothetical protein                                                                                         | 567        | 1908877 1909035                    | 6.329113924                | 0                        | 0                  |
| Transposase                                                                                                  | 566        | 1909091 1910200                    | 39.67538323                | 16.2308386               | 0.40909            |
|                                                                                                              |            |                                    |                            |                          |                    |
| sensory box histidine kinase/response regulator<br>amino acid ABC transporter, amino acid-binding<br>protein | 565        | 1910537 1912087<br>1912200 1913033 | 19.35483871<br>1003.0012   | 4.35483871<br>359.243697 | 0.225<br>0.35817   |
| Amino acid ABC transporter, permease protein                                                                 | 563        | 1913062 1913778                    | 328.2122905                | 157.122905               | 0.47872            |
| ABC-type polar amino acid transport system,<br>ATPase component                                              | 562        | 1913775 1914530                    | 102.6490066                | 38.7417219               | 0.37742            |
|                                                                                                              |            |                                    |                            |                          |                    |
| L-serine dehydratase, alpha subunit (EC 4.3.1.17)<br>hypothetical protein                                    | 561<br>560 | 1914548 1916155<br>1916445 1916558 | 228.9719626<br>0           | 138.785047<br>0          | 0.60612<br>#DIV/0! |
| Integrase domain protein                                                                                     | 559        | 1916595 1917854                    | 83.39952343                | 26.8069897               | 0.32143            |
| hypothetical protein                                                                                         | 558        | 1917883 1917996                    | 8.849557522                | 79.6460177               | 9                  |
| Transposase                                                                                                  | 557        | 1918078 1919187                    | 36.97024346                | 20.2885482               | 0.54878            |
| Helix-turn-helix domain protein                                                                              | 556        | 1919420 1919767                    | 40.34582133                | 12.9682997               | 0.32143            |
| Thymidylate kinase (EC 2.7.4.9)                                                                              | 555        | 1919984 1920625                    | 63.9625585                 | 98.2839314               | 1.53659            |
| hypothetical protein                                                                                         | 554        | 1920762 1921001                    | 94.14225941                | 112.970711               | 1.2                |
| hypothetical protein                                                                                         | 553        | 1921059 1925552                    | 45.07010906                | 48.575562                | 1.07778            |
| Outer membrane protein assembly factor YaeT<br>precursor                                                     | 552        | 1925611 1928148                    | 383.7209302                | 867.363027               | 2.2604             |
| Outer membrane protein H precursor                                                                           | 551        | 1928159 1928686                    | 304.5540797                | 717.267552               | 2.35514            |
| DNA mismatch repair protein MutS                                                                             | 550        | 1928727 1931381                    | 133.7603617                | 299.26526                | 2.23732            |
| Competence protein F                                                                                         | 549        | 1931365 1932123                    | 66.62269129                | 74.2084433               | 1.11386            |
| Methyl-accepting chemotaxis protein                                                                          | 548        | 1932278 1934353                    | 158.778626                 | 188.931298               | 1.1899             |
| COG0779: clustered with transcription termination<br>protein NusA                                            | 547        | 1934486 1934980                    | 175.1012146                | 391.700405               | 2.23699            |
| Transcription termination protein NusA                                                                       | 546        | 1934993 1936480                    | 298.3706721                | 581.97556                | 1.95051            |

|                                                                                  |     |         |         |             |            |         |
|----------------------------------------------------------------------------------|-----|---------|---------|-------------|------------|---------|
| Translation initiation factor 2                                                  | 545 | 1936489 | 1939293 | 527.9957204 | 871.433666 | 1.65046 |
| Ribosome-binding factor A                                                        | 544 | 1939290 | 1939652 | 209.9447514 | 379.143646 | 1.80592 |
| tRNA pseudouridine synthase B (EC 4.2.1.70)                                      | 543 | 1939636 | 1940607 | 84.44902163 | 113.542739 | 1.34451 |
| SSU ribosomal protein S15p (S13e)                                                | 542 | 1940659 | 1940928 | 288.1040892 | 334.572491 | 1.16129 |
| Polyribonucleotide nucleotidyltransferase (EC 2.7.7.8)                           | 541 | 1940929 | 1943100 | 999.769479  | 1438.79668 | 1.43913 |
| Deoxyuridine 5'-triphosphate nucleotidohydrolase (EC 3.6.1.23)                   | 540 | 1943100 | 1943567 | 159.5289079 | 173.447537 | 1.08725 |
| membrane protein, putative                                                       | 539 | 1943569 | 1944855 | 61.81959565 | 59.4867807 | 0.96226 |
| hypothetical protein                                                             | 538 | 1944852 | 1945916 | 72.36842105 | 67.6691729 | 0.93506 |
| tRNA-guanine transglycosylase (EC 2.4.2.29)                                      | 537 | 1945928 | 1947070 | 31.98948291 | 41.4110429 | 1.29452 |
| FOG: HEAT repeat                                                                 | 535 | 1947067 | 1948566 | 77.71847899 | 75.0500334 | 0.96567 |
| Transcriptional regulator, AraC family                                           | 536 | 1948563 | 1949843 | 27.734375   | 26.3671875 | 0.9507  |
| 76K protein                                                                      | 534 | 1949869 | 1951608 | 386.7165037 | 478.723404 | 1.23792 |
| Transcription elongation factor GreA                                             | 533 | 1951641 | 1954385 | 324.5262391 | 480.502915 | 1.48063 |
| TPR domain protein                                                               | 532 | 1954397 | 1955338 | 309.7768332 | 408.873539 | 1.3199  |
| Ribulose-phosphate 3-epimerase (EC 5.1.3.1)                                      | 531 | 1955430 | 1956089 | 117.6024279 | 143.39909  | 1.21935 |
| hypothetical protein                                                             | 530 | 1956110 | 1957075 | 187.5647668 | 240.15544  | 1.28039 |
| hypothetical protein                                                             | 529 | 1957099 | 1958148 | 122.9742612 | 102.955195 | 0.83721 |
| hypothetical protein                                                             | 528 | 1958150 | 1959289 | 160.2282704 | 171.861282 | 1.0726  |
| D-tyrosyl-tRNA(Tyr) deacylase (EC 3.1.-.-)                                       | 527 | 1959307 | 1959813 | 205.5335968 | 31.1264822 | 0.15144 |
| Zinc ABC transporter, inner membrane permease protein ZnuB                       | 526 | 1959915 | 1960754 | 343.2657926 | 61.6805721 | 0.17969 |
| Zinc ABC transporter, ATP-binding protein ZnuC                                   | 525 | 1960747 | 1961478 | 563.6114911 | 107.729138 | 0.19114 |
| Periplasmic solute binding protein precursor                                     | 524 | 1961479 | 1962249 | 1031.168831 | 254.220779 | 0.24654 |
| hypothetical protein                                                             | 523 | 1962257 | 1962655 | 1070.351759 | 158.291457 | 0.14789 |
| RTX toxin, putative                                                              | 522 | 1962657 | 1964027 | 1202.919708 | 205.291971 | 0.17066 |
| hypothetical protein                                                             | 521 | 1964041 | 1964163 | 90.16393443 | 36.8852459 | 0.40909 |
| hypothetical protein                                                             | 520 | 1964271 | 1964387 | 0           | 0          | #DIV/0! |
| hypothetical protein                                                             | 519 | 1964464 | 1965210 | 513.4048257 | 150.80429  | 0.29373 |
| serine/threonine kinase                                                          | 518 | 1965188 | 1966228 | 676.9230769 | 157.932692 | 0.23331 |
| TonB-dependent receptor                                                          |     | 1966243 | 1968273 | 250.2463054 | 48.7684729 | 0.19488 |
| Ribose-phosphate pyrophosphokinase (EC 2.7.6.1)                                  | 516 | 1968343 | 1969443 | 188.1818182 | 204.545455 | 1.08696 |
| hypothetical protein                                                             | 515 | 1969507 | 1969629 | 8.196721311 | 0          | 0       |
| RecA protein                                                                     | 514 | 1969648 | 1970949 | 630.6687164 | 584.550346 | 0.92687 |
| 2-amino-4-hydroxy-6-hydroxymethyldihydropteridine pyrophosphokinase (EC 2.7.6.3) | 512 | 1970986 | 1971477 | 231.1608961 | 270.366599 | 1.1696  |
| Prokaryotic ATPase                                                               | 513 | 1971474 | 1972619 | 30.13100437 | 7.86026201 | 0.26087 |
| hypothetical protein                                                             | 511 | 1972611 | 1972817 | 9.708737864 | 0          | 0       |
| Segregation and condensation protein A                                           | 510 | 1972774 | 1973529 | 168.2119205 | 199.668874 | 1.18701 |
| Segregation and condensation protein B                                           | 509 | 1973510 | 1974061 | 490.0181488 | 567.604356 | 1.15833 |
| Ribosomal large subunit pseudouridine synthase B (EC 5.4.99.-)                   | 508 | 1974108 | 1974827 | 148.8178025 | 206.536857 | 1.38785 |
| SSU ribosomal protein S1p                                                        | 507 | 1974821 | 1977244 | 621.6383947 | 929.975176 | 1.49601 |
| Acetoacetate metabolism regulatory protein atoC                                  | 506 | 1977256 | 1978767 | 188.1254169 | 228.152101 | 1.21277 |
| TPR repeat-containing protein TP_0282                                            | 505 | 1978776 | 1979477 | 263.1954351 | 263.195435 | 1       |
| hypothetical protein                                                             | 504 | 1979513 | 1980259 | 69.70509383 | 111.595174 | 1.60096 |
| hypothetical protein                                                             | 503 | 1980304 | 1980519 | 16.27906977 | 10.4651163 | 0.64286 |

|                                                                      |     |         |         |             |            |         |
|----------------------------------------------------------------------|-----|---------|---------|-------------|------------|---------|
| transposase, mutator family                                          | 502 | 1980567 | 1981808 | 66.88154714 | 38.0741338 | 0.56928 |
| hypothetical protein                                                 | 501 | 1981891 | 1982433 | 1.84501845  | 0          | 0       |
| PIN domain protein                                                   | 500 | 1982768 | 1983163 | 2.53164557  | 0          | 0       |
| hypothetical protein                                                 | 499 | 1983160 | 1983306 | 0           | 0          | #DIV/0! |
| Transposase IS4 family protein                                       | 498 | 1983757 | 1985295 | 42.58777633 | 20.4811443 | 0.48092 |
| hypothetical protein                                                 | 497 | 1985482 | 1985613 | 0           | 0          | #DIV/0! |
| Potassium uptake protein TrkH                                        | 496 | 1985671 | 1987122 | 13.43900758 | 6.20261888 | 0.46154 |
| Integrase                                                            | 495 | 1987490 | 1988536 | 45.41108987 | 34.416826  | 0.75789 |
| Radical SAM domain protein                                           | 494 | 1988700 | 1990988 | 35.18356643 | 30.4851399 | 0.86646 |
| Rod shape-determining protein rodA                                   | 493 | 1991140 | 1992459 | 31.84230478 | 20.4700531 | 0.64286 |
| Cell division protein ftsI [Peptidoglycan synthetase] (EC 2.4.1.129) | 492 | 1992461 | 1994317 | 111.1111111 | 103.15534  | 0.9284  |
| Rod shape-determining protein mreD                                   | 491 | 1994317 | 1994820 | 49.70178926 | 35.7852883 | 0.72    |
| Rod shape-determining protein mreC                                   | 490 | 1994813 | 1995697 | 117.081448  | 83.9932127 | 0.71739 |
| Rod shape-determining protein mreB                                   | 489 | 1995702 | 1996730 | 348.973607  | 398.093842 | 1.14076 |
| TPR domain protein                                                   | 488 | 1996740 | 1997603 | 169.1772885 | 250.289687 | 1.47945 |
| hypothetical protein                                                 | 487 | 1997610 | 1997732 | 86.06557377 | 165.983607 | 1.92857 |
| Intergenic (RNaseP Like)                                             |     | 1997820 | 1998040 | 33766.00985 | 25769.7044 | 0.76318 |
| Zn-ribbon protein, possibly nucleic acid-binding                     | 486 | 1998094 | 1998930 | 331.3397129 | 433.313397 | 1.30776 |
| RNA polymerase sigma factor RpoD                                     | 485 | 1999016 | 2000779 | 345.150312  | 372.660238 | 1.0797  |
| DNA primase (EC 2.7.7.-)                                             | 484 | 2000776 | 2002638 | 194.4146079 | 194.548872 | 1.00069 |
| COG1559 protein yceG like                                            | 483 | 2002639 | 2003715 | 85.96654275 | 66.9144981 | 0.77838 |
| hypothetical protein                                                 | 482 | 2003758 | 2003928 | 129.4117647 | 39.7058824 | 0.30682 |
| Metal-dependent hydrolases of the beta-lactamase superfamily I       | 481 | 2003931 | 2004872 | 194.2369264 | 177.694771 | 0.91484 |
| hypothetical protein                                                 | 480 | 2004872 | 2005432 | 87.5        | 84.375     | 0.96429 |
| S-adenosylmethionine:tRNA ribosyltransferase-isomerase (EC 5.-.-.-)  | 479 | 2005429 | 2006478 | 81.50619638 | 72.9265968 | 0.89474 |
| Holliday junction DNA helicase RuvB                                  | 478 | 2006494 | 2007561 | 145.267104  | 126.522962 | 0.87097 |
| Holliday junction DNA helicase RuvA                                  | 477 | 2007569 | 2008171 | 106.3122924 | 104.651163 | 0.98438 |
| Ferredoxin 3 fused to uncharacterized domain                         | 476 | 2008407 | 2009015 | 13.98026316 | 0          | 0       |
| Hcp transcriptional regulator HcpR (Crp/Fnr family)                  |     | 2009232 | 2009783 | 9.98185118  | 0          | 0       |
| UPF0173 metal-dependent hydrolase PF1764                             | 474 | 2009870 | 2010484 | 39.90228013 | 40.3094463 | 1.0102  |
| Crossover junction endodeoxyribonuclease ruvC (EC 3.1.22.4)          | 473 | 2010648 | 2011184 | 160.4477612 | 159.514925 | 0.99419 |
| hypothetical protein                                                 | 472 | 2011165 | 2011905 | 746.6216216 | 1064.18919 | 1.42534 |
| Uncharacterized protein TP_0777                                      | 471 | 2012043 | 2012282 | 1615.062762 | 2730.12552 | 1.69041 |
| N-acetylneuraminate synthase (EC 2.5.1.56)                           | 469 | 2012356 | 2013474 | 45.16994633 | 36.2254025 | 0.80198 |
| hypothetical protein                                                 |     | 2013482 | 2013595 | 30.97345133 | 39.8230088 | 1.28571 |
| hypothetical protein                                                 | 467 | 2013589 | 2014383 | 208.4382872 | 263.539043 | 1.26435 |
| Histidyl-tRNA synthetase (EC 6.1.1.21)                               | 466 | 2014398 | 2015723 | 190.1886792 | 183.396226 | 0.96429 |
| Aspartate aminotransferase (EC 2.6.1.1)                              | 465 | 2015735 | 2016946 | 360.4459125 | 343.724195 | 0.95361 |
| Arabinose operon protein araM                                        | 464 | 2016996 | 2018378 | 145.0795948 | 128.617945 | 0.88653 |
| hypothetical protein                                                 | 463 | 2018392 | 2018538 | 75.34246575 | 107.876712 | 1.43182 |
| hypothetical protein                                                 | 462 | 2018585 | 2019247 | 39.27492447 | 40.7854985 | 1.03846 |
| Aspartokinase (EC 2.7.2.4) / Homoserine dehydrogenase (EC 1.1.1.3)   | 461 | 2019277 | 2021775 | 128.5028022 | 125.20016  | 0.9743  |
| Transcriptional regulator, ArsR family                               | 460 | 2021775 | 2022080 | 80.32786885 | 88.5245902 | 1.10204 |
| Cysteine desulfurase (EC 2.8.1.7)                                    | 459 | 2022138 | 2023283 | 98.68995633 | 98.2532751 | 0.99558 |
| Thiamine biosynthesis protein thil                                   | 458 | 2023280 | 2024458 | 107.8098472 | 129.881154 | 1.20472 |
| Hemerythrin-like iron-binding protein                                | 457 | 2024471 | 2024878 | 493.8574939 | 519.65602  | 1.05224 |

|                                                                                                            |     |         |         |             |            |         |
|------------------------------------------------------------------------------------------------------------|-----|---------|---------|-------------|------------|---------|
| hypothetical protein                                                                                       | 456 | 2024906 | 2026990 | 125.4798464 | 110.12476  | 0.87763 |
| TPR domain protein, putative component of TonB system                                                      | 455 | 2026987 | 2027712 | 204.137931  | 192.413793 | 0.94257 |
| 5'-nucleotidase surE (EC 3.1.3.5)                                                                          | 454 | 2027714 | 2028502 | 187.1827411 | 202.728426 | 1.08305 |
| Galactokinase (EC 2.7.1.6)                                                                                 | 453 | 2028504 | 2029673 | 233.1052181 | 279.084688 | 1.19725 |
| hypothetical protein                                                                                       | 452 | 2029689 | 2029820 | 15.26717557 | 17.1755725 | 1.125   |
| Adenylate cyclase (EC 4.6.1.1)                                                                             | 451 | 2029860 | 2032577 | 61.09679794 | 40.5778432 | 0.66416 |
| Multimeric flavodoxin WrbA family protein                                                                  | 450 | 2032613 | 2033233 | 174.1935484 | 188.709677 | 1.08333 |
| lipoprotein, putative                                                                                      | 449 | 2033567 | 2033938 | 187.3315364 | 133.423181 | 0.71223 |
| Adenylate cyclase (EC 4.6.1.1)                                                                             | 448 | 2033949 | 2035868 | 66.18030224 | 53.9343408 | 0.81496 |
| Biotin-protein ligase (EC 6.3.4.15) / Biotin operon repressor                                              | 447 | 2035955 | 2036974 | 447.0068695 | 50.7850834 | 0.11361 |
| Core component BioY of biotin ECF transporter                                                              | 446 | 2037027 | 2037605 | 141.0034602 | 23.3564014 | 0.16564 |
| ATPase component CbiO of energizing module of cobalt ECF transporter                                       | 445 | 2037595 | 2038347 | 202.7925532 | 20.9441489 | 0.10328 |
| Transmembrane component of general energizing module of ECF transporters                                   | 444 | 2038340 | 2038981 | 78.78315133 | 3.51014041 | 0.04455 |
| putative outer membrane protein probably involved in nutrient binding                                      | 443 | 2039003 | 2041588 | 33.0754352  | 5.22243714 | 0.15789 |
| hypothetical protein                                                                                       | 442 | 2041594 | 2042355 | 24.96714849 | 20.696452  | 0.82895 |
| MotA/TolQ/ExbB proton channel family protein                                                               | 441 | 2042365 | 2043021 | 33.53658537 | 17.1493902 | 0.51136 |
| hypothetical protein                                                                                       | 440 | 2043018 | 2043419 | 19.95012469 | 5.61097257 | 0.28125 |
| Biopolymer transport protein ExbD/TolR                                                                     | 439 | 2043416 | 2043814 | 21.35678392 | 16.959799  | 0.79412 |
| Ferric siderophore transport system, periplasmic binding protein TonB                                      | 437 | 2043807 | 2044430 | 41.73354735 | 18.0577849 | 0.43269 |
| Alkanesulfonates ABC transporter ATP-binding protein / Sulfonate ABC transporter, ATP-binding subunit SsuB | 438 | 2044423 | 2045172 | 29.37249666 | 15.0200267 | 0.51136 |
| ABC-type nitrate/sulfonate/bicarbonate transport system, permease component                                | 436 | 2045169 | 2045909 | 22.97297297 | 21.2837838 | 0.92647 |
| ABC-type nitrate/sulfonate/bicarbonate transport systems, periplasmic components                           | 435 | 2045913 | 2046920 | 129.59285   | 122.889772 | 0.94828 |
| Transcriptional regulator, TetR family                                                                     | 434 | 2047012 | 2047728 | 55.86592179 | 31.424581  | 0.5625  |
| Putative efflux protein                                                                                    | 433 | 2047703 | 2048917 | 154.4481054 | 203.871499 | 1.32    |
| Oxidoreductase, aldo/keto reductase family                                                                 | 432 | 2049011 | 2050165 | 337.9549393 | 368.500867 | 1.09038 |
| Pyruvate, phosphate dikinase (EC 2.7.9.1)                                                                  | 431 | 2050375 | 2053275 | 514.8531952 | 450.777202 | 0.87555 |
| RNA helicase, putative                                                                                     | 430 | 2053379 | 2055904 | 189.0873016 | 158.035714 | 0.83578 |
| hypothetical protein                                                                                       |     | 2055935 | 2056195 | 221.1538462 | 181.730769 | 0.82174 |
| hypothetical protein                                                                                       |     | 2056321 | 2056554 | 17.16738197 | 9.65665236 | 0.5625  |
| hypothetical protein                                                                                       | 427 | 2056553 | 2056774 | 9.049773756 | 0          | 0       |
| hypothetical protein                                                                                       | 426 | 2056862 | 2056975 | 26.54867257 | 0          | 0       |
| hypothetical protein                                                                                       | 425 | 2057071 | 2057481 | 40.24390244 | 21.9512195 | 0.54545 |
| hypothetical protein                                                                                       | 424 | 2057671 | 2058492 | 132.7649208 | 172.655298 | 1.30046 |
| Two component transcriptional regulator, LuxR family                                                       | 423 | 2058563 | 2059183 | 152.4193548 | 148.790323 | 0.97619 |
| Sensor histidine kinase                                                                                    | 422 | 2059180 | 2059932 | 196.8085106 | 185.505319 | 0.94257 |
| hypothetical protein                                                                                       | 421 | 2059911 | 2060705 | 99.49622166 | 107.68262  | 1.08228 |
| hypothetical protein                                                                                       | 420 | 2060729 | 2060866 | 65.69343066 | 82.1167883 | 1.25    |
| hypothetical protein                                                                                       | 419 | 2060949 | 2061461 | 223.6328125 | 175.78125  | 0.78603 |
| Similar to coproporphyrinogen III oxidase, oxygen-independent (EC 1.3.99.22)                               | 418 | 2061486 | 2062661 | 28.08510638 | 17.2340426 | 0.61364 |

|                                                                     |     |         |         |             |            |         |
|---------------------------------------------------------------------|-----|---------|---------|-------------|------------|---------|
| Signal peptidase I (EC 3.4.21.89)                                   | 417 | 2062665 | 2063387 | 60.94182825 | 49.8614958 | 0.81818 |
| Signal peptidase I (EC 3.4.21.89)                                   | 416 | 2063391 | 2064386 | 195.4773869 | 241.959799 | 1.23779 |
| S-layer protein                                                     | 415 | 2064454 | 2065941 | 104.5729657 | 96.8392737 | 0.92605 |
| SsrA-binding protein                                                | 414 | 2065938 | 2066396 | 335.1528384 | 397.925764 | 1.1873  |
| Uncharacterized protein TP_0183 precursor                           | 413 | 2066472 | 2067338 | 106.2355658 | 114.318707 | 1.07609 |
| Septum formation initiator family protein                           | 412 | 2067343 | 2067783 | 131.8181818 | 92.0454545 | 0.69828 |
| Topoisomerase IV subunit A (EC 5.99.1.-)                            | 411 | 2067923 | 2069941 | 223.9841427 | 205.153617 | 0.91593 |
| hypothetical protein                                                | 410 | 2069943 | 2070800 | 70.01166861 | 78.7631272 | 1.125   |
| Uncharacterized protein TP_0177                                     | 409 | 2070804 | 2072243 | 30.22932592 | 18.7630299 | 0.62069 |
| hypothetical protein                                                |     | 2072266 | 2073876 | 32.60869565 | 15.3726708 | 0.47143 |
| COG1355, Predicted dioxygenase                                      | 408 | 2073871 | 2074737 | 36.95150115 | 25.9815242 | 0.70313 |
| Uncharacterized protein TP_0172                                     | 405 | 2074815 | 2075936 | 107.4933095 | 102.363961 | 0.95228 |
| hypothetical protein                                                | 406 | 2075924 | 2076853 | 74.27341227 | 84.7685684 | 1.1413  |
| gliding motility protein GldG                                       |     | 2076843 | 2078456 | 88.34469932 | 119.962802 | 1.35789 |
| gliding motility protein GldF                                       | 403 | 2078458 | 2079192 | 38.82833787 | 39.8501362 | 1.02632 |
| ABC-type multidrug transport system, ATPase component               | 402 | 2079189 | 2080130 | 219.4473964 | 208.023379 | 0.94794 |
| Ribonuclease Z (EC 3.1.26.11)                                       | 401 | 2080144 | 2081157 | 111.5498519 | 122.161895 | 1.09513 |
| putative enzyme; Not classified                                     | 400 | 2081196 | 2083676 | 18.5483871  | 6.35080645 | 0.34239 |
| hypothetical protein                                                | 398 | 2083938 | 2084180 | 45.45454545 | 65.0826446 | 1.43182 |
| hypothetical protein                                                | 399 | 2084161 | 2084277 | 17.24137931 | 0          | 0       |
| hypothetical protein                                                | 397 | 2084301 | 2084423 | 39.13043478 | 0          | 0       |
| hypothetical protein                                                | 396 | 2084851 | 2084994 | 24.47552448 | 0          | 0       |
| hypothetical protein                                                | 395 | 2085041 | 2085364 | 26.31578947 | 0          | 0       |
| hypothetical protein                                                | 394 | 2085384 | 2085659 | 20          | 0          | 0       |
| hypothetical protein                                                | 393 | 2086349 | 2086498 | 33.55704698 | 0          | 0       |
| hypothetical protein                                                | 392 | 2087180 | 2087356 | 2.840909091 | 0          | 0       |
| hypothetical protein                                                | 391 | 2087632 | 2087898 | 22.55639098 | 16.9172932 | 0.75    |
| ATP-dependent DNA helicase                                          | 390 | 2088094 | 2089452 | 38.78406709 | 18.8679245 | 0.48649 |
| Nucleotidyltransferase domain protein                               | 389 | 2089445 | 2089777 | 6.060606061 | 13.6363636 | 2.25    |
| hypothetical protein                                                | 388 | 2089770 | 2090192 | 8.293838863 | 0          | 0       |
| Nucleotidyltransferase domain protein                               | 387 | 2090185 | 2090505 | 6.25        | 7.03125    | 1.125   |
| trans-Golgi membrane protein p230                                   | 386 | 2090593 | 2092761 | 11.0701107  | 3.11346863 | 0.28125 |
| Putative type IIS restriction /modification enzyme, N-terminal half | 385 | 2092758 | 2095904 | 22.40940877 | 15.0190718 | 0.67021 |
| Superfamily II DNA/RNA helicases, SNF2 family                       | 384 | 2095904 | 2099170 | 50.67360686 | 57.1800367 | 1.1284  |
| Integrase domain protein                                            | 383 | 2099318 | 2100553 | 46.55870445 | 18.2186235 | 0.3913  |
| Conserved protein                                                   | 382 | 2100805 | 2101203 | 32.66331658 | 22.6130653 | 0.69231 |
| Chromosome undetermined scaffold_92, whole genome shotgun sequence  | 381 | 2101200 | 2102015 | 10.42944785 | 5.52147239 | 0.52941 |
| putative membrane protein                                           | 380 | 2102018 | 2102908 | 17.41573034 | 12.6404494 | 0.72581 |
| hypothetical protein                                                | 379 | 2102997 | 2103179 | 30.21978022 | 12.3626374 | 0.40909 |
| hypothetical protein                                                | 378 | 2103578 | 2103775 | 32.99492386 | 22.8426396 | 0.69231 |
| Transposase (class II)                                              | 377 | 2104050 | 2105081 | 47.04170708 | 24.0058196 | 0.51031 |
| hypothetical protein                                                | 376 | 2105211 | 2105699 | 26.63934426 | 4.61065574 | 0.17308 |
| Phage integrase                                                     | 375 | 2105711 | 2107000 | 29.09231963 | 12.2187742 | 0.42    |
| hypothetical protein                                                | 374 | 2107329 | 2107487 | 0           | 0          | #DIV/0! |
| hypothetical protein                                                | 373 | 2107487 | 2107972 | 52.57731959 | 18.556701  | 0.35294 |
| hypothetical protein                                                | 372 | 2107969 | 2108229 | 119.2307692 | 103.846154 | 0.87097 |
| hypothetical protein                                                | 371 | 2108341 | 2108553 | 4.716981132 | 10.6132075 | 2.25    |
| hypothetical protein                                                | 370 | 2108693 | 2109919 | 29.77161501 | 5.50570962 | 0.18493 |



|                                                                                                            |     |         |         |             |            |         |
|------------------------------------------------------------------------------------------------------------|-----|---------|---------|-------------|------------|---------|
| hypothetical protein                                                                                       | 369 | 2109956 | 2110630 | 17.06231454 | 0          | 0       |
| hypothetical protein                                                                                       | 368 | 2110693 | 2111190 | 18.10865191 | 4.52716298 | 0.25    |
| hypothetical protein                                                                                       | 367 | 2111302 | 2111664 | 13.8121547  | 37.2928177 | 2.7     |
| hypothetical protein                                                                                       | 366 | 2111709 | 2111897 | 10.63829787 | 0          | 0       |
| Chromosome (plasmid) partitioning protein ParA / Sporulation initiation inhibitor protein soj              |     |         |         |             |            |         |
| hypothetical protein                                                                                       | 365 | 2112034 | 2112804 | 6.493506494 | 0          | 0       |
| hypothetical protein                                                                                       | 364 | 2112809 | 2113087 | 3.597122302 | 0          | 0       |
| hypothetical protein                                                                                       | 363 | 2113336 | 2114040 | 13.49431818 | 0          | 0       |
| hypothetical protein                                                                                       | 362 | 2114030 | 2114272 | 0           | 0          | #DIV/0! |
| Plasmid recombination enzyme                                                                               | 361 | 2114521 | 2115603 | 11.09057301 | 2.07948244 | 0.1875  |
| DNA repair protein RadA domain protein                                                                     | 360 | 2115657 | 2116676 | 23.06182532 | 4.41609421 | 0.19149 |
| hypothetical protein                                                                                       | 359 | 2116660 | 2116800 | 7.142857143 | 0          | 0       |
| hypothetical protein                                                                                       | 358 | 2117205 | 2117591 | 0           | 0          | #DIV/0! |
| hypothetical protein                                                                                       | 357 | 2117625 | 2118119 | 2.024291498 | 4.55465587 | 2.25    |
| Phage integrase                                                                                            | 356 | 2118209 | 2119390 | 22.86198137 | 7.62066046 | 0.33333 |
| Response regulator                                                                                         | 353 | 2119815 | 2120825 | 232.1782178 | 153.712871 | 0.66205 |
| Response regulator                                                                                         | 352 | 2120822 | 2121880 | 132.7977316 | 146.73913  | 1.10498 |
| Chorismate mutase II (EC 5.4.99.5)                                                                         | 351 | 2121951 | 2122319 | 139.9456522 | 128.396739 | 0.91748 |
| hypothetical protein                                                                                       | 350 | 2122316 | 2122663 | 79.25072046 | 45.389049  | 0.57273 |
| Uncharacterized protein TP_0788                                                                            | 349 | 2122738 | 2123562 | 90.41262136 | 60.0728155 | 0.66443 |
| Uncharacterized protein TP_0733                                                                            | 348 | 2123691 | 2124326 | 387.4015748 | 584.645669 | 1.50915 |
| hypothetical protein                                                                                       | 347 | 2124341 | 2125471 | 661.5044248 | 1290.26549 | 1.9505  |
| ATPase, AAA family                                                                                         | 346 | 2125494 | 2127821 | 180.7047701 | 351.955307 | 1.94768 |
| Fumarate reductase flavoprotein subunit (EC 1.3.99.1)                                                      | 345 | 2127831 | 2130191 | 119.9152542 | 94.3855932 | 0.7871  |
| hypothetical protein                                                                                       | 344 | 2130254 | 2131144 | 69.66292135 | 35.3932584 | 0.50806 |
| Endo-1,4-beta-xylanase B precursor                                                                         | 343 | 2131198 | 2132019 | 101.0962241 | 120.584653 | 1.19277 |
| Multi antimicrobial extrusion protein (Na <sup>+</sup> )/drug antiporter), MATE family of MDR efflux pumps |     |         |         |             |            |         |
| Flagellin protein flaA                                                                                     | 342 | 2132023 | 2133372 | 32.24610823 | 21.6827279 | 0.67241 |
| Flagellin protein flaA                                                                                     | 341 | 2133592 | 2134452 | 2394.988067 | 2706.44391 | 1.13004 |
| Flagellin protein flaA                                                                                     | 340 | 2134725 | 2135579 | 5607.142857 | 5733.02108 | 1.02245 |
| hypothetical protein                                                                                       | 339 | 2135696 | 2135836 | 492.8571429 | 578.571429 | 1.17391 |
| Flagellin protein flaG                                                                                     | 338 | 2135793 | 2136110 | 984.2271293 | 887.223975 | 0.90144 |
| Flagellar hook-associated protein fliD                                                                     | 337 | 2136200 | 2138179 | 272.3597777 | 165.992926 | 0.60946 |
| hypothetical protein                                                                                       | 336 | 2138183 | 2139025 | 80.16627078 | 48.0997625 | 0.6     |
| hypothetical protein                                                                                       | 335 | 2139090 | 2140211 | 82.06958073 | 50.1784121 | 0.61141 |
| hypothetical protein                                                                                       | 334 | 2140254 | 2140520 | 99.62406015 | 93.0451128 | 0.93396 |
| ATPase YjeE, predicted to have essential role in cell wall biosynthesis                                    | 333 | 2140498 | 2140968 | 230.8510638 | 186.702128 | 0.80876 |
| Inactive homolog of metal-dependent proteases, putative molecular chaperone                                | 332 | 2140965 | 2141660 | 95.68345324 | 48.5611511 | 0.50752 |
| Response regulator                                                                                         | 331 | 2141677 | 2142753 | 187.267658  | 127.555762 | 0.68114 |
| Carbon storage regulator homolog                                                                           | 330 | 2142768 | 2143001 | 51.50214592 | 96.5665236 | 1.875   |
| Transmembrane protein                                                                                      | 329 | 2143004 | 2143453 | 216.0356347 | 185.412027 | 0.85825 |
| Flagellar hook-associated protein flgL                                                                     | 328 | 2143477 | 2144724 | 256.0192616 | 216.693419 | 0.84639 |
| Flagellar hook-associated protein flgK                                                                     | 327 | 2144744 | 2146642 | 207.3234984 | 175.44784  | 0.84625 |
| hypothetical protein                                                                                       | 326 | 2146664 | 2147167 | 221.6699801 | 174.45328  | 0.787   |
| Integrase                                                                                                  | 321 | 2147869 | 2149083 | 76.19439868 | 63.014827  | 0.82703 |
| hypothetical protein                                                                                       | 320 | 2149152 | 2149295 | 3.496503497 | 0          | 0       |
| hypothetical protein                                                                                       | 319 | 2149442 | 2149684 | 0           | 0          | #DIV/0! |

|                                                                              |     |         |         |             |            |         |
|------------------------------------------------------------------------------|-----|---------|---------|-------------|------------|---------|
| hypothetical protein                                                         | 318 | 2149769 | 2150080 | 397.1061093 | 340.032154 | 0.85628 |
| Transposase and inactivated derivatives                                      | 317 | 2150092 | 2151045 | 132.2140609 | 75.5508919 | 0.57143 |
| hypothetical protein                                                         | 316 | 2151047 | 2151292 | 6.12244898  | 0          | 0       |
| Transposase and inactivated derivatives                                      | 315 | 2151853 | 2152806 | 107.5550892 | 82.633788  | 0.76829 |
| hypothetical protein                                                         | 314 | 2152818 | 2153129 | 400.3215434 | 303.858521 | 0.75904 |
| hypothetical protein                                                         | 313 | 2154900 | 2155031 | 0           | 0          | #DIV/0! |
| DNA polymerase III alpha subunit (EC 2.7.7.7)                                | 312 | 2155207 | 2158170 | 23.79345258 | 2.27809652 | 0.09574 |
| DNA polymerase IV (EC 2.7.7.7)                                               | 311 | 2158163 | 2159380 | 29.17009039 | 14.7904684 | 0.50704 |
| COG1801: Uncharacterized conserved protein                                   | 310 | 2159364 | 2160167 | 45.51122195 | 8.41645885 | 0.18493 |
| hypothetical protein                                                         | 309 | 2160286 | 2160408 | 0           | 0          | #DIV/0! |
| Integrase domain protein                                                     | 308 | 2160815 | 2162050 | 51.01214575 | 16.3967611 | 0.32143 |
| hypothetical protein                                                         | 307 | 2162362 | 2163312 | 39.47368421 | 42.6315789 | 1.08    |
| hypothetical protein                                                         | 306 | 2163322 | 2163519 | 78.68020305 | 79.9492386 | 1.01613 |
| hypothetical protein                                                         | 305 | 2163586 | 2164812 | 29.77161501 | 18.3523654 | 0.61644 |
| hypothetical protein                                                         | 304 | 2164970 | 2165266 | 32.09459459 | 38.0067568 | 1.18421 |
| hypothetical protein                                                         | 303 | 2165611 | 2165994 | 236.2924282 | 346.605744 | 1.46685 |
| Pirin                                                                        | 302 | 2166022 | 2166729 | 61.23919308 | 48.6311239 | 0.79412 |
| hypothetical protein                                                         | 300 | 2167097 | 2167294 | 10.15228426 | 22.8426396 | 2.25    |
| Outer membrane autotransporter barrel                                        |     | 2167151 | 2179324 | 28.91645445 | 5.72989403 | 0.19815 |
| TPR repeat precursor                                                         | 299 | 2179395 | 2180057 | 32.47734139 | 10.1963746 | 0.31395 |
| Ferredoxin                                                                   | 298 | 2180371 | 2181159 | 26.64974619 | 14.2766497 | 0.53571 |
| FemA protein                                                                 | 297 | 2181152 | 2182306 | 176.3431542 | 228.119584 | 1.29361 |
| Methionyl-tRNA synthetase (EC 6.1.1.10)                                      | 296 | 2182308 | 2184656 | 226.362862  | 305.68569  | 1.35042 |
| Alpha-amylase (EC 3.2.1.1)                                                   | 295 | 2184703 | 2186481 | 91.1136108  | 101.237345 | 1.11111 |
| hypothetical protein                                                         | 294 | 2186440 | 2186562 | 8.196721311 | 0          | 0       |
| hypothetical protein                                                         | 293 | 2186584 | 2187165 | 98.10671256 | 81.3253012 | 0.82895 |
| hypothetical protein                                                         | 292 | 2187162 | 2187779 | 52.67423015 | 83.8735818 | 1.59231 |
| hypothetical protein                                                         | 291 | 2187776 | 2188225 | 158.1291759 | 225.501114 | 1.42606 |
| Electron transport complex protein rnfD                                      | 290 | 2188222 | 2189313 | 87.07607699 | 113.428048 | 1.30263 |
| Electron transport complex protein rnfC                                      | 289 | 2189313 | 2190638 | 234.3396226 | 326.037736 | 1.3913  |
| hypothetical protein                                                         | 288 | 2190649 | 2192049 | 93.21428571 | 151.071429 | 1.62069 |
| hypothetical protein                                                         | 287 | 2192057 | 2192545 | 168.0327869 | 216.70082  | 1.28963 |
| Ribosomal large subunit pseudouridine synthase C (EC 4.2.1.70)               | 286 | 2192606 | 2193586 | 64.79591837 | 34.4387755 | 0.5315  |
| hypothetical protein                                                         | 285 | 2193600 | 2194127 | 336.8121442 | 345.825427 | 1.02676 |
| Deoxyribonuclease-1 precursor (EC 3.1.21.1)                                  | 284 | 2194151 | 2195029 | 108.7699317 | 74.3166287 | 0.68325 |
| hypothetical protein                                                         | 283 | 2195038 | 2195772 | 18.39237057 | 30.653951  | 1.66667 |
| Glucose-6-phosphate 1-dehydrogenase (EC 1.1.1.49)                            | 282 | 2195846 | 2197306 | 54.45205479 | 63.1849315 | 1.16038 |
| hypothetical protein                                                         | 281 | 2197366 | 2198229 | 158.7485516 | 146.002317 | 0.91971 |
| hypothetical protein                                                         | 280 | 2198241 | 2199407 | 135.5060034 | 133.147513 | 0.98259 |
| hypothetical protein                                                         | 279 | 2199506 | 2200231 | 128.9655172 | 158.275862 | 1.22727 |
| hypothetical protein                                                         | 278 | 2200256 | 2200408 | 16.44736842 | 14.8026316 | 0.9     |
| Poly(A) polymerase (EC 2.7.7.19)                                             | 277 | 2200413 | 2201636 | 183.5650041 | 195.012265 | 1.06236 |
| Lysophospholipase (EC 3.1.1.5); Monoglyceride lipase (EC 3.1.1.23); putative | 276 | 2201651 | 2202610 | 252.8675704 | 279.19708  | 1.10412 |
| 23S rRNA (Uracil-5-) -methyltransferase rumA (EC 2.1.1.-)                    | 275 | 2202682 | 2203845 | 339.2089424 | 265.047291 | 0.78137 |
| hypothetical protein                                                         | 274 | 2203835 | 2205565 | 140.1734104 | 124.855491 | 0.89072 |
| Antigen, p83/100                                                             |     | 2205633 | 2207252 | 658.4311303 | 717.109327 | 1.08912 |
| conserved hypothetical protein; possible membrane protein                    | 272 | 2207356 | 2207769 | 16.94915254 | 5.44794189 | 0.32143 |

|                                                             |     |         |         |             |            |         |
|-------------------------------------------------------------|-----|---------|---------|-------------|------------|---------|
| hypothetical protein                                        | 271 | 2208070 | 2208219 | 6.711409396 | 0          | 0       |
| hypothetical protein                                        | 270 | 2208648 | 2208818 | 30.76923077 | 0          | 0       |
| hypothetical protein                                        | 269 | 2208860 | 2209735 | 6.320224719 | 0          | 0       |
| hypothetical protein                                        | 268 | 2209772 | 2210635 | 23.46570397 | 16.2454874 | 0.69231 |
| transposase, mutator family                                 | 267 | 2210672 | 2211913 | 71.71635778 | 45.3263497 | 0.63202 |
| Transposase (class II)                                      | 266 | 2212223 | 2213254 | 44.13191077 | 19.6411251 | 0.44505 |
| hypothetical protein                                        | 265 | 2213310 | 2213846 | 9.009009009 | 0          | 0       |
| FOG: TPR repeat                                             | 264 | 2213848 | 2214588 | 13.56852103 | 3.05291723 | 0.225   |
| hypothetical protein                                        | 263 | 2214676 | 2215821 | 2.620087336 | 0          | 0       |
| hypothetical protein                                        | 262 | 2215870 | 2216097 | 77.09251101 | 0          | 0       |
| hypothetical protein                                        | 261 | 2216216 | 2216980 | 10.01335113 | 0          | 0       |
| hypothetical protein                                        | 260 | 2217022 | 2217135 | 123.8938053 | 39.8230088 | 0.32143 |
| hypothetical protein                                        | 259 | 2217417 | 2217671 | 9.842519685 | 8.85826772 | 0.9     |
| Transcriptional regulator, MerR family                      | 258 | 2217672 | 2218385 | 7.713884993 | 9.46704067 | 1.22727 |
| hypothetical protein                                        | 257 | 2218385 | 2218513 | 11.71875    | 17.578125  | 1.5     |
| Iron-sulfur cluster assembly scaffold protein NifU          | 256 | 2218544 | 2219137 | 203.2040472 | 227.655987 | 1.12033 |
| Cysteine desulfurase (EC 2.8.1.7)                           | 255 | 2219152 | 2220312 | 155.4404145 | 172.927461 | 1.1125  |
| Phosphomannomutase (EC 5.4.2.8) /                           |     |         |         |             |            |         |
| Phosphoglucosamine mutase (EC 5.4.2.10)                     | 254 | 2220429 | 2222225 | 104.1202673 | 250.556793 | 2.40642 |
| hypothetical protein                                        | 252 | 2222249 | 2222650 | 132.1695761 | 263.715711 | 1.99528 |
| hypothetical protein                                        | 253 | 2222647 | 2223198 | 34.48275862 | 53.0852995 | 1.53947 |
| hypothetical protein                                        | 251 | 2223218 | 2223466 | 32.25806452 | 0          | 0       |
| hypothetical protein                                        | 250 | 2223465 | 2223596 | 49.61832061 | 0          | 0       |
| Ribonuclease HII (EC 3.1.26.4)                              | 249 | 2223752 | 2224327 | 26.08695652 | 19.5652174 | 0.75    |
| hypothetical protein                                        | 248 | 2224324 | 2227281 | 70.84883328 | 50.2198174 | 0.70883 |
| Hypoxanthine-guanine phosphoribosyltransferase (EC 2.4.2.8) | 247 | 2227290 | 2227919 | 70.74721781 | 57.2337043 | 0.80899 |
| GlpG protein (membrane protein of glp regulon)              | 246 | 2227951 | 2228511 | 45.53571429 | 32.1428571 | 0.70588 |
| Exodeoxyribonuclease III (EC 3.1.11.2)                      | 245 | 2228508 | 2229287 | 101.4120668 | 138.639281 | 1.36709 |
| hypothetical protein                                        | 244 | 2229407 | 2229529 | 8.196721311 | 0          | 0       |
| hypothetical protein                                        | 243 | 2229743 | 2236333 | 22.91350531 | 11.6084977 | 0.50662 |
| PIN (PilT N terminus) domain                                | 242 | 2236917 | 2237255 | 72.4852071  | 39.9408284 | 0.55102 |
| ATP-dependent Clp protease adaptor protein clpS             | 241 | 2237364 | 2237678 | 81.21019108 | 42.9936306 | 0.52941 |
| ATP-dependent Clp protease ATP-binding subunit clpA         | 240 | 2237694 | 2240084 | 198.9112228 | 180.904523 | 0.90947 |
| Leucyl/phenylalanyl-tRNA--protein transferase (EC 2.3.2.6)  | 239 | 2240094 | 2240888 | 113.9798489 | 102.015113 | 0.89503 |
| Probable M18-family aminopeptidase 1 (EC 3.4.11.-)          | 238 | 2240893 | 2242353 | 149.3150685 | 146.40411  | 0.9805  |
| Glutamyl-tRNA synthetase (EC 6.1.1.17);                     |     |         |         |             |            |         |
| Glutamyl-tRNA(Gln) synthetase                               | 237 | 2242276 | 2243880 | 107.8553616 | 98.19202   | 0.9104  |
| hypothetical protein                                        | 236 | 2243928 | 2244719 | 138.4323641 | 156.447535 | 1.13014 |
| NAD-dependent protein deacetylase of SIR2 family            | 235 | 2244757 | 2245512 | 143.7086093 | 104.304636 | 0.72581 |
| Putative ankyrin repeat-containing protein TP_0502          | 234 | 2245514 | 2246488 | 63.6550308  | 53.1314168 | 0.83468 |
| Adenylate cyclase (EC 4.6.1.1)                              | 233 | 2246533 | 2247510 | 47.59467758 | 39.1504606 | 0.82258 |
| Inosose dehydratase (EC 4.2.1.44)                           | 232 | 2247556 | 2248455 | 61.7352614  | 72.5806452 | 1.17568 |
| Epi-inositol hydrolase                                      | 231 | 2248456 | 2250336 | 89.09574468 | 84.9734043 | 0.95373 |
| Myo-inositol 2-dehydrogenase (EC 1.1.1.18)                  | 230 | 2250368 | 2251387 | 96.17271835 | 88.3218842 | 0.91837 |

|                                                                                  |     |         |         |             |            |         |
|----------------------------------------------------------------------------------|-----|---------|---------|-------------|------------|---------|
| hypothetical protein                                                             | 229 | 2251418 | 2252719 | 40.73789393 | 39.7770945 | 0.97642 |
| hypothetical protein                                                             | 228 | 2252735 | 2254291 | 31.16966581 | 21.6902314 | 0.69588 |
| hypothetical protein                                                             | 227 | 2254310 | 2255710 | 37.85714286 | 27.3214286 | 0.7217  |
| hypothetical protein                                                             | 226 | 2255713 | 2256498 | 77.07006369 | 68.7898089 | 0.89256 |
| hypothetical protein                                                             | 225 | 2256507 | 2257715 | 48.01324503 | 52.1523179 | 1.08621 |
| hypothetical protein                                                             | 224 | 2257708 | 2258199 | 137.4745418 | 146.639511 | 1.06667 |
| hypothetical protein                                                             | 223 | 2258243 | 2258437 | 54.12371134 | 57.9896907 | 1.07143 |
| Xylulose kinase (EC 2.7.1.17)                                                    | 222 | 2258471 | 2259952 | 100.9453072 | 91.1546253 | 0.90301 |
| Fructose-bisphosphate aldolase class II (EC 4.1.2.13)                            | 221 | 2259954 | 2260859 | 136.4640884 | 221.270718 | 1.62146 |
| L-fucose isomerase related protein                                               | 220 | 2260871 | 2262265 | 111.9081779 | 85.5451937 | 0.76442 |
| Ribose operon repressor                                                          | 219 | 2262280 | 2263293 | 29.12142152 | 6.66337611 | 0.22881 |
| Transposase subunit                                                              |     | 2263945 | 2264172 | 0           | 9.91189427 | #DIV/0! |
| Transposase subunit                                                              |     | 2264176 | 2264295 | 8.403361345 | 0          | 0       |
| transposase, IS30 family                                                         | 216 | 2264471 | 2265157 | 59.76676385 | 49.1982507 | 0.82317 |
| hypothetical protein                                                             | 215 | 2265243 | 2265632 | 16.70951157 | 11.5681234 | 0.69231 |
| hypothetical protein                                                             | 214 | 2265738 | 2265854 | 4.310344828 | 0          | 0       |
| ABC transporter, substrate binding protein                                       | 213 | 2265919 | 2267229 | 101.9083969 | 84.1603053 | 0.82584 |
| Predicted rhamnose oligosaccharide ABC transport system, permease component      | 212 | 2267260 | 2268108 | 26.53301887 | 10.6132075 | 0.4     |
| Predicted rhamnose oligosaccharide ABC transport system, permease component 2    | 211 | 2268105 | 2269037 | 31.11587983 | 28.9699571 | 0.93103 |
| transcriptional regulator, AraC family                                           | 210 | 2269115 | 2270002 | 50.16910936 | 35.5129651 | 0.70787 |
| Putative isomerase                                                               | 208 | 2270059 | 2271558 | 72.04803202 | 60.0400267 | 0.83333 |
| Arabinan endo-1,5-alpha-L-arabinosidase (EC 3.2.1.99)                            | 209 | 2271548 | 2272471 | 148.4290358 | 117.009751 | 0.78832 |
| Alpha-galactosidase (EC 3.2.1.22)                                                | 207 | 2272483 | 2273892 | 118.5237757 | 108.587651 | 0.91617 |
| possible Bacterial Ig-like domain (group 1)                                      | 206 | 2274059 | 2276404 | 18.97654584 | 4.79744136 | 0.25281 |
| hypothetical protein                                                             | 205 | 2276474 | 2276920 | 30.2690583  | 10.0896861 | 0.33333 |
| hypothetical protein                                                             | 204 | 2276933 | 2280070 | 30.92126235 | 2.15173733 | 0.06959 |
| hypothetical protein                                                             | 203 | 2280144 | 2281556 | 21.60056657 | 3.18696884 | 0.14754 |
| hypothetical protein                                                             | 202 | 2281678 | 2282871 | 14.66890193 | 0          | 0       |
| Probable poly(beta-D-mannuronate) O-acetylase (EC 2.3.1.-)                       | 201 | 2282882 | 2284327 | 19.03114187 | 4.67128028 | 0.24545 |
| Long-chain-fatty-acid--CoA ligase (EC 6.2.1.3)                                   | 200 | 2284327 | 2285988 | 13.84708007 | 5.41842264 | 0.3913  |
| Transcriptional regulator                                                        | 199 | 2286105 | 2287007 | 16.07538803 | 0          | 0       |
| Multiple sugar ABC transporter, membrane-spanning permease protein MsmF          | 198 | 2287097 | 2288077 | 21.42857143 | 6.8877551  | 0.32143 |
| Multiple sugar ABC transporter, membrane-spanning permease protein MsmG          | 197 | 2288090 | 2289010 | 30.43478261 | 12.2282609 | 0.40179 |
| ABC transporter, substrate-binding protein                                       | 196 | 2289036 | 2290607 | 51.24124761 | 34.3730108 | 0.67081 |
| Endo-1,4-beta-xylanase A precursor (EC 3.2.1.8)                                  | 195 | 2290614 | 2292104 | 40.60402685 | 24.1610738 | 0.59504 |
| Sorbitol dehydrogenase (EC 1.1.1.14)                                             |     | 2292312 | 2293265 | 182.5813221 | 203.043022 | 1.11207 |
| Putative dihydroxyacetone kinase (EC 2.7.1.29), dihydroxyacetone binding subunit | 193 | 2293290 | 2294285 | 160.8040201 | 144.723618 | 0.9     |
| Putative dihydroxyacetone kinase (EC 2.7.1.29), ADP-binding subunit              | 192 | 2294295 | 2294939 | 107.9192547 | 66.3819876 | 0.61511 |
| Ribose 5-phosphate isomerase B (EC 5.3.1.6)                                      | 191 | 2294942 | 2295400 | 141.9213974 | 68.7772926 | 0.48462 |
| N-Acetyl-D-glucosamine ABC transport system, sugar-binding protein               | 190 | 2295506 | 2296756 | 497.2       | 541.8      | 1.0897  |

|                                                                                  |     |         |         |             |            |         |
|----------------------------------------------------------------------------------|-----|---------|---------|-------------|------------|---------|
| N-Acetyl-D-glucosamine ABC transport system, permease protein 1                  | 189 | 2296767 | 2297705 | 105.010661  | 76.7590618 | 0.73096 |
| N-Acetyl-D-glucosamine ABC transport system, permease protein 2                  | 188 | 2297707 | 2298546 | 115.613826  | 174.31466  | 1.50773 |
| hypothetical protein                                                             | 186 | 2298869 | 2299891 | 84.63796477 | 112.279843 | 1.32659 |
| Uncharacterized protein BB_0265                                                  | 185 | 2299910 | 2300488 | 104.6712803 | 81.7474048 | 0.78099 |
| hypothetical protein                                                             | 184 | 2300490 | 2300831 | 115.8357771 | 98.973607  | 0.85443 |
| hypothetical protein                                                             | 183 | 2300812 | 2302776 | 180.2443992 | 183.299389 | 1.01695 |
| RNA polymerase sigma factor for flagellar operon                                 | 182 | 2302790 | 2303563 | 355.7567917 | 390.03881  | 1.09636 |
| hypothetical protein                                                             | 181 | 2303604 | 2304323 | 131.4325452 | 147.079277 | 1.11905 |
| Flagellar synthesis regulator fleN                                               | 180 | 2304341 | 2305276 | 150.802139  | 202.139037 | 1.34043 |
| Flagellar biosynthesis protein flhF                                              | 179 | 2305279 | 2306598 | 103.1084155 | 139.878696 | 1.35662 |
| Flagellar biosynthesis protein flhA                                              | 178 | 2306616 | 2308745 | 118.3654298 | 154.297792 | 1.30357 |
| Flagellar biosynthesis protein flhB                                              | 177 | 2308745 | 2309866 | 82.96164139 | 112.399643 | 1.35484 |
| Flagellar biosynthesis protein fliR                                              | 176 | 2309863 | 2310678 | 34.96932515 | 55.2147239 | 1.57895 |
| Flagellar biosynthesis protein fliQ                                              | 175 | 2310692 | 2310958 | 41.35338346 | 50.7518797 | 1.22727 |
| Flagellar biosynthesis protein fliP                                              | 174 | 2310972 | 2311787 | 50.61728395 | 86.1111111 | 1.70122 |
| Flagellar biosynthesis protein fliZ                                              | 173 | 2311789 | 2312187 | 140.7035176 | 141.331658 | 1.00446 |
| hypothetical protein                                                             | 172 | 2312225 | 2312422 | 347.715736  | 239.847716 | 0.68978 |
| Flagellar motor switch protein fliN                                              | 171 | 2312578 | 2313696 | 392.6654741 | 374.329159 | 0.9533  |
| Flagellar motor switch protein fliM                                              | 170 | 2313693 | 2314724 | 648.4907498 | 633.15482  | 0.97635 |
| Flagellar biosynthesis protein fliL                                              | 169 | 2314737 | 2315291 | 156.1371841 | 158.393502 | 1.01445 |
| Flagellar motor rotation protein motB                                            | 168 | 2315338 | 2316069 | 208.5048011 | 166.666667 | 0.79934 |
| Flagellar motor rotation protein motA                                            | 167 | 2316086 | 2316868 | 276.2148338 | 250.319693 | 0.90625 |
| Flagellar protein flbD                                                           | 166 | 2316874 | 2317071 | 213.1979695 | 262.690355 | 1.23214 |
| Flagellar hook protein flgE                                                      | 165 | 2317083 | 2318483 | 857.8571429 | 639.642857 | 0.74563 |
| Flagellar basal-body rod modification protein flgD                               | 164 | 2318509 | 2318946 | 544.6224256 | 458.237986 | 0.84139 |
| Flagellar hook-length control protein fliK                                       | 163 | 2318964 | 2320385 | 289.9366643 | 213.757917 | 0.73726 |
| Flagellar protein flbB                                                           | 162 | 2320457 | 2321095 | 583.8557994 | 507.836991 | 0.8698  |
| hypothetical protein                                                             | 161 | 2321132 | 2322202 | 29.43925234 | 16.8224299 | 0.57143 |
| Gluconokinase (EC 2.7.1.12) / oxidoreductase domain                              | 160 | 2322202 | 2323317 | 81.16591928 | 58.5201794 | 0.72099 |
| D-mannonate oxidoreductase (EC 1.1.1.57)                                         | 159 | 2323411 | 2325009 | 78.8485607  | 47.8723404 | 0.60714 |
| Autoinducer 2 (AI-2) ABC transport system, periplasmic AI-2 binding protein LsrB | 158 | 2325036 | 2326115 | 82.94717331 | 47.9610751 | 0.57821 |
| Putative pheromone precursor lipoprotein                                         | 157 | 2326125 | 2326586 | 68.329718   | 34.164859  | 0.5     |
| Sensory box histidine kinase/response regulator                                  | 156 | 2326590 | 2329376 | 30.50969131 | 7.26848528 | 0.23824 |
| Xanthosine/inosine triphosphate pyrophosphatase ; HAM1 protein homolog           | 155 | 2329422 | 2330027 | 57.85123967 | 59.5041322 | 1.02857 |
| ATP-dependent DNA helicase Rep                                                   | 154 | 2330094 | 2332196 | 50.26202954 | 39.6617437 | 0.7891  |
| Iron-dependent repressor IdeR/DtxR                                               | 153 | 2332230 | 2332607 | 181.6976127 | 226.790451 | 1.24818 |
| Ribosomal RNA small subunit methyltransferase F (EC 2.1.1.-)                     | 152 | 2332757 | 2333392 | 64.56692913 | 24.8031496 | 0.38415 |
| tRNA pseudouridine synthase A (EC 4.2.1.70)                                      | 151 | 2333393 | 2334139 | 74.39678284 | 45.2412869 | 0.60811 |
| hypothetical protein                                                             | 150 | 2334154 | 2335014 | 84.88372093 | 91.5697674 | 1.07877 |
| Holo-[acyl-carrier protein] synthase (EC 2.7.8.7)                                | 149 | 2335029 | 2335409 | 96.05263158 | 130.263158 | 1.35616 |
| hypothetical protein                                                             |     | 2335406 | 2336377 | 134.9124614 | 122.811535 | 0.91031 |



|                                                                                                                                      |     |         |         |             |            |         |
|--------------------------------------------------------------------------------------------------------------------------------------|-----|---------|---------|-------------|------------|---------|
| ABC transporter, permease protein ybbP / Tlr1762 protein                                                                             | 147 | 2336367 | 2337215 | 123.2311321 | 92.865566  | 0.75359 |
| Dihydropteroate synthase (EC 2.5.1.15)                                                                                               | 146 | 2337254 | 2338096 | 105.7007126 | 96.1995249 | 0.91011 |
| 1-deoxy-D-xylulose 5-phosphate synthase (EC 2.2.1.7)                                                                                 | 145 | 2338093 | 2340030 | 69.69540527 | 95.2503872 | 1.36667 |
| Methylmalonyl-CoA epimerase (EC 5.1.99.1)                                                                                            | 144 | 2340381 | 2340848 | 387.5802998 | 342.077088 | 0.8826  |
| hypothetical protein                                                                                                                 | 143 | 2341038 | 2341280 | 33.05785124 | 46.4876033 | 1.40625 |
| Death on curing protein                                                                                                              | 142 | 2341277 | 2341663 | 93.2642487  | 69.9481865 | 0.75    |
| putative autotransporter protein                                                                                                     | 141 | 2341894 | 2346528 | 61.8256366  | 42.7276651 | 0.6911  |
| Outer membrane protein                                                                                                               |     | 2346543 | 2348147 | 55.48628429 | 29.457606  | 0.5309  |
| helix-turn-helix, type 11 domain protein                                                                                             | 139 | 2348384 | 2349199 | 46.01226994 | 35.8895706 | 0.78    |
| tRNA delta(2)-isopentenylpyrophosphate transferase (EC 2.5.1.8)                                                                      | 138 | 2349206 | 2350192 | 135.9026369 | 203.093306 | 1.4944  |
| DNA-directed RNA polymerase omega chain (EC 2.7.7.6) (RNAP omega subunit) (Transcriptase omega chain) (RNA polymerase omega subunit) | 137 | 2350198 | 2350473 | 385.4545455 | 540        | 1.40094 |
| HflK protein                                                                                                                         | 136 | 2350451 | 2351422 | 324.92276   | 319.773429 | 0.98415 |
| HflC protein                                                                                                                         | 135 | 2351422 | 2352399 | 320.3684749 | 368.474923 | 1.15016 |
| hypothetical protein                                                                                                                 | 134 | 2352402 | 2353862 | 171.9178082 | 140.239726 | 0.81574 |
| Fumarate hydratase class I, aerobic (EC 4.2.1.2)                                                                                     | 133 | 2353859 | 2355505 | 53.15917375 | 35.5407047 | 0.66857 |
| NADH pyrophosphatase (EC 3.6.1.22)                                                                                                   | 132 | 2355519 | 2356301 | 55.62659847 | 37.4040921 | 0.67241 |
| hypothetical protein                                                                                                                 | 131 | 2356375 | 2356758 | 124.0208877 | 105.744125 | 0.85263 |
| COG1180: Radical SAM, Pyruvate-formate lyase-activating enzyme like                                                                  | 130 | 2356789 | 2357628 | 43.50417163 | 48.2717521 | 1.10959 |
| hypothetical protein                                                                                                                 | 129 | 2358002 | 2358301 | 528.4280936 | 594.481605 | 1.125   |
| hypothetical protein                                                                                                                 | 128 | 2358314 | 2359228 | 77.68052516 | 39.3873085 | 0.50704 |
| Isoleucyl-tRNA synthetase (EC 6.1.1.5)                                                                                               | 127 | 2359251 | 2362454 | 132.8835896 | 139.08064  | 1.04664 |
| Endonuclease III (EC 4.2.99.18)                                                                                                      | 126 | 2362491 | 2363180 | 39.18722787 | 19.5936139 | 0.5     |
| Transposase IS4 family                                                                                                               |     | 2363437 | 2363610 | 0           | 0          | #DIV/0! |
| hypothetical protein                                                                                                                 | 124 | 2363658 | 2363774 | 4.310344828 | 0          | 0       |
| hypothetical protein                                                                                                                 | 123 | 2363902 | 2364591 | 19.59361393 | 16.3280116 | 0.83333 |
| Legionella vir region protein                                                                                                        | 122 | 2364825 | 2365262 | 22.88329519 | 15.4462243 | 0.675   |
| hypothetical protein                                                                                                                 | 121 | 2365315 | 2365521 | 70.38834951 | 43.6893204 | 0.62069 |
| hypothetical protein                                                                                                                 | 120 | 2365550 | 2366017 | 52.46252677 | 48.1798715 | 0.91837 |
| type I phosphodiesterase/nucleotide pyrophosphatase family protein                                                                   | 119 | 2366270 | 2367559 | 83.39798293 | 66.3304888 | 0.79535 |
| 23S rRNA (guanine-N-2-) -methyltransferase rmlL (EC 2.1.1.-)                                                                         | 118 | 2367626 | 2368639 | 42.44817374 | 28.8746298 | 0.68023 |
| hypothetical protein                                                                                                                 | 117 | 2368632 | 2369171 | 88.12615955 | 125.231911 | 1.42105 |
| LSU ribosomal protein L31p                                                                                                           | 116 | 2369249 | 2369452 | 485.2216749 | 886.699507 | 1.82741 |
| Transcription termination factor Rho                                                                                                 | 115 | 2369525 | 2371405 | 421.1941904 | 479.289941 | 1.13793 |
| Similar to C-terminal domain of competence/damage-inducible protein CinA                                                             | 114 | 2371430 | 2371924 | 103.2388664 | 100.202429 | 0.97059 |
| hypothetical protein                                                                                                                 | 113 | 2371917 | 2372333 | 346.1538462 | 367.788462 | 1.0625  |
| Phosphate regulon transcriptional regulatory protein phoB                                                                            | 112 | 2372336 | 2373010 | 170.6231454 | 193.620178 | 1.13478 |
| Apolipoprotein N-acyltransferase (EC 2.3.1.-) / Copper homeostasis protein CutE                                                      | 111 | 2373011 | 2374672 | 141.180012  | 173.389524 | 1.22814 |
| Integration host factor alpha subunit                                                                                                | 110 | 2374669 | 2374983 | 457.0063694 | 566.082803 | 1.23868 |
| SSU ribosomal protein S20p                                                                                                           | 109 | 2375011 | 2375286 | 850.9090909 | 1464.54545 | 1.72115 |

|                                                                                                                                    |     |         |         |             |            |         |
|------------------------------------------------------------------------------------------------------------------------------------|-----|---------|---------|-------------|------------|---------|
| hypothetical protein                                                                                                               | 108 | 2375369 | 2375539 | 305.8823529 | 410.294118 | 1.34135 |
| Uncharacterized protein TP_0447 precursor                                                                                          | 107 | 2375631 | 2376779 | 106.7073171 | 101.916376 | 0.9551  |
| hypothetical protein                                                                                                               | 106 | 2376818 | 2376955 | 43.79562044 | 0          | 0       |
| 1-hydroxy-2-methyl-2-(E)-butenyl 4-diphosphate synthase (EC 1.17.4.3)                                                              | 105 | 2376963 | 2378072 | 165.4643823 | 233.318305 | 1.41008 |
| V-type ATPase, subunit K                                                                                                           | 104 | 2378087 | 2378494 | 401.7199017 | 469.90172  | 1.16972 |
| V-type ATP synthase subunit I (EC 3.6.3.14)                                                                                        | 103 | 2378576 | 2380510 | 270.6065319 | 372.083981 | 1.375   |
| V-type ATP synthase subunit D 1 (EC 3.6.3.14) (V type ATPase subunit D 1)                                                          | 102 | 2380515 | 2381135 | 783.8709677 | 874.596774 | 1.11574 |
| V-type ATP synthase beta chain 1 (EC 3.6.3.14) (V-type ATPase subunit B 1)                                                         | 101 | 2381150 | 2382448 | 1023.137255 | 1252.94118 | 1.22461 |
| V-type ATP synthase subunit A (EC 3.6.3.14)                                                                                        | 100 | 2382460 | 2384220 | 688.5813149 | 829.152249 | 1.20415 |
| hypothetical protein                                                                                                               | 99  | 2384217 | 2384762 | 622.9357798 | 792.66055  | 1.27246 |
| V-type ATP synthase subunit E (EC 3.6.3.14) (V-type ATPase subunit E)                                                              | 98  | 2384766 | 2385377 | 602.2913257 | 754.909984 | 1.2534  |
| L-arabinose-specific 1-epimerase (mutarotase)                                                                                      | 97  | 2385473 | 2386504 | 322.9873909 | 467.022308 | 1.44595 |
| DnaJ domain protein                                                                                                                | 96  | 2386553 | 2386978 | 145.8823529 | 132.352941 | 0.90726 |
| oxidoreductase, Gfo/ldh/MocA family                                                                                                | 95  | 2386984 | 2388009 | 292.6829268 | 232.682927 | 0.795   |
| Uncharacterized sugar kinase yegV                                                                                                  | 94  | 2388013 | 2388909 | 65.29017857 | 42.6897321 | 0.65385 |
| Response regulator of zinc sigma-54-dependent two-component system                                                                 | 93  | 2388906 | 2390270 | 64.38557763 | 64.5695364 | 1.00286 |
| two-component sensor PilS                                                                                                          | 92  | 2390271 | 2391482 | 35.92072667 | 24.1535921 | 0.67241 |
| DNA polymerase III delta prime subunit (EC 2.7.7.7)                                                                                | 91  | 2391484 | 2392836 | 97.26331361 | 73.2248521 | 0.75285 |
| Uncharacterized protein TP_0522                                                                                                    | 90  | 2392838 | 2393353 | 64.0776699  | 39.3203883 | 0.61364 |
| UDP-N-acetylglucosamine--N-acetylmuramyl-(pentapeptide) pyrophosphoryl-undecaprenol N-acetylglucosamine transferase (EC 2.4.1.227) | 89  | 2393353 | 2394423 | 100.4672897 | 79.9065421 | 0.79535 |
| GGDEF domain/EAL domain protein                                                                                                    | 88  | 2394442 | 2395917 | 19.3220339  | 0          | 0       |
| Glycerol-3-phosphate ABC transporter, periplasmic glycerol-3-phosphate-binding protein (TC 3.A.1.1.3)                              | 87  | 2395901 | 2397358 | 10.63829787 | 1.54426905 | 0.14516 |
| hypothetical protein                                                                                                               | 86  | 2397355 | 2397525 | 11.76470588 | 0          | 0       |
| hypothetical protein                                                                                                               | 85  | 2397565 | 2397690 | 12          | 0          | 0       |
| hypothetical protein                                                                                                               | 84  | 2397844 | 2399235 | 24.08339324 | 4.85262401 | 0.20149 |
| Aspartyl-tRNA(Asn) amidotransferase subunit B (EC 6.3.5.-); Glutamyl-tRNA(Gln) amidotransferase subunit B (EC 6.3.5.-)             | 83  | 2399282 | 2400763 | 80.68872384 | 100.270088 | 1.24268 |
| Aspartyl-tRNA(Asn) amidotransferase subunit A (EC 6.3.5.-); Glutamyl-tRNA(Gln) amidotransferase subunit A (EC 6.3.5.-)             | 82  | 2400779 | 2402284 | 120.5980066 | 195.847176 | 1.62397 |
| hypothetical protein                                                                                                               | 81  | 2402299 | 2402622 | 54.17956656 | 48.7616099 | 0.9     |
| hypothetical protein                                                                                                               | 80  | 2402725 | 2402961 | 127.1186441 | 85.8050847 | 0.675   |
| branched-chain amino acid transport                                                                                                | 79  | 2402991 | 2403338 | 11.52737752 | 6.48414986 | 0.5625  |
| branched-chain amino acid transport                                                                                                | 78  | 2403335 | 2404066 | 43.09165527 | 40.0136799 | 0.92857 |
| Rossmann fold nucleotide-binding protein Smf possibly involved in DNA uptake                                                       | 77  | 2404115 | 2404831 | 77.51396648 | 56.5642458 | 0.72973 |
| COG2078: Uncharacterized ACR                                                                                                       | 76  | 2404881 | 2405456 | 73.04347826 | 97.826087  | 1.33929 |
| Queuosine biosynthesis QueD, PTPS-I / Folate biosynthesis, PTPS-III                                                                | 75  | 2405466 | 2405840 | 98.93048128 | 48.1283422 | 0.48649 |
| hypothetical protein                                                                                                               | 74  | 2405799 | 2405927 | 39.0625     | 0          | 0       |

|                                                                                                                                                                                                                                                                                                                                                                       |    |         |         |             |            |         |
|-----------------------------------------------------------------------------------------------------------------------------------------------------------------------------------------------------------------------------------------------------------------------------------------------------------------------------------------------------------------------|----|---------|---------|-------------|------------|---------|
| UDP-N-acetylmuramoylalanine--2,6-diaminopimelate ligase (EC 6.3.2.13)                                                                                                                                                                                                                                                                                                 | 73 | 2405924 | 2407636 | 106.6004673 | 86.7406542 | 0.8137  |
| hypothetical protein                                                                                                                                                                                                                                                                                                                                                  | 72 | 2407657 | 2408685 | 90.46692607 | 94.114786  | 1.04032 |
| UDP-N-acetylmuramoylalanine--D-glutamate ligase (EC 6.3.2.9)                                                                                                                                                                                                                                                                                                          | 71 | 2408743 | 2410188 | 109.3425606 | 84.083045  | 0.76899 |
| Lysyl-tRNA synthetase-related protein                                                                                                                                                                                                                                                                                                                                 | 69 | 2410192 | 2411181 | 57.12841254 | 38.6754297 | 0.67699 |
| hypothetical protein                                                                                                                                                                                                                                                                                                                                                  | 70 | 2411178 | 2412095 | 38.16793893 | 26.9901854 | 0.70714 |
| Oligoendopeptidase F (EC 3.4.24.-)                                                                                                                                                                                                                                                                                                                                    | 68 | 2412094 | 2413893 | 242.881072  | 242.462312 | 0.99828 |
| Homolog of plant auxin-responsive GH3-like protein                                                                                                                                                                                                                                                                                                                    | 67 | 2414049 | 2415758 | 746.0410557 | 849.853372 | 1.13915 |
| hypothetical protein                                                                                                                                                                                                                                                                                                                                                  | 66 | 2415976 | 2416722 | 69.70509383 | 120.643432 | 1.73077 |
| hypothetical protein                                                                                                                                                                                                                                                                                                                                                  | 65 | 2416901 | 2417056 | 54.83870968 | 14.516129  | 0.26471 |
| transcriptional regulator, PemK family                                                                                                                                                                                                                                                                                                                                | 64 | 2417098 | 2417445 | 129.6829971 | 90.778098  | 0.7     |
| hypothetical protein                                                                                                                                                                                                                                                                                                                                                  | 63 | 2417432 | 2417590 | 91.7721519  | 113.924051 | 1.24138 |
| hypothetical protein                                                                                                                                                                                                                                                                                                                                                  | 62 | 2417726 | 2417881 | 19.35483871 | 0          | 0       |
| Translation elongation factor P; Translation initiation factor 5A                                                                                                                                                                                                                                                                                                     | 61 | 2417950 | 2418513 | 277.0870337 | 411.634103 | 1.48558 |
| hypothetical protein                                                                                                                                                                                                                                                                                                                                                  | 60 | 2418704 | 2419828 | 46.70818505 | 50.044484  | 1.07143 |
| Leucyl-tRNA synthetase (EC 6.1.1.4)                                                                                                                                                                                                                                                                                                                                   | 59 | 2419900 | 2422365 | 198.3353634 | 210.109622 | 1.05937 |
| Putative kinase                                                                                                                                                                                                                                                                                                                                                       | 58 | 2422407 | 2423408 | 134.3656344 | 112.387612 | 0.83643 |
| Mannitol-1-phosphate 5-dehydrogenase (EC 1.1.1.17)                                                                                                                                                                                                                                                                                                                    | 56 | 2423418 | 2424623 | 138.1742739 | 186.721992 | 1.35135 |
| Prephenate and/or arogenate dehydrogenase (unknown specificity) (EC 1.3.1.12)(EC 1.3.1.43) # NAD-specific                                                                                                                                                                                                                                                             | 57 | 2424620 | 2425483 | 364.4264195 | 696.118192 | 1.91017 |
| 2-keto-3-deoxy-D-arabino-heptulosonate-7-phosphate synthase I beta (EC 2.5.1.54)                                                                                                                                                                                                                                                                                      | 55 | 2425480 | 2426505 | 695.6097561 | 1200.73171 | 1.72616 |
| hypothetical protein                                                                                                                                                                                                                                                                                                                                                  | 54 | 2426618 | 2426740 | 45.08196721 | 0          | 0       |
| late embryogenesis abundant family protein / LEA family protein / similar to ethylene-responsive late embryogenesis-like protein [Lycopersicon esculentum] GI:1684830; contains Pfam profile PF03168: Late embryogenesis abundant protein; go_process: response to dessication [goid 0009269]; go_process: embryonic development (sensu Magnoliophyta) [goid 0009793] | 53 | 2426772 | 2428007 | 96.3562753  | 103.846154 | 1.07773 |
| Seryl-tRNA synthetase (EC 6.1.1.11)                                                                                                                                                                                                                                                                                                                                   | 52 | 2428016 | 2429308 | 218.6532508 | 195.04644  | 0.89204 |
| Isochorismatase (EC 3.3.2.1)                                                                                                                                                                                                                                                                                                                                          | 50 | 2429360 | 2429848 | 101.4344262 | 69.1598361 | 0.68182 |
| Biotin-protein ligase (EC 6.3.4.15) / Biotin operon repressor                                                                                                                                                                                                                                                                                                         | 51 | 2429845 | 2430624 | 50.06418485 | 17.3299101 | 0.34615 |
| Homoserine kinase (EC 2.7.1.39)                                                                                                                                                                                                                                                                                                                                       | 49 | 2430666 | 2431271 | 68.59504132 | 78.0991736 | 1.13855 |
| GTP-binding protein Era                                                                                                                                                                                                                                                                                                                                               | 48 | 2431272 | 2432195 | 64.46370531 | 56.0671723 | 0.86975 |
| Flagellar hook-length control protein fliK                                                                                                                                                                                                                                                                                                                            | 47 | 2432198 | 2437672 | 56.90537084 | 48.5020095 | 0.85233 |
| Flagellar hook-length control protein fliK                                                                                                                                                                                                                                                                                                                            |    | 2437629 | 2440109 | 517.5403226 | 430.947581 | 0.83268 |
| hypothetical protein                                                                                                                                                                                                                                                                                                                                                  | 45 | 2440951 | 2441088 | 14.59854015 | 49.270073  | 3.375   |
| hypothetical protein                                                                                                                                                                                                                                                                                                                                                  | 44 | 2441263 | 2441445 | 5.494505495 | 0          | 0       |
| hypothetical protein                                                                                                                                                                                                                                                                                                                                                  | 43 | 2441608 | 2441877 | 94.79553903 | 58.5501859 | 0.61765 |
| Plasmid stability protein                                                                                                                                                                                                                                                                                                                                             | 41 | 2441861 | 2442271 | 19.51219512 | 10.9756098 | 0.5625  |
| hypothetical protein                                                                                                                                                                                                                                                                                                                                                  | 42 | 2442253 | 2442384 | 11.45038168 | 0          | 0       |
| hypothetical protein                                                                                                                                                                                                                                                                                                                                                  | 40 | 2442367 | 2442840 | 19.02748414 | 4.75687104 | 0.25    |
| hypothetical protein                                                                                                                                                                                                                                                                                                                                                  | 39 | 2442846 | 2443055 | 47.84688995 | 21.5311005 | 0.45    |

|                                                                                            |    |         |         |             |            |         |
|--------------------------------------------------------------------------------------------|----|---------|---------|-------------|------------|---------|
| Serine acetyltransferase (EC 2.3.1.30)                                                     | 38 | 2443073 | 2443963 | 253.9325843 | 260.393258 | 1.02544 |
| (R)-2-hydroxyglutaryl-CoA dehydratase activator-related protein                            |    | 2443987 | 2444445 | 350.5494505 | 445.054945 | 1.26959 |
| (R)-2-hydroxyglutaryl-CoA dehydratase activator-related protein                            |    | 2444477 | 2448382 | 239.1749936 | 311.299001 | 1.30155 |
| Peroxide stress regulator PerR, FUR family                                                 | 35 | 2448619 | 2449032 | 46.00484262 | 70.8232446 | 1.53947 |
| Rubryerythrin                                                                              | 33 | 2449061 | 2449600 | 727.0168856 | 1025.79737 | 1.41097 |
| transcriptional regulator                                                                  | 34 | 2449597 | 2450559 | 97.19334719 | 154.365904 | 1.58824 |
| L-rhamnose mutarotase                                                                      | 32 | 2450614 | 2450931 | 26.81388013 | 7.0977918  | 0.26471 |
| Ribose ABC transport system, ATP-binding protein RbsA (TC 3.A.1.2.1)                       | 31 | 2450942 | 2452444 | 22.96937417 | 4.49400799 | 0.19565 |
| Ribose ABC transport system, permease protein RbsC (TC 3.A.1.2.1)                          | 30 | 2452453 | 2453397 | 16.41949153 | 0          | 0       |
| Ribose ABC transport system, permease protein RbsC (TC 3.A.1.2.1)                          | 29 | 2453390 | 2454388 | 20.04008016 | 4.50901804 | 0.225   |
| Predicted L-rhamnose ABC transporter, substrate-binding component                          | 28 | 2454433 | 2455506 | 75.02329916 | 27.2600186 | 0.36335 |
| hypothetical protein                                                                       | 27 | 2455524 | 2456618 | 24.68007313 | 10.2833638 | 0.41667 |
| hypothetical protein                                                                       | 26 | 2456715 | 2459564 | 26.32502633 | 26.0617761 | 0.99    |
| probable ATP /GTP binding protein                                                          | 25 | 2459537 | 2460847 | 48.47328244 | 46.3740458 | 0.95669 |
| ATP-dependent helicase                                                                     | 23 | 2460828 | 2463026 | 30.02729754 | 11.2602366 | 0.375   |
| N-acetylhexosamine 1-kinase                                                                | 24 | 2463023 | 2464153 | 66.37168142 | 57.7433628 | 0.87    |
| Alpha-L-fucosidase (EC 3.2.1.51)                                                           | 22 | 2464218 | 2465513 | 109.6525097 | 92.0849421 | 0.83979 |
| Oligopeptide ABC transporter, periplasmic oligopeptide-binding protein oppA (TC 3.A.1.5.1) | 21 | 2465558 | 2467372 | 116.4914222 | 158.13503  | 1.35748 |
| Oligopeptide transport system permease protein oppB (TC 3.A.1.5.1)                         | 20 | 2467381 | 2468478 | 57.88514129 | 65.633546  | 1.13386 |
| Peptide/opine/nickel uptake family ABC transporter, permease/ATP- binding protein          | 19 | 2468478 | 2470625 | 75.68700512 | 68.1183046 | 0.9     |
| Oligopeptide transport ATP-binding protein oppF (TC 3.A.1.5.1)                             | 18 | 2470622 | 2471629 | 42.20456802 | 44.6871897 | 1.05882 |
| putative ATP-dependent DNA helicase                                                        |    | 2471666 | 2475223 | 44.70059039 | 25.9347765 | 0.58019 |
| ATP-dependent helicase                                                                     |    | 2475244 | 2476116 | 26.37614679 | 5.16055046 | 0.19565 |
| Response regulator                                                                         | 15 | 2476166 | 2476786 | 71.77419355 | 36.2903226 | 0.50562 |
| Lipoprotein releasing system transmembrane protein LolC                                    | 14 | 2476788 | 2478050 | 41.99683043 | 17.8288431 | 0.42453 |
| Lipoprotein releasing system ATP-binding protein lolD                                      | 13 | 2478051 | 2478755 | 36.22159091 | 35.15625   | 0.97059 |
| Lipoprotein releasing system transmembrane protein LolC                                    | 12 | 2478748 | 2480088 | 27.23880597 | 21.8283582 | 0.80137 |
| hypothetical protein                                                                       | 11 | 2480085 | 2481242 | 63.52636128 | 68.0639585 | 1.07143 |
| Signal recognition particle receptor protein FtsY (=alpha subunit) (TC 3.A.5.1.1)          | 10 | 2481235 | 2482110 | 112         | 118.285714 | 1.05612 |
| PEGA domain protein                                                                        | 9  | 2482111 | 2483637 | 59.30537353 | 58.9777195 | 0.99448 |
| Peptide chain release factor 2; programmed frameshift-containing                           | 8  | 2483630 | 2484574 | 268.528464  | 319.011815 | 1.188   |
| hypothetical protein                                                                       | 7  | 2484742 | 2485059 | 282.3343849 | 255.520505 | 0.90503 |
| hypothetical protein                                                                       | 6  | 2485110 | 2486297 | 142.3757372 | 130.791912 | 0.91864 |
| hypothetical protein                                                                       | 5  | 2486483 | 2486743 | 73.52941176 | 77.2058824 | 1.05    |
| hypothetical protein                                                                       | 4  | 2486740 | 2487219 | 0           | 46.9728601 | #DIV/0! |
| hypothetical protein                                                                       | 3  | 2487783 | 2487905 | 8.196721311 | 0          | 0       |

|                                                                            |      |         |         |             |            |         |
|----------------------------------------------------------------------------|------|---------|---------|-------------|------------|---------|
| putative autotransporter protein                                           | 2    | 2487978 | 2491139 | 40.17715913 | 17.7950016 | 0.44291 |
| Probable hemagglutinin-related autotransporter protein                     | 1    | 2491142 | 2493544 | 54.12156536 | 29.0383014 | 0.53654 |
| hypothetical protein                                                       | 3666 | 2493800 | 2494207 | 104.4226044 | 44.2260442 | 0.42353 |
| hypothetical protein                                                       | 3665 | 2494204 | 2494446 | 179.7520661 | 269.628099 | 1.5     |
| TPR domain protein                                                         | 3664 | 2494585 | 2496585 | 93          | 104.625    | 1.125   |
| Magnesium and cobalt efflux protein corC                                   | 3663 | 2496585 | 2497370 | 78.98089172 | 91.7197452 | 1.16129 |
| predicted metal-dependent hydrolase                                        | 3662 | 2497367 | 2497822 | 52.74725275 | 69.2307692 | 1.3125  |
| Membrane protein containing HD superfamily hydrolase domain, YQFF ortholog | 3661 | 2497819 | 2500041 | 70.4320432  | 67.8442844 | 0.96326 |
| Phosphate starvation-inducible protein PhoH, predicted ATPase              | 3660 | 2500025 | 2500966 | 215.727949  | 236.716259 | 1.09729 |
| Organic solvent tolerance protein precursor                                | 3659 | 2501029 | 2504460 | 50.2768872  | 32.7892743 | 0.65217 |
| Excinuclease ABC subunit A                                                 | 3658 | 2504457 | 2507333 | 119.9582754 | 129.085535 | 1.07609 |
| Iron-sulfur flavoprotein                                                   | 3657 | 2507368 | 2508024 | 123.4756098 | 157.77439  | 1.27778 |
| Methyl-accepting chemotaxis protein                                        | 3656 | 2508027 | 2510129 | 118.9343482 | 131.660324 | 1.107   |
| Transcriptional regulator                                                  |      | 2510259 | 2511311 | 44.20152091 | 36.3593156 | 0.82258 |
| Alcohol dehydrogenase (EC 1.1.1.1)                                         | 3654 | 2511549 | 2512847 | 63.55932203 | 55.4699538 | 0.87273 |
| Glyoxylate carboligase (EC 4.1.1.47)                                       | 3653 | 2512865 | 2514526 | 31.90848886 | 21.6736905 | 0.67925 |
| N-Acetyl-D-glucosamine ABC transport system, permease protein 2            | 3652 | 2514703 | 2515539 | 11.96172249 | 0          | 0       |
| N-Acetyl-D-glucosamine ABC transport system, permease protein 1            | 3651 | 2515543 | 2516493 | 15.78947368 | 2.36842105 | 0.15    |
| N-Acetyl-D-glucosamine ABC transport system, sugar-binding protein         | 3650 | 2516595 | 2517977 | 30.39073806 | 35.8176556 | 1.17857 |
| Invasion protein IbeA                                                      | 3649 | 2518058 | 2519398 | 39.55223881 | 38.619403  | 0.97642 |
| Invasion protein IbeA                                                      | 3648 | 2519660 | 2520991 | 23.29075883 | 6.76183321 | 0.29032 |
| Invasion protein IbeA                                                      | 3647 | 2521033 | 2522370 | 18.32460733 | 6.73148841 | 0.36735 |
| Sorbitol dehydrogenase (EC 1.1.1.14) oxidoreductase, short-chain           | 3646 | 2522817 | 2523893 | 22.76951673 | 18.8197026 | 0.82653 |
| dehydrogenase/reductase family                                             | 3645 | 2523908 | 2524675 | 29.98696219 | 17.601043  | 0.58696 |
| Dihydroxyacetone kinase, ATP-dependent (EC 2.7.1.29)                       | 3644 | 2524685 | 2525680 | 29.64824121 | 9.04522613 | 0.30508 |
| Putative dihydroxyacetone kinase (EC 2.7.1.29), ADP-binding subunit        | 3643 | 2525698 | 2526333 | 30.70866142 | 17.7165354 | 0.57692 |
| Ribose 5-phosphate isomerase B (EC 5.3.1.6)                                | 3642 | 2526347 | 2526805 | 38.20960699 | 0          | 0       |
| hypothetical protein                                                       |      | 2526843 | 2527046 | 7.389162562 | 0          | 0       |
| hypothetical protein                                                       | 3640 | 2527151 | 2527294 | 6.993006993 | 0          | 0       |
| Transposase subunit                                                        | 3639 | 2527456 | 2527806 | 41.42857143 | 6.42857143 | 0.15517 |
| type III effector Hrp-dependent outer                                      | 3638 | 2528228 | 2528821 | 29.51096121 | 0          | 0       |
| Anthranilate phosphoribosyltransferase (EC 2.4.2.18)                       | 3637 | 2528829 | 2530073 | 33.76205788 | 5.42604502 | 0.16071 |
| 4-hydroxythreonine-4-phosphate dehydrogenase (EC 1.1.1.262)                | 3636 | 2530067 | 2531128 | 13.19509896 | 0          | 0       |
| Transcriptional regulator, IclR family                                     | 3634 | 2531140 | 2531940 | 77.5        | 75.9375    | 0.97984 |
| 1-acyl-sn-glycerol-3-phosphate acyltransferase (EC 2.3.1.51)               | 3635 | 2531937 | 2532686 | 46.06141522 | 39.0520694 | 0.84783 |
| Acyl-CoA dehydrogenase (EC 1.3.99.3)                                       | 3633 | 2532696 | 2533310 | 97.71986971 | 76.9543974 | 0.7875  |
| Transcription-repair coupling factor                                       | 3632 | 2533397 | 2536822 | 83.55243938 | 78.878177  | 0.94406 |
| hypothetical protein                                                       | 3631 | 2536883 | 2537866 | 293.4893184 | 256.358087 | 0.87348 |
| Uncharacterized protein TP_0454                                            | 3630 | 2537875 | 2538648 | 226.3906856 | 148.447607 | 0.65571 |
| hypothetical protein                                                       | 3629 | 2538691 | 2538846 | 16.12903226 | 0          | 0       |



|                                                                         |      |         |         |             |            |         |
|-------------------------------------------------------------------------|------|---------|---------|-------------|------------|---------|
| transcriptional regulator, PadR family                                  | 3628 | 2538845 | 2539192 | 30.25936599 | 19.4524496 | 0.64286 |
| CDS_ID OB0393                                                           |      | 2539420 | 2540007 | 30.66439523 | 34.4974446 | 1.125   |
| Phosphomethylpyrimidine kinase (EC 2.7.4.7)                             | 3626 | 2540111 | 2540911 | 126.25      | 104.0625   | 0.82426 |
| Alkaline phosphatase like protein                                       | 3625 | 2540908 | 2541609 | 42.79600571 | 25.6776034 | 0.6     |
| Putative deoxyribonuclease YcfH                                         | 3624 | 2541602 | 2542402 | 47.5        | 47.8125    | 1.00658 |
| DNA integration/recombination/inversion protein                         | 3623 | 2542402 | 2542962 | 57.14285714 | 32.1428571 | 0.5625  |
| hypothetical protein                                                    | 3622 | 2543135 | 2543551 | 439.9038462 | 481.370192 | 1.09426 |
| Asparaginyl-tRNA synthetase (EC 6.1.1.22)                               | 3621 | 2543557 | 2545002 | 132.0361362 | 140.722724 | 1.06579 |
| D-alanyl-D-alanine carboxypeptidase (EC 3.4.16.4)                       | 3620 | 2545008 | 2546234 | 69.73898858 | 53.2218597 | 0.76316 |
| Polysaccharide deacetylase precursor                                    | 3619 | 2546292 | 2548541 | 73.14361939 | 45.0200089 | 0.6155  |
| hypothetical protein                                                    | 3618 | 2548525 | 2548728 | 307.8817734 | 243.842365 | 0.792   |
| hypothetical protein                                                    | 3617 | 2548725 | 2548850 | 180         | 216        | 1.2     |
| Membrane proteins related to metalloendopeptidases                      | 3616 | 2548888 | 2550162 | 253.5321821 | 233.124019 | 0.9195  |
| Signal peptidase I (EC 3.4.21.89)                                       | 3615 | 2550239 | 2550613 | 76.20320856 | 84.2245989 | 1.10526 |
| Cell division protein ftsI [Peptidoglycan synthetase] (EC 2.4.1.129)    | 3614 | 2550610 | 2552478 | 185.4925054 | 168.62955  | 0.90909 |
| hypothetical protein                                                    | 3613 | 2552493 | 2553551 | 146.5028355 | 204.15879  | 1.39355 |
| Multiple sugar ABC transporter, membrane-spanning permease protein MsmG | 3612 | 2553576 | 2554415 | 66.74612634 | 37.5446961 | 0.5625  |
| N-Acetyl-D-glucosamine ABC transport system, permease protein 1         | 3611 | 2554425 | 2555291 | 80.25404157 | 62.3556582 | 0.77698 |
| Multiple sugar ABC transporter, substrate-binding protein               | 3610 | 2555377 | 2556774 | 253.758053  | 227.093772 | 0.89492 |
| Conserved domain protein                                                | 3609 | 2556808 | 2558730 | 79.0842872  | 87.7991675 | 1.1102  |
| Aspartate aminotransferase (EC 2.6.1.1)                                 | 3608 | 2558867 | 2560084 | 127.3623665 | 134.963024 | 1.05968 |
| Uncharacterized protein TP_0763                                         | 3607 | 2560099 | 2560920 | 129.7198538 | 139.768575 | 1.07746 |
| HD domain protein                                                       | 3606 | 2560966 | 2562180 | 217.0510708 | 224.258649 | 1.03321 |
| Hemolysins and related proteins containing CBS domains                  | 3605 | 2562191 | 2563519 | 55.80693816 | 44.1176471 | 0.79054 |
| ATP-dependent RNA helicase YfmL                                         | 3604 | 2563552 | 2564787 | 85.82995951 | 61.9433198 | 0.7217  |
| Glycosyltransferase                                                     | 3603 | 2564777 | 2566135 | 130.7069219 | 107.69514  | 0.82394 |
| Sodium/proline symporter                                                | 3602 | 2566218 | 2567684 | 173.2876712 | 211.130137 | 1.21838 |
| Glutathione peroxidase (EC 1.11.1.9)                                    | 3601 | 2567697 | 2568176 | 76.20041754 | 84.5511482 | 1.10959 |
| hypothetical protein                                                    | 3600 | 2568234 | 2568371 | 105.8394161 | 65.6934307 | 0.62069 |
| hypothetical protein                                                    | 3599 | 2568557 | 2572069 | 30.46697039 | 22.4231207 | 0.73598 |
| similar to TPR repeat-containing protein                                | 3598 | 2572128 | 2572391 | 17.11026616 | 17.1102662 | 1       |
| Indolepyruvate oxidoreductase, subunit A                                | 3597 | 2572601 | 2574298 | 217.7895981 | 202.12766  | 0.92809 |
| Pyruvate kinase (EC 2.7.1.40)                                           | 3596 | 2574295 | 2576130 | 182.5613079 | 147.138965 | 0.80597 |
| Indolepyruvate oxidoreductase, subunit B                                | 3595 | 2576157 | 2576729 | 78.67132867 | 59.0034965 | 0.75    |
| Phenylacetate-coenzyme A ligase (EC 6.2.1.30)                           | 3594 | 2576726 | 2578039 | 169.2073171 | 180.068598 | 1.06419 |
| hypothetical protein                                                    | 3593 | 2578064 | 2578654 | 51.69491525 | 34.3220339 | 0.66393 |
| Mlr3463 protein                                                         | 3592 | 2578651 | 2580054 | 57.37704918 | 27.2630078 | 0.47516 |
| Cell surface protein                                                    | 3591 | 2580069 | 2583068 | 52.01733911 | 16.5055018 | 0.31731 |
| hypothetical protein                                                    | 3590 | 2583088 | 2585025 | 57.56324213 | 40.6556531 | 0.70628 |
| hypothetical protein                                                    | 3589 | 2585136 | 2586533 | 37.2226199  | 17.7165354 | 0.47596 |
| Phenylacetate-coenzyme A ligase (EC 6.2.1.30)                           | 3588 | 2586661 | 2587962 | 304.0958269 | 403.400309 | 1.32656 |
| Amino acid-binding ACT                                                  | 3587 | 2588045 | 2588461 | 152.6442308 | 194.711538 | 1.27559 |

|                                                                                            |      |         |         |             |            |         |
|--------------------------------------------------------------------------------------------|------|---------|---------|-------------|------------|---------|
| Glycogen synthase, ADP-glucose transglucosylase (EC 2.4.1.21)                              | 3586 | 2588415 | 2589950 | 220.8469055 | 222.801303 | 1.00885 |
| UDP-sugar hydrolase (EC 3.6.1.45); 5'-nucleotidase (EC 3.1.3.5)                            | 3585 | 2589955 | 2591508 | 167.961165  | 103.398058 | 0.61561 |
| Transcriptional regulator                                                                  | 3584 | 2591561 | 2592046 | 20.6185567  | 0          | 0       |
| Iron-sulfur cluster-binding protein                                                        | 3583 | 2592088 | 2593200 | 32.82374101 | 14.1636691 | 0.43151 |
| Methyl-accepting chemotaxis sensory transducer precursor                                   | 3582 | 2593320 | 2595083 | 130.7430516 | 100.822462 | 0.77115 |
| Signal transduction histidine kinase                                                       | 3581 | 2595121 | 2597820 | 62.4768261  | 35.0389321 | 0.56083 |
| Transcription regulator [contains diacylglycerol kinase catalytic domain]                  | 3580 | 2597813 | 2598808 | 51.75879397 | 38.4422111 | 0.74272 |
| Circadian input kinase A / Phytochrome-like protein                                        | 3579 | 2598870 | 2600096 | 81.56606852 | 108.278956 | 1.3275  |
| sensory box histidine kinase/response regulator                                            | 3578 | 2600109 | 2602037 | 60.6846473  | 63.0186722 | 1.03846 |
| sensory box histidine kinase/response regulator hypothetical protein                       | 3577 | 2602052 | 2605270 | 52.05096333 | 56.6345556 | 1.08806 |
| Sugar phosphate isomerases/epimerases                                                      | 3576 | 2605298 | 2606458 | 121.1206897 | 172.62931  | 1.42527 |
| Flavodoxin                                                                                 | 3574 | 2606710 | 2607531 | 516.4433618 | 701.583435 | 1.35849 |
| Peptidase U32                                                                              | 3573 | 2607696 | 2608184 | 145.4918033 | 147.540984 | 1.01408 |
| Protein RtcB                                                                               | 3572 | 2608186 | 2609385 | 58.38198499 | 54.4203503 | 0.93214 |
| Peptide chain release factor homolog                                                       | 3571 | 2609407 | 2610603 | 22.57525084 | 15.0501672 | 0.66667 |
| Virulence associated protein                                                               | 3570 | 2610593 | 2611369 | 40.59278351 | 31.8943299 | 0.78571 |
| Purine nucleoside phosphorylase (EC 2.4.2.1)                                               | 3569 | 2611672 | 2611830 | 37.97468354 | 0          | 0       |
| Ribose ABC transport system, permease protein RbsC (TC 3.A.1.2.1)                          | 3567 | 2612398 | 2613144 | 35.5227882  | 33.1769437 | 0.93396 |
| Ribose ABC transport system, permease protein RbsC (TC 3.A.1.2.1)                          | 3566 | 2613175 | 2614089 | 41.02844639 | 29.5404814 | 0.72    |
| ABC transporter, ATP-binding protein                                                       | 3565 | 2614082 | 2615227 | 34.06113537 | 13.7554585 | 0.40385 |
| Oligopeptide ABC transporter, periplasmic oligopeptide-binding protein oppA (TC 3.A.1.5.1) | 3564 | 2615220 | 2616740 | 111.1842105 | 90.2960526 | 0.81213 |
| Oligopeptide transport system permease protein oppB (TC 3.A.1.5.1)                         | 3563 | 2616875 | 2618476 | 710.1811368 | 713.928795 | 1.00528 |
| Oligopeptide transport system permease protein oppC (TC 3.A.1.5.1)                         | 3562 | 2618498 | 2619427 | 94.18729817 | 84.7685684 | 0.9     |
| Oligopeptide transport ATP-binding protein oppD (TC 3.A.1.5.1)                             | 3561 | 2619440 | 2620510 | 43.45794393 | 23.1308411 | 0.53226 |
| Oligopeptide transport ATP-binding protein oppF (TC 3.A.1.5.1)                             | 3560 | 2620519 | 2621523 | 100.5976096 | 53.7848606 | 0.53465 |
| hypothetical protein                                                                       | 3559 | 2621520 | 2622524 | 74.20318725 | 80.6772908 | 1.08725 |
| lipoprotein, Bmp family                                                                    | 3558 | 2622529 | 2622897 | 248.6413043 | 238.451087 | 0.95902 |
| hypothetical protein                                                                       | 3557 | 2622924 | 2624072 | 641.1149826 | 664.416376 | 1.03635 |
| OmpA family protein                                                                        | 3556 | 2624002 | 2624172 | 5.882352941 | 0          | 0       |
| hypothetical protein                                                                       | 3555 | 2624246 | 2628319 | 440.4615762 | 560.70464  | 1.27299 |
| Bsr0038 protein                                                                            | 3554 | 2628442 | 2629203 | 84.09986859 | 68.0026281 | 0.80859 |
| S-layer protein                                                                            | 3553 | 2629314 | 2629703 | 56.55526992 | 34.7043702 | 0.61364 |
| Methionine ABC transporter ATP-binding protein                                             | 3552 | 2629707 | 2631314 | 94.58618544 | 82.6073429 | 0.87336 |
| Methionine ABC transporter permease protein                                                | 3551 | 2631508 | 2632296 | 29.82233503 | 8.56598985 | 0.28723 |
|                                                                                            | 3550 | 2632293 | 2632982 | 44.99274311 | 3.26560232 | 0.07258 |

|                                                                                           |      |         |         |             |            |         |
|-------------------------------------------------------------------------------------------|------|---------|---------|-------------|------------|---------|
| Methionine ABC transporter substrate-binding protein                                      | 3549 | 2633029 | 2633862 | 36.61464586 | 5.40216086 | 0.14754 |
| DNA repair protein RadC                                                                   | 3548 | 2633912 | 2634604 | 33.23699422 | 13.0057803 | 0.3913  |
| Alfa-L-rhamnosidase (EC 3.2.1.40)                                                         | 3547 | 2634698 | 2637346 | 223.3761329 | 229.418429 | 1.02705 |
| hypothetical protein                                                                      | 3545 | 2637363 | 2638052 | 92.88824383 | 39.1872279 | 0.42188 |
| hypothetical protein                                                                      | 3546 | 2638049 | 2639314 | 48.22134387 | 24.9011858 | 0.51639 |
| hypothetical protein                                                                      | 3544 | 2639365 | 2640387 | 219.1780822 | 158.51272  | 0.72321 |
| TPR domain protein, putative component of TonB system                                     | 3543 | 2640399 | 2641565 | 179.6740995 | 189.108062 | 1.05251 |
| ortholog to <i>Borrelia burgdorferi</i> BB0097                                            | 3542 | 2641591 | 2641989 | 165.8291457 | 209.170854 | 1.26136 |
| ATP-dependent protease La (EC 3.4.21.53) Type I                                           | 3541 | 2641996 | 2644374 | 417.442845  | 575.359865 | 1.3783  |
| AAA+ superfamily protein                                                                  | 3540 | 2644584 | 2645795 | 25.18579686 | 9.2898431  | 0.36885 |
| NimC/NimA family protein                                                                  | 3539 | 2645857 | 2646252 | 115.1898734 | 131.012658 | 1.13736 |
| Cysteine synthase (EC 2.5.1.47)                                                           | 3538 | 2646421 | 2647341 | 1936.413043 | 481.793478 | 0.24881 |
| Outer membrane protein                                                                    | 3537 | 2647346 | 2649511 | 143.187067  | 75.8660508 | 0.52984 |
| FeMo cofactor biosynthesis protein NifB                                                   | 3536 | 2649584 | 2649946 | 143.6464088 | 136.740331 | 0.95192 |
| Glycosyl hydrolase, family 5                                                              | 3535 | 2649956 | 2651314 | 258.1001473 | 336.340206 | 1.30314 |
| hypothetical protein                                                                      | 3534 | 2651317 | 2651751 | 781.1059908 | 1000.57604 | 1.28097 |
| hypothetical protein                                                                      | 3533 | 2652021 | 2652671 | 107.6923077 | 138.461538 | 1.28571 |
| hypothetical protein                                                                      | 3532 | 2652694 | 2653125 | 77.7262181  | 57.424594  | 0.73881 |
| hypothetical protein                                                                      | 3531 | 2653225 | 2654172 | 118.2682154 | 130.675818 | 1.10491 |
| Peptidase M18, aminopeptidase I:Peptidase M20                                             | 3528 | 2654731 | 2656152 | 201.9704433 | 196.340605 | 0.97213 |
| Dipeptide-binding ABC transporter, periplasmic substrate-binding component (TC 3.A.1.5.2) | 3527 | 2656166 | 2657773 | 387.0566273 | 418.637212 | 1.08159 |
| Oligopeptide transport ATP-binding protein oppF (TC 3.A.1.5.1)                            | 3526 | 2657812 | 2658747 | 97.32620321 | 69.7860963 | 0.71703 |
| Oligopeptide transport ATP-binding protein oppD (TC 3.A.1.5.1)                            | 3525 | 2658744 | 2659706 | 180.7291667 | 131.25     | 0.72622 |
| Oligopeptide ABC transporter, permease                                                    | 3524 | 2659703 | 2660641 | 91.68443497 | 95.9488273 | 1.04651 |
| Putative glutathione transporter, permease component                                      | 3523 | 2660645 | 2661604 | 123.5662148 | 166.579771 | 1.3481  |
| Citrate synthase (si) (EC 2.3.3.1)                                                        | 3522 | 2661626 | 2662984 | 91.67893962 | 77.8718704 | 0.8494  |
| Carbon starvation protein A                                                               | 3521 | 2663091 | 2664788 | 91.33765468 | 74.2486741 | 0.8129  |
| sensory box histidine kinase/response regulator                                           | 3520 | 2664815 | 2666596 | 161.8725324 | 171.319797 | 1.05836 |
| hypothetical protein                                                                      | 3519 | 2666617 | 2666793 | 28.40909091 | 38.3522727 | 1.35    |
| hypothetical protein                                                                      | 3518 | 2666790 | 2666990 | 55          | 101.25     | 1.84091 |
| Methyl-accepting chemotaxis protein                                                       | 3517 | 2667186 | 2667668 | 1380.705394 | 1638.48548 | 1.1867  |
| Cell surface protein                                                                      | 3516 | 2668308 | 2669912 | 441.084788  | 506.390274 | 1.14806 |
| hypothetical protein                                                                      | 3515 | 2670012 | 2670131 | 210.0840336 | 226.890756 | 1.08    |
| hypothetical protein                                                                      | 3514 | 2670183 | 2670407 | 73.66071429 | 20.0892857 | 0.27273 |
| hypothetical protein                                                                      | 3513 | 2670463 | 2671995 | 359.9869452 | 625.652742 | 1.73799 |
| Uncharacterized protein TP_0930                                                           | 3512 | 2672009 | 2673658 | 58.82352941 | 105.063675 | 1.78608 |
| ATP synthase delta chain (EC 3.6.3.14)                                                    | 3511 | 2673678 | 2674361 | 232.7964861 | 233.894583 | 1.00472 |
| Translation elongation factor LepA                                                        | 3510 | 2674362 | 2676176 | 224.0802676 | 334.866221 | 1.4944  |
| Flagellar biosynthesis protein flhA                                                       | 3509 | 2676179 | 2677507 | 304.2168675 | 398.15512  | 1.30879 |
| Serine protease precursor MucD/AlgY associated with sigma factor RpoE                     | 3508 | 2677520 | 2679364 | 220.9869848 | 491.729935 | 2.22515 |
| Uncharacterized protein TP_0374                                                           | 3507 | 2679377 | 2681053 | 391.1097852 | 861.873508 | 2.20366 |
| Cell division protein ftsH (EC 3.4.24.-)                                                  | 3506 | 2681055 | 2682944 | 305.9820011 | 440.70937  | 1.44031 |

|                                                                                                              |      |         |         |             |            |         |
|--------------------------------------------------------------------------------------------------------------|------|---------|---------|-------------|------------|---------|
| tRNA(Ile)-lysidine synthetase                                                                                | 3505 | 2682922 | 2684256 | 97.45127436 | 139.992504 | 1.43654 |
| LSU ribosomal protein L25p                                                                                   | 3504 | 2684556 | 2685251 | 870.5035971 | 1430.93525 | 1.6438  |
| SpoVG family protein                                                                                         | 3502 | 2685432 | 2685713 | 60.49822064 | 112.099644 | 1.85294 |
| 4-diphosphocytidyl-2-C-methyl-D-erythritol kinase (EC 2.7.1.148)                                             | 3501 | 2685748 | 2686683 | 88.23529412 | 86.631016  | 0.98182 |
| hypothetical protein                                                                                         | 3499 | 2686807 | 2687112 | 667.2131148 | 826.229508 | 1.23833 |
| COG0799: Uncharacterized homolog of plant lojap protein                                                      | 3500 | 2687070 | 2687429 | 215.8774373 | 225.626741 | 1.04516 |
| Transcriptional regulator                                                                                    | 3498 | 2687434 | 2688648 | 41.59802306 | 51.8945634 | 1.24752 |
| Nicotinate-nucleotide adenyltransferase (EC 2.7.7.18) / Hydrolase (HAD superfamily), yqeK # fusion with NadD | 3497 | 2688645 | 2689847 | 77.78702163 | 99.2096506 | 1.2754  |
| COG0536: GTP-binding protein Obg                                                                             | 3496 | 2689844 | 2690839 | 120.6030151 | 174.120603 | 1.44375 |
| LSU ribosomal protein L27p                                                                                   | 3495 | 2690854 | 2691111 | 649.8054475 | 1006.80934 | 1.5494  |
| hypothetical protein                                                                                         | 3494 | 2691113 | 2691442 | 411.8541033 | 594.984802 | 1.44465 |
| LSU ribosomal protein L21p                                                                                   | 3493 | 2691442 | 2691765 | 498.4520124 | 912.5387   | 1.83075 |
| oxidoreductase, aldo/keto reductase family                                                                   | 3492 | 2691848 | 2692822 | 175.5646817 | 247.176591 | 1.40789 |
| hypothetical protein                                                                                         | 3491 | 2692845 | 2694002 | 30.68280035 | 11.6681072 | 0.38028 |
| Trimethylamine corrinoid protein 2                                                                           | 3490 | 2694053 | 2695102 | 37.65490944 | 23.593899  | 0.62658 |
| hypothetical protein                                                                                         | 3489 | 2695183 | 2696439 | 33.43949045 | 17.9140127 | 0.53571 |
| Alpha-galactosidase (EC 3.2.1.22)                                                                            | 3488 | 2696443 | 2697786 | 77.06626955 | 58.637379  | 0.76087 |
| hypothetical protein                                                                                         | 3487 | 2697810 | 2698187 | 35.80901857 | 5.96816976 | 0.16667 |
| Oligopeptide transport ATP-binding protein oppF (TC 3.A.1.5.1)                                               | 3486 | 2698189 | 2699193 | 31.37450199 | 35.8565737 | 1.14286 |
| Possible rhamnose ABC transporter, permease component 2                                                      | 3485 | 2699203 | 2700297 | 35.19195612 | 14.3967093 | 0.40909 |
| ABC transporter, permease protein                                                                            | 3484 | 2700310 | 2701308 | 44.58917836 | 15.7815631 | 0.35393 |
| ABC transporter, periplasmic alpha-galactoside binding protein                                               | 3483 | 2701378 | 2703477 | 116.9604574 | 100.762268 | 0.86151 |
| Oligopeptide transport ATP-binding protein oppD (TC 3.A.1.5.1)                                               | 3482 | 2703522 | 2704517 | 34.17085427 | 47.4874372 | 1.38971 |
| Transcriptional regulator, AraC/XylS family                                                                  | 3481 | 2704646 | 2705530 | 93.89140271 | 124.717195 | 1.32831 |
| Arginyl-tRNA synthetase (EC 6.1.1.19)                                                                        | 3480 | 2705533 | 2707296 | 151.0238908 | 152.303754 | 1.00847 |
| COG1496: Uncharacterized conserved protein                                                                   | 3479 | 2707342 | 2708136 | 71.15869018 | 48.1738035 | 0.67699 |
| Uncharacterized protein TP_0110                                                                              | 3478 | 2708136 | 2709842 | 58.90973036 | 44.8417351 | 0.76119 |
| hypothetical protein                                                                                         | 3477 | 2709948 | 2710214 | 45.11278195 | 67.6691729 | 1.5     |
| hypothetical protein                                                                                         | 3476 | 2710216 | 2710455 | 23.0125523  | 28.2426778 | 1.22727 |
| hypothetical protein                                                                                         | 3475 | 2710452 | 2710673 | 36.19909502 | 0          | 0       |
| hypothetical protein                                                                                         | 3474 | 2710831 | 2710944 | 39.82300885 | 59.7345133 | 1.5     |
| Outer membrane autotransporter barrel                                                                        | 3471 | 2711398 | 2712405 | 75.47169811 | 35.7497517 | 0.47368 |
| Transcriptional regulator, MerR family                                                                       | 3470 | 2712531 | 2712857 | 35.27607362 | 0          | 0       |
| Glycosyltransferase                                                                                          | 3469 | 2713049 | 2715379 | 35.19313305 | 21.2446352 | 0.60366 |
| hypothetical protein                                                                                         | 3468 | 2715376 | 2716677 | 90.69946195 | 83.0130669 | 0.91525 |
| Oxidoreductase, short chain dehydrogenase/reductase family                                                   | 3467 | 2716684 | 2717451 | 357.8878748 | 378.422425 | 1.05738 |
| Adenine phosphoribosyltransferase (EC 2.4.2.7)                                                               | 3466 | 2717473 | 2718003 | 436.7924528 | 513.679245 | 1.17603 |
| hypothetical protein                                                                                         | 3465 | 2718021 | 2718425 | 194.3069307 | 178.217822 | 0.9172  |
| Translation initiation factor 1                                                                              | 3463 | 2718500 | 2718724 | 140.625     | 251.116071 | 1.78571 |
| Recombination inhibitory protein MutS2                                                                       | 3464 | 2718721 | 2719116 | 315.1898734 | 751.898734 | 2.38554 |
| hypothetical protein                                                                                         | 3462 | 2719128 | 2720651 | 176.2967827 | 317.629678 | 1.80168 |
| BatB                                                                                                         | 3461 | 2720663 | 2722306 | 58.73402313 | 53.4083993 | 0.90933 |

|                                                                                                                                                                                |      |         |         |             |            |         |
|--------------------------------------------------------------------------------------------------------------------------------------------------------------------------------|------|---------|---------|-------------|------------|---------|
| BatA (Bacteroides aerotolerance operon)                                                                                                                                        | 3460 | 2722303 | 2723304 | 41.95804196 | 33.7162837 | 0.80357 |
| hypothetical protein                                                                                                                                                           | 3459 | 2723301 | 2724239 | 66.09808102 | 59.9680171 | 0.90726 |
| hypothetical protein PA3071                                                                                                                                                    | 3458 | 2724236 | 2725111 | 65.14285714 | 84.8571429 | 1.30263 |
| MoxR-like ATPase in aerotolerance operon                                                                                                                                       | 3457 | 2725122 | 2726162 | 127.3080661 | 166.180758 | 1.30534 |
| Aspartate aminotransferase (EC 2.6.1.1)                                                                                                                                        | 3456 | 2726249 | 2727571 | 140.3177005 | 142.965204 | 1.01887 |
| hypothetical protein                                                                                                                                                           | 3455 | 2727581 | 2728027 | 400.2242152 | 403.587444 | 1.0084  |
| lipoprotein, putative                                                                                                                                                          | 3454 | 2728135 | 2729397 | 145.800317  | 128.36767  | 0.88043 |
| hypothetical protein                                                                                                                                                           | 3453 | 2729463 | 2729894 | 78.8863109  | 93.9675174 | 1.19118 |
| 6-phosphofructokinase (EC 2.7.1.11)                                                                                                                                            | 3452 | 2730120 | 2731226 | 176.7631103 | 71.2025316 | 0.40281 |
| hypothetical protein                                                                                                                                                           | 3451 | 2731318 | 2731485 | 26.94610778 | 26.9461078 | 1       |
| Conserved domain protein                                                                                                                                                       |      | 2731556 | 2733466 | 112.565445  | 89.5287958 | 0.79535 |
| Alanyl-tRNA synthetase (EC 6.1.1.7)                                                                                                                                            | 3449 | 2733518 | 2735335 | 316.8975069 | 366.481994 | 1.15647 |
| Peptidyl-prolyl cis-trans isomerase ppiD (EC 5.2.1.8)                                                                                                                          | 3448 | 2735423 | 2736463 | 548.0769231 | 1109.85577 | 2.025   |
| Transcription termination protein NusB                                                                                                                                         | 3447 | 2736466 | 2736933 | 240.8993576 | 534.796574 | 2.22    |
| hypothetical protein                                                                                                                                                           | 3446 | 2736953 | 2738689 | 159.2741935 | 221.630184 | 1.3915  |
| Heat shock protein 60 family co-chaperone GroES                                                                                                                                | 3445 | 2738750 | 2739016 | 5650.37594  | 8281.01504 | 1.46557 |
| hypothetical protein                                                                                                                                                           | 3444 | 2739039 | 2739155 | 0           | 0          | #DIV/0! |
| hypothetical protein                                                                                                                                                           | 3443 | 2739294 | 2739407 | 17.69911504 | 0          | 0       |
| RNA polymerase sigma factor RpoD                                                                                                                                               | 3441 | 2739440 | 2740318 | 950.4555809 | 1376.13895 | 1.44787 |
| Predicted rhamnulose-1-phosphate aldolase (EC 4.1.2.19) / Predicted lactaldehyde dehydrogenase (EC 1.2.1.22)                                                                   | 3442 | 2740315 | 2741454 | 281.3871817 | 369.402985 | 1.31279 |
| Galactitol utilization operon repressor                                                                                                                                        | 3440 | 2741590 | 2742381 | 67.00379267 | 62.5790139 | 0.93396 |
| Dihydrolipoamide acetyltransferase component (E2) of acetoin dehydrogenase complex (EC 2.3.1.-)                                                                                | 3439 | 2742398 | 2743810 | 114.3767705 | 159.348442 | 1.39319 |
| Dihydrolipoamide dehydrogenase of acetoin dehydrogenase (EC 1.8.1.4)                                                                                                           | 3438 | 2743828 | 2745195 | 76.81053402 | 67.4835406 | 0.87857 |
| Branched-chain alpha-keto acid dehydrogenase, E1 component, alpha subunit (EC 1.2.4.4) / Branched-chain alpha-keto acid dehydrogenase, E1 component, beta subunit (EC 1.2.4.4) | 3437 | 2745233 | 2747692 | 82.55388369 | 107.055714 | 1.2968  |
| hypothetical protein                                                                                                                                                           | 3436 | 2747689 | 2748975 | 59.48678072 | 62.9860031 | 1.05882 |
| Sorbitol-6-phosphate 2-dehydrogenase (EC 1.1.1.140)                                                                                                                            | 3435 | 2749095 | 2750306 | 42.52683732 | 50.1651528 | 1.17961 |
| Putative oxidoreductase                                                                                                                                                        | 3434 | 2750331 | 2751608 | 130.7752545 | 140.955364 | 1.07784 |
| hypothetical protein                                                                                                                                                           |      | 2751730 | 2751873 | 27.97202797 | 78.6713287 | 2.8125  |
| Methylated-DNA--protein-cysteine methyltransferase (EC 2.1.1.63)                                                                                                               | 3432 | 2752101 | 2752568 | 16.05995717 | 0          | 0       |
| ADA regulatory protein                                                                                                                                                         | 3431 | 2752619 | 2753179 | 25          | 4.01785714 | 0.16071 |
| Na <sup>+</sup> driven multidrug efflux pump                                                                                                                                   | 3430 | 2753524 | 2755065 | 42.8293316  | 8.7605451  | 0.20455 |
| hypothetical protein                                                                                                                                                           | 3428 | 2755102 | 2755335 | 113.7339056 | 57.9399142 | 0.50943 |
| hypothetical protein                                                                                                                                                           | 3429 | 2755325 | 2755441 | 4.310344828 | 0          | 0       |
| N-acetylglutamate synthase (EC 2.3.1.1)                                                                                                                                        | 3427 | 2755394 | 2756716 | 149.0166415 | 136.157337 | 0.91371 |
| Exodeoxyribonuclease VII large subunit (EC 3.1.11.6)                                                                                                                           | 3426 | 2756752 | 2757984 | 112.4188312 | 85.836039  | 0.76354 |
| Exodeoxyribonuclease VII small subunit (EC 3.1.11.6)                                                                                                                           | 3425 | 2757992 | 2758255 | 110.2661597 | 94.1064639 | 0.85345 |
| DNA mismatch repair protein MutL                                                                                                                                               | 3424 | 2758252 | 2759988 | 90.72580645 | 60.9158986 | 0.67143 |



|                                                                                                                                                                                   |      |         |         |             |            |         |
|-----------------------------------------------------------------------------------------------------------------------------------------------------------------------------------|------|---------|---------|-------------|------------|---------|
| putative oxidoreductase                                                                                                                                                           | 3423 | 2760039 | 2761028 | 85.94539939 | 50.0505561 | 0.58235 |
| hypothetical protein                                                                                                                                                              | 3422 | 2761128 | 2763761 | 62.47626282 | 58.1086213 | 0.93009 |
| hypothetical protein                                                                                                                                                              | 3420 | 2763773 | 2764906 | 301.8534863 | 754.633716 | 2.5     |
| HtrA protease/chaperone protein                                                                                                                                                   | 3421 | 2764903 | 2766411 | 1613.72679  | 5425.06631 | 3.36182 |
| Methionine aminopeptidase (EC 3.4.11.18)                                                                                                                                          | 3419 | 2766505 | 2767257 | 81.78191489 | 92.7526596 | 1.13415 |
| Chaperone protein DnaJ                                                                                                                                                            | 3418 | 2767244 | 2768041 | 119.8243413 | 149.623588 | 1.24869 |
| hypothetical protein                                                                                                                                                              | 3417 | 2768050 | 2768460 | 173.1707317 | 268.902439 | 1.55282 |
| Universal stress protein                                                                                                                                                          | 3416 | 2768476 | 2768961 | 251.5463918 | 264.43299  | 1.05123 |
| V-type ATP synthase subunit D (EC 3.6.3.14)                                                                                                                                       | 3415 | 2768958 | 2769581 | 178.9727127 | 202.247191 | 1.13004 |
| hypothetical protein                                                                                                                                                              | 3414 | 2769753 | 2769986 | 12.87553648 | 9.65665236 | 0.75    |
| hypothetical protein                                                                                                                                                              | 3413 | 2770061 | 2770327 | 33.83458647 | 0          | 0       |
| PIN domain protein                                                                                                                                                                | 3412 | 2770498 | 2770638 | 7.142857143 | 0          | 0       |
| hypothetical protein                                                                                                                                                              | 3411 | 2770775 | 2771071 | 16.89189189 | 45.6081081 | 2.7     |
| hypothetical protein                                                                                                                                                              | 3410 | 2771127 | 2771324 | 12.69035533 | 34.2639594 | 2.7     |
| Cell filamentation protein                                                                                                                                                        | 3409 | 2771341 | 2771679 | 20.71005917 | 6.65680473 | 0.32143 |
| hypothetical protein                                                                                                                                                              | 3408 | 2771633 | 2771791 | 28.48101266 | 0          | 0       |
| V-type ATP synthase subunit B (EC 3.6.3.14)                                                                                                                                       | 3407 | 2771819 | 2773243 | 156.2942008 | 92.291372  | 0.5905  |
| V-type ATP synthase subunit A (EC 3.6.3.14)                                                                                                                                       | 3406 | 2773251 | 2775059 | 227.3987798 | 143.510815 | 0.6311  |
| V-type ATPase, subunit E, putative [EC:3.6.3.14]                                                                                                                                  | 3405 | 2775052 | 2775669 | 125.6077796 | 76.5802269 | 0.60968 |
| V-type ATPase, subunit F, putative                                                                                                                                                | 3404 | 2775679 | 2776020 | 101.1730205 | 65.9824047 | 0.65217 |
| V-type ATP synthase subunit K (EC 3.6.3.14)                                                                                                                                       | 3403 | 2776024 | 2776341 | 123.0283912 | 42.5867508 | 0.34615 |
| V-type ATP synthase subunit I (EC 3.6.3.14)                                                                                                                                       | 3402 | 2776371 | 2778437 | 98.74152953 | 66.4327202 | 0.67279 |
| Uncharacterized protein TP_0534                                                                                                                                                   | 3401 | 2778434 | 2779468 | 130.0773694 | 104.448743 | 0.80297 |
| hypothetical protein                                                                                                                                                              | 3400 | 2779470 | 2779781 | 329.5819936 | 318.327974 | 0.96585 |
| PTS system, fructose-specific IIA component (EC 2.7.1.69) / PTS system, fructose-specific IIB component (EC 2.7.1.69) / PTS system, fructose-specific IIC component (EC 2.7.1.69) | 3399 | 2779801 | 2780274 | 270.6131078 | 475.687104 | 1.75781 |
| Preprotein translocase subunit SecG (TC 3.A.5.1.1)                                                                                                                                | 3398 | 2780288 | 2780698 | 709.7560976 | 773.780488 | 1.09021 |
| Acetoin utilization protein AcuB                                                                                                                                                  | 3397 | 2780782 | 2781426 | 230.5900621 | 160.714286 | 0.69697 |
| hypothetical protein                                                                                                                                                              | 3396 | 2781426 | 2781758 | 131.0240964 | 149.096386 | 1.13793 |
| Uroporphyrinogen-III decarboxylase                                                                                                                                                | 3395 | 2781921 | 2782898 | 32.24155578 | 32.2415558 | 1       |
| hypothetical protein                                                                                                                                                              | 3394 | 2782972 | 2783178 | 36.40776699 | 10.9223301 | 0.3     |
| hypothetical protein                                                                                                                                                              | 3393 | 2783197 | 2784315 | 38.90876565 | 32.2003578 | 0.82759 |
| Xylose repressor XylR (ROK family)                                                                                                                                                | 3392 | 2784317 | 2785522 | 34.02489627 | 7.46887967 | 0.21951 |
| Branched-chain amino acid transport ATP-binding protein livF (TC 3.A.1.4.1)                                                                                                       |      | 2785536 | 2786039 | 41.74950298 | 58.1510934 | 1.39286 |
| Branched-chain amino acid transport ATP-binding protein livF (TC 3.A.1.4.1)                                                                                                       |      | 2786045 | 2786248 | 32.01970443 | 0          | 0       |
| Branched-chain amino acid transport ATP-binding protein livG (TC 3.A.1.4.1)                                                                                                       | 3389 | 2786241 | 2787050 | 73.54758962 | 97.342398  | 1.32353 |
| Branched-chain amino acid transport system permease protein livM (TC 3.A.1.4.1)                                                                                                   | 3388 | 2787047 | 2788036 | 51.56723964 | 50.0505561 | 0.97059 |
| High-affinity branched-chain amino acid transport system permease protein LivH (TC 3.A.1.4.1)                                                                                     | 3387 | 2788039 | 2788926 | 81.17249154 | 76.0992108 | 0.9375  |
| Branched-chain amino acid ABC transporter, amino acid-binding protein (TC 3.A.1.4.1)                                                                                              | 3386 | 2788977 | 2790119 | 573.117338  | 732.924694 | 1.27884 |
| sensory box histidine kinase/response regulator                                                                                                                                   | 3385 | 2790283 | 2792733 | 47.25859247 | 15.6505728 | 0.33117 |

|                                                                                       |      |         |         |             |            |         |
|---------------------------------------------------------------------------------------|------|---------|---------|-------------|------------|---------|
| Phosphoglycerate kinase (EC 2.7.2.3)                                                  | 3384 | 2792816 | 2794822 | 726.4957265 | 729.638009 | 1.00433 |
| NAD-dependent glyceraldehyde-3-phosphate dehydrogenase (EC 1.2.1.12)                  | 3383 | 2794912 | 2795985 | 2421.052632 | 3320.0188  | 1.37131 |
| Putative sugar transporter                                                            | 3382 | 2796035 | 2797414 | 66.3524293  | 55.4749819 | 0.83607 |
| hypothetical protein                                                                  | 3381 | 2797415 | 2797987 | 133.7412587 | 247.814685 | 1.85294 |
| Valyl-tRNA synthetase (EC 6.1.1.9)                                                    | 3380 | 2797996 | 2800677 | 238.3439015 | 280.305856 | 1.17606 |
| 4-hydroxy-3-methylbut-2-enyl diphosphate reductase (EC 1.17.1.2)                      | 3379 | 2800710 | 2801642 | 74.57081545 | 130.364807 | 1.7482  |
| Protein-export membrane protein secF (TC 3.A.5.1.1)                                   | 3378 | 2801755 | 2802990 | 300.8097166 | 493.724696 | 1.64132 |
| Protein-export membrane protein secD (TC 3.A.5.1.1)                                   | 3377 | 2802990 | 2804732 | 472.1584386 | 928.673938 | 1.96687 |
| Preprotein translocase subunit YajC (TC 3.A.5.1.1)                                    | 3376 | 2804757 | 2805155 | 413.3165829 | 853.643216 | 2.06535 |
| hypothetical protein                                                                  | 3375 | 2805229 | 2805516 | 153.3101045 | 219.512195 | 1.43182 |
| Rubredoxin                                                                            | 3374 | 2805524 | 2805685 | 1083.850932 | 1173.91304 | 1.08309 |
| TPR domain protein, putative component of TonB system                                 | 3373 | 2805775 | 2807487 | 189.8364486 | 202.39486  | 1.06615 |
| hypothetical protein                                                                  | 3372 | 2807484 | 2808041 | 67.32495512 | 40.3949731 | 0.6     |
| ortholog to <i>Borrelia burgdorferi</i> BB0398                                        | 3371 | 2808106 | 2809197 | 102.6581118 | 63.9321723 | 0.62277 |
| Membrane-bound lytic murein transglycosylase D precursor (EC 3.2.1.-)                 | 3370 | 2809181 | 2810611 | 46.15384615 | 40.9090909 | 0.88636 |
| OmpA family protein                                                                   | 3369 | 2810616 | 2811521 | 117.1270718 | 116.850829 | 0.99764 |
| Ferredoxin                                                                            | 3368 | 2811533 | 2812621 | 82.26102941 | 76.5165441 | 0.93017 |
| hypothetical protein                                                                  | 3367 | 2812699 | 2813610 | 175.6311745 | 227.222832 | 1.29375 |
| ABC transporter substrate binding protein (EC 2.5.1.47)                               | 3366 | 2813619 | 2814686 | 122.7741331 | 99.1096532 | 0.80725 |
| Putative ABC transporter ATP-binding protein                                          | 3365 | 2814683 | 2815417 | 189.373297  | 153.269755 | 0.80935 |
| ABC transporter permease protein                                                      | 3364 | 2815428 | 2816201 | 75.03234153 | 46.5717982 | 0.62069 |
| hypothetical protein                                                                  | 3363 | 2816088 | 2816225 | 0           | 0          | #DIV/0! |
| Sensory box histidine kinase/response regulator                                       | 3362 | 2816232 | 2817395 | 150.0429923 | 147.033534 | 0.97994 |
| Argininosuccinate lyase (EC 4.3.2.1)                                                  | 3361 | 2817415 | 2818827 | 152.266289  | 141.820113 | 0.9314  |
| Argininosuccinate synthase (EC 6.3.4.5)                                               | 3360 | 2818855 | 2820123 | 360.5845182 | 341.232227 | 0.94633 |
| L-serine dehydratase, beta subunit (EC 4.3.1.17)                                      | 3359 | 2820192 | 2820905 | 40.67321178 | 31.5568022 | 0.77586 |
| L-serine dehydratase, alpha subunit (EC 4.3.1.17)                                     | 3358 | 2820902 | 2821846 | 58.26271186 | 30.9851695 | 0.53182 |
| hypothetical protein                                                                  | 3357 | 2821950 | 2822090 | 46.42857143 | 0          | 0       |
| hypothetical protein                                                                  | 3356 | 2822398 | 2822898 | 356         | 450        | 1.26404 |
| ABC transporter, ATP-binding protein                                                  | 3355 | 2823309 | 2824328 | 47.10500491 | 30.9126595 | 0.65625 |
| ABC-type multidrug transport system, permease component                               | 3354 | 2824328 | 2825125 | 25.09410289 | 2.82308657 | 0.1125  |
| conserved membrane protein, multidrug efflux associated                               | 3353 | 2825122 | 2825916 | 32.11586902 | 14.1687657 | 0.44118 |
| hypothetical protein                                                                  | 3352 | 2825992 | 2826159 | 13.24503311 | 0          | 0       |
| transposase, IS30 family                                                              | 3351 | 2826309 | 2827337 | 54.96108949 | 41.5856031 | 0.75664 |
| Acetylornithine aminotransferase (EC 2.6.1.11)                                        | 3350 | 2827432 | 2828634 | 127.703827  | 174.084859 | 1.36319 |
| Acetylglutamate kinase (EC 2.7.2.8)                                                   | 3349 | 2828657 | 2829538 | 97.44779582 | 154.00232  | 1.58036 |
| Glutamate N-acetyltransferase (EC 2.3.1.35) / N-acetylglutamate synthase (EC 2.3.1.1) | 3348 | 2829554 | 2830777 | 113.2461161 | 132.461161 | 1.16968 |

|                                                                                                                           |      |         |         |             |            |         |
|---------------------------------------------------------------------------------------------------------------------------|------|---------|---------|-------------|------------|---------|
| N-acetyl-gamma-glutamyl-phosphate reductase<br>(EC 1.2.1.38)                                                              | 3347 | 2830797 | 2831942 | 106.0473269 | 205.08326  | 1.93388 |
| hypothetical protein                                                                                                      | 3346 | 2832075 | 2832461 | 147.9057592 | 212.041885 | 1.43363 |
| Uncharacterized protein TP_0625                                                                                           | 3344 | 2832580 | 2832918 | 359.4674556 | 539.201183 | 1.5     |
| Expressed protein                                                                                                         | 3345 | 2832902 | 2834002 | 70.90909091 | 34.7727273 | 0.49038 |
| Uncharacterized protein MJ1020                                                                                            | 3343 | 2834022 | 2834864 | 117.5771971 | 104.216152 | 0.88636 |
| Transcriptional regulator                                                                                                 | 3342 | 2834880 | 2837792 | 61.3823934  | 61.8982118 | 1.0084  |
| Tyrosyl-tRNA synthetase (EC 6.1.1.1)                                                                                      | 3341 | 2837795 | 2839039 | 237.1382637 | 354.501608 | 1.49492 |
| hypothetical protein                                                                                                      | 3340 | 2839101 | 2839490 | 194.0874036 | 161.953728 | 0.83444 |
| Pyruvate,phosphate dikinase (EC 2.7.9.1)                                                                                  |      | 2839616 | 2842300 | 589.6050671 | 459.388972 | 0.77915 |
| Uncharacterized protein TP_0747                                                                                           | 3338 | 2842316 | 2843392 | 513.9405204 | 424.488848 | 0.82595 |
| Cytoplasmic filament protein A                                                                                            | 3337 | 2843469 | 2845505 | 2020.628684 | 2955.05894 | 1.46245 |
| hypothetical protein                                                                                                      | 3336 | 2845722 | 2846240 | 357.1428571 | 416.988417 | 1.16757 |
| DHH family/DHHA1 domain protein                                                                                           | 3335 | 2846250 | 2847230 | 101.0204082 | 94.1326531 | 0.93182 |
| Uncharacterized protein BB_0038                                                                                           | 3334 | 2847227 | 2848723 | 139.075067  | 119.135389 | 0.85663 |
| hypothetical protein                                                                                                      | 3333 | 2848724 | 2849674 | 140         | 156.315789 | 1.11654 |
| hypothetical protein                                                                                                      | 3332 | 2849661 | 2849969 | 123.3766234 | 124.188312 | 1.00658 |
| tRNA-i(6)A37 methylthiotransferase                                                                                        | 3331 | 2850008 | 2851354 | 70.95096582 | 43.46211   | 0.61257 |
| hypothetical protein                                                                                                      | 3330 | 2851364 | 2851744 | 76.31578947 | 29.6052632 | 0.38793 |
| GTP cyclohydrolase I (EC 3.5.4.16) type 2                                                                                 | 3329 | 2851737 | 2852561 | 55.82524272 | 87.3786408 | 1.56522 |
| Methylenetetrahydrofolate dehydrogenase<br>(NADP+) (EC 1.5.1.5) / Methenyltetrahydrofolate<br>cyclohydrolase (EC 3.5.4.9) | 3328 | 2852558 | 2853421 | 106.6048667 | 104.28737  | 0.97826 |
| Thiamin pyrophosphokinase (EC 2.7.6.2)                                                                                    | 3327 | 2853405 | 2854088 | 123.7188873 | 177.891654 | 1.43787 |
| tRNA nucleotidyltransferase (EC 2.7.7.25)                                                                                 | 3326 | 2854140 | 2855522 | 144.3560058 | 174.204052 | 1.20677 |
| Ribonuclease III (EC 3.1.26.3)                                                                                            | 3325 | 2855527 | 2856213 | 222.303207  | 249.271137 | 1.12131 |
| Acyl carrier protein                                                                                                      | 3324 | 2856272 | 2856508 | 1650.423729 | 3117.58475 | 1.88896 |
| LSU ribosomal protein L32p                                                                                                | 3323 | 2856520 | 2856708 | 1651.595745 | 2992.02128 | 1.81159 |
| Phosphopantetheine adenylyltransferase (EC<br>2.7.7.3)                                                                    | 3322 | 2856807 | 2857391 | 104.4520548 | 107.876712 | 1.03279 |
| Uncharacterized lipoprotein TP_0503 precursor                                                                             | 3321 | 2857410 | 2858000 | 530.5084746 | 575.847458 | 1.08546 |
| Uncharacterized protein TP_0608                                                                                           | 3320 | 2858036 | 2858794 | 863.4564644 | 1009.23483 | 1.16883 |
| hypothetical protein                                                                                                      | 3319 | 2858826 | 2859932 | 316.9077758 | 347.875226 | 1.09772 |
| hypothetical protein                                                                                                      | 3317 | 2860110 | 2860961 | 29.96474736 | 21.1515864 | 0.70588 |
| Adenylate cyclase (EC 4.6.1.1)                                                                                            | 3316 | 2861031 | 2863781 | 83.69723435 | 68.7772926 | 0.82174 |
| Filamentous haemagglutinin domain protein                                                                                 |      | 2863955 | 2865895 | 267.2680412 | 373.453608 | 1.3973  |
| hypothetical protein                                                                                                      |      | 2865896 | 2866588 | 117.7745665 | 201.589595 | 1.71166 |
| hypothetical protein                                                                                                      | 3313 | 2866601 | 2867881 | 70.703125   | 89.6484375 | 1.26796 |
| hypothetical protein                                                                                                      | 3312 | 2867878 | 2868330 | 206.8584071 | 398.230088 | 1.92513 |
| hypothetical protein                                                                                                      | 3311 | 2868485 | 2868850 | 47.94520548 | 18.4931507 | 0.38571 |
| hypothetical protein                                                                                                      | 3310 | 2868868 | 2870082 | 39.95057661 | 37.0675453 | 0.92784 |
| hypothetical protein                                                                                                      | 3309 | 2870079 | 2870615 | 52.23880597 | 20.988806  | 0.40179 |
| Translation elongation factor Tu                                                                                          | 3308 | 2870625 | 2871128 | 36.77932406 | 35.7852883 | 0.97297 |
| hypothetical protein                                                                                                      | 3307 | 2871165 | 2872016 | 52.29142186 | 50.2350176 | 0.96067 |
| unknown                                                                                                                   | 3306 | 2872026 | 2873120 | 57.1297989  | 30.8500914 | 0.54    |
| hypothetical protein                                                                                                      | 3305 | 2873121 | 2873963 | 102.7315914 | 90.8551069 | 0.88439 |
| Cell surface protein                                                                                                      | 3304 | 2874168 | 2877452 | 103.5322777 | 87.6979294 | 0.84706 |
| Flagellar hook-length control protein fliK                                                                                |      | 2877468 | 2880260 | 120.1647564 | 127.32808  | 1.05961 |
| hypothetical protein                                                                                                      | 3302 | 2880273 | 2880392 | 25.21008403 | 0          | 0       |
| hypothetical protein                                                                                                      | 3301 | 2880389 | 2880733 | 502.9069767 | 608.284884 | 1.20954 |
| hypothetical protein                                                                                                      | 3300 | 2880730 | 2881020 | 224.137931  | 217.241379 | 0.96923 |

|                                                                                                                  |      |         |         |             |            |         |
|------------------------------------------------------------------------------------------------------------------|------|---------|---------|-------------|------------|---------|
| hypothetical protein                                                                                             | 3299 | 2881080 | 2881229 | 46.97986577 | 45.3020134 | 0.96429 |
| hypothetical protein                                                                                             | 3298 | 2881188 | 2881439 | 323.8866397 | 300.607287 | 0.92813 |
| hypothetical protein                                                                                             | 3297 | 2881449 | 2881694 | 475.5102041 | 293.877551 | 0.61803 |
| hypothetical protein                                                                                             | 3296 | 2881728 | 2883092 | 185.8504399 | 255.681818 | 1.37574 |
| hypothetical protein                                                                                             | 3295 | 2883108 | 2884478 | 94.16058394 | 114.963504 | 1.22093 |
| internalin, putative                                                                                             |      | 2884490 | 2886433 | 60.21616058 | 89.1662378 | 1.48077 |
| Flagellar hook-length control protein fliK                                                                       |      | 2886825 | 2888744 | 62.79312142 | 80.9015112 | 1.28838 |
| putative autotransporter protein                                                                                 | 3292 | 2888798 | 2889964 | 134.6483705 | 164.022298 | 1.21815 |
| Outer membrane autotransporter barrel                                                                            | 3291 | 2890066 | 2891124 | 153.5916824 | 163.752363 | 1.06615 |
| hypothetical protein                                                                                             | 3289 | 2891111 | 2891308 | 76.14213198 | 68.5279188 | 0.9     |
| putative autotransporter protein                                                                                 | 3290 | 2891301 | 2892386 | 102.3041475 | 151.382488 | 1.47973 |
| hypothetical protein                                                                                             | 3288 | 2892407 | 2892811 | 221.5346535 | 400.990099 | 1.81006 |
| conserved hypothetical protein-putative a<br>phosphoesterase or an exonuclease,<br>fig 138119.3.peg.2719 homolog | 3287 | 2892903 | 2894117 | 91.0214168  | 122.3229   | 1.34389 |
| hypothetical protein                                                                                             | 3286 | 2894121 | 2894819 | 207.0200573 | 270.773639 | 1.30796 |
| type 4 fimbrial biogenesis protein PilY1                                                                         | 3285 | 2894889 | 2897486 | 217.3661918 | 313.631113 | 1.44287 |
| hypothetical protein                                                                                             | 3284 | 2897646 | 2899004 | 620.7658321 | 843.335788 | 1.35854 |
| hypothetical protein                                                                                             | 3283 | 2899127 | 2899405 | 57.55395683 | 56.6546763 | 0.98438 |
| hypothetical protein                                                                                             | 3282 | 2899563 | 2899787 | 24.55357143 | 10.0446429 | 0.40909 |
| hypothetical protein                                                                                             | 3281 | 2899866 | 2900135 | 66.91449814 | 8.36431227 | 0.125   |
| hypothetical protein                                                                                             | 3280 | 2900145 | 2900375 | 206.5217391 | 107.608696 | 0.52105 |
| Transcriptional regulator, LuxR family                                                                           | 3279 | 2900417 | 2901808 | 102.4442847 | 85.7296909 | 0.83684 |
| Glycerol-3-phosphate ABC transporter,<br>periplasmic glycerol-3-phosphate-binding protein<br>(TC 3.A.1.1.3)      | 3278 | 2901821 | 2903149 | 69.27710843 | 84.7138554 | 1.22283 |
| hypothetical protein                                                                                             | 3277 | 2903289 | 2905703 | 38.31814416 | 34.4863297 | 0.9     |
| Sensor histidine protein kinase UhpB, glucose-6-<br>phosphate specific (EC 2.7.13.3)                             | 3276 | 2905696 | 2907075 | 43.5097897  | 22.8426396 | 0.525   |
| Two component transcriptional regulator, LuxR<br>family                                                          | 3275 | 2907068 | 2907724 | 143.2926829 | 157.77439  | 1.10106 |
| sensory box histidine kinase/response regulator                                                                  | 3274 | 2907736 | 2910894 | 64.34699714 | 52.1925643 | 0.81111 |
| Two component transcriptional regulator VraR,<br>LuxR family                                                     | 3273 | 2910913 | 2911596 | 117.8623719 | 102.122987 | 0.86646 |
| hypothetical protein                                                                                             | 3272 | 2911669 | 2913177 | 195.9549072 | 223.806366 | 1.14213 |
| TPR domain protein, putative component of TonB<br>system                                                         | 3271 | 2913187 | 2913804 | 145.0567261 | 120.340357 | 0.82961 |
| Phosphoesterase family protein                                                                                   | 3270 | 2913811 | 2914641 | 112.0481928 | 100.301205 | 0.89516 |
| hypothetical protein                                                                                             | 3269 | 2914634 | 2915059 | 37.64705882 | 21.1764706 | 0.5625  |
| hypothetical protein                                                                                             | 3268 | 2915243 | 2915776 | 749.5309568 | 692.307692 | 0.92365 |
| Sugar phosphate isomerases/epimerases                                                                            | 3267 | 2915908 | 2916702 | 109.5717884 | 102.015113 | 0.93103 |
| Choline-sulfatase (EC 3.1.6.6)                                                                                   | 3266 | 2916716 | 2918113 | 124.5526127 | 95.0250537 | 0.76293 |
| D-galactose 1-dehydrogenase (EC 1.1.1.48)                                                                        | 3265 | 2918114 | 2919124 | 88.11881188 | 44.5544554 | 0.50562 |
| AraC-type DNA-binding domain-containing protein                                                                  | 3264 | 2919172 | 2919978 | 26.05459057 | 2.79156328 | 0.10714 |
| Myo-inositol 2-dehydrogenase (EC 1.1.1.18)                                                                       | 3263 | 2920001 | 2921104 | 57.11695376 | 36.7180417 | 0.64286 |
| Choline-sulfatase (EC 3.1.6.6)                                                                                   | 3262 | 2921110 | 2922483 | 43.69992717 | 13.1099782 | 0.3     |
| ABC transporter, substrate-binding protein                                                                       | 3261 | 2922493 | 2924085 | 36.11809045 | 9.89321608 | 0.27391 |
| Predicted beta-xyloside ABC transporter,<br>permease component                                                   | 3260 | 2924097 | 2925035 | 28.78464819 | 9.59488273 | 0.33333 |
| ABC transporter, permease protein                                                                                | 3259 | 2925045 | 2925935 | 41.01123596 | 27.8089888 | 0.67808 |

|                                                                                                                                 |      |         |         |             |            |         |
|---------------------------------------------------------------------------------------------------------------------------------|------|---------|---------|-------------|------------|---------|
| Dehydrogenase                                                                                                                   | 3258 | 2925938 | 2927026 | 255.9742647 | 281.25     | 1.09874 |
| hypothetical protein                                                                                                            | 3257 | 2927048 | 2927776 | 149.7252747 | 154.532967 | 1.03211 |
| Deoxyribose-phosphate aldolase (EC 4.1.2.4)                                                                                     | 3256 | 2927802 | 2928449 | 472.9520866 | 452.086553 | 0.95588 |
| DinB family protein                                                                                                             | 3255 | 2928458 | 2929000 | 454.797048  | 419.280443 | 0.92191 |
| Xanthine/uracil/thiamine/ascorbate permease family protein                                                                      | 3254 | 2929015 | 2930310 | 233.2046332 | 244.980695 | 1.0505  |
| Multiple sugar ABC transporter, membrane-spanning permease protein MsmG                                                         | 3253 | 2930382 | 2931236 | 159.2505855 | 137.002342 | 0.86029 |
| Multiple sugar ABC transporter, membrane-spanning permease protein MsmF                                                         | 3252 | 2931238 | 2932143 | 140.3314917 | 183.977901 | 1.31102 |
| Multiple sugar ABC transporter, substrate-binding protein                                                                       | 3251 | 2932155 | 2933447 | 1200.851393 | 1205.10836 | 1.00354 |
| Periplasmic [Fe] hydrogenase large subunit (EC 1.12.7.2)                                                                        | 3250 | 2933642 | 2935399 | 1111.838361 | 1046.2436  | 0.941   |
| NAD-reducing hydrogenase subunit HoxF (EC 1.12.1.2)                                                                             | 3249 | 2935410 | 2937215 | 660.4560623 | 802.141268 | 1.21453 |
| NADP-reducing hydrogenase, subunit B                                                                                            | 3248 | 2937229 | 2937624 | 745.5696203 | 1150.63291 | 1.54329 |
| Flagellar sensor histidine kinase fleS                                                                                          | 3247 | 2937640 | 2938245 | 439.6694215 | 557.85124  | 1.2688  |
| NAD-dependent formate dehydrogenase gamma subunit                                                                               | 3246 | 2938313 | 2938801 | 935.4508197 | 1364.7541  | 1.45893 |
| hypothetical protein                                                                                                            | 3245 | 2938872 | 2938985 | 4.424778761 | 0          | 0       |
| hypothetical protein                                                                                                            | 3244 | 2938948 | 2939190 | 18.59504132 | 27.892562  | 1.5     |
| hypothetical protein                                                                                                            | 3243 | 2939657 | 2940394 | 50.20352782 | 27.4762551 | 0.5473  |
| hypothetical protein                                                                                                            | 3242 | 2940519 | 2940635 | 267.2413793 | 271.551724 | 1.01613 |
| hypothetical protein                                                                                                            | 3241 | 2940801 | 2941772 | 71.57569516 | 50.9783728 | 0.71223 |
| hypothetical protein                                                                                                            | 3240 | 2942065 | 2942811 | 134.0482574 | 129.691689 | 0.9675  |
| Long-chain-fatty-acid--CoA ligase (EC 6.2.1.3)                                                                                  | 3239 | 2942864 | 2944576 | 371.4953271 | 406.103972 | 1.09316 |
| Putative malate dehydrogenase (EC 1.1.1.37), similar to archaeal MJ1425                                                         | 3238 | 2944601 | 2945683 | 75.32347505 | 83.1792976 | 1.10429 |
| Histidinol dehydrogenase (EC 1.1.1.23)                                                                                          | 3237 | 2945715 | 2947043 | 52.71084337 | 76.2424699 | 1.44643 |
| Histidinol-phosphate aminotransferase (EC 2.6.1.9)                                                                              | 3236 | 2947045 | 2948025 | 44.89795918 | 75.7653061 | 1.6875  |
| Phosphoribosyl-AMP cyclohydrolase (EC 3.5.4.19) / Phosphoribosyl-ATP pyrophosphatase (EC 3.6.1.31)                              | 3235 | 2948145 | 2949461 | 124.2401216 | 201.74772  | 1.62385 |
| Imidazole glycerol phosphate synthase cyclase subunit (EC 4.1.3.-)                                                              | 3234 | 2949455 | 2950225 | 135.7142857 | 254.220779 | 1.87321 |
| Imidazole glycerol phosphate synthase amidotransferase subunit (EC 2.4.2.-)                                                     | 3233 | 2950235 | 2950855 | 129.0322581 | 228.629032 | 1.77188 |
| Imidazoleglycerol-phosphate dehydratase (EC 4.2.1.19)                                                                           | 3232 | 2950852 | 2951421 | 110.7205624 | 189.806678 | 1.71429 |
| ATP phosphoribosyltransferase (EC 2.4.2.17)                                                                                     | 3231 | 2951438 | 2952292 | 186.1826698 | 279.274005 | 1.5     |
| Predicted molybdate-responsive regulator YvgK in bacilli                                                                        | 3230 | 2952496 | 2953575 | 84.80074143 | 79.2400371 | 0.93443 |
| Molybdenum ABC transporter, periplasmic molybdenum-binding protein modA (TC 3.A.1.8.1)                                          | 3229 | 2953661 | 2954485 | 50.36407767 | 40.9587379 | 0.81325 |
| Molybdenum transport ATP-binding protein modC (TC 3.A.1.8.1) / Molybdenum transport system permease protein modB (TC 3.A.1.8.1) |      | 2954491 | 2955156 | 57.14285714 | 16.9172932 | 0.29605 |
| hypothetical protein                                                                                                            | 3228 | 2955131 | 2955289 | 6.329113924 | 0          | 0       |



|                                                                                                                                            |      |         |         |             |            |         |
|--------------------------------------------------------------------------------------------------------------------------------------------|------|---------|---------|-------------|------------|---------|
| Molybdenum transport ATP-binding protein modC (TC 3.A.1.8.1) / Molybdenum transport system permease protein modB (TC 3.A.1.8.1)            |      | 2955267 | 2956223 | 17.25941423 | 7.06066946 | 0.40909 |
| Molybdate-binding domain of ModE hypothetical protein                                                                                      | 3225 | 2956270 | 2956479 | 200.9569378 | 236.842105 | 1.17857 |
| 2-isopropylmalate synthase (EC 2.3.3.13)                                                                                                   | 3224 | 2956487 | 2956879 | 122.4489796 | 80.3571429 | 0.65625 |
| Ferredoxin, 2Fe-2S                                                                                                                         | 3223 | 2956869 | 2958434 | 31.30990415 | 20.1277955 | 0.64286 |
| FeMo cofactor biosynthesis protein NifB                                                                                                    | 3222 | 2958444 | 2958752 | 43.83116883 | 7.30519481 | 0.16667 |
| Nitrogenase molybdenum-cofactor synthesis protein NifN                                                                                     | 3221 | 2958794 | 2960062 | 21.68769716 | 12.4211356 | 0.57273 |
| Nitrogenase molybdenum-cofactor synthesis protein NifE                                                                                     | 3220 | 2960072 | 2961463 | 29.4751977  | 4.85262401 | 0.16463 |
| Nitrogenase (molybdenum-iron) beta chain (EC 1.18.6.1)                                                                                     | 3219 | 2961460 | 2962818 | 19.2165558  | 9.97782705 | 0.51923 |
| Nitrogenase (molybdenum-iron) alpha chain (EC 1.18.6.1)                                                                                    | 3218 | 2962829 | 2964205 | 23.86196769 | 9.91189427 | 0.41538 |
| Nitrogen regulatory protein P-II                                                                                                           | 3217 | 2964216 | 2965853 | 30.84911423 | 21.9914478 | 0.71287 |
| Nitrogen regulatory protein P-II                                                                                                           | 3216 | 2965872 | 2966252 | 38.15789474 | 11.8421053 | 0.31034 |
| Nitrogenase iron protein (EC 1.18.6.1)                                                                                                     | 3215 | 2966249 | 2966614 | 28.76712329 | 6.16438356 | 0.21429 |
| Mo/Fe-nitrogenase-specific transcriptional regulator NifA                                                                                  | 3214 | 2966630 | 2967454 | 26.44526445 | 13.8376384 | 0.52326 |
| hypothetical protein                                                                                                                       | 3213 | 2967751 | 2969286 | 48.20846906 | 5.86319218 | 0.12162 |
| hypothetical protein                                                                                                                       | 3212 | 2969298 | 2970503 | 42.73858921 | 24.2738589 | 0.56796 |
| Uncharacterized protein TP_0584                                                                                                            | 3211 | 2970521 | 2971318 | 37.64115433 | 11.2923463 | 0.3     |
|                                                                                                                                            | 3210 | 2971426 | 2972829 | 163.2216679 | 157.163222 | 0.96288 |
| Oligopeptide ABC transporter, periplasmic oligopeptide-binding protein oppA (TC 3.A.1.5.1)                                                 | 3209 | 2972839 | 2974536 | 137.3011196 | 148.497348 | 1.08155 |
| Transcriptional regulator                                                                                                                  | 3208 | 2974590 | 2975087 | 524.1448692 | 823.943662 | 1.57198 |
| 2-C-methyl-D-erythritol 4-phosphate cytidyltransferase (EC 2.7.7.60) / 2-C-methyl-D-erythritol 2,4-cyclodiphosphate synthase (EC 4.6.1.12) | 3207 | 2975094 | 2975840 | 263.4048257 | 331.769437 | 1.25954 |
| Glycerol kinase (EC 2.7.1.30)                                                                                                              | 3205 | 2975857 | 2977341 | 100         | 101.020408 | 1.0102  |
| Methionine ABC transporter permease protein                                                                                                | 3206 | 2977338 | 2978018 | 42.64705882 | 46.3235294 | 1.08621 |
| Methionine ABC transporter ATP-binding protein                                                                                             | 3204 | 2978011 | 2979048 | 43.87656702 | 23.8669238 | 0.54396 |
| Peptide methionine sulfoxide reductase                                                                                                     | 3203 | 2979045 | 2980037 | 27.72177419 | 27.2177419 | 0.98182 |
| Methionine ABC transporter substrate-binding protein                                                                                       | 3202 | 2980066 | 2980902 | 80.14354067 | 129.186603 | 1.61194 |
| N-acetyl-L,L-diaminopimelate deacetylase homolog (EC 3.5.1.18)                                                                             | 3201 | 2981071 | 2982210 | 100.9657594 | 69.1395961 | 0.68478 |
| Cystathionine beta-lyase (EC 4.4.1.8)                                                                                                      | 3200 | 2982226 | 2983374 | 135.0174216 | 88.1968641 | 0.65323 |
| O-acetylhomoserine sulfhydrylase (EC 4.2.99.10) / O-succinylhomoserine sulfhydrylase (EC 4.2.99.9)                                         | 3199 | 2983387 | 2985525 | 118.3348924 | 74.7193639 | 0.63142 |
| hypothetical protein                                                                                                                       | 3198 | 2985795 | 2985917 | 8.196721311 | 0          | 0       |
| cell surface protein                                                                                                                       | 3197 | 2986047 | 2987003 | 48.11715481 | 23.5355649 | 0.48913 |
| Asr2958 protein                                                                                                                            | 3196 | 2987447 | 2987698 | 266.9322709 | 295.816733 | 1.10821 |
| Asr2959 protein                                                                                                                            | 3195 | 2987773 | 2988027 | 102.3622047 | 79.7244094 | 0.77885 |
| HtrA protease/chaperone protein                                                                                                            | 3194 | 2988270 | 2989517 | 220.9302326 | 187.650361 | 0.84936 |
| hypothetical protein                                                                                                                       | 3193 | 2989538 | 2990965 | 176.5942537 | 137.175893 | 0.77679 |
| Nucleoside-diphosphate-sugar epimerases                                                                                                    | 3192 | 2990999 | 2991847 | 202.240566  | 127.358491 | 0.62974 |

|                                                                                                                                                                                         |      |         |         |             |            |         |
|-----------------------------------------------------------------------------------------------------------------------------------------------------------------------------------------|------|---------|---------|-------------|------------|---------|
| hypothetical protein                                                                                                                                                                    | 3191 | 2991875 | 2992084 | 131.5789474 | 183.014354 | 1.39091 |
| hypothetical protein                                                                                                                                                                    | 3190 | 2992122 | 2992331 | 122.0095694 | 75.3588517 | 0.61765 |
| hypothetical protein                                                                                                                                                                    | 3189 | 2992321 | 2992755 | 58.75576037 | 98.5023041 | 1.67647 |
| hypothetical protein                                                                                                                                                                    | 3188 | 2992763 | 2992948 | 35.13513514 | 0          | 0       |
| hypothetical protein                                                                                                                                                                    | 3187 | 2992984 | 2993151 | 11.9760479  | 0          | 0       |
| 2-haloalkanoic acid dehalogenase (EC 3.8.1.2)                                                                                                                                           | 3186 | 2993192 | 2993959 | 28.68318123 | 23.4680574 | 0.81818 |
| Myosin heavy chain, fast skeletal muscle, embryonic                                                                                                                                     | 3185 | 2993967 | 2996831 | 123.644631  | 130.640084 | 1.05658 |
| Endonuclease III (EC 4.2.99.18)                                                                                                                                                         | 3184 | 2996876 | 2997619 | 88.15612382 | 51.4804845 | 0.58397 |
| 2-C-methyl-D-erythritol 2,4-cyclodiphosphate synthase (EC 4.6.1.12)                                                                                                                     | 3183 | 2997616 | 2998098 | 80.91286307 | 70.0207469 | 0.86538 |
| Glycine N-methyltransferase (EC 2.1.1.20)                                                                                                                                               | 3182 | 2998119 | 2998898 | 75.09627728 | 86.6495507 | 1.15385 |
| hypothetical protein                                                                                                                                                                    | 3181 | 2998901 | 2999500 | 98.49749583 | 135.225376 | 1.37288 |
| Conserved domain protein                                                                                                                                                                |      | 2999565 | 2999774 | 629.1866029 | 409.090909 | 0.65019 |
| Adenylate cyclase (EC 4.6.1.1)                                                                                                                                                          | 3179 | 2999832 | 3001523 | 79.8344175  | 67.8592549 | 0.85    |
| almost identical to CIP1 (GI:836950) [Arabidopsis thaliana]; go_component: cytoskeleton [goid 0005856]; go_function: protein binding [goid 0005515] / COP1-interactive protein 1 / CIP1 |      |         |         |             |            |         |
| Topoisomerase IV subunit A (EC 5.99.1.-)                                                                                                                                                | 3178 | 3001545 | 3002897 | 152.3668639 | 161.427515 | 1.05947 |
| Na+ driven multidrug efflux pump                                                                                                                                                        | 3177 | 3002912 | 3004831 | 134.1844711 | 146.560709 | 1.09223 |
| Topoisomerase IV subunit B (EC 5.99.1.-)                                                                                                                                                | 3176 | 3004887 | 3006290 | 32.43050606 | 24.0555952 | 0.74176 |
| Myosin heavy chain                                                                                                                                                                      | 3175 | 3006313 | 3008223 | 169.8113208 | 188.679245 | 1.11111 |
| Translation elongation factor G-related protein                                                                                                                                         | 3174 | 3008230 | 3009357 | 181.8988465 | 131.76575  | 0.72439 |
| Helix-turn-helix motif                                                                                                                                                                  | 3173 | 3009464 | 3011548 | 424.184261  | 400.551823 | 0.94429 |
| hypothetical protein                                                                                                                                                                    | 3172 | 3011697 | 3011912 | 137.2093023 | 167.44186  | 1.22034 |
| Protein hipA                                                                                                                                                                            | 3171 | 3011909 | 3012238 | 74.46808511 | 95.7446809 | 1.28571 |
| Citrate synthase (si) (EC 2.3.3.1)                                                                                                                                                      | 3170 | 3012231 | 3013181 | 60.52631579 | 30.7894737 | 0.5087  |
| hypothetical protein                                                                                                                                                                    | 3169 | 3013187 | 3014527 | 161.5671642 | 226.679104 | 1.403   |
| hypothetical protein                                                                                                                                                                    | 3168 | 3014614 | 3014781 | 20.95808383 | 0          | 0       |
| hypothetical protein                                                                                                                                                                    | 3167 | 3014802 | 3014930 | 27.34375    | 17.578125  | 0.64286 |
| hypothetical protein                                                                                                                                                                    | 3166 | 3015086 | 3015523 | 19.45080092 | 15.4462243 | 0.79412 |
| hypothetical protein                                                                                                                                                                    | 3165 | 3015525 | 3016160 | 466.9291339 | 457.086614 | 0.97892 |
| Acetyl-coenzyme A synthetase (EC 6.2.1.1)                                                                                                                                               | 3164 | 3016162 | 3017961 | 367.9822123 | 425.236242 | 1.15559 |
| Transcriptional regulator, Hth-3 family                                                                                                                                                 | 3163 | 3017973 | 3018527 | 210.2888087 | 203.068592 | 0.96567 |
| Multidrug resistance ABC transporter ATP-binding and permease protein                                                                                                                   | 3162 | 3018579 | 3020420 | 51.33079848 | 39.1091798 | 0.7619  |
| Multidrug resistance ABC transporter ATP-binding and permease protein                                                                                                                   | 3161 | 3020420 | 3022231 | 58.53119823 | 57.1507454 | 0.97642 |
| hypothetical protein                                                                                                                                                                    | 3160 | 3022232 | 3022888 | 38.1097561  | 58.3079268 | 1.53    |
| Ribose 5-phosphate isomerase A (EC 5.3.1.6)                                                                                                                                             | 3159 | 3022892 | 3023608 | 94.97206704 | 59.7067039 | 0.62868 |
| 3-dehydroquinate dehydratase (EC 4.2.1.10) / Shikimate 5-dehydrogenase (EC 1.1.1.25)                                                                                                    | 3158 | 3023623 | 3025137 | 67.04095112 | 111.459709 | 1.66256 |
| hypothetical protein                                                                                                                                                                    | 3157 | 3025153 | 3025599 | 105.3811659 | 216.928251 | 2.05851 |
| Long-chain-fatty-acid--CoA ligase (EC 6.2.1.3)                                                                                                                                          | 3156 | 3025688 | 3027268 | 110.443038  | 88.2911392 | 0.79943 |
| Transcriptional regulator, TetR family                                                                                                                                                  | 3155 | 3027436 | 3028026 | 40.6779661  | 30.5084746 | 0.75    |
| hypothetical protein                                                                                                                                                                    | 3154 | 3028051 | 3028704 | 55.89586524 | 51.6845329 | 0.92466 |
| B. burgdorferi predicted coding region BB0418                                                                                                                                           | 3153 | 3028722 | 3029645 | 34.12784399 | 34.127844  | 1       |
| Serine/threonine protein kinase PrkC, regulation of stationary phase                                                                                                                    | 3152 | 3029824 | 3030870 | 242.3518164 | 232.313576 | 0.95858 |
| Methionyl-tRNA formyltransferase (EC 2.1.2.9)                                                                                                                                           | 3151 | 3030907 | 3031926 | 151.1285574 | 189.892051 | 1.25649 |
| Peptide deformylase (EC 3.5.1.88)                                                                                                                                                       | 3150 | 3031926 | 3032459 | 297.3733583 | 308.161351 | 1.03628 |

|                                                                                                                                                                                                                                                                                                                                           |      |         |         |             |            |         |
|-------------------------------------------------------------------------------------------------------------------------------------------------------------------------------------------------------------------------------------------------------------------------------------------------------------------------------------------|------|---------|---------|-------------|------------|---------|
| Mannose-1-phosphate guanylyltransferase (GDP)<br>(EC 2.7.7.22)                                                                                                                                                                                                                                                                            | 3149 | 3032524 | 3033708 | 155.4054054 | 144.425676 | 0.92935 |
| supporting cDNA gi 11908017 gb AF326856.1 ;<br>contains Pfam profile PF01965:DJ-1/Pfpl family;<br>identical to cDNA EST Athsr7 GI:5281061;<br>go_function: catalytic activity [goid 0003824];<br>go_process: thiamin biosynthesis [goid 0009228] /<br>4-methyl-5(b-hydroxyethyl)-thiazole<br>monophosphate biosynthesis protein, putative | 3148 | 3033724 | 3034290 | 139.1843972 | 91.7553191 | 0.65924 |
| Fructokinase (EC 2.7.1.4)                                                                                                                                                                                                                                                                                                                 | 3147 | 3034316 | 3035341 | 150.7317073 | 182.195122 | 1.20874 |
| Acetate kinase (EC 2.7.2.1)                                                                                                                                                                                                                                                                                                               | 3146 | 3035342 | 3036679 | 642.9107277 | 592.460615 | 0.92153 |
| DNA-binding heavy metal response regulator                                                                                                                                                                                                                                                                                                | 3145 | 3036818 | 3038083 | 135.1778656 | 142.29249  | 1.05263 |
| Circadian input kinase A                                                                                                                                                                                                                                                                                                                  | 3144 | 3038097 | 3040643 | 129.6150825 | 142.282011 | 1.09773 |
| Histidinol-phosphatase (EC 3.1.3.15)                                                                                                                                                                                                                                                                                                      | 3142 | 3040640 | 3041503 | 110.6604867 | 88.6442642 | 0.80105 |
| C4-type zinc finger protein, DksA/TraR family                                                                                                                                                                                                                                                                                             | 3143 | 3041457 | 3041813 | 466.2921348 | 613.061798 | 1.31476 |
| oxidoreductase domain protein                                                                                                                                                                                                                                                                                                             | 3140 | 3042109 | 3043248 | 334.9429324 | 418.788411 | 1.25033 |
| TPR repeat-containing protein TP_0123                                                                                                                                                                                                                                                                                                     | 3139 | 3043288 | 3046002 | 81.42962417 | 53.8872513 | 0.66176 |
| Ornithine carbamoyltransferase (EC 2.1.3.3)                                                                                                                                                                                                                                                                                               |      | 3046317 | 3047042 | 306.8965517 | 245.172414 | 0.79888 |
| Uncharacterized protein TP_0437                                                                                                                                                                                                                                                                                                           | 3137 | 3047182 | 3047607 | 555.2941176 | 651.176471 | 1.17267 |
| Aminopeptidase YpdF (MP-, MA-, MS-, AP-, NP-<br>specific)                                                                                                                                                                                                                                                                                 | 3136 | 3047607 | 3048779 | 263.225256  | 295.648464 | 1.12318 |
| conserved hypothetical protein-putative a<br>phosphoesterase or an exonuclease,<br>fig 138119.3.peg.2719 homolog                                                                                                                                                                                                                          | 3135 | 3048790 | 3049767 | 90.0716479  | 126.663255 | 1.40625 |
| hypothetical protein                                                                                                                                                                                                                                                                                                                      | 3134 | 3049856 | 3050719 | 23.75434531 | 5.21436848 | 0.21951 |
| Protein involved in catabolism of external DNA<br>COG1272: Predicted membrane protein                                                                                                                                                                                                                                                     | 3133 | 3050508 | 3051593 | 63.59447005 | 58.0645161 | 0.91304 |
| hemolysin III homolog                                                                                                                                                                                                                                                                                                                     | 3132 | 3051604 | 3052284 | 66.91176471 | 56.25      | 0.84066 |
| COG0488: ATPase components of ABC<br>transporters with duplicated ATPase domains                                                                                                                                                                                                                                                          | 3131 | 3052293 | 3053981 | 319.3701723 | 247.326203 | 0.77442 |
| anti-sigma F factor antagonist (spolIIA-2); anti<br>sigma b factor antagonist RsbV                                                                                                                                                                                                                                                        | 3130 | 3053986 | 3054339 | 86.40226629 | 19.121813  | 0.22131 |
| hypothetical protein                                                                                                                                                                                                                                                                                                                      | 3129 | 3054341 | 3055582 | 69.29895246 | 52.5785657 | 0.75872 |
| hypothetical protein                                                                                                                                                                                                                                                                                                                      | 3128 | 3055599 | 3056219 | 220.9677419 | 188.709677 | 0.85401 |
| Deoxyguanosinetriphosphate triphosphohydrolase<br>(EC 3.1.5.1)                                                                                                                                                                                                                                                                            | 3127 | 3056271 | 3057545 | 77.3155416  | 98.9010989 | 1.27919 |
| hypothetical protein                                                                                                                                                                                                                                                                                                                      | 3126 | 3057567 | 3058298 | 584.1313269 | 563.269494 | 0.96429 |
| Oxidoreductase                                                                                                                                                                                                                                                                                                                            | 3124 | 3058462 | 3059472 | 42.07920792 | 24.5049505 | 0.58235 |
| RND multidrug efflux transporter; Acriflavin<br>resistance protein                                                                                                                                                                                                                                                                        | 3123 | 3059486 | 3062635 | 52.25106802 | 49.5399277 | 0.94811 |
| Probable Co/Zn/Cd efflux system membrane<br>fusion protein                                                                                                                                                                                                                                                                                | 3122 | 3062645 | 3063613 | 70.09345794 | 79.4392523 | 1.13333 |
| Outer membrane protein                                                                                                                                                                                                                                                                                                                    | 3121 | 3063610 | 3064920 | 50.91883614 | 36.179173  | 0.71053 |
| hypothetical protein                                                                                                                                                                                                                                                                                                                      | 3120 | 3064981 | 3065142 | 0           | 0          | #DIV/0! |
| Uracil-DNA glycosylase (EC 3.2.2.-)                                                                                                                                                                                                                                                                                                       | 3119 | 3065182 | 3065931 | 73.43124166 | 30.0400534 | 0.40909 |
| Alpha-N-arabinofuranosidase (EC 3.2.1.55)                                                                                                                                                                                                                                                                                                 | 3118 | 3066011 | 3067531 | 72.36842105 | 54.7697368 | 0.75682 |
| Alpha-N-arabinofuranosidase 2 (EC 3.2.1.55)                                                                                                                                                                                                                                                                                               | 3117 | 3067799 | 3069283 | 24.25876011 | 0          | 0       |
| Oligopeptide ABC transporter, ATP-binding<br>protein                                                                                                                                                                                                                                                                                      | 3116 | 3069280 | 3070266 | 22.81947262 | 2.28194726 | 0.1     |
| Oligopeptide ABC transporter, ATP-binding<br>protein                                                                                                                                                                                                                                                                                      | 3115 | 3070263 | 3071255 | 22.68145161 | 6.80443548 | 0.3     |

|                                                                                                         |      |         |         |             |            |         |
|---------------------------------------------------------------------------------------------------------|------|---------|---------|-------------|------------|---------|
| ABC-type dipeptide/oligopeptide/nickel transport system, permease component                             | 3114 | 3071257 | 3072114 | 25.08751459 | 0          | 0       |
| Oligopeptide ABC transporter, permease protein                                                          | 3113 | 3072126 | 3073136 | 16.83168317 | 4.45544554 | 0.26471 |
| Oligopeptide ABC transporter, periplasmic oligopeptide-binding protein                                  | 3112 | 3073214 | 3075172 | 30.13278856 | 5.74565884 | 0.19068 |
| Alpha-N-arabinofuranosidase (EC 3.2.1.55)                                                               | 3111 | 3075304 | 3076797 | 29.13596785 | 4.52109846 | 0.15517 |
| Probable transcriptional regulator protein, ArsR family                                                 | 3110 | 3076875 | 3077822 | 58.6061246  | 54.6462513 | 0.93243 |
| archaeal ATPase, fused to C-terminal DUF234 domain                                                      | 3109 | 3077868 | 3079175 | 20.65799541 | 6.88599847 | 0.33333 |
| hypothetical protein                                                                                    | 3108 | 3079312 | 3080613 | 103.3820138 | 77.8247502 | 0.75279 |
| Sorbitol dehydrogenase (EC 1.1.1.14)                                                                    | 3107 | 3080682 | 3081731 | 392.7550048 | 379.647283 | 0.96663 |
| Fructokinase (EC 2.7.1.4)                                                                               | 3106 | 3081816 | 3082991 | 293.6170213 | 312.12766  | 1.06304 |
| Chorismate synthase (EC 4.2.3.5)                                                                        | 3105 | 3082993 | 3084105 | 138.4892086 | 117.356115 | 0.8474  |
| hypothetical protein                                                                                    | 3104 | 3084124 | 3084510 | 222.7979275 | 233.160622 | 1.04651 |
| GGDEF domain protein                                                                                    | 3103 | 3084507 | 3085514 | 137.5372393 | 174.28004  | 1.26715 |
| Uncharacterized protein MJ0150                                                                          | 3102 | 3085531 | 3086061 | 433.0188679 | 590.09434  | 1.36275 |
| DNA polymerase III alpha subunit (EC 2.7.7.7)                                                           | 3101 | 3086160 | 3090185 | 148.7665088 | 195.676551 | 1.31533 |
| conserved hypothetical membrane protein                                                                 | 3100 | 3090201 | 3090785 | 75.34246575 | 80.9075342 | 1.07386 |
| ATP-dependent DNA helicase RecG (EC 3.6.1.-)                                                            | 3099 | 3090787 | 3092949 | 81.40610546 | 97.826087  | 1.2017  |
| Sensory box histidine kinase/response regulator                                                         | 3098 | 3092964 | 3095768 | 74.7146933  | 73.8231098 | 0.98807 |
| Response regulator                                                                                      | 3097 | 3095791 | 3096876 | 143.3179724 | 174.193548 | 1.21543 |
| Methionine ABC transporter ATP-binding protein                                                          | 3096 | 3096873 | 3097592 | 129.3463143 | 84.4923505 | 0.65323 |
| Methionine ABC transporter permease protein                                                             | 3095 | 3097585 | 3098250 | 109.7744361 | 91.3533835 | 0.83219 |
| Methionine ABC transporter substrate-binding protein                                                    | 3094 | 3098350 | 3099144 | 981.1083123 | 1005.98237 | 1.02535 |
| hypothetical protein                                                                                    | 3093 | 3099231 | 3099350 | 823.5294118 | 718.487395 | 0.87245 |
| hypothetical protein                                                                                    | 3092 | 3099484 | 3099840 | 585.6741573 | 733.146067 | 1.2518  |
| 5-formyltetrahydrofolate cyclo-ligase (EC 6.3.3.2)                                                      | 3091 | 3099842 | 3100429 | 65.58773424 | 80.4940375 | 1.22727 |
| Predicted ATPase (AAA+ superfamily)                                                                     | 3090 | 3100482 | 3101792 | 47.32824427 | 39.5038168 | 0.83468 |
| Proline/sodium symporter PutP (TC 2.A.21.2.1) @                                                         |      |         |         |             |            |         |
| Propionate/sodium symporter                                                                             | 3089 | 3101910 | 3103475 | 293.2907348 | 309.105431 | 1.05392 |
| hypothetical protein                                                                                    | 3087 | 3103549 | 3104136 | 214.6507666 | 229.982964 | 1.07143 |
| Aspartate aminotransferase (EC 2.6.1.1)                                                                 | 3088 | 3104094 | 3105320 | 168.8417618 | 209.216966 | 1.23913 |
| hypothetical protein                                                                                    | 3086 | 3105317 | 3106858 | 48.99415964 | 29.201817  | 0.59603 |
| L-fucose mutarotase                                                                                     | 3085 | 3106958 | 3107392 | 197.0046083 | 197.004608 | 1       |
| L-fucose isomerase (EC 5.3.1.25)                                                                        | 3084 | 3107421 | 3109235 | 889.7464168 | 738.009923 | 0.82946 |
| Probable glycolate oxidase                                                                              | 3083 | 3109295 | 3110185 | 157.8651685 | 113.764045 | 0.72064 |
| Phenylacetic acid degradation protein paal                                                              | 3081 | 3110527 | 3110949 | 158.7677725 | 154.620853 | 0.97388 |
| tolB protein precursor, periplasmic protein involved in the tonb-independent uptake of group A colicins | 3080 | 3111022 | 3111903 | 344.4948922 | 332.009081 | 0.96376 |
| HtrA protease/chaperone protein                                                                         | 3078 | 3111922 | 3113910 | 186.6197183 | 201.458753 | 1.07951 |
| ClpB protein                                                                                            | 3079 | 3113907 | 3116516 | 212.6965861 | 229.574223 | 1.07935 |
| hypothetical protein                                                                                    | 3076 | 3116628 | 3117638 | 159.4059406 | 180.445545 | 1.13199 |

|                                                                                  |      |         |         |             |            |         |
|----------------------------------------------------------------------------------|------|---------|---------|-------------|------------|---------|
| Undecaprenyl-phosphate N-acetylglucosaminyl 1-phosphate transferase (EC 2.7.8.-) | 3077 | 3117635 | 3118723 | 152.1139706 | 157.169118 | 1.03323 |
| Polysialic acid transport protein kpsD precursor                                 | 3075 | 3118739 | 3120226 | 128.7827841 | 133.154001 | 1.03394 |
| Fic family protein                                                               | 3074 | 3120238 | 3121356 | 140.8765653 | 124.776386 | 0.88571 |
| Tyrosine-protein kinase wzc (EC 2.7.1.112)                                       | 3073 | 3121463 | 3122500 | 92.09257473 | 101.976856 | 1.10733 |
| GDP-mannose 4,6-dehydratase (EC 4.2.1.47)                                        |      | 3122871 | 3123509 | 166.9278997 | 165.752351 | 0.99296 |
| GDP-mannose 4,6 dehydratase (EC 4.2.1.47)                                        |      | 3123525 | 3123878 | 92.06798867 | 159.348442 | 1.73077 |
| hypothetical protein                                                             | 3070 | 3124117 | 3124284 | 0           | 0          | #DIV/0! |
| hypothetical protein                                                             | 3069 | 3124659 | 3124784 | 0           | 0          | #DIV/0! |
| Glycosyltransferase                                                              |      | 3124741 | 3125220 | 19.83298539 | 32.8810021 | 1.65789 |
| Beta-1,3-glucosyltransferase                                                     |      | 3125332 | 3126210 | 10.82004556 | 5.12528474 | 0.47368 |
| Alpha-L-Rha alpha-1,3-L-rhamnosyltransferase (EC 2.4.1.-)                        | 3066 | 3126266 | 3127186 | 16.30434783 | 4.89130435 | 0.3     |
| Oligosaccharide repeat unit polymerase Wzy                                       | 3065 | 3127195 | 3128400 | 2.904564315 | 3.73443983 | 1.28571 |
| hypothetical protein                                                             | 3064 | 3128382 | 3128504 | 16.39344262 | 0          | 0       |
| Glycosyltransferase                                                              | 3063 | 3128681 | 3129877 | 8.361204013 | 5.64381271 | 0.675   |
| Flippase                                                                         | 3062 | 3129874 | 3131403 | 4.905166776 | 1.47155003 | 0.3     |
| Glycosyltransferase                                                              | 3061 | 3131393 | 3132379 | 71.5010142  | 59.3306288 | 0.82979 |
| hypothetical protein                                                             | 3060 | 3132345 | 3132581 | 4.237288136 | 0          | 0       |
| Putative glycosyltransferase                                                     | 3059 | 3132588 | 3133592 | 14.44223108 | 11.2051793 | 0.77586 |
| Putative O-antigen synthesis protein, WbyH                                       | 3058 | 3133620 | 3134885 | 32.41106719 | 30.2371542 | 0.93293 |
| UDP-glucose 4-epimerase (EC 5.1.3.2)                                             | 3057 | 3134909 | 3135772 | 21.4368482  | 20.8574739 | 0.97297 |
| hypothetical protein                                                             | 3056 | 3135769 | 3135927 | 110.7594937 | 71.2025316 | 0.64286 |
| hypothetical protein                                                             | 3054 | 3136228 | 3136341 | 22.12389381 | 0          | 0       |
| Similar to CDP-glucose 4,6-dehydratase (EC 4.2.1.45)                             | 3055 | 3136323 | 3137399 | 210.0371747 | 248.83829  | 1.18473 |
| Glucose-1-phosphate cytidyltransferase (EC 2.7.7.33)                             | 3053 | 3137371 | 3138150 | 73.81258023 | 80.872914  | 1.09565 |
| hypothetical protein                                                             | 3052 | 3138257 | 3140923 | 110.0900225 | 115.622656 | 1.05026 |
| hypothetical protein                                                             | 3051 | 3140925 | 3141539 | 333.0618893 | 282.166124 | 0.84719 |
| ABC transport protein, ATP-binding subunit                                       | 3050 | 3141536 | 3142684 | 148.5191638 | 148.954704 | 1.00293 |
| 5'-nucleotidase (EC 3.1.3.5)                                                     | 3049 | 3142718 | 3144952 | 178.8272158 | 186.324978 | 1.04193 |
| hypothetical protein                                                             | 3048 | 3144964 | 3145623 | 243.5508346 | 279.969651 | 1.14953 |
| hypothetical protein                                                             |      | 3145834 | 3145965 | 64.88549618 | 68.7022901 | 1.05882 |
| hypothetical protein                                                             | 3046 | 3145967 | 3146122 | 467.7419355 | 798.387097 | 1.7069  |
| hypothetical protein                                                             | 3045 | 3146140 | 3146820 | 97.79411765 | 92.6470588 | 0.94737 |
| ATPase                                                                           | 3044 | 3147179 | 3148414 | 148.582996  | 127.530364 | 0.85831 |
| hypothetical protein                                                             | 3043 | 3148416 | 3149261 | 122.4852071 | 109.171598 | 0.8913  |
| unknown                                                                          | 3042 | 3149258 | 3149800 | 180.8118081 | 141.143911 | 0.78061 |
| dTDP-glucose 4,6-dehydratase (EC 4.2.1.46)                                       | 3041 | 3150064 | 3151182 | 576.4758497 | 503.13059  | 0.87277 |
| dTDP-4-dehydrorhamnose reductase (EC 1.1.1.133)                                  | 3040 | 3151137 | 3152012 | 524.5714286 | 537.428571 | 1.02451 |
| dTDP-4-dehydrorhamnose 3,5-epimerase (EC 5.1.3.13)                               | 3039 | 3152025 | 3152561 | 464.5522388 | 453.358209 | 0.9759  |
| Glucose-1-phosphate thymidyltransferase (EC 2.7.7.24)                            | 3038 | 3152561 | 3153436 | 343.4285714 | 290.571429 | 0.84609 |
| hypothetical protein                                                             | 3037 | 3153433 | 3153846 | 319.6125908 | 294.188862 | 0.92045 |
| hypothetical protein                                                             | 3036 | 3153811 | 3153948 | 3.649635036 | 16.4233577 | 4.5     |
| Long-chain-fatty-acid--CoA ligase (EC 6.2.1.3)                                   | 3034 | 3154077 | 3155810 | 340.7386036 | 482.977496 | 1.41744 |



|                                                                                         |      |         |         |             |            |         |
|-----------------------------------------------------------------------------------------|------|---------|---------|-------------|------------|---------|
| Ribosomal large subunit pseudouridine synthase D (EC 4.2.1.70)                          | 3035 | 3155807 | 3156481 | 90.50445104 | 116.839763 | 1.29098 |
| Haloacid dehalogenase-like hydrolase                                                    | 3033 | 3156481 | 3157266 | 110.1910828 | 189.171975 | 1.71676 |
| Sorbitol dehydrogenase (EC 1.1.1.14)                                                    | 3032 | 3157263 | 3158294 | 106.6925315 | 196.411251 | 1.84091 |
| Acetolactate synthase large subunit (EC 2.2.1.6)                                        | 3031 | 3158316 | 3160067 | 159.0519703 | 337.949743 | 2.12478 |
| Dihydroxy-acid dehydratase (EC 4.2.1.9)                                                 | 3030 | 3160069 | 3161727 | 131.1821472 | 294.481303 | 2.24483 |
| 3-isopropylmalate dehydrogenase (EC 1.1.1.85)                                           | 3029 | 3161729 | 3162880 | 162.4674196 | 390.964379 | 2.40642 |
| 2-isopropylmalate synthase (EC 2.3.3.13)                                                | 3028 | 3162892 | 3164493 | 127.1455817 | 257.469803 | 2.025   |
| 2-isopropylmalate synthase (EC 2.3.3.13)                                                | 3027 | 3164497 | 3166035 | 280.5591678 | 580.786736 | 2.0701  |
| Ketol-acid reductoisomerase (EC 1.1.1.86)                                               | 3026 | 3166059 | 3167060 | 278.5642063 | 520.980789 | 1.87024 |
| Acetolactate synthase small subunit (EC 2.2.1.6)                                        | 3025 | 3167187 | 3167717 | 365.0943396 | 615.566038 | 1.68605 |
| Deoxyribose-phosphate aldolase (EC 4.1.2.4)                                             | 3024 | 3167839 | 3168543 | 165.4829545 | 223.721591 | 1.35193 |
| 2-keto-3-deoxy-D-arabino-heptulosonate-7-phosphate synthase I beta (EC 2.5.1.54)        | 3023 | 3168555 | 3170546 | 357.6092416 | 426.04219  | 1.19136 |
| Hypothetical NagD-like phosphatase                                                      | 3022 | 3170596 | 3171378 | 299.8721228 | 304.987212 | 1.01706 |
| hypothetical protein                                                                    | 3021 | 3171453 | 3172115 | 224.3202417 | 832.703927 | 3.71212 |
| hypothetical protein                                                                    | 3020 | 3172142 | 3172276 | 0           | 16.7910448 | #DIV/0! |
| Sua5 YciO YrdC YwC family protein                                                       | 3019 | 3172596 | 3173642 | 83.17399618 | 86.042065  | 1.03448 |
| Magnesium and cobalt transport protein CorA                                             | 3018 | 3173649 | 3174632 | 128.6876907 | 178.535097 | 1.38735 |
| hypothetical protein                                                                    | 3017 | 3174619 | 3174744 | 16          | 0          | 0       |
| Phosphoglycolate phosphatase (EC 3.1.3.18)                                              | 3015 | 3174722 | 3175351 | 38.95071542 | 25.0397456 | 0.64286 |
| Transcriptional regulator, MerR family                                                  | 3016 | 3175322 | 3175747 | 94.11764706 | 68.8235294 | 0.73125 |
| UPF0272 protein CA_C0774                                                                | 3014 | 3175748 | 3176974 | 124.7960848 | 192.699837 | 1.54412 |
| hypothetical protein                                                                    | 3013 | 3176971 | 3177396 | 150.5882353 | 254.117647 | 1.6875  |
| hypothetical protein                                                                    | 3012 | 3177402 | 3178058 | 109.7560976 | 113.185976 | 1.03125 |
| hypothetical protein                                                                    | 3010 | 3178057 | 3178203 | 41.09589041 | 46.2328767 | 1.125   |
| HAD-superfamily hydrolase, subfamily IA, variant 3 protein family                       | 3011 | 3178173 | 3178850 | 69.4239291  | 73.1166913 | 1.05319 |
| Thiamin-phosphate pyrophosphorylase (EC 2.5.1.3)                                        | 3009 | 3178860 | 3179486 | 141.3738019 | 125.798722 | 0.88983 |
| Predicted hydroxymethylpyrimidine transporter CytX                                      | 3008 | 3179479 | 3180645 | 116.6380789 | 71.3979417 | 0.61213 |
| hypothetical protein                                                                    | 3007 | 3180858 | 3181601 | 72.67833109 | 105.989233 | 1.45833 |
| Spermidine Putrescine transport ATP-binding protein potA (TC_3.A.1.11.1)                | 3006 | 3181682 | 3182815 | 76.34598411 | 67.5198588 | 0.88439 |
| Spermidine Putrescine ABC transporter permease component potB (TC_3.A.1.11.1)           | 3005 | 3182812 | 3183687 | 63.42857143 | 20.5714286 | 0.32432 |
| Spermidine Putrescine ABC transporter permease component potC (TC_3.A.1.11.1)           | 3004 | 3183684 | 3184496 | 67.1182266  | 49.8768473 | 0.74312 |
| ABC transporter, periplasmic spermidine putrescine-binding protein potD (TC_3.A.1.11.1) | 3003 | 3184493 | 3185554 | 186.1451461 | 129.359095 | 0.69494 |
| Methyl-accepting chemotaxis protein                                                     | 3001 | 3185597 | 3187789 | 137.7737226 | 103.672445 | 0.75248 |
| amidohydrolase family protein                                                           | 3002 | 3187776 | 3188555 | 82.79845956 | 72.2079589 | 0.87209 |
| membrane protein, putative                                                              | 3000 | 3188560 | 3189438 | 92.82460137 | 105.068337 | 1.1319  |
| Branched-chain amino acid aminotransferase (EC 2.6.1.42)                                | 2999 | 3189533 | 3190621 | 164.0625    | 161.305147 | 0.98319 |
| hypothetical protein                                                                    | 2998 | 3190678 | 3191970 | 56.50154799 | 57.4690402 | 1.01712 |
| Glycosyltransferase                                                                     | 2997 | 3191990 | 3193126 | 71.3028169  | 75.2640845 | 1.05556 |

|                                                                                                                                                                                   |      |         |         |             |            |         |
|-----------------------------------------------------------------------------------------------------------------------------------------------------------------------------------|------|---------|---------|-------------|------------|---------|
| hypothetical protein                                                                                                                                                              | 2996 | 3193198 | 3193521 | 583.5913313 | 626.934985 | 1.07427 |
| PTS system, fructose-specific IIA component (EC 2.7.1.69) / PTS system, fructose-specific IIB component (EC 2.7.1.69) / PTS system, fructose-specific IIC component (EC 2.7.1.69) | 2995 | 3193592 | 3194074 | 147.3029046 | 214.73029  | 1.45775 |
| Type I restriction-modification system, DNA-methyltransferase subunit M (EC 2.1.1.72)                                                                                             | 2994 | 3194120 | 3196042 | 9.365244537 | 3.5119667  | 0.375   |
| Beta-glucosidase (EC 3.2.1.21)                                                                                                                                                    | 2992 | 3196291 | 3198411 | 229.9528302 | 238.79717  | 1.03846 |
| hypothetical protein                                                                                                                                                              | 2991 | 3198530 | 3199033 | 212.7236581 | 254.970179 | 1.1986  |
| Homoserine O-succinyltransferase (EC 2.3.1.46)                                                                                                                                    | 2990 | 3199046 | 3199966 | 366.3043478 | 366.847826 | 1.00148 |
| O-acetylhomoserine sulfhydrylase (EC 4.2.99.10) / O-succinylhomoserine sulfhydrylase (EC 4.2.99.9)                                                                                | 2989 | 3200079 | 3201362 | 664.9726349 | 478.498827 | 0.71958 |
| hypothetical protein                                                                                                                                                              | 2988 | 3201792 | 3201938 | 0           | 0          | #DIV/0! |
| hypothetical protein                                                                                                                                                              | 2987 | 3202500 | 3202706 | 4.854368932 | 0          | 0       |
| hypothetical protein                                                                                                                                                              | 2985 | 3202735 | 3203142 | 15.97051597 | 0          | 0       |
| hypothetical protein                                                                                                                                                              | 2986 | 3203139 | 3203774 | 41.73228346 | 24.8031496 | 0.59434 |
| Sensory box histidine kinase                                                                                                                                                      | 2984 | 3203998 | 3205086 | 107.0772059 | 35.15625   | 0.32833 |
| DNA-binding response regulator, LuxR family                                                                                                                                       | 2983 | 3205136 | 3205741 | 38.84297521 | 22.3140496 | 0.57447 |
| Rubrerythrin                                                                                                                                                                      | 2982 | 3205810 | 3206352 | 525.8302583 | 552.121771 | 1.05    |
| sensory box histidine kinase/response regulator                                                                                                                                   | 2981 | 3206447 | 3209500 | 37.01277432 | 25.7943007 | 0.6969  |
| HDIG domain protein                                                                                                                                                               | 2980 | 3209504 | 3210100 | 176.1744966 | 120.805369 | 0.68571 |
| tRNA (5-methylaminomethyl-2-thiouridylate)-methyltransferase (EC 2.1.1.61)                                                                                                        | 2978 | 3210124 | 3211179 | 54.50236967 | 42.6540284 | 0.78261 |
| Biotin synthase and related enzymes                                                                                                                                               | 2979 | 3211169 | 3212191 | 38.64970646 | 30.8219178 | 0.79747 |
| Thiazole biosynthesis protein ThiH                                                                                                                                                | 2977 | 3212184 | 3213608 | 45.99719101 | 47.4016854 | 1.03053 |
| Gamma-glutamyl phosphate reductase (EC 1.2.1.41)                                                                                                                                  | 2976 | 3213605 | 3213874 | 57.62081784 | 41.8215613 | 0.72581 |
| Aspartate ammonia-lyase (EC 4.3.1.1)                                                                                                                                              | 2975 | 3214025 | 3215344 | 55.72403336 | 34.1167551 | 0.61224 |
| Flavodoxin                                                                                                                                                                        | 2974 | 3215344 | 3215823 | 99.16492693 | 84.5511482 | 0.85263 |
| Putative GTP-binding protien TM0445                                                                                                                                               | 2973 | 3215820 | 3217040 | 72.54098361 | 62.704918  | 0.86441 |
| Multidrug resistance ABC transporter ATP-binding and permease protein                                                                                                             | 2971 | 3217092 | 3218876 | 45.81225408 | 31.618887  | 0.69018 |
| Glutaminase A                                                                                                                                                                     | 2972 | 3218842 | 3220944 | 25.45195052 | 14.9857279 | 0.58879 |
| Sugar ABC transporter, sugar permease protein 2 USSDB1D                                                                                                                           | 2970 | 3220945 | 3221778 | 22.80912365 | 2.70108043 | 0.11842 |
| N-Acetyl-D-glucosamine ABC transport system, permease protein 1                                                                                                                   | 2969 | 3221775 | 3222677 | 18.29268293 | 12.4722838 | 0.68182 |
| N-Acetyl-D-glucosamine ABC transport system, sugar-binding protein                                                                                                                | 2968 | 3222788 | 3224161 | 174.4355426 | 155.680991 | 0.89248 |
| Beta-galactosidase (EC 3.2.1.23)                                                                                                                                                  | 2967 | 3224397 | 3226199 | 44.39511654 | 34.9611543 | 0.7875  |
| hypothetical protein                                                                                                                                                              | 2966 | 3226196 | 3227131 | 26.73796791 | 12.0320856 | 0.45    |
| Methionine ABC transporter ATP-binding protein                                                                                                                                    | 2965 | 3227149 | 3227976 | 79.80652963 | 54.4135429 | 0.68182 |
| ABC transporter                                                                                                                                                                   | 2964 | 3227973 | 3228875 | 94.44444444 | 77.5       | 0.82059 |
| ABC transporter substrate-binding protein                                                                                                                                         | 2963 | 3228897 | 3229907 | 293.0693069 | 298.514851 | 1.01858 |
| Glutamine synthetase type III, GlnN (EC 6.3.1.2)                                                                                                                                  | 2961 | 3230164 | 3232305 | 197.1830986 | 45.4225352 | 0.23036 |
| Transposase subunit                                                                                                                                                               | 2960 | 3232851 | 3233201 | 17.14285714 | 0          | 0       |
| hypothetical protein                                                                                                                                                              | 2959 | 3233667 | 3234209 | 194.6494465 | 286.439114 | 1.47156 |

|                                                                                           |      |         |         |             |            |         |
|-------------------------------------------------------------------------------------------|------|---------|---------|-------------|------------|---------|
| hypothetical protein                                                                      | 2958 | 3234379 | 3234537 | 15.82278481 | 0          | 0       |
| Nitrogen regulatory protein P-II                                                          | 2957 | 3234547 | 3234888 | 58.65102639 | 65.9824047 | 1.125   |
| Ammonium transporter                                                                      | 2956 | 3234901 | 3236262 | 71.27112417 | 49.5958854 | 0.69588 |
| hypothetical protein                                                                      | 2954 | 3236397 | 3236546 | 13.42281879 | 0          | 0       |
| Mo/Fe-nitrogenase-specific transcriptional regulator NifA                                 | 2955 | 3236525 | 3238111 | 130.8322825 | 137.61034  | 1.05181 |
| hypothetical protein                                                                      | 2952 | 3238284 | 3239126 | 228.0285036 | 229.809976 | 1.00781 |
| no significant homology.                                                                  | 2951 | 3239128 | 3239388 | 51.92307692 | 60.5769231 | 1.16667 |
| hypothetical protein                                                                      | 2950 | 3239563 | 3239718 | 109.6774194 | 188.709677 | 1.72059 |
| Aminomethyltransferase (glycine cleavage system T protein) (EC 2.1.2.10)                  | 2949 | 3239784 | 3240872 | 85.01838235 | 39.2922794 | 0.46216 |
| Glycine cleavage system H protein                                                         | 2948 | 3240902 | 3241273 | 87.60107817 | 42.4528302 | 0.48462 |
| Glycine dehydrogenase [decarboxylating] (glycine cleavage system P1 protein) (EC 1.4.4.2) | 2947 | 3241283 | 3242605 | 92.66263238 | 39.1452345 | 0.42245 |
| Glycine dehydrogenase [decarboxylating] (glycine cleavage system P2 protein) (EC 1.4.4.2) | 2946 | 3242602 | 3244017 | 130.7420495 | 50.8833922 | 0.38919 |
| hesA/moeB/thiF family protein                                                             | 2945 | 3244036 | 3244860 | 104.9757282 | 73.7257282 | 0.70231 |
| tRNA(Cytosine32)-2-thiocytidine synthetase                                                | 2944 | 3244857 | 3245621 | 51.70157068 | 32.395288  | 0.62658 |
| Deoxyribonuclease TatD                                                                    | 2943 | 3245623 | 3246408 | 64.96815287 | 48.7261146 | 0.75    |
| COGs COG3146                                                                              | 2942 | 3246411 | 3247571 | 34.9137931  | 13.5775862 | 0.38889 |
| Hydantoinase                                                                              | 2941 | 3247579 | 3249687 | 66.17647059 | 65.1091082 | 0.98387 |
| Purine nucleoside phosphorylase (EC 2.4.2.1)                                              | 2940 | 3249729 | 3250433 | 264.9147727 | 194.957386 | 0.73592 |
| hypothetical protein                                                                      | 2938 | 3251326 | 3252474 | 137.630662  | 150.914634 | 1.09652 |
| putative protein                                                                          | 2937 | 3252486 | 3254195 | 56.1732007  | 36.863663  | 0.65625 |
| hypothetical protein                                                                      | 2936 | 3254441 | 3254605 | 0           | 0          | #DIV/0! |
| hypothetical protein                                                                      | 2935 | 3254705 | 3255988 | 26.50038971 | 24.5518316 | 0.92647 |
| Heat shock protein htpG                                                                   | 2934 | 3255981 | 3257549 | 22.64030612 | 18.6543367 | 0.82394 |
| Fe-S oxidoreductase                                                                       | 2933 | 3257546 | 3259501 | 19.69309463 | 6.90537084 | 0.35065 |
| hypothetical protein                                                                      |      | 3259959 | 3260351 | 66.32653061 | 45.9183673 | 0.69231 |
| hypothetical protein                                                                      |      | 3260364 | 3261482 | 66.63685152 | 42.2629696 | 0.63423 |
| hypothetical protein                                                                      | 2930 | 3261486 | 3261647 | 37.26708075 | 13.9751553 | 0.375   |
| Hypothetical similar to thiamin biosynthesis lipoprotein ApbE                             | 2929 | 3261655 | 3262680 | 129.7560976 | 153.658537 | 1.18421 |
| 3-polyprenyl-4-hydroxybenzoate carboxy-lyase (EC 4.1.1.-)                                 | 2928 | 3262698 | 3264152 | 128.954608  | 100.584594 | 0.78    |
| 4-hydroxybenzoate polyprenyltransferase (EC 2.5.1.-)                                      | 2927 | 3264142 | 3265005 | 79.37427578 | 31.2862109 | 0.39416 |
| 3-polyprenyl-4-hydroxybenzoate carboxy-lyase UbiX (EC 4.1.1.-)                            | 2926 | 3265018 | 3265587 | 63.26889279 | 71.1775044 | 1.125   |
| thiamine biosynthesis protein, putative                                                   | 2925 | 3265590 | 3266528 | 93.28358209 | 57.5692964 | 0.61714 |
| Taurine transport ATP-binding protein tauB                                                | 2924 | 3266522 | 3267277 | 65.56291391 | 41.7218543 | 0.63636 |
| Taurine transport system permease protein tauC                                            | 2923 | 3267274 | 3268029 | 65.56291391 | 44.7019868 | 0.68182 |
| hypothetical protein                                                                      | 2922 | 3268050 | 3268268 | 20.64220183 | 10.3211009 | 0.5     |
| hypothetical protein                                                                      | 2921 | 3268256 | 3268399 | 13.98601399 | 0          | 0       |
| hypothetical protein                                                                      | 2920 | 3268581 | 3269561 | 726.0204082 | 941.326531 | 1.29656 |
| Fumarate reductase flavoprotein subunit (EC 1.3.99.1)                                     | 2919 | 3269635 | 3270006 | 1289.757412 | 1024.93261 | 0.79467 |
| hypothetical protein                                                                      | 2918 | 3269984 | 3270355 | 500         | 557.951482 | 1.1159  |
| hypothetical protein                                                                      | 2917 | 3270393 | 3270566 | 150.2890173 | 65.0289017 | 0.43269 |

|                                                                                                                                                                                   |      |         |         |             |            |         |
|-----------------------------------------------------------------------------------------------------------------------------------------------------------------------------------|------|---------|---------|-------------|------------|---------|
| Fumarate reductase flavoprotein subunit (EC 1.3.99.1)                                                                                                                             | 2916 | 3270866 | 3272656 | 2734.636872 | 2255.02793 | 0.82462 |
| Integrase domain protein                                                                                                                                                          | 2915 | 3272902 | 3274137 | 53.03643725 | 12.7530364 | 0.24046 |
| Ferredoxin                                                                                                                                                                        | 2914 | 3274324 | 3275586 | 494.0570523 | 1565.37242 | 3.1684  |
| hypothetical protein                                                                                                                                                              | 2912 | 3275605 | 3275751 | 30.82191781 | 15.4109589 | 0.5     |
| putative membrane protein                                                                                                                                                         |      | 3275626 | 3276528 | 29.37915743 | 54.8780488 | 1.86792 |
| Uncharacterized protein TP_1032                                                                                                                                                   | 2911 | 3276604 | 3276987 | 65.27415144 | 82.2454308 | 1.26    |
| Heptaprenyl diphosphate synthase component I (EC 2.5.1.30)                                                                                                                        |      | 3276950 | 3277552 | 107.1428571 | 160.714286 | 1.5     |
| membrane protein, putative                                                                                                                                                        |      | 3277549 | 3278193 | 65.2173913  | 80.3571429 | 1.23214 |
| hypothetical protein                                                                                                                                                              | 2909 | 3278171 | 3278479 | 457.7922078 | 336.038961 | 0.73404 |
| hypothetical protein                                                                                                                                                              | 2907 | 3278704 | 3279609 | 175.6906077 | 273.480663 | 1.5566  |
| Putative pheromone precursor lipoprotein                                                                                                                                          | 2906 | 3279773 | 3280543 | 1113.636364 | 2013.31169 | 1.80787 |
| NADH dehydrogenase (EC 1.6.99.3) in cluster with putative pheromone precursor                                                                                                     | 2905 | 3280562 | 3282520 | 611.8488253 | 1188.20225 | 1.94199 |
| Heptaprenyl diphosphate synthase component II (EC 2.5.1.30)                                                                                                                       | 2904 | 3282536 | 3283501 | 207.253886  | 324.093264 | 1.56375 |
| Riboflavin kinase (EC 2.7.1.26) / FMN adenylyltransferase (EC 2.7.7.2)                                                                                                            | 2903 | 3283509 | 3284297 | 93.27411168 | 142.766497 | 1.53061 |
| Sensory box histidine kinase/response regulator                                                                                                                                   | 2902 | 3284354 | 3286660 | 52.19660722 | 88.0817747 | 1.6875  |
| Beta-galactosidase (EC 3.2.1.23)                                                                                                                                                  | 2901 | 3286684 | 3288735 | 39.98049732 | 12.0672843 | 0.30183 |
| hypothetical protein                                                                                                                                                              | 2900 | 3288748 | 3289989 | 49.55680902 | 27.1958098 | 0.54878 |
| hypothetical protein                                                                                                                                                              | 2899 | 3290006 | 3291247 | 14.9073328  | 0          | 0       |
| L-threonine 3-dehydrogenase (EC 1.1.1.103)                                                                                                                                        | 2898 | 3291261 | 3292292 | 29.09796314 | 0          | 0       |
| N-Acetyl-D-glucosamine ABC transport system, sugar-binding protein                                                                                                                | 2897 | 3292345 | 3293646 | 29.20830131 | 17.2943889 | 0.59211 |
| Predicted beta-xyloside ABC transporter, permease component                                                                                                                       | 2896 | 3293713 | 3294606 | 30.79507279 | 7.55879059 | 0.24545 |
| Multiple sugar ABC transporter, membrane-spanning permease protein MsmG                                                                                                           | 2895 | 3294616 | 3295449 | 19.20768307 | 0          | 0       |
| hypothetical protein                                                                                                                                                              | 2894 | 3295784 | 3295963 | 11.17318436 | 0          | 0       |
| Myo-inositol 2-dehydrogenase (EC 1.1.1.18)                                                                                                                                        | 2893 | 3296023 | 3297123 | 29.09090909 | 12.2727273 | 0.42188 |
| Xylose isomerase domain protein TIM barrel precursor                                                                                                                              | 2892 | 3297139 | 3297999 | 23.8372093  | 20.9302326 | 0.87805 |
| Xylose repressor XylR (ROK family)                                                                                                                                                | 2891 | 3298151 | 3299374 | 66.23058054 | 53.3524121 | 0.80556 |
| Possible D-erythrose 4-phosphate dehydrogenase EryC (EC 1.1.1.-)                                                                                                                  | 2890 | 3299442 | 3300338 | 77.56696429 | 42.6897321 | 0.55036 |
| Galactitol-1-phosphate 5-dehydrogenase (EC 1.1.1.251)                                                                                                                             | 2889 | 3300344 | 3301402 | 71.3610586  | 55.2930057 | 0.77483 |
| Sorbitol dehydrogenase (EC 1.1.1.14)                                                                                                                                              | 2888 | 3301399 | 3302442 | 124.1610738 | 110.019175 | 0.8861  |
| Ribulose-phosphate 3-epimerase (EC 5.1.3.1)                                                                                                                                       | 2886 | 3302444 | 3303115 | 153.5022355 | 177.719821 | 1.15777 |
| hypothetical protein                                                                                                                                                              | 2887 | 3303112 | 3303981 | 169.735328  | 243.383199 | 1.4339  |
| PTS system, fructose-specific IIA component (EC 2.7.1.69) / PTS system, fructose-specific IIB component (EC 2.7.1.69) / PTS system, fructose-specific IIC component (EC 2.7.1.69) | 2885 | 3304041 | 3304487 | 1012.331839 | 1079.59641 | 1.06645 |
| hypothetical protein                                                                                                                                                              | 2884 | 3304499 | 3305689 | 594.9579832 | 709.033613 | 1.19174 |
| hypothetical protein                                                                                                                                                              | 2883 | 3305737 | 3307602 | 68.63270777 | 50.6702413 | 0.73828 |
| pilT protein, putative                                                                                                                                                            |      | 3307644 | 3308330 | 477.4052478 | 245.991254 | 0.51527 |
| D-3-phosphoglycerate dehydrogenase (EC 1.1.1.95)                                                                                                                                  | 2881 | 3308376 | 3309554 | 2071.731749 | 353.353141 | 0.17056 |

|                                                                                    |      |         |         |             |            |         |
|------------------------------------------------------------------------------------|------|---------|---------|-------------|------------|---------|
| Phosphoserine aminotransferase (EC 2.6.1.52)                                       | 2880 | 3309588 | 3310691 | 1266.092475 | 242.747053 | 0.19173 |
| Redox-sensitive transcriptional regulator (AT-rich DNA-binding protein)            | 2879 | 3310743 | 3311315 | 899.4755245 | 212.412587 | 0.23615 |
| hypothetical protein                                                               | 2878 | 3311406 | 3311519 | 13.27433628 | 0          | 0       |
| hypothetical protein                                                               | 2877 | 3311569 | 3311682 | 8.849557522 | 0          | 0       |
| motif=sugar transport proteins signatures                                          | 2876 | 3311826 | 3312206 | 125         | 159.868421 | 1.27895 |
| hypothetical protein                                                               | 2875 | 3312199 | 3312645 | 458.5201794 | 554.932735 | 1.21027 |
| Enolase (EC 4.2.1.11)                                                              | 2874 | 3312753 | 3314054 | 1434.63035  | 1943.57977 | 1.35476 |
| Propanediol utilization transcriptional activator                                  | 2873 | 3314131 | 3315003 | 52.17889908 | 36.1238532 | 0.69231 |
| hypothetical protein                                                               | 2872 | 3315094 | 3316113 | 23.55250245 | 2.20804711 | 0.09375 |
| hypothetical protein                                                               | 2871 | 3316271 | 3317095 | 76.45631068 | 98.3009709 | 1.28571 |
| hypothetical protein                                                               | 2869 | 3317104 | 3318891 | 136.8214885 | 123.391158 | 0.90184 |
| Exonuclease SbcC                                                                   | 2870 | 3318881 | 3322039 | 37.68207726 | 29.2115263 | 0.77521 |
| Exonuclease SbcD                                                                   | 2868 | 3322036 | 3323220 | 46.03040541 | 19.0033784 | 0.41284 |
| L-fuconolactone hydrolase                                                          | 2867 | 3323529 | 3324383 | 42.15456674 | 15.8079625 | 0.375   |
| ABC transporter, ATP-binding/permease protein                                      |      | 3324421 | 3325164 | 21.53432032 | 0          | 0       |
| ABC transporter, ATP-binding protein, MsbA family                                  |      | 3325372 | 3325899 | 23.71916509 | 0          | 0       |
| hypothetical protein                                                               | 2864 | 3326083 | 3326202 | 16.80672269 | 0          | 0       |
| uncharacterized conserved secreted protein                                         | 2863 | 3326210 | 3328531 | 121.068505  | 112.45153  | 0.92883 |
| Uncharacterized protein TP_0480                                                    | 2862 | 3328542 | 3329078 | 72.76119403 | 79.7574627 | 1.09615 |
| TPR domain protein, putative component of TonB system                              | 2861 | 3329134 | 3330519 | 177.6173285 | 154.33213  | 0.8689  |
| 5'-nucleotidase (EC 3.1.3.5)                                                       | 2860 | 3330619 | 3331647 | 599.2217899 | 420.233463 | 0.7013  |
| soluble lytic murein transglycosylase, putative                                    | 2859 | 3331892 | 3333865 | 39.02686265 | 35.3522554 | 0.90584 |
| hypothetical protein                                                               | 2858 | 3333907 | 3334281 | 46.79144385 | 78.2085561 | 1.67143 |
| Cell division protein ftsK                                                         | 2857 | 3334519 | 3336729 | 111.7647059 | 91.6289593 | 0.81984 |
| diguanylate cyclase/phosphodiesterase (GGDEF & EAL domains) with PAS/PAC sensor(s) | 2856 | 3336747 | 3338282 | 51.79153094 | 21.9869707 | 0.42453 |
| hypothetical protein                                                               | 2855 | 3338409 | 3338924 | 164.0776699 | 96.1165049 | 0.5858  |
| ATP synthase A chain (EC 3.6.3.14)                                                 | 2854 | 3338950 | 3339711 | 53.21944809 | 35.4796321 | 0.66667 |
| ATP synthase C chain (EC 3.6.3.14)                                                 | 2853 | 3339753 | 3339971 | 245.412844  | 196.100917 | 0.79907 |
| ATP synthase B chain (EC 3.6.3.14)                                                 | 2852 | 3339981 | 3340490 | 154.2239686 | 141.453831 | 0.9172  |
| ATP synthase delta chain (EC 3.6.3.14)                                             | 2851 | 3340491 | 3341027 | 139.9253731 | 125.932836 | 0.9     |
| ATP synthase alpha chain (EC 3.6.3.14)                                             | 2850 | 3341027 | 3342529 | 149.3333333 | 109.5      | 0.73326 |
| ATP synthase gamma chain (EC 3.6.3.14)                                             | 2849 | 3342539 | 3343450 | 142.1514819 | 121.020856 | 0.85135 |
| ATP synthase beta chain (EC 3.6.3.14)                                              | 2848 | 3343466 | 3344851 | 271.8411552 | 250.180505 | 0.92032 |
| ATP synthase epsilon chain (EC 3.6.3.14)                                           | 2847 | 3344860 | 3345285 | 171.7647059 | 127.058824 | 0.73973 |
| NAD synthetase (EC 6.3.1.5) / Glutamine amidotransferase chain of NAD synthetase   | 2846 | 3345328 | 3347079 | 155.6253569 | 125.928041 | 0.80917 |
| Ubiquitin-protein ligase                                                           | 2845 | 3347419 | 3348816 | 11.45311382 | 8.05297065 | 0.70313 |
| Nitroreductase family protein                                                      | 2844 | 3348824 | 3349330 | 74.11067194 | 31.1264822 | 0.42    |
| GTP-binding protein HflX                                                           | 2843 | 3349352 | 3350623 | 178.992919  | 166.404406 | 0.92967 |
| Cell division protein ftsK                                                         | 2842 | 3350738 | 3353305 | 122.3217764 | 119.205298 | 0.97452 |
| Membrane proteins related to metalloendopeptidases                                 | 2841 | 3353326 | 3354294 | 93.49173554 | 97.6239669 | 1.0442  |
| hypothetical protein                                                               | 2840 | 3354315 | 3354869 | 141.6967509 | 150.270758 | 1.06051 |



|                                                                                                                                                                                                  |      |         |         |             |            |         |
|--------------------------------------------------------------------------------------------------------------------------------------------------------------------------------------------------|------|---------|---------|-------------|------------|---------|
| Octaprenyl-diphosphate synthase (EC 2.5.1.-) /<br>Dimethylallyltransferase (EC 2.5.1.1) /<br>Geranyltranstransferase (EC 2.5.1.10) /<br>Geranylgeranyl pyrophosphate synthetase (EC<br>2.5.1.29) | 2839 | 3354879 | 3355961 | 108.5951941 | 62.3844732 | 0.57447 |
| Cell division protein ftsJ                                                                                                                                                                       | 2837 | 3356009 | 3356647 | 60.34482759 | 63.4796238 | 1.05195 |
| Maebi                                                                                                                                                                                            | 2838 | 3356644 | 3357429 | 115.2866242 | 154.77707  | 1.34254 |
| Uncharacterized protein TP_0021                                                                                                                                                                  | 2836 | 3357446 | 3359569 | 72.77437588 | 82.6660386 | 1.13592 |
| DNA repair helicase                                                                                                                                                                              | 2835 | 3359566 | 3361287 | 109.5293434 | 129.430564 | 1.1817  |
| Sulfate permease                                                                                                                                                                                 | 2834 | 3361430 | 3363109 | 78.02263252 | 92.4657534 | 1.18511 |
| 2-dehydropantoate 2-reductase (EC 1.1.1.169)                                                                                                                                                     | 2833 | 3363106 | 3364035 | 71.58234661 | 89.6124865 | 1.25188 |
| Thymidylate synthase (EC 2.1.1.45)                                                                                                                                                               | 2832 | 3364032 | 3364781 | 67.42323097 | 81.1081442 | 1.20297 |
| Putative high-affinity iron permease                                                                                                                                                             | 2831 | 3364985 | 3366196 | 39.223782   | 16.7217176 | 0.42632 |
| Periplasmic protein p19 involved in high-affinity<br>Fe2+ transport                                                                                                                              | 2830 | 3366211 | 3366795 | 63.35616438 | 73.2020548 | 1.15541 |
| Putative high-affinity iron permease                                                                                                                                                             | 2829 | 3366796 | 3368055 | 28.19698173 | 25.019857  | 0.88732 |
| ABC transporter permease protein                                                                                                                                                                 | 2828 | 3368064 | 3369329 | 37.1541502  | 7.11462451 | 0.19149 |
| ABC transporter permease protein                                                                                                                                                                 | 2827 | 3369319 | 3370488 | 31.65098375 | 9.62360992 | 0.30405 |
| Putative ABC transport system ATP-binding<br>protein                                                                                                                                             | 2826 | 3370491 | 3371162 | 52.1609538  | 16.7660209 | 0.32143 |
| Putative pheromone precursor lipoprotein                                                                                                                                                         | 2825 | 3371159 | 3371566 | 17.1990172  | 11.0565111 | 0.64286 |
| Transposase, IS4                                                                                                                                                                                 | 2824 | 3371730 | 3372587 | 71.76196033 | 68.2613769 | 0.95122 |
| hypothetical protein                                                                                                                                                                             | 2823 | 3372770 | 3372994 | 0           | 20.0892857 | #DIV/0! |
| hypothetical protein                                                                                                                                                                             | 2822 | 3372995 | 3373291 | 3.378378378 | 0          | 0       |
| hypothetical protein                                                                                                                                                                             | 2821 | 3373311 | 3373454 | 13.98601399 | 31.4685315 | 2.25    |
| Uncharacterized protein MJ1673                                                                                                                                                                   | 2820 | 3373476 | 3373874 | 64.07035176 | 33.919598  | 0.52941 |
| M. jannaschii predicted coding region MJ1674                                                                                                                                                     | 2819 | 3373850 | 3375172 | 27.23146747 | 15.3177005 | 0.5625  |
| hypothetical protein                                                                                                                                                                             | 2818 | 3375191 | 3376255 | 82.23684211 | 63.4398496 | 0.77143 |
| hypothetical protein                                                                                                                                                                             | 2817 | 3376257 | 3376631 | 46.79144385 | 48.1283422 | 1.02857 |
| putative protein                                                                                                                                                                                 | 2816 | 3376640 | 3377533 | 118.7010078 | 75.5879059 | 0.63679 |
| hypothetical protein                                                                                                                                                                             | 2815 | 3377546 | 3378529 | 91.04781282 | 91.5564598 | 1.00559 |
| hypothetical protein                                                                                                                                                                             | 2814 | 3378533 | 3381004 | 78.10602995 | 74.6661271 | 0.95596 |
| hypothetical protein                                                                                                                                                                             | 2813 | 3381001 | 3382104 | 132.819583  | 101.99456  | 0.76792 |
| hypothetical protein                                                                                                                                                                             | 2812 | 3382105 | 3383028 | 117.0097508 | 95.0704225 | 0.8125  |
| hypothetical protein                                                                                                                                                                             | 2811 | 3383211 | 3383339 | 703.125     | 1072.26563 | 1.525   |
| CRISPR-associated protein Cas1                                                                                                                                                                   | 2810 | 3384752 | 3385768 | 17.22440945 | 8.85826772 | 0.51429 |
| CRISPR-associated protein Cas2                                                                                                                                                                   | 2809 | 3385765 | 3386040 | 60          | 24.5454545 | 0.40909 |
| hypothetical protein                                                                                                                                                                             | 2808 | 3386532 | 3386726 | 18.04123711 | 0          | 0       |
| all_bases.cand.99 - score = 69.41, potential<br>signal peptide                                                                                                                                   |      | 3386765 | 3387514 | 5.340453939 | 0          | 0       |
| hypothetical protein                                                                                                                                                                             | 2806 | 3387532 | 3388143 | 14.7299509  | 11.0474632 | 0.75    |
| hypothetical protein                                                                                                                                                                             | 2805 | 3388157 | 3388465 | 21.1038961  | 7.30519481 | 0.34615 |
| hypothetical protein                                                                                                                                                                             | 2804 | 3388453 | 3389649 | 15.05016722 | 7.52508361 | 0.5     |
| Transcriptional regulator, DeoR family                                                                                                                                                           |      | 3389730 | 3390425 | 15.10791367 | 12.9496403 | 0.85714 |
| hypothetical protein                                                                                                                                                                             | 2802 | 3390536 | 3390811 | 14.54545455 | 0          | 0       |
| Radical SAM domain heme biosynthesis protein                                                                                                                                                     | 2801 | 3390970 | 3391896 | 25.91792657 | 7.28941685 | 0.28125 |
| hypothetical protein                                                                                                                                                                             | 2800 | 3391922 | 3392932 | 28.21782178 | 13.3663366 | 0.47368 |
| Radical SAM domain protein                                                                                                                                                                       | 2799 | 3392935 | 3393759 | 25.48543689 | 10.9223301 | 0.42857 |
| Dihydropyrimidine dehydrogenase [NADP+] (EC<br>1.3.1.2)                                                                                                                                          | 2798 | 3393770 | 3394954 | 35.05067568 | 7.60135135 | 0.21687 |
| hypothetical protein                                                                                                                                                                             | 2797 | 3395113 | 3395757 | 34.16149068 | 13.9751553 | 0.40909 |

|                                                                                                                                                                       |      |         |         |             |            |         |
|-----------------------------------------------------------------------------------------------------------------------------------------------------------------------|------|---------|---------|-------------|------------|---------|
| unknown                                                                                                                                                               | 2796 | 3395831 | 3396412 | 22.37521515 | 30.9810671 | 1.38462 |
| hypothetical protein                                                                                                                                                  | 2795 | 3396446 | 3396595 | 10.06711409 | 0          | 0       |
| hypothetical protein                                                                                                                                                  | 2794 | 3396588 | 3396887 | 31.77257525 | 7.52508361 | 0.23684 |
| hypothetical protein                                                                                                                                                  | 2793 | 3397117 | 3397245 | 31.25       | 0          | 0       |
| Phosphoribosylformylglycinamide synthase, synthetase subunit (EC 6.3.5.3) / Phosphoribosylformylglycinamide synthase, glutamine amidotransferase subunit (EC 6.3.5.3) | 2790 | 3397575 | 3401498 | 97.37445832 | 101.516696 | 1.04254 |
| hypothetical protein                                                                                                                                                  | 2791 | 3401491 | 3402165 | 123.8872404 | 140.207715 | 1.13174 |
| Predicted sucrose permease, MFS family, FucP subfamily                                                                                                                | 2789 | 3402230 | 3403453 | 33.93295176 | 31.2755519 | 0.92169 |
| Hydrolase (HAD superfamily)                                                                                                                                           | 2787 | 3403466 | 3404245 | 67.39409499 | 98.2028241 | 1.45714 |
| hypothetical protein                                                                                                                                                  | 2788 | 3404229 | 3404939 | 346.4788732 | 535.56338  | 1.54573 |
| Translation elongation factor G, mitochondrial                                                                                                                        | 2786 | 3404984 | 3407077 | 1048.768711 | 1535.12796 | 1.46374 |
| hypothetical protein                                                                                                                                                  | 2785 | 3407185 | 3407388 | 14.77832512 | 0          | 0       |
| Sensor protein of zinc sigma-54-dependent two-component system                                                                                                        | 2784 | 3407482 | 3408744 | 57.05229794 | 37.4405705 | 0.65625 |
| Acetoacetate metabolism regulatory protein atoC                                                                                                                       | 2783 | 3408755 | 3410149 | 54.16068867 | 67.7905308 | 1.25166 |
| Leucyl aminopeptidase                                                                                                                                                 | 2782 | 3410202 | 3411350 | 100.6097561 | 101.916376 | 1.01299 |
| UPF0088 protein TP_0032                                                                                                                                               | 2781 | 3411369 | 3412202 | 118.2472989 | 97.2388956 | 0.82234 |
| hypothetical protein                                                                                                                                                  |      | 3412212 | 3413009 | 149.3099122 | 124.215809 | 0.83193 |
| lipoprotein, putative                                                                                                                                                 | 2779 | 3413084 | 3414127 | 109.7794823 | 127.277085 | 1.15939 |
| D-3-phosphoglycerate dehydrogenase (EC 1.1.1.95)                                                                                                                      | 2778 | 3414135 | 3415106 | 140.061792  | 150.61792  | 1.07537 |
| Histone acetyltransferase HPA2 and related acetyltransferases                                                                                                         | 2776 | 3415136 | 3415642 | 52.3715415  | 17.7865613 | 0.33962 |
| polysaccharide deacetylase                                                                                                                                            | 2777 | 3415594 | 3416655 | 44.76908577 | 16.9651272 | 0.37895 |
| Gamma-glutamyl phosphate reductase (EC 1.2.1.41)                                                                                                                      | 2775 | 3416647 | 3417900 | 109.3375898 | 77.2146848 | 0.7062  |
| Glutamate 5-kinase (EC 2.7.2.11)                                                                                                                                      | 2774 | 3417904 | 3418695 | 247.7820025 | 265.209125 | 1.07033 |
| Pyrroline-5-carboxylate reductase (EC 1.5.1.2)                                                                                                                        | 2773 | 3418721 | 3419581 | 154.6511628 | 149.127907 | 0.96429 |
| Phosphate regulon transcriptional regulatory protein phoB                                                                                                             | 2772 | 3419584 | 3420189 | 156.1983471 | 119.008264 | 0.7619  |
| Regulatory protein recX                                                                                                                                               | 2771 | 3420385 | 3421017 | 80.69620253 | 156.64557  | 1.94118 |
| SSU ribosomal protein S9p (S16e)                                                                                                                                      | 2770 | 3421103 | 3421495 | 1091.836735 | 2146.68367 | 1.96612 |
| LSU ribosomal protein L13p (L13Ae)                                                                                                                                    | 2769 | 3421496 | 3422002 | 742.0948617 | 1405.13834 | 1.89348 |
| hypothetical protein                                                                                                                                                  | 2768 | 3422029 | 3422247 | 222.4770642 | 144.495413 | 0.64948 |
| hypothetical protein                                                                                                                                                  | 2767 | 3422262 | 3422564 | 213.5761589 | 335.264901 | 1.56977 |
| Beta-lactamase class C and other penicillin binding proteins                                                                                                          | 2766 | 3422643 | 3423848 | 234.0248963 | 216.59751  | 0.92553 |
| hypothetical protein                                                                                                                                                  | 2765 | 3423841 | 3424866 | 125.3658537 | 133.902439 | 1.06809 |
| Transcriptional repressor of the arabinose operon                                                                                                                     | 2764 | 3425137 | 3426192 | 54.97630332 | 23.4597156 | 0.42672 |
| ABC transporter, permease protein                                                                                                                                     | 2763 | 3426258 | 3427145 | 32.69447576 | 12.6832018 | 0.38793 |
| Multiple sugar ABC transporter, membrane-spanning permease protein MsmG                                                                                               | 2762 | 3427157 | 3428068 | 35.12623491 | 12.349067  | 0.35156 |
| ABC transporter, substrate-binding protein                                                                                                                            | 2761 | 3428150 | 3429628 | 102.165088  | 57.8484438 | 0.56623 |
| hypothetical protein                                                                                                                                                  | 2760 | 3429705 | 3430946 | 43.11039484 | 29.0088638 | 0.6729  |
| hypothetical protein                                                                                                                                                  | 2759 | 3430943 | 3431905 | 40.02079002 | 28.0665281 | 0.7013  |
| Uroporphyrinogen-III decarboxylase                                                                                                                                    | 2757 | 3431968 | 3432987 | 32.87536801 | 11.0402355 | 0.33582 |

|                                                         |      |         |         |             |            |         |
|---------------------------------------------------------|------|---------|---------|-------------|------------|---------|
| hypothetical protein                                    | 2758 | 3432984 | 3433262 | 26.97841727 | 8.09352518 | 0.3     |
| Alpha-mannosidase                                       | 2756 | 3433265 | 3435673 | 98.62956811 | 92.5041528 | 0.93789 |
| Alpha-mannosidase (EC 3.2.1.24)                         | 2755 | 3435698 | 3438841 | 122.9716831 | 136.016545 | 1.10608 |
| Phosphoheptose isomerase 2 (EC 5.3.1.-)                 | 2754 | 3438838 | 3439479 | 124.8049922 | 136.895476 | 1.09688 |
| Glucokinase (EC 2.7.1.2)                                | 2753 | 3439496 | 3440413 | 67.61177754 | 88.3315158 | 1.30645 |
| hypothetical protein                                    | 2752 | 3440406 | 3441542 | 34.77112676 | 63.3802817 | 1.82278 |
| hypothetical protein                                    | 2751 | 3441547 | 3442923 | 112.6453488 | 206.031977 | 1.82903 |
| Mucin 2 precursor                                       | 2750 | 3442932 | 3444383 | 232.2536182 | 431.082012 | 1.85608 |
| gliding motility protein GldF                           | 2749 | 3444393 | 3445256 | 57.93742758 | 96.4658169 | 1.665   |
| ABC-type multidrug transport system, ATPase component   | 2748 | 3445253 | 3446197 | 383.4745763 | 467.161017 | 1.21823 |
| hypothetical protein                                    | 2747 | 3446156 | 3446269 | 221.2389381 | 338.495575 | 1.53    |
| Cell division protein ftsH (EC 3.4.24.-)                | 2746 | 3446313 | 3448274 | 212.9677089 | 221.42491  | 1.03971 |
| hypothetical protein                                    | 2745 | 3448277 | 3448525 | 54.43548387 | 9.07258065 | 0.16667 |
| T. pallidum predicted coding region TP0592              | 2744 | 3448756 | 3449661 | 131.4917127 | 106.906077 | 0.81303 |
| hypothetical protein                                    | 2743 | 3449666 | 3449788 | 639.3442623 | 461.065574 | 0.72115 |
| hypothetical protein                                    | 2742 | 3449860 | 3450861 | 42.95704296 | 51.6983017 | 1.20349 |
| hypothetical protein                                    | 2741 | 3450876 | 3451739 | 93.2792584  | 83.4298957 | 0.89441 |
| hypothetical protein                                    | 2740 | 3451825 | 3452529 | 117.8977273 | 131.036932 | 1.11145 |
| hypothetical protein                                    | 2739 | 3452545 | 3453657 | 138.0395683 | 204.361511 | 1.48046 |
| 2-methylthioadenine synthetase                          | 2738 | 3453683 | 3455026 | 48.39910648 | 36.8577811 | 0.76154 |
| Exoenzymes regulatory protein aepA precursor            | 2737 | 3455105 | 3456751 | 83.23207776 | 72.4483597 | 0.87044 |
| ATP-dependent DNA helicase UvrD/PcrA                    | 2736 | 3456798 | 3459203 | 133.2640333 | 96.3617464 | 0.72309 |
| Uncharacterized protein TP_0678                         | 2735 | 3459204 | 3459968 | 107.3298429 | 64.7905759 | 0.60366 |
| Uncharacterized protein TP_0942                         | 2734 | 3459974 | 3460459 | 206.185567  | 171.649485 | 0.8325  |
| Flagellar biosynthesis protein fliS                     | 2733 | 3460469 | 3460915 | 328.4753363 | 287.556054 | 0.87543 |
| hypothetical protein                                    | 2732 | 3461107 | 3461448 | 491.202346  | 712.609971 | 1.45075 |
| Galactokinase (EC 2.7.1.6)                              | 2731 | 3461478 | 3462836 | 171.2076583 | 202.135493 | 1.18065 |
| ATPase                                                  | 2730 | 3462879 | 3464096 | 40.26294166 | 29.5809367 | 0.73469 |
| GAF domain protein; CDS_ID OB2202                       | 2729 | 3464204 | 3464773 | 58.87521968 | 63.2688928 | 1.07463 |
| hypothetical protein                                    | 2728 | 3464837 | 3465133 | 59.12162162 | 0          | 0       |
| DNA-binding protein                                     | 2727 | 3465138 | 3465434 | 23.64864865 | 0          | 0       |
| DNA polymerase I (EC 2.7.7.7)                           | 2726 | 3465507 | 3468365 | 73.65290413 | 63.7683695 | 0.8658  |
| NADP-dependent malic enzyme (EC 1.1.1.40)               | 2725 | 3468368 | 3469822 | 446.3548831 | 509.112792 | 1.1406  |
| SEC-C motif domain protein                              | 2724 | 3469858 | 3470394 | 142.7238806 | 188.899254 | 1.32353 |
| Threonine synthase (EC 4.2.3.1)                         | 2723 | 3470391 | 3471716 | 227.9245283 | 224.150943 | 0.98344 |
| Prolipoprotein diacylglycerol transferase (EC 2.4.99.-) | 2722 | 3471752 | 3472849 | 102.0966272 | 90.2461258 | 0.88393 |
| hypothetical protein                                    | 2721 | 3472859 | 3475786 | 82.67851042 | 53.040656  | 0.64153 |
| Flagellar synthesis regulator fleN                      | 2720 | 3475796 | 3476941 | 158.9519651 | 141.484716 | 0.89011 |
| hypothetical protein                                    | 2719 | 3476938 | 3477303 | 123.2876712 | 110.958904 | 0.9     |
| Endo-1,4-beta-xylanase A precursor (EC 3.2.1.8)         | 2718 | 3477477 | 3478637 | 85.77586207 | 98.9224138 | 1.15327 |
| Endo-1,4-beta-xylanase A precursor (EC 3.2.1.8)         | 2717 | 3478640 | 3482137 | 418.3585931 | 416.285387 | 0.99504 |
| Glycoprotein gp2                                        | 2716 | 3482356 | 3485325 | 179.0165039 | 264.482991 | 1.47742 |
| Endo-1,4-beta-xylanase A precursor (EC 3.2.1.8)         | 2715 | 3485462 | 3489640 | 314.2651987 | 433.520823 | 1.37947 |
| Ig-like repeat domain protein 1                         | 2714 | 3489657 | 3493229 | 248.4602464 | 388.647816 | 1.56423 |

similar to (EMBL:AL117211) YPMT1.20C,  
 Yersinia pestis CO-92 hypothetical protein from  
 plasmid pMT1; similar to (EMBL:AF074611)  
 Y1035, Yersinia pestis KIM5 hypothetical protein  
 from plasmid pMT1; blastn and dotplot analyses  
 suggest that an insertion event has taken place at  
 this point as compared to Yersinia pestis pMT1

2713 3493248 3495839 217.8695484 343.01428 1.5744

similar to (EMBL:AL117211) YPMT1.20C,  
 Yersinia pestis CO-92 hypothetical protein from  
 plasmid pMT1; similar to (EMBL:AF074611)  
 Y1035, Yersinia pestis KIM5 hypothetical protein  
 from plasmid pMT1; blastn and dotplot analyses  
 suggest that an insertion event has taken place at  
 this point as compared to Yersinia pestis pMT1

2712 3496004 3498055 261.8235007 354.339347 1.35335

RTX toxin, putative  
 Carboxyl-terminal protease (EC 3.4.21.102)  
 Small ribosomal subunit 16S rRNA  
 methyltransferase ## U1498-specific in E.coli  
 hypothetical protein  
 tRNA:Cm32/Um32 methyltransferase  
 D-beta-hydroxybutyrate dehydrogenase (EC  
 1.1.1.30)  
 anti-sigma F factor antagonist (spolIIA-2); anti  
 sigma b factor antagonist RsbV  
 hypothetical protein  
 Phage shock protein A

2711 3498123 3499970 329.9945858 495.804006 1.50246

2710 3500455 3501951 421.4572193 407.586898 0.96709

2709 3501984 3502790 100.4962779 100.496278 1

3503057 3503263 97.08737864 262.135922 2.7

2707 3503657 3504457 150 67.5 0.45

2706 3504495 3505232 258.4803256 235.074627 0.90945

2705 3505382 3505933 357.5317604 530.852995 1.48477

2704 3505990 3506334 792.1511628 1059.59302 1.33761

2703 3506347 3507039 651.0115607 1024.2052 1.57325

2-dehydro-3-deoxygluconate kinase (EC 2.7.1.45)  
 hypothetical protein

2702 3507049 3508071 295.9882583 402.886497 1.36116

2701 3508369 3509283 103.3916849 39.3873085 0.38095

2700 3509276 3511075 105.0583658 81.295164 0.77381

DnaJ-like protein DjIA

2699 3511167 3511862 64.02877698 45.323741 0.70787

hypothetical protein

2698 3512126 3512320 23.19587629 11.5979381 0.5

hypothetical protein

2697 3512886 3513254 76.08695652 61.1413043 0.80357

hypothetical protein

2696 3513261 3513635 306.1497326 288.770053 0.94323

hypothetical protein

2695 3513651 3514670 269.3817468 260.549558 0.96721

unknown

2694 3514691 3516133 147.3647712 123.266297 0.83647

ATP-dependent RNA helicase RhlB

2693 3516273 3518060 428.7317621 506.313131 1.18096

ABC transporter, ATP-binding protein

2692 3518089 3519723 149.1712707 225.138122 1.50926

Uncharacterized protein TP\_0369 precursor

2691 3519730 3521202 184.1032609 134.51087 0.73063

hypothetical protein

2690 3521226 3521702 135.5042017 80.3571429 0.59302

hypothetical protein

2689 3521824 3521970 6.849315068 0 0

Flavodoxin

2688 3521925 3522392 2.141327623 0 0

transposase, mutator family

2687 3522440 3523681 87.42949234 19.9435939 0.22811

hypothetical protein

2686 3523746 3524024 424.4604317 671.76259 1.58263

hypothetical protein

2685 3524255 3524380 0 0 #DIV/0!

hypothetical protein

2684 3524386 3524574 23.93617021 0 0

hypothetical protein

2683 3524546 3524725 273.7430168 452.513966 1.65306

Peptide chain release factor 1

2682 3524718 3525788 525.9433962 560.377358 1.06547

Methylase of polypeptide chain release factors

2681 3525813 3526727 328.7746171 273.249453 0.83111

|                                                                  |      |         |         |             |            |         |
|------------------------------------------------------------------|------|---------|---------|-------------|------------|---------|
| GTP pyrophosphokinase (EC 2.7.6.5), (p)ppGpp synthetase I        |      | 3526714 | 3528747 | 155.4353173 | 112.887359 | 0.72627 |
| Capsule biosynthesis protein capA                                | 2679 | 3528751 | 3529920 | 62.8742515  | 40.4191617 | 0.64286 |
| Major facilitator (MFS) superfamily multidrug resistance protein | 2677 | 3529968 | 3531185 | 43.96055875 | 57.3130649 | 1.30374 |
| Uncharacterized protein TP_0214                                  | 2678 | 3531176 | 3531397 | 622.1719457 | 1802.0362  | 2.89636 |
| LSU ribosomal protein L17p                                       | 2676 | 3531398 | 3531856 | 1042.576419 | 2775.65502 | 2.6623  |
| DNA-directed RNA polymerase alpha subunit (EC 2.7.7.6)           | 2675 | 3531846 | 3532901 | 849.1295938 | 2073.74275 | 2.4422  |
| SSU ribosomal protein S4p (S9e)                                  | 2674 | 3532911 | 3533546 | 829.6178344 | 1748.40764 | 2.10749 |
| SSU ribosomal protein S11p (S14e)                                | 2673 | 3533563 | 3533946 | 1214.099217 | 2743.47258 | 2.25968 |
| SSU ribosomal protein S13p (S18e)                                | 2672 | 3533959 | 3534324 | 864.3835616 | 1707.53425 | 1.97544 |
| Preprotein translocase secY subunit (TC 3.A.5.1.1)               | 2671 | 3534522 | 3535850 | 335.3566009 | 839.908953 | 2.50452 |
| LSU ribosomal protein L15p (L27Ae)                               | 2670 | 3535843 | 3536283 | 352.2727273 | 680.113636 | 1.93065 |
| LSU ribosomal protein L30p (L7e)                                 | 2669 | 3536283 | 3536465 | 211.5384615 | 333.791209 | 1.57792 |
| SSU ribosomal protein S5p (S2e)                                  | 2668 | 3536467 | 3537048 | 1213.425129 | 2823.14974 | 2.3266  |
| LSU ribosomal protein L18p (L5e)                                 | 2667 | 3537057 | 3537419 | 864.640884  | 1995.16575 | 2.30751 |
| LSU ribosomal protein L6p (L9e)                                  | 2666 | 3537428 | 3537967 | 709.6474954 | 2149.81447 | 3.02941 |
| SSU ribosomal protein S8p (S15Ae)                                | 2665 | 3537980 | 3538378 | 468.1933842 | 1190.83969 | 2.54348 |
| SSU ribosomal protein S14p (S29e)                                | 2664 | 3538388 | 3538573 | 505.4644809 | 1241.80328 | 2.45676 |
| LSU ribosomal protein L5p (L11e)                                 | 2663 | 3538584 | 3539135 | 954.6279492 | 2294.91833 | 2.40399 |
| LSU ribosomal protein L24p (L26e)                                | 2662 | 3539135 | 3539461 | 960.1226994 | 2622.69939 | 2.73163 |
| LSU ribosomal protein L14p (L23e)                                | 2661 | 3539471 | 3539842 | 394.8787062 | 1024.93261 | 2.59556 |
| SSU ribosomal protein S17p (S11e)                                | 2660 | 3539858 | 3540130 | 900.7352941 | 2332.72059 | 2.5898  |
| LSU ribosomal protein L29p (L35e)                                | 2659 | 3540134 | 3540361 | 1171.806167 | 2735.68282 | 2.33459 |
| LSU ribosomal protein L16p (L10e)                                | 2658 | 3540371 | 3540796 | 862.3529412 | 1990.58824 | 2.30832 |
| SSU ribosomal protein S3p (S3e)                                  | 2657 | 3540799 | 3541506 | 1106.534091 | 2358.66477 | 2.13158 |
| LSU ribosomal protein L22p (L17e)                                | 2656 | 3541507 | 3541875 | 720.1086957 | 1754.75543 | 2.43679 |
| SSU ribosomal protein S19p (S15e)                                | 2655 | 3541887 | 3542168 | 485.7651246 | 1249.11032 | 2.57143 |
| LSU ribosomal protein L2p (L8e)                                  | 2654 | 3542180 | 3543007 | 1026.602177 | 2415.96131 | 2.35336 |
| LSU ribosomal protein L23p (L23Ae)                               | 2653 | 3543014 | 3543301 | 611.4982578 | 1348.43206 | 2.20513 |
| LSU ribosomal protein L4p (L1e)                                  | 2652 | 3543298 | 3543996 | 1344.555874 | 2962.39255 | 2.20325 |
| LSU ribosomal protein L3p (L3e)                                  | 2651 | 3544001 | 3544636 | 788.1889764 | 1782.28346 | 2.26124 |
| SSU ribosomal protein S10p (S20e)                                | 2650 | 3544761 | 3545165 | 2334.586466 | 4719.92481 | 2.02174 |
| Translation elongation factor Tu                                 | 2649 | 3545189 | 3546388 | 4977.898249 | 8825.47957 | 1.77293 |
| hypothetical protein                                             | 2648 | 3546514 | 3546714 | 110         | 157.5      | 1.43182 |
| SSU ribosomal protein S7p (S5e)                                  | 2647 | 3546788 | 3547258 | 975.5319149 | 2163.82979 | 2.2181  |
| SSU ribosomal protein S12p (S23e)                                | 2646 | 3547271 | 3547684 | 3070.217918 | 5180.99274 | 1.6875  |
| Maltose/maltodextrin ABC transporter, permease protein MalG      | 2645 | 3547758 | 3548606 | 94.92924528 | 92.865566  | 0.97826 |
| ABC-type sugar transport systems, permease components            | 2644 | 3548603 | 3549499 | 102.6785714 | 72.8236607 | 0.70924 |
| Sugar ABC transporter, periplasmic sugar-binding protein         | 2643 | 3549523 | 3550794 | 792.6829268 | 787.765539 | 0.9938  |
| hypothetical protein                                             | 2642 | 3550870 | 3552780 | 98.42931937 | 53.0104712 | 0.53856 |
| diguanylate cyclase (GGDEF domain) with PAS/PAC sensor           | 2641 | 3552784 | 3553791 | 237.8351539 | 254.716981 | 1.07098 |
| Putative Heme-regulated two-component response regulator         | 2640 | 3553788 | 3554828 | 156.7307692 | 229.326923 | 1.46319 |
| hypothetical protein-signal peptide and transmembrane prediction | 2639 | 3554957 | 3555694 | 160.7869742 | 131.275441 | 0.81646 |



|                                                                                                         |      |         |         |             |            |         |
|---------------------------------------------------------------------------------------------------------|------|---------|---------|-------------|------------|---------|
| Sorbitol dehydrogenase (EC 1.1.1.14)                                                                    | 2638 | 3555705 | 3556739 | 149.9032882 | 110.976789 | 0.74032 |
| Gluconokinase (EC 2.7.1.12) / oxidoreductase domain                                                     | 2637 | 3556747 | 3557814 | 106.841612  | 99.1096532 | 0.92763 |
| hypothetical protein                                                                                    | 2636 | 3557798 | 3557953 | 51.61290323 | 43.5483871 | 0.84375 |
| possible Bacterial Ig-like domain (group 1)                                                             | 2635 | 3558194 | 3559915 | 138.5822196 | 61.4468332 | 0.4434  |
| Outer membrane autotransporter barrel                                                                   | 2634 | 3559928 | 3564631 | 248.671061  | 125.823942 | 0.50599 |
| Oxidoreductase domain protein                                                                           | 2633 | 3564640 | 3565782 | 124.3432574 | 100.481611 | 0.8081  |
| Short-chain dehydrogenase/reductase SDR                                                                 | 2632 | 3565818 | 3566570 | 117.6861702 | 59.8404255 | 0.50847 |
| 2-hydroxy-3-oxopropionate reductase (EC 1.1.1.60)                                                       | 2631 | 3566571 | 3567452 | 120.8853575 | 104.710556 | 0.8662  |
| Transketolase, C-terminal section (EC 2.2.1.1)                                                          | 2630 | 3567469 | 3568419 | 93.15789474 | 54.4736842 | 0.58475 |
| Transketolase, N-terminal section (EC 2.2.1.1)                                                          | 2629 | 3568419 | 3569255 | 77.15311005 | 43.062201  | 0.55814 |
| Aldehyde dehydrogenase (EC 1.2.1.3)                                                                     | 2628 | 3569273 | 3570826 | 60.8499678  | 44.9130715 | 0.7381  |
| Putative sugar ABC transporter                                                                          | 2627 | 3570843 | 3571691 | 36.55660377 | 10.6132075 | 0.29032 |
| Multiple sugar ABC transporter, membrane-spanning permease protein MsmF                                 | 2626 | 3571714 | 3572604 | 38.20224719 | 7.58426966 | 0.19853 |
| Putative sugar-binding protein                                                                          | 2625 | 3572679 | 3573962 | 198.3632112 | 236.749805 | 1.19352 |
| hypothetical protein                                                                                    | 2624 | 3574093 | 3575514 | 110.8374384 | 128.25475  | 1.15714 |
| Electron transport complex protein rnfB                                                                 | 2623 | 3575514 | 3576332 | 217.603912  | 302.567237 | 1.39045 |
| Electron transport complex protein rnfA                                                                 | 2622 | 3576343 | 3576918 | 204.3478261 | 289.565217 | 1.41702 |
| Electron transport complex protein rnfE                                                                 | 2621 | 3576918 | 3577547 | 162.1621622 | 186.009539 | 1.14706 |
| Electron transport complex protein rnfG                                                                 | 2620 | 3577544 | 3578152 | 435.8552632 | 395.970395 | 0.90849 |
| Electron transport complex protein rnfD                                                                 | 2619 | 3578149 | 3579162 | 461.994077  | 330.94768  | 0.71635 |
| Electron transport complex protein rnfC                                                                 | 2618 | 3579175 | 3580581 | 548.3641536 | 636.913229 | 1.16148 |
| Uncharacterized protein TP_0900                                                                         | 2617 | 3580702 | 3583560 | 37.61371589 | 25.9797061 | 0.6907  |
| ATP-dependent nuclease, subunit A                                                                       | 2615 | 3583557 | 3587177 | 53.59116022 | 39.7790055 | 0.74227 |
| Na <sup>+</sup> driven multidrug efflux pump                                                            | 2616 | 3587174 | 3588553 | 43.14720812 | 22.8426396 | 0.52941 |
| Ornithine decarboxylase (EC 4.1.1.17) / Arginine decarboxylase (EC 4.1.1.19)                            | 2613 | 3588722 | 3589894 | 341.4422242 | 383.145091 | 1.12214 |
| Phenylalanyl-tRNA synthetase beta chain (EC 6.1.1.20)                                                   | 2614 | 3589884 | 3591626 | 328.358209  | 384.902411 | 1.1722  |
| hypothetical protein                                                                                    | 2612 | 3591725 | 3592723 | 87.6753507  | 63.1262525 | 0.72    |
| Methyl-accepting chemotaxis protein                                                                     | 2611 | 3592789 | 3593223 | 18.43317972 | 5.1843318  | 0.28125 |
| hypothetical protein                                                                                    | 2610 | 3593260 | 3593469 | 76.55502392 | 10.7655502 | 0.14063 |
| hypothetical protein                                                                                    | 2609 | 3593558 | 3593776 | 68.07511737 | 126.760563 | 1.86207 |
| Chain A, Crystal Structure Of Yfir, A Putative Transcriptional Regulator From Bacillus Subtilis unknown | 2608 | 3593961 | 3594593 | 30.85443038 | 0          | 0       |
| hypothetical protein                                                                                    | 2606 | 3594597 | 3594965 | 33.9673913  | 0          | 0       |
| hypothetical protein                                                                                    | 2606 | 3595069 | 3595188 | 8.403361345 | 0          | 0       |
| Alpha-mannosidase (EC 3.2.1.24)                                                                         | 2605 | 3595632 | 3598334 | 70.13323464 | 50.7957069 | 0.72427 |
| 2-deoxy-D-gluconate 3-dehydrogenase (EC 1.1.1.125)                                                      | 2604 | 3598370 | 3598609 | 41.84100418 | 0          | 0       |
| hypothetical protein                                                                                    | 2603 | 3598829 | 3599023 | 5.154639175 | 11.5979381 | 2.25    |
| hypothetical protein                                                                                    | 2602 | 3599023 | 3599754 | 1.367989056 | 0          | 0       |
| hypothetical protein                                                                                    | 2601 | 3599763 | 3600941 | 7.215619694 | 1.91001698 | 0.26471 |
| Plectin 8                                                                                               | 2600 | 3601087 | 3602409 | 23.82753404 | 6.80786687 | 0.28571 |
| Metal-dependent hydrolases of the beta-lactamase superfamily III                                        | 2599 | 3602623 | 3603549 | 18.89848812 | 7.28941685 | 0.38571 |
| DnaJ-class molecular chaperone CbpA                                                                     | 2598 | 3603616 | 3604293 | 5.908419498 | 0          | 0       |
| transposase, mutator family                                                                             | 2597 | 3604712 | 3605953 | 86.62369057 | 45.3263497 | 0.52326 |
| hypothetical protein                                                                                    | 2596 | 3606028 | 3607245 | 12.3253903  | 11.0928513 | 0.9     |

|                                                                                                            |      |         |         |             |            |         |
|------------------------------------------------------------------------------------------------------------|------|---------|---------|-------------|------------|---------|
| Transcriptional regulator, DeoR family                                                                     | 2595 | 3607309 | 3608295 | 17.24137931 | 13.6916836 | 0.79412 |
| hypothetical protein                                                                                       | 2594 | 3608302 | 3608445 | 55.94405594 | 62.9370629 | 1.125   |
| Protein of unknown function DUF262 family                                                                  | 2593 | 3608522 | 3610228 | 19.92966002 | 32.971864  | 1.65441 |
| Transcription accessory protein (S1 RNA-binding domain)                                                    | 2592 | 3610418 | 3612850 | 132.4013158 | 160.053454 | 1.20885 |
| MloA protein, putative                                                                                     | 2591 | 3612966 | 3614054 | 26.65441176 | 20.6801471 | 0.77586 |
| Mutator mutT protein (7,8-dihydro-8-oxoguanine-triphosphatase) (EC 3.6.1.-)                                | 2590 | 3614121 | 3614525 | 42.07920792 | 0          | 0       |
| hypothetical protein                                                                                       | 2589 | 3614575 | 3614967 | 117.3469388 | 149.234694 | 1.27174 |
| HEN1 C-terminal domain; double-stranded RNA 3'-methylase                                                   | 2588 | 3615023 | 3616486 | 117.2248804 | 70.7450444 | 0.6035  |
| protein serine-threonine phosphatase                                                                       | 2587 | 3616483 | 3619167 | 124.8137109 | 109.817437 | 0.87985 |
| Appr-1-p processing                                                                                        | 2586 | 3619204 | 3619743 | 36.17810761 | 12.5231911 | 0.34615 |
| transcriptional regulator, MarR family                                                                     | 2585 | 3619749 | 3620186 | 38.00475059 | 21.3776722 | 0.5625  |
| Multi antimicrobial extrusion protein (Na <sup>+</sup> )/drug antiporter), MATE family of MDR efflux pumps | 2584 | 3620176 | 3621498 | 39.15171289 | 11.0114192 | 0.28125 |
| hypothetical protein                                                                                       | 2583 | 3621616 | 3621786 | 17.64705882 | 0          | 0       |
| Methyl-accepting chemotaxis protein                                                                        | 2582 | 3621777 | 3623627 | 62.7027027  | 24.3243243 | 0.38793 |
| Multidrug resistance ABC transporter ATP-binding and permease protein                                      | 2581 | 3623664 | 3625439 | 119.4366197 | 103.943662 | 0.87028 |
| Multidrug resistance ABC transporter ATP-binding and permease protein                                      | 2580 | 3625429 | 3627234 | 86.70360111 | 64.8199446 | 0.7476  |
| Methyltransferase gidB (EC 2.1.-.-)                                                                        | 2579 | 3627203 | 3627901 | 55.8739255  | 35.4584527 | 0.63462 |
| Two-component sensor kinase yesM (EC 2.7.3.-)                                                              | 2578 | 3627904 | 3629460 | 16.38817481 | 4.33804627 | 0.26471 |
| Alpha-galactosidase (EC 3.2.1.22)                                                                          | 2577 | 3629551 | 3631560 | 29.11896466 | 4.47984072 | 0.15385 |
| ABC transporter, substrate-binding protein                                                                 | 2576 | 3631631 | 3633193 | 29.76952625 | 10.0832266 | 0.33871 |
| ABC-type polysaccharide transport system, permease component                                               | 2575 | 3633208 | 3634152 | 32.83898305 | 2.38347458 | 0.07258 |
| maltose/maltodextrin transport permease                                                                    | 2574 | 3634166 | 3635062 | 18.97321429 | 0          | 0       |
| Two-component response regulator yesN                                                                      | 2573 | 3635073 | 3635843 | 21.42857143 | 0          | 0       |
| hypothetical protein                                                                                       |      | 3635876 | 3636001 | 32          | 0          | 0       |
| PilT protein, N-terminal                                                                                   | 2571 | 3636138 | 3636524 | 37.97468354 | 0          | 0       |
| hypothetical protein                                                                                       | 2570 | 3636503 | 3636796 | 29.41176471 | 11.0294118 | 0.375   |
| hypothetical protein                                                                                       | 2569 | 3636939 | 3638072 | 56.04589585 | 23.8305384 | 0.4252  |
| hypothetical protein                                                                                       | 2568 | 3638148 | 3638366 | 231.6513761 | 340.59633  | 1.4703  |
| Uroporphyrinogen-III decarboxylase                                                                         | 2567 | 3638363 | 3638608 | 155.1020408 | 165.306122 | 1.06579 |
| loll protein                                                                                               | 2566 | 3638652 | 3639497 | 171.0059172 | 183.727811 | 1.07439 |
| Two-component response regulator yesN                                                                      | 2565 | 3639614 | 3639997 | 15.66579634 | 5.87467363 | 0.375   |
| Multiple sugar ABC transporter, membrane-spanning permease protein MsmG                                    |      | 3640196 | 3640684 | 25.6147541  | 0          | 0       |
| hypothetical protein                                                                                       | 2564 | 3640681 | 3640803 | 0           | 0          | #DIV/0! |
| Beta-mannosidase (EC 3.2.1.25)                                                                             | 2562 | 3640903 | 3643419 | 83.26709062 | 83.1677266 | 0.99881 |
| Pyruvate formate-lyase activating enzyme (EC 1.97.1.4)                                                     | 2561 | 3643442 | 3644344 | 79.26829268 | 82.3170732 | 1.03846 |
| Pyruvate formate-lyase (EC 2.3.1.54)                                                                       | 2560 | 3644332 | 3646536 | 102.9945554 | 96.9827586 | 0.94163 |
| hypothetical protein                                                                                       | 2559 | 3646546 | 3647970 | 117.2752809 | 126.404494 | 1.07784 |
| Iron-sulfur cluster-binding protein                                                                        | 2558 | 3647988 | 3648824 | 80.74162679 | 56.5191388 | 0.7     |
| Phosphoribosylaminoimidazole carboxylase catalytic subunit (EC 4.1.1.21)                                   | 2557 | 3648848 | 3649327 | 289.1440501 | 366.388309 | 1.26715 |

|                                                                                                                 |      |         |         |             |            |         |
|-----------------------------------------------------------------------------------------------------------------|------|---------|---------|-------------|------------|---------|
| Phosphoribosylaminoimidazole-<br>succinocarboxamide synthase (EC 6.3.2.6)                                       | 2556 | 3649324 | 3650043 | 86.23087622 | 125.173853 | 1.45161 |
| Amidophosphoribosyltransferase (EC 2.4.2.14)                                                                    | 2555 | 3650018 | 3651439 | 202.3223082 | 201.090781 | 0.99391 |
| Sensory box histidine kinase/response regulator                                                                 | 2554 | 3651445 | 3653607 | 97.36355227 | 100.948196 | 1.03682 |
| Transposase subunit                                                                                             | 2553 | 3654227 | 3654577 | 15.71428571 | 6.42857143 | 0.40909 |
| hypothetical protein                                                                                            | 2552 | 3654851 | 3655045 | 48.96907216 | 0          | 0       |
| Ribose operon repressor                                                                                         | 2551 | 3655067 | 3656089 | 27.88649706 | 6.60469667 | 0.23684 |
| N-acylglucosamine 2-epimerase (EC 5.1.3.8)                                                                      | 2550 | 3656377 | 3657669 | 28.25077399 | 3.48297214 | 0.12329 |
| hypothetical protein                                                                                            | 2549 | 3657723 | 3659693 | 13.70558376 | 7.99492386 | 0.58333 |
| N-Acetyl-D-glucosamine ABC transport system,<br>sugar-binding protein                                           | 2548 | 3659739 | 3661085 | 34.54680535 | 8.35809807 | 0.24194 |
| N-Acetyl-D-glucosamine ABC transport system,<br>permease protein 1                                              | 2547 | 3661166 | 3662056 | 16.29213483 | 5.05617978 | 0.31034 |
| N-Acetyl-D-glucosamine ABC transport system,<br>permease protein 2                                              | 2545 | 3662068 | 3662913 | 26.62721893 | 0          | 0       |
| hydrolase, haloacid dehalogenase-like family                                                                    | 2546 | 3662910 | 3663758 | 34.19811321 | 7.95990566 | 0.23276 |
| Phosphoribosylformylglycinamide cyclo-ligase<br>(EC 6.3.3.1)                                                    | 2544 | 3663805 | 3664923 | 175.0448833 | 135.32316  | 0.77308 |
| Phosphoribosylglycinamide formyltransferase (EC<br>2.1.2.2)                                                     | 2543 | 3664966 | 3665586 | 105.6451613 | 101.612903 | 0.96183 |
| IMP cyclohydrolase (EC 3.5.4.10) /<br>Phosphoribosylaminoimidazolecarboxamide<br>formyltransferase (EC 2.1.2.3) | 2542 | 3665583 | 3667229 | 84.14337789 | 61.5127582 | 0.73105 |
| Phosphoribosylamine--glycine ligase (EC<br>6.3.4.13)                                                            | 2541 | 3667272 | 3668597 | 81.50943396 | 67.9245283 | 0.83333 |
| Hemolysins and related proteins containing CBS<br>domains                                                       | 2540 | 3668590 | 3669915 | 55.47169811 | 35.6603774 | 0.64286 |
| Radical SAM domain protein                                                                                      | 2539 | 3669908 | 3670894 | 62.37322515 | 27.3833671 | 0.43902 |
| membrane protein, putative                                                                                      | 2538 | 3671009 | 3672379 | 111.3138686 | 119.890511 | 1.07705 |
| Fragment flavodoxin oxidoreductase                                                                              | 2537 | 3672383 | 3673660 | 165.6225529 | 204.385278 | 1.23404 |
| D-galactose 1-dehydrogenase (EC 1.1.1.48)                                                                       | 2536 | 3673690 | 3674724 | 153.2882012 | 187.137331 | 1.22082 |
| Iron-sulfur cluster-binding protein                                                                             | 2535 | 3674726 | 3675877 | 117.7237185 | 119.244136 | 1.01292 |
| Threonine synthase (EC 4.2.3.1)                                                                                 | 2534 | 3675915 | 3677219 | 128.4509202 | 115.605828 | 0.9     |
| Mechanosensitive ion channel family protein                                                                     | 2532 | 3677261 | 3678442 | 80.86367485 | 87.6375953 | 1.08377 |
| Multiple sugar ABC transporter, membrane-<br>spanning permease protein MsmG                                     | 2533 | 3678439 | 3679266 | 55.01813785 | 46.2515115 | 0.84066 |
| N-Acetyl-D-glucosamine ABC transport system,<br>permease protein 1                                              |      | 3679266 | 3680150 | 31.10859729 | 20.361991  | 0.65455 |
| Multiple sugar ABC transporter, substrate-binding<br>protein                                                    | 2530 | 3680216 | 3681514 | 73.18952234 | 39.8690293 | 0.54474 |
| Two-component sensor histidine kinase                                                                           | 2529 | 3681532 | 3683424 | 103.3298097 | 77.2991543 | 0.74808 |
| DNA-binding response regulator                                                                                  | 2527 | 3683412 | 3684929 | 96.57218194 | 63.7771918 | 0.66041 |
| Prokaryotic ATPase                                                                                              | 2528 | 3684880 | 3686019 | 43.02019315 | 21.7295874 | 0.5051  |
| tRNA nucleotidyltransferase (EC 2.7.7.25)                                                                       | 2526 | 3686114 | 3687271 | 87.29472774 | 66.119274  | 0.75743 |
| hypothetical protein                                                                                            | 2525 | 3687373 | 3688074 | 9.985734665 | 3.20970043 | 0.32143 |
| Acetyltransferase, GNAT family protein                                                                          | 2524 | 3688071 | 3688586 | 19.41747573 | 17.4757282 | 0.9     |
| Protease IV                                                                                                     | 2523 | 3688680 | 3690314 | 67.31946144 | 31.6707466 | 0.47045 |
| Alpha amylase                                                                                                   | 2522 | 3690359 | 3693979 | 162.0165746 | 126.174033 | 0.77877 |
| hypothetical protein                                                                                            | 2521 | 3693966 | 3694121 | 112.9032258 | 58.0645161 | 0.51429 |
| hypothetical protein                                                                                            | 2520 | 3694149 | 3696575 | 25.35037098 | 12.9843364 | 0.5122  |
| Protein of unknown function DUF262 family                                                                       |      | 3696575 | 3697426 | 6.462984724 | 0          | 0       |

|                                                                                                      |      |         |         |             |            |         |
|------------------------------------------------------------------------------------------------------|------|---------|---------|-------------|------------|---------|
| hypothetical protein                                                                                 |      | 3697515 | 3698306 | 29.70922882 | 8.5335019  | 0.28723 |
| 5-methyltetrahydrofolate--homocysteine methyltransferase (EC 2.1.1.13)                               | 2517 | 3698576 | 3699868 | 111.4551084 | 55.7275542 | 0.5     |
| Cystine-binding periplasmic protein precursor                                                        | 2516 | 3699891 | 3700640 | 58.07743658 | 48.0640854 | 0.82759 |
| hypothetical protein                                                                                 | 2515 | 3700597 | 3700710 | 66.37168142 | 99.5575221 | 1.5     |
| Endoglucanase D precursor (EC 3.2.1.4)                                                               | 2513 | 3700763 | 3702451 | 93.60189573 | 89.306872  | 0.95411 |
| Very-short-patch mismatch repair endonuclease (G-T specific)                                         | 2514 | 3702429 | 3702932 | 43.73757455 | 8.94632207 | 0.20455 |
| Ribonuclease D (EC 3.1.26.3)                                                                         | 2512 | 3702960 | 3703808 | 30.07075472 | 53.0660377 | 1.76471 |
| Arsenate reductase (EC 1.20.4.1)                                                                     | 2511 | 3703814 | 3704149 | 110.4477612 | 73.880597  | 0.66892 |
| hypothetical protein                                                                                 | 2510 | 3704272 | 3705147 | 144         | 136.285714 | 0.94643 |
| hypothetical protein                                                                                 | 2509 | 3705151 | 3705945 | 156.8010076 | 127.518892 | 0.81325 |
| Transcriptional regulator, Hth-3 family                                                              | 2508 | 3705979 | 3706536 | 110.4129264 | 92.9084381 | 0.84146 |
| Acetyl-coenzyme A synthetase (EC 6.2.1.1)                                                            | 2507 | 3706536 | 3708230 | 204.8406139 | 217.827627 | 1.0634  |
| Site-specific tyrosine recombinase                                                                   | 2505 | 3708494 | 3709720 | 74.22512235 | 25.6933116 | 0.34615 |
| hypothetical protein                                                                                 | 2504 | 3709957 | 3710142 | 35.13513514 | 12.1621622 | 0.34615 |
| hypothetical protein                                                                                 | 2503 | 3710779 | 3710895 | 43.10344828 | 0          | 0       |
| hypothetical protein                                                                                 |      | 3711218 | 3711727 | 61.88605108 | 30.9430255 | 0.5     |
| hypothetical protein                                                                                 | 2501 | 3711738 | 3712019 | 49.82206406 | 16.0142349 | 0.32143 |
| putative structure; Structural component (Phage or Prophage Related)                                 | 2500 | 3712021 | 3714291 | 48.6784141  | 13.876652  | 0.28507 |
| hypothetical protein                                                                                 | 2499 | 3714516 | 3714764 | 20.16129032 | 27.2177419 | 1.35    |
| hypothetical protein                                                                                 | 2498 | 3714761 | 3715921 | 63.79310345 | 11.637931  | 0.18243 |
| hypothetical protein                                                                                 | 2497 | 3715942 | 3716319 | 22.5464191  | 5.96816976 | 0.26471 |
| phage terminase, small subunit, putative                                                             | 2496 | 3716391 | 3716900 | 30.4518664  | 8.84086444 | 0.29032 |
| hypothetical protein                                                                                 | 2495 | 3717043 | 3717477 | 51.84331797 | 10.3686636 | 0.2     |
| hypothetical protein                                                                                 | 2494 | 3717564 | 3717743 | 83.79888268 | 87.9888268 | 1.05    |
| hypothetical protein                                                                                 | 2493 | 3717718 | 3717900 | 134.6153846 | 74.1758242 | 0.55102 |
| Integration host factor beta subunit                                                                 | 2492 | 3717890 | 3718210 | 129.6875    | 42.1875    | 0.3253  |
| hypothetical protein                                                                                 | 2491 | 3718203 | 3718385 | 96.15384615 | 74.1758242 | 0.77143 |
| hypothetical protein                                                                                 | 2490 | 3718378 | 3718608 | 23.91304348 | 29.3478261 | 1.22727 |
| hypothetical protein                                                                                 | 2489 | 3718605 | 3718880 | 74.54545455 | 16.3636364 | 0.21951 |
| hypothetical protein                                                                                 | 2488 | 3718877 | 3719167 | 41.37931034 | 0          | 0       |
| hypothetical protein                                                                                 | 2487 | 3719164 | 3719460 | 42.22972973 | 15.2027027 | 0.36    |
| hypothetical protein                                                                                 | 2486 | 3719618 | 3719908 | 37.93103448 | 23.2758621 | 0.61364 |
| hypothetical protein                                                                                 | 2485 | 3720038 | 3720241 | 54.18719212 | 22.1674877 | 0.40909 |
| hypothetical protein                                                                                 | 2484 | 3720238 | 3720450 | 30.66037736 | 31.8396226 | 1.03846 |
| hypothetical protein                                                                                 | 2483 | 3720529 | 3720648 | 63.02521008 | 0          | 0       |
| hypothetical protein                                                                                 | 2482 | 3720742 | 3720963 | 74.66063348 | 61.0859729 | 0.81818 |
| Putative cytoplasmic protein                                                                         | 2481 | 3721020 | 3721388 | 294.7658402 | 260.330579 | 0.88318 |
| hypothetical protein                                                                                 | 2480 | 3721385 | 3721591 | 587.3786408 | 567.961165 | 0.96694 |
| hypothetical protein                                                                                 | 2479 | 3721887 | 3722090 | 174.8768473 | 166.256158 | 0.9507  |
| hypothetical protein                                                                                 | 2478 | 3722237 | 3722959 | 61.63434903 | 43.6288089 | 0.70787 |
| S-ribosylhomocysteine lyase (EC 4.4.1.21) / Autoinducer-2 production protein LuxS                    | 2477 | 3722963 | 3723439 | 153.3613445 | 127.62605  | 0.83219 |
| 5'-methylthioadenosine nucleosidase (EC 3.2.2.16) / S-adenosylhomocysteine nucleosidase (EC 3.2.2.9) | 2476 | 3723441 | 3724151 | 259.1549296 | 212.323944 | 0.81929 |
| GGDEF domain protein                                                                                 | 2475 | 3724161 | 3725321 | 186.637931  | 122.198276 | 0.65473 |
| hypothetical protein                                                                                 | 2474 | 3725321 | 3725881 | 527.6785714 | 393.75     | 0.74619 |
| Predicted endonuclease distantly related to archaeal Holliday junction resolvase                     | 2473 | 3726032 | 3726379 | 76.36887608 | 77.8097983 | 1.01887 |

|                                                                                           |      |         |         |             |            |         |
|-------------------------------------------------------------------------------------------|------|---------|---------|-------------|------------|---------|
| HD domain protein                                                                         | 2472 | 3726372 | 3727550 | 310.2564103 | 236.538462 | 0.7624  |
| Uncharacterized homolog of the cytoplasmic domain of flagellar protein FhIB               | 2471 | 3727547 | 3727822 | 214.5454545 | 106.363636 | 0.49576 |
| hypothetical protein                                                                      | 2470 | 3727824 | 3728780 | 99.37238494 | 98.8493724 | 0.99474 |
| LSU ribosomal protein L19p                                                                | 2469 | 3728792 | 3729205 | 869.2493947 | 1280.26634 | 1.47284 |
| tRNA (Guanine37-N1) -methyltransferase (EC 2.1.1.31)                                      | 2468 | 3729183 | 3729983 | 171.25      | 362.8125   | 2.11861 |
| 16S rRNA processing protein RimM                                                          | 2467 | 3730018 | 3730524 | 103.7549407 | 137.84585  | 1.32857 |
| UPF0109 protein CPE1711                                                                   | 2466 | 3730541 | 3730774 | 482.832618  | 878.755365 | 1.82    |
| SSU ribosomal protein S16p                                                                | 2465 | 3730842 | 3731093 | 402.3904382 | 770.916335 | 1.91584 |
| hypothetical protein                                                                      | 2464 | 3731261 | 3731536 | 132.7272727 | 130.909091 | 0.9863  |
| Serine protease (EC 3.4.21.-)                                                             | 2463 | 3731523 | 3732347 | 216.0194175 | 152.912621 | 0.70787 |
| hypothetical protein                                                                      | 2462 | 3732347 | 3732949 | 157.807309  | 153.239203 | 0.97105 |
| hypothetical protein                                                                      | 2461 | 3732973 | 3733086 | 17.69911504 | 0          | 0       |
| 4-alpha-glucanotransferase (amylomaltase) (EC 2.4.1.25)                                   | 2460 | 3733124 | 3735151 | 170.6231454 | 64.5400593 | 0.37826 |
| NADP-specific glutamate dehydrogenase (EC 1.4.1.4)                                        | 2459 | 3735189 | 3735548 | 229.8050139 | 131.615599 | 0.57273 |
| Periplasmic [Fe] hydrogenase (EC 1.12.7.2)                                                | 2458 | 3735558 | 3737645 | 195.7355055 | 178.965022 | 0.91432 |
| GCN5-related N-acetyltransferase                                                          | 2457 | 3738018 | 3738617 | 20.86811352 | 15.0250417 | 0.72    |
| transposase, mutator family                                                               | 2456 | 3738722 | 3739963 | 68.89605157 | 39.8871878 | 0.57895 |
| CDS_ID OB3186                                                                             | 2455 | 3740081 | 3740791 | 5.035971223 | 3.23741007 | 0.64286 |
| Phosphoesterase family protein                                                            | 2454 | 3741173 | 3741979 | 269.8511166 | 200.992556 | 0.74483 |
| Hydrolase (HAD superfamily)                                                               | 2453 | 3741991 | 3743520 | 854.8821549 | 1136.36364 | 1.32926 |
| hypothetical protein                                                                      | 2452 | 3743514 | 3743687 | 26.01156069 | 26.0115607 | 1       |
| Transposase, mutator type                                                                 |      | 3743867 | 3743992 | 48.67256637 | 19.9115044 | 0.40909 |
| transposase, mutator family                                                               |      | 3743993 | 3744565 | 26.47657841 | 0          | 0       |
| Cell surface protein                                                                      | 2449 | 3744851 | 3749743 | 33.01308258 | 12.8781684 | 0.39009 |
| hypothetical protein                                                                      | 2448 | 3749822 | 3749998 | 36.93181818 | 25.5681818 | 0.69231 |
| hypothetical protein                                                                      | 2447 | 3750238 | 3750360 | 16.39344262 | 55.3278689 | 3.375   |
| hypothetical protein                                                                      | 2446 | 3750325 | 3750459 | 14.92537313 | 0          | 0       |
| Chemotaxis regulator - transmits chemoreceptor signals to flagellar motor components CheY | 2445 | 3750587 | 3750952 | 38.35616438 | 18.4931507 | 0.48214 |
| Chemotaxis protein CheX                                                                   | 2444 | 3750975 | 3751454 | 37.5782881  | 14.091858  | 0.375   |
| hypothetical protein                                                                      | 2443 | 3751473 | 3752612 | 32.92361721 | 13.8279192 | 0.42    |
| Chemotaxis protein CheA (EC 2.7.3.-)                                                      | 2442 | 3752625 | 3754553 | 32.41701245 | 2.3340249  | 0.072   |
| NrtR-regulated hypothetical OrfX                                                          | 2441 | 3754666 | 3755709 | 182.6462128 | 172.579099 | 0.94488 |
| NrtR-regulated hypothetical OrfY                                                          | 2440 | 3755748 | 3756857 | 112.7141569 | 75.0676285 | 0.666   |
| Nitroreductase family protein                                                             | 2439 | 3757067 | 3757606 | 36.17810761 | 8.34879406 | 0.23077 |
| archaeal ATPase, fused to C-terminal DUF234 domain                                        |      | 3757670 | 3758866 | 49.33110368 | 31.9816054 | 0.64831 |
| Sensory box histidine kinase/response regulator                                           | 2437 | 3759156 | 3762251 | 37.80290792 | 2.90791599 | 0.07692 |
| Response regulator                                                                        | 2436 | 3762238 | 3763377 | 26.77787533 | 3.95083406 | 0.14754 |
| Type I restriction-modification system, DNA-methyltransferase subunit M (EC 2.1.1.72)     | 2435 | 3763472 | 3765076 | 171.7581047 | 159.912718 | 0.93103 |
| hypothetical protein                                                                      | 2434 | 3765078 | 3765419 | 98.24046921 | 46.1876833 | 0.47015 |
| Type I restriction-modification system, specificity subunit S (EC 3.1.21.3)               | 2433 | 3765596 | 3766708 | 17.98561151 | 18.2104317 | 1.0125  |
| hypothetical protein                                                                      | 2432 | 3766721 | 3767578 | 5.834305718 | 2.62543757 | 0.45    |
| hypothetical protein                                                                      | 2431 | 3767575 | 3768030 | 6.593406593 | 0          | 0       |



|                                                                                                                                                      |      |         |         |             |            |         |
|------------------------------------------------------------------------------------------------------------------------------------------------------|------|---------|---------|-------------|------------|---------|
| hypothetical protein                                                                                                                                 | 2430 | 3768141 | 3768323 | 32.96703297 | 12.3626374 | 0.375   |
| hypothetical protein                                                                                                                                 | 2429 | 3768325 | 3768519 | 30.92783505 | 0          | 0       |
| hypothetical protein                                                                                                                                 | 2428 | 3768710 | 3769012 | 34.76821192 | 0          | 0       |
| hypothetical protein                                                                                                                                 | 2427 | 3769082 | 3769411 | 234.0425532 | 225.683891 | 0.96429 |
| Type I restriction-modification system, restriction subunit R (EC 3.1.21.3)                                                                          | 2426 | 3769495 | 3772776 | 84.5778726  | 68.5766535 | 0.81081 |
| hypothetical protein                                                                                                                                 | 2425 | 3772899 | 3774053 | 179.3760832 | 175.476603 | 0.97826 |
| Sensor histidine kinase/response regulator (EC 2.7.3.-)                                                                                              | 2424 | 3774085 | 3776262 | 56.72944419 | 47.5424897 | 0.83806 |
| Potassium uptake protein TrkH                                                                                                                        | 2423 | 3776295 | 3777755 | 52.05479452 | 36.9863014 | 0.71053 |
| Trk system potassium uptake protein trkA                                                                                                             | 2422 | 3777761 | 3779209 | 89.84105045 | 54.422944  | 0.60577 |
| hypothetical protein                                                                                                                                 | 2421 | 3779851 | 3779970 | 16.80672269 | 0          | 0       |
| hypothetical protein                                                                                                                                 | 2420 | 3780015 | 3780290 | 65.69343066 | 0          | 0       |
| hypothetical protein                                                                                                                                 | 2419 | 3780402 | 3780608 | 0           | 0          | #DIV/0! |
| PIN domain protein                                                                                                                                   | 2418 | 3780605 | 3781003 | 29.8013245  | 37.2516556 | 1.25    |
| Transposase IS4 family protein                                                                                                                       | 2417 | 3781146 | 3782684 | 32.1846554  | 13.1664499 | 0.40909 |
| Transposase IS116/IS110/IS902                                                                                                                        |      | 3782963 | 3783700 | 26.93370166 | 12.4309392 | 0.46154 |
| hypothetical protein                                                                                                                                 | 2415 | 3784520 | 3785404 | 42.42081448 | 35.6334842 | 0.84    |
| Transposase                                                                                                                                          |      | 3785512 | 3786402 | 42.69662921 | 27.8089888 | 0.65132 |
| Transposase IS4 family protein                                                                                                                       |      | 3786399 | 3786647 | 74.59677419 | 36.2903226 | 0.48649 |
| hypothetical protein                                                                                                                                 | 2412 | 3786800 | 3786958 | 28.48101266 | 0          | 0       |
| Putative transposase                                                                                                                                 | 2411 | 3787026 | 3787478 | 44.24778761 | 24.8893805 | 0.5625  |
| transposase, mutator family                                                                                                                          | 2410 | 3787558 | 3788727 | 73.56715141 | 42.3438837 | 0.57558 |
| transposase, mutator family                                                                                                                          | 2409 | 3788732 | 3789544 | 99.13793103 | 49.8768473 | 0.50311 |
| transposase, mutator family                                                                                                                          | 2408 | 3789549 | 3790433 | 92.19457014 | 33.0882353 | 0.3589  |
| hypothetical protein                                                                                                                                 | 2407 | 3790554 | 3790766 | 33.01886792 | 21.2264151 | 0.64286 |
| Type I restriction-modification system, DNA-methyltransferase subunit M (EC 2.1.1.72)                                                                | 2406 | 3790930 | 3792432 | 11.9840213  | 11.9840213 | 1       |
| hypothetical protein                                                                                                                                 | 2404 | 3792433 | 3793185 | 7.313829787 | 0          | 0       |
| hypothetical protein                                                                                                                                 | 2405 | 3793163 | 3793462 | 11.70568562 | 0          | 0       |
| hypothetical protein                                                                                                                                 | 2403 | 3793459 | 3793662 | 17.24137931 | 0          | 0       |
| hypothetical protein                                                                                                                                 | 2402 | 3793774 | 3793902 | 35.15625    | 17.578125  | 0.5     |
| Fructose-bisphosphate aldolase (EC 4.1.2.13) / Tagatose 1,6-diphosphate aldolase (EC 4.1.2.40); Fructose-bisphosphate aldolase class I (EC 4.1.2.13) | 2401 | 3793992 | 3795461 | 50.37440436 | 32.1647379 | 0.63851 |
| 2-hydroxy-3-oxopropionate reductase (EC 1.1.1.60)                                                                                                    | 2400 | 3795471 | 3796373 | 33.81374723 | 34.9223947 | 1.03279 |
| 6-phosphogluconolactonase (EC 3.1.1.31)                                                                                                              | 2399 | 3796375 | 3797454 | 44.48563485 | 14.5968489 | 0.32813 |
| Sorbitol dehydrogenase (EC 1.1.1.14)                                                                                                                 | 2397 | 3797486 | 3798559 | 94.12861137 | 73.3923579 | 0.7797  |
| Membrane endopeptidase, M50 family                                                                                                                   | 2398 | 3798556 | 3799230 | 39.31750742 | 20.0296736 | 0.50943 |
| Methyl-directed repair DNA adenine methylase (EC 2.1.1.72)                                                                                           | 2396 | 3799227 | 3800087 | 34.30232558 | 18.3139535 | 0.5339  |
| hypothetical protein                                                                                                                                 | 2395 | 3800165 | 3801106 | 95.64293305 | 54.9946865 | 0.575   |
| Tripeptide aminopeptidase (EC 3.4.11.4)                                                                                                              | 2394 | 3801084 | 3802406 | 118.3812405 | 122.541604 | 1.03514 |
| hypothetical protein                                                                                                                                 | 2393 | 3802448 | 3803350 | 110.864745  | 127.217295 | 1.1475  |
| Sodium-dependent phosphate transporter                                                                                                               | 2392 | 3803401 | 3805083 | 108.2045184 | 124.40547  | 1.14973 |
| Tryptophanyl-tRNA synthetase (EC 6.1.1.2)                                                                                                            | 2391 | 3805197 | 3806195 | 355.8375635 | 308.375635 | 0.86662 |
| Hypothetical lipoprotein                                                                                                                             | 2390 | 3806258 | 3807490 | 1819.705642 | 2071.54538 | 1.1384  |
| ABC-type sugar transport system, ATP-binding protein (EC 3.6.3.17)                                                                                   | 2389 | 3807572 | 3809170 | 123.59199   | 83.0725907 | 0.67215 |
| ABC transporter integral membrane protein                                                                                                            | 2388 | 3809167 | 3810237 | 78.5046729  | 50.4672897 | 0.64286 |

|                                                                                         |      |         |         |             |            |         |
|-----------------------------------------------------------------------------------------|------|---------|---------|-------------|------------|---------|
| ABC transporter integral membrane protein                                               | 2387 | 3810234 | 3811355 | 137.823372  | 112.399643 | 0.81553 |
| hypothetical protein                                                                    | 2386 | 3811470 | 3811805 | 95.52238806 | 73.880597  | 0.77344 |
| hypothetical protein                                                                    | 2385 | 3811938 | 3812702 | 134.1623037 | 126.636126 | 0.9439  |
| Uronate isomerase (EC 5.3.1.12)                                                         | 2384 | 3812725 | 3814164 | 139.33287   | 121.959694 | 0.87531 |
| Beta-glucosidase (EC 3.2.1.21)                                                          | 2383 | 3814183 | 3816585 | 66.4029975  | 33.7218984 | 0.50784 |
| unknown                                                                                 | 2382 | 3816643 | 3817614 | 52.00823893 | 41.7095778 | 0.80198 |
| hypothetical protein                                                                    | 2381 | 3817639 | 3819021 | 112.5180897 | 78.1476122 | 0.69453 |
| Thioredoxin reductase (EC 1.8.1.9)                                                      | 2380 | 3819129 | 3820082 | 127.4921301 | 84.9947534 | 0.66667 |
| Beta-hexosaminidase (EC 3.2.1.52)                                                       | 2379 | 3820095 | 3821783 | 86.78909953 | 75.9774882 | 0.87543 |
| GCN5-related N-acetyltransferase,<br>fig 164756.6.peg.1929 homolog                      | 2378 | 3821785 | 3822642 | 106.7677946 | 68.2613769 | 0.63934 |
| Outer membrane protein                                                                  | 2377 | 3822673 | 3823803 | 148.2300885 | 125.442478 | 0.84627 |
| Predicted transcriptional regulator of N-<br>Acetylglucosamine utilization, GntR family | 2376 | 3823938 | 3824678 | 47.97297297 | 27.3648649 | 0.57042 |
| Phosphoglycolate phosphatase (EC 3.1.3.18)                                              | 2375 | 3824766 | 3825410 | 141.3043478 | 115.295031 | 0.81593 |
| ABC transporter, permease protein, putative                                             | 2374 | 3825444 | 3826721 | 50.1174628  | 29.9530149 | 0.59766 |
| hypothetical protein                                                                    | 2372 | 3826750 | 3826956 | 155.3398058 | 185.679612 | 1.19531 |
| hypothetical protein                                                                    | 2373 | 3826953 | 3827156 | 128.0788177 | 177.339901 | 1.38462 |
| hypothetical protein                                                                    | 2371 | 3827137 | 3827694 | 39.497307   | 32.3159785 | 0.81818 |
| DNA-binding protein                                                                     | 2370 | 3827749 | 3828018 | 70.63197026 | 25.0929368 | 0.35526 |
| Integrase domain protein                                                                | 2369 | 3828815 | 3830050 | 49.79757085 | 9.10931174 | 0.18293 |
| hypothetical protein                                                                    | 2368 | 3830581 | 3830694 | 8.849557522 | 0          | 0       |
| hypothetical protein                                                                    | 2367 | 3830986 | 3831273 | 15.67944251 | 7.83972125 | 0.5     |
| PIN domain protein                                                                      | 2366 | 3831338 | 3831733 | 5.063291139 | 0          | 0       |
| hypothetical protein                                                                    |      | 3831876 | 3832310 | 108.2949309 | 25.921659  | 0.23936 |
| hypothetical protein                                                                    | 2364 | 3832407 | 3832547 | 35.71428571 | 0          | 0       |
| hypothetical protein                                                                    | 2363 | 3832801 | 3834006 | 225.3112033 | 164.315353 | 0.72928 |
| Sensory box histidine kinase/response regulator                                         | 2362 | 3834025 | 3836160 | 70.52186178 | 61.3540197 | 0.87    |
| hypothetical protein                                                                    | 2361 | 3836209 | 3836343 | 85.82089552 | 16.7910448 | 0.19565 |
| hypothetical protein                                                                    | 2360 | 3836547 | 3836675 | 113.28125   | 140.625    | 1.24138 |
| hypothetical protein                                                                    | 2359 | 3836956 | 3837180 | 35.71428571 | 90.4017857 | 2.53125 |
| hypothetical protein                                                                    | 2358 | 3837233 | 3837364 | 38.16793893 | 34.351145  | 0.9     |
| hypothetical protein                                                                    | 2357 | 3837398 | 3837595 | 65.98984772 | 68.5279188 | 1.03846 |
| Conserved domain protein                                                                | 2356 | 3837994 | 3838884 | 192.6966292 | 121.348315 | 0.62974 |
| hypothetical protein                                                                    | 2355 | 3839019 | 3839246 | 165.1982379 | 99.1189427 | 0.6     |
| Lipase precursor (EC 3.1.1.3)                                                           | 2354 | 3839577 | 3840377 | 150         | 81.5625    | 0.54375 |
| EBSC protein                                                                            | 2353 | 3840399 | 3840884 | 338.1443299 | 273.71134  | 0.80945 |
| hypothetical protein                                                                    | 2352 | 3841126 | 3841629 | 135.1888668 | 147.614314 | 1.09191 |
| probable metal-dependent peptidase                                                      | 2350 | 3841709 | 3842392 | 169.8389458 | 204.245974 | 1.20259 |
| DNA gyrase subunit A (EC 5.99.1.3)                                                      | 2351 | 3842361 | 3844898 | 359.8738668 | 428.360268 | 1.19031 |
| alpha-arabinosides ABC transport system,<br>substrate-binding protein araN              | 2349 | 3845009 | 3846313 | 1688.266871 | 1634.01074 | 0.96786 |
| Lactose transport system                                                                | 2348 | 3846377 | 3847255 | 133.2574032 | 84.5671982 | 0.63462 |
| Lactose transport system                                                                | 2346 | 3847252 | 3848061 | 152.039555  | 102.904821 | 0.67683 |
| Leucine-rich-repeat protein                                                             | 2347 | 3848054 | 3849007 | 90.7660021  | 66.1070304 | 0.72832 |
| Von Willebrand factor type A domain protein                                             | 2345 | 3849021 | 3850907 | 143.4252386 | 122.879109 | 0.85675 |
| GldJ                                                                                    | 2344 | 3850916 | 3851734 | 346.5770171 | 338.325183 | 0.97619 |
| hypothetical protein                                                                    | 2343 | 3851733 | 3852158 | 55.29411765 | 5.29411765 | 0.09574 |
| ATPase                                                                                  | 2342 | 3852221 | 3853447 | 61.17455139 | 51.3866232 | 0.84    |
| hypothetical protein                                                                    | 2340 | 3853463 | 3853687 | 46.875      | 30.1339286 | 0.64286 |
| DNA gyrase subunit B (EC 5.99.1.3)                                                      | 2341 | 3853671 | 3855617 | 521.5827338 | 659.044193 | 1.26355 |
